# Supplementary material for: Spin Orbit Coupling in Orthogonal Charge Transfer States: (TD-)DFT of Pyrene - Dimethylaniline
Source: Preprints.org preprint supplement (doi:10.20944/preprints202112.0109.v2), 2021-12-16
Supplement: Supplementary file 1 [file supplementary]

This folder contains input files for ADF 2019 to determine the internal reorganization energy.

Li = Lambda Internal

CRS = Charge recombination to the singlet ground state

CRT = charge recombination to the triplet

ACN = acetonitrile solvent

NHX = n-hexane solvent

Gas = gas-phase

Acc = electron acceptor

Don = electron donor

GeoCharge = using the geometry of the charged unit

GeoNeut = using the geometry of the neutral unit

GeoTrip = using the geometry of the unit in the triplet state

GeoOpt = geometry optimization

Neutr = neutral unit, charge is zero

Charged = unit has a charge on it, (either radial cation or radical anion)

SP = single point calculation

E = energy
