# Supplementary material for: Spin Orbit Coupling in Orthogonal Charge Transfer States: (TD-)DFT of Pyrene - Dimethylaniline
Source: Preprints.org preprint supplement (doi:10.20944/preprints202112.0109.v2), 2021-12-16
Supplement: Supplementary file 3 [file supplementary]

Archive with 1,506 entries (774 files):
- Supporting INFO-14-12-2021/
- Supporting INFO-14-12-2021/.DS_Store
- __MACOSX/
- __MACOSX/Supporting INFO-14-12-2021/
- __MACOSX/Supporting INFO-14-12-2021/._.DS_Store
- Supporting INFO-14-12-2021/Coordinate files/
- Supporting INFO-14-12-2021/Coordinate files/.DS_Store
- __MACOSX/Supporting INFO-14-12-2021/Coordinate files/
- __MACOSX/Supporting INFO-14-12-2021/Coordinate files/._.DS_Store
- Supporting INFO-14-12-2021/Coordinate files/4-thiothymine-B/
- Supporting INFO-14-12-2021/Coordinate files/4-thiothymine-B/.DS_Store
- __MACOSX/Supporting INFO-14-12-2021/Coordinate files/4-thiothymine-B/
- __MACOSX/Supporting INFO-14-12-2021/Coordinate files/4-thiothymine-B/._.DS_Store
- Supporting INFO-14-12-2021/Coordinate files/4-thiothymine-B/PBE/
- Supporting INFO-14-12-2021/Coordinate files/4-thiothymine-B/PBE/.DS_Store
- __MACOSX/Supporting INFO-14-12-2021/Coordinate files/4-thiothymine-B/PBE/
- __MACOSX/Supporting INFO-14-12-2021/Coordinate files/4-thiothymine-B/PBE/._.DS_Store
- Supporting INFO-14-12-2021/Coordinate files/4-thiothymine-B/PBE/S0/
- Supporting INFO-14-12-2021/Coordinate files/4-thiothymine-B/PBE/S0/4-thio-thymine-S0-PBE.mol
- __MACOSX/Supporting INFO-14-12-2021/Coordinate files/4-thiothymine-B/PBE/S0/
- __MACOSX/Supporting INFO-14-12-2021/Coordinate files/4-thiothymine-B/PBE/S0/._4-thio-thymine-S0-PBE.mol
- Supporting INFO-14-12-2021/Coordinate files/4-thiothymine-B/PBE/S0/4-thio-thymine-S0.out
- __MACOSX/Supporting INFO-14-12-2021/Coordinate files/4-thiothymine-B/PBE/S0/._4-thio-thymine-S0.out
- __MACOSX/Supporting INFO-14-12-2021/Coordinate files/4-thiothymine-B/PBE/._S0
- Supporting INFO-14-12-2021/Coordinate files/4-thiothymine-B/PBE/S1/
- Supporting INFO-14-12-2021/Coordinate files/4-thiothymine-B/PBE/S1/4-thio-thymine-S1-PBE.mol
- __MACOSX/Supporting INFO-14-12-2021/Coordinate files/4-thiothymine-B/PBE/S1/
- __MACOSX/Supporting INFO-14-12-2021/Coordinate files/4-thiothymine-B/PBE/S1/._4-thio-thymine-S1-PBE.mol
- Supporting INFO-14-12-2021/Coordinate files/4-thiothymine-B/PBE/S1/4-thio-thymine-S1.out
- __MACOSX/Supporting INFO-14-12-2021/Coordinate files/4-thiothymine-B/PBE/S1/._4-thio-thymine-S1.out
- __MACOSX/Supporting INFO-14-12-2021/Coordinate files/4-thiothymine-B/PBE/._S1
- Supporting INFO-14-12-2021/Coordinate files/4-thiothymine-B/PBE/S2/
- Supporting INFO-14-12-2021/Coordinate files/4-thiothymine-B/PBE/S2/4-thio-thymine-S2-PBE.mol
- __MACOSX/Supporting INFO-14-12-2021/Coordinate files/4-thiothymine-B/PBE/S2/
- __MACOSX/Supporting INFO-14-12-2021/Coordinate files/4-thiothymine-B/PBE/S2/._4-thio-thymine-S2-PBE.mol
- Supporting INFO-14-12-2021/Coordinate files/4-thiothymine-B/PBE/S2/4-thio-thymine-S2.out
- __MACOSX/Supporting INFO-14-12-2021/Coordinate files/4-thiothymine-B/PBE/S2/._4-thio-thymine-S2.out
- __MACOSX/Supporting INFO-14-12-2021/Coordinate files/4-thiothymine-B/PBE/._S2
- Supporting INFO-14-12-2021/Coordinate files/4-thiothymine-B/PBE/T1/
- Supporting INFO-14-12-2021/Coordinate files/4-thiothymine-B/PBE/T1/4-thio-thymine-T1-PBE.mol
- __MACOSX/Supporting INFO-14-12-2021/Coordinate files/4-thiothymine-B/PBE/T1/
- __MACOSX/Supporting INFO-14-12-2021/Coordinate files/4-thiothymine-B/PBE/T1/._4-thio-thymine-T1-PBE.mol
- Supporting INFO-14-12-2021/Coordinate files/4-thiothymine-B/PBE/T1/4-thio-thymine-T1.out
- __MACOSX/Supporting INFO-14-12-2021/Coordinate files/4-thiothymine-B/PBE/T1/._4-thio-thymine-T1.out
- __MACOSX/Supporting INFO-14-12-2021/Coordinate files/4-thiothymine-B/PBE/._T1
- __MACOSX/Supporting INFO-14-12-2021/Coordinate files/4-thiothymine-B/._PBE
- __MACOSX/Supporting INFO-14-12-2021/Coordinate files/._4-thiothymine-B
- Supporting INFO-14-12-2021/Coordinate files/ACETONE-B/
- Supporting INFO-14-12-2021/Coordinate files/ACETONE-B/.DS_Store
- __MACOSX/Supporting INFO-14-12-2021/Coordinate files/ACETONE-B/
- __MACOSX/Supporting INFO-14-12-2021/Coordinate files/ACETONE-B/._.DS_Store
- Supporting INFO-14-12-2021/Coordinate files/ACETONE-B/PBE/
- Supporting INFO-14-12-2021/Coordinate files/ACETONE-B/PBE/.DS_Store
- __MACOSX/Supporting INFO-14-12-2021/Coordinate files/ACETONE-B/PBE/
- __MACOSX/Supporting INFO-14-12-2021/Coordinate files/ACETONE-B/PBE/._.DS_Store
- Supporting INFO-14-12-2021/Coordinate files/ACETONE-B/PBE/S0/
- Supporting INFO-14-12-2021/Coordinate files/ACETONE-B/PBE/S0/acetone-S0-PBE.mol
- __MACOSX/Supporting INFO-14-12-2021/Coordinate files/ACETONE-B/PBE/S0/
- __MACOSX/Supporting INFO-14-12-2021/Coordinate files/ACETONE-B/PBE/S0/._acetone-S0-PBE.mol
- Supporting INFO-14-12-2021/Coordinate files/ACETONE-B/PBE/S0/acetone-S0.out
- __MACOSX/Supporting INFO-14-12-2021/Coordinate files/ACETONE-B/PBE/S0/._acetone-S0.out
- __MACOSX/Supporting INFO-14-12-2021/Coordinate files/ACETONE-B/PBE/._S0
- Supporting INFO-14-12-2021/Coordinate files/ACETONE-B/PBE/S1/
- Supporting INFO-14-12-2021/Coordinate files/ACETONE-B/PBE/S1/acetone-S1-PBE.mol
- __MACOSX/Supporting INFO-14-12-2021/Coordinate files/ACETONE-B/PBE/S1/
- __MACOSX/Supporting INFO-14-12-2021/Coordinate files/ACETONE-B/PBE/S1/._acetone-S1-PBE.mol
- Supporting INFO-14-12-2021/Coordinate files/ACETONE-B/PBE/S1/acetone-S1.out
- __MACOSX/Supporting INFO-14-12-2021/Coordinate files/ACETONE-B/PBE/S1/._acetone-S1.out
- __MACOSX/Supporting INFO-14-12-2021/Coordinate files/ACETONE-B/PBE/._S1
- Supporting INFO-14-12-2021/Coordinate files/ACETONE-B/PBE/S2/
- Supporting INFO-14-12-2021/Coordinate files/ACETONE-B/PBE/S2/acetone-S2-PBE.mol
- __MACOSX/Supporting INFO-14-12-2021/Coordinate files/ACETONE-B/PBE/S2/
- __MACOSX/Supporting INFO-14-12-2021/Coordinate files/ACETONE-B/PBE/S2/._acetone-S2-PBE.mol
- Supporting INFO-14-12-2021/Coordinate files/ACETONE-B/PBE/S2/acetone-S2.out
- __MACOSX/Supporting INFO-14-12-2021/Coordinate files/ACETONE-B/PBE/S2/._acetone-S2.out
- __MACOSX/Supporting INFO-14-12-2021/Coordinate files/ACETONE-B/PBE/._S2
- Supporting INFO-14-12-2021/Coordinate files/ACETONE-B/PBE/T1/
- Supporting INFO-14-12-2021/Coordinate files/ACETONE-B/PBE/T1/acetone-T1-PBE.mol
- __MACOSX/Supporting INFO-14-12-2021/Coordinate files/ACETONE-B/PBE/T1/
- __MACOSX/Supporting INFO-14-12-2021/Coordinate files/ACETONE-B/PBE/T1/._acetone-T1-PBE.mol
- Supporting INFO-14-12-2021/Coordinate files/ACETONE-B/PBE/T1/acetone-T1.out
- __MACOSX/Supporting INFO-14-12-2021/Coordinate files/ACETONE-B/PBE/T1/._acetone-T1.out
- __MACOSX/Supporting INFO-14-12-2021/Coordinate files/ACETONE-B/PBE/._T1
- __MACOSX/Supporting INFO-14-12-2021/Coordinate files/ACETONE-B/._PBE
- __MACOSX/Supporting INFO-14-12-2021/Coordinate files/._ACETONE-B
- Supporting INFO-14-12-2021/Coordinate files/PyrDMA/
- Supporting INFO-14-12-2021/Coordinate files/PyrDMA/.DS_Store
- __MACOSX/Supporting INFO-14-12-2021/Coordinate files/PyrDMA/
- __MACOSX/Supporting INFO-14-12-2021/Coordinate files/PyrDMA/._.DS_Store
- Supporting INFO-14-12-2021/Coordinate files/PyrDMA/CAMYLYP/
- Supporting INFO-14-12-2021/Coordinate files/PyrDMA/CAMYLYP/.DS_Store
- __MACOSX/Supporting INFO-14-12-2021/Coordinate files/PyrDMA/CAMYLYP/
- __MACOSX/Supporting INFO-14-12-2021/Coordinate files/PyrDMA/CAMYLYP/._.DS_Store
- Supporting INFO-14-12-2021/Coordinate files/PyrDMA/CAMYLYP/S0/
- Supporting INFO-14-12-2021/Coordinate files/PyrDMA/CAMYLYP/S0/PyrDMA-geometry-CAMYLYP-S0-ACN.mol
- __MACOSX/Supporting INFO-14-12-2021/Coordinate files/PyrDMA/CAMYLYP/S0/
- __MACOSX/Supporting INFO-14-12-2021/Coordinate files/PyrDMA/CAMYLYP/S0/._PyrDMA-geometry-CAMYLYP-S0-ACN.mol
- Supporting INFO-14-12-2021/Coordinate files/PyrDMA/CAMYLYP/S0/PyrDMA-geometry-CAMYLYP-S0-gas.mol
- __MACOSX/Supporting INFO-14-12-2021/Coordinate files/PyrDMA/CAMYLYP/S0/._PyrDMA-geometry-CAMYLYP-S0-gas.mol
- Supporting INFO-14-12-2021/Coordinate files/PyrDMA/CAMYLYP/S0/PyrDMA-geometry-CAMYLYP-S0-Hexane.mol
- __MACOSX/Supporting INFO-14-12-2021/Coordinate files/PyrDMA/CAMYLYP/S0/._PyrDMA-geometry-CAMYLYP-S0-Hexane.mol
- Supporting INFO-14-12-2021/Coordinate files/PyrDMA/CAMYLYP/S1/
- Supporting INFO-14-12-2021/Coordinate files/PyrDMA/CAMYLYP/S1/PyrDMA-geometry-CAMYLYP-S1-ACN.mol
- __MACOSX/Supporting INFO-14-12-2021/Coordinate files/PyrDMA/CAMYLYP/S1/
- __MACOSX/Supporting INFO-14-12-2021/Coordinate files/PyrDMA/CAMYLYP/S1/._PyrDMA-geometry-CAMYLYP-S1-ACN.mol
- Supporting INFO-14-12-2021/Coordinate files/PyrDMA/CAMYLYP/S1/PyrDMA-geometry-CAMYLYP-S1-gas.mol
- __MACOSX/Supporting INFO-14-12-2021/Coordinate files/PyrDMA/CAMYLYP/S1/._PyrDMA-geometry-CAMYLYP-S1-gas.mol
- Supporting INFO-14-12-2021/Coordinate files/PyrDMA/CAMYLYP/S1/PyrDMA-geometry-CAMYLYP-S1-Hexane.mol
- __MACOSX/Supporting INFO-14-12-2021/Coordinate files/PyrDMA/CAMYLYP/S1/._PyrDMA-geometry-CAMYLYP-S1-Hexane.mol
- Supporting INFO-14-12-2021/Coordinate files/PyrDMA/CAMYLYP/S2/
- Supporting INFO-14-12-2021/Coordinate files/PyrDMA/CAMYLYP/S2/PyrDMA-geometry-CAMYLYP-S2-ACN.mol
- __MACOSX/Supporting INFO-14-12-2021/Coordinate files/PyrDMA/CAMYLYP/S2/
- __MACOSX/Supporting INFO-14-12-2021/Coordinate files/PyrDMA/CAMYLYP/S2/._PyrDMA-geometry-CAMYLYP-S2-ACN.mol
- Supporting INFO-14-12-2021/Coordinate files/PyrDMA/CAMYLYP/S2/PyrDMA-geometry-CAMYLYP-S2-gas.mol
- __MACOSX/Supporting INFO-14-12-2021/Coordinate files/PyrDMA/CAMYLYP/S2/._PyrDMA-geometry-CAMYLYP-S2-gas.mol
- Supporting INFO-14-12-2021/Coordinate files/PyrDMA/CAMYLYP/T1/
- Supporting INFO-14-12-2021/Coordinate files/PyrDMA/CAMYLYP/T1/PyrDMA-geometry-CAMYLYP-T1-ACN.mol
- __MACOSX/Supporting INFO-14-12-2021/Coordinate files/PyrDMA/CAMYLYP/T1/
- __MACOSX/Supporting INFO-14-12-2021/Coordinate files/PyrDMA/CAMYLYP/T1/._PyrDMA-geometry-CAMYLYP-T1-ACN.mol
- Supporting INFO-14-12-2021/Coordinate files/PyrDMA/CAMYLYP/T1/PyrDMA-geometry-CAMYLYP-T1-gas.mol
- __MACOSX/Supporting INFO-14-12-2021/Coordinate files/PyrDMA/CAMYLYP/T1/._PyrDMA-geometry-CAMYLYP-T1-gas.mol
- Supporting INFO-14-12-2021/Coordinate files/PyrDMA/CAMYLYP/T1/PyrDMA-geometry-CAMYLYP-T1-Hexane.mol
- __MACOSX/Supporting INFO-14-12-2021/Coordinate files/PyrDMA/CAMYLYP/T1/._PyrDMA-geometry-CAMYLYP-T1-Hexane.mol
- Supporting INFO-14-12-2021/Coordinate files/PyrDMA/CAMYLYP/T2/
- Supporting INFO-14-12-2021/Coordinate files/PyrDMA/CAMYLYP/T2/PyrDMA-geometry-CAMYLYP-T2-ACN.mol
- __MACOSX/Supporting INFO-14-12-2021/Coordinate files/PyrDMA/CAMYLYP/T2/
- __MACOSX/Supporting INFO-14-12-2021/Coordinate files/PyrDMA/CAMYLYP/T2/._PyrDMA-geometry-CAMYLYP-T2-ACN.mol
- Supporting INFO-14-12-2021/Coordinate files/PyrDMA/CAMYLYP/T2/PyrDMA-geometry-CAMYLYP-T2-gas.mol
- __MACOSX/Supporting INFO-14-12-2021/Coordinate files/PyrDMA/CAMYLYP/T2/._PyrDMA-geometry-CAMYLYP-T2-gas.mol
- Supporting INFO-14-12-2021/Coordinate files/PyrDMA/CAMYLYP/T2/PyrDMA-geometry-CAMYLYP-T2-Hexane.mol
- __MACOSX/Supporting INFO-14-12-2021/Coordinate files/PyrDMA/CAMYLYP/T2/._PyrDMA-geometry-CAMYLYP-T2-Hexane.mol
- Supporting INFO-14-12-2021/Coordinate files/PyrDMA/PBE/
- Supporting INFO-14-12-2021/Coordinate files/PyrDMA/PBE/S0/
- Supporting INFO-14-12-2021/Coordinate files/PyrDMA/PBE/S0/PyrDMA-geometry-PBE-S0-ACN.mol
- __MACOSX/Supporting INFO-14-12-2021/Coordinate files/PyrDMA/PBE/
- __MACOSX/Supporting INFO-14-12-2021/Coordinate files/PyrDMA/PBE/S0/
- __MACOSX/Supporting INFO-14-12-2021/Coordinate files/PyrDMA/PBE/S0/._PyrDMA-geometry-PBE-S0-ACN.mol
- Supporting INFO-14-12-2021/Coordinate files/PyrDMA/PBE/S0/PyrDMA-geometry-PBE-S0-Gas.mol
- __MACOSX/Supporting INFO-14-12-2021/Coordinate files/PyrDMA/PBE/S0/._PyrDMA-geometry-PBE-S0-Gas.mol
- Supporting INFO-14-12-2021/Coordinate files/PyrDMA/PBE/S0/PyrDMA-geometry-PBE-S0-Hexane.mol
- __MACOSX/Supporting INFO-14-12-2021/Coordinate files/PyrDMA/PBE/S0/._PyrDMA-geometry-PBE-S0-Hexane.mol
- Supporting INFO-14-12-2021/Coordinate files/PyrDMA/PBE/S1/
- Supporting INFO-14-12-2021/Coordinate files/PyrDMA/PBE/S1/PyrDMA-geometry-PBE-S1-ACN.mol
- __MACOSX/Supporting INFO-14-12-2021/Coordinate files/PyrDMA/PBE/S1/
- __MACOSX/Supporting INFO-14-12-2021/Coordinate files/PyrDMA/PBE/S1/._PyrDMA-geometry-PBE-S1-ACN.mol
- Supporting INFO-14-12-2021/Coordinate files/PyrDMA/PBE/S1/PyrDMA-geometry-PBE-S1-Gas.mol
- __MACOSX/Supporting INFO-14-12-2021/Coordinate files/PyrDMA/PBE/S1/._PyrDMA-geometry-PBE-S1-Gas.mol
- Supporting INFO-14-12-2021/Coordinate files/PyrDMA/PBE/S1/PyrDMA-geometry-PBE-S1-Hexane.mol
- __MACOSX/Supporting INFO-14-12-2021/Coordinate files/PyrDMA/PBE/S1/._PyrDMA-geometry-PBE-S1-Hexane.mol
- Supporting INFO-14-12-2021/Coordinate files/PyrDMA/PBE/S2/
- Supporting INFO-14-12-2021/Coordinate files/PyrDMA/PBE/S2/PyrDMA-geometry-PBE-S2-ACN.mol
- __MACOSX/Supporting INFO-14-12-2021/Coordinate files/PyrDMA/PBE/S2/
- __MACOSX/Supporting INFO-14-12-2021/Coordinate files/PyrDMA/PBE/S2/._PyrDMA-geometry-PBE-S2-ACN.mol
- Supporting INFO-14-12-2021/Coordinate files/PyrDMA/PBE/S2/PyrDMA-geometry-PBE-S2-Gas.mol
- __MACOSX/Supporting INFO-14-12-2021/Coordinate files/PyrDMA/PBE/S2/._PyrDMA-geometry-PBE-S2-Gas.mol
- Supporting INFO-14-12-2021/Coordinate files/PyrDMA/PBE/S2/PyrDMA-geometry-PBE-S2-Hexane.mol
- __MACOSX/Supporting INFO-14-12-2021/Coordinate files/PyrDMA/PBE/S2/._PyrDMA-geometry-PBE-S2-Hexane.mol
- Supporting INFO-14-12-2021/Coordinate files/PyrDMA/PBE/T1/
- Supporting INFO-14-12-2021/Coordinate files/PyrDMA/PBE/T1/PyrDMA-geometry-PBE-T1-ACN.mol
- __MACOSX/Supporting INFO-14-12-2021/Coordinate files/PyrDMA/PBE/T1/
- __MACOSX/Supporting INFO-14-12-2021/Coordinate files/PyrDMA/PBE/T1/._PyrDMA-geometry-PBE-T1-ACN.mol
- Supporting INFO-14-12-2021/Coordinate files/PyrDMA/PBE/T1/PyrDMA-geometry-PBE-T1-Gas.mol
- __MACOSX/Supporting INFO-14-12-2021/Coordinate files/PyrDMA/PBE/T1/._PyrDMA-geometry-PBE-T1-Gas.mol
- Supporting INFO-14-12-2021/Coordinate files/PyrDMA/PBE/T1/PyrDMA-geometry-PBE-T1-Hexane.mol
- __MACOSX/Supporting INFO-14-12-2021/Coordinate files/PyrDMA/PBE/T1/._PyrDMA-geometry-PBE-T1-Hexane.mol
- Supporting INFO-14-12-2021/Coordinate files/PyrDMA/PBE/T2/
- Supporting INFO-14-12-2021/Coordinate files/PyrDMA/PBE/T2/PyrDMA-geometry-PBE-T2-ACN.mol
- __MACOSX/Supporting INFO-14-12-2021/Coordinate files/PyrDMA/PBE/T2/
- __MACOSX/Supporting INFO-14-12-2021/Coordinate files/PyrDMA/PBE/T2/._PyrDMA-geometry-PBE-T2-ACN.mol
- Supporting INFO-14-12-2021/Coordinate files/PyrDMA/PBE/T2/PyrDMA-geometry-PBE-T2-Gas.mol
- __MACOSX/Supporting INFO-14-12-2021/Coordinate files/PyrDMA/PBE/T2/._PyrDMA-geometry-PBE-T2-Gas.mol
- Supporting INFO-14-12-2021/Coordinate files/PyrDMA/PBE/T2/PyrDMA-geometry-PBE-T2-Hexane.mol
- __MACOSX/Supporting INFO-14-12-2021/Coordinate files/PyrDMA/PBE/T2/._PyrDMA-geometry-PBE-T2-Hexane.mol
- Supporting INFO-14-12-2021/Coordinate files/PyrDMA/Starting coordinates/
- Supporting INFO-14-12-2021/Coordinate files/PyrDMA/Starting coordinates/Start-Coord-Pyr-DMA.mol2
- __MACOSX/Supporting INFO-14-12-2021/Coordinate files/PyrDMA/Starting coordinates/
- __MACOSX/Supporting INFO-14-12-2021/Coordinate files/PyrDMA/Starting coordinates/._Start-Coord-Pyr-DMA.mol2
- Supporting INFO-14-12-2021/Input files/
- Supporting INFO-14-12-2021/Input files/.DS_Store
- __MACOSX/Supporting INFO-14-12-2021/Input files/
- __MACOSX/Supporting INFO-14-12-2021/Input files/._.DS_Store
- Supporting INFO-14-12-2021/Input files/Gamma/
- Supporting INFO-14-12-2021/Input files/Gamma/4-thiothymine/
- Supporting INFO-14-12-2021/Input files/Gamma/4-thiothymine/Gamma=0.20/
- Supporting INFO-14-12-2021/Input files/Gamma/4-thiothymine/Gamma=0.20/4-thio-thymine-G20-SOC11.txt
- __MACOSX/Supporting INFO-14-12-2021/Input files/Gamma/
- __MACOSX/Supporting INFO-14-12-2021/Input files/Gamma/4-thiothymine/
- __MACOSX/Supporting INFO-14-12-2021/Input files/Gamma/4-thiothymine/Gamma=0.20/
- __MACOSX/Supporting INFO-14-12-2021/Input files/Gamma/4-thiothymine/Gamma=0.20/._4-thio-thymine-G20-SOC11.txt
- Supporting INFO-14-12-2021/Input files/Gamma/4-thiothymine/Gamma=0.25/
- Supporting INFO-14-12-2021/Input files/Gamma/4-thiothymine/Gamma=0.25/4-thio-thymine-G25-SOC12.txt
- __MACOSX/Supporting INFO-14-12-2021/Input files/Gamma/4-thiothymine/Gamma=0.25/
- __MACOSX/Supporting INFO-14-12-2021/Input files/Gamma/4-thiothymine/Gamma=0.25/._4-thio-thymine-G25-SOC12.txt
- Supporting INFO-14-12-2021/Input files/Gamma/4-thiothymine/Gamma=0.30/
- Supporting INFO-14-12-2021/Input files/Gamma/4-thiothymine/Gamma=0.30/4-thio-thymine-G30-SOC13.txt
- __MACOSX/Supporting INFO-14-12-2021/Input files/Gamma/4-thiothymine/Gamma=0.30/
- __MACOSX/Supporting INFO-14-12-2021/Input files/Gamma/4-thiothymine/Gamma=0.30/._4-thio-thymine-G30-SOC13.txt
- Supporting INFO-14-12-2021/Input files/Gamma/4-thiothymine/Gamma=0.35/
- Supporting INFO-14-12-2021/Input files/Gamma/4-thiothymine/Gamma=0.35/4-thio-thymine-G35-SOC14.txt
- __MACOSX/Supporting INFO-14-12-2021/Input files/Gamma/4-thiothymine/Gamma=0.35/
- __MACOSX/Supporting INFO-14-12-2021/Input files/Gamma/4-thiothymine/Gamma=0.35/._4-thio-thymine-G35-SOC14.txt
- Supporting INFO-14-12-2021/Input files/Gamma/4-thiothymine/Gamma=0.40/
- Supporting INFO-14-12-2021/Input files/Gamma/4-thiothymine/Gamma=0.40/4-thio-thymine-G40-SOC15.txt
- __MACOSX/Supporting INFO-14-12-2021/Input files/Gamma/4-thiothymine/Gamma=0.40/
- __MACOSX/Supporting INFO-14-12-2021/Input files/Gamma/4-thiothymine/Gamma=0.40/._4-thio-thymine-G40-SOC15.txt
- Supporting INFO-14-12-2021/Input files/Gamma/4-thiothymine/Gamma=0.45/
- Supporting INFO-14-12-2021/Input files/Gamma/4-thiothymine/Gamma=0.45/4-thio-thymine-G45-SOC16.txt
- __MACOSX/Supporting INFO-14-12-2021/Input files/Gamma/4-thiothymine/Gamma=0.45/
- __MACOSX/Supporting INFO-14-12-2021/Input files/Gamma/4-thiothymine/Gamma=0.45/._4-thio-thymine-G45-SOC16.txt
- Supporting INFO-14-12-2021/Input files/Gamma/4-thiothymine/Gamma=0.50/
- Supporting INFO-14-12-2021/Input files/Gamma/4-thiothymine/Gamma=0.50/4-thio-thymine-G50-SOC17.txt
- __MACOSX/Supporting INFO-14-12-2021/Input files/Gamma/4-thiothymine/Gamma=0.50/
- __MACOSX/Supporting INFO-14-12-2021/Input files/Gamma/4-thiothymine/Gamma=0.50/._4-thio-thymine-G50-SOC17.txt
- Supporting INFO-14-12-2021/Input files/Gamma/4-thiothymine/Gamma=0.55/
- Supporting INFO-14-12-2021/Input files/Gamma/4-thiothymine/Gamma=0.55/4-thio-thymine-G55-SOC18.txt
- __MACOSX/Supporting INFO-14-12-2021/Input files/Gamma/4-thiothymine/Gamma=0.55/
- __MACOSX/Supporting INFO-14-12-2021/Input files/Gamma/4-thiothymine/Gamma=0.55/._4-thio-thymine-G55-SOC18.txt
- Supporting INFO-14-12-2021/Input files/Gamma/4-thiothymine/Gamma=0.60/
- Supporting INFO-14-12-2021/Input files/Gamma/4-thiothymine/Gamma=0.60/4-thio-thymine-G60-SOC19.txt
- __MACOSX/Supporting INFO-14-12-2021/Input files/Gamma/4-thiothymine/Gamma=0.60/
- __MACOSX/Supporting INFO-14-12-2021/Input files/Gamma/4-thiothymine/Gamma=0.60/._4-thio-thymine-G60-SOC19.txt
- Supporting INFO-14-12-2021/Input files/Gamma/4-thiothymine/Gamma=0.65/
- Supporting INFO-14-12-2021/Input files/Gamma/4-thiothymine/Gamma=0.65/4-thio-thymine-G65-SOC20.txt
- __MACOSX/Supporting INFO-14-12-2021/Input files/Gamma/4-thiothymine/Gamma=0.65/
- __MACOSX/Supporting INFO-14-12-2021/Input files/Gamma/4-thiothymine/Gamma=0.65/._4-thio-thymine-G65-SOC20.txt
- Supporting INFO-14-12-2021/Input files/Gamma/ACETONE/
- Supporting INFO-14-12-2021/Input files/Gamma/ACETONE/Gamma=0.20/
- Supporting INFO-14-12-2021/Input files/Gamma/ACETONE/Gamma=0.20/acetone-G20-SOC.txt
- __MACOSX/Supporting INFO-14-12-2021/Input files/Gamma/ACETONE/
- __MACOSX/Supporting INFO-14-12-2021/Input files/Gamma/ACETONE/Gamma=0.20/
- __MACOSX/Supporting INFO-14-12-2021/Input files/Gamma/ACETONE/Gamma=0.20/._acetone-G20-SOC.txt
- Supporting INFO-14-12-2021/Input files/Gamma/ACETONE/Gamma=0.25/
- Supporting INFO-14-12-2021/Input files/Gamma/ACETONE/Gamma=0.25/acetone-G25-SOC.txt
- __MACOSX/Supporting INFO-14-12-2021/Input files/Gamma/ACETONE/Gamma=0.25/
- __MACOSX/Supporting INFO-14-12-2021/Input files/Gamma/ACETONE/Gamma=0.25/._acetone-G25-SOC.txt
- Supporting INFO-14-12-2021/Input files/Gamma/ACETONE/Gamma=0.30/
- Supporting INFO-14-12-2021/Input files/Gamma/ACETONE/Gamma=0.30/acetone-G30-SOC.txt
- __MACOSX/Supporting INFO-14-12-2021/Input files/Gamma/ACETONE/Gamma=0.30/
- __MACOSX/Supporting INFO-14-12-2021/Input files/Gamma/ACETONE/Gamma=0.30/._acetone-G30-SOC.txt
- Supporting INFO-14-12-2021/Input files/Gamma/ACETONE/Gamma=0.35/
- Supporting INFO-14-12-2021/Input files/Gamma/ACETONE/Gamma=0.35/acetone-G35-SOC.txt
- __MACOSX/Supporting INFO-14-12-2021/Input files/Gamma/ACETONE/Gamma=0.35/
- __MACOSX/Supporting INFO-14-12-2021/Input files/Gamma/ACETONE/Gamma=0.35/._acetone-G35-SOC.txt
- Supporting INFO-14-12-2021/Input files/Gamma/ACETONE/Gamma=0.40/
- Supporting INFO-14-12-2021/Input files/Gamma/ACETONE/Gamma=0.40/acetone-G40-SOC.txt
- __MACOSX/Supporting INFO-14-12-2021/Input files/Gamma/ACETONE/Gamma=0.40/
- __MACOSX/Supporting INFO-14-12-2021/Input files/Gamma/ACETONE/Gamma=0.40/._acetone-G40-SOC.txt
- Supporting INFO-14-12-2021/Input files/Gamma/ACETONE/Gamma=0.45/
- Supporting INFO-14-12-2021/Input files/Gamma/ACETONE/Gamma=0.45/acetone-G45-SOC.txt
- __MACOSX/Supporting INFO-14-12-2021/Input files/Gamma/ACETONE/Gamma=0.45/
- __MACOSX/Supporting INFO-14-12-2021/Input files/Gamma/ACETONE/Gamma=0.45/._acetone-G45-SOC.txt
- Supporting INFO-14-12-2021/Input files/Gamma/ACETONE/Gamma=0.50/
- Supporting INFO-14-12-2021/Input files/Gamma/ACETONE/Gamma=0.50/acetone-G50-SOC.txt
- __MACOSX/Supporting INFO-14-12-2021/Input files/Gamma/ACETONE/Gamma=0.50/
- __MACOSX/Supporting INFO-14-12-2021/Input files/Gamma/ACETONE/Gamma=0.50/._acetone-G50-SOC.txt
- Supporting INFO-14-12-2021/Input files/Gamma/ACETONE/Gamma=0.55/
- Supporting INFO-14-12-2021/Input files/Gamma/ACETONE/Gamma=0.55/acetone-G55-SOC.txt
- __MACOSX/Supporting INFO-14-12-2021/Input files/Gamma/ACETONE/Gamma=0.55/
- __MACOSX/Supporting INFO-14-12-2021/Input files/Gamma/ACETONE/Gamma=0.55/._acetone-G55-SOC.txt
- Supporting INFO-14-12-2021/Input files/Gamma/ACETONE/Gamma=0.60/
- Supporting INFO-14-12-2021/Input files/Gamma/ACETONE/Gamma=0.60/acetone-G60-SOC.txt
- __MACOSX/Supporting INFO-14-12-2021/Input files/Gamma/ACETONE/Gamma=0.60/
- __MACOSX/Supporting INFO-14-12-2021/Input files/Gamma/ACETONE/Gamma=0.60/._acetone-G60-SOC.txt
- Supporting INFO-14-12-2021/Input files/Gamma/ACETONE/Gamma=0.65/
- Supporting INFO-14-12-2021/Input files/Gamma/ACETONE/Gamma=0.65/acetone-G65-SOC.txt
- __MACOSX/Supporting INFO-14-12-2021/Input files/Gamma/ACETONE/Gamma=0.65/
- __MACOSX/Supporting INFO-14-12-2021/Input files/Gamma/ACETONE/Gamma=0.65/._acetone-G65-SOC.txt
- Supporting INFO-14-12-2021/Input files/Gamma/PyrDMA/
- Supporting INFO-14-12-2021/Input files/Gamma/PyrDMA/ACN/
- Supporting INFO-14-12-2021/Input files/Gamma/PyrDMA/ACN/Gamma=0.20/
- Supporting INFO-14-12-2021/Input files/Gamma/PyrDMA/ACN/Gamma=0.20/PyrDMA-CAMYLYP-ACN-G20-SOC.txt
- __MACOSX/Supporting INFO-14-12-2021/Input files/Gamma/PyrDMA/
- __MACOSX/Supporting INFO-14-12-2021/Input files/Gamma/PyrDMA/ACN/
- __MACOSX/Supporting INFO-14-12-2021/Input files/Gamma/PyrDMA/ACN/Gamma=0.20/
- __MACOSX/Supporting INFO-14-12-2021/Input files/Gamma/PyrDMA/ACN/Gamma=0.20/._PyrDMA-CAMYLYP-ACN-G20-SOC.txt
- Supporting INFO-14-12-2021/Input files/Gamma/PyrDMA/ACN/Gamma=0.25/
- Supporting INFO-14-12-2021/Input files/Gamma/PyrDMA/ACN/Gamma=0.25/PyrDMA-CAMYLYP-ACN-G25-SOC.txt
- __MACOSX/Supporting INFO-14-12-2021/Input files/Gamma/PyrDMA/ACN/Gamma=0.25/
- __MACOSX/Supporting INFO-14-12-2021/Input files/Gamma/PyrDMA/ACN/Gamma=0.25/._PyrDMA-CAMYLYP-ACN-G25-SOC.txt
- Supporting INFO-14-12-2021/Input files/Gamma/PyrDMA/ACN/Gamma=0.30/
- Supporting INFO-14-12-2021/Input files/Gamma/PyrDMA/ACN/Gamma=0.30/PyrDMA-CAMYLYP-ACN-G30-SOC.txt
- __MACOSX/Supporting INFO-14-12-2021/Input files/Gamma/PyrDMA/ACN/Gamma=0.30/
- __MACOSX/Supporting INFO-14-12-2021/Input files/Gamma/PyrDMA/ACN/Gamma=0.30/._PyrDMA-CAMYLYP-ACN-G30-SOC.txt
- Supporting INFO-14-12-2021/Input files/Gamma/PyrDMA/ACN/Gamma=0.35/
- Supporting INFO-14-12-2021/Input files/Gamma/PyrDMA/ACN/Gamma=0.35/PyrDMA-CAMYLYP-ACN-G35-SOC.txt
- __MACOSX/Supporting INFO-14-12-2021/Input files/Gamma/PyrDMA/ACN/Gamma=0.35/
- __MACOSX/Supporting INFO-14-12-2021/Input files/Gamma/PyrDMA/ACN/Gamma=0.35/._PyrDMA-CAMYLYP-ACN-G35-SOC.txt
- Supporting INFO-14-12-2021/Input files/Gamma/PyrDMA/ACN/Gamma=0.40/
- Supporting INFO-14-12-2021/Input files/Gamma/PyrDMA/ACN/Gamma=0.40/PyrDMA-CAMYLYP-ACN-G40-SOC.txt
- __MACOSX/Supporting INFO-14-12-2021/Input files/Gamma/PyrDMA/ACN/Gamma=0.40/
- __MACOSX/Supporting INFO-14-12-2021/Input files/Gamma/PyrDMA/ACN/Gamma=0.40/._PyrDMA-CAMYLYP-ACN-G40-SOC.txt
- Supporting INFO-14-12-2021/Input files/Gamma/PyrDMA/ACN/Gamma=0.45/
- Supporting INFO-14-12-2021/Input files/Gamma/PyrDMA/ACN/Gamma=0.45/PyrDMA-CAMYLYP-ACN-G45-SOC.txt
- __MACOSX/Supporting INFO-14-12-2021/Input files/Gamma/PyrDMA/ACN/Gamma=0.45/
- __MACOSX/Supporting INFO-14-12-2021/Input files/Gamma/PyrDMA/ACN/Gamma=0.45/._PyrDMA-CAMYLYP-ACN-G45-SOC.txt
- Supporting INFO-14-12-2021/Input files/Gamma/PyrDMA/ACN/Gamma=0.50/
- Supporting INFO-14-12-2021/Input files/Gamma/PyrDMA/ACN/Gamma=0.50/PyrDMA-CAMYLYP-ACN-G50-SOC.txt
- __MACOSX/Supporting INFO-14-12-2021/Input files/Gamma/PyrDMA/ACN/Gamma=0.50/
- __MACOSX/Supporting INFO-14-12-2021/Input files/Gamma/PyrDMA/ACN/Gamma=0.50/._PyrDMA-CAMYLYP-ACN-G50-SOC.txt
- Supporting INFO-14-12-2021/Input files/Gamma/PyrDMA/ACN/Gamma=0.55/
[truncated: 1,206 more entries]
