# Supplementary material for: Spin Orbit Coupling in Orthogonal Charge Transfer States: (TD-)DFT of Pyrene - Dimethylaniline
Source: Preprints.org preprint supplement (doi:10.20944/preprints202112.0109.v2), 2021-12-16
Supplement: Supplementary file 3 [file supplementary › Supporting INFO-14-12-2021/Coordinate files/4-thiothymine-B/PBE/S0/4-thio-thymine-S0-PBE.mol]

4-thio-thymine-S0-PBE
SCM ADF package: www.scm.com

 15 15  0  0  0  0  0  0  0  0999 V2000
   -2.7295    0.1413   -0.8836 H   0  0  0  0  0  0  0  0  0  0  0  0
    1.3997   -2.2941   -0.3327 H   0  0  0  0  0  0  0  0  0  0  0  0
    1.0635   -1.3426   -0.1913 N   0  0  0  0  0  0  0  0  0  0  0  0
    1.5034    0.8794    0.1382 N   0  0  0  0  0  0  0  0  0  0  0  0
   -1.0712   -2.1570   -0.3168 O   0  0  0  0  0  0  0  0  0  0  0  0
    2.1905    1.6189    0.2480 H   0  0  0  0  0  0  0  0  0  0  0  0
   -0.3410   -1.1842   -0.1717 C   0  0  0  0  0  0  0  0  0  0  0  0
   -0.7895    0.1962    0.0281 C   0  0  0  0  0  0  0  0  0  0  0  0
    0.1578    1.1566    0.1748 C   0  0  0  0  0  0  0  0  0  0  0  0
    2.0316   -0.3785   -0.0518 C   0  0  0  0  0  0  0  0  0  0  0  0
   -2.2595    0.4627    0.0569 C   0  0  0  0  0  0  0  0  0  0  0  0
   -0.0923    2.2064    0.3292 H   0  0  0  0  0  0  0  0  0  0  0  0
   -2.7433   -0.1162    0.8566 H   0  0  0  0  0  0  0  0  0  0  0  0
   -2.4685    1.5281    0.2126 H   0  0  0  0  0  0  0  0  0  0  0  0
    3.6627   -0.6699   -0.1034 S   0  0  0  0  0  0  0  0  0  0  0  0
  7  8  1  0
  8 11  1  0
  3 10  1  0
  4  9  1  0
  4 10  1  0
  4  6  1  0
  3  7  1  0
  9 12  1  0
  2  3  1  0
 11 14  1  0
 11 13  1  0
  1 11  1  0
  5  7  2  0
  8  9  2  0
 10 15  2  0
M  END
