# Supplementary material for: Spin Orbit Coupling in Orthogonal Charge Transfer States: (TD-)DFT of Pyrene - Dimethylaniline
Source: Preprints.org preprint supplement (doi:10.20944/preprints202112.0109.v2), 2021-12-16
Supplement: Supplementary file 3 [file supplementary › Supporting INFO-14-12-2021/Coordinate files/4-thiothymine-B/PBE/S1/4-thio-thymine-S1-PBE.mol]

4-thio-thymine-S1-PBE
SCM ADF package: www.scm.com

 15 15  0  0  0  0  0  0  0  0999 V2000
   -2.7707    0.2265   -0.9030 H   0  0  0  0  0  0  0  0  0  0  0  0
    1.4096   -2.2819   -0.2929 H   0  0  0  0  0  0  0  0  0  0  0  0
    1.1066   -1.3211   -0.1661 N   0  0  0  0  0  0  0  0  0  0  0  0
    1.5274    0.8924    0.1285 N   0  0  0  0  0  0  0  0  0  0  0  0
   -1.0408   -2.2108   -0.3355 O   0  0  0  0  0  0  0  0  0  0  0  0
    2.1887    1.6527    0.2045 H   0  0  0  0  0  0  0  0  0  0  0  0
   -0.4190   -1.1561   -0.1672 C   0  0  0  0  0  0  0  0  0  0  0  0
   -0.8180    0.1731    0.0269 C   0  0  0  0  0  0  0  0  0  0  0  0
    0.1181    1.2080    0.1852 C   0  0  0  0  0  0  0  0  0  0  0  0
    1.9763   -0.3374   -0.0413 C   0  0  0  0  0  0  0  0  0  0  0  0
   -2.2932    0.4748    0.0568 C   0  0  0  0  0  0  0  0  0  0  0  0
   -0.1174    2.2470    0.3754 H   0  0  0  0  0  0  0  0  0  0  0  0
   -2.8059   -0.1220    0.8252 H   0  0  0  0  0  0  0  0  0  0  0  0
   -2.4748    1.5374    0.2651 H   0  0  0  0  0  0  0  0  0  0  0  0
    3.7103   -0.7047   -0.1112 S   0  0  0  0  0  0  0  0  0  0  0  0
  5  7  2  0
  3 10  1  0
  4 10  1  0
  8 11  1  0
  7  8  1  0
  8  9  2  0
  4  6  1  0
  9 12  1  0
  2  3  1  0
 11 14  1  0
 11 13  1  0
  1 11  1  0
  4  9  1  0
  3  7  1  0
 10 15  2  0
M  END
