# Supplementary material for: Spin Orbit Coupling in Orthogonal Charge Transfer States: (TD-)DFT of Pyrene - Dimethylaniline
Source: Preprints.org preprint supplement (doi:10.20944/preprints202112.0109.v2), 2021-12-16
Supplement: Supplementary file 3 [file supplementary › Supporting INFO-14-12-2021/Coordinate files/4-thiothymine-B/PBE/S1/4-thio-thymine-S1.out]

 *******************************************************************************
 *                                                                             *
 *  -------------------------------------                                      *
 *   Amsterdam Density Functional  (ADF)         2017                          *
 *  -------------------------------------                                      *
 *                                               r58813 2017-04-12             *
 *                                                                             *
 *                                                                             *
 *                            =====================                            *
 *                            |                   |                            *
 *                            |     D I R A C     |                            *
 *                            |                   |                            *
 *                            =====================                            *
 *                                                                             *
 *                                                                             *
 *   Online information and documentation:  https://www.scm.com/support/       *
 *   E-mail:  support@scm.com   info@scm.com                                   *
 *                                                                             *
 *   Scientific publications using ADF results must be properly referenced     *
 *   See the User Manuals (or the web site) for recommended citations          *
 *   The terms and conditions of the End User License Agreement apply to       *
 *   the use of ADF, https://www.scm.com/license-terms/                        *
 *                                                                             *
 **********************  x86_64_linux_intel / intelmpi  ************************
 
 Licensed to: SURF-SARA, Comp. & Networking Services / Amsterdam / NL
 SCM User ID: u7409
  
 DIRAC 2017  RunTime: Dec09-2020 01:39:24  Nodes: 1  Procs: 1

 Temporary files are created in /scratch/kid_0.T99trW

1
 HYDROGEN ATOM RELATIVISTIC, Point Nuc, A and c from libtc   
 N J RN H ZN XION ANUC CLIGHT
 5000    1100.00000000197.36710137  1.00000000  0.00000000    1.007825  0.1370360E+03
  PH   PHI     EPS        DEL        DELRVR
  0.30  0.30     2500.00  0.00001000  0.00001000
 IDIRC  NC1  NDEBU NPRIN  IPUN IRCOR IWCOR
   1   300     0     0     0     0     0
   XALPHA      XLATTER      RNUC
  0.70000000  0.00000000  0.00000000 Point Charge
   XN   XL   XJ      XE          XZ      XDELL
  1.0  0.0  0.5      -1.000       1.000     0.00000
 ICORP=  0  NPCL=  0  DEMP=0.00  PEPS=0.000000
 R(1)=  0.1000000E-08 D=  0.1005080E+01 RNUC=  0.0000000E+00
 converged at cycle   32  DENSITY AVERAGING    0.2400
  MAXIMUM ERROR IN R.V(R) IS   0.79874357E-05
 Q,EY,EV,EZ,ESUM,ETOT,RHO  0.100000E+01 -0.266614E+00 -0.619969E+00 -0.910779E+00 -0.203940E+00 -0.415998E+00  0.337036E-17


 DIRAC CALCULATION
1                    HYDROGEN ATOM RELATIVISTIC, Point Nuc, A and c from libtc


 EXCHANGE COEFFICIENT=  0.7000000           TAIL CORRECTION=  0.           NUCLEAR RADIUS=  0.000E+00
0                       ORBITAL    N    L    J     ELECTRONS     EIGENVALUE                DELTA OF EIGENV.

                          1S1/2  1.0  0.0  0.5     1.000       -0.2039397E+00                 0.2720093E-06


                                        NUCLEAR CHARGE=    1.000000
                            INTEGRAL OF CHARGE DENSITY=    1.000000
                           SUM OF THE ORBITAL ENERGIES=     -0.2039
                                          TOTAL ENERGY=     -0.4160
                                        KINETIC ENERGY=      0.4160
                             NUCLEAR ATTRACTION ENERGY=     -0.9108
                             ELECTRON REPULSION ENERGY=      0.2787
                                       EXCHANGE ENERGY=     -0.2000

 *******************************************************************************

                             D I R A C   E X I T
 NORMAL TERMINATION


 =================
 Timing Statistics
 =================
  
 Total Used :                     CPU=        0.05      System=        0.00     Elapsed=        0.07

 Calls  Section                     ( Mean, Percentage )
 ---------------------------------------------------------------------------------------------------
     2  ><      ................      0.00    0.01             0.00    0.08             0.00    0.02
     1  EXIT PROCEDURE .........      0.05   99.99             0.00   99.92             0.07   99.98


 Currently Open Files (EXIT00)
 ====================

 Unit    Access Format  Status   Type       Ident (file)
 -------------------------------------------------------
   3      SEQ    FORM   TRANSP  NORMAL      LOGFILE
                                          ( logfile )


 Buffered I/O statistics
 =======================
 Memory available:                     67108864
 Number of records fitting in memory:     16131
 Input : 100.0% of                            0  *4k bytes
 Output: 100.0% of                            0  *4k bytes
 Records from serial files evicted:           0
                    others evicted:           0
 Hash table lookups:          0 with          0 conflicts (100.00%)
NORMAL TERMINATION

Create H   file=TZ2P-H
XC
  GGA PBE
End
relativistic ZORA
HartreeFock
Corepotentials t12.rel
End Input

 *******************************************************************************
 *                                                                             *
 *  -------------------------------------                                      *
 *   Amsterdam Density Functional  (ADF)         2017                          *
 *  -------------------------------------                                      *
 *                                               r58813 2017-04-12             *
 *                                                                             *
 *                                                                             *
 *                              =================                              *
 *                              |               |                              *
 *                              |     A D F     |                              *
 *                              |               |                              *
 *                              =================                              *
 *                                                                             *
 *                                                                             *
 *   Online information and documentation:  https://www.scm.com/support/       *
 *   E-mail:  support@scm.com   info@scm.com                                   *
 *                                                                             *
 *   Scientific publications using ADF results must be properly referenced     *
 *   See the User Manuals (or the web site) for recommended citations          *
 *   The terms and conditions of the End User License Agreement apply to       *
 *   the use of ADF, https://www.scm.com/license-terms/                        *
 *                                                                             *
 **********************  x86_64_linux_intel / intelmpi  ************************
 
 Licensed to: SURF-SARA, Comp. & Networking Services / Amsterdam / NL
 SCM User ID: u7409
  
 ADF 2017  RunTime: Dec09-2020 01:39:24  Nodes: 1  Procs: 1

 Temporary files are created in /scratch/kid_0.X0XeBh

 Hydrogen (TZ2P)


 ===========================
 A T T A C H E D   F I L E S
 ===========================
  
 CREATE - Data File:    TZ2P-H
                        Hydrogen (TZ2P)
 Core Potentials:
         file : t12.rel


 ===============================
 M O D E L   P A R A M E T E R S
 ===============================
  
 DENSITY FUNCTIONAL POTENTIAL (scf)
    LDA:                               PW92                                    == Not Default ==
    Gradient Corrections:              PBEc PBEx                               == Not Default ==

 SPIN  (restricted / unrestr.)
    Molecule:                          Restricted                               

 OTHER ASPECTS
    Relativistic Corrections:          scalar (ZORA,MAPA)                      == Not Default ==

    Nuclear Charge Density Model:      Point Charge Nuclei                      
    Core Treatment:                    Frozen Orbital(s)                        

    Hyperfine or Zeeman Interaction:   ---                                      


 =====================================
 S Y M M E T R Y ,   E L E C T R O N S
 =====================================
  
 Symmetry: ATOM

 Irreducible Representations, including subspecies
 -------------------------------------------------
 S
 P:x  P:y  P:z
 D:z2  D:x2-y2  D:xy  D:xz  D:yz
 F:z3  F:z  F:xyz  F:z2x  F:z2y  F:x  F:y


 Configuration of Valence Electrons
 ==================================

          Occupation Numbers
          -------------------------------------------------
 S        1
 P        0
 D        0
 F        0
          -------------------------------------------------

 Total:   1

 Net Charge: 0 (Nuclei minus Electrons)

 Preset values for MO occupations will be applied through SCF cycle no. 1000000
 Thereafter, the program will assign electrons to MOs that are spatially
 similar to the occupied MOs in a "reference" cycle ("KeepOrbitals").
 The reference cycle is always the PREVIOUS cycle: it will evolve with
 the SCF procedure.


 ================================
 (Slater-type)  F U N C T I O N S  ***  (Basis and Fit)  ***
 ================================
  

 Atom Type    1  (H)
 ==============

 Valence Basis Sets:   5
 -----------------------
   1 S    0.690000
   1 S    0.920000
   1 S    1.580000
   2 P    1.250000
   3 D    2.500000


 BAS: List of all Elementary Cartesian Basis Functions
 =====================================================

 The numbering in the list below (to the right of the function characteristics) is referred
 to in print-outs of MO eigenvectors and Mulliken populations in the BAS representation
 (as contrasted to the SFO representation).

 Notes:
 1. The functions are characterized by a polynomial prefactor (powers of x,y,z and r) and
    an exponential decay factor alpha.
 2. Since the basis sets are specific for an atom TYPE, the individual functions occur on
    all atoms of that type.
 3. The word 'Core' in the left margin signals that it is a Core Function (CF) : not a
    degree of freedom in the valence set, but only used to ensure orthogonalization of
    the other valence basis functions on the frozen Core Orbitals.


 (power of) X  Y  Z  R     Alpha  on Atom
            ==========     =====     ==========

 H                                    1
                                  ---------------------------------------------------------------------------
            0  0  0  0     0.690      1
            0  0  0  0     0.920      2
            0  0  0  0     1.580      3
            1  0  0  0     1.250      4
            0  1  0  0     1.250      5
            0  0  1  0     1.250      6
            2  0  0  0     2.500      7
            1  1  0  0     2.500      8
            1  0  1  0     2.500      9
            0  2  0  0     2.500     10
            0  1  1  0     2.500     11
            0  0  2  0     2.500     12

 Total number of charge fitting functions (nprimf)        50
 Total number of Cartesian basis functions (naos)         12
 Total number of Cartesian core functions  (ncos)          0


 BAS: List of all Elementary Cartesian Basis Functions
 =====================================================

 The numbering in the list below (to the right of the function characteristics) is referred
 to in print-outs of MO eigenvectors and Mulliken populations in the BAS representation
 (as contrasted to the SFO representation).

 Notes:
 1. The functions are characterized by a polynomial prefactor (powers of x,y,z and r) and
    an exponential decay factor alpha.
 2. Since the basis sets are specific for an atom TYPE, the individual functions occur on
    all atoms of that type.
 3. The word 'Core' in the left margin signals that it is a Core Function (CF) : not a
    degree of freedom in the valence set, but only used to ensure orthogonalization of
    the other valence basis functions on the frozen Core Orbitals.


 (power of) X  Y  Z  R     Alpha  on Atom
            ==========     =====     ==========

 H                                    1
                                  ---------------------------------------------------------------------------
            0  0  0  0     0.690      1
            0  0  0  0     0.920      2
            0  0  0  0     1.580      3
            1  0  0  0     1.250      4
            0  1  0  0     1.250      5
            0  0  1  0     1.250      6
            2  0  0  0     2.500      7
            1  1  0  0     2.500      8
            1  0  1  0     2.500      9
            0  2  0  0     2.500     10
            0  1  1  0     2.500     11
            0  0  2  0     2.500     12
1
 ***************************************************************************************************


                                              ***********************
                                              *  T E C H N I C A L  *
                                              ***********************
  


 =============================================================
 P A R A L L E L I Z A T I O N  and  V E C T O R I Z A T I O N
 =============================================================
  
 Nr of parallel processes:                                1
 Maximum vector length in NumInt loops:                 128

 IO buffersize (Mb):                                     64.000000


 =====================
 S C F   U P D A T E S
 =====================
  
 Max. nr. of cycles:                               300
 Convergence criterion:                              0.0000000100
   secondary criterion:                              0.0000000100

 Mix parameter (when DIIS does not apply):           0.2000000000
 Special mix parameter for the first cycle:          1.0000000000
 Mixed ADIIS+DIIS will be used
    Max number of expansion vectors:                10
    Pure ADIIS when Max([F,P]) is above              0.1000000000
    Pure DIIS when Max([F,P]) is below               0.0010000000
 Automatic ElectronSmearing (in case of problematic SCF convergence) disabled


 =================
 P R E C I S I O N  ***  (General: NumInt, NeglectFunctionTails, ...)  ***
 =================
  

 NumInt:           Target precision:                12.0000000000
 -------           Initial precision:               10.0000000000
                   Min. precision (optimization):   10.0000000000

 Neglect Functions:          Basis functions:        0.1000000000E-13
 ------------------          Fit functions:          0.1000000000E-13


 ===========================
 L I N E A R   S C A L I N G
 ===========================
  

 Cut-off radii density fit:                        0.1000000000E-97
 Overlap cut-off criterion AO matrix elements:     0.1000000000E-97
 Cut-offs for Coulomb potential and fitted density:0.1000000000E-97
 Cut-off criterion for Coulomb multipole terms:    0.1000000000E-97
 Progressive Convergence parameter:                 0.000000000    
1
 ***************************************************************************************************


                                            ***************************
                                            *  C O M P U T A T I O N  *
                                            ***************************
  

 Number of elements of the density matrix on this node (used, total):        78        78


 ===========================================
 Numerical Integration : Fuzzy Cells (Becke)
 ===========================================
  
 Becke grid quality: VERYGOOD       
  
 Lebedev angular grid order:             min:  13 max:  41
 Nr. of radial points:                   min:  64 max:  64

 Total nr. of points:         64
 Nr. of blocks:                1
 Block length:                64
 Nr. of dummy points:          0


 Test of Precision of the Numerical Integration Grid
 ===================================================

 Integral of the Total Core Density:                   0.00000000000000


 ========================
 Density Fitting (zlmFit)
 ========================
  
 ZlmFit Fit Quality: VERYGOOD       
  
 Max L-expansion:                        min:   0 max:   0
 Nr. of radial interpolation points:     min: 130 max: 130


 =====
 S C F  ***  ScaSCF  ***
 =====
  

 CYCLE    1
 SCF Error: norm([F,P])=      0.000000000000, max([F,P])=      0.000000000000
 orbitals (Q,E):
 ---------------
 S :1...3            ( 1.00    -0.5000)  ( 0.00    -0.0900)  ( 0.00     1.2936)
 P :1...1            ( 0.00     0.1562)
 D :1...1            ( 0.00     2.2914)

 CYCLE    2
 SCF Error: norm([F,P])=      0.031550472103, max([F,P])=      0.030121296888
 orbitals (Q,E):
 ---------------
 S :1...2            ( 1.00    -0.2218)  ( 0.00     0.1019)
 P :1...1            ( 0.00     0.4189)
 D :1...1            ( 0.00     2.5824)

 CYCLE    3
  SDIIS (wt  0.000):  0.1996  0.8004
 A-DIIS (wt  1.000):  0.0000  1.0000
  DIIS coefficients:  0.0000  1.0000
 SCF Error: norm([F,P])=      0.008620363195, max([F,P])=      0.008345718591
 orbitals (Q,E):
 ---------------
 S :1...2            ( 1.00    -0.2422)  ( 0.00     0.0889)
 P :1...1            ( 0.00     0.4024)
 D :1...1            ( 0.00     2.5619)

 CYCLE    4
  SDIIS (wt  0.993):  0.1666  0.8334
 A-DIIS (wt  0.007):  0.0000  1.0000
  DIIS coefficients:  0.1654  0.8346
 SCF Error: norm([F,P])=      0.001733197582, max([F,P])=      0.001719525172
 orbitals (Q,E):
 ---------------
 S :1...2            ( 1.00    -0.2386)  ( 0.00     0.0908)
 P :1...1            ( 0.00     0.4054)
 D :1...1            ( 0.00     2.5657)

 CYCLE    5
  SDIIS (wt  1.000):  0.0236  0.9764
  DIIS coefficients:  0.0236  0.9764
 SCF Error: norm([F,P])=      0.000043722685, max([F,P])=      0.000039815539
 orbitals (Q,E):
 ---------------
 S :1...2            ( 1.00    -0.2386)  ( 0.00     0.0908)
 P :1...1            ( 0.00     0.4054)
 D :1...1            ( 0.00     2.5656)

 CYCLE    6
  SDIIS (wt  1.000): -0.0578  1.0578
  DIIS coefficients: -0.0578  1.0578
 SCF Error: norm([F,P])=      0.000002387703, max([F,P])=      0.000002161666
 orbitals (Q,E):
 ---------------
 S :1...2            ( 1.00    -0.2386)  ( 0.00     0.0908)
 P :1...1            ( 0.00     0.4054)
 D :1...1            ( 0.00     2.5656)

 CYCLE    7
  SDIIS (wt  1.000): -0.0032  1.0032
  DIIS coefficients: -0.0032  1.0032
 SCF Error: norm([F,P])=      0.000000007756, max([F,P])=      0.000000007262
 orbitals (Q,E):
 ---------------
 S :1...2            ( 1.00    -0.2386)  ( 0.00     0.0908)
 P :1...1            ( 0.00     0.4054)
 D :1...1            ( 0.00     2.5656)

 SCF CONVERGED

 CYCLE    8
1
 ***************************************************************************************************


                                                *******************
                                                *  R E S U L T S  *
                                                *******************
  
  
 Hartree-Fock exchange energy:  -0.144886863649891     
 *** Setting up for NEW gradients in Focky
 *** Using FIT density in Focky

 Scaled ZORA Orbital Energies, per Irrep and Spin:
 =================================================
                        Occup              E (au)              E (eV)       Diff (eV) with prev. cycle
                        -----      --------------------        ------       --------------------------
 S
               1        1.000     -0.23862975420190E+00        -6.493               7.48E-09
               2        0.000      0.90763523721255E-01         2.470
               3        0.000      0.15217347450009E+01        41.409
 P
               1        0.000      0.40536414462565E+00        11.031
 D
               1        0.000      0.25655939238649E+01        69.813


 Partially Occupied:
               1 S                -0.23862975420190E+00
  
 LUMO :        2 S                 0.90763523721255E-01
  


 Orbital Energies, all Irreps
 ========================================

 Irrep        no.  (spin)   Occup              E (au)                E (eV)
 ---------------------------------------------------------------------------
 S             1             1.00       -0.23862975420190E+00        -6.4934
 S             2             0.00        0.90763523721255E-01         2.4698
 P             1             0.00        0.40536414462565E+00        11.0305
 S             3             0.00        0.15217347450009E+01        41.4085
 D             1             0.00        0.25655939238649E+01        69.8134


 All Electron Calculation, thus no Orbital Energies of the Core Orbitals are calculated


 =======================================
 M U L L I K E N   P O P U L A T I O N S
 =======================================
  
 The survey below gives for each atom:
 a) the total charge (Z minus electrons)
 b) the net spin polarization (nr of electrons spin-A minus spin-B)
 c) for each spin the atomic electron valence density (integrated) per L-value.

 Atom              Charge    Spin density          S         P         D         F
 ----              ------    ------------       ------    ------    ------    ------
 1 H              -0.0000                       1.0000    0.0000    0.0000    0.0000

 Populations of individual BAS functions
 ----------------------------------------
 1 H            0.2107  0.6786  0.1108  0.0000  0.0000  0.0000  0.0000  0.0000  0.0000  0.0000
                0.0000  0.0000

 Gross Charges per Atom (Z minus electrons)
 ==========================================
            -0.0000
 Net Total: -0.00000000


 =======================================================================
 Electrostatic potential at the Nuclei due to electrons and other nuclei
 =======================================================================
  
         Atom                  Potential
         ----                  ---------
     1)   H                   0.94465291
 
 
 ========================
 No memory problems found
 ========================
 
 Maximum number of active allocate calls:         382
 
 *******************************************************************************

                             A D F   E X I T
 NORMAL TERMINATION


 =================
 Timing Statistics
 =================
  
 Total Used :                     CPU=        0.21      System=        0.02     Elapsed=        0.31

 Calls  Section                     ( Mean, Percentage )
 ---------------------------------------------------------------------------------------------------
     3  ><      ................      0.00    0.48             0.00    0.04             0.00    1.05
     1  INIT    ................      0.01    2.98             0.02   78.20             0.06   19.34
     1  GEOMET  ................      0.01    4.34             0.00    7.25             0.02    5.42
     1  INPUTA  ................      0.00    0.98             0.00    0.00             0.00    0.87
     1  MAINSY  ................      0.01    3.14             0.00    0.00             0.01    3.97
     1  SYMFIT  ................      0.00    0.46             0.00    0.00             0.00    0.31
     1  CORORT  ................      0.00    0.20             0.00    0.00             0.00    0.57
     1  SYMORB  ................      0.00    0.37             0.00    0.00             0.00    0.25
     1  FITINT  ................      0.01    2.99             0.00    0.00             0.01    2.53
     1  CLSMAT  ................      0.00    0.14             0.00    0.00             0.00    0.43
     1  ORTHON  ................      0.00    0.53             0.00    0.00             0.00    0.69
     1  GENPT   ................      0.01    2.96             0.00    0.00             0.01    2.80
     1  PTBAS   ................      0.00    1.63             0.00    0.00             0.00    1.50
     8  FOCKY   ................      0.02   61.36             0.00    7.28             0.02   42.62
     8  FOCKTR  ................      0.00    1.49             0.00    2.64             0.00    1.18
     8  SDIIS   ................      0.00    3.67             0.00    4.57             0.00    6.68
     1  COREPS  ................      0.01    4.65             0.00    0.00             0.01    3.13
     1  POPAN   ................      0.00    1.29             0.00    0.00             0.00    1.32
     1  DEBYE   ................      0.00    0.20             0.00    0.00             0.00    0.48
     1  EXIT PROCEDURE .........      0.01    6.15             0.00    0.00             0.02    4.86


 Currently Open Files (EXIT00)
 ====================

 Unit    Access Format  Status   Type       Ident (file)
 -------------------------------------------------------
   3      SEQ    FORM   TRANSP  NORMAL      LOGFILE
                                          ( logfile )


 Buffered I/O statistics
 =======================
 Memory available:                     67108864
 Number of records fitting in memory:     16131
 Input :   0.2% of                        19554  *4k bytes
 Output:  17.6% of                         1157  *4k bytes
 Records from serial files evicted:           0
                    others evicted:           0
 Hash table lookups:      50265 with          0 conflicts (  0.00%)

 ***************************************************************************************************
 (LOGFILE)
 <Dec09-2020> <01:39:24>  DIRAC 2017  RunTime: Dec09-2020 01:39:24  Nodes: 1  Procs: 1
 <Dec09-2020> <01:39:24>  NORMAL TERMINATION
 <Dec09-2020> <01:39:24>  END
 <Dec09-2020> <01:39:24>  ADF 2017  RunTime: Dec09-2020 01:39:24  Nodes: 1  Procs: 1
 <Dec09-2020> <01:39:24>  Hydrogen (TZ2P)
 <Dec09-2020> <01:39:24>  RunType   : CREATE
 <Dec09-2020> <01:39:24>  Net Charge: 0 (Nuclei minus Electrons)
 <Dec09-2020> <01:39:24>  Symmetry  : ATOM
  Coordinates
    Atom         X           Y           Z   (Angstrom)
    1.H         0.000000    0.000000    0.000000
 <Dec09-2020> <01:39:24>  >>>> CORORT
 <Dec09-2020> <01:39:24>  >>>> FITINT
 <Dec09-2020> <01:39:24>  >>>> CLSMAT
 <Dec09-2020> <01:39:24>  >>>> ORTHON
 <Dec09-2020> <01:39:24>  >>>> GENPT
 <Dec09-2020> <01:39:24>  Block Length=  64
 <Dec09-2020> <01:39:24>  >>>> PTBAS
 <Dec09-2020> <01:39:24>  >>>> CYCLE
 <Dec09-2020> <01:39:24>              |Error|         MaxErr       Wt(A-DIIS)
 <Dec09-2020> <01:39:24>      1      0.00000000      0.00000000
 <Dec09-2020> <01:39:24>      2      0.03155047      0.03012130
 <Dec09-2020> <01:39:24>      3      0.00862036      0.00834572    100.0
 <Dec09-2020> <01:39:24>      4      0.00173320      0.00171953      0.7
 <Dec09-2020> <01:39:24>      5      0.00004372      0.00003982      0.0
 <Dec09-2020> <01:39:24>      6      0.00000239      0.00000216      0.0
 <Dec09-2020> <01:39:24>      7      0.00000001      0.00000001      0.0
 <Dec09-2020> <01:39:24>  SCF converged
 <Dec09-2020> <01:39:24>      8      0.00000000      0.00000000      0.0
 <Dec09-2020> <01:39:24>  >>>> POPAN
 <Dec09-2020> <01:39:24>  >>>> DEBYE
 <Dec09-2020> <01:39:24>  NORMAL TERMINATION
 <Dec09-2020> <01:39:24>  END
NORMAL TERMINATION

 *******************************************************************************
 *                                                                             *
 *  -------------------------------------                                      *
 *   Amsterdam Density Functional  (ADF)         2017                          *
 *  -------------------------------------                                      *
 *                                               r58813 2017-04-12             *
 *                                                                             *
 *                                                                             *
 *                            =====================                            *
 *                            |                   |                            *
 *                            |     D I R A C     |                            *
 *                            |                   |                            *
 *                            =====================                            *
 *                                                                             *
 *                                                                             *
 *   Online information and documentation:  https://www.scm.com/support/       *
 *   E-mail:  support@scm.com   info@scm.com                                   *
 *                                                                             *
 *   Scientific publications using ADF results must be properly referenced     *
 *   See the User Manuals (or the web site) for recommended citations          *
 *   The terms and conditions of the End User License Agreement apply to       *
 *   the use of ADF, https://www.scm.com/license-terms/                        *
 *                                                                             *
 **********************  x86_64_linux_intel / intelmpi  ************************
 
 Licensed to: SURF-SARA, Comp. & Networking Services / Amsterdam / NL
 SCM User ID: u7409
  
 DIRAC 2017  RunTime: Dec09-2020 01:39:24  Nodes: 1  Procs: 1

 Temporary files are created in /scratch/kid_0.5uIhGJ

1
 NITROGEN ATOM all electron RELATIVISTIC, Point Nuc, A and c 
 N J RN H ZN XION ANUC CLIGHT
 5000    4100.00000000197.36710137  7.00000000  0.00000000   14.003074  0.1370360E+03
  PH   PHI     EPS        DEL        DELRVR
  0.30  0.30     2500.00  0.00001000  0.00001000
 IDIRC  NC1  NDEBU NPRIN  IPUN IRCOR IWCOR
   1   300     0     0     0     0     0
   XALPHA      XLATTER      RNUC
  0.70000000  0.00000000  0.00000000 Point Charge
   XN   XL   XJ      XE          XZ      XDELL
  1.0  0.0  0.5      -5.000       2.000     0.00000
  2.0  0.0  0.5      -1.000       2.000     0.00000
  2.0  1.0  0.5      -1.000       2.000     0.00000
  2.0  1.0  1.5      -1.000       1.000     0.00000
 ICORP=  0  NPCL=  0  DEMP=0.00  PEPS=0.000000
 R(1)=  0.1000000E-08 D=  0.1005080E+01 RNUC=  0.0000000E+00
 converged at cycle   25  DENSITY AVERAGING    0.3000
  MAXIMUM ERROR IN R.V(R) IS   0.97905511E-05
 Q,EY,EV,EZ,ESUM,ETOT,RHO  0.700000E+01 -0.796419E+01 -0.840156E+02 -0.127663E+03 -0.300692E+02 -0.538837E+02  0.270066E-14


 DIRAC CALCULATION
1                    NITROGEN ATOM all electron RELATIVISTIC, Point Nuc, A and c from libtc


 EXCHANGE COEFFICIENT=  0.7000000           TAIL CORRECTION=  0.           NUCLEAR RADIUS=  0.000E+00
0                       ORBITAL    N    L    J     ELECTRONS     EIGENVALUE                DELTA OF EIGENV.

                          1S1/2  1.0  0.0  0.5     2.000       -0.1403720E+02                 0.4993583E-04
                          2S1/2  2.0  0.0  0.5     2.000       -0.6456810E+00                 0.6544571E-05
                          2P1/2  2.0  1.0  0.5     2.000       -0.2347008E+00                 0.5687228E-05
                          2P3/2  2.0  1.0  1.5     1.000       -0.2339893E+00                 0.5679256E-05


                                        NUCLEAR CHARGE=    7.000000
                            INTEGRAL OF CHARGE DENSITY=    7.000000
                           SUM OF THE ORBITAL ENERGIES=    -30.0692
                                          TOTAL ENERGY=    -53.8837
                                        KINETIC ENERGY=     53.9465
                             NUCLEAR ATTRACTION ENERGY=   -127.6627
                             ELECTRON REPULSION ENERGY=     25.8056
                                       EXCHANGE ENERGY=     -5.9731

 *******************************************************************************

                             D I R A C   E X I T
 NORMAL TERMINATION


 =================
 Timing Statistics
 =================
  
 Total Used :                     CPU=        0.06      System=        0.01     Elapsed=        0.08

 Calls  Section                     ( Mean, Percentage )
 ---------------------------------------------------------------------------------------------------
     2  ><      ................      0.00    0.00             0.00    0.10             0.00    0.01
     1  EXIT PROCEDURE .........      0.06  100.00             0.01   99.90             0.08   99.99


 Currently Open Files (EXIT00)
 ====================

 Unit    Access Format  Status   Type       Ident (file)
 -------------------------------------------------------
   3      SEQ    FORM   TRANSP  NORMAL      LOGFILE
                                          ( logfile )


 Buffered I/O statistics
 =======================
 Memory available:                     67108864
 Number of records fitting in memory:     16131
 Input : 100.0% of                            0  *4k bytes
 Output: 100.0% of                            0  *4k bytes
 Records from serial files evicted:           0
                    others evicted:           0
 Hash table lookups:          0 with          0 conflicts (100.00%)
NORMAL TERMINATION

Create N   file=TZ2P-N
XC
  GGA PBE
End
relativistic ZORA
HartreeFock
Corepotentials t12.rel
End Input

 *******************************************************************************
 *                                                                             *
 *  -------------------------------------                                      *
 *   Amsterdam Density Functional  (ADF)         2017                          *
 *  -------------------------------------                                      *
 *                                               r58813 2017-04-12             *
 *                                                                             *
 *                                                                             *
 *                              =================                              *
 *                              |               |                              *
 *                              |     A D F     |                              *
 *                              |               |                              *
 *                              =================                              *
 *                                                                             *
 *                                                                             *
 *   Online information and documentation:  https://www.scm.com/support/       *
 *   E-mail:  support@scm.com   info@scm.com                                   *
 *                                                                             *
 *   Scientific publications using ADF results must be properly referenced     *
 *   See the User Manuals (or the web site) for recommended citations          *
 *   The terms and conditions of the End User License Agreement apply to       *
 *   the use of ADF, https://www.scm.com/license-terms/                        *
 *                                                                             *
 **********************  x86_64_linux_intel / intelmpi  ************************
 
 Licensed to: SURF-SARA, Comp. & Networking Services / Amsterdam / NL
 SCM User ID: u7409
  
 ADF 2017  RunTime: Dec09-2020 01:39:25  Nodes: 1  Procs: 1

 Temporary files are created in /scratch/kid_0.7w0NVK

 Nitrogen (TZ2P)


 ===========================
 A T T A C H E D   F I L E S
 ===========================
  
 CREATE - Data File:    TZ2P-N
                        Nitrogen (TZ2P)
 Core Potentials:
         file : t12.rel


 ===============================
 M O D E L   P A R A M E T E R S
 ===============================
  
 DENSITY FUNCTIONAL POTENTIAL (scf)
    LDA:                               PW92                                    == Not Default ==
    Gradient Corrections:              PBEc PBEx                               == Not Default ==

 SPIN  (restricted / unrestr.)
    Molecule:                          Restricted                               

 OTHER ASPECTS
    Relativistic Corrections:          scalar (ZORA,MAPA)                      == Not Default ==

    Nuclear Charge Density Model:      Point Charge Nuclei                      
    Core Treatment:                    Frozen Orbital(s)                        

    Hyperfine or Zeeman Interaction:   ---                                      


 =====================================
 S Y M M E T R Y ,   E L E C T R O N S
 =====================================
  
 Symmetry: ATOM

 Irreducible Representations, including subspecies
 -------------------------------------------------
 S
 P:x  P:y  P:z
 D:z2  D:x2-y2  D:xy  D:xz  D:yz
 F:z3  F:z  F:xyz  F:z2x  F:z2y  F:x  F:y


 Configuration of Valence Electrons
 ==================================

          Occupation Numbers
          -------------------------------------------------
 S        2*2
 P        3
 D        0
 F        0
          -------------------------------------------------

 Total:   7

 Net Charge: 0 (Nuclei minus Electrons)

 Preset values for MO occupations will be applied through SCF cycle no. 1000000
 Thereafter, the program will assign electrons to MOs that are spatially
 similar to the occupied MOs in a "reference" cycle ("KeepOrbitals").
 The reference cycle is always the PREVIOUS cycle: it will evolve with
 the SCF procedure.


 ================================
 (Slater-type)  F U N C T I O N S  ***  (Basis and Fit)  ***
 ================================
  

 Atom Type    1  (N)
 ==============

 Valence Basis Sets:  10
 -----------------------
   1 S    8.740000
   1 S    5.900000
   2 S    5.150000
   2 S    2.500000
   2 S    1.500000
   2 P    3.680000
   2 P    1.880000
   2 P    1.000000
   3 D    2.200000
   4 F    3.300000


 BAS: List of all Elementary Cartesian Basis Functions
 =====================================================

 The numbering in the list below (to the right of the function characteristics) is referred
 to in print-outs of MO eigenvectors and Mulliken populations in the BAS representation
 (as contrasted to the SFO representation).

 Notes:
 1. The functions are characterized by a polynomial prefactor (powers of x,y,z and r) and
    an exponential decay factor alpha.
 2. Since the basis sets are specific for an atom TYPE, the individual functions occur on
    all atoms of that type.
 3. The word 'Core' in the left margin signals that it is a Core Function (CF) : not a
    degree of freedom in the valence set, but only used to ensure orthogonalization of
    the other valence basis functions on the frozen Core Orbitals.


 (power of) X  Y  Z  R     Alpha  on Atom
            ==========     =====     ==========

 N                                    1
                                  ---------------------------------------------------------------------------
            0  0  0  0     8.740      1
            0  0  0  0     5.900      2
            0  0  0  1     5.150      3
            0  0  0  1     2.500      4
            0  0  0  1     1.500      5
            1  0  0  0     3.680      6
            0  1  0  0     3.680      7
            0  0  1  0     3.680      8
            1  0  0  0     1.880      9
            0  1  0  0     1.880     10
            0  0  1  0     1.880     11
            1  0  0  0     1.000     12
            0  1  0  0     1.000     13
            0  0  1  0     1.000     14
            2  0  0  0     2.200     15
            1  1  0  0     2.200     16
            1  0  1  0     2.200     17
            0  2  0  0     2.200     18
            0  1  1  0     2.200     19
            0  0  2  0     2.200     20
            3  0  0  0     3.300     21
            2  1  0  0     3.300     22
            2  0  1  0     3.300     23
            1  2  0  0     3.300     24
            1  1  1  0     3.300     25
            1  0  2  0     3.300     26
            0  3  0  0     3.300     27
            0  2  1  0     3.300     28
            0  1  2  0     3.300     29
            0  0  3  0     3.300     30

 Total number of charge fitting functions (nprimf)        84
 Total number of Cartesian basis functions (naos)         30
 Total number of Cartesian core functions  (ncos)          0


 BAS: List of all Elementary Cartesian Basis Functions
 =====================================================

 The numbering in the list below (to the right of the function characteristics) is referred
 to in print-outs of MO eigenvectors and Mulliken populations in the BAS representation
 (as contrasted to the SFO representation).

 Notes:
 1. The functions are characterized by a polynomial prefactor (powers of x,y,z and r) and
    an exponential decay factor alpha.
 2. Since the basis sets are specific for an atom TYPE, the individual functions occur on
    all atoms of that type.
 3. The word 'Core' in the left margin signals that it is a Core Function (CF) : not a
    degree of freedom in the valence set, but only used to ensure orthogonalization of
    the other valence basis functions on the frozen Core Orbitals.


 (power of) X  Y  Z  R     Alpha  on Atom
            ==========     =====     ==========

 N                                    1
                                  ---------------------------------------------------------------------------
            0  0  0  0     8.740      1
            0  0  0  0     5.900      2
            0  0  0  1     5.150      3
            0  0  0  1     2.500      4
            0  0  0  1     1.500      5
            1  0  0  0     3.680      6
            0  1  0  0     3.680      7
            0  0  1  0     3.680      8
            1  0  0  0     1.880      9
            0  1  0  0     1.880     10
            0  0  1  0     1.880     11
            1  0  0  0     1.000     12
            0  1  0  0     1.000     13
            0  0  1  0     1.000     14
            2  0  0  0     2.200     15
            1  1  0  0     2.200     16
            1  0  1  0     2.200     17
            0  2  0  0     2.200     18
            0  1  1  0     2.200     19
            0  0  2  0     2.200     20
            3  0  0  0     3.300     21
            2  1  0  0     3.300     22
            2  0  1  0     3.300     23
            1  2  0  0     3.300     24
            1  1  1  0     3.300     25
            1  0  2  0     3.300     26
            0  3  0  0     3.300     27
            0  2  1  0     3.300     28
            0  1  2  0     3.300     29
            0  0  3  0     3.300     30
1
 ***************************************************************************************************


                                              ***********************
                                              *  T E C H N I C A L  *
                                              ***********************
  


 =============================================================
 P A R A L L E L I Z A T I O N  and  V E C T O R I Z A T I O N
 =============================================================
  
 Nr of parallel processes:                                1
 Maximum vector length in NumInt loops:                 128

 IO buffersize (Mb):                                     64.000000


 =====================
 S C F   U P D A T E S
 =====================
  
 Max. nr. of cycles:                               300
 Convergence criterion:                              0.0000000100
   secondary criterion:                              0.0000000100

 Mix parameter (when DIIS does not apply):           0.2000000000
 Special mix parameter for the first cycle:          1.0000000000
 Mixed ADIIS+DIIS will be used
    Max number of expansion vectors:                10
    Pure ADIIS when Max([F,P]) is above              0.1000000000
    Pure DIIS when Max([F,P]) is below               0.0010000000
 Automatic ElectronSmearing (in case of problematic SCF convergence) disabled


 =================
 P R E C I S I O N  ***  (General: NumInt, NeglectFunctionTails, ...)  ***
 =================
  

 NumInt:           Target precision:                12.0000000000
 -------           Initial precision:               10.0000000000
                   Min. precision (optimization):   10.0000000000

 Neglect Functions:          Basis functions:        0.1000000000E-13
 ------------------          Fit functions:          0.1000000000E-13


 ===========================
 L I N E A R   S C A L I N G
 ===========================
  

 Cut-off radii density fit:                        0.1000000000E-97
 Overlap cut-off criterion AO matrix elements:     0.1000000000E-97
 Cut-offs for Coulomb potential and fitted density:0.1000000000E-97
 Cut-off criterion for Coulomb multipole terms:    0.1000000000E-97
 Progressive Convergence parameter:                 0.000000000    
1
 ***************************************************************************************************


                                            ***************************
                                            *  C O M P U T A T I O N  *
                                            ***************************
  

 Number of elements of the density matrix on this node (used, total):       465       465


 ===========================================
 Numerical Integration : Fuzzy Cells (Becke)
 ===========================================
  
 Becke grid quality: VERYGOOD       
  
 Lebedev angular grid order:             min:  13 max:  41
 Nr. of radial points:                   min:  72 max:  72

 Total nr. of points:         72
 Nr. of blocks:                1
 Block length:                72
 Nr. of dummy points:          0


 Test of Precision of the Numerical Integration Grid
 ===================================================

 Integral of the Total Core Density:                   0.00000000000000


 ========================
 Density Fitting (zlmFit)
 ========================
  
 ZlmFit Fit Quality: VERYGOOD       
  
 Max L-expansion:                        min:   0 max:   0
 Nr. of radial interpolation points:     min: 160 max: 160


 =====
 S C F  ***  ScaSCF  ***
 =====
  

 CYCLE    1
 SCF Error: norm([F,P])=      0.000000000000, max([F,P])=      0.000000000000
 orbitals (Q,E):
 ---------------
 S :1...5            ( 2.00   -24.5085)  ( 2.00    -6.1038)  ( 0.00    -2.6609)  ( 0.00     0.7130)
                     ( 0.00    53.9524)
 P :1...3            ( 3.00    -6.1221)  ( 0.00    -2.6449)  ( 0.00    -1.4094)
 D :1...1            ( 0.00    -2.7133)
 F :1...1            ( 0.00    -0.3303)

 CYCLE    2
  SDIIS (wt  0.000):  1.0000  0.0000
 A-DIIS (wt  1.000):  0.0000  1.0000
  DIIS coefficients:  0.0000  1.0000
 SCF Error: norm([F,P])=      6.477200927757, max([F,P])=      4.240068106558
 orbitals (Q,E):
 ---------------
 S :1...3            ( 2.00   -10.8121)  ( 2.00    -0.0020)  ( 0.00     1.2159)
 P :1...2            ( 3.00     0.2049)  ( 0.00     0.9722)
 D :1...1            ( 0.00     1.8344)
 F :1...1            ( 0.00     4.7205)

 CYCLE    3
  SDIIS (wt  0.000):  0.2197  0.7803
 A-DIIS (wt  1.000):  0.2092  0.7908
  DIIS coefficients:  0.2092  0.7908
 SCF Error: norm([F,P])=      2.468008167944, max([F,P])=      1.948125474059
 orbitals (Q,E):
 ---------------
 S :1...3            ( 2.00   -15.1559)  ( 2.00    -1.2433)  ( 0.00     0.2076)
 P :1...2            ( 3.00    -0.8295)  ( 0.00     0.0832)
 D :1...1            ( 0.00     0.8020)
 F :1...1            ( 0.00     3.4981)

 CYCLE    4
  SDIIS (wt  0.000): -0.0644  0.1977  0.8667
 A-DIIS (wt  1.000):  0.0000  0.0505  0.9495
  DIIS coefficients:  0.0000  0.0505  0.9495
 SCF Error: norm([F,P])=      1.009799842415, max([F,P])=      0.662187780833
 orbitals (Q,E):
 ---------------
 S :1...3            ( 2.00   -13.4841)  ( 2.00    -0.4592)  ( 0.00     0.6722)
 P :1...2            ( 3.00    -0.0644)  ( 0.00     0.4231)
 D :1...1            ( 0.00     1.4156)
 F :1...1            ( 0.00     4.2100)

 CYCLE    5
  SDIIS (wt  0.000): -0.0248 -0.0769  0.4604  0.6412
 A-DIIS (wt  1.000):  0.0000  0.0000  0.4250  0.5750
  DIIS coefficients:  0.0000  0.0000  0.4250  0.5750
 SCF Error: norm([F,P])=      0.788461240439, max([F,P])=      0.542264435810
 orbitals (Q,E):
 ---------------
 S :1...3            ( 2.00   -14.2068)  ( 2.00    -0.7293)  ( 0.00     0.4914)
 P :1...2            ( 3.00    -0.3043)  ( 0.00     0.2675)
 D :1...1            ( 0.00     1.2034)
 F :1...1            ( 0.00     3.9589)

 CYCLE    6
  SDIIS (wt  0.481):  0.0018 -0.0078 -0.0289  0.0994  0.9355
 A-DIIS (wt  0.519):  0.0000  0.0000  0.0000  0.0000  1.0000
  DIIS coefficients:  0.0009 -0.0038 -0.0139  0.0479  0.9690
 SCF Error: norm([F,P])=      0.088872112622, max([F,P])=      0.052346041089
 orbitals (Q,E):
 ---------------
 S :1...3            ( 2.00   -14.0913)  ( 2.00    -0.6646)  ( 0.00     0.5325)
 P :1...2            ( 3.00    -0.2429)  ( 0.00     0.2953)
 D :1...1            ( 0.00     1.2570)
 F :1...1            ( 0.00     4.0201)

 CYCLE    7
  SDIIS (wt  0.635): -0.0003  0.0023  0.0240 -0.0632 -0.0598  1.0970
 A-DIIS (wt  0.365):  0.0000  0.0000  0.0000  0.0000  0.2257  0.7743
  DIIS coefficients: -0.0002  0.0014  0.0152 -0.0401  0.0444  0.9793
 SCF Error: norm([F,P])=      0.055954929761, max([F,P])=      0.037126003263
 orbitals (Q,E):
 ---------------
 S :1...3            ( 2.00   -14.1439)  ( 2.00    -0.6864)  ( 0.00     0.5189)
 P :1...2            ( 3.00    -0.2636)  ( 0.00     0.2849)
 D :1...1            ( 0.00     1.2402)
 F :1...1            ( 0.00     4.0004)

 CYCLE    8
  SDIIS (wt  0.953): -0.0001  0.0002  0.0015 -0.0040  0.0045  0.1948  0.8031
 A-DIIS (wt  0.047):  0.0000  0.0000  0.0000  0.0000  0.0000  0.0000  1.0000
  DIIS coefficients: -0.0001  0.0002  0.0014 -0.0038  0.0042  0.1856  0.8124
 SCF Error: norm([F,P])=      0.008366940850, max([F,P])=      0.005695204848
 orbitals (Q,E):
 ---------------
 S :1...3            ( 2.00   -14.1366)  ( 2.00    -0.6836)  ( 0.00     0.5207)
 P :1...2            ( 3.00    -0.2609)  ( 0.00     0.2862)
 D :1...1            ( 0.00     1.2423)
 F :1...1            ( 0.00     4.0029)

 CYCLE    9
  SDIIS (wt  1.000): -0.0000 -0.0000  0.0000  0.0001  0.0001 -0.0061  0.0077  0.9982
  DIIS coefficients: -0.0000 -0.0000  0.0000  0.0001  0.0001 -0.0061  0.0077  0.9982
 SCF Error: norm([F,P])=      0.000344394464, max([F,P])=      0.000230234212
 orbitals (Q,E):
 ---------------
 S :1...3            ( 2.00   -14.1369)  ( 2.00    -0.6837)  ( 0.00     0.5206)
 P :1...2            ( 3.00    -0.2610)  ( 0.00     0.2861)
 D :1...1            ( 0.00     1.2422)
 F :1...1            ( 0.00     4.0028)

 CYCLE   10
  SDIIS (wt  1.000): -0.0000  0.0000  0.0000 -0.0000 -0.0004 -0.0015  0.0203  0.9816
  DIIS coefficients: -0.0000  0.0000  0.0000 -0.0000 -0.0004 -0.0015  0.0203  0.9816
 SCF Error: norm([F,P])=      0.000004011416, max([F,P])=      0.000002381489
 orbitals (Q,E):
 ---------------
 S :1...3            ( 2.00   -14.1369)  ( 2.00    -0.6837)  ( 0.00     0.5206)
 P :1...2            ( 3.00    -0.2610)  ( 0.00     0.2861)
 D :1...1            ( 0.00     1.2422)
 F :1...1            ( 0.00     4.0028)

 CYCLE   11
  SDIIS (wt  1.000):  0.0000  0.0000  0.0000 -0.0074  1.0073
  DIIS coefficients:  0.0000  0.0000  0.0000 -0.0074  1.0073
 SCF Error: norm([F,P])=      0.000000036355, max([F,P])=      0.000000024202
 orbitals (Q,E):
 ---------------
 S :1...3            ( 2.00   -14.1369)  ( 2.00    -0.6837)  ( 0.00     0.5206)
 P :1...2            ( 3.00    -0.2610)  ( 0.00     0.2861)
 D :1...1            ( 0.00     1.2422)
 F :1...1            ( 0.00     4.0028)

 CYCLE   12
  SDIIS (wt  1.000):  0.0000 -0.0002 -0.0049  1.0051
  DIIS coefficients:  0.0000 -0.0002 -0.0049  1.0051
 SCF Error: norm([F,P])=      0.000000000633, max([F,P])=      0.000000000378
 orbitals (Q,E):
 ---------------
 S :1...3            ( 2.00   -14.1369)  ( 2.00    -0.6837)  ( 0.00     0.5206)
 P :1...2            ( 3.00    -0.2610)  ( 0.00     0.2861)
 D :1...1            ( 0.00     1.2422)
 F :1...1            ( 0.00     4.0028)

 SCF CONVERGED

 CYCLE   13
1
 ***************************************************************************************************


                                                *******************
                                                *  R E S U L T S  *
                                                *******************
  
  
 Hartree-Fock exchange energy:   -5.98006762929401     
 *** Setting up for NEW gradients in Focky
 *** Using FIT density in Focky

 Scaled ZORA Orbital Energies, per Irrep and Spin:
 =================================================
                        Occup              E (au)              E (eV)       Diff (eV) with prev. cycle
                        -----      --------------------        ------       --------------------------
 S
               1        2.000     -0.14136927494044E+02      -384.685              -2.89E-10
               2        2.000     -0.68367719482847E+00       -18.604              -1.81E-10
               3        0.000      0.52058229608722E+00        14.166
               4        0.000      0.68938411499461E+01       187.591
               5        0.000      0.63487931372504E+02      1727.595
 P
               1        3.000     -0.26097654586035E+00        -7.102              -1.71E-10
               2        0.000      0.28609946376341E+00         7.785
               3        0.000      0.32911701729664E+01        89.557
 D
               1        0.000      0.12422463442215E+01        33.803
 F
               1        0.000      0.40028176767591E+01       108.922


 Partially Occupied:
               1 P                -0.26097654586035E+00
  
 HOMO :        2 S                -0.68367719482847E+00
 LUMO :        2 P                 0.28609946376341E+00
  


 Orbital Energies, all Irreps
 ========================================

 Irrep        no.  (spin)   Occup              E (au)                E (eV)
 ---------------------------------------------------------------------------
 S             1             2.00       -0.14136927494044E+02      -384.6854
 S             2             2.00       -0.68367719482847E+00       -18.6038
 P             1             3.00       -0.26097654586035E+00        -7.1015
 P             2             0.00        0.28609946376341E+00         7.7852
 S             3             0.00        0.52058229608722E+00        14.1658
 D             1             0.00        0.12422463442215E+01        33.8032
 P             3             0.00        0.32911701729664E+01        89.5573
 F             1             0.00        0.40028176767591E+01       108.9222
 S             4             0.00        0.68938411499461E+01       187.5910
 S             5             0.00        0.63487931372504E+02      1727.5945


 All Electron Calculation, thus no Orbital Energies of the Core Orbitals are calculated


 =======================================
 M U L L I K E N   P O P U L A T I O N S
 =======================================
  
 The survey below gives for each atom:
 a) the total charge (Z minus electrons)
 b) the net spin polarization (nr of electrons spin-A minus spin-B)
 c) for each spin the atomic electron valence density (integrated) per L-value.

 Atom              Charge    Spin density          S         P         D         F
 ----              ------    ------------       ------    ------    ------    ------
 1 N               0.0000                       4.0000    3.0000    0.0000    0.0000

 Populations of individual BAS functions
 ----------------------------------------
 1 N            0.5385  1.4480 -0.0461  1.1687  0.8909  0.1406  0.1406  0.1406  0.5648  0.5648
                0.5648  0.2945  0.2945  0.2945  0.0000  0.0000  0.0000  0.0000  0.0000  0.0000
                0.0000  0.0000  0.0000  0.0000  0.0000  0.0000  0.0000  0.0000  0.0000  0.0000

 Gross Charges per Atom (Z minus electrons)
 ==========================================
             0.0000
 Net Total:  0.00000000


 =======================================================================
 Electrostatic potential at the Nuclei due to electrons and other nuclei
 =======================================================================
  
         Atom                  Potential
         ----                  ---------
     1)   N                  18.30396531
 
 
 ========================
 No memory problems found
 ========================
 
 Maximum number of active allocate calls:         480
 
 *******************************************************************************

                             A D F   E X I T
 NORMAL TERMINATION


 =================
 Timing Statistics
 =================
  
 Total Used :                     CPU=        0.31      System=        0.02     Elapsed=        0.40

 Calls  Section                     ( Mean, Percentage )
 ---------------------------------------------------------------------------------------------------
     3  ><      ................      0.00    0.21             0.00    0.03             0.00    0.72
     1  INIT    ................      0.01    3.86             0.00   16.43             0.03    7.13
     1  GEOMET  ................      0.01    2.29             0.00    0.00             0.01    3.28
     1  INPUTA  ................      0.00    0.00             0.00    6.91             0.00    0.57
     1  MAINSY  ................      0.01    2.06             0.00    1.25             0.01    2.98
     1  SYMFIT  ................      0.00    0.30             0.00    0.00             0.00    0.24
     1  CORORT  ................      0.00    0.00             0.00    1.68             0.00    0.43
     1  SYMORB  ................      0.00    0.00             0.00    3.81             0.00    0.23
     1  FITINT  ................      0.01    1.71             0.00   12.20             0.01    2.44
     1  CLSMAT  ................      0.00    0.06             0.00    0.41             0.00    0.42
     1  ORTHON  ................      0.00    0.27             0.00    1.74             0.00    0.58
     1  GENPT   ................      0.01    2.46             0.00    7.36             0.01    2.97
     1  PTBAS   ................      0.00    0.14             0.00   12.58             0.00    1.20
    13  FOCKY   ................      0.02   69.92             0.00   27.73             0.02   57.19
    13  FOCKTR  ................      0.00    2.24             0.00    2.83             0.00    1.93
    13  SDIIS   ................      0.00    4.55             0.00    5.06             0.00    8.74
     1  COREPS  ................      0.01    4.30             0.00    0.00             0.01    3.37
     1  POPAN   ................      0.00    1.21             0.00    0.00             0.01    1.31
     1  DEBYE   ................      0.00    0.15             0.00    0.00             0.00    0.39
     1  EXIT PROCEDURE .........      0.01    4.28             0.00    0.00             0.02    3.90


 Currently Open Files (EXIT00)
 ====================

 Unit    Access Format  Status   Type       Ident (file)
 -------------------------------------------------------
   3      SEQ    FORM   TRANSP  NORMAL      LOGFILE
                                          ( logfile )


 Buffered I/O statistics
 =======================
 Memory available:                     67108864
 Number of records fitting in memory:     16131
 Input :   0.1% of                        32767  *4k bytes
 Output:  15.5% of                         1506  *4k bytes
 Records from serial files evicted:           0
                    others evicted:           0
 Hash table lookups:      85076 with          0 conflicts (  0.00%)

 ***************************************************************************************************
 (LOGFILE)
 <Dec09-2020> <01:39:24>  DIRAC 2017  RunTime: Dec09-2020 01:39:24  Nodes: 1  Procs: 1
 <Dec09-2020> <01:39:24>  NORMAL TERMINATION
 <Dec09-2020> <01:39:24>  END
 <Dec09-2020> <01:39:24>  ADF 2017  RunTime: Dec09-2020 01:39:24  Nodes: 1  Procs: 1
 <Dec09-2020> <01:39:24>  Hydrogen (TZ2P)
 <Dec09-2020> <01:39:24>  RunType   : CREATE
 <Dec09-2020> <01:39:24>  Net Charge: 0 (Nuclei minus Electrons)
 <Dec09-2020> <01:39:24>  Symmetry  : ATOM
  Coordinates
    Atom         X           Y           Z   (Angstrom)
    1.H         0.000000    0.000000    0.000000
 <Dec09-2020> <01:39:24>  >>>> CORORT
 <Dec09-2020> <01:39:24>  >>>> FITINT
 <Dec09-2020> <01:39:24>  >>>> CLSMAT
 <Dec09-2020> <01:39:24>  >>>> ORTHON
 <Dec09-2020> <01:39:24>  >>>> GENPT
 <Dec09-2020> <01:39:24>  Block Length=  64
 <Dec09-2020> <01:39:24>  >>>> PTBAS
 <Dec09-2020> <01:39:24>  >>>> CYCLE
 <Dec09-2020> <01:39:24>              |Error|         MaxErr       Wt(A-DIIS)
 <Dec09-2020> <01:39:24>      1      0.00000000      0.00000000
 <Dec09-2020> <01:39:24>      2      0.03155047      0.03012130
 <Dec09-2020> <01:39:24>      3      0.00862036      0.00834572    100.0
 <Dec09-2020> <01:39:24>      4      0.00173320      0.00171953      0.7
 <Dec09-2020> <01:39:24>      5      0.00004372      0.00003982      0.0
 <Dec09-2020> <01:39:24>      6      0.00000239      0.00000216      0.0
 <Dec09-2020> <01:39:24>      7      0.00000001      0.00000001      0.0
 <Dec09-2020> <01:39:24>  SCF converged
 <Dec09-2020> <01:39:24>      8      0.00000000      0.00000000      0.0
 <Dec09-2020> <01:39:24>  >>>> POPAN
 <Dec09-2020> <01:39:24>  >>>> DEBYE
 <Dec09-2020> <01:39:24>  NORMAL TERMINATION
 <Dec09-2020> <01:39:24>  END
 <Dec09-2020> <01:39:24>  DIRAC 2017  RunTime: Dec09-2020 01:39:24  Nodes: 1  Procs: 1
 <Dec09-2020> <01:39:24>  NORMAL TERMINATION
 <Dec09-2020> <01:39:24>  END
 <Dec09-2020> <01:39:25>  ADF 2017  RunTime: Dec09-2020 01:39:25  Nodes: 1  Procs: 1
 <Dec09-2020> <01:39:25>  Nitrogen (TZ2P)
 <Dec09-2020> <01:39:25>  RunType   : CREATE
 <Dec09-2020> <01:39:25>  Net Charge: 0 (Nuclei minus Electrons)
 <Dec09-2020> <01:39:25>  Symmetry  : ATOM
  Coordinates
    Atom         X           Y           Z   (Angstrom)
    1.N         0.000000    0.000000    0.000000
 <Dec09-2020> <01:39:25>  >>>> CORORT
 <Dec09-2020> <01:39:25>  >>>> FITINT
 <Dec09-2020> <01:39:25>  >>>> CLSMAT
 <Dec09-2020> <01:39:25>  >>>> ORTHON
 <Dec09-2020> <01:39:25>  >>>> GENPT
 <Dec09-2020> <01:39:25>  Block Length=  72
 <Dec09-2020> <01:39:25>  >>>> PTBAS
 <Dec09-2020> <01:39:25>  >>>> CYCLE
 <Dec09-2020> <01:39:25>              |Error|         MaxErr       Wt(A-DIIS)
 <Dec09-2020> <01:39:25>      1      0.00000000      0.00000000
 <Dec09-2020> <01:39:25>      2      6.47720093      4.24006811    100.0
 <Dec09-2020> <01:39:25>      3      2.46800817      1.94812547    100.0
 <Dec09-2020> <01:39:25>      4      1.00979984      0.66218778    100.0
 <Dec09-2020> <01:39:25>      5      0.78846124      0.54226444    100.0
 <Dec09-2020> <01:39:25>      6      0.08887211      0.05234604     51.9
 <Dec09-2020> <01:39:25>      7      0.05595493      0.03712600     36.5
 <Dec09-2020> <01:39:25>      8      0.00836694      0.00569520      4.7
 <Dec09-2020> <01:39:25>      9      0.00034439      0.00023023      0.0
 <Dec09-2020> <01:39:25>     10      0.00000401      0.00000238      0.0
 <Dec09-2020> <01:39:25>     11      0.00000004      0.00000002      0.0
 <Dec09-2020> <01:39:25>     12      0.00000000      0.00000000      0.0
 <Dec09-2020> <01:39:25>  SCF converged
 <Dec09-2020> <01:39:25>     13      0.00000000      0.00000000      0.0
 <Dec09-2020> <01:39:25>  >>>> POPAN
 <Dec09-2020> <01:39:25>  >>>> DEBYE
 <Dec09-2020> <01:39:25>  NORMAL TERMINATION
 <Dec09-2020> <01:39:25>  END
NORMAL TERMINATION

 *******************************************************************************
 *                                                                             *
 *  -------------------------------------                                      *
 *   Amsterdam Density Functional  (ADF)         2017                          *
 *  -------------------------------------                                      *
 *                                               r58813 2017-04-12             *
 *                                                                             *
 *                                                                             *
 *                            =====================                            *
 *                            |                   |                            *
 *                            |     D I R A C     |                            *
 *                            |                   |                            *
 *                            =====================                            *
 *                                                                             *
 *                                                                             *
 *   Online information and documentation:  https://www.scm.com/support/       *
 *   E-mail:  support@scm.com   info@scm.com                                   *
 *                                                                             *
 *   Scientific publications using ADF results must be properly referenced     *
 *   See the User Manuals (or the web site) for recommended citations          *
 *   The terms and conditions of the End User License Agreement apply to       *
 *   the use of ADF, https://www.scm.com/license-terms/                        *
 *                                                                             *
 **********************  x86_64_linux_intel / intelmpi  ************************
 
 Licensed to: SURF-SARA, Comp. & Networking Services / Amsterdam / NL
 SCM User ID: u7409
  
 DIRAC 2017  RunTime: Dec09-2020 01:39:25  Nodes: 1  Procs: 1

 Temporary files are created in /scratch/kid_0.781IDl

1
 SULPHUR ATOM all electron RELATIVISTIC, Point Nuc, A and c f
 N J RN H ZN XION ANUC CLIGHT
 5000    7100.00000000197.36710137 16.00000000  0.00000000   31.972070  0.1370360E+03
  PH   PHI     EPS        DEL        DELRVR
  0.30  0.30     2500.00  0.00001000  0.00001000
 IDIRC  NC1  NDEBU NPRIN  IPUN IRCOR IWCOR
   1   300     0     0     0     0     0
   XALPHA      XLATTER      RNUC
  0.70000000  0.00000000  0.00000000 Point Charge
   XN   XL   XJ      XE          XZ      XDELL
  1.0  0.0  0.5    -600.000       2.000     0.00000
  2.0  0.0  0.5     -75.000       2.000     0.00000
  2.0  1.0  0.5     -70.000       2.000     0.00000
  2.0  1.0  1.5     -70.000       4.000     0.00000
  3.0  0.0  0.5     -25.000       2.000     0.00000
  3.0  1.0  0.5      -0.250       2.000     0.00000
  3.0  1.0  1.5      -0.250       2.000     0.00000
 ICORP=  0  NPCL=  0  DEMP=0.00  PEPS=0.000000
 R(1)=  0.1000000E-08 D=  0.1005080E+01 RNUC=  0.0000000E+00
 converged at cycle   32  DENSITY AVERAGING    0.3000
  MAXIMUM ERROR IN R.V(R) IS   0.72551816E-05
 Q,EY,EV,EZ,ESUM,ETOT,RHO  0.160000E+02 -0.322118E+02 -0.628554E+03 -0.950912E+03 -0.228522E+03 -0.397754E+03  0.428595E-13


 DIRAC CALCULATION
1                    SULPHUR ATOM all electron RELATIVISTIC, Point Nuc, A and c from libtc


 EXCHANGE COEFFICIENT=  0.7000000           TAIL CORRECTION=  0.           NUCLEAR RADIUS=  0.000E+00
0                       ORBITAL    N    L    J     ELECTRONS     EIGENVALUE                DELTA OF EIGENV.

                          1S1/2  1.0  0.0  0.5     2.000       -0.8822261E+02                 0.4395884E-04
                          2S1/2  2.0  0.0  0.5     2.000       -0.7739913E+01                 0.5298639E-05
                          2P1/2  2.0  1.0  0.5     2.000       -0.5775818E+01                 0.7066558E-05
                          2P3/2  2.0  1.0  1.5     4.000       -0.5729254E+01                 0.7085802E-05
                          3S1/2  3.0  0.0  0.5     2.000       -0.6034996E+00                 0.4266530E-06
                          3P1/2  3.0  1.0  0.5     2.000       -0.2319612E+00                 0.4585064E-06
                          3P3/2  3.0  1.0  1.5     2.000       -0.2288141E+00                 0.4612681E-06


                                        NUCLEAR CHARGE=   16.000000
                            INTEGRAL OF CHARGE DENSITY=   16.000000
                           SUM OF THE ORBITAL ENERGIES=   -228.5222
                                          TOTAL ENERGY=   -397.7542
                                        KINETIC ENERGY=    400.0321
                             NUCLEAR ATTRACTION ENERGY=   -950.9123
                             ELECTRON REPULSION ENERGY=    177.2849
                                       EXCHANGE ENERGY=    -24.1588

 *******************************************************************************

                             D I R A C   E X I T
 NORMAL TERMINATION


 =================
 Timing Statistics
 =================
  
 Total Used :                     CPU=        0.11      System=        0.01     Elapsed=        0.13

 Calls  Section                     ( Mean, Percentage )
 ---------------------------------------------------------------------------------------------------
     2  ><      ................      0.00    0.01             0.00    0.00             0.00    0.01
     1  EXIT PROCEDURE .........      0.11   99.99             0.01  100.00             0.13   99.99


 Currently Open Files (EXIT00)
 ====================

 Unit    Access Format  Status   Type       Ident (file)
 -------------------------------------------------------
   3      SEQ    FORM   TRANSP  NORMAL      LOGFILE
                                          ( logfile )


 Buffered I/O statistics
 =======================
 Memory available:                     67108864
 Number of records fitting in memory:     16131
 Input : 100.0% of                            0  *4k bytes
 Output: 100.0% of                            0  *4k bytes
 Records from serial files evicted:           0
                    others evicted:           0
 Hash table lookups:          0 with          0 conflicts (100.00%)
NORMAL TERMINATION

Create S   file=TZ2P-S
XC
  GGA PBE
End
relativistic ZORA
HartreeFock
Corepotentials t12.rel
End Input

 *******************************************************************************
 *                                                                             *
 *  -------------------------------------                                      *
 *   Amsterdam Density Functional  (ADF)         2017                          *
 *  -------------------------------------                                      *
 *                                               r58813 2017-04-12             *
 *                                                                             *
 *                                                                             *
 *                              =================                              *
 *                              |               |                              *
 *                              |     A D F     |                              *
 *                              |               |                              *
 *                              =================                              *
 *                                                                             *
 *                                                                             *
 *   Online information and documentation:  https://www.scm.com/support/       *
 *   E-mail:  support@scm.com   info@scm.com                                   *
 *                                                                             *
 *   Scientific publications using ADF results must be properly referenced     *
 *   See the User Manuals (or the web site) for recommended citations          *
 *   The terms and conditions of the End User License Agreement apply to       *
 *   the use of ADF, https://www.scm.com/license-terms/                        *
 *                                                                             *
 **********************  x86_64_linux_intel / intelmpi  ************************
 
 Licensed to: SURF-SARA, Comp. & Networking Services / Amsterdam / NL
 SCM User ID: u7409
  
 ADF 2017  RunTime: Dec09-2020 01:39:25  Nodes: 1  Procs: 1

 Temporary files are created in /scratch/kid_0.gkjzHA

 Sulphur (TZ2P)


 ===========================
 A T T A C H E D   F I L E S
 ===========================
  
 CREATE - Data File:    TZ2P-S
                        Sulphur (TZ2P)
 Core Potentials:
         file : t12.rel


 ===============================
 M O D E L   P A R A M E T E R S
 ===============================
  
 DENSITY FUNCTIONAL POTENTIAL (scf)
    LDA:                               PW92                                    == Not Default ==
    Gradient Corrections:              PBEc PBEx                               == Not Default ==

 SPIN  (restricted / unrestr.)
    Molecule:                          Restricted                               

 OTHER ASPECTS
    Relativistic Corrections:          scalar (ZORA,MAPA)                      == Not Default ==

    Nuclear Charge Density Model:      Point Charge Nuclei                      
    Core Treatment:                    Frozen Orbital(s)                        

    Hyperfine or Zeeman Interaction:   ---                                      


 =====================================
 S Y M M E T R Y ,   E L E C T R O N S
 =====================================
  
 Symmetry: ATOM

 Irreducible Representations, including subspecies
 -------------------------------------------------
 S
 P:x  P:y  P:z
 D:z2  D:x2-y2  D:xy  D:xz  D:yz
 F:z3  F:z  F:xyz  F:z2x  F:z2y  F:x  F:y


 Configuration of Valence Electrons
 ==================================

          Occupation Numbers
          -------------------------------------------------
 S        3*2
 P        6 4
 D        0
 F        0
          -------------------------------------------------

 Total:   16

 Net Charge: 0 (Nuclei minus Electrons)

 Preset values for MO occupations will be applied through SCF cycle no. 1000000
 Thereafter, the program will assign electrons to MOs that are spatially
 similar to the occupied MOs in a "reference" cycle ("KeepOrbitals").
 The reference cycle is always the PREVIOUS cycle: it will evolve with
 the SCF procedure.


 ================================
 (Slater-type)  F U N C T I O N S  ***  (Basis and Fit)  ***
 ================================
  

 Atom Type    1  (S)
 ==============

 Valence Basis Sets:  14
 -----------------------
   1 S   19.400000
   1 S   14.350000
   2 S    5.900000
   2 S    4.250000
   2 P    8.050000
   2 P    4.550000
   3 S    3.450000
   3 S    2.250000
   3 S    1.500000
   3 P    2.650000
   3 P    1.600000
   3 P    1.000000
   3 D    2.100000
   4 F    2.100000


 BAS: List of all Elementary Cartesian Basis Functions
 =====================================================

 The numbering in the list below (to the right of the function characteristics) is referred
 to in print-outs of MO eigenvectors and Mulliken populations in the BAS representation
 (as contrasted to the SFO representation).

 Notes:
 1. The functions are characterized by a polynomial prefactor (powers of x,y,z and r) and
    an exponential decay factor alpha.
 2. Since the basis sets are specific for an atom TYPE, the individual functions occur on
    all atoms of that type.
 3. The word 'Core' in the left margin signals that it is a Core Function (CF) : not a
    degree of freedom in the valence set, but only used to ensure orthogonalization of
    the other valence basis functions on the frozen Core Orbitals.


 (power of) X  Y  Z  R     Alpha  on Atom
            ==========     =====     ==========

 S                                    1
                                  ---------------------------------------------------------------------------
            0  0  0  0    19.400      1
            0  0  0  0    14.350      2
            0  0  0  1     5.900      3
            0  0  0  1     4.250      4
            1  0  0  0     8.050      5
            0  1  0  0     8.050      6
            0  0  1  0     8.050      7
            1  0  0  0     4.550      8
            0  1  0  0     4.550      9
            0  0  1  0     4.550     10
            0  0  0  2     3.450     11
            0  0  0  2     2.250     12
            0  0  0  2     1.500     13
            1  0  0  1     2.650     14
            0  1  0  1     2.650     15
            0  0  1  1     2.650     16
            1  0  0  1     1.600     17
            0  1  0  1     1.600     18
            0  0  1  1     1.600     19
            1  0  0  1     1.000     20
            0  1  0  1     1.000     21
            0  0  1  1     1.000     22
            2  0  0  0     2.100     23
            1  1  0  0     2.100     24
            1  0  1  0     2.100     25
            0  2  0  0     2.100     26
            0  1  1  0     2.100     27
            0  0  2  0     2.100     28
            3  0  0  0     2.100     29
            2  1  0  0     2.100     30
            2  0  1  0     2.100     31
            1  2  0  0     2.100     32
            1  1  1  0     2.100     33
            1  0  2  0     2.100     34
            0  3  0  0     2.100     35
            0  2  1  0     2.100     36
            0  1  2  0     2.100     37
            0  0  3  0     2.100     38

 Total number of charge fitting functions (nprimf)       106
 Total number of Cartesian basis functions (naos)         38
 Total number of Cartesian core functions  (ncos)          0


 BAS: List of all Elementary Cartesian Basis Functions
 =====================================================

 The numbering in the list below (to the right of the function characteristics) is referred
 to in print-outs of MO eigenvectors and Mulliken populations in the BAS representation
 (as contrasted to the SFO representation).

 Notes:
 1. The functions are characterized by a polynomial prefactor (powers of x,y,z and r) and
    an exponential decay factor alpha.
 2. Since the basis sets are specific for an atom TYPE, the individual functions occur on
    all atoms of that type.
 3. The word 'Core' in the left margin signals that it is a Core Function (CF) : not a
    degree of freedom in the valence set, but only used to ensure orthogonalization of
    the other valence basis functions on the frozen Core Orbitals.


 (power of) X  Y  Z  R     Alpha  on Atom
            ==========     =====     ==========

 S                                    1
                                  ---------------------------------------------------------------------------
            0  0  0  0    19.400      1
            0  0  0  0    14.350      2
            0  0  0  1     5.900      3
            0  0  0  1     4.250      4
            1  0  0  0     8.050      5
            0  1  0  0     8.050      6
            0  0  1  0     8.050      7
            1  0  0  0     4.550      8
            0  1  0  0     4.550      9
            0  0  1  0     4.550     10
            0  0  0  2     3.450     11
            0  0  0  2     2.250     12
            0  0  0  2     1.500     13
            1  0  0  1     2.650     14
            0  1  0  1     2.650     15
            0  0  1  1     2.650     16
            1  0  0  1     1.600     17
            0  1  0  1     1.600     18
            0  0  1  1     1.600     19
            1  0  0  1     1.000     20
            0  1  0  1     1.000     21
            0  0  1  1     1.000     22
            2  0  0  0     2.100     23
            1  1  0  0     2.100     24
            1  0  1  0     2.100     25
            0  2  0  0     2.100     26
            0  1  1  0     2.100     27
            0  0  2  0     2.100     28
            3  0  0  0     2.100     29
            2  1  0  0     2.100     30
            2  0  1  0     2.100     31
            1  2  0  0     2.100     32
            1  1  1  0     2.100     33
            1  0  2  0     2.100     34
            0  3  0  0     2.100     35
            0  2  1  0     2.100     36
            0  1  2  0     2.100     37
            0  0  3  0     2.100     38
1
 ***************************************************************************************************


                                              ***********************
                                              *  T E C H N I C A L  *
                                              ***********************
  


 =============================================================
 P A R A L L E L I Z A T I O N  and  V E C T O R I Z A T I O N
 =============================================================
  
 Nr of parallel processes:                                1
 Maximum vector length in NumInt loops:                 128

 IO buffersize (Mb):                                     64.000000


 =====================
 S C F   U P D A T E S
 =====================
  
 Max. nr. of cycles:                               300
 Convergence criterion:                              0.0000000100
   secondary criterion:                              0.0000000100

 Mix parameter (when DIIS does not apply):           0.2000000000
 Special mix parameter for the first cycle:          1.0000000000
 Mixed ADIIS+DIIS will be used
    Max number of expansion vectors:                10
    Pure ADIIS when Max([F,P]) is above              0.1000000000
    Pure DIIS when Max([F,P]) is below               0.0010000000
 Automatic ElectronSmearing (in case of problematic SCF convergence) disabled


 =================
 P R E C I S I O N  ***  (General: NumInt, NeglectFunctionTails, ...)  ***
 =================
  

 NumInt:           Target precision:                12.0000000000
 -------           Initial precision:               10.0000000000
                   Min. precision (optimization):   10.0000000000

 Neglect Functions:          Basis functions:        0.1000000000E-13
 ------------------          Fit functions:          0.1000000000E-13


 ===========================
 L I N E A R   S C A L I N G
 ===========================
  

 Cut-off radii density fit:                        0.1000000000E-97
 Overlap cut-off criterion AO matrix elements:     0.1000000000E-97
 Cut-offs for Coulomb potential and fitted density:0.1000000000E-97
 Cut-off criterion for Coulomb multipole terms:    0.1000000000E-97
 Progressive Convergence parameter:                 0.000000000    
1
 ***************************************************************************************************


                                            ***************************
                                            *  C O M P U T A T I O N  *
                                            ***************************
  

 Number of elements of the density matrix on this node (used, total):       741       741


 ===========================================
 Numerical Integration : Fuzzy Cells (Becke)
 ===========================================
  
 Becke grid quality: VERYGOOD       
  
 Lebedev angular grid order:             min:  13 max:  41
 Nr. of radial points:                   min:  85 max:  85

 Total nr. of points:         85
 Nr. of blocks:                1
 Block length:                85
 Nr. of dummy points:          0


 Test of Precision of the Numerical Integration Grid
 ===================================================

 Integral of the Total Core Density:                   0.00000000000000


 ========================
 Density Fitting (zlmFit)
 ========================
  
 ZlmFit Fit Quality: VERYGOOD       
  
 Max L-expansion:                        min:   0 max:   0
 Nr. of radial interpolation points:     min: 180 max: 180


 =====
 S C F  ***  ScaSCF  ***
 =====
  

 CYCLE    1
 SCF Error: norm([F,P])=      0.000000000000, max([F,P])=      0.000000000000
 orbitals (Q,E):
 ---------------
 S :1...7            ( 2.00  -128.2940)  ( 2.00   -32.0870)  ( 2.00   -14.2377)  ( 0.00    -7.9135)
                     ( 0.00    -4.8482)  ( 0.00    -3.0460)  ( 0.00   156.9294)
 P :1...5            ( 6.00   -32.0367)  ( 4.00   -13.9577)  ( 0.00    -7.5934)  ( 0.00    -4.7360)
                     ( 0.00    -3.0004)
 D :1...1            ( 0.00    -8.9947)
 F :1...1            ( 0.00    -6.1947)

 CYCLE    2
  SDIIS (wt  0.000):  1.0000  0.0000
 A-DIIS (wt  1.000):  0.0000  1.0000
  DIIS coefficients:  0.0000  1.0000
 SCF Error: norm([F,P])=     30.562350755243, max([F,P])=      9.990587946237
 orbitals (Q,E):
 ---------------
 S :1...4            ( 2.00   -74.9088)  ( 2.00    -2.2263)  ( 2.00     0.8015)  ( 0.00     2.5360)
 P :1...3            ( 6.00    -0.0854)  ( 4.00     0.2103)  ( 0.00     3.1788)
 D :1...1            ( 0.00     5.5545)
 F :1...1            ( 0.00     9.1181)

 CYCLE    3
  SDIIS (wt  0.000):  0.3058  0.6942
 A-DIIS (wt  1.000):  0.2445  0.7555
  DIIS coefficients:  0.2445  0.7555
 SCF Error: norm([F,P])=     19.197662775322, max([F,P])=      5.099916722150
 orbitals (Q,E):
 ---------------
 S :1...4            ( 2.00   -92.5199)  ( 2.00   -10.3784)  ( 2.00    -1.4688)  ( 0.00     0.3527)
 P :1...3            ( 6.00    -8.5422)  ( 4.00    -0.9608)  ( 0.00    -0.0434)
 D :1...1            ( 0.00     0.5196)
 F :1...1            ( 0.00     2.3916)

 CYCLE    4
  SDIIS (wt  0.000): -0.1103  0.1213  0.9890
 A-DIIS (wt  1.000):  0.0000  0.0000  1.0000
  DIIS coefficients:  0.0000  0.0000  1.0000
 SCF Error: norm([F,P])=      5.705283609205, max([F,P])=      1.912075441664
 orbitals (Q,E):
 ---------------
 S :1...4            ( 2.00   -84.7798)  ( 2.00    -5.5828)  ( 2.00    -0.0569)  ( 0.00     0.5527)
 P :1...3            ( 6.00    -3.4470)  ( 4.00     0.0868)  ( 0.00     0.4305)
 D :1...1            ( 0.00     1.1183)
 F :1...1            ( 0.00     1.7251)

 CYCLE    5
  SDIIS (wt  0.000): -0.0326 -0.0780  0.4355  0.6751
 A-DIIS (wt  1.000):  0.0000  0.0000  0.3497  0.6503
  DIIS coefficients:  0.0000  0.0000  0.3497  0.6503
 SCF Error: norm([F,P])=      4.444067377799, max([F,P])=      1.949115713778
 orbitals (Q,E):
 ---------------
 S :1...4            ( 2.00   -89.1057)  ( 2.00    -8.3233)  ( 2.00    -0.9793)  ( 0.00     0.0212)
 P :1...3            ( 6.00    -6.3090)  ( 4.00    -0.5649)  ( 0.00     0.0183)
 D :1...1            ( 0.00     0.0904)
 F :1...1            ( 0.00     0.9995)

 CYCLE    6
  SDIIS (wt  0.000):  0.0064 -0.0136 -0.1026  0.1174  0.9925
 A-DIIS (wt  1.000):  0.0000  0.0000  0.0000  0.0000  1.0000
  DIIS coefficients:  0.0000  0.0000  0.0000  0.0000  1.0000
 SCF Error: norm([F,P])=      0.789875750838, max([F,P])=      0.338603742236
 orbitals (Q,E):
 ---------------
 S :1...4            ( 2.00   -87.7911)  ( 2.00    -7.3622)  ( 2.00    -0.4721)  ( 0.00     0.2691)
 P :1...3            ( 6.00    -5.3149)  ( 4.00    -0.1307)  ( 0.00     0.1877)
 D :1...1            ( 0.00     0.5959)
 F :1...1            ( 0.00     1.3863)

 CYCLE    7
  SDIIS (wt  0.000):  0.0012  0.0006 -0.0229 -0.0330  0.4901  0.5641
 A-DIIS (wt  1.000):  0.0000  0.0000  0.0000  0.0000  0.4444  0.5556
  DIIS coefficients:  0.0000  0.0000  0.0000  0.0000  0.4444  0.5556
 SCF Error: norm([F,P])=      0.729473776783, max([F,P])=      0.336392868928
 orbitals (Q,E):
 ---------------
 S :1...4            ( 2.00   -88.4249)  ( 2.00    -7.8068)  ( 2.00    -0.6540)  ( 0.00     0.1836)
 P :1...3            ( 6.00    -5.7758)  ( 4.00    -0.2747)  ( 0.00     0.1256)
 D :1...1            ( 0.00     0.4090)
 F :1...1            ( 0.00     1.2529)

 CYCLE    8
  SDIIS (wt  0.772):  0.0000 -0.0001 -0.0001 -0.0005 -0.0215  0.0522  0.9700
 A-DIIS (wt  0.228):  0.0000  0.0000  0.0000  0.0000  0.0000  0.0000  1.0000
  DIIS coefficients:  0.0000 -0.0001 -0.0001 -0.0004 -0.0166  0.0403  0.9768
 SCF Error: norm([F,P])=      0.053291515027, max([F,P])=      0.023550282618
 orbitals (Q,E):
 ---------------
 S :1...4            ( 2.00   -88.3683)  ( 2.00    -7.7655)  ( 2.00    -0.6303)  ( 0.00     0.1963)
 P :1...3            ( 6.00    -5.7331)  ( 4.00    -0.2542)  ( 0.00     0.1316)
 D :1...1            ( 0.00     0.4328)
 F :1...1            ( 0.00     1.2717)

 CYCLE    9
  SDIIS (wt  0.952):  0.0000 -0.0000 -0.0001  0.0003  0.0069 -0.0146 -0.0278  1.0353
 A-DIIS (wt  0.048):  0.0000  0.0000  0.0000  0.0000  0.0000  0.0000  0.0000  1.0000
  DIIS coefficients:  0.0000 -0.0000 -0.0001  0.0003  0.0066 -0.0139 -0.0265  1.0336
 SCF Error: norm([F,P])=      0.012666694621, max([F,P])=      0.005746339416
 orbitals (Q,E):
 ---------------
 S :1...4            ( 2.00   -88.3797)  ( 2.00    -7.7738)  ( 2.00    -0.6342)  ( 0.00     0.1945)
 P :1...3            ( 6.00    -5.7417)  ( 4.00    -0.2575)  ( 0.00     0.1304)
 D :1...1            ( 0.00     0.4288)
 F :1...1            ( 0.00     1.2688)

 CYCLE   10
  SDIIS (wt  1.000):  0.0000 -0.0000  0.0000  0.0000 -0.0001 -0.0011 -0.0001  0.1159  0.8853
  DIIS coefficients:  0.0000 -0.0000  0.0000  0.0000 -0.0001 -0.0011 -0.0001  0.1159  0.8853
 SCF Error: norm([F,P])=      0.000766897012, max([F,P])=      0.000361627884
 orbitals (Q,E):
 ---------------
 S :1...4            ( 2.00   -88.3791)  ( 2.00    -7.7734)  ( 2.00    -0.6340)  ( 0.00     0.1946)
 P :1...3            ( 6.00    -5.7412)  ( 4.00    -0.2574)  ( 0.00     0.1304)
 D :1...1            ( 0.00     0.4290)
 F :1...1            ( 0.00     1.2689)

 CYCLE   11
  SDIIS (wt  1.000): -0.0000  0.0000  0.0000  0.0000 -0.0000  0.0000 -0.0012 -0.0175 -0.1624  1.1811
  DIIS coefficients: -0.0000  0.0000  0.0000  0.0000 -0.0000  0.0000 -0.0012 -0.0175 -0.1624  1.1811
 SCF Error: norm([F,P])=      0.000017831388, max([F,P])=      0.000005638959
 orbitals (Q,E):
 ---------------
 S :1...4            ( 2.00   -88.3791)  ( 2.00    -7.7734)  ( 2.00    -0.6340)  ( 0.00     0.1946)
 P :1...3            ( 6.00    -5.7413)  ( 4.00    -0.2574)  ( 0.00     0.1305)
 D :1...1            ( 0.00     0.4290)
 F :1...1            ( 0.00     1.2689)

 CYCLE   12
  SDIIS (wt  1.000):  0.0000  0.0000  0.0000 -0.0000 -0.0001  0.0004  0.0104  0.0531  0.9362
  DIIS coefficients:  0.0000  0.0000  0.0000 -0.0000 -0.0001  0.0004  0.0104  0.0531  0.9362
 SCF Error: norm([F,P])=      0.000002741927, max([F,P])=      0.000001141071
 orbitals (Q,E):
 ---------------
 S :1...4            ( 2.00   -88.3791)  ( 2.00    -7.7734)  ( 2.00    -0.6340)  ( 0.00     0.1946)
 P :1...3            ( 6.00    -5.7413)  ( 4.00    -0.2574)  ( 0.00     0.1305)
 D :1...1            ( 0.00     0.4290)
 F :1...1            ( 0.00     1.2689)

 CYCLE   13
  SDIIS (wt  1.000): -0.0000  0.0000  0.0004  0.0017  0.0305  0.9674
  DIIS coefficients: -0.0000  0.0000  0.0004  0.0017  0.0305  0.9674
 SCF Error: norm([F,P])=      0.000000047810, max([F,P])=      0.000000023199
 orbitals (Q,E):
 ---------------
 S :1...4            ( 2.00   -88.3791)  ( 2.00    -7.7734)  ( 2.00    -0.6340)  ( 0.00     0.1946)
 P :1...3            ( 6.00    -5.7413)  ( 4.00    -0.2574)  ( 0.00     0.1305)
 D :1...1            ( 0.00     0.4290)
 F :1...1            ( 0.00     1.2689)

 CYCLE   14
  SDIIS (wt  1.000): -0.0000  0.0000  0.0001 -0.0030  1.0029
  DIIS coefficients: -0.0000  0.0000  0.0001 -0.0030  1.0029
 SCF Error: norm([F,P])=      0.000000000424, max([F,P])=      0.000000000188
 orbitals (Q,E):
 ---------------
 S :1...4            ( 2.00   -88.3791)  ( 2.00    -7.7734)  ( 2.00    -0.6340)  ( 0.00     0.1946)
 P :1...3            ( 6.00    -5.7413)  ( 4.00    -0.2574)  ( 0.00     0.1305)
 D :1...1            ( 0.00     0.4290)
 F :1...1            ( 0.00     1.2689)

 SCF CONVERGED

 CYCLE   15
1
 ***************************************************************************************************


                                                *******************
                                                *  R E S U L T S  *
                                                *******************
  
  
 Hartree-Fock exchange energy:   -24.7665395469393     
 *** Setting up for NEW gradients in Focky
 *** Using FIT density in Focky

 Scaled ZORA Orbital Energies, per Irrep and Spin:
 =================================================
                        Occup              E (au)              E (eV)       Diff (eV) with prev. cycle
                        -----      --------------------        ------       --------------------------
 S
               1        2.000     -0.88379147182515E+02     -2404.919               1.38E-10
               2        2.000     -0.77733937147656E+01      -211.525               1.35E-10
               3        2.000     -0.63401739236204E+00       -17.252               9.82E-11
               4        0.000      0.19457308752473E+00         5.295
               5        0.000      0.20351236446622E+01        55.379
               6        0.000      0.12554012759828E+02       341.612
               7        0.000      0.19192102356116E+03      5222.437
 P
               1        6.000     -0.57412566210151E+01      -156.228               1.36E-10
               2        4.000     -0.25735900760907E+00        -7.003               8.59E-11
               3        0.000      0.13045180561781E+00         3.550
               4        0.000      0.12095047425690E+01        32.912
               5        0.000      0.12953084167378E+02       352.471
 D
               1        0.000      0.42899673992164E+00        11.674
 F
               1        0.000      0.12689244428374E+01        34.529


 Partially Occupied:
               2 P                -0.25735900760907E+00
  
 HOMO :        3 S                -0.63401739236204E+00
 LUMO :        3 P                 0.13045180561781E+00
  


 Orbital Energies, all Irreps
 ========================================

 Irrep        no.  (spin)   Occup              E (au)                E (eV)
 ---------------------------------------------------------------------------
 S             1             2.00       -0.88379147182515E+02     -2404.9190
 S             2             2.00       -0.77733937147656E+01      -211.5248
 P             1             6.00       -0.57412566210151E+01      -156.2275
 S             3             2.00       -0.63401739236204E+00       -17.2525
 P             2             4.00       -0.25735900760907E+00        -7.0031
 P             3             0.00        0.13045180561781E+00         3.5498
 S             4             0.00        0.19457308752473E+00         5.2946
 D             1             0.00        0.42899673992164E+00        11.6736
 P             4             0.00        0.12095047425690E+01        32.9123
 F             1             0.00        0.12689244428374E+01        34.5292
 S             5             0.00        0.20351236446622E+01        55.3785
 S             6             0.00        0.12554012759828E+02       341.6121
 P             5             0.00        0.12953084167378E+02       352.4714
 S             7             0.00        0.19192102356116E+03      5222.4368


 All Electron Calculation, thus no Orbital Energies of the Core Orbitals are calculated


 =======================================
 M U L L I K E N   P O P U L A T I O N S
 =======================================
  
 The survey below gives for each atom:
 a) the total charge (Z minus electrons)
 b) the net spin polarization (nr of electrons spin-A minus spin-B)
 c) for each spin the atomic electron valence density (integrated) per L-value.

 Atom              Charge    Spin density          S         P         D         F
 ----              ------    ------------       ------    ------    ------    ------
 1 S               0.0000                       6.0000   10.0000    0.0000    0.0000

 Populations of individual BAS functions
 ----------------------------------------
 1 S            0.5357  1.4236  1.5983  0.3953  0.7968  0.7968  0.7968  1.2013  1.2013  1.2013
                0.2964  1.2981  0.4526  0.3834  0.3834  0.3834  0.7706  0.7706  0.7706  0.1812
                0.1812  0.1812  0.0000  0.0000  0.0000  0.0000  0.0000  0.0000  0.0000  0.0000
                0.0000  0.0000  0.0000  0.0000  0.0000  0.0000  0.0000  0.0000

 Gross Charges per Atom (Z minus electrons)
 ==========================================
             0.0000
 Net Total:  0.00000000


 =======================================================================
 Electrostatic potential at the Nuclei due to electrons and other nuclei
 =======================================================================
  
         Atom                  Potential
         ----                  ---------
     1)   S                  59.52792209
 
 
 ========================
 No memory problems found
 ========================
 
 Maximum number of active allocate calls:         480
 
 *******************************************************************************

                             A D F   E X I T
 NORMAL TERMINATION


 =================
 Timing Statistics
 =================
  
 Total Used :                     CPU=        0.39      System=        0.01     Elapsed=        0.47

 Calls  Section                     ( Mean, Percentage )
 ---------------------------------------------------------------------------------------------------
     3  ><      ................      0.00    0.11             0.00    1.98             0.00    0.65
     1  INIT    ................      0.01    3.26             0.00   33.90             0.03    5.82
     1  GEOMET  ................      0.00    0.57             0.01   45.57             0.01    2.96
     1  INPUTA  ................      0.00    0.37             0.00    2.11             0.00    0.46
     1  MAINSY  ................      0.01    1.62             0.00    0.00             0.01    2.50
     1  SYMFIT  ................      0.00    0.22             0.00    0.00             0.00    0.18
     1  CORORT  ................      0.00    0.09             0.00    0.00             0.00    0.34
     1  SYMORB  ................      0.00    0.22             0.00    0.00             0.00    0.18
     1  FITINT  ................      0.01    2.64             0.00    0.00             0.01    2.51
     1  CLSMAT  ................      0.00    0.08             0.00    0.00             0.00    0.35
     1  ORTHON  ................      0.00    0.34             0.00    0.00             0.00    0.49
     1  GENPT   ................      0.01    2.80             0.00    0.00             0.01    2.85
     1  PTBAS   ................      0.00    0.82             0.00    0.00             0.00    1.00
    15  FOCKY   ................      0.02   71.83             0.00   16.21             0.02   61.37
    15  FOCKTR  ................      0.00    2.24             0.00    0.23             0.00    1.89
    15  SDIIS   ................      0.00    4.46             0.00    0.00             0.00    8.47
     1  COREPS  ................      0.01    3.79             0.00    0.00             0.01    3.18
     1  POPAN   ................      0.00    0.97             0.00    0.00             0.01    1.11
     1  DEBYE   ................      0.00    0.12             0.00    0.00             0.00    0.33
     1  EXIT PROCEDURE .........      0.01    3.45             0.00    0.00             0.02    3.36


 Currently Open Files (EXIT00)
 ====================

 Unit    Access Format  Status   Type       Ident (file)
 -------------------------------------------------------
   3      SEQ    FORM   TRANSP  NORMAL      LOGFILE
                                          ( logfile )


 Buffered I/O statistics
 =======================
 Memory available:                     67108864
 Number of records fitting in memory:     16131
 Input :   0.1% of                        37010  *4k bytes
 Output:  14.4% of                         1626  *4k bytes
 Records from serial files evicted:           0
                    others evicted:           0
 Hash table lookups:      96549 with          0 conflicts (  0.00%)

 ***************************************************************************************************
 (LOGFILE)
 <Dec09-2020> <01:39:24>  DIRAC 2017  RunTime: Dec09-2020 01:39:24  Nodes: 1  Procs: 1
 <Dec09-2020> <01:39:24>  NORMAL TERMINATION
 <Dec09-2020> <01:39:24>  END
 <Dec09-2020> <01:39:24>  ADF 2017  RunTime: Dec09-2020 01:39:24  Nodes: 1  Procs: 1
 <Dec09-2020> <01:39:24>  Hydrogen (TZ2P)
 <Dec09-2020> <01:39:24>  RunType   : CREATE
 <Dec09-2020> <01:39:24>  Net Charge: 0 (Nuclei minus Electrons)
 <Dec09-2020> <01:39:24>  Symmetry  : ATOM
  Coordinates
    Atom         X           Y           Z   (Angstrom)
    1.H         0.000000    0.000000    0.000000
 <Dec09-2020> <01:39:24>  >>>> CORORT
 <Dec09-2020> <01:39:24>  >>>> FITINT
 <Dec09-2020> <01:39:24>  >>>> CLSMAT
 <Dec09-2020> <01:39:24>  >>>> ORTHON
 <Dec09-2020> <01:39:24>  >>>> GENPT
 <Dec09-2020> <01:39:24>  Block Length=  64
 <Dec09-2020> <01:39:24>  >>>> PTBAS
 <Dec09-2020> <01:39:24>  >>>> CYCLE
 <Dec09-2020> <01:39:24>              |Error|         MaxErr       Wt(A-DIIS)
 <Dec09-2020> <01:39:24>      1      0.00000000      0.00000000
 <Dec09-2020> <01:39:24>      2      0.03155047      0.03012130
 <Dec09-2020> <01:39:24>      3      0.00862036      0.00834572    100.0
 <Dec09-2020> <01:39:24>      4      0.00173320      0.00171953      0.7
 <Dec09-2020> <01:39:24>      5      0.00004372      0.00003982      0.0
 <Dec09-2020> <01:39:24>      6      0.00000239      0.00000216      0.0
 <Dec09-2020> <01:39:24>      7      0.00000001      0.00000001      0.0
 <Dec09-2020> <01:39:24>  SCF converged
 <Dec09-2020> <01:39:24>      8      0.00000000      0.00000000      0.0
 <Dec09-2020> <01:39:24>  >>>> POPAN
 <Dec09-2020> <01:39:24>  >>>> DEBYE
 <Dec09-2020> <01:39:24>  NORMAL TERMINATION
 <Dec09-2020> <01:39:24>  END
 <Dec09-2020> <01:39:24>  DIRAC 2017  RunTime: Dec09-2020 01:39:24  Nodes: 1  Procs: 1
 <Dec09-2020> <01:39:24>  NORMAL TERMINATION
 <Dec09-2020> <01:39:24>  END
 <Dec09-2020> <01:39:25>  ADF 2017  RunTime: Dec09-2020 01:39:25  Nodes: 1  Procs: 1
 <Dec09-2020> <01:39:25>  Nitrogen (TZ2P)
 <Dec09-2020> <01:39:25>  RunType   : CREATE
 <Dec09-2020> <01:39:25>  Net Charge: 0 (Nuclei minus Electrons)
 <Dec09-2020> <01:39:25>  Symmetry  : ATOM
  Coordinates
    Atom         X           Y           Z   (Angstrom)
    1.N         0.000000    0.000000    0.000000
 <Dec09-2020> <01:39:25>  >>>> CORORT
 <Dec09-2020> <01:39:25>  >>>> FITINT
 <Dec09-2020> <01:39:25>  >>>> CLSMAT
 <Dec09-2020> <01:39:25>  >>>> ORTHON
 <Dec09-2020> <01:39:25>  >>>> GENPT
 <Dec09-2020> <01:39:25>  Block Length=  72
 <Dec09-2020> <01:39:25>  >>>> PTBAS
 <Dec09-2020> <01:39:25>  >>>> CYCLE
 <Dec09-2020> <01:39:25>              |Error|         MaxErr       Wt(A-DIIS)
 <Dec09-2020> <01:39:25>      1      0.00000000      0.00000000
 <Dec09-2020> <01:39:25>      2      6.47720093      4.24006811    100.0
 <Dec09-2020> <01:39:25>      3      2.46800817      1.94812547    100.0
 <Dec09-2020> <01:39:25>      4      1.00979984      0.66218778    100.0
 <Dec09-2020> <01:39:25>      5      0.78846124      0.54226444    100.0
 <Dec09-2020> <01:39:25>      6      0.08887211      0.05234604     51.9
 <Dec09-2020> <01:39:25>      7      0.05595493      0.03712600     36.5
 <Dec09-2020> <01:39:25>      8      0.00836694      0.00569520      4.7
 <Dec09-2020> <01:39:25>      9      0.00034439      0.00023023      0.0
 <Dec09-2020> <01:39:25>     10      0.00000401      0.00000238      0.0
 <Dec09-2020> <01:39:25>     11      0.00000004      0.00000002      0.0
 <Dec09-2020> <01:39:25>     12      0.00000000      0.00000000      0.0
 <Dec09-2020> <01:39:25>  SCF converged
 <Dec09-2020> <01:39:25>     13      0.00000000      0.00000000      0.0
 <Dec09-2020> <01:39:25>  >>>> POPAN
 <Dec09-2020> <01:39:25>  >>>> DEBYE
 <Dec09-2020> <01:39:25>  NORMAL TERMINATION
 <Dec09-2020> <01:39:25>  END
 <Dec09-2020> <01:39:25>  DIRAC 2017  RunTime: Dec09-2020 01:39:25  Nodes: 1  Procs: 1
 <Dec09-2020> <01:39:25>  NORMAL TERMINATION
 <Dec09-2020> <01:39:25>  END
 <Dec09-2020> <01:39:25>  ADF 2017  RunTime: Dec09-2020 01:39:25  Nodes: 1  Procs: 1
 <Dec09-2020> <01:39:25>  Sulphur (TZ2P)
 <Dec09-2020> <01:39:25>  RunType   : CREATE
 <Dec09-2020> <01:39:25>  Net Charge: 0 (Nuclei minus Electrons)
 <Dec09-2020> <01:39:25>  Symmetry  : ATOM
  Coordinates
    Atom         X           Y           Z   (Angstrom)
    1.S         0.000000    0.000000    0.000000
 <Dec09-2020> <01:39:25>  >>>> CORORT
 <Dec09-2020> <01:39:25>  >>>> FITINT
 <Dec09-2020> <01:39:25>  >>>> CLSMAT
 <Dec09-2020> <01:39:25>  >>>> ORTHON
 <Dec09-2020> <01:39:25>  >>>> GENPT
 <Dec09-2020> <01:39:25>  Block Length=  85
 <Dec09-2020> <01:39:25>  >>>> PTBAS
 <Dec09-2020> <01:39:25>  >>>> CYCLE
 <Dec09-2020> <01:39:25>              |Error|         MaxErr       Wt(A-DIIS)
 <Dec09-2020> <01:39:25>      1      0.00000000      0.00000000
 <Dec09-2020> <01:39:25>      2     30.56235076      9.99058795    100.0
 <Dec09-2020> <01:39:25>      3     19.19766278      5.09991672    100.0
 <Dec09-2020> <01:39:25>      4      5.70528361      1.91207544    100.0
 <Dec09-2020> <01:39:26>      5      4.44406738      1.94911571    100.0
 <Dec09-2020> <01:39:26>      6      0.78987575      0.33860374    100.0
 <Dec09-2020> <01:39:26>      7      0.72947378      0.33639287    100.0
 <Dec09-2020> <01:39:26>      8      0.05329152      0.02355028     22.8
 <Dec09-2020> <01:39:26>      9      0.01266669      0.00574634      4.8
 <Dec09-2020> <01:39:26>     10      0.00076690      0.00036163      0.0
 <Dec09-2020> <01:39:26>     11      0.00001783      0.00000564      0.0
 <Dec09-2020> <01:39:26>     12      0.00000274      0.00000114      0.0
 <Dec09-2020> <01:39:26>     13      0.00000005      0.00000002      0.0
 <Dec09-2020> <01:39:26>     14      0.00000000      0.00000000      0.0
 <Dec09-2020> <01:39:26>  SCF converged
 <Dec09-2020> <01:39:26>     15      0.00000000      0.00000000      0.0
 <Dec09-2020> <01:39:26>  >>>> POPAN
 <Dec09-2020> <01:39:26>  >>>> DEBYE
 <Dec09-2020> <01:39:26>  NORMAL TERMINATION
 <Dec09-2020> <01:39:26>  END
NORMAL TERMINATION

 *******************************************************************************
 *                                                                             *
 *  -------------------------------------                                      *
 *   Amsterdam Density Functional  (ADF)         2017                          *
 *  -------------------------------------                                      *
 *                                               r58813 2017-04-12             *
 *                                                                             *
 *                                                                             *
 *                            =====================                            *
 *                            |                   |                            *
 *                            |     D I R A C     |                            *
 *                            |                   |                            *
 *                            =====================                            *
 *                                                                             *
 *                                                                             *
 *   Online information and documentation:  https://www.scm.com/support/       *
 *   E-mail:  support@scm.com   info@scm.com                                   *
 *                                                                             *
 *   Scientific publications using ADF results must be properly referenced     *
 *   See the User Manuals (or the web site) for recommended citations          *
 *   The terms and conditions of the End User License Agreement apply to       *
 *   the use of ADF, https://www.scm.com/license-terms/                        *
 *                                                                             *
 **********************  x86_64_linux_intel / intelmpi  ************************
 
 Licensed to: SURF-SARA, Comp. & Networking Services / Amsterdam / NL
 SCM User ID: u7409
  
 DIRAC 2017  RunTime: Dec09-2020 01:39:26  Nodes: 1  Procs: 1

 Temporary files are created in /scratch/kid_0.1kusa4

1
 CARBON ATOM all electron RELATIVISTIC, Point Nuc, A and c fr
 N J RN H ZN XION ANUC CLIGHT
 5000    4100.00000000197.36710137  6.00000000  0.00000000   12.000000  0.1370360E+03
  PH   PHI     EPS        DEL        DELRVR
  0.30  0.30     2500.00  0.00001000  0.00001000
 IDIRC  NC1  NDEBU NPRIN  IPUN IRCOR IWCOR
   1   300     0     0     0     0     0
   XALPHA      XLATTER      RNUC
  0.70000000  0.00000000  0.00000000 Point Charge
   XN   XL   XJ      XE          XZ      XDELL
  1.0  0.0  0.5      -5.000       2.000     0.00000
  2.0  0.0  0.5      -1.000       2.000     0.00000
  2.0  1.0  0.5      -1.000       2.000     0.00000
  2.0  1.0  1.5      -1.000       0.000     0.00000
 ICORP=  0  NPCL=  0  DEMP=0.00  PEPS=0.000000
 R(1)=  0.1000000E-08 D=  0.1005080E+01 RNUC=  0.0000000E+00
 converged at cycle   26  DENSITY AVERAGING    0.3000
  MAXIMUM ERROR IN R.V(R) IS   0.55010513E-05
 Q,EY,EV,EZ,ESUM,ETOT,RHO  0.600000E+01 -0.610129E+01 -0.585189E+02 -0.876464E+02 -0.211985E+02 -0.372876E+02  0.164808E-14


 DIRAC CALCULATION
1                    CARBON ATOM all electron RELATIVISTIC, Point Nuc, A and c from libtc


 EXCHANGE COEFFICIENT=  0.7000000           TAIL CORRECTION=  0.           NUCLEAR RADIUS=  0.000E+00
0                       ORBITAL    N    L    J     ELECTRONS     EIGENVALUE                DELTA OF EIGENV.

                          1S1/2  1.0  0.0  0.5     2.000       -0.9959611E+01                 0.1355092E-04
                          2S1/2  2.0  0.0  0.5     2.000       -0.4708542E+00                 0.1106918E-05
                          2P1/2  2.0  1.0  0.5     2.000       -0.1687896E+00                 0.8770186E-06
                          2P3/2  2.0  1.0  1.5     0.000       -0.1684646E+00                 0.8770830E-06


                                        NUCLEAR CHARGE=    6.000000
                            INTEGRAL OF CHARGE DENSITY=    6.000000
                           SUM OF THE ORBITAL ENERGIES=    -21.1985
                                          TOTAL ENERGY=    -37.2876
                                        KINETIC ENERGY=     37.3204
                             NUCLEAR ATTRACTION ENERGY=    -87.6464
                             ELECTRON REPULSION ENERGY=     17.6144
                                       EXCHANGE ENERGY=     -4.5760

 *******************************************************************************

                             D I R A C   E X I T
 NORMAL TERMINATION


 =================
 Timing Statistics
 =================
  
 Total Used :                     CPU=        0.06      System=        0.01     Elapsed=        0.08

 Calls  Section                     ( Mean, Percentage )
 ---------------------------------------------------------------------------------------------------
     2  ><      ................      0.00    0.01             0.00    0.06             0.00    0.01
     1  EXIT PROCEDURE .........      0.06   99.99             0.01   99.94             0.08   99.99


 Currently Open Files (EXIT00)
 ====================

 Unit    Access Format  Status   Type       Ident (file)
 -------------------------------------------------------
   3      SEQ    FORM   TRANSP  NORMAL      LOGFILE
                                          ( logfile )


 Buffered I/O statistics
 =======================
 Memory available:                     67108864
 Number of records fitting in memory:     16131
 Input : 100.0% of                            0  *4k bytes
 Output: 100.0% of                            0  *4k bytes
 Records from serial files evicted:           0
                    others evicted:           0
 Hash table lookups:          0 with          0 conflicts (100.00%)
NORMAL TERMINATION

Create C   file=TZ2P-C
XC
  GGA PBE
End
relativistic ZORA
HartreeFock
Corepotentials t12.rel
End Input

 *******************************************************************************
 *                                                                             *
 *  -------------------------------------                                      *
 *   Amsterdam Density Functional  (ADF)         2017                          *
 *  -------------------------------------                                      *
 *                                               r58813 2017-04-12             *
 *                                                                             *
 *                                                                             *
 *                              =================                              *
 *                              |               |                              *
 *                              |     A D F     |                              *
 *                              |               |                              *
 *                              =================                              *
 *                                                                             *
 *                                                                             *
 *   Online information and documentation:  https://www.scm.com/support/       *
 *   E-mail:  support@scm.com   info@scm.com                                   *
 *                                                                             *
 *   Scientific publications using ADF results must be properly referenced     *
 *   See the User Manuals (or the web site) for recommended citations          *
 *   The terms and conditions of the End User License Agreement apply to       *
 *   the use of ADF, https://www.scm.com/license-terms/                        *
 *                                                                             *
 **********************  x86_64_linux_intel / intelmpi  ************************
 
 Licensed to: SURF-SARA, Comp. & Networking Services / Amsterdam / NL
 SCM User ID: u7409
  
 ADF 2017  RunTime: Dec09-2020 01:39:26  Nodes: 1  Procs: 1

 Temporary files are created in /scratch/kid_0.85ojzg

 Carbon (TZ2P)


 ===========================
 A T T A C H E D   F I L E S
 ===========================
  
 CREATE - Data File:    TZ2P-C
                        Carbon (TZ2P)
 Core Potentials:
         file : t12.rel


 ===============================
 M O D E L   P A R A M E T E R S
 ===============================
  
 DENSITY FUNCTIONAL POTENTIAL (scf)
    LDA:                               PW92                                    == Not Default ==
    Gradient Corrections:              PBEc PBEx                               == Not Default ==

 SPIN  (restricted / unrestr.)
    Molecule:                          Restricted                               

 OTHER ASPECTS
    Relativistic Corrections:          scalar (ZORA,MAPA)                      == Not Default ==

    Nuclear Charge Density Model:      Point Charge Nuclei                      
    Core Treatment:                    Frozen Orbital(s)                        

    Hyperfine or Zeeman Interaction:   ---                                      


 =====================================
 S Y M M E T R Y ,   E L E C T R O N S
 =====================================
  
 Symmetry: ATOM

 Irreducible Representations, including subspecies
 -------------------------------------------------
 S
 P:x  P:y  P:z
 D:z2  D:x2-y2  D:xy  D:xz  D:yz
 F:z3  F:z  F:xyz  F:z2x  F:z2y  F:x  F:y


 Configuration of Valence Electrons
 ==================================

          Occupation Numbers
          -------------------------------------------------
 S        2*2
 P        2
 D        0
 F        0
          -------------------------------------------------

 Total:   6

 Net Charge: 0 (Nuclei minus Electrons)

 Preset values for MO occupations will be applied through SCF cycle no. 1000000
 Thereafter, the program will assign electrons to MOs that are spatially
 similar to the occupied MOs in a "reference" cycle ("KeepOrbitals").
 The reference cycle is always the PREVIOUS cycle: it will evolve with
 the SCF procedure.


 ================================
 (Slater-type)  F U N C T I O N S  ***  (Basis and Fit)  ***
 ================================
  

 Atom Type    1  (C)
 ==============

 Valence Basis Sets:  10
 -----------------------
   1 S    7.680000
   1 S    5.000000
   2 S    1.280000
   2 S    2.100000
   2 S    4.600000
   2 P    0.820000
   2 P    1.480000
   2 P    2.940000
   3 D    2.200000
   4 F    3.300000


 BAS: List of all Elementary Cartesian Basis Functions
 =====================================================

 The numbering in the list below (to the right of the function characteristics) is referred
 to in print-outs of MO eigenvectors and Mulliken populations in the BAS representation
 (as contrasted to the SFO representation).

 Notes:
 1. The functions are characterized by a polynomial prefactor (powers of x,y,z and r) and
    an exponential decay factor alpha.
 2. Since the basis sets are specific for an atom TYPE, the individual functions occur on
    all atoms of that type.
 3. The word 'Core' in the left margin signals that it is a Core Function (CF) : not a
    degree of freedom in the valence set, but only used to ensure orthogonalization of
    the other valence basis functions on the frozen Core Orbitals.


 (power of) X  Y  Z  R     Alpha  on Atom
            ==========     =====     ==========

 C                                    1
                                  ---------------------------------------------------------------------------
            0  0  0  0     7.680      1
            0  0  0  0     5.000      2
            0  0  0  1     1.280      3
            0  0  0  1     2.100      4
            0  0  0  1     4.600      5
            1  0  0  0     0.820      6
            0  1  0  0     0.820      7
            0  0  1  0     0.820      8
            1  0  0  0     1.480      9
            0  1  0  0     1.480     10
            0  0  1  0     1.480     11
            1  0  0  0     2.940     12
            0  1  0  0     2.940     13
            0  0  1  0     2.940     14
            2  0  0  0     2.200     15
            1  1  0  0     2.200     16
            1  0  1  0     2.200     17
            0  2  0  0     2.200     18
            0  1  1  0     2.200     19
            0  0  2  0     2.200     20
            3  0  0  0     3.300     21
            2  1  0  0     3.300     22
            2  0  1  0     3.300     23
            1  2  0  0     3.300     24
            1  1  1  0     3.300     25
            1  0  2  0     3.300     26
            0  3  0  0     3.300     27
            0  2  1  0     3.300     28
            0  1  2  0     3.300     29
            0  0  3  0     3.300     30

 Total number of charge fitting functions (nprimf)        84
 Total number of Cartesian basis functions (naos)         30
 Total number of Cartesian core functions  (ncos)          0


 BAS: List of all Elementary Cartesian Basis Functions
 =====================================================

 The numbering in the list below (to the right of the function characteristics) is referred
 to in print-outs of MO eigenvectors and Mulliken populations in the BAS representation
 (as contrasted to the SFO representation).

 Notes:
 1. The functions are characterized by a polynomial prefactor (powers of x,y,z and r) and
    an exponential decay factor alpha.
 2. Since the basis sets are specific for an atom TYPE, the individual functions occur on
    all atoms of that type.
 3. The word 'Core' in the left margin signals that it is a Core Function (CF) : not a
    degree of freedom in the valence set, but only used to ensure orthogonalization of
    the other valence basis functions on the frozen Core Orbitals.


 (power of) X  Y  Z  R     Alpha  on Atom
            ==========     =====     ==========

 C                                    1
                                  ---------------------------------------------------------------------------
            0  0  0  0     7.680      1
            0  0  0  0     5.000      2
            0  0  0  1     1.280      3
            0  0  0  1     2.100      4
            0  0  0  1     4.600      5
            1  0  0  0     0.820      6
            0  1  0  0     0.820      7
            0  0  1  0     0.820      8
            1  0  0  0     1.480      9
            0  1  0  0     1.480     10
            0  0  1  0     1.480     11
            1  0  0  0     2.940     12
            0  1  0  0     2.940     13
            0  0  1  0     2.940     14
            2  0  0  0     2.200     15
            1  1  0  0     2.200     16
            1  0  1  0     2.200     17
            0  2  0  0     2.200     18
            0  1  1  0     2.200     19
            0  0  2  0     2.200     20
            3  0  0  0     3.300     21
            2  1  0  0     3.300     22
            2  0  1  0     3.300     23
            1  2  0  0     3.300     24
            1  1  1  0     3.300     25
            1  0  2  0     3.300     26
            0  3  0  0     3.300     27
            0  2  1  0     3.300     28
            0  1  2  0     3.300     29
            0  0  3  0     3.300     30
1
 ***************************************************************************************************


                                              ***********************
                                              *  T E C H N I C A L  *
                                              ***********************
  


 =============================================================
 P A R A L L E L I Z A T I O N  and  V E C T O R I Z A T I O N
 =============================================================
  
 Nr of parallel processes:                                1
 Maximum vector length in NumInt loops:                 128

 IO buffersize (Mb):                                     64.000000


 =====================
 S C F   U P D A T E S
 =====================
  
 Max. nr. of cycles:                               300
 Convergence criterion:                              0.0000000100
   secondary criterion:                              0.0000000100

 Mix parameter (when DIIS does not apply):           0.2000000000
 Special mix parameter for the first cycle:          1.0000000000
 Mixed ADIIS+DIIS will be used
    Max number of expansion vectors:                10
    Pure ADIIS when Max([F,P]) is above              0.1000000000
    Pure DIIS when Max([F,P]) is below               0.0010000000
 Automatic ElectronSmearing (in case of problematic SCF convergence) disabled


 =================
 P R E C I S I O N  ***  (General: NumInt, NeglectFunctionTails, ...)  ***
 =================
  

 NumInt:           Target precision:                12.0000000000
 -------           Initial precision:               10.0000000000
                   Min. precision (optimization):   10.0000000000

 Neglect Functions:          Basis functions:        0.1000000000E-13
 ------------------          Fit functions:          0.1000000000E-13


 ===========================
 L I N E A R   S C A L I N G
 ===========================
  

 Cut-off radii density fit:                        0.1000000000E-97
 Overlap cut-off criterion AO matrix elements:     0.1000000000E-97
 Cut-offs for Coulomb potential and fitted density:0.1000000000E-97
 Cut-off criterion for Coulomb multipole terms:    0.1000000000E-97
 Progressive Convergence parameter:                 0.000000000    
1
 ***************************************************************************************************


                                            ***************************
                                            *  C O M P U T A T I O N  *
                                            ***************************
  

 Number of elements of the density matrix on this node (used, total):       465       465


 ===========================================
 Numerical Integration : Fuzzy Cells (Becke)
 ===========================================
  
 Becke grid quality: VERYGOOD       
  
 Lebedev angular grid order:             min:  13 max:  41
 Nr. of radial points:                   min:  72 max:  72

 Total nr. of points:         72
 Nr. of blocks:                1
 Block length:                72
 Nr. of dummy points:          0


 Test of Precision of the Numerical Integration Grid
 ===================================================

 Integral of the Total Core Density:                   0.00000000000000


 ========================
 Density Fitting (zlmFit)
 ========================
  
 ZlmFit Fit Quality: VERYGOOD       
  
 Max L-expansion:                        min:   0 max:   0
 Nr. of radial interpolation points:     min: 160 max: 160


 =====
 S C F  ***  ScaSCF  ***
 =====
  

 CYCLE    1
 SCF Error: norm([F,P])=      0.000000000000, max([F,P])=      0.000000000000
 orbitals (Q,E):
 ---------------
 S :1...5            ( 2.00   -18.0043)  ( 2.00    -4.4778)  ( 0.00    -1.9487)  ( 0.00     0.6764)
                     ( 0.00    42.5219)
 P :1...3            ( 2.00    -4.5000)  ( 0.00    -1.9811)  ( 0.00    -1.0851)
 D :1...1            ( 0.00    -1.9800)
 F :1...1            ( 0.00     0.4946)

 CYCLE    2
  SDIIS (wt  0.000):  1.0000 -0.0000
 A-DIIS (wt  1.000):  0.0000  1.0000
  DIIS coefficients:  0.0000  1.0000
 SCF Error: norm([F,P])=      4.504248014088, max([F,P])=      3.336725253580
 orbitals (Q,E):
 ---------------
 S :1...3            ( 2.00    -7.7636)  ( 2.00    -0.0273)  ( 0.00     0.8585)
 P :1...2            ( 2.00     0.1276)  ( 0.00     0.5906)
 D :1...1            ( 0.00     1.7635)
 F :1...1            ( 0.00     4.6353)

 CYCLE    3
  SDIIS (wt  0.000):  0.2135  0.7865
 A-DIIS (wt  1.000):  0.0951  0.9049
  DIIS coefficients:  0.0951  0.9049
 SCF Error: norm([F,P])=      1.598641295360, max([F,P])=      1.299865175390
 orbitals (Q,E):
 ---------------
 S :1...3            ( 2.00   -11.0442)  ( 2.00    -0.9652)  ( 0.00     0.1078)
 P :1...2            ( 2.00    -0.6605)  ( 0.00     0.0134)
 D :1...1            ( 0.00     0.8190)
 F :1...1            ( 0.00     3.5399)

 CYCLE    4
  SDIIS (wt  0.000): -0.0686  0.2255  0.8431
 A-DIIS (wt  1.000):  0.0000  0.0975  0.9025
  DIIS coefficients:  0.0000  0.0975  0.9025
 SCF Error: norm([F,P])=      0.757185849772, max([F,P])=      0.611521671871
 orbitals (Q,E):
 ---------------
 S :1...3            ( 2.00    -9.6252)  ( 2.00    -0.3730)  ( 0.00     0.4689)
 P :1...2            ( 2.00    -0.0787)  ( 0.00     0.2472)
 D :1...1            ( 0.00     1.3641)
 F :1...1            ( 0.00     4.1588)

 CYCLE    5
  SDIIS (wt  0.000): -0.0210 -0.0620  0.3481  0.7349
 A-DIIS (wt  1.000):  0.0000  0.0000  0.1855  0.8145
  DIIS coefficients:  0.0000  0.0000  0.1855  0.8145
 SCF Error: norm([F,P])=      0.377258149771, max([F,P])=      0.304834017371
 orbitals (Q,E):
 ---------------
 S :1...3            ( 2.00   -10.2267)  ( 2.00    -0.5859)  ( 0.00     0.3251)
 P :1...2            ( 2.00    -0.2708)  ( 0.00     0.1396)
 D :1...1            ( 0.00     1.1599)
 F :1...1            ( 0.00     3.9221)

 CYCLE    6
  SDIIS (wt  0.000):  0.0026 -0.0126 -0.0849  0.2523  0.8425
 A-DIIS (wt  1.000):  0.0000  0.0000  0.0000  0.0590  0.9410
  DIIS coefficients:  0.0000  0.0000  0.0000  0.0590  0.9410
 SCF Error: norm([F,P])=      0.155944681388, max([F,P])=      0.122417410719
 orbitals (Q,E):
 ---------------
 S :1...3            ( 2.00    -9.9299)  ( 2.00    -0.4620)  ( 0.00     0.4056)
 P :1...2            ( 2.00    -0.1542)  ( 0.00     0.1926)
 D :1...1            ( 0.00     1.2775)
 F :1...1            ( 0.00     4.0563)

 CYCLE    7
  SDIIS (wt  0.168):  0.0001  0.0023 -0.0075 -0.1316  0.3017  0.8350
 A-DIIS (wt  0.832):  0.0000  0.0000  0.0000  0.0000  0.2920  0.7080
  DIIS coefficients:  0.0000  0.0004 -0.0013 -0.0221  0.2936  0.7293
 SCF Error: norm([F,P])=      0.105416662228, max([F,P])=      0.083411860504
 orbitals (Q,E):
 ---------------
 S :1...3            ( 2.00   -10.0703)  ( 2.00    -0.5161)  ( 0.00     0.3698)
 P :1...2            ( 2.00    -0.2040)  ( 0.00     0.1673)
 D :1...1            ( 0.00     1.2259)
 F :1...1            ( 0.00     3.9970)

 CYCLE    8
  SDIIS (wt  0.840): -0.0000  0.0003  0.0006 -0.0137 -0.0385  0.1707  0.8807
 A-DIIS (wt  0.160):  0.0000  0.0000  0.0000  0.0000  0.0000  0.0000  1.0000
  DIIS coefficients: -0.0000  0.0002  0.0005 -0.0115 -0.0323  0.1433  0.8998
 SCF Error: norm([F,P])=      0.021423375961, max([F,P])=      0.016868570813
 orbitals (Q,E):
 ---------------
 S :1...3            ( 2.00   -10.0430)  ( 2.00    -0.5049)  ( 0.00     0.3772)
 P :1...2            ( 2.00    -0.1934)  ( 0.00     0.1722)
 D :1...1            ( 0.00     1.2365)
 F :1...1            ( 0.00     4.0092)

 CYCLE    9
  SDIIS (wt  0.987): -0.0000  0.0000  0.0005 -0.0017 -0.0010 -0.0044  0.0718  0.9348
 A-DIIS (wt  0.013):  0.0000  0.0000  0.0000  0.0000  0.0000  0.0000  0.0000  1.0000
  DIIS coefficients: -0.0000  0.0000  0.0004 -0.0016 -0.0010 -0.0044  0.0708  0.9357
 SCF Error: norm([F,P])=      0.002894575837, max([F,P])=      0.002292658631
 orbitals (Q,E):
 ---------------
 S :1...3            ( 2.00   -10.0463)  ( 2.00    -0.5062)  ( 0.00     0.3764)
 P :1...2            ( 2.00    -0.1946)  ( 0.00     0.1716)
 D :1...1            ( 0.00     1.2353)
 F :1...1            ( 0.00     4.0078)

 CYCLE   10
  SDIIS (wt  1.000):  0.0000  0.0000 -0.0000 -0.0002  0.0004  0.0019  0.0010 -0.0152  1.0122
  DIIS coefficients:  0.0000  0.0000 -0.0000 -0.0002  0.0004  0.0019  0.0010 -0.0152  1.0122
 SCF Error: norm([F,P])=      0.000034784020, max([F,P])=      0.000027638557
 orbitals (Q,E):
 ---------------
 S :1...3            ( 2.00   -10.0462)  ( 2.00    -0.5062)  ( 0.00     0.3764)
 P :1...2            ( 2.00    -0.1946)  ( 0.00     0.1716)
 D :1...1            ( 0.00     1.2353)
 F :1...1            ( 0.00     4.0078)

 CYCLE   11
  SDIIS (wt  1.000):  0.0000  0.0000 -0.0000 -0.0000  0.0005 -0.0152  1.0147
  DIIS coefficients:  0.0000  0.0000 -0.0000 -0.0000  0.0005 -0.0152  1.0147
 SCF Error: norm([F,P])=      0.000000087702, max([F,P])=      0.000000073698
 orbitals (Q,E):
 ---------------
 S :1...3            ( 2.00   -10.0462)  ( 2.00    -0.5062)  ( 0.00     0.3764)
 P :1...2            ( 2.00    -0.1946)  ( 0.00     0.1716)
 D :1...1            ( 0.00     1.2353)
 F :1...1            ( 0.00     4.0078)

 CYCLE   12
  SDIIS (wt  1.000): -0.0000  0.0001 -0.0132  1.0131
  DIIS coefficients: -0.0000  0.0001 -0.0132  1.0131
 SCF Error: norm([F,P])=      0.000000003338, max([F,P])=      0.000000002501
 orbitals (Q,E):
 ---------------
 S :1...3            ( 2.00   -10.0462)  ( 2.00    -0.5062)  ( 0.00     0.3764)
 P :1...2            ( 2.00    -0.1946)  ( 0.00     0.1716)
 D :1...1            ( 0.00     1.2353)
 F :1...1            ( 0.00     4.0078)

 SCF CONVERGED

 CYCLE   13
1
 ***************************************************************************************************


                                                *******************
                                                *  R E S U L T S  *
                                                *******************
  
  
 Hartree-Fock exchange energy:   -4.65117241890225     
 *** Setting up for NEW gradients in Focky
 *** Using FIT density in Focky

 Scaled ZORA Orbital Energies, per Irrep and Spin:
 =================================================
                        Occup              E (au)              E (eV)       Diff (eV) with prev. cycle
                        -----      --------------------        ------       --------------------------
 S
               1        2.000     -0.10046243090602E+02      -273.372              -3.47E-09
               2        2.000     -0.50615057529252E+00       -13.773              -2.14E-09
               3        0.000      0.37636350174776E+00        10.241
               4        0.000      0.54260724623190E+01       147.651
               5        0.000      0.49901831679842E+02      1357.898
 P
               1        2.000     -0.19462885662887E+00        -5.296              -2.01E-09
               2        0.000      0.17159156222919E+00         4.669
               3        0.000      0.20275722516901E+01        55.173
 D
               1        0.000      0.12353389027293E+01        33.615
 F
               1        0.000      0.40078091367494E+01       109.058


 Partially Occupied:
               1 P                -0.19462885662887E+00
  
 HOMO :        2 S                -0.50615057529252E+00
 LUMO :        2 P                 0.17159156222919E+00
  


 Orbital Energies, all Irreps
 ========================================

 Irrep        no.  (spin)   Occup              E (au)                E (eV)
 ---------------------------------------------------------------------------
 S             1             2.00       -0.10046243090602E+02      -273.3722
 S             2             2.00       -0.50615057529252E+00       -13.7731
 P             1             2.00       -0.19462885662887E+00        -5.2961
 P             2             0.00        0.17159156222919E+00         4.6692
 S             3             0.00        0.37636350174776E+00        10.2414
 D             1             0.00        0.12353389027293E+01        33.6153
 P             3             0.00        0.20275722516901E+01        55.1730
 F             1             0.00        0.40078091367494E+01       109.0580
 S             4             0.00        0.54260724623190E+01       147.6509
 S             5             0.00        0.49901831679842E+02      1357.8979


 All Electron Calculation, thus no Orbital Energies of the Core Orbitals are calculated


 =======================================
 M U L L I K E N   P O P U L A T I O N S
 =======================================
  
 The survey below gives for each atom:
 a) the total charge (Z minus electrons)
 b) the net spin polarization (nr of electrons spin-A minus spin-B)
 c) for each spin the atomic electron valence density (integrated) per L-value.

 Atom              Charge    Spin density          S         P         D         F
 ----              ------    ------------       ------    ------    ------    ------
 1 C               0.0000                       4.0000    2.0000    0.0000    0.0000

 Populations of individual BAS functions
 ----------------------------------------
 1 C            0.4934  1.5043  0.9274  1.1304 -0.0555  0.1738  0.1738  0.1738  0.3895  0.3895
                0.3895  0.1034  0.1034  0.1034  0.0000  0.0000  0.0000  0.0000  0.0000  0.0000
                0.0000  0.0000  0.0000  0.0000  0.0000  0.0000  0.0000  0.0000  0.0000  0.0000

 Gross Charges per Atom (Z minus electrons)
 ==========================================
             0.0000
 Net Total:  0.00000000


 =======================================================================
 Electrostatic potential at the Nuclei due to electrons and other nuclei
 =======================================================================
  
         Atom                  Potential
         ----                  ---------
     1)   C                  14.67531420
 
 
 ========================
 No memory problems found
 ========================
 
 Maximum number of active allocate calls:         480
 
 *******************************************************************************

                             A D F   E X I T
 NORMAL TERMINATION


 =================
 Timing Statistics
 =================
  
 Total Used :                     CPU=        0.31      System=        0.02     Elapsed=        0.40

 Calls  Section                     ( Mean, Percentage )
 ---------------------------------------------------------------------------------------------------
     3  ><      ................      0.00    0.18             0.00    1.29             0.00    0.77
     1  INIT    ................      0.01    3.02             0.01   25.50             0.02    6.15
     1  GEOMET  ................      0.00    1.24             0.00   14.32             0.02    3.83
     1  INPUTA  ................      0.00    0.38             0.00    2.72             0.00    0.58
     1  MAINSY  ................      0.01    2.01             0.00    4.20             0.01    3.10
     1  SYMFIT  ................      0.00    0.01             0.00    4.31             0.00    0.24
     1  CORORT  ................      0.00    0.00             0.00    1.80             0.00    0.42
     1  SYMORB  ................      0.00    0.00             0.00    4.22             0.00    0.23
     1  FITINT  ................      0.01    2.14             0.00    7.60             0.01    2.45
     1  CLSMAT  ................      0.00    0.22             0.00    0.00             0.00    0.47
     1  ORTHON  ................      0.00    0.41             0.00    0.00             0.00    0.59
     1  GENPT   ................      0.01    2.65             0.00    9.46             0.01    3.24
     1  PTBAS   ................      0.00    0.59             0.00    7.08             0.00    1.19
    13  FOCKY   ................      0.02   70.45             0.00    9.50             0.02   56.58
    13  FOCKTR  ................      0.00    2.24             0.00    2.97             0.00    1.92
    13  SDIIS   ................      0.00    4.70             0.00    5.04             0.00    8.71
     1  COREPS  ................      0.01    4.07             0.00    0.00             0.01    3.20
     1  POPAN   ................      0.00    1.18             0.00    0.00             0.01    1.27
     1  DEBYE   ................      0.00    0.14             0.00    0.00             0.00    0.39
     1  EXIT PROCEDURE .........      0.01    4.38             0.00    0.00             0.02    4.67


 Currently Open Files (EXIT00)
 ====================

 Unit    Access Format  Status   Type       Ident (file)
 -------------------------------------------------------
   3      SEQ    FORM   TRANSP  NORMAL      LOGFILE
                                          ( logfile )


 Buffered I/O statistics
 =======================
 Memory available:                     67108864
 Number of records fitting in memory:     16131
 Input :   0.1% of                        32775  *4k bytes
 Output:  15.4% of                         1510  *4k bytes
 Records from serial files evicted:           0
                    others evicted:           0
 Hash table lookups:      85112 with          0 conflicts (  0.00%)

 ***************************************************************************************************
 (LOGFILE)
 <Dec09-2020> <01:39:24>  DIRAC 2017  RunTime: Dec09-2020 01:39:24  Nodes: 1  Procs: 1
 <Dec09-2020> <01:39:24>  NORMAL TERMINATION
 <Dec09-2020> <01:39:24>  END
 <Dec09-2020> <01:39:24>  ADF 2017  RunTime: Dec09-2020 01:39:24  Nodes: 1  Procs: 1
 <Dec09-2020> <01:39:24>  Hydrogen (TZ2P)
 <Dec09-2020> <01:39:24>  RunType   : CREATE
 <Dec09-2020> <01:39:24>  Net Charge: 0 (Nuclei minus Electrons)
 <Dec09-2020> <01:39:24>  Symmetry  : ATOM
  Coordinates
    Atom         X           Y           Z   (Angstrom)
    1.H         0.000000    0.000000    0.000000
 <Dec09-2020> <01:39:24>  >>>> CORORT
 <Dec09-2020> <01:39:24>  >>>> FITINT
 <Dec09-2020> <01:39:24>  >>>> CLSMAT
 <Dec09-2020> <01:39:24>  >>>> ORTHON
 <Dec09-2020> <01:39:24>  >>>> GENPT
 <Dec09-2020> <01:39:24>  Block Length=  64
 <Dec09-2020> <01:39:24>  >>>> PTBAS
 <Dec09-2020> <01:39:24>  >>>> CYCLE
 <Dec09-2020> <01:39:24>              |Error|         MaxErr       Wt(A-DIIS)
 <Dec09-2020> <01:39:24>      1      0.00000000      0.00000000
 <Dec09-2020> <01:39:24>      2      0.03155047      0.03012130
 <Dec09-2020> <01:39:24>      3      0.00862036      0.00834572    100.0
 <Dec09-2020> <01:39:24>      4      0.00173320      0.00171953      0.7
 <Dec09-2020> <01:39:24>      5      0.00004372      0.00003982      0.0
 <Dec09-2020> <01:39:24>      6      0.00000239      0.00000216      0.0
 <Dec09-2020> <01:39:24>      7      0.00000001      0.00000001      0.0
 <Dec09-2020> <01:39:24>  SCF converged
 <Dec09-2020> <01:39:24>      8      0.00000000      0.00000000      0.0
 <Dec09-2020> <01:39:24>  >>>> POPAN
 <Dec09-2020> <01:39:24>  >>>> DEBYE
 <Dec09-2020> <01:39:24>  NORMAL TERMINATION
 <Dec09-2020> <01:39:24>  END
 <Dec09-2020> <01:39:24>  DIRAC 2017  RunTime: Dec09-2020 01:39:24  Nodes: 1  Procs: 1
 <Dec09-2020> <01:39:24>  NORMAL TERMINATION
 <Dec09-2020> <01:39:24>  END
 <Dec09-2020> <01:39:25>  ADF 2017  RunTime: Dec09-2020 01:39:25  Nodes: 1  Procs: 1
 <Dec09-2020> <01:39:25>  Nitrogen (TZ2P)
 <Dec09-2020> <01:39:25>  RunType   : CREATE
 <Dec09-2020> <01:39:25>  Net Charge: 0 (Nuclei minus Electrons)
 <Dec09-2020> <01:39:25>  Symmetry  : ATOM
  Coordinates
    Atom         X           Y           Z   (Angstrom)
    1.N         0.000000    0.000000    0.000000
 <Dec09-2020> <01:39:25>  >>>> CORORT
 <Dec09-2020> <01:39:25>  >>>> FITINT
 <Dec09-2020> <01:39:25>  >>>> CLSMAT
 <Dec09-2020> <01:39:25>  >>>> ORTHON
 <Dec09-2020> <01:39:25>  >>>> GENPT
 <Dec09-2020> <01:39:25>  Block Length=  72
 <Dec09-2020> <01:39:25>  >>>> PTBAS
 <Dec09-2020> <01:39:25>  >>>> CYCLE
 <Dec09-2020> <01:39:25>              |Error|         MaxErr       Wt(A-DIIS)
 <Dec09-2020> <01:39:25>      1      0.00000000      0.00000000
 <Dec09-2020> <01:39:25>      2      6.47720093      4.24006811    100.0
 <Dec09-2020> <01:39:25>      3      2.46800817      1.94812547    100.0
 <Dec09-2020> <01:39:25>      4      1.00979984      0.66218778    100.0
 <Dec09-2020> <01:39:25>      5      0.78846124      0.54226444    100.0
 <Dec09-2020> <01:39:25>      6      0.08887211      0.05234604     51.9
 <Dec09-2020> <01:39:25>      7      0.05595493      0.03712600     36.5
 <Dec09-2020> <01:39:25>      8      0.00836694      0.00569520      4.7
 <Dec09-2020> <01:39:25>      9      0.00034439      0.00023023      0.0
 <Dec09-2020> <01:39:25>     10      0.00000401      0.00000238      0.0
 <Dec09-2020> <01:39:25>     11      0.00000004      0.00000002      0.0
 <Dec09-2020> <01:39:25>     12      0.00000000      0.00000000      0.0
 <Dec09-2020> <01:39:25>  SCF converged
 <Dec09-2020> <01:39:25>     13      0.00000000      0.00000000      0.0
 <Dec09-2020> <01:39:25>  >>>> POPAN
 <Dec09-2020> <01:39:25>  >>>> DEBYE
 <Dec09-2020> <01:39:25>  NORMAL TERMINATION
 <Dec09-2020> <01:39:25>  END
 <Dec09-2020> <01:39:25>  DIRAC 2017  RunTime: Dec09-2020 01:39:25  Nodes: 1  Procs: 1
 <Dec09-2020> <01:39:25>  NORMAL TERMINATION
 <Dec09-2020> <01:39:25>  END
 <Dec09-2020> <01:39:25>  ADF 2017  RunTime: Dec09-2020 01:39:25  Nodes: 1  Procs: 1
 <Dec09-2020> <01:39:25>  Sulphur (TZ2P)
 <Dec09-2020> <01:39:25>  RunType   : CREATE
 <Dec09-2020> <01:39:25>  Net Charge: 0 (Nuclei minus Electrons)
 <Dec09-2020> <01:39:25>  Symmetry  : ATOM
  Coordinates
    Atom         X           Y           Z   (Angstrom)
    1.S         0.000000    0.000000    0.000000
 <Dec09-2020> <01:39:25>  >>>> CORORT
 <Dec09-2020> <01:39:25>  >>>> FITINT
 <Dec09-2020> <01:39:25>  >>>> CLSMAT
 <Dec09-2020> <01:39:25>  >>>> ORTHON
 <Dec09-2020> <01:39:25>  >>>> GENPT
 <Dec09-2020> <01:39:25>  Block Length=  85
 <Dec09-2020> <01:39:25>  >>>> PTBAS
 <Dec09-2020> <01:39:25>  >>>> CYCLE
 <Dec09-2020> <01:39:25>              |Error|         MaxErr       Wt(A-DIIS)
 <Dec09-2020> <01:39:25>      1      0.00000000      0.00000000
 <Dec09-2020> <01:39:25>      2     30.56235076      9.99058795    100.0
 <Dec09-2020> <01:39:25>      3     19.19766278      5.09991672    100.0
 <Dec09-2020> <01:39:25>      4      5.70528361      1.91207544    100.0
 <Dec09-2020> <01:39:26>      5      4.44406738      1.94911571    100.0
 <Dec09-2020> <01:39:26>      6      0.78987575      0.33860374    100.0
 <Dec09-2020> <01:39:26>      7      0.72947378      0.33639287    100.0
 <Dec09-2020> <01:39:26>      8      0.05329152      0.02355028     22.8
 <Dec09-2020> <01:39:26>      9      0.01266669      0.00574634      4.8
 <Dec09-2020> <01:39:26>     10      0.00076690      0.00036163      0.0
 <Dec09-2020> <01:39:26>     11      0.00001783      0.00000564      0.0
 <Dec09-2020> <01:39:26>     12      0.00000274      0.00000114      0.0
 <Dec09-2020> <01:39:26>     13      0.00000005      0.00000002      0.0
 <Dec09-2020> <01:39:26>     14      0.00000000      0.00000000      0.0
 <Dec09-2020> <01:39:26>  SCF converged
 <Dec09-2020> <01:39:26>     15      0.00000000      0.00000000      0.0
 <Dec09-2020> <01:39:26>  >>>> POPAN
 <Dec09-2020> <01:39:26>  >>>> DEBYE
 <Dec09-2020> <01:39:26>  NORMAL TERMINATION
 <Dec09-2020> <01:39:26>  END
 <Dec09-2020> <01:39:26>  DIRAC 2017  RunTime: Dec09-2020 01:39:26  Nodes: 1  Procs: 1
 <Dec09-2020> <01:39:26>  NORMAL TERMINATION
 <Dec09-2020> <01:39:26>  END
 <Dec09-2020> <01:39:26>  ADF 2017  RunTime: Dec09-2020 01:39:26  Nodes: 1  Procs: 1
 <Dec09-2020> <01:39:26>  Carbon (TZ2P)
 <Dec09-2020> <01:39:26>  RunType   : CREATE
 <Dec09-2020> <01:39:26>  Net Charge: 0 (Nuclei minus Electrons)
 <Dec09-2020> <01:39:26>  Symmetry  : ATOM
  Coordinates
    Atom         X           Y           Z   (Angstrom)
    1.C         0.000000    0.000000    0.000000
 <Dec09-2020> <01:39:26>  >>>> CORORT
 <Dec09-2020> <01:39:26>  >>>> FITINT
 <Dec09-2020> <01:39:26>  >>>> CLSMAT
 <Dec09-2020> <01:39:26>  >>>> ORTHON
 <Dec09-2020> <01:39:26>  >>>> GENPT
 <Dec09-2020> <01:39:26>  Block Length=  72
 <Dec09-2020> <01:39:26>  >>>> PTBAS
 <Dec09-2020> <01:39:26>  >>>> CYCLE
 <Dec09-2020> <01:39:26>              |Error|         MaxErr       Wt(A-DIIS)
 <Dec09-2020> <01:39:26>      1      0.00000000      0.00000000
 <Dec09-2020> <01:39:26>      2      4.50424801      3.33672525    100.0
 <Dec09-2020> <01:39:26>      3      1.59864130      1.29986518    100.0
 <Dec09-2020> <01:39:26>      4      0.75718585      0.61152167    100.0
 <Dec09-2020> <01:39:26>      5      0.37725815      0.30483402    100.0
 <Dec09-2020> <01:39:26>      6      0.15594468      0.12241741    100.0
 <Dec09-2020> <01:39:26>      7      0.10541666      0.08341186     83.2
 <Dec09-2020> <01:39:26>      8      0.02142338      0.01686857     16.0
 <Dec09-2020> <01:39:26>      9      0.00289458      0.00229266      1.3
 <Dec09-2020> <01:39:26>     10      0.00003478      0.00002764      0.0
 <Dec09-2020> <01:39:26>     11      0.00000009      0.00000007      0.0
 <Dec09-2020> <01:39:26>     12      0.00000000      0.00000000      0.0
 <Dec09-2020> <01:39:26>  SCF converged
 <Dec09-2020> <01:39:26>     13      0.00000000      0.00000000      0.0
 <Dec09-2020> <01:39:26>  >>>> POPAN
 <Dec09-2020> <01:39:26>  >>>> DEBYE
 <Dec09-2020> <01:39:26>  NORMAL TERMINATION
 <Dec09-2020> <01:39:26>  END
NORMAL TERMINATION

 *******************************************************************************
 *                                                                             *
 *  -------------------------------------                                      *
 *   Amsterdam Density Functional  (ADF)         2017                          *
 *  -------------------------------------                                      *
 *                                               r58813 2017-04-12             *
 *                                                                             *
 *                                                                             *
 *                            =====================                            *
 *                            |                   |                            *
 *                            |     D I R A C     |                            *
 *                            |                   |                            *
 *                            =====================                            *
 *                                                                             *
 *                                                                             *
 *   Online information and documentation:  https://www.scm.com/support/       *
 *   E-mail:  support@scm.com   info@scm.com                                   *
 *                                                                             *
 *   Scientific publications using ADF results must be properly referenced     *
 *   See the User Manuals (or the web site) for recommended citations          *
 *   The terms and conditions of the End User License Agreement apply to       *
 *   the use of ADF, https://www.scm.com/license-terms/                        *
 *                                                                             *
 **********************  x86_64_linux_intel / intelmpi  ************************
 
 Licensed to: SURF-SARA, Comp. & Networking Services / Amsterdam / NL
 SCM User ID: u7409
  
 DIRAC 2017  RunTime: Dec09-2020 01:39:26  Nodes: 1  Procs: 1

 Temporary files are created in /scratch/kid_0.oeeoJO

1
 OXYGEN ATOM all electron RELATIVISTIC, Point Nuc, A and c fr
 N J RN H ZN XION ANUC CLIGHT
 5000    4100.00000000197.36710137  8.00000000  0.00000000   15.994914  0.1370360E+03
  PH   PHI     EPS        DEL        DELRVR
  0.30  0.30     2500.00  0.00001000  0.00001000
 IDIRC  NC1  NDEBU NPRIN  IPUN IRCOR IWCOR
   1   300     0     0     0     0     0
   XALPHA      XLATTER      RNUC
  0.70000000  0.00000000  0.00000000 Point Charge
   XN   XL   XJ      XE          XZ      XDELL
  1.0  0.0  0.5      -5.000       2.000     0.00000
  2.0  0.0  0.5      -1.000       2.000     0.00000
  2.0  1.0  0.5      -1.000       2.000     0.00000
  2.0  1.0  1.5      -1.000       2.000     0.00000
 ICORP=  0  NPCL=  0  DEMP=0.00  PEPS=0.000000
 R(1)=  0.1000000E-08 D=  0.1005080E+01 RNUC=  0.0000000E+00
 converged at cycle   28  DENSITY AVERAGING    0.2400
  MAXIMUM ERROR IN R.V(R) IS   0.81125670E-05
 Q,EY,EV,EZ,ESUM,ETOT,RHO  0.800000E+01 -0.101247E+02 -0.114961E+03 -0.177573E+03 -0.405053E+02 -0.743427E+02  0.414766E-14


 DIRAC CALCULATION
1                    OXYGEN ATOM all electron RELATIVISTIC, Point Nuc, A and c from libtc


 EXCHANGE COEFFICIENT=  0.7000000           TAIL CORRECTION=  0.           NUCLEAR RADIUS=  0.000E+00
0                       ORBITAL    N    L    J     ELECTRONS     EIGENVALUE                DELTA OF EIGENV.

                          1S1/2  1.0  0.0  0.5     2.000       -0.1880014E+02                 0.7264359E-06
                          2S1/2  2.0  0.0  0.5     2.000       -0.8412236E+00                 0.5932752E-05
                          2P1/2  2.0  1.0  0.5     2.000       -0.3063203E+00                 0.5998471E-05
                          2P3/2  2.0  1.0  1.5     2.000       -0.3049609E+00                 0.5986971E-05


                                        NUCLEAR CHARGE=    8.000000
                            INTEGRAL OF CHARGE DENSITY=    8.000000
                           SUM OF THE ORBITAL ENERGIES=    -40.5053
                                          TOTAL ENERGY=    -74.3427
                                        KINETIC ENERGY=     74.4552
                             NUCLEAR ATTRACTION ENERGY=   -177.5730
                             ELECTRON REPULSION ENERGY=     36.3686
                                       EXCHANGE ENERGY=     -7.5935

 *******************************************************************************

                             D I R A C   E X I T
 NORMAL TERMINATION


 =================
 Timing Statistics
 =================
  
 Total Used :                     CPU=        0.08      System=        0.00     Elapsed=        0.09

 Calls  Section                     ( Mean, Percentage )
 ---------------------------------------------------------------------------------------------------
     2  ><      ................      0.00    0.02             0.00    0.00             0.00    0.01
     1  EXIT PROCEDURE .........      0.08   99.98             0.00    0.00             0.09   99.99


 Currently Open Files (EXIT00)
 ====================

 Unit    Access Format  Status   Type       Ident (file)
 -------------------------------------------------------
   3      SEQ    FORM   TRANSP  NORMAL      LOGFILE
                                          ( logfile )


 Buffered I/O statistics
 =======================
 Memory available:                     67108864
 Number of records fitting in memory:     16131
 Input : 100.0% of                            0  *4k bytes
 Output: 100.0% of                            0  *4k bytes
 Records from serial files evicted:           0
                    others evicted:           0
 Hash table lookups:          0 with          0 conflicts (100.00%)
NORMAL TERMINATION

Create O   file=TZ2P-O
XC
  GGA PBE
End
relativistic ZORA
HartreeFock
Corepotentials t12.rel
End Input

 *******************************************************************************
 *                                                                             *
 *  -------------------------------------                                      *
 *   Amsterdam Density Functional  (ADF)         2017                          *
 *  -------------------------------------                                      *
 *                                               r58813 2017-04-12             *
 *                                                                             *
 *                                                                             *
 *                              =================                              *
 *                              |               |                              *
 *                              |     A D F     |                              *
 *                              |               |                              *
 *                              =================                              *
 *                                                                             *
 *                                                                             *
 *   Online information and documentation:  https://www.scm.com/support/       *
 *   E-mail:  support@scm.com   info@scm.com                                   *
 *                                                                             *
 *   Scientific publications using ADF results must be properly referenced     *
 *   See the User Manuals (or the web site) for recommended citations          *
 *   The terms and conditions of the End User License Agreement apply to       *
 *   the use of ADF, https://www.scm.com/license-terms/                        *
 *                                                                             *
 **********************  x86_64_linux_intel / intelmpi  ************************
 
 Licensed to: SURF-SARA, Comp. & Networking Services / Amsterdam / NL
 SCM User ID: u7409
  
 ADF 2017  RunTime: Dec09-2020 01:39:27  Nodes: 1  Procs: 1

 Temporary files are created in /scratch/kid_0.8rry0O

 Oxygen (TZ2P)


 ===========================
 A T T A C H E D   F I L E S
 ===========================
  
 CREATE - Data File:    TZ2P-O
                        Oxygen (TZ2P)
 Core Potentials:
         file : t12.rel


 ===============================
 M O D E L   P A R A M E T E R S
 ===============================
  
 DENSITY FUNCTIONAL POTENTIAL (scf)
    LDA:                               PW92                                    == Not Default ==
    Gradient Corrections:              PBEc PBEx                               == Not Default ==

 SPIN  (restricted / unrestr.)
    Molecule:                          Restricted                               

 OTHER ASPECTS
    Relativistic Corrections:          scalar (ZORA,MAPA)                      == Not Default ==

    Nuclear Charge Density Model:      Point Charge Nuclei                      
    Core Treatment:                    Frozen Orbital(s)                        

    Hyperfine or Zeeman Interaction:   ---                                      


 =====================================
 S Y M M E T R Y ,   E L E C T R O N S
 =====================================
  
 Symmetry: ATOM

 Irreducible Representations, including subspecies
 -------------------------------------------------
 S
 P:x  P:y  P:z
 D:z2  D:x2-y2  D:xy  D:xz  D:yz
 F:z3  F:z  F:xyz  F:z2x  F:z2y  F:x  F:y


 Configuration of Valence Electrons
 ==================================

          Occupation Numbers
          -------------------------------------------------
 S        2*2
 P        4
 D        0
 F        0
          -------------------------------------------------

 Total:   8

 Net Charge: 0 (Nuclei minus Electrons)

 Preset values for MO occupations will be applied through SCF cycle no. 1000000
 Thereafter, the program will assign electrons to MOs that are spatially
 similar to the occupied MOs in a "reference" cycle ("KeepOrbitals").
 The reference cycle is always the PREVIOUS cycle: it will evolve with
 the SCF procedure.


 ================================
 (Slater-type)  F U N C T I O N S  ***  (Basis and Fit)  ***
 ================================
  

 Atom Type    1  (O)
 ==============

 Valence Basis Sets:  10
 -----------------------
   1 S    9.800000
   1 S    6.800000
   2 S    7.580000
   2 S    2.880000
   2 S    1.720000
   2 P    4.080000
   2 P    2.080000
   2 P    1.120000
   3 D    2.000000
   4 F    3.000000


 BAS: List of all Elementary Cartesian Basis Functions
 =====================================================

 The numbering in the list below (to the right of the function characteristics) is referred
 to in print-outs of MO eigenvectors and Mulliken populations in the BAS representation
 (as contrasted to the SFO representation).

 Notes:
 1. The functions are characterized by a polynomial prefactor (powers of x,y,z and r) and
    an exponential decay factor alpha.
 2. Since the basis sets are specific for an atom TYPE, the individual functions occur on
    all atoms of that type.
 3. The word 'Core' in the left margin signals that it is a Core Function (CF) : not a
    degree of freedom in the valence set, but only used to ensure orthogonalization of
    the other valence basis functions on the frozen Core Orbitals.


 (power of) X  Y  Z  R     Alpha  on Atom
            ==========     =====     ==========

 O                                    1
                                  ---------------------------------------------------------------------------
            0  0  0  0     9.800      1
            0  0  0  0     6.800      2
            0  0  0  1     7.580      3
            0  0  0  1     2.880      4
            0  0  0  1     1.720      5
            1  0  0  0     4.080      6
            0  1  0  0     4.080      7
            0  0  1  0     4.080      8
            1  0  0  0     2.080      9
            0  1  0  0     2.080     10
            0  0  1  0     2.080     11
            1  0  0  0     1.120     12
            0  1  0  0     1.120     13
            0  0  1  0     1.120     14
            2  0  0  0     2.000     15
            1  1  0  0     2.000     16
            1  0  1  0     2.000     17
            0  2  0  0     2.000     18
            0  1  1  0     2.000     19
            0  0  2  0     2.000     20
            3  0  0  0     3.000     21
            2  1  0  0     3.000     22
            2  0  1  0     3.000     23
            1  2  0  0     3.000     24
            1  1  1  0     3.000     25
            1  0  2  0     3.000     26
            0  3  0  0     3.000     27
            0  2  1  0     3.000     28
            0  1  2  0     3.000     29
            0  0  3  0     3.000     30

 Total number of charge fitting functions (nprimf)        84
 Total number of Cartesian basis functions (naos)         30
 Total number of Cartesian core functions  (ncos)          0


 BAS: List of all Elementary Cartesian Basis Functions
 =====================================================

 The numbering in the list below (to the right of the function characteristics) is referred
 to in print-outs of MO eigenvectors and Mulliken populations in the BAS representation
 (as contrasted to the SFO representation).

 Notes:
 1. The functions are characterized by a polynomial prefactor (powers of x,y,z and r) and
    an exponential decay factor alpha.
 2. Since the basis sets are specific for an atom TYPE, the individual functions occur on
    all atoms of that type.
 3. The word 'Core' in the left margin signals that it is a Core Function (CF) : not a
    degree of freedom in the valence set, but only used to ensure orthogonalization of
    the other valence basis functions on the frozen Core Orbitals.


 (power of) X  Y  Z  R     Alpha  on Atom
            ==========     =====     ==========

 O                                    1
                                  ---------------------------------------------------------------------------
            0  0  0  0     9.800      1
            0  0  0  0     6.800      2
            0  0  0  1     7.580      3
            0  0  0  1     2.880      4
            0  0  0  1     1.720      5
            1  0  0  0     4.080      6
            0  1  0  0     4.080      7
            0  0  1  0     4.080      8
            1  0  0  0     2.080      9
            0  1  0  0     2.080     10
            0  0  1  0     2.080     11
            1  0  0  0     1.120     12
            0  1  0  0     1.120     13
            0  0  1  0     1.120     14
            2  0  0  0     2.000     15
            1  1  0  0     2.000     16
            1  0  1  0     2.000     17
            0  2  0  0     2.000     18
            0  1  1  0     2.000     19
            0  0  2  0     2.000     20
            3  0  0  0     3.000     21
            2  1  0  0     3.000     22
            2  0  1  0     3.000     23
            1  2  0  0     3.000     24
            1  1  1  0     3.000     25
            1  0  2  0     3.000     26
            0  3  0  0     3.000     27
            0  2  1  0     3.000     28
            0  1  2  0     3.000     29
            0  0  3  0     3.000     30
1
 ***************************************************************************************************


                                              ***********************
                                              *  T E C H N I C A L  *
                                              ***********************
  


 =============================================================
 P A R A L L E L I Z A T I O N  and  V E C T O R I Z A T I O N
 =============================================================
  
 Nr of parallel processes:                                1
 Maximum vector length in NumInt loops:                 128

 IO buffersize (Mb):                                     64.000000


 =====================
 S C F   U P D A T E S
 =====================
  
 Max. nr. of cycles:                               300
 Convergence criterion:                              0.0000000100
   secondary criterion:                              0.0000000100

 Mix parameter (when DIIS does not apply):           0.2000000000
 Special mix parameter for the first cycle:          1.0000000000
 Mixed ADIIS+DIIS will be used
    Max number of expansion vectors:                10
    Pure ADIIS when Max([F,P]) is above              0.1000000000
    Pure DIIS when Max([F,P]) is below               0.0010000000
 Automatic ElectronSmearing (in case of problematic SCF convergence) disabled


 =================
 P R E C I S I O N  ***  (General: NumInt, NeglectFunctionTails, ...)  ***
 =================
  

 NumInt:           Target precision:                12.0000000000
 -------           Initial precision:               10.0000000000
                   Min. precision (optimization):   10.0000000000

 Neglect Functions:          Basis functions:        0.1000000000E-13
 ------------------          Fit functions:          0.1000000000E-13


 ===========================
 L I N E A R   S C A L I N G
 ===========================
  

 Cut-off radii density fit:                        0.1000000000E-97
 Overlap cut-off criterion AO matrix elements:     0.1000000000E-97
 Cut-offs for Coulomb potential and fitted density:0.1000000000E-97
 Cut-off criterion for Coulomb multipole terms:    0.1000000000E-97
 Progressive Convergence parameter:                 0.000000000    
1
 ***************************************************************************************************


                                            ***************************
                                            *  C O M P U T A T I O N  *
                                            ***************************
  

 Number of elements of the density matrix on this node (used, total):       465       465


 ===========================================
 Numerical Integration : Fuzzy Cells (Becke)
 ===========================================
  
 Becke grid quality: VERYGOOD       
  
 Lebedev angular grid order:             min:  13 max:  41
 Nr. of radial points:                   min:  68 max:  68

 Total nr. of points:         68
 Nr. of blocks:                1
 Block length:                68
 Nr. of dummy points:          0


 Test of Precision of the Numerical Integration Grid
 ===================================================

 Integral of the Total Core Density:                   0.00000000000000


 ========================
 Density Fitting (zlmFit)
 ========================
  
 ZlmFit Fit Quality: VERYGOOD       
  
 Max L-expansion:                        min:   0 max:   0
 Nr. of radial interpolation points:     min: 180 max: 180


 =====
 S C F  ***  ScaSCF  ***
 =====
  

 CYCLE    1
 SCF Error: norm([F,P])=      0.000000000000, max([F,P])=      0.000000000000
 orbitals (Q,E):
 ---------------
 S :1...5            ( 2.00   -32.0157)  ( 2.00    -7.9419)  ( 0.00    -3.4652)  ( 0.00     4.2896)
                     ( 0.00   109.0744)
 P :1...3            ( 4.00    -8.0011)  ( 0.00    -3.4871)  ( 0.00    -1.8916)
 D :1...1            ( 0.00    -3.3333)
 F :1...1            ( 0.00    -1.5001)

 CYCLE    2
  SDIIS (wt  0.000):  1.0000  0.0000
 A-DIIS (wt  1.000):  0.0000  1.0000
  DIIS coefficients:  0.0000  1.0000
 SCF Error: norm([F,P])=      8.793317839064, max([F,P])=      5.532923201920
 orbitals (Q,E):
 ---------------
 S :1...3            ( 2.00   -14.5314)  ( 2.00     0.0217)  ( 0.00     1.8292)
 P :1...2            ( 4.00     0.2457)  ( 0.00     1.2348)
 D :1...1            ( 0.00     1.5788)
 F :1...1            ( 0.00     3.9810)

 CYCLE    3
  SDIIS (wt  0.000):  0.2252  0.7748
 A-DIIS (wt  1.000):  0.3116  0.6884
  DIIS coefficients:  0.3116  0.6884
 SCF Error: norm([F,P])=      3.552092106639, max([F,P])=      2.506991696998
 orbitals (Q,E):
 ---------------
 S :1...3            ( 2.00   -19.8037)  ( 2.00    -1.5267)  ( 0.00     0.4003)
 P :1...2            ( 4.00    -0.9798)  ( 0.00     0.1275)
 D :1...1            ( 0.00     0.6570)
 F :1...1            ( 0.00     2.8663)

 CYCLE    4
  SDIIS (wt  0.000): -0.0485  0.1722  0.8763
 A-DIIS (wt  1.000):  0.0000  0.0000  1.0000
  DIIS coefficients:  0.0000  0.0000  1.0000
 SCF Error: norm([F,P])=      1.186400285312, max([F,P])=      0.598203866081
 orbitals (Q,E):
 ---------------
 S :1...3            ( 2.00   -18.0177)  ( 2.00    -0.5481)  ( 0.00     1.0428)
 P :1...2            ( 4.00    -0.0407)  ( 0.00     0.5430)
 D :1...1            ( 0.00     1.2478)
 F :1...1            ( 0.00     3.5719)

 CYCLE    5
  SDIIS (wt  0.000): -0.0198 -0.0845  0.5648  0.5395
 A-DIIS (wt  1.000):  0.0000  0.0000  0.6214  0.3786
  DIIS coefficients:  0.0000  0.0000  0.6214  0.3786
 SCF Error: norm([F,P])=      1.467725689533, max([F,P])=      0.818577363888
 orbitals (Q,E):
 ---------------
 S :1...3            ( 2.00   -18.8197)  ( 2.00    -0.8638)  ( 0.00     0.8067)
 P :1...2            ( 4.00    -0.3145)  ( 0.00     0.3640)
 D :1...1            ( 0.00     1.0692)
 F :1...1            ( 0.00     3.3561)

 CYCLE    6
  SDIIS (wt  0.149):  0.0037 -0.0019  0.0499 -0.0369  0.9853
 A-DIIS (wt  0.851):  0.0000  0.0000  0.0000  0.0000  1.0000
  DIIS coefficients:  0.0005 -0.0003  0.0074 -0.0055  0.9978
 SCF Error: norm([F,P])=      0.142992517789, max([F,P])=      0.085258187544
 orbitals (Q,E):
 ---------------
 S :1...3            ( 2.00   -18.9955)  ( 2.00    -0.9126)  ( 0.00     0.7748)
 P :1...2            ( 4.00    -0.3625)  ( 0.00     0.3405)
 D :1...1            ( 0.00     1.0512)
 F :1...1            ( 0.00     3.3328)

 CYCLE    7
  SDIIS (wt  0.300): -0.0003  0.0000 -0.0125  0.0179  0.3033  0.6916
 A-DIIS (wt  0.700):  0.0000  0.0000  0.0000  0.0000  0.4767  0.5233
  DIIS coefficients: -0.0001  0.0000 -0.0037  0.0054  0.4248  0.5737
 SCF Error: norm([F,P])=      0.122685051133, max([F,P])=      0.070349314819
 orbitals (Q,E):
 ---------------
 S :1...3            ( 2.00   -18.9129)  ( 2.00    -0.8805)  ( 0.00     0.7958)
 P :1...2            ( 4.00    -0.3314)  ( 0.00     0.3535)
 D :1...1            ( 0.00     1.0678)
 F :1...1            ( 0.00     3.3529)

 CYCLE    8
  SDIIS (wt  0.999): -0.0000  0.0002  0.0031 -0.0028 -0.0102 -0.0489  1.0586
 A-DIIS (wt  0.001):  0.0000  0.0000  0.0000  0.0000  0.0000  0.0000  1.0000
  DIIS coefficients: -0.0000  0.0002  0.0031 -0.0028 -0.0102 -0.0489  1.0586
 SCF Error: norm([F,P])=      0.002323244437, max([F,P])=      0.001053744043
 orbitals (Q,E):
 ---------------
 S :1...3            ( 2.00   -18.9136)  ( 2.00    -0.8815)  ( 0.00     0.7952)
 P :1...2            ( 4.00    -0.3323)  ( 0.00     0.3530)
 D :1...1            ( 0.00     1.0672)
 F :1...1            ( 0.00     3.3522)

 CYCLE    9
  SDIIS (wt  1.000): -0.0000  0.0000  0.0001 -0.0000 -0.0002 -0.0012  0.0321  0.9692
  DIIS coefficients: -0.0000  0.0000  0.0001 -0.0000 -0.0002 -0.0012  0.0321  0.9692
 SCF Error: norm([F,P])=      0.000124650039, max([F,P])=      0.000065124834
 orbitals (Q,E):
 ---------------
 S :1...3            ( 2.00   -18.9135)  ( 2.00    -0.8814)  ( 0.00     0.7952)
 P :1...2            ( 4.00    -0.3323)  ( 0.00     0.3530)
 D :1...1            ( 0.00     1.0672)
 F :1...1            ( 0.00     3.3522)

 CYCLE   10
  SDIIS (wt  1.000):  0.0000  0.0000 -0.0000 -0.0000 -0.0000 -0.0013 -0.0142  1.0155
  DIIS coefficients:  0.0000  0.0000 -0.0000 -0.0000 -0.0000 -0.0013 -0.0142  1.0155
 SCF Error: norm([F,P])=      0.000001661073, max([F,P])=      0.000000867615
 orbitals (Q,E):
 ---------------
 S :1...3            ( 2.00   -18.9135)  ( 2.00    -0.8815)  ( 0.00     0.7952)
 P :1...2            ( 4.00    -0.3323)  ( 0.00     0.3530)
 D :1...1            ( 0.00     1.0672)
 F :1...1            ( 0.00     3.3522)

 CYCLE   11
  SDIIS (wt  1.000):  0.0000  0.0006 -0.0229  1.0224
  DIIS coefficients:  0.0000  0.0006 -0.0229  1.0224
 SCF Error: norm([F,P])=      0.000000038671, max([F,P])=      0.000000020401
 orbitals (Q,E):
 ---------------
 S :1...3            ( 2.00   -18.9135)  ( 2.00    -0.8815)  ( 0.00     0.7952)
 P :1...2            ( 4.00    -0.3323)  ( 0.00     0.3530)
 D :1...1            ( 0.00     1.0672)
 F :1...1            ( 0.00     3.3522)

 CYCLE   12
  SDIIS (wt  1.000):  0.0000 -0.0002  0.0092  0.9909
  DIIS coefficients:  0.0000 -0.0002  0.0092  0.9909
 SCF Error: norm([F,P])=      0.000000000195, max([F,P])=      0.000000000117
 orbitals (Q,E):
 ---------------
 S :1...3            ( 2.00   -18.9135)  ( 2.00    -0.8815)  ( 0.00     0.7952)
 P :1...2            ( 4.00    -0.3323)  ( 0.00     0.3530)
 D :1...1            ( 0.00     1.0672)
 F :1...1            ( 0.00     3.3522)

 SCF CONVERGED

 CYCLE   13
1
 ***************************************************************************************************


                                                *******************
                                                *  R E S U L T S  *
                                                *******************
  
  
 Hartree-Fock exchange energy:   -7.61452215177508     
 *** Setting up for NEW gradients in Focky
 *** Using FIT density in Focky

 Scaled ZORA Orbital Energies, per Irrep and Spin:
 =================================================
                        Occup              E (au)              E (eV)       Diff (eV) with prev. cycle
                        -----      --------------------        ------       --------------------------
 S
               1        2.000     -0.18913533563385E+02      -514.663               2.55E-10
               2        2.000     -0.88145005995943E+00       -23.985               1.63E-10
               3        0.000      0.79518653321370E+00        21.638
               4        0.000      0.13451744054018E+02       366.041
               5        0.000      0.12163768645269E+03      3309.930
 P
               1        4.000     -0.33230950183292E+00        -9.043               1.56E-10
               2        0.000      0.35303509398587E+00         9.607
               3        0.000      0.38372579488414E+01       104.417
 D
               1        0.000      0.10671903238138E+01        29.040
 F
               1        0.000      0.33522196652462E+01        91.219


 Partially Occupied:
               1 P                -0.33230950183292E+00
  
 HOMO :        2 S                -0.88145005995943E+00
 LUMO :        2 P                 0.35303509398587E+00
  


 Orbital Energies, all Irreps
 ========================================

 Irrep        no.  (spin)   Occup              E (au)                E (eV)
 ---------------------------------------------------------------------------
 S             1             2.00       -0.18913533563385E+02      -514.6634
 S             2             2.00       -0.88145005995943E+00       -23.9855
 P             1             4.00       -0.33230950183292E+00        -9.0426
 P             2             0.00        0.35303509398587E+00         9.6066
 S             3             0.00        0.79518653321370E+00        21.6381
 D             1             0.00        0.10671903238138E+01        29.0397
 F             1             0.00        0.33522196652462E+01        91.2185
 P             3             0.00        0.38372579488414E+01       104.4171
 S             4             0.00        0.13451744054018E+02       366.0406
 S             5             0.00        0.12163768645269E+03      3309.9299


 All Electron Calculation, thus no Orbital Energies of the Core Orbitals are calculated


 =======================================
 M U L L I K E N   P O P U L A T I O N S
 =======================================
  
 The survey below gives for each atom:
 a) the total charge (Z minus electrons)
 b) the net spin polarization (nr of electrons spin-A minus spin-B)
 c) for each spin the atomic electron valence density (integrated) per L-value.

 Atom              Charge    Spin density          S         P         D         F
 ----              ------    ------------       ------    ------    ------    ------
 1 O               0.0000                       4.0000    4.0000    0.0000    0.0000

 Populations of individual BAS functions
 ----------------------------------------
 1 O            0.6830  1.2735  0.0088  1.1505  0.8842  0.2473  0.2473  0.2473  0.7502  0.7502
                0.7502  0.3359  0.3359  0.3359  0.0000  0.0000  0.0000  0.0000  0.0000  0.0000
                0.0000  0.0000  0.0000  0.0000  0.0000  0.0000  0.0000  0.0000  0.0000  0.0000

 Gross Charges per Atom (Z minus electrons)
 ==========================================
             0.0000
 Net Total:  0.00000000


 =======================================================================
 Electrostatic potential at the Nuclei due to electrons and other nuclei
 =======================================================================
  
         Atom                  Potential
         ----                  ---------
     1)   O                  22.26074866
 
 
 ========================
 No memory problems found
 ========================
 
 Maximum number of active allocate calls:         480
 
 *******************************************************************************

                             A D F   E X I T
 NORMAL TERMINATION


 =================
 Timing Statistics
 =================
  
 Total Used :                     CPU=        0.35      System=        0.01     Elapsed=        0.41

 Calls  Section                     ( Mean, Percentage )
 ---------------------------------------------------------------------------------------------------
     3  ><      ................      0.00    0.23             0.00    0.04             0.00    0.74
     1  INIT    ................      0.01    3.10             0.00   64.56             0.03    6.12
     1  GEOMET  ................      0.01    1.82             0.00   12.74             0.01    3.13
     1  INPUTA  ................      0.00    0.47             0.00    0.43             0.00    0.53
     1  MAINSY  ................      0.01    1.59             0.00    9.54             0.01    2.72
     1  SYMFIT  ................      0.00    0.24             0.00    0.00             0.00    0.20
     1  CORORT  ................      0.00    0.10             0.00    0.00             0.00    0.42
     1  SYMORB  ................      0.00    0.23             0.00    0.00             0.00    0.20
     1  FITINT  ................      0.01    2.35             0.00    0.00             0.01    2.28
     1  CLSMAT  ................      0.00    0.10             0.00    0.00             0.00    0.41
     1  ORTHON  ................      0.00    0.43             0.00    0.00             0.00    0.62
     1  GENPT   ................      0.01    2.88             0.00    0.00             0.01    3.07
     1  PTBAS   ................      0.00    0.93             0.00    0.00             0.00    1.10
    13  FOCKY   ................      0.02   70.20             0.00    0.00             0.02   59.64
    13  FOCKTR  ................      0.00    2.20             0.00    0.00             0.00    1.85
    13  SDIIS   ................      0.00    4.40             0.00    0.00             0.00    8.32
     1  COREPS  ................      0.01    4.03             0.00    0.00             0.01    3.39
     1  POPAN   ................      0.00    1.06             0.00    0.00             0.00    1.20
     1  DEBYE   ................      0.00    0.13             0.00    0.00             0.00    0.37
     1  EXIT PROCEDURE .........      0.01    3.50             0.00   12.70             0.02    3.69


 Currently Open Files (EXIT00)
 ====================

 Unit    Access Format  Status   Type       Ident (file)
 -------------------------------------------------------
   3      SEQ    FORM   TRANSP  NORMAL      LOGFILE
                                          ( logfile )


 Buffered I/O statistics
 =======================
 Memory available:                     67108864
 Number of records fitting in memory:     16131
 Input :   0.1% of                        32858  *4k bytes
 Output:  15.2% of                         1529  *4k bytes
 Records from serial files evicted:           0
                    others evicted:           0
 Hash table lookups:      85299 with          0 conflicts (  0.00%)

 ***************************************************************************************************
 (LOGFILE)
 <Dec09-2020> <01:39:24>  DIRAC 2017  RunTime: Dec09-2020 01:39:24  Nodes: 1  Procs: 1
 <Dec09-2020> <01:39:24>  NORMAL TERMINATION
 <Dec09-2020> <01:39:24>  END
 <Dec09-2020> <01:39:24>  ADF 2017  RunTime: Dec09-2020 01:39:24  Nodes: 1  Procs: 1
 <Dec09-2020> <01:39:24>  Hydrogen (TZ2P)
 <Dec09-2020> <01:39:24>  RunType   : CREATE
 <Dec09-2020> <01:39:24>  Net Charge: 0 (Nuclei minus Electrons)
 <Dec09-2020> <01:39:24>  Symmetry  : ATOM
  Coordinates
    Atom         X           Y           Z   (Angstrom)
    1.H         0.000000    0.000000    0.000000
 <Dec09-2020> <01:39:24>  >>>> CORORT
 <Dec09-2020> <01:39:24>  >>>> FITINT
 <Dec09-2020> <01:39:24>  >>>> CLSMAT
 <Dec09-2020> <01:39:24>  >>>> ORTHON
 <Dec09-2020> <01:39:24>  >>>> GENPT
 <Dec09-2020> <01:39:24>  Block Length=  64
 <Dec09-2020> <01:39:24>  >>>> PTBAS
 <Dec09-2020> <01:39:24>  >>>> CYCLE
 <Dec09-2020> <01:39:24>              |Error|         MaxErr       Wt(A-DIIS)
 <Dec09-2020> <01:39:24>      1      0.00000000      0.00000000
 <Dec09-2020> <01:39:24>      2      0.03155047      0.03012130
 <Dec09-2020> <01:39:24>      3      0.00862036      0.00834572    100.0
 <Dec09-2020> <01:39:24>      4      0.00173320      0.00171953      0.7
 <Dec09-2020> <01:39:24>      5      0.00004372      0.00003982      0.0
 <Dec09-2020> <01:39:24>      6      0.00000239      0.00000216      0.0
 <Dec09-2020> <01:39:24>      7      0.00000001      0.00000001      0.0
 <Dec09-2020> <01:39:24>  SCF converged
 <Dec09-2020> <01:39:24>      8      0.00000000      0.00000000      0.0
 <Dec09-2020> <01:39:24>  >>>> POPAN
 <Dec09-2020> <01:39:24>  >>>> DEBYE
 <Dec09-2020> <01:39:24>  NORMAL TERMINATION
 <Dec09-2020> <01:39:24>  END
 <Dec09-2020> <01:39:24>  DIRAC 2017  RunTime: Dec09-2020 01:39:24  Nodes: 1  Procs: 1
 <Dec09-2020> <01:39:24>  NORMAL TERMINATION
 <Dec09-2020> <01:39:24>  END
 <Dec09-2020> <01:39:25>  ADF 2017  RunTime: Dec09-2020 01:39:25  Nodes: 1  Procs: 1
 <Dec09-2020> <01:39:25>  Nitrogen (TZ2P)
 <Dec09-2020> <01:39:25>  RunType   : CREATE
 <Dec09-2020> <01:39:25>  Net Charge: 0 (Nuclei minus Electrons)
 <Dec09-2020> <01:39:25>  Symmetry  : ATOM
  Coordinates
    Atom         X           Y           Z   (Angstrom)
    1.N         0.000000    0.000000    0.000000
 <Dec09-2020> <01:39:25>  >>>> CORORT
 <Dec09-2020> <01:39:25>  >>>> FITINT
 <Dec09-2020> <01:39:25>  >>>> CLSMAT
 <Dec09-2020> <01:39:25>  >>>> ORTHON
 <Dec09-2020> <01:39:25>  >>>> GENPT
 <Dec09-2020> <01:39:25>  Block Length=  72
 <Dec09-2020> <01:39:25>  >>>> PTBAS
 <Dec09-2020> <01:39:25>  >>>> CYCLE
 <Dec09-2020> <01:39:25>              |Error|         MaxErr       Wt(A-DIIS)
 <Dec09-2020> <01:39:25>      1      0.00000000      0.00000000
 <Dec09-2020> <01:39:25>      2      6.47720093      4.24006811    100.0
 <Dec09-2020> <01:39:25>      3      2.46800817      1.94812547    100.0
 <Dec09-2020> <01:39:25>      4      1.00979984      0.66218778    100.0
 <Dec09-2020> <01:39:25>      5      0.78846124      0.54226444    100.0
 <Dec09-2020> <01:39:25>      6      0.08887211      0.05234604     51.9
 <Dec09-2020> <01:39:25>      7      0.05595493      0.03712600     36.5
 <Dec09-2020> <01:39:25>      8      0.00836694      0.00569520      4.7
 <Dec09-2020> <01:39:25>      9      0.00034439      0.00023023      0.0
 <Dec09-2020> <01:39:25>     10      0.00000401      0.00000238      0.0
 <Dec09-2020> <01:39:25>     11      0.00000004      0.00000002      0.0
 <Dec09-2020> <01:39:25>     12      0.00000000      0.00000000      0.0
 <Dec09-2020> <01:39:25>  SCF converged
 <Dec09-2020> <01:39:25>     13      0.00000000      0.00000000      0.0
 <Dec09-2020> <01:39:25>  >>>> POPAN
 <Dec09-2020> <01:39:25>  >>>> DEBYE
 <Dec09-2020> <01:39:25>  NORMAL TERMINATION
 <Dec09-2020> <01:39:25>  END
 <Dec09-2020> <01:39:25>  DIRAC 2017  RunTime: Dec09-2020 01:39:25  Nodes: 1  Procs: 1
 <Dec09-2020> <01:39:25>  NORMAL TERMINATION
 <Dec09-2020> <01:39:25>  END
 <Dec09-2020> <01:39:25>  ADF 2017  RunTime: Dec09-2020 01:39:25  Nodes: 1  Procs: 1
 <Dec09-2020> <01:39:25>  Sulphur (TZ2P)
 <Dec09-2020> <01:39:25>  RunType   : CREATE
 <Dec09-2020> <01:39:25>  Net Charge: 0 (Nuclei minus Electrons)
 <Dec09-2020> <01:39:25>  Symmetry  : ATOM
  Coordinates
    Atom         X           Y           Z   (Angstrom)
    1.S         0.000000    0.000000    0.000000
 <Dec09-2020> <01:39:25>  >>>> CORORT
 <Dec09-2020> <01:39:25>  >>>> FITINT
 <Dec09-2020> <01:39:25>  >>>> CLSMAT
 <Dec09-2020> <01:39:25>  >>>> ORTHON
 <Dec09-2020> <01:39:25>  >>>> GENPT
 <Dec09-2020> <01:39:25>  Block Length=  85
 <Dec09-2020> <01:39:25>  >>>> PTBAS
 <Dec09-2020> <01:39:25>  >>>> CYCLE
 <Dec09-2020> <01:39:25>              |Error|         MaxErr       Wt(A-DIIS)
 <Dec09-2020> <01:39:25>      1      0.00000000      0.00000000
 <Dec09-2020> <01:39:25>      2     30.56235076      9.99058795    100.0
 <Dec09-2020> <01:39:25>      3     19.19766278      5.09991672    100.0
 <Dec09-2020> <01:39:25>      4      5.70528361      1.91207544    100.0
 <Dec09-2020> <01:39:26>      5      4.44406738      1.94911571    100.0
 <Dec09-2020> <01:39:26>      6      0.78987575      0.33860374    100.0
 <Dec09-2020> <01:39:26>      7      0.72947378      0.33639287    100.0
 <Dec09-2020> <01:39:26>      8      0.05329152      0.02355028     22.8
 <Dec09-2020> <01:39:26>      9      0.01266669      0.00574634      4.8
 <Dec09-2020> <01:39:26>     10      0.00076690      0.00036163      0.0
 <Dec09-2020> <01:39:26>     11      0.00001783      0.00000564      0.0
 <Dec09-2020> <01:39:26>     12      0.00000274      0.00000114      0.0
 <Dec09-2020> <01:39:26>     13      0.00000005      0.00000002      0.0
 <Dec09-2020> <01:39:26>     14      0.00000000      0.00000000      0.0
 <Dec09-2020> <01:39:26>  SCF converged
 <Dec09-2020> <01:39:26>     15      0.00000000      0.00000000      0.0
 <Dec09-2020> <01:39:26>  >>>> POPAN
 <Dec09-2020> <01:39:26>  >>>> DEBYE
 <Dec09-2020> <01:39:26>  NORMAL TERMINATION
 <Dec09-2020> <01:39:26>  END
 <Dec09-2020> <01:39:26>  DIRAC 2017  RunTime: Dec09-2020 01:39:26  Nodes: 1  Procs: 1
 <Dec09-2020> <01:39:26>  NORMAL TERMINATION
 <Dec09-2020> <01:39:26>  END
 <Dec09-2020> <01:39:26>  ADF 2017  RunTime: Dec09-2020 01:39:26  Nodes: 1  Procs: 1
 <Dec09-2020> <01:39:26>  Carbon (TZ2P)
 <Dec09-2020> <01:39:26>  RunType   : CREATE
 <Dec09-2020> <01:39:26>  Net Charge: 0 (Nuclei minus Electrons)
 <Dec09-2020> <01:39:26>  Symmetry  : ATOM
  Coordinates
    Atom         X           Y           Z   (Angstrom)
    1.C         0.000000    0.000000    0.000000
 <Dec09-2020> <01:39:26>  >>>> CORORT
 <Dec09-2020> <01:39:26>  >>>> FITINT
 <Dec09-2020> <01:39:26>  >>>> CLSMAT
 <Dec09-2020> <01:39:26>  >>>> ORTHON
 <Dec09-2020> <01:39:26>  >>>> GENPT
 <Dec09-2020> <01:39:26>  Block Length=  72
 <Dec09-2020> <01:39:26>  >>>> PTBAS
 <Dec09-2020> <01:39:26>  >>>> CYCLE
 <Dec09-2020> <01:39:26>              |Error|         MaxErr       Wt(A-DIIS)
 <Dec09-2020> <01:39:26>      1      0.00000000      0.00000000
 <Dec09-2020> <01:39:26>      2      4.50424801      3.33672525    100.0
 <Dec09-2020> <01:39:26>      3      1.59864130      1.29986518    100.0
 <Dec09-2020> <01:39:26>      4      0.75718585      0.61152167    100.0
 <Dec09-2020> <01:39:26>      5      0.37725815      0.30483402    100.0
 <Dec09-2020> <01:39:26>      6      0.15594468      0.12241741    100.0
 <Dec09-2020> <01:39:26>      7      0.10541666      0.08341186     83.2
 <Dec09-2020> <01:39:26>      8      0.02142338      0.01686857     16.0
 <Dec09-2020> <01:39:26>      9      0.00289458      0.00229266      1.3
 <Dec09-2020> <01:39:26>     10      0.00003478      0.00002764      0.0
 <Dec09-2020> <01:39:26>     11      0.00000009      0.00000007      0.0
 <Dec09-2020> <01:39:26>     12      0.00000000      0.00000000      0.0
 <Dec09-2020> <01:39:26>  SCF converged
 <Dec09-2020> <01:39:26>     13      0.00000000      0.00000000      0.0
 <Dec09-2020> <01:39:26>  >>>> POPAN
 <Dec09-2020> <01:39:26>  >>>> DEBYE
 <Dec09-2020> <01:39:26>  NORMAL TERMINATION
 <Dec09-2020> <01:39:26>  END
 <Dec09-2020> <01:39:26>  DIRAC 2017  RunTime: Dec09-2020 01:39:26  Nodes: 1  Procs: 1
 <Dec09-2020> <01:39:27>  NORMAL TERMINATION
 <Dec09-2020> <01:39:27>  END
 <Dec09-2020> <01:39:27>  ADF 2017  RunTime: Dec09-2020 01:39:27  Nodes: 1  Procs: 1
 <Dec09-2020> <01:39:27>  Oxygen (TZ2P)
 <Dec09-2020> <01:39:27>  RunType   : CREATE
 <Dec09-2020> <01:39:27>  Net Charge: 0 (Nuclei minus Electrons)
 <Dec09-2020> <01:39:27>  Symmetry  : ATOM
  Coordinates
    Atom         X           Y           Z   (Angstrom)
    1.O         0.000000    0.000000    0.000000
 <Dec09-2020> <01:39:27>  >>>> CORORT
 <Dec09-2020> <01:39:27>  >>>> FITINT
 <Dec09-2020> <01:39:27>  >>>> CLSMAT
 <Dec09-2020> <01:39:27>  >>>> ORTHON
 <Dec09-2020> <01:39:27>  >>>> GENPT
 <Dec09-2020> <01:39:27>  Block Length=  68
 <Dec09-2020> <01:39:27>  >>>> PTBAS
 <Dec09-2020> <01:39:27>  >>>> CYCLE
 <Dec09-2020> <01:39:27>              |Error|         MaxErr       Wt(A-DIIS)
 <Dec09-2020> <01:39:27>      1      0.00000000      0.00000000
 <Dec09-2020> <01:39:27>      2      8.79331784      5.53292320    100.0
 <Dec09-2020> <01:39:27>      3      3.55209211      2.50699170    100.0
 <Dec09-2020> <01:39:27>      4      1.18640029      0.59820387    100.0
 <Dec09-2020> <01:39:27>      5      1.46772569      0.81857736    100.0
 <Dec09-2020> <01:39:27>      6      0.14299252      0.08525819     85.1
 <Dec09-2020> <01:39:27>      7      0.12268505      0.07034931     70.0
 <Dec09-2020> <01:39:27>      8      0.00232324      0.00105374      0.1
 <Dec09-2020> <01:39:27>      9      0.00012465      0.00006512      0.0
 <Dec09-2020> <01:39:27>     10      0.00000166      0.00000087      0.0
 <Dec09-2020> <01:39:27>     11      0.00000004      0.00000002      0.0
 <Dec09-2020> <01:39:27>     12      0.00000000      0.00000000      0.0
 <Dec09-2020> <01:39:27>  SCF converged
 <Dec09-2020> <01:39:27>     13      0.00000000      0.00000000      0.0
 <Dec09-2020> <01:39:27>  >>>> POPAN
 <Dec09-2020> <01:39:27>  >>>> DEBYE
 <Dec09-2020> <01:39:27>  NORMAL TERMINATION
 <Dec09-2020> <01:39:27>  END
NORMAL TERMINATION


 Parallel Execution: Process Information
 ==============================================================================
 Rank   Node Name                              NodeID   MyNodeRank  NodeMaster
    0   r14n32.lisa.surfsara.nl                   0          0          0
    1   r14n32.lisa.surfsara.nl                   0          1         -1
    2   r14n32.lisa.surfsara.nl                   0          2         -1
    3   r14n32.lisa.surfsara.nl                   0          3         -1
    4   r14n32.lisa.surfsara.nl                   0          4         -1
    5   r14n32.lisa.surfsara.nl                   0          5         -1
    6   r14n32.lisa.surfsara.nl                   0          6         -1
    7   r14n32.lisa.surfsara.nl                   0          7         -1
    8   r15n18.lisa.surfsara.nl                   1          0          1
    9   r15n18.lisa.surfsara.nl                   1          1         -1
   10   r15n18.lisa.surfsara.nl                   1          2         -1
   11   r15n18.lisa.surfsara.nl                   1          3         -1
   12   r15n18.lisa.surfsara.nl                   1          4         -1
   13   r15n18.lisa.surfsara.nl                   1          5         -1
   14   r15n18.lisa.surfsara.nl                   1          6         -1
   15   r15n18.lisa.surfsara.nl                   1          7         -1
 ==============================================================================


May use up to 45443MB of RAM as shared memory on node 0
May use up to 45443MB of RAM as shared memory on node 1


ATOMS
      1 H          -2.6561    0.1436   -0.8941
      2 H           1.4487   -2.4239   -0.3567
      3 N           1.1164   -1.4563   -0.2142
      4 N           1.5700    0.9346    0.1386
      5 O          -1.0125   -2.1232   -0.3136
      6 H           2.2278    1.7211    0.2549
      7 C          -0.2182   -1.2043   -0.1777
      8 C          -0.7148    0.1850    0.0269
      9 C           0.1711    1.1900    0.17516
     10 C           2.0495   -0.3917   -0.0568
     11 C          -2.1960    0.4569    0.0663
     12 H          -0.1751    2.2087    0.3256
     13 H          -2.6570   -0.1203    0.8950
     14 H          -2.4185    1.5340    0.2250
     15 S           3.4646   -0.6541   -0.0948
END

NUMERICALQUALITY Good

SYMMETRY NOSYM

Unrestricted

CHARGE {0 {0}}

noncollinear

HartreeFock

NoPrint LogFile

XC
  GGA PBE
END

RELATIVISTIC Scalar ZORA

GEOMETRY
END

EXCITATIONS
ONLYSING
lowest 4
END

EXCITEDGO
    state A 1
    Singlet
END

SCF
  converge 1.0e-8 1.0e-6
  diis ok=0.01
  iterations 10000
END

Fragments
H t21.H
N t21.N
S t21.S
C t21.C
O t21.O
End
end input

 *******************************************************************************
 *                                                                             *
 *  -------------------------------------                                      *
 *   Amsterdam Density Functional  (ADF)         2017                          *
 *  -------------------------------------                                      *
 *                                               r58813 2017-04-12             *
 *                                                                             *
 *                                                                             *
 *                              =================                              *
 *                              |               |                              *
 *                              |     A D F     |                              *
 *                              |               |                              *
 *                              =================                              *
 *                                                                             *
 *                                                                             *
 *   Online information and documentation:  https://www.scm.com/support/       *
 *   E-mail:  support@scm.com   info@scm.com                                   *
 *                                                                             *
 *   Scientific publications using ADF results must be properly referenced     *
 *   See the User Manuals (or the web site) for recommended citations          *
 *   The terms and conditions of the End User License Agreement apply to       *
 *   the use of ADF, https://www.scm.com/license-terms/                        *
 *                                                                             *
 **********************  x86_64_linux_intel / intelmpi  ************************
 
 Licensed to: SURF-SARA, Comp. & Networking Services / Amsterdam / NL
 SCM User ID: u7409
  
 ADF 2017  RunTime: Dec09-2020 01:39:29  Nodes: 2  Procs: 16

 Temporary files are created in /scratch/kid_0.yD9sa5


Communication costs MPI_COMM_WORLD:  21728.226 usec per message,  20.2424 usec per 8-byte item
Communication costs for intra-node:  20137.348 usec per message,  15.6885 usec per 8-byte item

 *** (NO TITLE) ***


 ===========================
 A T T A C H E D   F I L E S
 ===========================
  


 ===============================
 M O D E L   P A R A M E T E R S
 ===============================
  
 DENSITY FUNCTIONAL POTENTIAL (scf)
    LDA:                               PW92                                    == Not Default ==
    Gradient Corrections:              PBEc PBEx                               == Not Default ==

 SPIN  (restricted / unrestr.)
    Molecule:                          UNrestricted                            == Not Default ==
    Fragments:                         Restricted                               

 OTHER ASPECTS
    Relativistic Corrections:          scalar (ZORA,MAPA)                      == Not Default ==

    Nuclear Charge Density Model:      Point Charge Nuclei                      
    Core Treatment:                    Frozen Orbital(s)                        

    Hyperfine or Zeeman Interaction:   ---                                      


 Fragment File(s)
 ----------------
 H:
         file : t21.H
         jobid: ADF 2017  RunTime: Dec09-2020 01:39:24  Nodes: 1  Procs: 1
         title: Hydrogen (TZ2P)
 N:
         file : t21.N
         jobid: ADF 2017  RunTime: Dec09-2020 01:39:25  Nodes: 1  Procs: 1
         title: Nitrogen (TZ2P)
 O:
         file : t21.O
         jobid: ADF 2017  RunTime: Dec09-2020 01:39:27  Nodes: 1  Procs: 1
         title: Oxygen (TZ2P)
 C:
         file : t21.C
         jobid: ADF 2017  RunTime: Dec09-2020 01:39:26  Nodes: 1  Procs: 1
         title: Carbon (TZ2P)
 S:
         file : t21.S
         jobid: ADF 2017  RunTime: Dec09-2020 01:39:25  Nodes: 1  Procs: 1
         title: Sulphur (TZ2P)


                                   *********************************************
                                   *  R U N   T Y P E : GEOMETRY OPTIMIZATION  *
                                   *********************************************
  


 ===============
 G E O M E T R Y  ***  3D  Molecule  ***
 ===============
  

 ATOMS
 =====                            X Y Z                    CHARGE
                                (Angstrom)             Nucl     +Core       At.Mass
                       --------------------------    ----------------       -------
    1  H              -2.6561    0.1436   -0.8941      1.00      1.00        1.0078
    2  H               1.4487   -2.4239   -0.3567      1.00      1.00        1.0078
    3  N               1.1164   -1.4563   -0.2142      7.00      7.00       14.0031
    4  N               1.5700    0.9346    0.1386      7.00      7.00       14.0031
    5  O              -1.0125   -2.1232   -0.3136      8.00      8.00       15.9949
    6  H               2.2278    1.7211    0.2549      1.00      1.00        1.0078
    7  C              -0.2182   -1.2043   -0.1777      6.00      6.00       12.0000
    8  C              -0.7148    0.1850    0.0269      6.00      6.00       12.0000
    9  C               0.1711    1.1900    0.1752      6.00      6.00       12.0000
   10  C               2.0495   -0.3917   -0.0568      6.00      6.00       12.0000
   11  C              -2.1960    0.4569    0.0663      6.00      6.00       12.0000
   12  H              -0.1751    2.2087    0.3256      1.00      1.00        1.0078
   13  H              -2.6570   -0.1203    0.8950      1.00      1.00        1.0078
   14  H              -2.4185    1.5340    0.2250      1.00      1.00        1.0078
   15  S               3.4646   -0.6541   -0.0948     16.00     16.00       31.9721


 FRAGMENTS
 =========                                     Atoms in this Fragment     Cart. coord.s (Angstrom)
                                               -------------------------------------------------------
    1  H                                                 1  H           -2.6561    0.1436   -0.8941
    2  H                                                 2  H            1.4487   -2.4239   -0.3567
    3  H                                                 6  H            2.2278    1.7211    0.2549
    4  H                                                12  H           -0.1751    2.2087    0.3256
    5  H                                                13  H           -2.6570   -0.1203    0.8950
    6  H                                                14  H           -2.4185    1.5340    0.2250
    7  N                                                 3  N            1.1164   -1.4563   -0.2142
    8  N                                                 4  N            1.5700    0.9346    0.1386
    9  O                                                 5  O           -1.0125   -2.1232   -0.3136
   10  C                                                 7  C           -0.2182   -1.2043   -0.1777
   11  C                                                 8  C           -0.7148    0.1850    0.0269
   12  C                                                 9  C            0.1711    1.1900    0.1752
   13  C                                                10  C            2.0495   -0.3917   -0.0568
   14  C                                                11  C           -2.1960    0.4569    0.0663
   15  S                                                15  S            3.4646   -0.6541   -0.0948


 Interatomic Distance Matrix (Angstrom)
 --------------------------------------

   1)     0.000
   2)     4.871   0.000
   3)     4.154   1.033   0.000
   4)     4.422   3.397   2.459   0.000
   5)     2.860   2.480   2.233   4.028   0.000
   6)     5.259   4.262   3.399   1.032   5.060   0.000
   7)     2.876   2.073   1.359   2.806   1.222   3.838   0.000
   8)     2.149   3.411   2.471   2.407   2.352   3.327   1.490   0.000
   9)     3.199   3.870   2.837   1.422   3.552   2.126   2.451   1.348   0.000
  10)     4.809   2.140   1.424   1.424   3.527   2.143   2.412   2.825   2.467   0.000
  11)     1.110   4.665   3.835   3.797   2.864   4.605   2.594   1.506   2.480   4.331
          0.000
  12)     3.451   4.956   3.923   2.169   4.458   2.453   3.450   2.116   1.086   3.443
          2.687   0.000
  13)     1.808   4.871   4.154   4.422   2.859   5.259   2.876   2.149   3.199   4.809
          1.110   3.451   0.000
  14)     1.801   5.564   4.651   4.034   3.955   4.650   3.536   2.182   2.613   4.873
          1.111   2.345   1.801   0.000
  15)     6.224   2.695   2.484   2.484   4.717   2.701   3.725   4.265   3.784   1.440
          5.771   4.650   6.224   6.285   0.000

 Min. Distance =    1.0319
 Max. Distance =    6.2850


 =====================================
 S Y M M E T R Y ,   E L E C T R O N S
 =====================================
  
 Symmetry: NOSYM

 Irreducible Representations, including subspecies
 -------------------------------------------------
 A


 Configuration of Valence Electrons
 ==================================
 ( determined in the SCF procedure )

 Total:   37 (Spin-A)  + 37 (Spin-B)

 Net Charge: 0 (Nuclei minus Electrons)
 Spin polar: 0 (Spin_A minus Spin_B electrons)

 Aufbau principle for MO occupations will be applied through SCF cycle no.    5000
 Thereafter, the program will assign electrons to MOs that are spatially
 similar to the occupied MOs in a "reference" cycle ("KeepOrbitals").
 The reference cycle is always the PREVIOUS cycle: it will evolve with
 the SCF procedure.
1
 ***************************************************************************************************


                                      ****************************************
                                      *  B U I L D : (Fragments, Functions)  *
                                      ****************************************
  


 =======
 S F O s  ***  (Symmetrized Fragment Orbitals)  ***
 =======
  
 SFOs are linear combinations of (valence) Fragment Orbitals (FOs), such that the SFOs transform as the
 irreducible representations of the (molecular) symmetry group. Each SFO is therefore characterized by
 an irrep of the molecule and by a few (or only one) generating FOs.
 The SFOs constitute a symmetry-adapted basis for the Fock matrix. The MO eigenvector coefficients in
 this basis provide a direct interpretation of the MOs in terms of Frontier Orbital Theory.

 The SFOs are combined with auxiliary Core Functions (CFs) to ensure orthogonalization on the (frozen)
 Core Orbitals (COs). The Core-orthogonalized SFOs (CSFOs) constitute the true Fock basis.

 The FOs, and hence also the (C)SFOs are combinations of the elementary basis functions (BAS). The basis
 functions that participate in the description of the SFOs depend on the irrep. The indices of the
 involved functions are printed below for each irrep.
 (The complete list of primitive basis functions is printed in another section)

 Total nr. of (C)SFOs (summation over all irreps) :   308

 NOTE: a (C)SFO that is defined as a combination of more than one FO is usually NOT normalized.


                                       === A ===
 Nr. of SFOs :  308
 Cartesian basis functions that participate in this irrep (total number =   350) :
      1     2     3     4     5     6     7     8     9    10
     11    12    13    14    15    16    17    18    19    20
     21    22    23    24    25    26    27    28    29    30
     31    32    33    34    35    36    37    38    39    40
     41    42    43    44    45    46    47    48    49    50
     51    52    53    54    55    56    57    58    59    60
     61    62    63    64    65    66    67    68    69    70
     71    72    73    74    75    76    77    78    81    84
     79    82    85    80    83    86    87    88    89    90
     91    92    93    94    95    96    97    98    99   100
    101   102   103   104   105   106   107   108   111   114
    109   112   115   110   113   116   117   118   119   120
    121   122   123   124   125   126   127   128   129   130
    131   132   133   134   135   136   137   138   141   144
    139   142   145   140   143   146   147   148   149   150
    151   152   153   154   155   156   157   158   159   160
    161   162   163   164   165   166   167   168   171   174
    169   172   175   170   173   176   177   178   179   180
    181   182   183   184   185   186   187   188   189   190
    191   192   193   194   195   196   197   198   201   204
    199   202   205   200   203   206   207   208   209   210
    211   212   213   214   215   216   217   218   219   220
    221   222   223   224   225   226   227   228   231   234
    229   232   235   230   233   236   237   238   239   240
    241   242   243   244   245   246   247   248   249   250
    251   252   253   254   255   256   257   258   261   264
    259   262   265   260   263   266   267   268   269   270
    271   272   273   274   275   276   277   278   279   280
    281   282   283   284   285   286   287   288   291   294
    289   292   295   290   293   296   297   298   299   300
    301   302   303   304   305   306   307   308   309   310
    311   312   313   314   315   316   323   324   325   317
    320   326   329   332   318   321   327   330   333   319
    322   328   331   334   335   336   337   338   339   340
    341   342   343   344   345   346   347   348   349   350

    SFO  (index         Fragment          Generating    Expansion in Fragment Orbitals
  indx  incl.CFs)   Occup   Orb.Energy   FragmentType  Coeff.   Orbital     on Fragment
 --------------------------------------------------------------------------------------
     1       1      1.000      -0.239 au  H             1.00      1 S               1
                        (      -6.494 eV)
     2       2       --         0.091 au  H             1.00      2 S               1
                        (       2.470 eV)
     3       3       --         1.522 au  H             1.00      3 S               1
                        (      41.412 eV)
     4       4       --         0.405 au  H             1.00      1 P:x             1
                        (      11.031 eV)
     5       5       --         0.405 au  H             1.00      1 P:y             1
                        (      11.031 eV)
     6       6       --         0.405 au  H             1.00      1 P:z             1
                        (      11.031 eV)
     7       7       --         2.566 au  H             1.00      1 D:z2            1
                        (      69.819 eV)
     8       8       --         2.566 au  H             1.00      1 D:x2-y2         1
                        (      69.819 eV)
     9       9       --         2.566 au  H             1.00      1 D:xy            1
                        (      69.819 eV)
    10      10       --         2.566 au  H             1.00      1 D:xz            1
                        (      69.819 eV)
    11      11       --         2.566 au  H             1.00      1 D:yz            1
                        (      69.819 eV)
    12      12      1.000      -0.239 au  H             1.00      1 S               2
                        (      -6.494 eV)
    13      13       --         0.091 au  H             1.00      2 S               2
                        (       2.470 eV)
    14      14       --         1.522 au  H             1.00      3 S               2
                        (      41.412 eV)
    15      15       --         0.405 au  H             1.00      1 P:x             2
                        (      11.031 eV)
    16      16       --         0.405 au  H             1.00      1 P:y             2
                        (      11.031 eV)
    17      17       --         0.405 au  H             1.00      1 P:z             2
                        (      11.031 eV)
    18      18       --         2.566 au  H             1.00      1 D:z2            2
                        (      69.819 eV)
    19      19       --         2.566 au  H             1.00      1 D:x2-y2         2
                        (      69.819 eV)
    20      20       --         2.566 au  H             1.00      1 D:xy            2
                        (      69.819 eV)
    21      21       --         2.566 au  H             1.00      1 D:xz            2
                        (      69.819 eV)
    22      22       --         2.566 au  H             1.00      1 D:yz            2
                        (      69.819 eV)
    23      23      1.000      -0.239 au  H             1.00      1 S               3
                        (      -6.494 eV)
    24      24       --         0.091 au  H             1.00      2 S               3
                        (       2.470 eV)
    25      25       --         1.522 au  H             1.00      3 S               3
                        (      41.412 eV)
    26      26       --         0.405 au  H             1.00      1 P:x             3
                        (      11.031 eV)
    27      27       --         0.405 au  H             1.00      1 P:y             3
                        (      11.031 eV)
    28      28       --         0.405 au  H             1.00      1 P:z             3
                        (      11.031 eV)
    29      29       --         2.566 au  H             1.00      1 D:z2            3
                        (      69.819 eV)
    30      30       --         2.566 au  H             1.00      1 D:x2-y2         3
                        (      69.819 eV)
    31      31       --         2.566 au  H             1.00      1 D:xy            3
                        (      69.819 eV)
    32      32       --         2.566 au  H             1.00      1 D:xz            3
                        (      69.819 eV)
    33      33       --         2.566 au  H             1.00      1 D:yz            3
                        (      69.819 eV)
    34      34      1.000      -0.239 au  H             1.00      1 S               4
                        (      -6.494 eV)
    35      35       --         0.091 au  H             1.00      2 S               4
                        (       2.470 eV)
    36      36       --         1.522 au  H             1.00      3 S               4
                        (      41.412 eV)
    37      37       --         0.405 au  H             1.00      1 P:x             4
                        (      11.031 eV)
    38      38       --         0.405 au  H             1.00      1 P:y             4
                        (      11.031 eV)
    39      39       --         0.405 au  H             1.00      1 P:z             4
                        (      11.031 eV)
    40      40       --         2.566 au  H             1.00      1 D:z2            4
                        (      69.819 eV)
    41      41       --         2.566 au  H             1.00      1 D:x2-y2         4
                        (      69.819 eV)
    42      42       --         2.566 au  H             1.00      1 D:xy            4
                        (      69.819 eV)
    43      43       --         2.566 au  H             1.00      1 D:xz            4
                        (      69.819 eV)
    44      44       --         2.566 au  H             1.00      1 D:yz            4
                        (      69.819 eV)
    45      45      1.000      -0.239 au  H             1.00      1 S               5
                        (      -6.494 eV)
    46      46       --         0.091 au  H             1.00      2 S               5
                        (       2.470 eV)
    47      47       --         1.522 au  H             1.00      3 S               5
                        (      41.412 eV)
    48      48       --         0.405 au  H             1.00      1 P:x             5
                        (      11.031 eV)
    49      49       --         0.405 au  H             1.00      1 P:y             5
                        (      11.031 eV)
    50      50       --         0.405 au  H             1.00      1 P:z             5
                        (      11.031 eV)
    51      51       --         2.566 au  H             1.00      1 D:z2            5
                        (      69.819 eV)
    52      52       --         2.566 au  H             1.00      1 D:x2-y2         5
                        (      69.819 eV)
    53      53       --         2.566 au  H             1.00      1 D:xy            5
                        (      69.819 eV)
    54      54       --         2.566 au  H             1.00      1 D:xz            5
                        (      69.819 eV)
    55      55       --         2.566 au  H             1.00      1 D:yz            5
                        (      69.819 eV)
    56      56      1.000      -0.239 au  H             1.00      1 S               6
                        (      -6.494 eV)
    57      57       --         0.091 au  H             1.00      2 S               6
                        (       2.470 eV)
    58      58       --         1.522 au  H             1.00      3 S               6
                        (      41.412 eV)
    59      59       --         0.405 au  H             1.00      1 P:x             6
                        (      11.031 eV)
    60      60       --         0.405 au  H             1.00      1 P:y             6
                        (      11.031 eV)
    61      61       --         0.405 au  H             1.00      1 P:z             6
                        (      11.031 eV)
    62      62       --         2.566 au  H             1.00      1 D:z2            6
                        (      69.819 eV)
    63      63       --         2.566 au  H             1.00      1 D:x2-y2         6
                        (      69.819 eV)
    64      64       --         2.566 au  H             1.00      1 D:xy            6
                        (      69.819 eV)
    65      65       --         2.566 au  H             1.00      1 D:xz            6
                        (      69.819 eV)
    66      66       --         2.566 au  H             1.00      1 D:yz            6
                        (      69.819 eV)
    67      67      2.000     -14.145 au  N             1.00      1 S               7
                        (    -384.911 eV)
    68      68      2.000      -0.684 au  N             1.00      2 S               7
                        (     -18.605 eV)
    69      69       --         0.521 au  N             1.00      3 S               7
                        (      14.167 eV)
    70      70       --         6.897 au  N             1.00      4 S               7
                        (     187.685 eV)
    71      71       --        63.710 au  N             1.00      5 S               7
                        (    1733.647 eV)
    72      72      1.000      -0.261 au  N             1.00      1 P:x             7
                        (      -7.102 eV)
    73      73       --         0.286 au  N             1.00      2 P:x             7
                        (       7.785 eV)
    74      74       --         3.292 au  N             1.00      3 P:x             7
                        (      89.580 eV)
    75      75      1.000      -0.261 au  N             1.00      1 P:y             7
                        (      -7.102 eV)
    76      76       --         0.286 au  N             1.00      2 P:y             7
                        (       7.785 eV)
    77      77       --         3.292 au  N             1.00      3 P:y             7
                        (      89.580 eV)
    78      78      1.000      -0.261 au  N             1.00      1 P:z             7
                        (      -7.102 eV)
    79      79       --         0.286 au  N             1.00      2 P:z             7
                        (       7.785 eV)
    80      80       --         3.292 au  N             1.00      3 P:z             7
                        (      89.580 eV)
    81      81       --         1.242 au  N             1.00      1 D:z2            7
                        (      33.805 eV)
    82      82       --         1.242 au  N             1.00      1 D:x2-y2         7
                        (      33.805 eV)
    83      83       --         1.242 au  N             1.00      1 D:xy            7
                        (      33.805 eV)
    84      84       --         1.242 au  N             1.00      1 D:xz            7
                        (      33.805 eV)
    85      85       --         1.242 au  N             1.00      1 D:yz            7
                        (      33.805 eV)
    86      86       --         4.003 au  N             1.00      1 F:z3            7
                        (     108.938 eV)
    87      87       --         4.003 au  N             1.00      1 F:z             7
                        (     108.938 eV)
    88      88       --         4.003 au  N             1.00      1 F:xyz           7
                        (     108.938 eV)
    89      89       --         4.003 au  N             1.00      1 F:z2x           7
                        (     108.938 eV)
    90      90       --         4.003 au  N             1.00      1 F:z2y           7
                        (     108.938 eV)
    91      91       --         4.003 au  N             1.00      1 F:x             7
                        (     108.938 eV)
    92      92       --         4.003 au  N             1.00      1 F:y             7
                        (     108.938 eV)
    93      93      2.000     -14.145 au  N             1.00      1 S               8
                        (    -384.911 eV)
    94      94      2.000      -0.684 au  N             1.00      2 S               8
                        (     -18.605 eV)
    95      95       --         0.521 au  N             1.00      3 S               8
                        (      14.167 eV)
    96      96       --         6.897 au  N             1.00      4 S               8
                        (     187.685 eV)
    97      97       --        63.710 au  N             1.00      5 S               8
                        (    1733.647 eV)
    98      98      1.000      -0.261 au  N             1.00      1 P:x             8
                        (      -7.102 eV)
    99      99       --         0.286 au  N             1.00      2 P:x             8
                        (       7.785 eV)
   100     100       --         3.292 au  N             1.00      3 P:x             8
                        (      89.580 eV)
   101     101      1.000      -0.261 au  N             1.00      1 P:y             8
                        (      -7.102 eV)
   102     102       --         0.286 au  N             1.00      2 P:y             8
                        (       7.785 eV)
   103     103       --         3.292 au  N             1.00      3 P:y             8
                        (      89.580 eV)
   104     104      1.000      -0.261 au  N             1.00      1 P:z             8
                        (      -7.102 eV)
   105     105       --         0.286 au  N             1.00      2 P:z             8
                        (       7.785 eV)
   106     106       --         3.292 au  N             1.00      3 P:z             8
                        (      89.580 eV)
   107     107       --         1.242 au  N             1.00      1 D:z2            8
                        (      33.805 eV)
   108     108       --         1.242 au  N             1.00      1 D:x2-y2         8
                        (      33.805 eV)
   109     109       --         1.242 au  N             1.00      1 D:xy            8
                        (      33.805 eV)
   110     110       --         1.242 au  N             1.00      1 D:xz            8
                        (      33.805 eV)
   111     111       --         1.242 au  N             1.00      1 D:yz            8
                        (      33.805 eV)
   112     112       --         4.003 au  N             1.00      1 F:z3            8
                        (     108.938 eV)
   113     113       --         4.003 au  N             1.00      1 F:z             8
                        (     108.938 eV)
   114     114       --         4.003 au  N             1.00      1 F:xyz           8
                        (     108.938 eV)
   115     115       --         4.003 au  N             1.00      1 F:z2x           8
                        (     108.938 eV)
   116     116       --         4.003 au  N             1.00      1 F:z2y           8
                        (     108.938 eV)
   117     117       --         4.003 au  N             1.00      1 F:x             8
                        (     108.938 eV)
   118     118       --         4.003 au  N             1.00      1 F:y             8
                        (     108.938 eV)
   119     119      2.000     -18.928 au  O             1.00      1 S               9
                        (    -515.063 eV)
   120     120      2.000      -0.882 au  O             1.00      2 S               9
                        (     -23.988 eV)
   121     121       --         0.795 au  O             1.00      3 S               9
                        (      21.640 eV)
   122     122       --        13.464 au  O             1.00      4 S               9
                        (     366.386 eV)
   123     123       --       122.385 au  O             1.00      5 S               9
                        (    3330.270 eV)
   124     124      1.333      -0.332 au  O             1.00      1 P:x             9
                        (      -9.043 eV)
   125     125       --         0.353 au  O             1.00      2 P:x             9
                        (       9.607 eV)
   126     126       --         3.838 au  O             1.00      3 P:x             9
                        (     104.449 eV)
   127     127      1.333      -0.332 au  O             1.00      1 P:y             9
                        (      -9.043 eV)
   128     128       --         0.353 au  O             1.00      2 P:y             9
                        (       9.607 eV)
   129     129       --         3.838 au  O             1.00      3 P:y             9
                        (     104.449 eV)
   130     130      1.333      -0.332 au  O             1.00      1 P:z             9
                        (      -9.043 eV)
   131     131       --         0.353 au  O             1.00      2 P:z             9
                        (       9.607 eV)
   132     132       --         3.838 au  O             1.00      3 P:z             9
                        (     104.449 eV)
   133     133       --         1.067 au  O             1.00      1 D:z2            9
                        (      29.041 eV)
   134     134       --         1.067 au  O             1.00      1 D:x2-y2         9
                        (      29.041 eV)
   135     135       --         1.067 au  O             1.00      1 D:xy            9
                        (      29.041 eV)
   136     136       --         1.067 au  O             1.00      1 D:xz            9
                        (      29.041 eV)
   137     137       --         1.067 au  O             1.00      1 D:yz            9
                        (      29.041 eV)
   138     138       --         3.353 au  O             1.00      1 F:z3            9
                        (      91.229 eV)
   139     139       --         3.353 au  O             1.00      1 F:z             9
                        (      91.229 eV)
   140     140       --         3.353 au  O             1.00      1 F:xyz           9
                        (      91.229 eV)
   141     141       --         3.353 au  O             1.00      1 F:z2x           9
                        (      91.229 eV)
   142     142       --         3.353 au  O             1.00      1 F:z2y           9
                        (      91.229 eV)
   143     143       --         3.353 au  O             1.00      1 F:x             9
                        (      91.229 eV)
   144     144       --         3.353 au  O             1.00      1 F:y             9
                        (      91.229 eV)
   145     145      2.000     -10.051 au  C             1.00      1 S              10
                        (    -273.488 eV)
   146     146      2.000      -0.506 au  C             1.00      2 S              10
                        (     -13.774 eV)
   147     147       --         0.376 au  C             1.00      3 S              10
                        (      10.242 eV)
   148     148       --         5.428 au  C             1.00      4 S              10
                        (     147.709 eV)
   149     149       --        50.037 au  C             1.00      5 S              10
                        (    1361.567 eV)
   150     150      0.667      -0.195 au  C             1.00      1 P:x            10
                        (      -5.296 eV)
   151     151       --         0.172 au  C             1.00      2 P:x            10
                        (       4.669 eV)
   152     152       --         2.028 au  C             1.00      3 P:x            10
                        (      55.182 eV)
   153     153      0.667      -0.195 au  C             1.00      1 P:y            10
                        (      -5.296 eV)
   154     154       --         0.172 au  C             1.00      2 P:y            10
                        (       4.669 eV)
   155     155       --         2.028 au  C             1.00      3 P:y            10
                        (      55.182 eV)
   156     156      0.667      -0.195 au  C             1.00      1 P:z            10
                        (      -5.296 eV)
   157     157       --         0.172 au  C             1.00      2 P:z            10
                        (       4.669 eV)
   158     158       --         2.028 au  C             1.00      3 P:z            10
                        (      55.182 eV)
   159     159       --         1.235 au  C             1.00      1 D:z2           10
                        (      33.617 eV)
   160     160       --         1.235 au  C             1.00      1 D:x2-y2        10
                        (      33.617 eV)
   161     161       --         1.235 au  C             1.00      1 D:xy           10
                        (      33.617 eV)
   162     162       --         1.235 au  C             1.00      1 D:xz           10
                        (      33.617 eV)
   163     163       --         1.235 au  C             1.00      1 D:yz           10
                        (      33.617 eV)
   164     164       --         4.008 au  C             1.00      1 F:z3           10
                        (     109.074 eV)
   165     165       --         4.008 au  C             1.00      1 F:z            10
                        (     109.074 eV)
   166     166       --         4.008 au  C             1.00      1 F:xyz          10
                        (     109.074 eV)
   167     167       --         4.008 au  C             1.00      1 F:z2x          10
                        (     109.074 eV)
   168     168       --         4.008 au  C             1.00      1 F:z2y          10
                        (     109.074 eV)
   169     169       --         4.008 au  C             1.00      1 F:x            10
                        (     109.074 eV)
   170     170       --         4.008 au  C             1.00      1 F:y            10
                        (     109.074 eV)
   171     171      2.000     -10.051 au  C             1.00      1 S              11
                        (    -273.488 eV)
   172     172      2.000      -0.506 au  C             1.00      2 S              11
                        (     -13.774 eV)
   173     173       --         0.376 au  C             1.00      3 S              11
                        (      10.242 eV)
   174     174       --         5.428 au  C             1.00      4 S              11
                        (     147.709 eV)
   175     175       --        50.037 au  C             1.00      5 S              11
                        (    1361.567 eV)
   176     176      0.667      -0.195 au  C             1.00      1 P:x            11
                        (      -5.296 eV)
   177     177       --         0.172 au  C             1.00      2 P:x            11
                        (       4.669 eV)
   178     178       --         2.028 au  C             1.00      3 P:x            11
                        (      55.182 eV)
   179     179      0.667      -0.195 au  C             1.00      1 P:y            11
                        (      -5.296 eV)
   180     180       --         0.172 au  C             1.00      2 P:y            11
                        (       4.669 eV)
   181     181       --         2.028 au  C             1.00      3 P:y            11
                        (      55.182 eV)
   182     182      0.667      -0.195 au  C             1.00      1 P:z            11
                        (      -5.296 eV)
   183     183       --         0.172 au  C             1.00      2 P:z            11
                        (       4.669 eV)
   184     184       --         2.028 au  C             1.00      3 P:z            11
                        (      55.182 eV)
   185     185       --         1.235 au  C             1.00      1 D:z2           11
                        (      33.617 eV)
   186     186       --         1.235 au  C             1.00      1 D:x2-y2        11
                        (      33.617 eV)
   187     187       --         1.235 au  C             1.00      1 D:xy           11
                        (      33.617 eV)
   188     188       --         1.235 au  C             1.00      1 D:xz           11
                        (      33.617 eV)
   189     189       --         1.235 au  C             1.00      1 D:yz           11
                        (      33.617 eV)
   190     190       --         4.008 au  C             1.00      1 F:z3           11
                        (     109.074 eV)
   191     191       --         4.008 au  C             1.00      1 F:z            11
                        (     109.074 eV)
   192     192       --         4.008 au  C             1.00      1 F:xyz          11
                        (     109.074 eV)
   193     193       --         4.008 au  C             1.00      1 F:z2x          11
                        (     109.074 eV)
   194     194       --         4.008 au  C             1.00      1 F:z2y          11
                        (     109.074 eV)
   195     195       --         4.008 au  C             1.00      1 F:x            11
                        (     109.074 eV)
   196     196       --         4.008 au  C             1.00      1 F:y            11
                        (     109.074 eV)
   197     197      2.000     -10.051 au  C             1.00      1 S              12
                        (    -273.488 eV)
   198     198      2.000      -0.506 au  C             1.00      2 S              12
                        (     -13.774 eV)
   199     199       --         0.376 au  C             1.00      3 S              12
                        (      10.242 eV)
   200     200       --         5.428 au  C             1.00      4 S              12
                        (     147.709 eV)
   201     201       --        50.037 au  C             1.00      5 S              12
                        (    1361.567 eV)
   202     202      0.667      -0.195 au  C             1.00      1 P:x            12
                        (      -5.296 eV)
   203     203       --         0.172 au  C             1.00      2 P:x            12
                        (       4.669 eV)
   204     204       --         2.028 au  C             1.00      3 P:x            12
                        (      55.182 eV)
   205     205      0.667      -0.195 au  C             1.00      1 P:y            12
                        (      -5.296 eV)
   206     206       --         0.172 au  C             1.00      2 P:y            12
                        (       4.669 eV)
   207     207       --         2.028 au  C             1.00      3 P:y            12
                        (      55.182 eV)
   208     208      0.667      -0.195 au  C             1.00      1 P:z            12
                        (      -5.296 eV)
   209     209       --         0.172 au  C             1.00      2 P:z            12
                        (       4.669 eV)
   210     210       --         2.028 au  C             1.00      3 P:z            12
                        (      55.182 eV)
   211     211       --         1.235 au  C             1.00      1 D:z2           12
                        (      33.617 eV)
   212     212       --         1.235 au  C             1.00      1 D:x2-y2        12
                        (      33.617 eV)
   213     213       --         1.235 au  C             1.00      1 D:xy           12
                        (      33.617 eV)
   214     214       --         1.235 au  C             1.00      1 D:xz           12
                        (      33.617 eV)
   215     215       --         1.235 au  C             1.00      1 D:yz           12
                        (      33.617 eV)
   216     216       --         4.008 au  C             1.00      1 F:z3           12
                        (     109.074 eV)
   217     217       --         4.008 au  C             1.00      1 F:z            12
                        (     109.074 eV)
   218     218       --         4.008 au  C             1.00      1 F:xyz          12
                        (     109.074 eV)
   219     219       --         4.008 au  C             1.00      1 F:z2x          12
                        (     109.074 eV)
   220     220       --         4.008 au  C             1.00      1 F:z2y          12
                        (     109.074 eV)
   221     221       --         4.008 au  C             1.00      1 F:x            12
                        (     109.074 eV)
   222     222       --         4.008 au  C             1.00      1 F:y            12
                        (     109.074 eV)
   223     223      2.000     -10.051 au  C             1.00      1 S              13
                        (    -273.488 eV)
   224     224      2.000      -0.506 au  C             1.00      2 S              13
                        (     -13.774 eV)
   225     225       --         0.376 au  C             1.00      3 S              13
                        (      10.242 eV)
   226     226       --         5.428 au  C             1.00      4 S              13
                        (     147.709 eV)
   227     227       --        50.037 au  C             1.00      5 S              13
                        (    1361.567 eV)
   228     228      0.667      -0.195 au  C             1.00      1 P:x            13
                        (      -5.296 eV)
   229     229       --         0.172 au  C             1.00      2 P:x            13
                        (       4.669 eV)
   230     230       --         2.028 au  C             1.00      3 P:x            13
                        (      55.182 eV)
   231     231      0.667      -0.195 au  C             1.00      1 P:y            13
                        (      -5.296 eV)
   232     232       --         0.172 au  C             1.00      2 P:y            13
                        (       4.669 eV)
   233     233       --         2.028 au  C             1.00      3 P:y            13
                        (      55.182 eV)
   234     234      0.667      -0.195 au  C             1.00      1 P:z            13
                        (      -5.296 eV)
   235     235       --         0.172 au  C             1.00      2 P:z            13
                        (       4.669 eV)
   236     236       --         2.028 au  C             1.00      3 P:z            13
                        (      55.182 eV)
   237     237       --         1.235 au  C             1.00      1 D:z2           13
                        (      33.617 eV)
   238     238       --         1.235 au  C             1.00      1 D:x2-y2        13
                        (      33.617 eV)
   239     239       --         1.235 au  C             1.00      1 D:xy           13
                        (      33.617 eV)
   240     240       --         1.235 au  C             1.00      1 D:xz           13
                        (      33.617 eV)
   241     241       --         1.235 au  C             1.00      1 D:yz           13
                        (      33.617 eV)
   242     242       --         4.008 au  C             1.00      1 F:z3           13
                        (     109.074 eV)
   243     243       --         4.008 au  C             1.00      1 F:z            13
                        (     109.074 eV)
   244     244       --         4.008 au  C             1.00      1 F:xyz          13
                        (     109.074 eV)
   245     245       --         4.008 au  C             1.00      1 F:z2x          13
                        (     109.074 eV)
   246     246       --         4.008 au  C             1.00      1 F:z2y          13
                        (     109.074 eV)
   247     247       --         4.008 au  C             1.00      1 F:x            13
                        (     109.074 eV)
   248     248       --         4.008 au  C             1.00      1 F:y            13
                        (     109.074 eV)
   249     249      2.000     -10.051 au  C             1.00      1 S              14
                        (    -273.488 eV)
   250     250      2.000      -0.506 au  C             1.00      2 S              14
                        (     -13.774 eV)
   251     251       --         0.376 au  C             1.00      3 S              14
                        (      10.242 eV)
   252     252       --         5.428 au  C             1.00      4 S              14
                        (     147.709 eV)
   253     253       --        50.037 au  C             1.00      5 S              14
                        (    1361.567 eV)
   254     254      0.667      -0.195 au  C             1.00      1 P:x            14
                        (      -5.296 eV)
   255     255       --         0.172 au  C             1.00      2 P:x            14
                        (       4.669 eV)
   256     256       --         2.028 au  C             1.00      3 P:x            14
                        (      55.182 eV)
   257     257      0.667      -0.195 au  C             1.00      1 P:y            14
                        (      -5.296 eV)
   258     258       --         0.172 au  C             1.00      2 P:y            14
                        (       4.669 eV)
   259     259       --         2.028 au  C             1.00      3 P:y            14
                        (      55.182 eV)
   260     260      0.667      -0.195 au  C             1.00      1 P:z            14
                        (      -5.296 eV)
   261     261       --         0.172 au  C             1.00      2 P:z            14
                        (       4.669 eV)
   262     262       --         2.028 au  C             1.00      3 P:z            14
                        (      55.182 eV)
   263     263       --         1.235 au  C             1.00      1 D:z2           14
                        (      33.617 eV)
   264     264       --         1.235 au  C             1.00      1 D:x2-y2        14
                        (      33.617 eV)
   265     265       --         1.235 au  C             1.00      1 D:xy           14
                        (      33.617 eV)
   266     266       --         1.235 au  C             1.00      1 D:xz           14
                        (      33.617 eV)
   267     267       --         1.235 au  C             1.00      1 D:yz           14
                        (      33.617 eV)
   268     268       --         4.008 au  C             1.00      1 F:z3           14
                        (     109.074 eV)
   269     269       --         4.008 au  C             1.00      1 F:z            14
                        (     109.074 eV)
   270     270       --         4.008 au  C             1.00      1 F:xyz          14
                        (     109.074 eV)
   271     271       --         4.008 au  C             1.00      1 F:z2x          14
                        (     109.074 eV)
   272     272       --         4.008 au  C             1.00      1 F:z2y          14
                        (     109.074 eV)
   273     273       --         4.008 au  C             1.00      1 F:x            14
                        (     109.074 eV)
   274     274       --         4.008 au  C             1.00      1 F:y            14
                        (     109.074 eV)
   275     275      2.000     -88.666 au  S             1.00      1 S              15
                        (   -2412.724 eV)
   276     276      2.000      -7.777 au  S             1.00      2 S              15
                        (    -211.629 eV)
   277     277      2.000      -0.634 au  S             1.00      3 S              15
                        (     -17.254 eV)
   278     278       --         0.195 au  S             1.00      4 S              15
                        (       5.295 eV)
   279     279       --         2.036 au  S             1.00      5 S              15
                        (      55.389 eV)
   280     280       --        12.568 au  S             1.00      6 S              15
                        (     342.006 eV)
   281     281       --       194.403 au  S             1.00      7 S              15
                        (    5289.987 eV)
   282     282      2.000      -5.744 au  S             1.00      1 P:x            15
                        (    -156.301 eV)
   283     283      1.333      -0.257 au  S             1.00      2 P:x            15
                        (      -7.003 eV)
   284     284       --         0.130 au  S             1.00      3 P:x            15
                        (       3.550 eV)
   285     285       --         1.210 au  S             1.00      4 P:x            15
                        (      32.917 eV)
   286     286       --        12.969 au  S             1.00      5 P:x            15
                        (     352.905 eV)
   287     287      2.000      -5.744 au  S             1.00      1 P:y            15
                        (    -156.301 eV)
   288     288      1.333      -0.257 au  S             1.00      2 P:y            15
                        (      -7.003 eV)
   289     289       --         0.130 au  S             1.00      3 P:y            15
                        (       3.550 eV)
   290     290       --         1.210 au  S             1.00      4 P:y            15
                        (      32.917 eV)
   291     291       --        12.969 au  S             1.00      5 P:y            15
                        (     352.905 eV)
   292     292      2.000      -5.744 au  S             1.00      1 P:z            15
                        (    -156.301 eV)
   293     293      1.333      -0.257 au  S             1.00      2 P:z            15
                        (      -7.003 eV)
   294     294       --         0.130 au  S             1.00      3 P:z            15
                        (       3.550 eV)
   295     295       --         1.210 au  S             1.00      4 P:z            15
                        (      32.917 eV)
   296     296       --        12.969 au  S             1.00      5 P:z            15
                        (     352.905 eV)
   297     297       --         0.429 au  S             1.00      1 D:z2           15
                        (      11.674 eV)
   298     298       --         0.429 au  S             1.00      1 D:x2-y2        15
                        (      11.674 eV)
   299     299       --         0.429 au  S             1.00      1 D:xy           15
                        (      11.674 eV)
   300     300       --         0.429 au  S             1.00      1 D:xz           15
                        (      11.674 eV)
   301     301       --         0.429 au  S             1.00      1 D:yz           15
                        (      11.674 eV)
   302     302       --         1.269 au  S             1.00      1 F:z3           15
                        (      34.531 eV)
   303     303       --         1.269 au  S             1.00      1 F:z            15
                        (      34.531 eV)
   304     304       --         1.269 au  S             1.00      1 F:xyz          15
                        (      34.531 eV)
   305     305       --         1.269 au  S             1.00      1 F:z2x          15
                        (      34.531 eV)
   306     306       --         1.269 au  S             1.00      1 F:z2y          15
                        (      34.531 eV)
   307     307       --         1.269 au  S             1.00      1 F:x            15
                        (      34.531 eV)
   308     308       --         1.269 au  S             1.00      1 F:y            15
                        (      34.531 eV)


 ================================
 (Slater-type)  F U N C T I O N S  ***  (Basis and Fit)  ***
 ================================
  

 Atom Type    1  (H)
 ==============

 Valence Basis Sets:   5
 -----------------------
   1 S    0.690000
   1 S    0.920000
   1 S    1.580000
   2 P    1.250000
   3 D    2.500000

 Atom Type    2  (N)
 ==============

 Valence Basis Sets:  10
 -----------------------
   1 S    8.740000
   1 S    5.900000
   2 S    5.150000
   2 S    2.500000
   2 S    1.500000
   2 P    3.680000
   2 P    1.880000
   2 P    1.000000
   3 D    2.200000
   4 F    3.300000

 Atom Type    3  (O)
 ==============

 Valence Basis Sets:  10
 -----------------------
   1 S    9.800000
   1 S    6.800000
   2 S    7.580000
   2 S    2.880000
   2 S    1.720000
   2 P    4.080000
   2 P    2.080000
   2 P    1.120000
   3 D    2.000000
   4 F    3.000000

 Atom Type    4  (C)
 ==============

 Valence Basis Sets:  10
 -----------------------
   1 S    7.680000
   1 S    5.000000
   2 S    1.280000
   2 S    2.100000
   2 S    4.600000
   2 P    0.820000
   2 P    1.480000
   2 P    2.940000
   3 D    2.200000
   4 F    3.300000

 Atom Type    5  (S)
 ==============

 Valence Basis Sets:  14
 -----------------------
   1 S   19.400000
   1 S   14.350000
   2 S    5.900000
   2 S    4.250000
   2 P    8.050000
   2 P    4.550000
   3 S    3.450000
   3 S    2.250000
   3 S    1.500000
   3 P    2.650000
   3 P    1.600000
   3 P    1.000000
   3 D    2.100000
   4 F    2.100000


 BAS: List of all Elementary Cartesian Basis Functions
 =====================================================

 The numbering in the list below (to the right of the function characteristics) is referred
 to in print-outs of MO eigenvectors and Mulliken populations in the BAS representation
 (as contrasted to the SFO representation).

 Notes:
 1. The functions are characterized by a polynomial prefactor (powers of x,y,z and r) and
    an exponential decay factor alpha.
 2. Since the basis sets are specific for an atom TYPE, the individual functions occur on
    all atoms of that type.
 3. The word 'Core' in the left margin signals that it is a Core Function (CF) : not a
    degree of freedom in the valence set, but only used to ensure orthogonalization of
    the other valence basis functions on the frozen Core Orbitals.


 (power of) X  Y  Z  R     Alpha  on Atom
            ==========     =====     ==========

 H                                    1    2    3    4    5    6
                                  ---------------------------------------------------------------------------
            0  0  0  0     0.690      1   13   25   37   49   61
            0  0  0  0     0.920      2   14   26   38   50   62
            0  0  0  0     1.580      3   15   27   39   51   63
            1  0  0  0     1.250      4   16   28   40   52   64
            0  1  0  0     1.250      5   17   29   41   53   65
            0  0  1  0     1.250      6   18   30   42   54   66
            2  0  0  0     2.500      7   19   31   43   55   67
            1  1  0  0     2.500      8   20   32   44   56   68
            1  0  1  0     2.500      9   21   33   45   57   69
            0  2  0  0     2.500     10   22   34   46   58   70
            0  1  1  0     2.500     11   23   35   47   59   71
            0  0  2  0     2.500     12   24   36   48   60   72

 N                                    7    8
                                  ---------------------------------------------------------------------------
            0  0  0  0     8.740     73  103
            0  0  0  0     5.900     74  104
            0  0  0  1     5.150     75  105
            0  0  0  1     2.500     76  106
            0  0  0  1     1.500     77  107
            1  0  0  0     3.680     78  108
            0  1  0  0     3.680     79  109
            0  0  1  0     3.680     80  110
            1  0  0  0     1.880     81  111
            0  1  0  0     1.880     82  112
            0  0  1  0     1.880     83  113
            1  0  0  0     1.000     84  114
            0  1  0  0     1.000     85  115
            0  0  1  0     1.000     86  116
            2  0  0  0     2.200     87  117
            1  1  0  0     2.200     88  118
            1  0  1  0     2.200     89  119
            0  2  0  0     2.200     90  120
            0  1  1  0     2.200     91  121
            0  0  2  0     2.200     92  122
            3  0  0  0     3.300     93  123
            2  1  0  0     3.300     94  124
            2  0  1  0     3.300     95  125
            1  2  0  0     3.300     96  126
            1  1  1  0     3.300     97  127
            1  0  2  0     3.300     98  128
            0  3  0  0     3.300     99  129
            0  2  1  0     3.300    100  130
            0  1  2  0     3.300    101  131
            0  0  3  0     3.300    102  132

 O                                    9
                                  ---------------------------------------------------------------------------
            0  0  0  0     9.800    133
            0  0  0  0     6.800    134
            0  0  0  1     7.580    135
            0  0  0  1     2.880    136
            0  0  0  1     1.720    137
            1  0  0  0     4.080    138
            0  1  0  0     4.080    139
            0  0  1  0     4.080    140
            1  0  0  0     2.080    141
            0  1  0  0     2.080    142
            0  0  1  0     2.080    143
            1  0  0  0     1.120    144
            0  1  0  0     1.120    145
            0  0  1  0     1.120    146
            2  0  0  0     2.000    147
            1  1  0  0     2.000    148
            1  0  1  0     2.000    149
            0  2  0  0     2.000    150
            0  1  1  0     2.000    151
            0  0  2  0     2.000    152
            3  0  0  0     3.000    153
            2  1  0  0     3.000    154
            2  0  1  0     3.000    155
            1  2  0  0     3.000    156
            1  1  1  0     3.000    157
            1  0  2  0     3.000    158
            0  3  0  0     3.000    159
            0  2  1  0     3.000    160
            0  1  2  0     3.000    161
            0  0  3  0     3.000    162

 C                                   10   11   12   13   14
                                  ---------------------------------------------------------------------------
            0  0  0  0     7.680    163  193  223  253  283
            0  0  0  0     5.000    164  194  224  254  284
            0  0  0  1     1.280    165  195  225  255  285
            0  0  0  1     2.100    166  196  226  256  286
            0  0  0  1     4.600    167  197  227  257  287
            1  0  0  0     0.820    168  198  228  258  288
            0  1  0  0     0.820    169  199  229  259  289
            0  0  1  0     0.820    170  200  230  260  290
            1  0  0  0     1.480    171  201  231  261  291
            0  1  0  0     1.480    172  202  232  262  292
            0  0  1  0     1.480    173  203  233  263  293
            1  0  0  0     2.940    174  204  234  264  294
            0  1  0  0     2.940    175  205  235  265  295
            0  0  1  0     2.940    176  206  236  266  296
            2  0  0  0     2.200    177  207  237  267  297
            1  1  0  0     2.200    178  208  238  268  298
            1  0  1  0     2.200    179  209  239  269  299
            0  2  0  0     2.200    180  210  240  270  300
            0  1  1  0     2.200    181  211  241  271  301
            0  0  2  0     2.200    182  212  242  272  302
            3  0  0  0     3.300    183  213  243  273  303
            2  1  0  0     3.300    184  214  244  274  304
            2  0  1  0     3.300    185  215  245  275  305
            1  2  0  0     3.300    186  216  246  276  306
            1  1  1  0     3.300    187  217  247  277  307
            1  0  2  0     3.300    188  218  248  278  308
            0  3  0  0     3.300    189  219  249  279  309
            0  2  1  0     3.300    190  220  250  280  310
            0  1  2  0     3.300    191  221  251  281  311
            0  0  3  0     3.300    192  222  252  282  312

 S                                   15
                                  ---------------------------------------------------------------------------
            0  0  0  0    19.400    313
            0  0  0  0    14.350    314
            0  0  0  1     5.900    315
            0  0  0  1     4.250    316
            1  0  0  0     8.050    317
            0  1  0  0     8.050    318
            0  0  1  0     8.050    319
            1  0  0  0     4.550    320
            0  1  0  0     4.550    321
            0  0  1  0     4.550    322
            0  0  0  2     3.450    323
            0  0  0  2     2.250    324
            0  0  0  2     1.500    325
            1  0  0  1     2.650    326
            0  1  0  1     2.650    327
            0  0  1  1     2.650    328
            1  0  0  1     1.600    329
            0  1  0  1     1.600    330
            0  0  1  1     1.600    331
            1  0  0  1     1.000    332
            0  1  0  1     1.000    333
            0  0  1  1     1.000    334
            2  0  0  0     2.100    335
            1  1  0  0     2.100    336
            1  0  1  0     2.100    337
            0  2  0  0     2.100    338
            0  1  1  0     2.100    339
            0  0  2  0     2.100    340
            3  0  0  0     2.100    341
            2  1  0  0     2.100    342
            2  0  1  0     2.100    343
            1  2  0  0     2.100    344
            1  1  1  0     2.100    345
            1  0  2  0     2.100    346
            0  3  0  0     2.100    347
            0  2  1  0     2.100    348
            0  1  2  0     2.100    349
            0  0  3  0     2.100    350

 Total number of charge fitting functions (nprimf)      1078
 Total number of Cartesian basis functions (naos)        350
 Total number of Cartesian core functions  (ncos)          0


 Coordinates (Cartesian)
 =======================

     Atom                    bohr                                 angstrom                 Geometric Variables
                   X           Y           Z              X           Y           Z       (0:frozen, *:LT par.)
 --------------------------------------------------------------------------------------------------------------
     1 H      -5.019302    0.271365   -1.689604      -2.656100    0.143600   -0.894100      1       2       3
     2 H       2.737646   -4.580507   -0.674065       1.448700   -2.423900   -0.356700      4       5       6
     3 N       2.109690   -2.752008   -0.404779       1.116400   -1.456300   -0.214200      7       8       9
     4 N       2.966870    1.766138    0.261916       1.570000    0.934600    0.138600     10      11      12
     5 O      -1.913348   -4.012267   -0.592618      -1.012500   -2.123200   -0.313600     13      14      15
     6 H       4.209932    3.252408    0.481691       2.227800    1.721100    0.254900     16      17      18
     7 C      -0.412338   -2.275797   -0.335804      -0.218200   -1.204300   -0.177700     19      20      21
     8 C      -1.350776    0.349599    0.050834      -0.714800    0.185000    0.026900     22      23      24
     9 C       0.323332    2.248774    0.331004       0.171100    1.190000    0.175160     25      26      27
    10 C       3.872994   -0.740206   -0.107336       2.049500   -0.391700   -0.056800     28      29      30
    11 C      -4.149839    0.863416    0.125289      -2.196000    0.456900    0.066300     31      32      33
    12 H      -0.330891    4.173838    0.615295      -0.175100    2.208700    0.325600     34      35      36
    13 H      -5.021002   -0.227334    1.691305      -2.657000   -0.120300    0.895000     37      38      39
    14 H      -4.570303    2.898840    0.425188      -2.418500    1.534000    0.225000     40      41      42
    15 S       6.547145   -1.236070   -0.179146       3.464600   -0.654100   -0.094800     43      44      45
 --------------------------------------------------------------------------------------------------------------
1
 ***************************************************************************************************


                                              ***********************
                                              *  T E C H N I C A L  *
                                              ***********************
  


 =============================================================
 P A R A L L E L I Z A T I O N  and  V E C T O R I Z A T I O N
 =============================================================
  
 Nr of parallel processes:                               16
 Maximum vector length in NumInt loops:                 128

 IO buffersize (Mb):                                     64.000000


 ===============================
 G E O M E T R Y   U P D A T E S
 ===============================
  
 Optimization coordinates:                       Delocalized
 Optimization code branch:                       NEW
 Hessian update method:                          BFGS (Broyden-Fletcher-Goldfarb-Shanno)

 Iterative Geometry Improvements:
    Max. nr. of iterations:                         90
    Convergence criteria:
         Change in energy (hartree):                 0.0010000000
         Gradients (au/Angstrom):                    0.0010000000
         Cart/bondlength changes (Angstrom):         0.0100000000
    Max. step to take:
         Trust Radius:                               0.2000000000

 GDIIS (Geometry Direct Inversion in Iteration Space):
    First geometry cycle:                            0
    Max. number expansion vectors:                   5


 =====================
 S C F   U P D A T E S
 =====================
  
 Max. nr. of cycles:                             10000
 Convergence criterion:                              0.0000000100
   secondary criterion:                              0.0000010000

 Mix parameter (when DIIS does not apply):           0.2000000000
 Mixed ADIIS+DIIS will be used
    Max number of expansion vectors:                10
    Pure ADIIS when Max([F,P]) is above              0.1000000000
    Pure DIIS when Max([F,P]) is below               0.0010000000
 Automatic ElectronSmearing (in case of problematic SCF convergence) disabled


 =================
 P R E C I S I O N  ***  (General: NumInt, NeglectFunctionTails, ...)  ***
 =================
  

 NumInt:           Target precision:                 6.0000000000
 -------           Initial precision:                6.0000000000
                   Min. precision (optimization):    6.0000000000

 Neglect Functions:          Basis functions:        0.1000000000E-15
 ------------------          Fit functions:          0.1000000000E-15


 ===========================
 L I N E A R   S C A L I N G
 ===========================
  

 Cut-off radii density fit:                        0.1000000000E-09
 Overlap cut-off criterion AO matrix elements:     0.1000000000E-07
 Cut-offs for Coulomb potential and fitted density:0.1000000000E-09
 Cut-off criterion for Coulomb multipole terms:    0.1000000000E-09
 Progressive Convergence parameter:                 0.000000000    
1
 ***************************************************************************************************


                                            ***************************
                                            *  C O M P U T A T I O N  *
                                            ***************************
  

 Number of elements of the density matrix on this node (used, total):      4395     61425


 ===========================================
 Numerical Integration : Fuzzy Cells (Becke)
 ===========================================
  
 Becke grid quality: GOOD           
  
 Lebedev angular grid order:             min:  11 max:  31
 Nr. of radial points:                   min:  54 max:  72

 Total nr. of points:     191081
 Nr. of blocks:             1493
 Block length:               128
 Nr. of dummy points:         23


 Test of Precision of the Numerical Integration Grid
 ===================================================

 Integral of the Total Core Density:                   0.00000000000000


 ========================
 Density Fitting (zlmFit)
 ========================
  
 ZlmFit Fit Quality: GOOD           
  
 Max L-expansion:                        min:   8 max:   9
 Nr. of radial interpolation points:     min:  78 max: 108


 =====
 S C F  ***  ScaSCF  ***
 =====
  
 Initial density matrix is calculated as sum of fragments

 CYCLE    1
 SCF Error: norm([F,P])=      7.641443260519, max([F,P])=      0.563253583544
 ***** SPIN 1 *****
 orbitals (Q,E):
 ---------------
 A :28...47          ( 1.00    -0.5336)  ( 1.00    -0.5291)  ( 1.00    -0.5110)  ( 1.00    -0.4875)
                     ( 1.00    -0.4651)  ( 1.00    -0.4338)  ( 1.00    -0.4051)  ( 1.00    -0.3817)
                     ( 1.00    -0.3254)  ( 1.00    -0.3051)  ( 0.00    -0.1996)  ( 0.00    -0.1609)
                     ( 0.00    -0.0786)  ( 0.00    -0.0699)  ( 0.00    -0.0556)  ( 0.00    -0.0464)
                     ( 0.00    -0.0201)  ( 0.00    -0.0142)  ( 0.00    -0.0095)  ( 0.00    -0.0002)
 ***** SPIN 2 *****
 orbitals (Q,E):
 ---------------
 A :28...47          ( 1.00    -0.5336)  ( 1.00    -0.5291)  ( 1.00    -0.5110)  ( 1.00    -0.4875)
                     ( 1.00    -0.4651)  ( 1.00    -0.4338)  ( 1.00    -0.4051)  ( 1.00    -0.3817)
                     ( 1.00    -0.3254)  ( 1.00    -0.3051)  ( 0.00    -0.1996)  ( 0.00    -0.1609)
                     ( 0.00    -0.0786)  ( 0.00    -0.0699)  ( 0.00    -0.0556)  ( 0.00    -0.0464)
                     ( 0.00    -0.0201)  ( 0.00    -0.0142)  ( 0.00    -0.0095)  ( 0.00    -0.0002)
  
 Spin polar: 0 (Spin_A minus Spin_B electrons)

 CYCLE    2
   MIX coefficients:  0.8000  0.2000
 SCF Error: norm([F,P])=      1.221841455615, max([F,P])=      0.109682112867
 ***** SPIN 1 *****
 orbitals (Q,E):
 ---------------
 A :28...38          ( 1.00    -0.4695)  ( 1.00    -0.4638)  ( 1.00    -0.4453)  ( 1.00    -0.4376)
                     ( 1.00    -0.4285)  ( 1.00    -0.3826)  ( 1.00    -0.3186)  ( 1.00    -0.3181)
                     ( 1.00    -0.2811)  ( 1.00    -0.2810)  ( 0.00    -0.1471)
 ***** SPIN 2 *****
 orbitals (Q,E):
 ---------------
 A :28...38          ( 1.00    -0.4695)  ( 1.00    -0.4638)  ( 1.00    -0.4453)  ( 1.00    -0.4376)
                     ( 1.00    -0.4285)  ( 1.00    -0.3826)  ( 1.00    -0.3186)  ( 1.00    -0.3181)
                     ( 1.00    -0.2811)  ( 1.00    -0.2810)  ( 0.00    -0.1471)
  
 Spin polar: 0 (Spin_A minus Spin_B electrons)

 CYCLE    3
  SDIIS (wt  0.000): -0.7217  1.7217
 A-DIIS (wt  1.000):  0.0000  1.0000
  DIIS coefficients:  0.0000  1.0000
 SCF Error: norm([F,P])=      0.593541936178, max([F,P])=      0.043928643967
 ***** SPIN 1 *****
 orbitals (Q,E):
 ---------------
 A :28...38          ( 1.00    -0.3084)  ( 1.00    -0.2877)  ( 1.00    -0.2836)  ( 1.00    -0.2701)
                     ( 1.00    -0.2497)  ( 1.00    -0.2495)  ( 1.00    -0.1837)  ( 1.00    -0.1756)
                     ( 1.00    -0.1424)  ( 1.00    -0.1187)  ( 0.00    -0.0306)
 ***** SPIN 2 *****
 orbitals (Q,E):
 ---------------
 A :28...38          ( 1.00    -0.3084)  ( 1.00    -0.2877)  ( 1.00    -0.2836)  ( 1.00    -0.2701)
                     ( 1.00    -0.2497)  ( 1.00    -0.2495)  ( 1.00    -0.1837)  ( 1.00    -0.1756)
                     ( 1.00    -0.1424)  ( 1.00    -0.1187)  ( 0.00    -0.0306)
  
 Spin polar: 0 (Spin_A minus Spin_B electrons)

 CYCLE    4
  SDIIS (wt  0.000):  0.3414  0.1401  0.5184
 A-DIIS (wt  1.000):  0.0000  0.6924  0.3076
  DIIS coefficients:  0.0000  0.6924  0.3076
 SCF Error: norm([F,P])=      0.960051025593, max([F,P])=      0.093373456425
 ***** SPIN 1 *****
 orbitals (Q,E):
 ---------------
 A :28...38          ( 1.00    -0.3671)  ( 1.00    -0.3512)  ( 1.00    -0.3504)  ( 1.00    -0.3386)
                     ( 1.00    -0.3238)  ( 1.00    -0.2971)  ( 1.00    -0.2368)  ( 1.00    -0.2254)
                     ( 1.00    -0.1932)  ( 1.00    -0.1875)  ( 0.00    -0.0679)
 ***** SPIN 2 *****
 orbitals (Q,E):
 ---------------
 A :28...38          ( 1.00    -0.3671)  ( 1.00    -0.3512)  ( 1.00    -0.3504)  ( 1.00    -0.3386)
                     ( 1.00    -0.3238)  ( 1.00    -0.2971)  ( 1.00    -0.2368)  ( 1.00    -0.2254)
                     ( 1.00    -0.1932)  ( 1.00    -0.1875)  ( 0.00    -0.0679)
  
 Spin polar: 0 (Spin_A minus Spin_B electrons)

 CYCLE    5
  SDIIS (wt  0.848): -0.0578  0.4316  0.1494  0.4768
 A-DIIS (wt  0.152):  0.0000  0.0000  0.0000  1.0000
  DIIS coefficients: -0.0490  0.3662  0.1268  0.5561
 SCF Error: norm([F,P])=      0.217794434341, max([F,P])=      0.016009862011
 ***** SPIN 1 *****
 orbitals (Q,E):
 ---------------
 A :28...38          ( 1.00    -0.3807)  ( 1.00    -0.3670)  ( 1.00    -0.3648)  ( 1.00    -0.3600)
                     ( 1.00    -0.3400)  ( 1.00    -0.3184)  ( 1.00    -0.2447)  ( 1.00    -0.2281)
                     ( 1.00    -0.2163)  ( 1.00    -0.2058)  ( 0.00    -0.0852)
 ***** SPIN 2 *****
 orbitals (Q,E):
 ---------------
 A :28...38          ( 1.00    -0.3807)  ( 1.00    -0.3670)  ( 1.00    -0.3648)  ( 1.00    -0.3600)
                     ( 1.00    -0.3400)  ( 1.00    -0.3184)  ( 1.00    -0.2447)  ( 1.00    -0.2281)
                     ( 1.00    -0.2163)  ( 1.00    -0.2058)  ( 0.00    -0.0852)
  
 Spin polar: 0 (Spin_A minus Spin_B electrons)

 CYCLE    6
  SDIIS (wt  0.848): -0.0817  0.2611  0.0134  0.4431  0.3640
 A-DIIS (wt  0.152):  0.0000  0.0000  0.0000  0.3634  0.6366
  DIIS coefficients: -0.0693  0.2215  0.0114  0.4310  0.4053
 SCF Error: norm([F,P])=      0.163451140883, max([F,P])=      0.016892722526
 ***** SPIN 1 *****
 orbitals (Q,E):
 ---------------
 A :28...38          ( 1.00    -0.3799)  ( 1.00    -0.3711)  ( 1.00    -0.3610)  ( 1.00    -0.3586)
                     ( 1.00    -0.3402)  ( 1.00    -0.3111)  ( 1.00    -0.2467)  ( 1.00    -0.2317)
                     ( 1.00    -0.2113)  ( 1.00    -0.2099)  ( 0.00    -0.0799)
 ***** SPIN 2 *****
 orbitals (Q,E):
 ---------------
 A :28...38          ( 1.00    -0.3799)  ( 1.00    -0.3711)  ( 1.00    -0.3610)  ( 1.00    -0.3586)
                     ( 1.00    -0.3402)  ( 1.00    -0.3111)  ( 1.00    -0.2467)  ( 1.00    -0.2317)
                     ( 1.00    -0.2113)  ( 1.00    -0.2099)  ( 0.00    -0.0799)
  
 Spin polar: 0 (Spin_A minus Spin_B electrons)

 CYCLE    7
  SDIIS (wt  0.958): -0.0202  0.0965  0.0094  0.2534  0.3089  0.3519
 A-DIIS (wt  0.042):  0.0000  0.0000  0.0000  0.0000  0.1719  0.8281
  DIIS coefficients: -0.0194  0.0925  0.0090  0.2428  0.3032  0.3719
 SCF Error: norm([F,P])=      0.066048998905, max([F,P])=      0.005153021419
 ***** SPIN 1 *****
 orbitals (Q,E):
 ---------------
 A :28...38          ( 1.00    -0.3785)  ( 1.00    -0.3696)  ( 1.00    -0.3604)  ( 1.00    -0.3599)
                     ( 1.00    -0.3403)  ( 1.00    -0.3128)  ( 1.00    -0.2461)  ( 1.00    -0.2296)
                     ( 1.00    -0.2107)  ( 1.00    -0.2083)  ( 0.00    -0.0811)
 ***** SPIN 2 *****
 orbitals (Q,E):
 ---------------
 A :28...38          ( 1.00    -0.3785)  ( 1.00    -0.3696)  ( 1.00    -0.3604)  ( 1.00    -0.3599)
                     ( 1.00    -0.3403)  ( 1.00    -0.3128)  ( 1.00    -0.2461)  ( 1.00    -0.2296)
                     ( 1.00    -0.2107)  ( 1.00    -0.2083)  ( 0.00    -0.0811)
  
 Spin polar: 0 (Spin_A minus Spin_B electrons)

 CYCLE    8
  SDIIS (wt  1.000): -0.0029  0.0257  0.0026  0.0938  0.1352  0.2339  0.5117
  DIIS coefficients: -0.0029  0.0257  0.0026  0.0938  0.1352  0.2339  0.5117
 SCF Error: norm([F,P])=      0.013515615201, max([F,P])=      0.000943959754
 ***** SPIN 1 *****
 orbitals (Q,E):
 ---------------
 A :28...38          ( 1.00    -0.3786)  ( 1.00    -0.3696)  ( 1.00    -0.3605)  ( 1.00    -0.3592)
                     ( 1.00    -0.3406)  ( 1.00    -0.3124)  ( 1.00    -0.2458)  ( 1.00    -0.2293)
                     ( 1.00    -0.2104)  ( 1.00    -0.2083)  ( 0.00    -0.0807)
 ***** SPIN 2 *****
 orbitals (Q,E):
 ---------------
 A :28...38          ( 1.00    -0.3786)  ( 1.00    -0.3696)  ( 1.00    -0.3605)  ( 1.00    -0.3592)
                     ( 1.00    -0.3406)  ( 1.00    -0.3124)  ( 1.00    -0.2458)  ( 1.00    -0.2293)
                     ( 1.00    -0.2104)  ( 1.00    -0.2083)  ( 0.00    -0.0807)
  
 Spin polar: 0 (Spin_A minus Spin_B electrons)

 CYCLE    9
  SDIIS (wt  1.000): -0.0002  0.0069  0.0007  0.0320  0.0497  0.0992  0.2986  0.5132
  DIIS coefficients: -0.0002  0.0069  0.0007  0.0320  0.0497  0.0992  0.2986  0.5132
 SCF Error: norm([F,P])=      0.003287930469, max([F,P])=      0.000188987043
 ***** SPIN 1 *****
 orbitals (Q,E):
 ---------------
 A :28...38          ( 1.00    -0.3787)  ( 1.00    -0.3697)  ( 1.00    -0.3606)  ( 1.00    -0.3594)
                     ( 1.00    -0.3405)  ( 1.00    -0.3125)  ( 1.00    -0.2459)  ( 1.00    -0.2295)
                     ( 1.00    -0.2105)  ( 1.00    -0.2085)  ( 0.00    -0.0807)
 ***** SPIN 2 *****
 orbitals (Q,E):
 ---------------
 A :28...38          ( 1.00    -0.3787)  ( 1.00    -0.3697)  ( 1.00    -0.3606)  ( 1.00    -0.3594)
                     ( 1.00    -0.3405)  ( 1.00    -0.3125)  ( 1.00    -0.2459)  ( 1.00    -0.2295)
                     ( 1.00    -0.2105)  ( 1.00    -0.2085)  ( 0.00    -0.0807)
  
 Spin polar: 0 (Spin_A minus Spin_B electrons)

 CYCLE   10
  SDIIS (wt  1.000): -0.0006  0.0031 -0.0003  0.0125  0.0196  0.0405  0.1464  0.3177  0.4611
  DIIS coefficients: -0.0006  0.0031 -0.0003  0.0125  0.0196  0.0405  0.1464  0.3177  0.4611
 SCF Error: norm([F,P])=      0.001144612737, max([F,P])=      0.000120914095
 ***** SPIN 1 *****
 orbitals (Q,E):
 ---------------
 A :28...38          ( 1.00    -0.3786)  ( 1.00    -0.3697)  ( 1.00    -0.3606)  ( 1.00    -0.3594)
                     ( 1.00    -0.3405)  ( 1.00    -0.3125)  ( 1.00    -0.2459)  ( 1.00    -0.2295)
                     ( 1.00    -0.2105)  ( 1.00    -0.2085)  ( 0.00    -0.0807)
 ***** SPIN 2 *****
 orbitals (Q,E):
 ---------------
 A :28...38          ( 1.00    -0.3786)  ( 1.00    -0.3697)  ( 1.00    -0.3606)  ( 1.00    -0.3594)
                     ( 1.00    -0.3405)  ( 1.00    -0.3125)  ( 1.00    -0.2459)  ( 1.00    -0.2295)
                     ( 1.00    -0.2105)  ( 1.00    -0.2085)  ( 0.00    -0.0807)
  
 Spin polar: 0 (Spin_A minus Spin_B electrons)

 CYCLE   11
  SDIIS (wt  1.000): -0.0003  0.0013 -0.0002  0.0048  0.0073  0.0152  0.0612  0.1459  0.2935  0.4713
  DIIS coefficients: -0.0003  0.0013 -0.0002  0.0048  0.0073  0.0152  0.0612  0.1459  0.2935  0.4713
 SCF Error: norm([F,P])=      0.000359880319, max([F,P])=      0.000044903162
 ***** SPIN 1 *****
 orbitals (Q,E):
 ---------------
 A :28...38          ( 1.00    -0.3787)  ( 1.00    -0.3697)  ( 1.00    -0.3606)  ( 1.00    -0.3594)
                     ( 1.00    -0.3405)  ( 1.00    -0.3125)  ( 1.00    -0.2459)  ( 1.00    -0.2295)
                     ( 1.00    -0.2105)  ( 1.00    -0.2085)  ( 0.00    -0.0808)
 ***** SPIN 2 *****
 orbitals (Q,E):
 ---------------
 A :28...38          ( 1.00    -0.3787)  ( 1.00    -0.3697)  ( 1.00    -0.3606)  ( 1.00    -0.3594)
                     ( 1.00    -0.3405)  ( 1.00    -0.3125)  ( 1.00    -0.2459)  ( 1.00    -0.2295)
                     ( 1.00    -0.2105)  ( 1.00    -0.2085)  ( 0.00    -0.0808)
  
 Spin polar: 0 (Spin_A minus Spin_B electrons)

 CYCLE   12
  SDIIS (wt  1.000):  0.0001 -0.0000  0.0009  0.0014  0.0032  0.0160  0.0442  0.1276  0.3710  0.4356
  DIIS coefficients:  0.0001 -0.0000  0.0009  0.0014  0.0032  0.0160  0.0442  0.1276  0.3710  0.4356
 SCF Error: norm([F,P])=      0.000212214994, max([F,P])=      0.000014839212
 ***** SPIN 1 *****
 orbitals (Q,E):
 ---------------
 A :28...38          ( 1.00    -0.3787)  ( 1.00    -0.3697)  ( 1.00    -0.3606)  ( 1.00    -0.3594)
                     ( 1.00    -0.3405)  ( 1.00    -0.3125)  ( 1.00    -0.2459)  ( 1.00    -0.2295)
                     ( 1.00    -0.2105)  ( 1.00    -0.2085)  ( 0.00    -0.0807)
 ***** SPIN 2 *****
 orbitals (Q,E):
 ---------------
 A :28...38          ( 1.00    -0.3787)  ( 1.00    -0.3697)  ( 1.00    -0.3606)  ( 1.00    -0.3594)
                     ( 1.00    -0.3405)  ( 1.00    -0.3125)  ( 1.00    -0.2459)  ( 1.00    -0.2295)
                     ( 1.00    -0.2105)  ( 1.00    -0.2085)  ( 0.00    -0.0807)
  
 Spin polar: 0 (Spin_A minus Spin_B electrons)

 CYCLE   13
  SDIIS (wt  1.000): -0.0000  0.0001  0.0002  0.0006  0.0044  0.0151  0.0563  0.1891  0.2508  0.4835
  DIIS coefficients: -0.0000  0.0001  0.0002  0.0006  0.0044  0.0151  0.0563  0.1891  0.2508  0.4835
 SCF Error: norm([F,P])=      0.000044139090, max([F,P])=      0.000003513100
 ***** SPIN 1 *****
 orbitals (Q,E):
 ---------------
 A :28...38          ( 1.00    -0.3787)  ( 1.00    -0.3697)  ( 1.00    -0.3606)  ( 1.00    -0.3594)
                     ( 1.00    -0.3405)  ( 1.00    -0.3125)  ( 1.00    -0.2459)  ( 1.00    -0.2295)
                     ( 1.00    -0.2105)  ( 1.00    -0.2085)  ( 0.00    -0.0808)
 ***** SPIN 2 *****
 orbitals (Q,E):
 ---------------
 A :28...38          ( 1.00    -0.3787)  ( 1.00    -0.3697)  ( 1.00    -0.3606)  ( 1.00    -0.3594)
                     ( 1.00    -0.3405)  ( 1.00    -0.3125)  ( 1.00    -0.2459)  ( 1.00    -0.2295)
                     ( 1.00    -0.2105)  ( 1.00    -0.2085)  ( 0.00    -0.0808)
  
 Spin polar: 0 (Spin_A minus Spin_B electrons)

 CYCLE   14
  SDIIS (wt  1.000): -0.0000 -0.0000  0.0001  0.0005  0.0025  0.0144  0.0631  0.0944  0.3444  0.4807
  DIIS coefficients: -0.0000 -0.0000  0.0001  0.0005  0.0025  0.0144  0.0631  0.0944  0.3444  0.4807
 SCF Error: norm([F,P])=      0.000022264274, max([F,P])=      0.000002005793
 ***** SPIN 1 *****
 orbitals (Q,E):
 ---------------
 A :28...38          ( 1.00    -0.3787)  ( 1.00    -0.3697)  ( 1.00    -0.3606)  ( 1.00    -0.3594)
                     ( 1.00    -0.3405)  ( 1.00    -0.3125)  ( 1.00    -0.2459)  ( 1.00    -0.2295)
                     ( 1.00    -0.2105)  ( 1.00    -0.2085)  ( 0.00    -0.0808)
 ***** SPIN 2 *****
 orbitals (Q,E):
 ---------------
 A :28...38          ( 1.00    -0.3787)  ( 1.00    -0.3697)  ( 1.00    -0.3606)  ( 1.00    -0.3594)
                     ( 1.00    -0.3405)  ( 1.00    -0.3125)  ( 1.00    -0.2459)  ( 1.00    -0.2295)
                     ( 1.00    -0.2105)  ( 1.00    -0.2085)  ( 0.00    -0.0808)
  
 Spin polar: 0 (Spin_A minus Spin_B electrons)

 CYCLE   15
  SDIIS (wt  1.000):  0.0000  0.0001  0.0002  0.0011  0.0053  0.0233  0.0335  0.1418  0.2346  0.5601
  DIIS coefficients:  0.0000  0.0001  0.0002  0.0011  0.0053  0.0233  0.0335  0.1418  0.2346  0.5601
 SCF Error: norm([F,P])=      0.000003400898, max([F,P])=      0.000000294449
 ***** SPIN 1 *****
 orbitals (Q,E):
 ---------------
 A :28...38          ( 1.00    -0.3787)  ( 1.00    -0.3697)  ( 1.00    -0.3606)  ( 1.00    -0.3594)
                     ( 1.00    -0.3405)  ( 1.00    -0.3125)  ( 1.00    -0.2459)  ( 1.00    -0.2295)
                     ( 1.00    -0.2105)  ( 1.00    -0.2085)  ( 0.00    -0.0808)
 ***** SPIN 2 *****
 orbitals (Q,E):
 ---------------
 A :28...38          ( 1.00    -0.3787)  ( 1.00    -0.3697)  ( 1.00    -0.3606)  ( 1.00    -0.3594)
                     ( 1.00    -0.3405)  ( 1.00    -0.3125)  ( 1.00    -0.2459)  ( 1.00    -0.2295)
                     ( 1.00    -0.2105)  ( 1.00    -0.2085)  ( 0.00    -0.0808)
  
 Spin polar: 0 (Spin_A minus Spin_B electrons)

 CYCLE   16
  SDIIS (wt  1.000):  0.0000  0.0001  0.0005  0.0024  0.0101  0.0141  0.0605  0.1017  0.2891  0.5215
  DIIS coefficients:  0.0000  0.0001  0.0005  0.0024  0.0101  0.0141  0.0605  0.1017  0.2891  0.5215
 SCF Error: norm([F,P])=      0.000000873131, max([F,P])=      0.000000047348
 ***** SPIN 1 *****
 orbitals (Q,E):
 ---------------
 A :28...38          ( 1.00    -0.3787)  ( 1.00    -0.3697)  ( 1.00    -0.3606)  ( 1.00    -0.3594)
                     ( 1.00    -0.3405)  ( 1.00    -0.3125)  ( 1.00    -0.2459)  ( 1.00    -0.2295)
                     ( 1.00    -0.2105)  ( 1.00    -0.2085)  ( 0.00    -0.0808)
 ***** SPIN 2 *****
 orbitals (Q,E):
 ---------------
 A :28...38          ( 1.00    -0.3787)  ( 1.00    -0.3697)  ( 1.00    -0.3606)  ( 1.00    -0.3594)
                     ( 1.00    -0.3405)  ( 1.00    -0.3125)  ( 1.00    -0.2459)  ( 1.00    -0.2295)
                     ( 1.00    -0.2105)  ( 1.00    -0.2085)  ( 0.00    -0.0808)
  
 Spin polar: 0 (Spin_A minus Spin_B electrons)

 CYCLE   17
  SDIIS (wt  1.000): -0.0000 -0.0000 -0.0001 -0.0001 -0.0002  0.0032  0.0091  0.0608  0.3020  0.6253
  DIIS coefficients: -0.0000 -0.0000 -0.0001 -0.0001 -0.0002  0.0032  0.0091  0.0608  0.3020  0.6253
 SCF Error: norm([F,P])=      0.000000376420, max([F,P])=      0.000000030941
 ***** SPIN 1 *****
 orbitals (Q,E):
 ---------------
 A :28...38          ( 1.00    -0.3787)  ( 1.00    -0.3697)  ( 1.00    -0.3606)  ( 1.00    -0.3594)
                     ( 1.00    -0.3405)  ( 1.00    -0.3125)  ( 1.00    -0.2459)  ( 1.00    -0.2295)
                     ( 1.00    -0.2105)  ( 1.00    -0.2085)  ( 0.00    -0.0808)
 ***** SPIN 2 *****
 orbitals (Q,E):
 ---------------
 A :28...38          ( 1.00    -0.3787)  ( 1.00    -0.3697)  ( 1.00    -0.3606)  ( 1.00    -0.3594)
                     ( 1.00    -0.3405)  ( 1.00    -0.3125)  ( 1.00    -0.2459)  ( 1.00    -0.2295)
                     ( 1.00    -0.2105)  ( 1.00    -0.2085)  ( 0.00    -0.0808)
  
 Spin polar: 0 (Spin_A minus Spin_B electrons)

 CYCLE   18
  SDIIS (wt  1.000):  0.0000  0.0001  0.0005  0.0007  0.0039  0.0077  0.0376  0.1789  0.4026  0.3679
  DIIS coefficients:  0.0000  0.0001  0.0005  0.0007  0.0039  0.0077  0.0376  0.1789  0.4026  0.3679
 SCF Error: norm([F,P])=      0.000000274359, max([F,P])=      0.000000029507
 ***** SPIN 1 *****
 orbitals (Q,E):
 ---------------
 A :28...38          ( 1.00    -0.3787)  ( 1.00    -0.3697)  ( 1.00    -0.3606)  ( 1.00    -0.3594)
                     ( 1.00    -0.3405)  ( 1.00    -0.3125)  ( 1.00    -0.2459)  ( 1.00    -0.2295)
                     ( 1.00    -0.2105)  ( 1.00    -0.2085)  ( 0.00    -0.0808)
 ***** SPIN 2 *****
 orbitals (Q,E):
 ---------------
 A :28...38          ( 1.00    -0.3787)  ( 1.00    -0.3697)  ( 1.00    -0.3606)  ( 1.00    -0.3594)
                     ( 1.00    -0.3405)  ( 1.00    -0.3125)  ( 1.00    -0.2459)  ( 1.00    -0.2295)
                     ( 1.00    -0.2105)  ( 1.00    -0.2085)  ( 0.00    -0.0808)
  
 Spin polar: 0 (Spin_A minus Spin_B electrons)

 CYCLE   19
  SDIIS (wt  1.000):  0.0000  0.0001  0.0001  0.0005  0.0012  0.0065  0.0301  0.0845  0.0918  0.7851
  DIIS coefficients:  0.0000  0.0001  0.0001  0.0005  0.0012  0.0065  0.0301  0.0845  0.0918  0.7851
 SCF Error: norm([F,P])=      0.000000017321, max([F,P])=      0.000000001012
 ***** SPIN 1 *****
 orbitals (Q,E):
 ---------------
 A :28...38          ( 1.00    -0.3787)  ( 1.00    -0.3697)  ( 1.00    -0.3606)  ( 1.00    -0.3594)
                     ( 1.00    -0.3405)  ( 1.00    -0.3125)  ( 1.00    -0.2459)  ( 1.00    -0.2295)
                     ( 1.00    -0.2105)  ( 1.00    -0.2085)  ( 0.00    -0.0808)
 ***** SPIN 2 *****
 orbitals (Q,E):
 ---------------
 A :28...38          ( 1.00    -0.3787)  ( 1.00    -0.3697)  ( 1.00    -0.3606)  ( 1.00    -0.3594)
                     ( 1.00    -0.3405)  ( 1.00    -0.3125)  ( 1.00    -0.2459)  ( 1.00    -0.2295)
                     ( 1.00    -0.2105)  ( 1.00    -0.2085)  ( 0.00    -0.0808)
  
 Spin polar: 0 (Spin_A minus Spin_B electrons)

 SCF CONVERGED

 CYCLE   20
 *** Setting up for NEW gradients in Focky
 *** Using FIT density in Focky
 ***** SPIN 1 *****
 orbitals (Q,E):
 ---------------
 A :28...47          ( 1.00    -0.3787)  ( 1.00    -0.3697)  ( 1.00    -0.3606)  ( 1.00    -0.3594)
                     ( 1.00    -0.3405)  ( 1.00    -0.3125)  ( 1.00    -0.2459)  ( 1.00    -0.2295)
                     ( 1.00    -0.2105)  ( 1.00    -0.2085)  ( 0.00    -0.0808)  ( 0.00    -0.0666)
                     ( 0.00    -0.0296)  ( 0.00    -0.0030)  ( 0.00     0.0056)  ( 0.00     0.0376)
                     ( 0.00     0.0404)  ( 0.00     0.0617)  ( 0.00     0.0701)  ( 0.00     0.0704)
 ***** SPIN 2 *****
 orbitals (Q,E):
 ---------------
 A :28...47          ( 1.00    -0.3787)  ( 1.00    -0.3697)  ( 1.00    -0.3606)  ( 1.00    -0.3594)
                     ( 1.00    -0.3405)  ( 1.00    -0.3125)  ( 1.00    -0.2459)  ( 1.00    -0.2295)
                     ( 1.00    -0.2105)  ( 1.00    -0.2085)  ( 0.00    -0.0808)  ( 0.00    -0.0666)
                     ( 0.00    -0.0296)  ( 0.00    -0.0030)  ( 0.00     0.0056)  ( 0.00     0.0376)
                     ( 0.00     0.0404)  ( 0.00     0.0617)  ( 0.00     0.0701)  ( 0.00     0.0704)
  
 Spin polar: 0 (Spin_A minus Spin_B electrons)


 Fit test: (difference of exact and fit density, squared integrated, result summed over spins)
         SCF:                                          0.00001687083715

 Gross Charges per Atom (Z minus electrons)
 ==========================================
            -0.1459    0.0022   -0.0571   -0.1023   -0.5604   -0.0054    0.5702   -0.0953    0.4028    0.2152
             0.5324   -0.1767   -0.1459   -0.2110   -0.2227
 Net Total: -0.00000000


 =================================================================
 M U L T I P O L E   D E R I V E D   C H A R G E   A N A L Y S I S
 =================================================================

 See: M. Swart, P.Th. van Duijnen, J.G. Snijders, J.Comput.Chem., (2001), p. 79-88.

 ----------------------------------------------------- 
 MDC atomic charges (includes spinA + spinB electrons)
 ----------------------------------------------------- 

        Atom    Level:     MDC-m        MDC-d        MDC-q
 ---------------------------------------------------------
     1     H           -0.050658    -0.024704     7.390171
     2     H            0.068508     0.144297    -4.526252
     3     N           -0.063981     0.002842   -19.575587
     4     N           -0.092330    -0.043126  -214.016494
     5     O           -0.412435    -0.522689     6.385010
     6     H            0.052574     0.117996    51.451656
     7     C            0.242255     0.355883    22.259200
     8     C           -0.004245    -0.001025  -116.967131
     9     C            0.135853     0.133707   261.800285
    10     C           -0.249132    -0.093043    71.172457
    11     C            0.219947     0.174163    -5.486920
    12     H           -0.037654     0.000349   -65.298482
    13     H           -0.050641    -0.024635     7.417260
    14     H           -0.062316    -0.053963    -1.641751
    15     S            0.304257    -0.166051    -0.363420

 -------------------------------- 
 MDC spin density (spinA - spinB)
 -------------------------------- 

        Atom    Level:     MDC-m        MDC-d        MDC-q
 ---------------------------------------------------------
     1     H           -0.000000    -0.000000     0.000000
     2     H            0.000000     0.000000    -0.000000
     3     N            0.000000     0.000000     0.000000
     4     N           -0.000000    -0.000000    -0.000000
     5     O           -0.000000    -0.000000     0.000000
     6     H           -0.000000    -0.000000    -0.000000
     7     C           -0.000000    -0.000000    -0.000000
     8     C            0.000000     0.000000    -0.000000
     9     C           -0.000000    -0.000000     0.000000
    10     C           -0.000000    -0.000000     0.000000
    11     C           -0.000000    -0.000000    -0.000000
    12     H            0.000000     0.000000    -0.000000
    13     H           -0.000000    -0.000000     0.000000
    14     H           -0.000000    -0.000000     0.000000
    15     S           -0.000000    -0.000000    -0.000000


 ==========
 S**2 value  ***  see also R. Bulo et al., J.Am.Chem.Soc., 124 (2002) 13903-13910, note (29)  ***
 ==========
  
                                       exact      expectation value

 Total S2 (S squared)                  0.00000            -0.00000


 =======================================
 OCCUPIED-VIRTUAL DIPOLE MATRIX ELEMENTS  ***  (numeric integrals)  ***
 =======================================
  

**************************************************************************
*                                                                        *
*        EXCITATION ENERGY CALCULATION, a part of the ADF-RESPONSE code  *
*                                                                        *
*        RESPONSE, extension of the ADF program for linear and nonlinear *
*        response calculations, by:                                      *
*        S.J.A. van Gisbergen, J.G. Snijders and E.J. Baerends,          *
*                   with contributions by:                               *
*        J.A. Groeneveld, F. Kootstra, and V.P. Osinga                   *
*              version of February 1999, in ADF99                        *
*                                                                        *
*        The most extensive description of the used algorithms is        *
*        given in: S.J.A. van Gisbergen, J.G. Snijders, E.J. Baerends    *
*                  Comp. Phys. Commun. 118 (1999) p.119-138              *
*        and in: S.J.A. van Gisbergen, Ph.D. thesis Amsterdam (1998)     *
*                                                                        *
**************************************************************************


**************************************************************************
*                                                                        *
*             Data for EXCITATION program part                           *
*                                                                        *
* Relevant references are:                                               *
*   S.J.A. van Gisbergen, J.G. Snijders, E.J. Baerends,                  *
*     Comput. Phys. Commun. 118, p.119 (1999)                            *
*   S.J.A. van Gisbergen, F. Kootstra, P.R.T. Schipper, O.V. Gritsenko,  *
*   J. G. Snijders, E.J. Baerends, Phys. Rev. A57 p.2556 (1998)          *
*                                                                        *
*   Ch. Jamorski, M.E. Casida, and D.R. Salahub                          *
*        J. Chem. Phys. 104, p.5134 (1996)                               *
*   R. Bauernschmitt and R. Ahlrichs Chem. Phys. Lett. 256, p.454 (1996) *
*                                                                        *
*   Maximum number of cycles in Davidson part, ndvcyc =              200 *
*                                                                        *
*   The exchange correlation kernel f_xc which is used, is               *
*   Adiabatic LDA, which is frequency-independent.                       *
*                                                                        *
*   Tails of functions are neglected                                     *
*         tailbas =    0.1000000000E-15                                  *
*         tailfit =    0.1000000000E-15                                  *
*   Dipole-allowed irreps are = A                                        *
*                               A                                        *
*                               A                                        *
*                                                                        *
*   Nr of excitation energies per irrep to be calculated                 *
*   Excitations calculated with the davidson method                      *
*       4 of    20054 excitations in irrep A    column   1               *
*                                                                        *
**************************************************************************

 The Clebsch-Gordan series for each direct product
                               A
                         -------
 A * A                        X


**************************************************************************
*****  STARTING CALCULATION OF SPIN-UNRESTRICTED EXCITATION ENERGIES  ******
**************************************************************************


Eigenvalues of small (approximate) problem
   i, eigenvalue(i) in dvdson     1    0.1214131961E+00
   i, eigenvalue(i) in dvdson     2    0.1256244955E+00
   i, eigenvalue(i) in dvdson     3    0.1308773643E+00
   i, eigenvalue(i) in dvdson     4    0.1861649289E+00
Eigenvalues of small (approximate) problem
   i, eigenvalue(i) in dvdson     1    0.1188334165E+00
   i, eigenvalue(i) in dvdson     2    0.1251418422E+00
   i, eigenvalue(i) in dvdson     3    0.1300434200E+00
   i, eigenvalue(i) in dvdson     4    0.1808785909E+00
Eigenvalues of small (approximate) problem
   i, eigenvalue(i) in dvdson     1    0.1187894978E+00
   i, eigenvalue(i) in dvdson     2    0.1251386671E+00
   i, eigenvalue(i) in dvdson     3    0.1300197599E+00
   i, eigenvalue(i) in dvdson     4    0.1594151654E+00
Eigenvalues of small (approximate) problem
   i, eigenvalue(i) in dvdson     1    0.1187871404E+00
   i, eigenvalue(i) in dvdson     2    0.1251385748E+00
   i, eigenvalue(i) in dvdson     3    0.1300189678E+00
   i, eigenvalue(i) in dvdson     4    0.1394277967E+00
Eigenvalues of small (approximate) problem
   i, eigenvalue(i) in dvdson     1    0.1187870494E+00
   i, eigenvalue(i) in dvdson     2    0.1251385739E+00
   i, eigenvalue(i) in dvdson     3    0.1300186449E+00
   i, eigenvalue(i) in dvdson     4    0.1375169807E+00
Eigenvalues of small (approximate) problem
   i, eigenvalue(i) in dvdson     1    0.1187870442E+00
   i, eigenvalue(i) in dvdson     2    0.1251385739E+00
   i, eigenvalue(i) in dvdson     3    0.1300186446E+00
   i, eigenvalue(i) in dvdson     4    0.1374860278E+00
Eigenvalues of small (approximate) problem
   i, eigenvalue(i) in dvdson     1    0.1187870440E+00
   i, eigenvalue(i) in dvdson     2    0.1251385739E+00
   i, eigenvalue(i) in dvdson     3    0.1300184084E+00
   i, eigenvalue(i) in dvdson     4    0.1353424370E+00
Eigenvalues of small (approximate) problem
   i, eigenvalue(i) in dvdson     1    0.1187870440E+00
   i, eigenvalue(i) in dvdson     2    0.1251385739E+00
   i, eigenvalue(i) in dvdson     3    0.1300184084E+00
   i, eigenvalue(i) in dvdson     4    0.1346899944E+00
Eigenvalues of small (approximate) problem
   i, eigenvalue(i) in dvdson     1    0.1187870440E+00
   i, eigenvalue(i) in dvdson     2    0.1251385739E+00
   i, eigenvalue(i) in dvdson     3    0.1300183880E+00
   i, eigenvalue(i) in dvdson     4    0.1346663935E+00
Eigenvalues of small (approximate) problem
   i, eigenvalue(i) in dvdson     1    0.1187870440E+00
   i, eigenvalue(i) in dvdson     2    0.1251385739E+00
   i, eigenvalue(i) in dvdson     3    0.1300183870E+00
   i, eigenvalue(i) in dvdson     4    0.1346589150E+00
Eigenvalues of small (approximate) problem
   i, eigenvalue(i) in dvdson     1    0.1187870440E+00
   i, eigenvalue(i) in dvdson     2    0.1251385739E+00
   i, eigenvalue(i) in dvdson     3    0.1300183820E+00
   i, eigenvalue(i) in dvdson     4    0.1346584860E+00


**************************************************************************
*                                                                        *
*   Final excitation energies from Davidson algorithm                    *
*                                                                        *
**************************************************************************

    Number of loops in Davidson routine     =   11                    
    Number of matrix-vector multiplications =   35                    
    Type of excitations = SPIN-UNRESTRICTED                                 
                                                                          

 Symmetry A    

 Excitation energies E in a.u. and eV, dE wrt prev. cycle,
 oscillator strengths f in a.u.

 no.  E/a.u.        E/eV      f           dE/a.u.
 -----------------------------------------------------
   1 0.11879      3.2324     0.51001E-14  0.16E-13
   2 0.12514      3.4052     0.23231E-17  0.69E-17
   3 0.13002      3.5380     0.86212E-05  0.13E-08
   4 0.13466      3.6642     0.34781E-07  0.12E-06
 
                                                        
 Major MO -> MO transitions for the above excitations   
                                                        
    Excitation  Occupied to virtual  Contribution       

     Nr.          orbitals           weight        contributions to     
                                     (sum=1) transition dipole moment   
                                              x       y       z       


     1: Beta  36a     ->  38a        0.4924 -1.2278 -0.3509 -0.0521
     1: Alph  36a     ->  38a        0.4924  1.2278  0.3509  0.0521
     1: Alph  34a     ->  39a        0.0027  0.0932  0.0589  0.0087
     1: Beta  34a     ->  39a        0.0027 -0.0932 -0.0589 -0.0087
     1: Beta  33a     ->  38a        0.0013  0.0101 -0.0413 -0.0061
     1: Alph  33a     ->  38a        0.0013 -0.0101  0.0413  0.0061
     1: Alph  34a     ->  38a        0.0009  0.0048  0.0138  0.0020
     1: Beta  34a     ->  38a        0.0009 -0.0048 -0.0138 -0.0020
     1: Alph  36a     ->  44a        0.0007  0.0244  0.0008  0.0001
     1: Beta  36a     ->  44a        0.0007 -0.0244 -0.0008 -0.0001
     1: Alph  36a     ->  47a        0.0003  0.0049 -0.0009 -0.0001
     1: Beta  36a     ->  47a        0.0003 -0.0049  0.0009  0.0001
     1: Alph  33a     ->  39a        0.0003 -0.0061 -0.0044 -0.0007
     1: Beta  33a     ->  39a        0.0003  0.0061  0.0044  0.0007
     1: Beta  31a     ->  38a        0.0002  0.0062 -0.0175 -0.0025
     1: Alph  31a     ->  38a        0.0002 -0.0062  0.0175  0.0025
     1: Alph  33a     ->  44a        0.0001  0.0090  0.0016  0.0002
     1: Beta  33a     ->  44a        0.0001 -0.0090 -0.0016 -0.0002
     1: Beta  36a     ->  39a        0.0001  0.0108 -0.0132 -0.0019


     2: Beta  37a     ->  38a        0.4960  0.0049 -0.0012  0.0182
     2: Alph  37a     ->  38a        0.4960 -0.0049  0.0012 -0.0182
     2: Alph  35a     ->  39a        0.0020  0.0000  0.0002 -0.0014
     2: Beta  35a     ->  39a        0.0020 -0.0000 -0.0002  0.0014
     2: Beta  37a     ->  39a        0.0018  0.0002 -0.0001 -0.0006
     2: Alph  37a     ->  39a        0.0018 -0.0002  0.0001  0.0006


     3: Alph  37a     ->  38a        0.4963 -0.0048  0.0012 -0.0179
     3: Beta  37a     ->  38a        0.4963 -0.0048  0.0012 -0.0179
     3: Beta  35a     ->  39a        0.0020 -0.0000 -0.0002  0.0013
     3: Alph  35a     ->  39a        0.0020 -0.0000 -0.0002  0.0013
     3: Beta  37a     ->  39a        0.0014  0.0001 -0.0001 -0.0005


     4: Alph  36a     ->  39a        0.4808  0.6333 -0.7729 -0.1135
     4: Beta  36a     ->  39a        0.4802 -0.6330  0.7725  0.1135
     4: Beta  34a     ->  38a        0.0169  0.0199  0.0574  0.0084
     4: Alph  34a     ->  38a        0.0169 -0.0199 -0.0573 -0.0084
     4: Alph  33a     ->  39a        0.0007 -0.0086 -0.0062 -0.0009
     4: Beta  33a     ->  39a        0.0007  0.0086  0.0062  0.0009
     4: Alph  33a     ->  38a        0.0005  0.0061 -0.0250 -0.0037
     4: Beta  33a     ->  38a        0.0005 -0.0061  0.0250  0.0037
     4: Beta  36a     ->  44a        0.0003  0.0150  0.0005  0.0001
     4: Alph  36a     ->  44a        0.0003 -0.0150 -0.0005 -0.0001
     4: Beta  36a     ->  38a        0.0003 -0.0291 -0.0083 -0.0012
 

 All SPIN-UNRESTRICTED excitation energies 

 no.     E/a.u.        E/eV      f           Symmetry
 -----------------------------------------------------
   1:     0.11879      3.23236   0.5100E-14  A           
   2:     0.12514      3.40519   0.2323E-17  A           
   3:     0.13002      3.53798   0.8621E-05  A           
   4:     0.13466      3.66424   0.3478E-07  A           


 Normal termination of EXCITATION program part


 *** Using NEW gradient routines ***

 *** Calculating Gradients of Excitation Energy ***

 Relevent references:
    C. Van Caille and R. D. Amos, Chem. Phys. Lett. 308,249 (1999) and 317,159 (2000)
    F. Furche and R. Ahlrichs, J. Chem. Phys. 117,7433 (2002)
    M. Seth, G. Mazur,  T. Ziegler, Theor. Chem. Acc., 129, 331 (2011) 


   ---Begin solution of CPKS Equations--
   Real perturbation
Iter    5 Error   0.007909
  CPKS converged. Remaining residual is  0.0000502

 *** Finished Excitation Energy Gradients ***


 Geometry CYCLE 1
 ==============

 Energy gradients wrt nuclear displacements
 ==========================================

     Atom      Cartesian (a.u./angstrom)
                 X         Y         Z
 ----------------------------------------
     1 H     0.001804  0.002841 -0.013263
     2 H     0.003294 -0.028760 -0.004274
     3 N    -0.036553 -0.046364 -0.006852
     4 N     0.120464  0.039992  0.005995
     5 O     0.035486  0.051770  0.007650
     6 H     0.002769  0.030648  0.004450
     7 C     0.096524 -0.049612 -0.007392
     8 C     0.071062  0.152701  0.022560
     9 C    -0.155636 -0.147655 -0.021848
    10 C     0.409942 -0.103614 -0.015252
    11 C    -0.018652  0.002057  0.000209
    12 H    -0.016455 -0.006631 -0.001003
    13 H     0.001798 -0.001176  0.013683
    14 H    -0.008171  0.014964  0.002230
    15 S    -0.507677  0.088837  0.013107
 ----------------------------------------
 
----------------------------------------------------------------------
Geometry Convergence after Step   1       (Hartree/Angstrom,Angstrom)
----------------------------------------------------------------------
current energy                               -3.29557729 Hartree
energy change                      -3.29557729     0.00100000    F
constrained gradient max            0.50767692     0.00100000    F
constrained gradient rms            0.11144250     0.00066667    F
gradient max                        0.50767692
gradient rms                        0.11144250
cart. step max                      0.27836710     0.01000000    F
cart. step rms                      0.07090860     0.00666667    F
 


 Coordinates (Cartesian)
 =======================

     Atom                    bohr                                 angstrom                 Geometric Variables
                   X           Y           Z              X           Y           Z       (0:frozen, *:LT par.)
 --------------------------------------------------------------------------------------------------------------
     1 H      -5.175727    0.194659   -1.686161      -2.738877    0.103009   -0.892278      1       2       3
     2 H       2.588767   -4.383502   -0.639411       1.369916   -2.319649   -0.338361      4       5       6
     3 N       1.948212   -2.597841   -0.374728       1.030949   -1.374718   -0.198297      7       8       9
     4 N       2.821188    1.712737    0.264165       1.492908    0.906342    0.139790     10      11      12
     5 O      -2.173321   -4.100068   -0.603251      -1.150072   -2.169663   -0.319227     13      14      15
     6 H       4.114691    3.112470    0.472917       2.177401    1.647048    0.250257     16      17      18
     7 C      -0.688543   -2.262222   -0.327743      -0.364361   -1.197116   -0.173434     19      20      21
     8 C      -1.526631    0.334078    0.049189      -0.807858    0.176786    0.026030     22      23      24
     9 C       0.305028    2.353401    0.354104       0.161414    1.245366    0.187384     25      26      27
    10 C       3.842821   -0.700778   -0.095416       2.033533   -0.370836   -0.050492     28      29      30
    11 C      -4.298405    0.809786    0.101666      -2.274618    0.428520    0.053799     31      32      33
    12 H      -0.183103    4.327701    0.644959      -0.096894    2.290121    0.341298     34      35      36
    13 H      -5.197533   -0.291848    1.625555      -2.750416   -0.154439    0.860207     37      38      39
    14 H      -4.706419    2.825851    0.394803      -2.490530    1.495376    0.208921     40      41      42
    15 S       7.073183   -1.269383   -0.193488       3.742967   -0.671729   -0.102390     43      44      45
 --------------------------------------------------------------------------------------------------------------

 Number of elements of the density matrix on this node (used, total):      4395     61425


 ===========================================
 Numerical Integration : Fuzzy Cells (Becke)
 ===========================================
  
 Becke grid quality: GOOD           
  
 Lebedev angular grid order:             min:  11 max:  31
 Nr. of radial points:                   min:  54 max:  72

 Total nr. of points:     191055
 Nr. of blocks:             1493
 Block length:               128
 Nr. of dummy points:         49


 Test of Precision of the Numerical Integration Grid
 ===================================================

 Integral of the Total Core Density:                   0.00000000000000


 ========================
 Density Fitting (zlmFit)
 ========================
  
 ZlmFit Fit Quality: GOOD           
  
 Max L-expansion:                        min:   8 max:   9
 Nr. of radial interpolation points:     min:  78 max: 108


 =====
 S C F  ***  ScaSCF  ***
 =====
  
 Initial density matrix is taken from previous geometry

 CYCLE    1
 SCF Error: norm([F,P])=      1.269809522929, max([F,P])=      0.242147807709
 ***** SPIN 1 *****
 orbitals (Q,E):
 ---------------
 A :28...47          ( 1.00    -0.4106)  ( 1.00    -0.4065)  ( 1.00    -0.3929)  ( 1.00    -0.3896)
                     ( 1.00    -0.3686)  ( 1.00    -0.3445)  ( 1.00    -0.2896)  ( 1.00    -0.2818)
                     ( 1.00    -0.2567)  ( 1.00    -0.2533)  ( 0.00    -0.1507)  ( 0.00    -0.1205)
                     ( 0.00    -0.0645)  ( 0.00    -0.0417)  ( 0.00    -0.0260)  ( 0.00    -0.0195)
                     ( 0.00    -0.0025)  ( 0.00     0.0146)  ( 0.00     0.0376)  ( 0.00     0.0385)
 ***** SPIN 2 *****
 orbitals (Q,E):
 ---------------
 A :28...47          ( 1.00    -0.4106)  ( 1.00    -0.4065)  ( 1.00    -0.3929)  ( 1.00    -0.3896)
                     ( 1.00    -0.3686)  ( 1.00    -0.3445)  ( 1.00    -0.2896)  ( 1.00    -0.2818)
                     ( 1.00    -0.2567)  ( 1.00    -0.2533)  ( 0.00    -0.1507)  ( 0.00    -0.1205)
                     ( 0.00    -0.0645)  ( 0.00    -0.0417)  ( 0.00    -0.0260)  ( 0.00    -0.0195)
                     ( 0.00    -0.0025)  ( 0.00     0.0146)  ( 0.00     0.0376)  ( 0.00     0.0385)
  
 Spin polar: 0 (Spin_A minus Spin_B electrons)

 CYCLE    2
  SDIIS (wt  0.000):  0.0773  0.9227
 A-DIIS (wt  1.000):  0.0508  0.9492
  DIIS coefficients:  0.0508  0.9492
 SCF Error: norm([F,P])=      0.341555081963, max([F,P])=      0.028796788671
 ***** SPIN 1 *****
 orbitals (Q,E):
 ---------------
 A :28...38          ( 1.00    -0.4106)  ( 1.00    -0.4024)  ( 1.00    -0.3864)  ( 1.00    -0.3763)
                     ( 1.00    -0.3070)  ( 1.00    -0.2967)  ( 1.00    -0.2641)  ( 1.00    -0.2637)
                     ( 1.00    -0.1618)  ( 1.00    -0.1405)  ( 0.00    -0.1274)
 ***** SPIN 2 *****
 orbitals (Q,E):
 ---------------
 A :28...38          ( 1.00    -0.4106)  ( 1.00    -0.4024)  ( 1.00    -0.3864)  ( 1.00    -0.3763)
                     ( 1.00    -0.3070)  ( 1.00    -0.2967)  ( 1.00    -0.2641)  ( 1.00    -0.2637)
                     ( 1.00    -0.1618)  ( 1.00    -0.1405)  ( 0.00    -0.1274)
  
 Spin polar: 0 (Spin_A minus Spin_B electrons)

 CYCLE    3
  SDIIS (wt  0.000):  0.0112  0.6726  0.3162
 A-DIIS (wt  1.000):  0.0000  0.7441  0.2559
  DIIS coefficients:  0.0000  0.7441  0.2559
 SCF Error: norm([F,P])=      0.696065624835, max([F,P])=      0.056274403396
 ***** SPIN 1 *****
 orbitals (Q,E):
 ---------------
 A :28...38          ( 1.00    -0.3878)  ( 1.00    -0.3787)  ( 1.00    -0.3633)  ( 1.00    -0.3543)
                     ( 1.00    -0.3401)  ( 1.00    -0.2994)  ( 1.00    -0.2389)  ( 1.00    -0.2354)
                     ( 1.00    -0.1967)  ( 1.00    -0.1898)  ( 0.00    -0.1054)
 ***** SPIN 2 *****
 orbitals (Q,E):
 ---------------
 A :28...38          ( 1.00    -0.3878)  ( 1.00    -0.3787)  ( 1.00    -0.3633)  ( 1.00    -0.3543)
                     ( 1.00    -0.3401)  ( 1.00    -0.2994)  ( 1.00    -0.2389)  ( 1.00    -0.2354)
                     ( 1.00    -0.1967)  ( 1.00    -0.1898)  ( 0.00    -0.1054)
  
 Spin polar: 0 (Spin_A minus Spin_B electrons)

 CYCLE    4
  SDIIS (wt  0.838):  0.4370  0.0974  0.4656
 A-DIIS (wt  0.162):  0.2536  0.0000  0.7464
  DIIS coefficients:  0.4073  0.0816  0.5112
 SCF Error: norm([F,P])=      0.200666315809, max([F,P])=      0.017070742612
 ***** SPIN 1 *****
 orbitals (Q,E):
 ---------------
 A :28...38          ( 1.00    -0.3906)  ( 1.00    -0.3835)  ( 1.00    -0.3685)  ( 1.00    -0.3576)
                     ( 1.00    -0.3518)  ( 1.00    -0.3115)  ( 1.00    -0.2467)  ( 1.00    -0.2410)
                     ( 1.00    -0.2060)  ( 1.00    -0.1995)  ( 0.00    -0.1129)
 ***** SPIN 2 *****
 orbitals (Q,E):
 ---------------
 A :28...38          ( 1.00    -0.3906)  ( 1.00    -0.3835)  ( 1.00    -0.3685)  ( 1.00    -0.3576)
                     ( 1.00    -0.3518)  ( 1.00    -0.3115)  ( 1.00    -0.2467)  ( 1.00    -0.2410)
                     ( 1.00    -0.2060)  ( 1.00    -0.1995)  ( 0.00    -0.1129)
  
 Spin polar: 0 (Spin_A minus Spin_B electrons)

 CYCLE    5
  SDIIS (wt  0.838):  0.1979 -0.0178  0.4558  0.3640
 A-DIIS (wt  0.162):  0.0241  0.0000  0.3168  0.6591
  DIIS coefficients:  0.1697 -0.0149  0.4333  0.4119
 SCF Error: norm([F,P])=      0.124815411471, max([F,P])=      0.017964103117
 ***** SPIN 1 *****
 orbitals (Q,E):
 ---------------
 A :28...38          ( 1.00    -0.3864)  ( 1.00    -0.3802)  ( 1.00    -0.3641)  ( 1.00    -0.3588)
                     ( 1.00    -0.3503)  ( 1.00    -0.3073)  ( 1.00    -0.2445)  ( 1.00    -0.2391)
                     ( 1.00    -0.2104)  ( 1.00    -0.2085)  ( 0.00    -0.1097)
 ***** SPIN 2 *****
 orbitals (Q,E):
 ---------------
 A :28...38          ( 1.00    -0.3864)  ( 1.00    -0.3802)  ( 1.00    -0.3641)  ( 1.00    -0.3588)
                     ( 1.00    -0.3503)  ( 1.00    -0.3073)  ( 1.00    -0.2445)  ( 1.00    -0.2391)
                     ( 1.00    -0.2104)  ( 1.00    -0.2085)  ( 0.00    -0.1097)
  
 Spin polar: 0 (Spin_A minus Spin_B electrons)

 CYCLE    6
  SDIIS (wt  0.968):  0.1085 -0.0149  0.2929  0.3173  0.2962
 A-DIIS (wt  0.032):  0.0000  0.0000  0.0000  0.1773  0.8227
  DIIS coefficients:  0.1050 -0.0144  0.2834  0.3128  0.3132
 SCF Error: norm([F,P])=      0.051877794514, max([F,P])=      0.004184913345
 ***** SPIN 1 *****
 orbitals (Q,E):
 ---------------
 A :28...38          ( 1.00    -0.3871)  ( 1.00    -0.3809)  ( 1.00    -0.3654)  ( 1.00    -0.3580)
                     ( 1.00    -0.3505)  ( 1.00    -0.3080)  ( 1.00    -0.2443)  ( 1.00    -0.2375)
                     ( 1.00    -0.2094)  ( 1.00    -0.2060)  ( 0.00    -0.1104)
 ***** SPIN 2 *****
 orbitals (Q,E):
 ---------------
 A :28...38          ( 1.00    -0.3871)  ( 1.00    -0.3809)  ( 1.00    -0.3654)  ( 1.00    -0.3580)
                     ( 1.00    -0.3505)  ( 1.00    -0.3080)  ( 1.00    -0.2443)  ( 1.00    -0.2375)
                     ( 1.00    -0.2094)  ( 1.00    -0.2060)  ( 0.00    -0.1104)
  
 Spin polar: 0 (Spin_A minus Spin_B electrons)

 CYCLE    7
  SDIIS (wt  0.996):  0.0497 -0.0078  0.1422  0.1798  0.2475  0.3884
 A-DIIS (wt  0.004):  0.0000  0.0000  0.0000  0.0000  0.0405  0.9595
  DIIS coefficients:  0.0496 -0.0077  0.1417  0.1792  0.2467  0.3906
 SCF Error: norm([F,P])=      0.013458126691, max([F,P])=      0.001373281764
 ***** SPIN 1 *****
 orbitals (Q,E):
 ---------------
 A :28...38          ( 1.00    -0.3874)  ( 1.00    -0.3805)  ( 1.00    -0.3650)  ( 1.00    -0.3578)
                     ( 1.00    -0.3504)  ( 1.00    -0.3077)  ( 1.00    -0.2442)  ( 1.00    -0.2381)
                     ( 1.00    -0.2090)  ( 1.00    -0.2058)  ( 0.00    -0.1098)
 ***** SPIN 2 *****
 orbitals (Q,E):
 ---------------
 A :28...38          ( 1.00    -0.3874)  ( 1.00    -0.3805)  ( 1.00    -0.3650)  ( 1.00    -0.3578)
                     ( 1.00    -0.3504)  ( 1.00    -0.3077)  ( 1.00    -0.2442)  ( 1.00    -0.2381)
                     ( 1.00    -0.2090)  ( 1.00    -0.2058)  ( 0.00    -0.1098)
  
 Spin polar: 0 (Spin_A minus Spin_B electrons)

 CYCLE    8
  SDIIS (wt  1.000):  0.0210 -0.0038  0.0626  0.0871  0.1350  0.2859  0.4121
  DIIS coefficients:  0.0210 -0.0038  0.0626  0.0871  0.1350  0.2859  0.4121
 SCF Error: norm([F,P])=      0.004362490665, max([F,P])=      0.000400515148
 ***** SPIN 1 *****
 orbitals (Q,E):
 ---------------
 A :28...38          ( 1.00    -0.3872)  ( 1.00    -0.3805)  ( 1.00    -0.3650)  ( 1.00    -0.3578)
                     ( 1.00    -0.3503)  ( 1.00    -0.3077)  ( 1.00    -0.2441)  ( 1.00    -0.2378)
                     ( 1.00    -0.2090)  ( 1.00    -0.2057)  ( 0.00    -0.1099)
 ***** SPIN 2 *****
 orbitals (Q,E):
 ---------------
 A :28...38          ( 1.00    -0.3872)  ( 1.00    -0.3805)  ( 1.00    -0.3650)  ( 1.00    -0.3578)
                     ( 1.00    -0.3503)  ( 1.00    -0.3077)  ( 1.00    -0.2441)  ( 1.00    -0.2378)
                     ( 1.00    -0.2090)  ( 1.00    -0.2057)  ( 0.00    -0.1099)
  
 Spin polar: 0 (Spin_A minus Spin_B electrons)

 CYCLE    9
  SDIIS (wt  1.000):  0.0052 -0.0012  0.0171  0.0292  0.0524  0.1385  0.3299  0.4289
  DIIS coefficients:  0.0052 -0.0012  0.0171  0.0292  0.0524  0.1385  0.3299  0.4289
 SCF Error: norm([F,P])=      0.002156516166, max([F,P])=      0.000240600017
 ***** SPIN 1 *****
 orbitals (Q,E):
 ---------------
 A :28...38          ( 1.00    -0.3874)  ( 1.00    -0.3806)  ( 1.00    -0.3650)  ( 1.00    -0.3578)
                     ( 1.00    -0.3504)  ( 1.00    -0.3077)  ( 1.00    -0.2442)  ( 1.00    -0.2379)
                     ( 1.00    -0.2090)  ( 1.00    -0.2057)  ( 0.00    -0.1100)
 ***** SPIN 2 *****
 orbitals (Q,E):
 ---------------
 A :28...38          ( 1.00    -0.3874)  ( 1.00    -0.3806)  ( 1.00    -0.3650)  ( 1.00    -0.3578)
                     ( 1.00    -0.3504)  ( 1.00    -0.3077)  ( 1.00    -0.2442)  ( 1.00    -0.2379)
                     ( 1.00    -0.2090)  ( 1.00    -0.2057)  ( 0.00    -0.1100)
  
 Spin polar: 0 (Spin_A minus Spin_B electrons)

 CYCLE   10
  SDIIS (wt  1.000):  0.0018 -0.0005  0.0066  0.0129  0.0252  0.0743  0.2029  0.3222  0.3546
  DIIS coefficients:  0.0018 -0.0005  0.0066  0.0129  0.0252  0.0743  0.2029  0.3222  0.3546
 SCF Error: norm([F,P])=      0.000825884795, max([F,P])=      0.000063465492
 ***** SPIN 1 *****
 orbitals (Q,E):
 ---------------
 A :28...38          ( 1.00    -0.3874)  ( 1.00    -0.3806)  ( 1.00    -0.3650)  ( 1.00    -0.3578)
                     ( 1.00    -0.3504)  ( 1.00    -0.3078)  ( 1.00    -0.2442)  ( 1.00    -0.2379)
                     ( 1.00    -0.2091)  ( 1.00    -0.2058)  ( 0.00    -0.1100)
 ***** SPIN 2 *****
 orbitals (Q,E):
 ---------------
 A :28...38          ( 1.00    -0.3874)  ( 1.00    -0.3806)  ( 1.00    -0.3650)  ( 1.00    -0.3578)
                     ( 1.00    -0.3504)  ( 1.00    -0.3078)  ( 1.00    -0.2442)  ( 1.00    -0.2379)
                     ( 1.00    -0.2091)  ( 1.00    -0.2058)  ( 0.00    -0.1100)
  
 Spin polar: 0 (Spin_A minus Spin_B electrons)

 CYCLE   11
  SDIIS (wt  1.000):  0.0003 -0.0001  0.0013  0.0028  0.0062  0.0214  0.0643  0.1121  0.1816  0.6101
  DIIS coefficients:  0.0003 -0.0001  0.0013  0.0028  0.0062  0.0214  0.0643  0.1121  0.1816  0.6101
 SCF Error: norm([F,P])=      0.000142090360, max([F,P])=      0.000008366992
 ***** SPIN 1 *****
 orbitals (Q,E):
 ---------------
 A :28...38          ( 1.00    -0.3874)  ( 1.00    -0.3806)  ( 1.00    -0.3650)  ( 1.00    -0.3578)
                     ( 1.00    -0.3504)  ( 1.00    -0.3078)  ( 1.00    -0.2442)  ( 1.00    -0.2379)
                     ( 1.00    -0.2091)  ( 1.00    -0.2058)  ( 0.00    -0.1100)
 ***** SPIN 2 *****
 orbitals (Q,E):
 ---------------
 A :28...38          ( 1.00    -0.3874)  ( 1.00    -0.3806)  ( 1.00    -0.3650)  ( 1.00    -0.3578)
                     ( 1.00    -0.3504)  ( 1.00    -0.3078)  ( 1.00    -0.2442)  ( 1.00    -0.2379)
                     ( 1.00    -0.2091)  ( 1.00    -0.2058)  ( 0.00    -0.1100)
  
 Spin polar: 0 (Spin_A minus Spin_B electrons)

 CYCLE   12
  SDIIS (wt  1.000): -0.0000  0.0002  0.0004  0.0014  0.0062  0.0204  0.0374  0.0778  0.3740  0.4822
  DIIS coefficients: -0.0000  0.0002  0.0004  0.0014  0.0062  0.0204  0.0374  0.0778  0.3740  0.4822
 SCF Error: norm([F,P])=      0.000067005567, max([F,P])=      0.000005755709
 ***** SPIN 1 *****
 orbitals (Q,E):
 ---------------
 A :28...38          ( 1.00    -0.3874)  ( 1.00    -0.3806)  ( 1.00    -0.3650)  ( 1.00    -0.3578)
                     ( 1.00    -0.3504)  ( 1.00    -0.3078)  ( 1.00    -0.2442)  ( 1.00    -0.2379)
                     ( 1.00    -0.2091)  ( 1.00    -0.2058)  ( 0.00    -0.1100)
 ***** SPIN 2 *****
 orbitals (Q,E):
 ---------------
 A :28...38          ( 1.00    -0.3874)  ( 1.00    -0.3806)  ( 1.00    -0.3650)  ( 1.00    -0.3578)
                     ( 1.00    -0.3504)  ( 1.00    -0.3078)  ( 1.00    -0.2442)  ( 1.00    -0.2379)
                     ( 1.00    -0.2091)  ( 1.00    -0.2058)  ( 0.00    -0.1100)
  
 Spin polar: 0 (Spin_A minus Spin_B electrons)

 CYCLE   13
  SDIIS (wt  1.000): -0.0000 -0.0001  0.0002  0.0014  0.0051  0.0095  0.0279  0.1658  0.3146  0.4756
  DIIS coefficients: -0.0000 -0.0001  0.0002  0.0014  0.0051  0.0095  0.0279  0.1658  0.3146  0.4756
 SCF Error: norm([F,P])=      0.000024066429, max([F,P])=      0.000001781351
 ***** SPIN 1 *****
 orbitals (Q,E):
 ---------------
 A :28...38          ( 1.00    -0.3874)  ( 1.00    -0.3806)  ( 1.00    -0.3650)  ( 1.00    -0.3578)
                     ( 1.00    -0.3504)  ( 1.00    -0.3078)  ( 1.00    -0.2442)  ( 1.00    -0.2379)
                     ( 1.00    -0.2091)  ( 1.00    -0.2058)  ( 0.00    -0.1100)
 ***** SPIN 2 *****
 orbitals (Q,E):
 ---------------
 A :28...38          ( 1.00    -0.3874)  ( 1.00    -0.3806)  ( 1.00    -0.3650)  ( 1.00    -0.3578)
                     ( 1.00    -0.3504)  ( 1.00    -0.3078)  ( 1.00    -0.2442)  ( 1.00    -0.2379)
                     ( 1.00    -0.2091)  ( 1.00    -0.2058)  ( 0.00    -0.1100)
  
 Spin polar: 0 (Spin_A minus Spin_B electrons)

 CYCLE   14
  SDIIS (wt  1.000): -0.0000  0.0001  0.0006  0.0020  0.0035  0.0107  0.0644  0.1351  0.2658  0.5179
  DIIS coefficients: -0.0000  0.0001  0.0006  0.0020  0.0035  0.0107  0.0644  0.1351  0.2658  0.5179
 SCF Error: norm([F,P])=      0.000006329929, max([F,P])=      0.000000402203
 ***** SPIN 1 *****
 orbitals (Q,E):
 ---------------
 A :28...38          ( 1.00    -0.3874)  ( 1.00    -0.3806)  ( 1.00    -0.3650)  ( 1.00    -0.3578)
                     ( 1.00    -0.3504)  ( 1.00    -0.3078)  ( 1.00    -0.2442)  ( 1.00    -0.2379)
                     ( 1.00    -0.2091)  ( 1.00    -0.2058)  ( 0.00    -0.1100)
 ***** SPIN 2 *****
 orbitals (Q,E):
 ---------------
 A :28...38          ( 1.00    -0.3874)  ( 1.00    -0.3806)  ( 1.00    -0.3650)  ( 1.00    -0.3578)
                     ( 1.00    -0.3504)  ( 1.00    -0.3078)  ( 1.00    -0.2442)  ( 1.00    -0.2379)
                     ( 1.00    -0.2091)  ( 1.00    -0.2058)  ( 0.00    -0.1100)
  
 Spin polar: 0 (Spin_A minus Spin_B electrons)

 CYCLE   15
  SDIIS (wt  1.000):  0.0001  0.0003  0.0010  0.0016  0.0040  0.0205  0.0416  0.0962  0.2541  0.5805
  DIIS coefficients:  0.0001  0.0003  0.0010  0.0016  0.0040  0.0205  0.0416  0.0962  0.2541  0.5805
 SCF Error: norm([F,P])=      0.000001516868, max([F,P])=      0.000000085868
 ***** SPIN 1 *****
 orbitals (Q,E):
 ---------------
 A :28...38          ( 1.00    -0.3874)  ( 1.00    -0.3806)  ( 1.00    -0.3650)  ( 1.00    -0.3578)
                     ( 1.00    -0.3504)  ( 1.00    -0.3078)  ( 1.00    -0.2442)  ( 1.00    -0.2379)
                     ( 1.00    -0.2091)  ( 1.00    -0.2058)  ( 0.00    -0.1100)
 ***** SPIN 2 *****
 orbitals (Q,E):
 ---------------
 A :28...38          ( 1.00    -0.3874)  ( 1.00    -0.3806)  ( 1.00    -0.3650)  ( 1.00    -0.3578)
                     ( 1.00    -0.3504)  ( 1.00    -0.3078)  ( 1.00    -0.2442)  ( 1.00    -0.2379)
                     ( 1.00    -0.2091)  ( 1.00    -0.2058)  ( 0.00    -0.1100)
  
 Spin polar: 0 (Spin_A minus Spin_B electrons)

 CYCLE   16
  SDIIS (wt  1.000): -0.0000 -0.0000 -0.0000  0.0000  0.0001  0.0013  0.0092  0.0373  0.1901  0.7619
  DIIS coefficients: -0.0000 -0.0000 -0.0000  0.0000  0.0001  0.0013  0.0092  0.0373  0.1901  0.7619
 SCF Error: norm([F,P])=      0.000000324881, max([F,P])=      0.000000018359
 ***** SPIN 1 *****
 orbitals (Q,E):
 ---------------
 A :28...38          ( 1.00    -0.3874)  ( 1.00    -0.3806)  ( 1.00    -0.3650)  ( 1.00    -0.3578)
                     ( 1.00    -0.3504)  ( 1.00    -0.3078)  ( 1.00    -0.2442)  ( 1.00    -0.2379)
                     ( 1.00    -0.2091)  ( 1.00    -0.2058)  ( 0.00    -0.1100)
 ***** SPIN 2 *****
 orbitals (Q,E):
 ---------------
 A :28...38          ( 1.00    -0.3874)  ( 1.00    -0.3806)  ( 1.00    -0.3650)  ( 1.00    -0.3578)
                     ( 1.00    -0.3504)  ( 1.00    -0.3078)  ( 1.00    -0.2442)  ( 1.00    -0.2379)
                     ( 1.00    -0.2091)  ( 1.00    -0.2058)  ( 0.00    -0.1100)
  
 Spin polar: 0 (Spin_A minus Spin_B electrons)

 CYCLE   17
  SDIIS (wt  1.000):  0.0000  0.0000  0.0001  0.0003  0.0012  0.0055  0.0185  0.1112  0.4704  0.3928
  DIIS coefficients:  0.0000  0.0000  0.0001  0.0003  0.0012  0.0055  0.0185  0.1112  0.4704  0.3928
 SCF Error: norm([F,P])=      0.000000278358, max([F,P])=      0.000000019601
 ***** SPIN 1 *****
 orbitals (Q,E):
 ---------------
 A :28...38          ( 1.00    -0.3874)  ( 1.00    -0.3806)  ( 1.00    -0.3650)  ( 1.00    -0.3578)
                     ( 1.00    -0.3504)  ( 1.00    -0.3078)  ( 1.00    -0.2442)  ( 1.00    -0.2379)
                     ( 1.00    -0.2091)  ( 1.00    -0.2058)  ( 0.00    -0.1100)
 ***** SPIN 2 *****
 orbitals (Q,E):
 ---------------
 A :28...38          ( 1.00    -0.3874)  ( 1.00    -0.3806)  ( 1.00    -0.3650)  ( 1.00    -0.3578)
                     ( 1.00    -0.3504)  ( 1.00    -0.3078)  ( 1.00    -0.2442)  ( 1.00    -0.2379)
                     ( 1.00    -0.2091)  ( 1.00    -0.2058)  ( 0.00    -0.1100)
  
 Spin polar: 0 (Spin_A minus Spin_B electrons)

 CYCLE   18
  SDIIS (wt  1.000): -0.0000  0.0000  0.0001  0.0007  0.0030  0.0096  0.0555  0.2479  0.2324  0.4507
  DIIS coefficients: -0.0000  0.0000  0.0001  0.0007  0.0030  0.0096  0.0555  0.2479  0.2324  0.4507
 SCF Error: norm([F,P])=      0.000000069463, max([F,P])=      0.000000006338
 ***** SPIN 1 *****
 orbitals (Q,E):
 ---------------
 A :28...38          ( 1.00    -0.3874)  ( 1.00    -0.3806)  ( 1.00    -0.3650)  ( 1.00    -0.3578)
                     ( 1.00    -0.3504)  ( 1.00    -0.3078)  ( 1.00    -0.2442)  ( 1.00    -0.2379)
                     ( 1.00    -0.2091)  ( 1.00    -0.2058)  ( 0.00    -0.1100)
 ***** SPIN 2 *****
 orbitals (Q,E):
 ---------------
 A :28...38          ( 1.00    -0.3874)  ( 1.00    -0.3806)  ( 1.00    -0.3650)  ( 1.00    -0.3578)
                     ( 1.00    -0.3504)  ( 1.00    -0.3078)  ( 1.00    -0.2442)  ( 1.00    -0.2379)
                     ( 1.00    -0.2091)  ( 1.00    -0.2058)  ( 0.00    -0.1100)
  
 Spin polar: 0 (Spin_A minus Spin_B electrons)

 SCF CONVERGED

 CYCLE   19
 *** Setting up for NEW gradients in Focky
 *** Using FIT density in Focky
 ***** SPIN 1 *****
 orbitals (Q,E):
 ---------------
 A :28...47          ( 1.00    -0.3874)  ( 1.00    -0.3806)  ( 1.00    -0.3650)  ( 1.00    -0.3578)
                     ( 1.00    -0.3504)  ( 1.00    -0.3078)  ( 1.00    -0.2442)  ( 1.00    -0.2379)
                     ( 1.00    -0.2091)  ( 1.00    -0.2058)  ( 0.00    -0.1100)  ( 0.00    -0.0841)
                     ( 0.00    -0.0346)  ( 0.00    -0.0051)  ( 0.00     0.0059)  ( 0.00     0.0151)
                     ( 0.00     0.0253)  ( 0.00     0.0355)  ( 0.00     0.0568)  ( 0.00     0.0643)
 ***** SPIN 2 *****
 orbitals (Q,E):
 ---------------
 A :28...47          ( 1.00    -0.3874)  ( 1.00    -0.3806)  ( 1.00    -0.3650)  ( 1.00    -0.3578)
                     ( 1.00    -0.3504)  ( 1.00    -0.3078)  ( 1.00    -0.2442)  ( 1.00    -0.2379)
                     ( 1.00    -0.2091)  ( 1.00    -0.2058)  ( 0.00    -0.1100)  ( 0.00    -0.0841)
                     ( 0.00    -0.0346)  ( 0.00    -0.0051)  ( 0.00     0.0059)  ( 0.00     0.0151)
                     ( 0.00     0.0253)  ( 0.00     0.0355)  ( 0.00     0.0568)  ( 0.00     0.0643)
  
 Spin polar: 0 (Spin_A minus Spin_B electrons)


 Fit test: (difference of exact and fit density, squared integrated, result summed over spins)
         SCF:                                          0.00001546195275

 Gross Charges per Atom (Z minus electrons)
 ==========================================
            -0.1436    0.0082   -0.0367    0.0241   -0.5491   -0.0138    0.5708   -0.0925    0.3921    0.0670
             0.5619   -0.1663   -0.1436   -0.2205   -0.2578
 Net Total: -0.00000000


 =================================================================
 M U L T I P O L E   D E R I V E D   C H A R G E   A N A L Y S I S
 =================================================================

 See: M. Swart, P.Th. van Duijnen, J.G. Snijders, J.Comput.Chem., (2001), p. 79-88.

 ----------------------------------------------------- 
 MDC atomic charges (includes spinA + spinB electrons)
 ----------------------------------------------------- 

        Atom    Level:     MDC-m        MDC-d        MDC-q
 ---------------------------------------------------------
     1     H           -0.046035    -0.014056    -3.308328
     2     H            0.057591     0.146502   -12.509761
     3     N           -0.047852     0.012846    21.499512
     4     N           -0.034487     0.026757   -20.320295
     5     O           -0.409007    -0.500009     0.201039
     6     H            0.046383     0.117594     9.261165
     7     C            0.252856     0.341276     3.016299
     8     C            0.005076    -0.005337    -3.134868
     9     C            0.149458     0.131486     4.448625
    10     C           -0.124191    -0.159691    -2.076832
    11     C            0.218503     0.171245     2.700071
    12     H           -0.020873     0.028002    -1.442060
    13     H           -0.046083    -0.015034    -3.331713
    14     H           -0.064207    -0.060658     3.819254
    15     S            0.062867    -0.220923     1.177891

 -------------------------------- 
 MDC spin density (spinA - spinB)
 -------------------------------- 

        Atom    Level:     MDC-m        MDC-d        MDC-q
 ---------------------------------------------------------
     1     H            0.000000     0.000000     0.000000
     2     H           -0.000000     0.000000     0.000000
     3     N            0.000000    -0.000000    -0.000000
     4     N            0.000000     0.000000     0.000000
     5     O            0.000000     0.000000    -0.000000
     6     H           -0.000000    -0.000000    -0.000000
     7     C            0.000000     0.000000    -0.000000
     8     C           -0.000000     0.000000     0.000000
     9     C            0.000000     0.000000    -0.000000
    10     C           -0.000000     0.000000    -0.000000
    11     C           -0.000000    -0.000000    -0.000000
    12     H            0.000000     0.000000     0.000000
    13     H           -0.000000    -0.000000     0.000000
    14     H            0.000000    -0.000000    -0.000000
    15     S            0.000000     0.000000     0.000000


 ==========
 S**2 value  ***  see also R. Bulo et al., J.Am.Chem.Soc., 124 (2002) 13903-13910, note (29)  ***
 ==========
  
                                       exact      expectation value

 Total S2 (S squared)                  0.00000            -0.00000


 =======================================
 OCCUPIED-VIRTUAL DIPOLE MATRIX ELEMENTS  ***  (numeric integrals)  ***
 =======================================
  

**************************************************************************
*                                                                        *
*        EXCITATION ENERGY CALCULATION, a part of the ADF-RESPONSE code  *
*                                                                        *
*        RESPONSE, extension of the ADF program for linear and nonlinear *
*        response calculations, by:                                      *
*        S.J.A. van Gisbergen, J.G. Snijders and E.J. Baerends,          *
*                   with contributions by:                               *
*        J.A. Groeneveld, F. Kootstra, and V.P. Osinga                   *
*              version of February 1999, in ADF99                        *
*                                                                        *
*        The most extensive description of the used algorithms is        *
*        given in: S.J.A. van Gisbergen, J.G. Snijders, E.J. Baerends    *
*                  Comp. Phys. Commun. 118 (1999) p.119-138              *
*        and in: S.J.A. van Gisbergen, Ph.D. thesis Amsterdam (1998)     *
*                                                                        *
**************************************************************************


**************************************************************************
*                                                                        *
*             Data for EXCITATION program part                           *
*                                                                        *
* Relevant references are:                                               *
*   S.J.A. van Gisbergen, J.G. Snijders, E.J. Baerends,                  *
*     Comput. Phys. Commun. 118, p.119 (1999)                            *
*   S.J.A. van Gisbergen, F. Kootstra, P.R.T. Schipper, O.V. Gritsenko,  *
*   J. G. Snijders, E.J. Baerends, Phys. Rev. A57 p.2556 (1998)          *
*                                                                        *
*   Ch. Jamorski, M.E. Casida, and D.R. Salahub                          *
*        J. Chem. Phys. 104, p.5134 (1996)                               *
*   R. Bauernschmitt and R. Ahlrichs Chem. Phys. Lett. 256, p.454 (1996) *
*                                                                        *
*   Maximum number of cycles in Davidson part, ndvcyc =              200 *
*                                                                        *
*   The exchange correlation kernel f_xc which is used, is               *
*   Adiabatic LDA, which is frequency-independent.                       *
*                                                                        *
*   Tails of functions are neglected                                     *
*         tailbas =    0.1000000000E-15                                  *
*         tailfit =    0.1000000000E-15                                  *
*   Dipole-allowed irreps are = A                                        *
*                               A                                        *
*                               A                                        *
*                                                                        *
*   Nr of excitation energies per irrep to be calculated                 *
*   Excitations calculated with the davidson method                      *
*       4 of    20054 excitations in irrep A    column   1               *
*                                                                        *
**************************************************************************

 The Clebsch-Gordan series for each direct product
                               A
                         -------
 A * A                        X


**************************************************************************
*****  STARTING CALCULATION OF SPIN-UNRESTRICTED EXCITATION ENERGIES  ******
**************************************************************************


Eigenvalues of small (approximate) problem
   i, eigenvalue(i) in dvdson     1    0.9199250888E-01
   i, eigenvalue(i) in dvdson     2    0.9436041582E-01
   i, eigenvalue(i) in dvdson     3    0.9814177510E-01
   i, eigenvalue(i) in dvdson     4    0.1525343678E+00
Eigenvalues of small (approximate) problem
   i, eigenvalue(i) in dvdson     1    0.8953754544E-01
   i, eigenvalue(i) in dvdson     2    0.9403691338E-01
   i, eigenvalue(i) in dvdson     3    0.9751648453E-01
   i, eigenvalue(i) in dvdson     4    0.1377899310E+00
Eigenvalues of small (approximate) problem
   i, eigenvalue(i) in dvdson     1    0.8949194899E-01
   i, eigenvalue(i) in dvdson     2    0.9403600180E-01
   i, eigenvalue(i) in dvdson     3    0.9751137896E-01
   i, eigenvalue(i) in dvdson     4    0.1356486248E+00
Eigenvalues of small (approximate) problem
   i, eigenvalue(i) in dvdson     1    0.8949016979E-01
   i, eigenvalue(i) in dvdson     2    0.9403599602E-01
   i, eigenvalue(i) in dvdson     3    0.9751051266E-01
   i, eigenvalue(i) in dvdson     4    0.1317095516E+00
Eigenvalues of small (approximate) problem
   i, eigenvalue(i) in dvdson     1    0.8949010049E-01
   i, eigenvalue(i) in dvdson     2    0.9403599598E-01
   i, eigenvalue(i) in dvdson     3    0.9751045805E-01
   i, eigenvalue(i) in dvdson     4    0.1218233976E+00
Eigenvalues of small (approximate) problem
   i, eigenvalue(i) in dvdson     1    0.8949009691E-01
   i, eigenvalue(i) in dvdson     2    0.9403599598E-01
   i, eigenvalue(i) in dvdson     3    0.9751045169E-01
   i, eigenvalue(i) in dvdson     4    0.1189707635E+00
Eigenvalues of small (approximate) problem
   i, eigenvalue(i) in dvdson     1    0.8949009680E-01
   i, eigenvalue(i) in dvdson     2    0.9403599598E-01
   i, eigenvalue(i) in dvdson     3    0.9751043684E-01
   i, eigenvalue(i) in dvdson     4    0.1188353669E+00
Eigenvalues of small (approximate) problem
   i, eigenvalue(i) in dvdson     1    0.8949009680E-01
   i, eigenvalue(i) in dvdson     2    0.9403599598E-01
   i, eigenvalue(i) in dvdson     3    0.9751043075E-01
   i, eigenvalue(i) in dvdson     4    0.1153000423E+00
Eigenvalues of small (approximate) problem
   i, eigenvalue(i) in dvdson     1    0.8949009680E-01
   i, eigenvalue(i) in dvdson     2    0.9403599598E-01
   i, eigenvalue(i) in dvdson     3    0.9751043006E-01
   i, eigenvalue(i) in dvdson     4    0.1150708220E+00
Eigenvalues of small (approximate) problem
   i, eigenvalue(i) in dvdson     1    0.8949009680E-01
   i, eigenvalue(i) in dvdson     2    0.9403599598E-01
   i, eigenvalue(i) in dvdson     3    0.9751042992E-01
   i, eigenvalue(i) in dvdson     4    0.1150637116E+00
Eigenvalues of small (approximate) problem
   i, eigenvalue(i) in dvdson     1    0.8949009680E-01
   i, eigenvalue(i) in dvdson     2    0.9403599598E-01
   i, eigenvalue(i) in dvdson     3    0.9751042990E-01
   i, eigenvalue(i) in dvdson     4    0.1150633798E+00


**************************************************************************
*                                                                        *
*   Final excitation energies from Davidson algorithm                    *
*                                                                        *
**************************************************************************

    Number of loops in Davidson routine     =   11                    
    Number of matrix-vector multiplications =   35                    
    Type of excitations = SPIN-UNRESTRICTED                                 
                                                                          

 Symmetry A    

 Excitation energies E in a.u. and eV, dE wrt prev. cycle,
 oscillator strengths f in a.u.

 no.  E/a.u.        E/eV      f           dE/a.u.
 -----------------------------------------------------
   1 0.89490E-01  2.4351     0.27526E-15  0.35E-15
   2 0.94036E-01  2.5588     0.84613E-15  0.93E-15
   3 0.97510E-01  2.6534     0.31996E-04  0.34E-11
   4 0.11506      3.1310     0.80012E-07  0.76E-07
 
 Transition dipole moments mu (x,y,z) in a.u.
 (weak excitations are not printed)

 no.  E/eV          f                       mu (x,y,z)
 ------------------------------------------------------------------
   3  2.6534     0.31996E-04  0.40375E-02 -0.38359E-02  0.21475E-01
 
                                                        
 Major MO -> MO transitions for the above excitations   
                                                        
    Excitation  Occupied to virtual  Contribution       

     Nr.          orbitals           weight        contributions to     
                                     (sum=1) transition dipole moment   
                                              x       y       z       


     1: Alph  36a     ->  38a        0.4880 -1.3699 -0.2588 -0.0376
     1: Beta  36a     ->  38a        0.4880  1.3699  0.2588  0.0376
     1: Beta  36a     ->  39a        0.0042  0.1064 -0.0657 -0.0100
     1: Alph  36a     ->  39a        0.0042 -0.1064  0.0657  0.0100
     1: Alph  34a     ->  38a        0.0036 -0.0458 -0.0531 -0.0082
     1: Beta  34a     ->  38a        0.0036  0.0458  0.0531  0.0082
     1: Beta  34a     ->  39a        0.0018  0.0564  0.0690  0.0101
     1: Alph  34a     ->  39a        0.0018 -0.0564 -0.0690 -0.0101
     1: Alph  33a     ->  38a        0.0009  0.0002 -0.0300 -0.0045
     1: Beta  33a     ->  38a        0.0009 -0.0002  0.0300  0.0045
     1: Alph  34a     ->  44a        0.0003 -0.0009  0.0034  0.0004
     1: Beta  34a     ->  44a        0.0003  0.0009 -0.0034 -0.0004
     1: Alph  36a     ->  44a        0.0002 -0.0077  0.0010  0.0001
     1: Beta  36a     ->  44a        0.0002  0.0077 -0.0010 -0.0001
     1: Alph  37a     ->  38a        0.0002 -0.0003 -0.0000 -0.0002


     2: Alph  37a     ->  38a        0.4978  0.0182  0.0001  0.0118
     2: Beta  37a     ->  38a        0.4978 -0.0182 -0.0001 -0.0118
     2: Beta  37a     ->  39a        0.0019 -0.0003  0.0004  0.0003
     2: Alph  37a     ->  39a        0.0019  0.0003 -0.0004 -0.0003


     3: Beta  37a     ->  38a        0.4977  0.0179  0.0001  0.0116
     3: Alph  37a     ->  38a        0.4977  0.0179  0.0001  0.0116
     3: Beta  37a     ->  39a        0.0021 -0.0003  0.0004  0.0003
     3: Alph  37a     ->  39a        0.0021 -0.0003  0.0004  0.0003


     4: Alph  36a     ->  39a        0.3982 -0.9160  0.5655  0.0862
     4: Beta  36a     ->  39a        0.3970  0.9146 -0.5646 -0.0861
     4: Alph  34a     ->  38a        0.0986  0.2106  0.2445  0.0378
     4: Beta  34a     ->  38a        0.0985 -0.2105 -0.2444 -0.0377
     4: Alph  36a     ->  38a        0.0009  0.0510  0.0096  0.0014
     4: Alph  33a     ->  38a        0.0008 -0.0002  0.0259  0.0039
     4: Beta  33a     ->  38a        0.0008  0.0002 -0.0257 -0.0039
     4: Beta  36a     ->  38a        0.0008 -0.0491 -0.0093 -0.0014
     4: Beta  33a     ->  39a        0.0006 -0.0263 -0.0074 -0.0012
     4: Alph  33a     ->  39a        0.0006  0.0262  0.0074  0.0012
     4: Alph  36a     ->  44a        0.0005  0.0117 -0.0016 -0.0001
     4: Beta  36a     ->  44a        0.0005 -0.0117  0.0016  0.0001
     4: Beta  34a     ->  39a        0.0003 -0.0207 -0.0253 -0.0037
 

 All SPIN-UNRESTRICTED excitation energies 

 no.     E/a.u.        E/eV      f           Symmetry
 -----------------------------------------------------
   1:     0.08949      2.43515   0.2753E-15  A           
   2:     0.09404      2.55885   0.8461E-15  A           
   3:     0.09751      2.65339   0.3200E-04  A           
   4:     0.11506      3.13103   0.8001E-07  A           


 Normal termination of EXCITATION program part


 *** Using NEW gradient routines ***

 *** Calculating Gradients of Excitation Energy ***

 Relevent references:
    C. Van Caille and R. D. Amos, Chem. Phys. Lett. 308,249 (1999) and 317,159 (2000)
    F. Furche and R. Ahlrichs, J. Chem. Phys. 117,7433 (2002)
    M. Seth, G. Mazur,  T. Ziegler, Theor. Chem. Acc., 129, 331 (2011) 


   ---Begin solution of CPKS Equations--
   Real perturbation
Iter    5 Error   0.010268
  CPKS converged. Remaining residual is  0.0000609

 *** Finished Excitation Energy Gradients ***


 Geometry CYCLE 2
 ==============

 Energy gradients wrt nuclear displacements
 ==========================================

     Atom      Cartesian (a.u./angstrom)
                 X         Y         Z
 ----------------------------------------
     1 H     0.002225  0.000985 -0.002973
     2 H    -0.000701  0.006024  0.000905
     3 N    -0.071912 -0.017155 -0.002806
     4 N    -0.028412  0.059869  0.009151
     5 O    -0.049470 -0.035525 -0.005476
     6 H    -0.008586  0.000189 -0.000016
     7 C     0.072491 -0.010052 -0.000969
     8 C    -0.008230  0.024945  0.003602
     9 C    -0.001944  0.016277  0.002375
    10 C     0.073164 -0.038757 -0.005774
    11 C    -0.007429 -0.007827 -0.001264
    12 H    -0.004303  0.003168  0.000364
    13 H     0.002188  0.000081  0.003245
    14 H     0.001214  0.002558  0.000398
    15 S     0.029705 -0.004780 -0.000763
 ----------------------------------------

 dE(predicted):    -0.10339E+00, dE(actual):    -0.75262E-01, Trust radius:    0.774597, all in a.u.
 
----------------------------------------------------------------------
Geometry Convergence after Step   2       (Hartree/Angstrom,Angstrom)
----------------------------------------------------------------------
current energy                               -3.37083928 Hartree
energy change                      -0.07526200     0.00100000    F
constrained gradient max            0.07316350     0.00100000    F
constrained gradient rms            0.02499461     0.00066667    F
gradient max                        0.07316350
gradient rms                        0.02499461
cart. step max                      0.05582965     0.01000000    F
cart. step rms                      0.02049158     0.00666667    F
 


 Coordinates (Cartesian)
 =======================

     Atom                    bohr                                 angstrom                 Geometric Variables
                   X           Y           Z              X           Y           Z       (0:frozen, *:LT par.)
 --------------------------------------------------------------------------------------------------------------
     1 H      -5.185548    0.242874   -1.673017      -2.744074    0.128523   -0.885322      1       2       3
     2 H       2.628712   -4.362087   -0.630760       1.391055   -2.308317   -0.333784      4       5       6
     3 N       1.969685   -2.577352   -0.367269       1.042313   -1.363876   -0.194350      7       8       9
     4 N       2.835713    1.646968    0.255541       1.500595    0.871538    0.135226     10      11      12
     5 O      -2.067818   -4.090676   -0.600761      -1.094242   -2.164692   -0.317909     13      14      15
     6 H       4.176191    3.009570    0.459978       2.209945    1.592596    0.243410     16      17      18
     7 C      -0.692239   -2.241466   -0.325711      -0.366317   -1.186133   -0.172359     19      20      21
     8 C      -1.522379    0.317256    0.046180      -0.805608    0.167884    0.024437     22      23      24
     9 C       0.344130    2.308884    0.351019       0.182105    1.221809    0.185751     25      26      27
    10 C       3.772615   -0.690959   -0.092639       1.996382   -0.365640   -0.049022     28      29      30
    11 C      -4.281228    0.846056    0.102564      -2.265528    0.447714    0.054275     31      32      33
    12 H      -0.095310    4.288623    0.646789      -0.050436    2.269441    0.342266     34      35      36
    13 H      -5.213075   -0.243445    1.612018      -2.758641   -0.128825    0.853043     37      38      39
    14 H      -4.661193    2.863072    0.397448      -2.466597    1.515073    0.210320     40      41      42
    15 S       7.003063   -1.256735   -0.194072       3.705861   -0.665035   -0.102699     43      44      45
 --------------------------------------------------------------------------------------------------------------

 Number of elements of the density matrix on this node (used, total):      4395     61425


 ===========================================
 Numerical Integration : Fuzzy Cells (Becke)
 ===========================================
  
 Becke grid quality: GOOD           
  
 Lebedev angular grid order:             min:  11 max:  31
 Nr. of radial points:                   min:  54 max:  72

 Total nr. of points:     191058
 Nr. of blocks:             1493
 Block length:               128
 Nr. of dummy points:         46


 Test of Precision of the Numerical Integration Grid
 ===================================================

 Integral of the Total Core Density:                   0.00000000000000


 ========================
 Density Fitting (zlmFit)
 ========================
  
 ZlmFit Fit Quality: GOOD           
  
 Max L-expansion:                        min:   8 max:   9
 Nr. of radial interpolation points:     min:  78 max: 108


 =====
 S C F  ***  ScaSCF  ***
 =====
  
 Initial density matrix is taken from previous geometry

 CYCLE    1
 SCF Error: norm([F,P])=      0.293596111742, max([F,P])=      0.035197709237
 ***** SPIN 1 *****
 orbitals (Q,E):
 ---------------
 A :28...47          ( 1.00    -0.3801)  ( 1.00    -0.3741)  ( 1.00    -0.3558)  ( 1.00    -0.3490)
                     ( 1.00    -0.3420)  ( 1.00    -0.2984)  ( 1.00    -0.2331)  ( 1.00    -0.2282)
                     ( 1.00    -0.2001)  ( 1.00    -0.1987)  ( 0.00    -0.0988)  ( 0.00    -0.0609)
                     ( 0.00    -0.0285)  ( 0.00     0.0007)  ( 0.00     0.0134)  ( 0.00     0.0276)
                     ( 0.00     0.0412)  ( 0.00     0.0423)  ( 0.00     0.0627)  ( 0.00     0.0743)
 ***** SPIN 2 *****
 orbitals (Q,E):
 ---------------
 A :28...47          ( 1.00    -0.3801)  ( 1.00    -0.3741)  ( 1.00    -0.3558)  ( 1.00    -0.3490)
                     ( 1.00    -0.3420)  ( 1.00    -0.2984)  ( 1.00    -0.2331)  ( 1.00    -0.2282)
                     ( 1.00    -0.2001)  ( 1.00    -0.1987)  ( 0.00    -0.0988)  ( 0.00    -0.0609)
                     ( 0.00    -0.0285)  ( 0.00     0.0007)  ( 0.00     0.0134)  ( 0.00     0.0276)
                     ( 0.00     0.0412)  ( 0.00     0.0423)  ( 0.00     0.0627)  ( 0.00     0.0743)
  
 Spin polar: 0 (Spin_A minus Spin_B electrons)

 CYCLE    2
   MIX coefficients:  0.8000  0.2000
 SCF Error: norm([F,P])=      0.123026767643, max([F,P])=      0.014075847730
 ***** SPIN 1 *****
 orbitals (Q,E):
 ---------------
 A :28...38          ( 1.00    -0.3847)  ( 1.00    -0.3780)  ( 1.00    -0.3623)  ( 1.00    -0.3518)
                     ( 1.00    -0.3437)  ( 1.00    -0.3041)  ( 1.00    -0.2379)  ( 1.00    -0.2331)
                     ( 1.00    -0.1999)  ( 1.00    -0.1957)  ( 0.00    -0.1041)
 ***** SPIN 2 *****
 orbitals (Q,E):
 ---------------
 A :28...38          ( 1.00    -0.3847)  ( 1.00    -0.3780)  ( 1.00    -0.3623)  ( 1.00    -0.3518)
                     ( 1.00    -0.3437)  ( 1.00    -0.3041)  ( 1.00    -0.2379)  ( 1.00    -0.2331)
                     ( 1.00    -0.1999)  ( 1.00    -0.1957)  ( 0.00    -0.1041)
  
 Spin polar: 0 (Spin_A minus Spin_B electrons)

 CYCLE    3
  SDIIS (wt  0.000): -0.2208  1.2208
 A-DIIS (wt  1.000):  0.0000  1.0000
  DIIS coefficients:  0.0000  1.0000
 SCF Error: norm([F,P])=      0.034316532173, max([F,P])=      0.003188574132
 ***** SPIN 1 *****
 orbitals (Q,E):
 ---------------
 A :28...38          ( 1.00    -0.3963)  ( 1.00    -0.3868)  ( 1.00    -0.3749)  ( 1.00    -0.3603)
                     ( 1.00    -0.3485)  ( 1.00    -0.3149)  ( 1.00    -0.2494)  ( 1.00    -0.2475)
                     ( 1.00    -0.2034)  ( 1.00    -0.1962)  ( 0.00    -0.1145)
 ***** SPIN 2 *****
 orbitals (Q,E):
 ---------------
 A :28...38          ( 1.00    -0.3963)  ( 1.00    -0.3868)  ( 1.00    -0.3749)  ( 1.00    -0.3603)
                     ( 1.00    -0.3485)  ( 1.00    -0.3149)  ( 1.00    -0.2494)  ( 1.00    -0.2475)
                     ( 1.00    -0.2034)  ( 1.00    -0.1962)  ( 0.00    -0.1145)
  
 Spin polar: 0 (Spin_A minus Spin_B electrons)

 CYCLE    4
  SDIIS (wt  0.000):  0.1724  0.4107  0.4169
 A-DIIS (wt  1.000):  0.0000  0.8013  0.1987
  DIIS coefficients:  0.0000  0.8013  0.1987
 SCF Error: norm([F,P])=      0.079200067880, max([F,P])=      0.009396603887
 ***** SPIN 1 *****
 orbitals (Q,E):
 ---------------
 A :28...38          ( 1.00    -0.3935)  ( 1.00    -0.3850)  ( 1.00    -0.3720)  ( 1.00    -0.3588)
                     ( 1.00    -0.3491)  ( 1.00    -0.3125)  ( 1.00    -0.2467)  ( 1.00    -0.2438)
                     ( 1.00    -0.2047)  ( 1.00    -0.1991)  ( 0.00    -0.1123)
 ***** SPIN 2 *****
 orbitals (Q,E):
 ---------------
 A :28...38          ( 1.00    -0.3935)  ( 1.00    -0.3850)  ( 1.00    -0.3720)  ( 1.00    -0.3588)
                     ( 1.00    -0.3491)  ( 1.00    -0.3125)  ( 1.00    -0.2467)  ( 1.00    -0.2438)
                     ( 1.00    -0.2047)  ( 1.00    -0.1991)  ( 0.00    -0.1123)
  
 Spin polar: 0 (Spin_A minus Spin_B electrons)

 CYCLE    5
  SDIIS (wt  0.995): -0.1069  0.4395 -0.1912  0.8587
 A-DIIS (wt  0.005):  0.0000  0.2699  0.0000  0.7301
  DIIS coefficients: -0.1064  0.4386 -0.1902  0.8580
 SCF Error: norm([F,P])=      0.020787496507, max([F,P])=      0.001522104177
 ***** SPIN 1 *****
 orbitals (Q,E):
 ---------------
 A :28...38          ( 1.00    -0.3925)  ( 1.00    -0.3847)  ( 1.00    -0.3708)  ( 1.00    -0.3583)
                     ( 1.00    -0.3487)  ( 1.00    -0.3118)  ( 1.00    -0.2459)  ( 1.00    -0.2424)
                     ( 1.00    -0.2046)  ( 1.00    -0.1991)  ( 0.00    -0.1115)
 ***** SPIN 2 *****
 orbitals (Q,E):
 ---------------
 A :28...38          ( 1.00    -0.3925)  ( 1.00    -0.3847)  ( 1.00    -0.3708)  ( 1.00    -0.3583)
                     ( 1.00    -0.3487)  ( 1.00    -0.3118)  ( 1.00    -0.2459)  ( 1.00    -0.2424)
                     ( 1.00    -0.2046)  ( 1.00    -0.1991)  ( 0.00    -0.1115)
  
 Spin polar: 0 (Spin_A minus Spin_B electrons)

 CYCLE    6
  SDIIS (wt  1.000): -0.0916  0.2656 -0.1973  0.6576  0.3657
  DIIS coefficients: -0.0916  0.2656 -0.1973  0.6576  0.3657
 SCF Error: norm([F,P])=      0.009242735520, max([F,P])=      0.000689557776
 ***** SPIN 1 *****
 orbitals (Q,E):
 ---------------
 A :28...38          ( 1.00    -0.3921)  ( 1.00    -0.3844)  ( 1.00    -0.3705)  ( 1.00    -0.3581)
                     ( 1.00    -0.3489)  ( 1.00    -0.3115)  ( 1.00    -0.2456)  ( 1.00    -0.2418)
                     ( 1.00    -0.2048)  ( 1.00    -0.1995)  ( 0.00    -0.1114)
 ***** SPIN 2 *****
 orbitals (Q,E):
 ---------------
 A :28...38          ( 1.00    -0.3921)  ( 1.00    -0.3844)  ( 1.00    -0.3705)  ( 1.00    -0.3581)
                     ( 1.00    -0.3489)  ( 1.00    -0.3115)  ( 1.00    -0.2456)  ( 1.00    -0.2418)
                     ( 1.00    -0.2048)  ( 1.00    -0.1995)  ( 0.00    -0.1114)
  
 Spin polar: 0 (Spin_A minus Spin_B electrons)

 CYCLE    7
  SDIIS (wt  1.000): -0.0512  0.1414 -0.1214  0.3829  0.2659  0.3825
  DIIS coefficients: -0.0512  0.1414 -0.1214  0.3829  0.2659  0.3825
 SCF Error: norm([F,P])=      0.002802536021, max([F,P])=      0.000236168205
 ***** SPIN 1 *****
 orbitals (Q,E):
 ---------------
 A :28...38          ( 1.00    -0.3921)  ( 1.00    -0.3844)  ( 1.00    -0.3706)  ( 1.00    -0.3582)
                     ( 1.00    -0.3489)  ( 1.00    -0.3115)  ( 1.00    -0.2456)  ( 1.00    -0.2419)
                     ( 1.00    -0.2048)  ( 1.00    -0.1995)  ( 0.00    -0.1114)
 ***** SPIN 2 *****
 orbitals (Q,E):
 ---------------
 A :28...38          ( 1.00    -0.3921)  ( 1.00    -0.3844)  ( 1.00    -0.3706)  ( 1.00    -0.3582)
                     ( 1.00    -0.3489)  ( 1.00    -0.3115)  ( 1.00    -0.2456)  ( 1.00    -0.2419)
                     ( 1.00    -0.2048)  ( 1.00    -0.1995)  ( 0.00    -0.1114)
  
 Spin polar: 0 (Spin_A minus Spin_B electrons)

 CYCLE    8
  SDIIS (wt  1.000): -0.0201  0.0565 -0.0514  0.1596  0.1260  0.2763  0.4532
  DIIS coefficients: -0.0201  0.0565 -0.0514  0.1596  0.1260  0.2763  0.4532
 SCF Error: norm([F,P])=      0.000943775692, max([F,P])=      0.000101584759
 ***** SPIN 1 *****
 orbitals (Q,E):
 ---------------
 A :28...38          ( 1.00    -0.3921)  ( 1.00    -0.3844)  ( 1.00    -0.3706)  ( 1.00    -0.3582)
                     ( 1.00    -0.3489)  ( 1.00    -0.3115)  ( 1.00    -0.2456)  ( 1.00    -0.2419)
                     ( 1.00    -0.2048)  ( 1.00    -0.1995)  ( 0.00    -0.1114)
 ***** SPIN 2 *****
 orbitals (Q,E):
 ---------------
 A :28...38          ( 1.00    -0.3921)  ( 1.00    -0.3844)  ( 1.00    -0.3706)  ( 1.00    -0.3582)
                     ( 1.00    -0.3489)  ( 1.00    -0.3115)  ( 1.00    -0.2456)  ( 1.00    -0.2419)
                     ( 1.00    -0.2048)  ( 1.00    -0.1995)  ( 0.00    -0.1114)
  
 Spin polar: 0 (Spin_A minus Spin_B electrons)

 CYCLE    9
  SDIIS (wt  1.000): -0.0050  0.0156 -0.0144  0.0466  0.0465  0.1316  0.2978  0.4813
  DIIS coefficients: -0.0050  0.0156 -0.0144  0.0466  0.0465  0.1316  0.2978  0.4813
 SCF Error: norm([F,P])=      0.000321046822, max([F,P])=      0.000033753085
 ***** SPIN 1 *****
 orbitals (Q,E):
 ---------------
 A :28...38          ( 1.00    -0.3921)  ( 1.00    -0.3844)  ( 1.00    -0.3705)  ( 1.00    -0.3582)
                     ( 1.00    -0.3489)  ( 1.00    -0.3115)  ( 1.00    -0.2456)  ( 1.00    -0.2419)
                     ( 1.00    -0.2048)  ( 1.00    -0.1995)  ( 0.00    -0.1114)
 ***** SPIN 2 *****
 orbitals (Q,E):
 ---------------
 A :28...38          ( 1.00    -0.3921)  ( 1.00    -0.3844)  ( 1.00    -0.3705)  ( 1.00    -0.3582)
                     ( 1.00    -0.3489)  ( 1.00    -0.3115)  ( 1.00    -0.2456)  ( 1.00    -0.2419)
                     ( 1.00    -0.2048)  ( 1.00    -0.1995)  ( 0.00    -0.1114)
  
 Spin polar: 0 (Spin_A minus Spin_B electrons)

 CYCLE   10
  SDIIS (wt  1.000): -0.0012  0.0048 -0.0036  0.0137  0.0178  0.0542  0.1343  0.2989  0.4812
  DIIS coefficients: -0.0012  0.0048 -0.0036  0.0137  0.0178  0.0542  0.1343  0.2989  0.4812
 SCF Error: norm([F,P])=      0.000109926908, max([F,P])=      0.000009435125
 ***** SPIN 1 *****
 orbitals (Q,E):
 ---------------
 A :28...38          ( 1.00    -0.3921)  ( 1.00    -0.3844)  ( 1.00    -0.3706)  ( 1.00    -0.3582)
                     ( 1.00    -0.3489)  ( 1.00    -0.3115)  ( 1.00    -0.2456)  ( 1.00    -0.2419)
                     ( 1.00    -0.2048)  ( 1.00    -0.1995)  ( 0.00    -0.1114)
 ***** SPIN 2 *****
 orbitals (Q,E):
 ---------------
 A :28...38          ( 1.00    -0.3921)  ( 1.00    -0.3844)  ( 1.00    -0.3706)  ( 1.00    -0.3582)
                     ( 1.00    -0.3489)  ( 1.00    -0.3115)  ( 1.00    -0.2456)  ( 1.00    -0.2419)
                     ( 1.00    -0.2048)  ( 1.00    -0.1995)  ( 0.00    -0.1114)
  
 Spin polar: 0 (Spin_A minus Spin_B electrons)

 CYCLE   11
  SDIIS (wt  1.000): -0.0004  0.0016 -0.0009  0.0040  0.0060  0.0173  0.0439  0.1142  0.2467  0.5675
  DIIS coefficients: -0.0004  0.0016 -0.0009  0.0040  0.0060  0.0173  0.0439  0.1142  0.2467  0.5675
 SCF Error: norm([F,P])=      0.000023312513, max([F,P])=      0.000001738594
 ***** SPIN 1 *****
 orbitals (Q,E):
 ---------------
 A :28...38          ( 1.00    -0.3921)  ( 1.00    -0.3844)  ( 1.00    -0.3706)  ( 1.00    -0.3582)
                     ( 1.00    -0.3489)  ( 1.00    -0.3115)  ( 1.00    -0.2456)  ( 1.00    -0.2419)
                     ( 1.00    -0.2048)  ( 1.00    -0.1995)  ( 0.00    -0.1114)
 ***** SPIN 2 *****
 orbitals (Q,E):
 ---------------
 A :28...38          ( 1.00    -0.3921)  ( 1.00    -0.3844)  ( 1.00    -0.3706)  ( 1.00    -0.3582)
                     ( 1.00    -0.3489)  ( 1.00    -0.3115)  ( 1.00    -0.2456)  ( 1.00    -0.2419)
                     ( 1.00    -0.2048)  ( 1.00    -0.1995)  ( 0.00    -0.1114)
  
 Spin polar: 0 (Spin_A minus Spin_B electrons)

 CYCLE   12
  SDIIS (wt  1.000):  0.0002  0.0000  0.0006  0.0015  0.0046  0.0129  0.0392  0.0990  0.3353  0.5067
  DIIS coefficients:  0.0002  0.0000  0.0006  0.0015  0.0046  0.0129  0.0392  0.0990  0.3353  0.5067
 SCF Error: norm([F,P])=      0.000008764088, max([F,P])=      0.000000531279
 ***** SPIN 1 *****
 orbitals (Q,E):
 ---------------
 A :28...38          ( 1.00    -0.3921)  ( 1.00    -0.3844)  ( 1.00    -0.3706)  ( 1.00    -0.3582)
                     ( 1.00    -0.3489)  ( 1.00    -0.3115)  ( 1.00    -0.2456)  ( 1.00    -0.2419)
                     ( 1.00    -0.2048)  ( 1.00    -0.1995)  ( 0.00    -0.1114)
 ***** SPIN 2 *****
 orbitals (Q,E):
 ---------------
 A :28...38          ( 1.00    -0.3921)  ( 1.00    -0.3844)  ( 1.00    -0.3706)  ( 1.00    -0.3582)
                     ( 1.00    -0.3489)  ( 1.00    -0.3115)  ( 1.00    -0.2456)  ( 1.00    -0.2419)
                     ( 1.00    -0.2048)  ( 1.00    -0.1995)  ( 0.00    -0.1114)
  
 Spin polar: 0 (Spin_A minus Spin_B electrons)

 CYCLE   13
  SDIIS (wt  1.000): -0.0000  0.0001  0.0001  0.0002  0.0006  0.0033  0.0144  0.0989  0.2968  0.5856
  DIIS coefficients: -0.0000  0.0001  0.0001  0.0002  0.0006  0.0033  0.0144  0.0989  0.2968  0.5856
 SCF Error: norm([F,P])=      0.000003389670, max([F,P])=      0.000000236134
 ***** SPIN 1 *****
 orbitals (Q,E):
 ---------------
 A :28...38          ( 1.00    -0.3921)  ( 1.00    -0.3844)  ( 1.00    -0.3706)  ( 1.00    -0.3582)
                     ( 1.00    -0.3489)  ( 1.00    -0.3115)  ( 1.00    -0.2456)  ( 1.00    -0.2419)
                     ( 1.00    -0.2048)  ( 1.00    -0.1995)  ( 0.00    -0.1114)
 ***** SPIN 2 *****
 orbitals (Q,E):
 ---------------
 A :28...38          ( 1.00    -0.3921)  ( 1.00    -0.3844)  ( 1.00    -0.3706)  ( 1.00    -0.3582)
                     ( 1.00    -0.3489)  ( 1.00    -0.3115)  ( 1.00    -0.2456)  ( 1.00    -0.2419)
                     ( 1.00    -0.2048)  ( 1.00    -0.1995)  ( 0.00    -0.1114)
  
 Spin polar: 0 (Spin_A minus Spin_B electrons)

 CYCLE   14
  SDIIS (wt  1.000):  0.0000  0.0001  0.0005  0.0016  0.0048  0.0113  0.0526  0.1672  0.3491  0.4127
  DIIS coefficients:  0.0000  0.0001  0.0005  0.0016  0.0048  0.0113  0.0526  0.1672  0.3491  0.4127
 SCF Error: norm([F,P])=      0.000002186951, max([F,P])=      0.000000233099
 ***** SPIN 1 *****
 orbitals (Q,E):
 ---------------
 A :28...38          ( 1.00    -0.3921)  ( 1.00    -0.3844)  ( 1.00    -0.3706)  ( 1.00    -0.3582)
                     ( 1.00    -0.3489)  ( 1.00    -0.3115)  ( 1.00    -0.2456)  ( 1.00    -0.2419)
                     ( 1.00    -0.2048)  ( 1.00    -0.1995)  ( 0.00    -0.1114)
 ***** SPIN 2 *****
 orbitals (Q,E):
 ---------------
 A :28...38          ( 1.00    -0.3921)  ( 1.00    -0.3844)  ( 1.00    -0.3706)  ( 1.00    -0.3582)
                     ( 1.00    -0.3489)  ( 1.00    -0.3115)  ( 1.00    -0.2456)  ( 1.00    -0.2419)
                     ( 1.00    -0.2048)  ( 1.00    -0.1995)  ( 0.00    -0.1114)
  
 Spin polar: 0 (Spin_A minus Spin_B electrons)

 CYCLE   15
  SDIIS (wt  1.000):  0.0000  0.0001  0.0001  0.0005  0.0007  0.0092  0.0492  0.1204  0.2108  0.6091
  DIIS coefficients:  0.0000  0.0001  0.0001  0.0005  0.0007  0.0092  0.0492  0.1204  0.2108  0.6091
 SCF Error: norm([F,P])=      0.000000452902, max([F,P])=      0.000000055682
 ***** SPIN 1 *****
 orbitals (Q,E):
 ---------------
 A :28...38          ( 1.00    -0.3921)  ( 1.00    -0.3844)  ( 1.00    -0.3706)  ( 1.00    -0.3582)
                     ( 1.00    -0.3489)  ( 1.00    -0.3115)  ( 1.00    -0.2456)  ( 1.00    -0.2419)
                     ( 1.00    -0.2048)  ( 1.00    -0.1995)  ( 0.00    -0.1114)
 ***** SPIN 2 *****
 orbitals (Q,E):
 ---------------
 A :28...38          ( 1.00    -0.3921)  ( 1.00    -0.3844)  ( 1.00    -0.3706)  ( 1.00    -0.3582)
                     ( 1.00    -0.3489)  ( 1.00    -0.3115)  ( 1.00    -0.2456)  ( 1.00    -0.2419)
                     ( 1.00    -0.2048)  ( 1.00    -0.1995)  ( 0.00    -0.1114)
  
 Spin polar: 0 (Spin_A minus Spin_B electrons)

 CYCLE   16
  SDIIS (wt  1.000):  0.0000 -0.0000  0.0001  0.0002  0.0042  0.0208  0.0472  0.0869  0.3097  0.5310
  DIIS coefficients:  0.0000 -0.0000  0.0001  0.0002  0.0042  0.0208  0.0472  0.0869  0.3097  0.5310
 SCF Error: norm([F,P])=      0.000000116347, max([F,P])=      0.000000009341
 ***** SPIN 1 *****
 orbitals (Q,E):
 ---------------
 A :28...38          ( 1.00    -0.3921)  ( 1.00    -0.3844)  ( 1.00    -0.3706)  ( 1.00    -0.3582)
                     ( 1.00    -0.3489)  ( 1.00    -0.3115)  ( 1.00    -0.2456)  ( 1.00    -0.2419)
                     ( 1.00    -0.2048)  ( 1.00    -0.1995)  ( 0.00    -0.1114)
 ***** SPIN 2 *****
 orbitals (Q,E):
 ---------------
 A :28...38          ( 1.00    -0.3921)  ( 1.00    -0.3844)  ( 1.00    -0.3706)  ( 1.00    -0.3582)
                     ( 1.00    -0.3489)  ( 1.00    -0.3115)  ( 1.00    -0.2456)  ( 1.00    -0.2419)
                     ( 1.00    -0.2048)  ( 1.00    -0.1995)  ( 0.00    -0.1114)
  
 Spin polar: 0 (Spin_A minus Spin_B electrons)

 CYCLE   17
  SDIIS (wt  1.000): -0.0000  0.0000  0.0001  0.0016  0.0068  0.0143  0.0295  0.1179  0.2678  0.5619
  DIIS coefficients: -0.0000  0.0000  0.0001  0.0016  0.0068  0.0143  0.0295  0.1179  0.2678  0.5619
 SCF Error: norm([F,P])=      0.000000034755, max([F,P])=      0.000000002817
 ***** SPIN 1 *****
 orbitals (Q,E):
 ---------------
 A :28...38          ( 1.00    -0.3921)  ( 1.00    -0.3844)  ( 1.00    -0.3706)  ( 1.00    -0.3582)
                     ( 1.00    -0.3489)  ( 1.00    -0.3115)  ( 1.00    -0.2456)  ( 1.00    -0.2419)
                     ( 1.00    -0.2048)  ( 1.00    -0.1995)  ( 0.00    -0.1114)
 ***** SPIN 2 *****
 orbitals (Q,E):
 ---------------
 A :28...38          ( 1.00    -0.3921)  ( 1.00    -0.3844)  ( 1.00    -0.3706)  ( 1.00    -0.3582)
                     ( 1.00    -0.3489)  ( 1.00    -0.3115)  ( 1.00    -0.2456)  ( 1.00    -0.2419)
                     ( 1.00    -0.2048)  ( 1.00    -0.1995)  ( 0.00    -0.1114)
  
 Spin polar: 0 (Spin_A minus Spin_B electrons)

 SCF CONVERGED

 CYCLE   18
 *** Setting up for NEW gradients in Focky
 *** Using FIT density in Focky
 ***** SPIN 1 *****
 orbitals (Q,E):
 ---------------
 A :28...47          ( 1.00    -0.3921)  ( 1.00    -0.3844)  ( 1.00    -0.3706)  ( 1.00    -0.3582)
                     ( 1.00    -0.3489)  ( 1.00    -0.3115)  ( 1.00    -0.2456)  ( 1.00    -0.2419)
                     ( 1.00    -0.2048)  ( 1.00    -0.1995)  ( 0.00    -0.1114)  ( 0.00    -0.0740)
                     ( 0.00    -0.0361)  ( 0.00    -0.0063)  ( 0.00     0.0060)  ( 0.00     0.0234)
                     ( 0.00     0.0292)  ( 0.00     0.0358)  ( 0.00     0.0556)  ( 0.00     0.0646)
 ***** SPIN 2 *****
 orbitals (Q,E):
 ---------------
 A :28...47          ( 1.00    -0.3921)  ( 1.00    -0.3844)  ( 1.00    -0.3706)  ( 1.00    -0.3582)
                     ( 1.00    -0.3489)  ( 1.00    -0.3115)  ( 1.00    -0.2456)  ( 1.00    -0.2419)
                     ( 1.00    -0.2048)  ( 1.00    -0.1995)  ( 0.00    -0.1114)  ( 0.00    -0.0740)
                     ( 0.00    -0.0361)  ( 0.00    -0.0063)  ( 0.00     0.0060)  ( 0.00     0.0234)
                     ( 0.00     0.0292)  ( 0.00     0.0358)  ( 0.00     0.0556)  ( 0.00     0.0646)
  
 Spin polar: 0 (Spin_A minus Spin_B electrons)


 Fit test: (difference of exact and fit density, squared integrated, result summed over spins)
         SCF:                                          0.00001582091858

 Gross Charges per Atom (Z minus electrons)
 ==========================================
            -0.1462    0.0072   -0.0320    0.0653   -0.5458   -0.0204    0.5845   -0.0973    0.3861    0.0632
             0.5621   -0.1692   -0.1462   -0.2190   -0.2922
 Net Total: -0.00000000


 =================================================================
 M U L T I P O L E   D E R I V E D   C H A R G E   A N A L Y S I S
 =================================================================

 See: M. Swart, P.Th. van Duijnen, J.G. Snijders, J.Comput.Chem., (2001), p. 79-88.

 ----------------------------------------------------- 
 MDC atomic charges (includes spinA + spinB electrons)
 ----------------------------------------------------- 

        Atom    Level:     MDC-m        MDC-d        MDC-q
 ---------------------------------------------------------
     1     H           -0.046579    -0.014350    -1.943840
     2     H            0.058589     0.144444    -8.274820
     3     N           -0.048138     0.018257    34.103809
     4     N           -0.021305     0.061137     9.914500
     5     O           -0.393494    -0.495063     3.321782
     6     H            0.045320     0.107262     2.254296
     7     C            0.250507     0.351563   -16.702257
     8     C            0.004457    -0.007149     2.933004
     9     C            0.150759     0.130584     6.160781
    10     C           -0.126674    -0.163172   -31.040395
    11     C            0.219064     0.169641     1.742831
    12     H           -0.021753     0.026497    -8.047592
    13     H           -0.046641    -0.015087    -1.971740
    14     H           -0.062532    -0.058598     3.049297
    15     S            0.038419    -0.255966     4.500344

 -------------------------------- 
 MDC spin density (spinA - spinB)
 -------------------------------- 

        Atom    Level:     MDC-m        MDC-d        MDC-q
 ---------------------------------------------------------
     1     H           -0.000000     0.000000    -0.000000
     2     H            0.000000    -0.000000     0.000000
     3     N            0.000000    -0.000000    -0.000000
     4     N           -0.000000     0.000000     0.000000
     5     O            0.000000     0.000000    -0.000000
     6     H           -0.000000    -0.000000    -0.000000
     7     C            0.000000     0.000000     0.000000
     8     C            0.000000     0.000000    -0.000000
     9     C           -0.000000     0.000000    -0.000000
    10     C            0.000000    -0.000000    -0.000000
    11     C            0.000000     0.000000     0.000000
    12     H           -0.000000    -0.000000    -0.000000
    13     H           -0.000000    -0.000000    -0.000000
    14     H            0.000000     0.000000    -0.000000
    15     S           -0.000000     0.000000     0.000000


 ==========
 S**2 value  ***  see also R. Bulo et al., J.Am.Chem.Soc., 124 (2002) 13903-13910, note (29)  ***
 ==========
  
                                       exact      expectation value

 Total S2 (S squared)                  0.00000            -0.00000


 =======================================
 OCCUPIED-VIRTUAL DIPOLE MATRIX ELEMENTS  ***  (numeric integrals)  ***
 =======================================
  

**************************************************************************
*                                                                        *
*        EXCITATION ENERGY CALCULATION, a part of the ADF-RESPONSE code  *
*                                                                        *
*        RESPONSE, extension of the ADF program for linear and nonlinear *
*        response calculations, by:                                      *
*        S.J.A. van Gisbergen, J.G. Snijders and E.J. Baerends,          *
*                   with contributions by:                               *
*        J.A. Groeneveld, F. Kootstra, and V.P. Osinga                   *
*              version of February 1999, in ADF99                        *
*                                                                        *
*        The most extensive description of the used algorithms is        *
*        given in: S.J.A. van Gisbergen, J.G. Snijders, E.J. Baerends    *
*                  Comp. Phys. Commun. 118 (1999) p.119-138              *
*        and in: S.J.A. van Gisbergen, Ph.D. thesis Amsterdam (1998)     *
*                                                                        *
**************************************************************************


**************************************************************************
*                                                                        *
*             Data for EXCITATION program part                           *
*                                                                        *
* Relevant references are:                                               *
*   S.J.A. van Gisbergen, J.G. Snijders, E.J. Baerends,                  *
*     Comput. Phys. Commun. 118, p.119 (1999)                            *
*   S.J.A. van Gisbergen, F. Kootstra, P.R.T. Schipper, O.V. Gritsenko,  *
*   J. G. Snijders, E.J. Baerends, Phys. Rev. A57 p.2556 (1998)          *
*                                                                        *
*   Ch. Jamorski, M.E. Casida, and D.R. Salahub                          *
*        J. Chem. Phys. 104, p.5134 (1996)                               *
*   R. Bauernschmitt and R. Ahlrichs Chem. Phys. Lett. 256, p.454 (1996) *
*                                                                        *
*   Maximum number of cycles in Davidson part, ndvcyc =              200 *
*                                                                        *
*   The exchange correlation kernel f_xc which is used, is               *
*   Adiabatic LDA, which is frequency-independent.                       *
*                                                                        *
*   Tails of functions are neglected                                     *
*         tailbas =    0.1000000000E-15                                  *
*         tailfit =    0.1000000000E-15                                  *
*   Dipole-allowed irreps are = A                                        *
*                               A                                        *
*                               A                                        *
*                                                                        *
*   Nr of excitation energies per irrep to be calculated                 *
*   Excitations calculated with the davidson method                      *
*       4 of    20054 excitations in irrep A    column   1               *
*                                                                        *
**************************************************************************

 The Clebsch-Gordan series for each direct product
                               A
                         -------
 A * A                        X


**************************************************************************
*****  STARTING CALCULATION OF SPIN-UNRESTRICTED EXCITATION ENERGIES  ******
**************************************************************************


Eigenvalues of small (approximate) problem
   i, eigenvalue(i) in dvdson     1    0.8698832939E-01
   i, eigenvalue(i) in dvdson     2    0.8756983752E-01
   i, eigenvalue(i) in dvdson     3    0.9013850760E-01
   i, eigenvalue(i) in dvdson     4    0.1394907899E+00
Eigenvalues of small (approximate) problem
   i, eigenvalue(i) in dvdson     1    0.8547590333E-01
   i, eigenvalue(i) in dvdson     2    0.8675575372E-01
   i, eigenvalue(i) in dvdson     3    0.8963264663E-01
   i, eigenvalue(i) in dvdson     4    0.1340147577E+00
Eigenvalues of small (approximate) problem
   i, eigenvalue(i) in dvdson     1    0.8543136088E-01
   i, eigenvalue(i) in dvdson     2    0.8675526492E-01
   i, eigenvalue(i) in dvdson     3    0.8962499946E-01
   i, eigenvalue(i) in dvdson     4    0.1334347294E+00
Eigenvalues of small (approximate) problem
   i, eigenvalue(i) in dvdson     1    0.8542978708E-01
   i, eigenvalue(i) in dvdson     2    0.8675526267E-01
   i, eigenvalue(i) in dvdson     3    0.8962429722E-01
   i, eigenvalue(i) in dvdson     4    0.1096472788E+00
Eigenvalues of small (approximate) problem
   i, eigenvalue(i) in dvdson     1    0.8542975032E-01
   i, eigenvalue(i) in dvdson     2    0.8675526266E-01
   i, eigenvalue(i) in dvdson     3    0.8962422139E-01
   i, eigenvalue(i) in dvdson     4    0.1079964114E+00
Eigenvalues of small (approximate) problem
   i, eigenvalue(i) in dvdson     1    0.8542974905E-01
   i, eigenvalue(i) in dvdson     2    0.8675526266E-01
   i, eigenvalue(i) in dvdson     3    0.8962419558E-01
   i, eigenvalue(i) in dvdson     4    0.1077659793E+00
Eigenvalues of small (approximate) problem
   i, eigenvalue(i) in dvdson     1    0.8542974902E-01
   i, eigenvalue(i) in dvdson     2    0.8675526266E-01
   i, eigenvalue(i) in dvdson     3    0.8962418719E-01
   i, eigenvalue(i) in dvdson     4    0.1076472755E+00
Eigenvalues of small (approximate) problem
   i, eigenvalue(i) in dvdson     1    0.8542974902E-01
   i, eigenvalue(i) in dvdson     2    0.8675526266E-01
   i, eigenvalue(i) in dvdson     3    0.8962418565E-01
   i, eigenvalue(i) in dvdson     4    0.1076310264E+00
Eigenvalues of small (approximate) problem
   i, eigenvalue(i) in dvdson     1    0.8542974902E-01
   i, eigenvalue(i) in dvdson     2    0.8675526266E-01
   i, eigenvalue(i) in dvdson     3    0.8962418552E-01
   i, eigenvalue(i) in dvdson     4    0.1076284893E+00


**************************************************************************
*                                                                        *
*   Final excitation energies from Davidson algorithm                    *
*                                                                        *
**************************************************************************

    Number of loops in Davidson routine     =    9                    
    Number of matrix-vector multiplications =   30                    
    Type of excitations = SPIN-UNRESTRICTED                                 
                                                                          

 Symmetry A    

 Excitation energies E in a.u. and eV, dE wrt prev. cycle,
 oscillator strengths f in a.u.

 no.  E/a.u.        E/eV      f           dE/a.u.
 -----------------------------------------------------
   1 0.85430E-01  2.3247     0.98906E-22  0.87E-18
   2 0.86755E-01  2.3607     0.69361E-25  0.26E-17
   3 0.89624E-01  2.4388     0.35627E-04  0.24E-10
   4 0.10763      2.9287     0.39703E-01  0.55E-06
 
 Transition dipole moments mu (x,y,z) in a.u.
 (weak excitations are not printed)

 no.  E/eV          f                       mu (x,y,z)
 ------------------------------------------------------------------
   3  2.4388     0.35627E-04  0.45278E-02 -0.49687E-02  0.23475E-01
   4  2.9287     0.39703E-01  0.74072      0.67584E-01  0.10090E-01
 
                                                        
 Major MO -> MO transitions for the above excitations   
                                                        
    Excitation  Occupied to virtual  Contribution       

     Nr.          orbitals           weight        contributions to     
                                     (sum=1) transition dipole moment   
                                              x       y       z       


     1: Alph  36a     ->  38a        0.4895 -1.2345 -0.2214 -0.0320
     1: Beta  36a     ->  38a        0.4895  1.2345  0.2214  0.0320
     1: Beta  34a     ->  38a        0.0043  0.0700  0.0711  0.0111
     1: Alph  34a     ->  38a        0.0043 -0.0700 -0.0711 -0.0111
     1: Alph  36a     ->  39a        0.0039 -0.1198  0.0516  0.0080
     1: Beta  36a     ->  39a        0.0039  0.1198 -0.0516 -0.0080
     1: Beta  33a     ->  38a        0.0007 -0.0034  0.0296  0.0045
     1: Alph  33a     ->  38a        0.0007  0.0034 -0.0296 -0.0045
     1: Beta  34a     ->  39a        0.0006  0.0260  0.0442  0.0065
     1: Alph  34a     ->  39a        0.0006 -0.0260 -0.0442 -0.0065
     1: Beta  34a     ->  44a        0.0003  0.0041 -0.0025 -0.0002


     2: Beta  37a     ->  38a        0.4990  0.0102 -0.0026  0.0113
     2: Alph  37a     ->  38a        0.4990 -0.0102  0.0026 -0.0113


     3: Alph  37a     ->  38a        0.4990  0.0100 -0.0026  0.0112
     3: Beta  37a     ->  38a        0.4990  0.0100 -0.0026  0.0112


     4: Alph  36a     ->  38a        0.4325  1.0338  0.1854  0.0268
     4: Beta  36a     ->  38a        0.4325  1.0338  0.1854  0.0268
     4: Alph  36a     ->  39a        0.0436 -0.3588  0.1546  0.0240
     4: Beta  36a     ->  39a        0.0436 -0.3588  0.1546  0.0240
     4: Beta  34a     ->  38a        0.0148 -0.1163 -0.1183 -0.0184
     4: Alph  34a     ->  38a        0.0148 -0.1163 -0.1183 -0.0184
     4: Alph  34a     ->  39a        0.0042 -0.0592 -0.1007 -0.0147
     4: Beta  34a     ->  39a        0.0042 -0.0592 -0.1007 -0.0147
     4: Beta  33a     ->  38a        0.0019  0.0048 -0.0423 -0.0064
     4: Alph  33a     ->  38a        0.0019  0.0048 -0.0423 -0.0064
     4: Alph  34a     ->  44a        0.0005 -0.0049  0.0030  0.0002
     4: Beta  34a     ->  44a        0.0005 -0.0049  0.0030  0.0002
     4: Alph  30a     ->  39a        0.0003 -0.0010 -0.0020 -0.0003
     4: Beta  30a     ->  39a        0.0003 -0.0010 -0.0020 -0.0003
     4: Alph  27a     ->  38a        0.0003  0.0008  0.0024  0.0004
     4: Beta  27a     ->  38a        0.0003  0.0008  0.0024  0.0004
     4: Beta  33a     ->  39a        0.0003 -0.0191 -0.0075 -0.0012
     4: Alph  33a     ->  39a        0.0003 -0.0191 -0.0075 -0.0012
     4: Beta  37a     ->  42a        0.0002 -0.0055 -0.0063 -0.0009
     4: Alph  37a     ->  42a        0.0002 -0.0055 -0.0063 -0.0009
 

 All SPIN-UNRESTRICTED excitation energies 

 no.     E/a.u.        E/eV      f           Symmetry
 -----------------------------------------------------
   1:     0.08543      2.32466   0.9891E-22  A           
   2:     0.08676      2.36073   0.6936E-25  A           
   3:     0.08962      2.43880   0.3563E-04  A           
   4:     0.10763      2.92872   0.3970E-01  A           


 Normal termination of EXCITATION program part


 *** Using NEW gradient routines ***

 *** Calculating Gradients of Excitation Energy ***

 Relevent references:
    C. Van Caille and R. D. Amos, Chem. Phys. Lett. 308,249 (1999) and 317,159 (2000)
    F. Furche and R. Ahlrichs, J. Chem. Phys. 117,7433 (2002)
    M. Seth, G. Mazur,  T. Ziegler, Theor. Chem. Acc., 129, 331 (2011) 


   ---Begin solution of CPKS Equations--
   Real perturbation
Iter    5 Error   0.009850
  CPKS converged. Remaining residual is  0.0000601

 *** Finished Excitation Energy Gradients ***


 Geometry CYCLE 3
 ==============

 Energy gradients wrt nuclear displacements
 ==========================================

     Atom      Cartesian (a.u./angstrom)
                 X         Y         Z
 ----------------------------------------
     1 H     0.001404  0.000159  0.000077
     2 H     0.003009  0.002060  0.000438
     3 N    -0.067414 -0.010843 -0.001759
     4 N    -0.045314  0.022090  0.003321
     5 O     0.004183  0.020481  0.003262
     6 H    -0.001508 -0.000417 -0.000031
     7 C     0.036717 -0.035431 -0.005625
     8 C    -0.020385  0.003264  0.000560
     9 C     0.039980  0.000810  0.000236
    10 C     0.044557 -0.003022 -0.000474
    11 C    -0.002886 -0.002458 -0.000444
    12 H    -0.000526  0.001371  0.000164
    13 H     0.001401  0.000207  0.000045
    14 H     0.000774  0.000393  0.000079
    15 S     0.006009  0.001337  0.000149
 ----------------------------------------

 dE(predicted):    -0.59663E-02, dE(actual):    -0.79252E-02, Trust radius:    0.774597, all in a.u.
 
----------------------------------------------------------------------
Geometry Convergence after Step   3       (Hartree/Angstrom,Angstrom)
----------------------------------------------------------------------
current energy                               -3.37876446 Hartree
energy change                      -0.00792518     0.00100000    F
constrained gradient max            0.06741444     0.00100000    F
constrained gradient rms            0.01788614     0.00066667    F
gradient max                        0.06741444
gradient rms                        0.01788614
cart. step max                      0.03387921     0.01000000    F
cart. step rms                      0.01490175     0.00666667    F
 


 Coordinates (Cartesian)
 =======================

     Atom                    bohr                                 angstrom                 Geometric Variables
                   X           Y           Z              X           Y           Z       (0:frozen, *:LT par.)
 --------------------------------------------------------------------------------------------------------------
     1 H      -5.191770    0.280199   -1.668062      -2.747366    0.148275   -0.882700      1       2       3
     2 H       2.687545   -4.324918   -0.626218       1.422188   -2.288648   -0.331380      4       5       6
     3 N       2.018315   -2.542226   -0.355928       1.068046   -1.345288   -0.188349      7       8       9
     4 N       2.866270    1.621565    0.252973       1.516765    0.858095    0.133867     10      11      12
     5 O      -2.003796   -4.129408   -0.610284      -1.060363   -2.185189   -0.322948     13      14      15
     6 H       4.238417    2.957964    0.450655       2.242874    1.565287    0.238477     16      17      18
     7 C      -0.704372   -2.219175   -0.315209      -0.372738   -1.174337   -0.166801     19      20      21
     8 C      -1.516855    0.314073    0.047345      -0.802685    0.166200    0.025054     22      23      24
     9 C       0.340393    2.298098    0.352340       0.180128    1.216101    0.186450     25      26      27
    10 C       3.722199   -0.670124   -0.087328       1.969703   -0.354615   -0.046212     28      29      30
    11 C      -4.269157    0.875520    0.100885      -2.259141    0.463305    0.053386     31      32      33
    12 H      -0.086484    4.276364    0.647794      -0.045765    2.262954    0.342798     34      35      36
    13 H      -5.228390   -0.202422    1.601524      -2.766745   -0.107117    0.847490     37      38      39
    14 H      -4.634320    2.893198    0.393752      -2.452377    1.531014    0.208364     40      41      42
    15 S       6.950364   -1.266197   -0.198978       3.677974   -0.670043   -0.105295     43      44      45
 --------------------------------------------------------------------------------------------------------------

 Number of elements of the density matrix on this node (used, total):      4395     61425


 ===========================================
 Numerical Integration : Fuzzy Cells (Becke)
 ===========================================
  
 Becke grid quality: GOOD           
  
 Lebedev angular grid order:             min:  11 max:  31
 Nr. of radial points:                   min:  54 max:  72

 Total nr. of points:     191044
 Nr. of blocks:             1493
 Block length:               128
 Nr. of dummy points:         60


 Test of Precision of the Numerical Integration Grid
 ===================================================

 Integral of the Total Core Density:                   0.00000000000000


 ========================
 Density Fitting (zlmFit)
 ========================
  
 ZlmFit Fit Quality: GOOD           
  
 Max L-expansion:                        min:   8 max:   9
 Nr. of radial interpolation points:     min:  78 max: 108


 =====
 S C F  ***  ScaSCF  ***
 =====
  
 Initial density matrix is taken from previous geometry

 CYCLE    1
 SCF Error: norm([F,P])=      0.278489648874, max([F,P])=      0.036986346943
 ***** SPIN 1 *****
 orbitals (Q,E):
 ---------------
 A :28...47          ( 1.00    -0.3938)  ( 1.00    -0.3861)  ( 1.00    -0.3691)  ( 1.00    -0.3607)
                     ( 1.00    -0.3447)  ( 1.00    -0.3120)  ( 1.00    -0.2463)  ( 1.00    -0.2445)
                     ( 1.00    -0.2040)  ( 1.00    -0.1991)  ( 0.00    -0.1142)  ( 0.00    -0.0655)
                     ( 0.00    -0.0358)  ( 0.00    -0.0071)  ( 0.00     0.0063)  ( 0.00     0.0255)
                     ( 0.00     0.0296)  ( 0.00     0.0357)  ( 0.00     0.0550)  ( 0.00     0.0648)
 ***** SPIN 2 *****
 orbitals (Q,E):
 ---------------
 A :28...47          ( 1.00    -0.3938)  ( 1.00    -0.3861)  ( 1.00    -0.3691)  ( 1.00    -0.3607)
                     ( 1.00    -0.3447)  ( 1.00    -0.3120)  ( 1.00    -0.2463)  ( 1.00    -0.2445)
                     ( 1.00    -0.2040)  ( 1.00    -0.1991)  ( 0.00    -0.1142)  ( 0.00    -0.0655)
                     ( 0.00    -0.0358)  ( 0.00    -0.0071)  ( 0.00     0.0063)  ( 0.00     0.0255)
                     ( 0.00     0.0296)  ( 0.00     0.0357)  ( 0.00     0.0550)  ( 0.00     0.0648)
  
 Spin polar: 0 (Spin_A minus Spin_B electrons)

 CYCLE    2
   MIX coefficients:  0.8000  0.2000
 SCF Error: norm([F,P])=      0.086473917142, max([F,P])=      0.010093043184
 ***** SPIN 1 *****
 orbitals (Q,E):
 ---------------
 A :28...38          ( 1.00    -0.3958)  ( 1.00    -0.3876)  ( 1.00    -0.3706)  ( 1.00    -0.3620)
                     ( 1.00    -0.3435)  ( 1.00    -0.3143)  ( 1.00    -0.2481)  ( 1.00    -0.2451)
                     ( 1.00    -0.2019)  ( 1.00    -0.1956)  ( 0.00    -0.1161)
 ***** SPIN 2 *****
 orbitals (Q,E):
 ---------------
 A :28...38          ( 1.00    -0.3958)  ( 1.00    -0.3876)  ( 1.00    -0.3706)  ( 1.00    -0.3620)
                     ( 1.00    -0.3435)  ( 1.00    -0.3143)  ( 1.00    -0.2481)  ( 1.00    -0.2451)
                     ( 1.00    -0.2019)  ( 1.00    -0.1956)  ( 0.00    -0.1161)
  
 Spin polar: 0 (Spin_A minus Spin_B electrons)

 CYCLE    3
  SDIIS (wt  0.000): -0.2869  1.2869
 A-DIIS (wt  1.000):  0.0000  1.0000
  DIIS coefficients:  0.0000  1.0000
 SCF Error: norm([F,P])=      0.029787689333, max([F,P])=      0.002625337528
 ***** SPIN 1 *****
 orbitals (Q,E):
 ---------------
 A :28...38          ( 1.00    -0.3976)  ( 1.00    -0.3894)  ( 1.00    -0.3712)  ( 1.00    -0.3639)
                     ( 1.00    -0.3410)  ( 1.00    -0.3159)  ( 1.00    -0.2501)  ( 1.00    -0.2462)
                     ( 1.00    -0.1983)  ( 1.00    -0.1905)  ( 0.00    -0.1178)
 ***** SPIN 2 *****
 orbitals (Q,E):
 ---------------
 A :28...38          ( 1.00    -0.3976)  ( 1.00    -0.3894)  ( 1.00    -0.3712)  ( 1.00    -0.3639)
                     ( 1.00    -0.3410)  ( 1.00    -0.3159)  ( 1.00    -0.2501)  ( 1.00    -0.2462)
                     ( 1.00    -0.1983)  ( 1.00    -0.1905)  ( 0.00    -0.1178)
  
 Spin polar: 0 (Spin_A minus Spin_B electrons)

 CYCLE    4
  SDIIS (wt  0.000):  0.2236  0.3050  0.4714
 A-DIIS (wt  1.000):  0.0000  0.7724  0.2276
  DIIS coefficients:  0.0000  0.7724  0.2276
 SCF Error: norm([F,P])=      0.057517732705, max([F,P])=      0.006668480787
 ***** SPIN 1 *****
 orbitals (Q,E):
 ---------------
 A :28...38          ( 1.00    -0.3962)  ( 1.00    -0.3882)  ( 1.00    -0.3702)  ( 1.00    -0.3628)
                     ( 1.00    -0.3419)  ( 1.00    -0.3145)  ( 1.00    -0.2486)  ( 1.00    -0.2448)
                     ( 1.00    -0.1999)  ( 1.00    -0.1931)  ( 0.00    -0.1166)
 ***** SPIN 2 *****
 orbitals (Q,E):
 ---------------
 A :28...38          ( 1.00    -0.3962)  ( 1.00    -0.3882)  ( 1.00    -0.3702)  ( 1.00    -0.3628)
                     ( 1.00    -0.3419)  ( 1.00    -0.3145)  ( 1.00    -0.2486)  ( 1.00    -0.2448)
                     ( 1.00    -0.1999)  ( 1.00    -0.1931)  ( 0.00    -0.1166)
  
 Spin polar: 0 (Spin_A minus Spin_B electrons)

 CYCLE    5
  SDIIS (wt  1.000): -0.1007  0.4127 -0.1070  0.7950
  DIIS coefficients: -0.1007  0.4127 -0.1070  0.7950
 SCF Error: norm([F,P])=      0.013480514489, max([F,P])=      0.000893399597
 ***** SPIN 1 *****
 orbitals (Q,E):
 ---------------
 A :28...38          ( 1.00    -0.3967)  ( 1.00    -0.3884)  ( 1.00    -0.3711)  ( 1.00    -0.3629)
                     ( 1.00    -0.3422)  ( 1.00    -0.3150)  ( 1.00    -0.2490)  ( 1.00    -0.2458)
                     ( 1.00    -0.2003)  ( 1.00    -0.1935)  ( 0.00    -0.1169)
 ***** SPIN 2 *****
 orbitals (Q,E):
 ---------------
 A :28...38          ( 1.00    -0.3967)  ( 1.00    -0.3884)  ( 1.00    -0.3711)  ( 1.00    -0.3629)
                     ( 1.00    -0.3422)  ( 1.00    -0.3150)  ( 1.00    -0.2490)  ( 1.00    -0.2458)
                     ( 1.00    -0.2003)  ( 1.00    -0.1935)  ( 0.00    -0.1169)
  
 Spin polar: 0 (Spin_A minus Spin_B electrons)

 CYCLE    6
  SDIIS (wt  1.000): -0.0857  0.2696 -0.1240  0.6121  0.3279
  DIIS coefficients: -0.0857  0.2696 -0.1240  0.6121  0.3279
 SCF Error: norm([F,P])=      0.006937087359, max([F,P])=      0.000520594467
 ***** SPIN 1 *****
 orbitals (Q,E):
 ---------------
 A :28...38          ( 1.00    -0.3963)  ( 1.00    -0.3882)  ( 1.00    -0.3707)  ( 1.00    -0.3627)
                     ( 1.00    -0.3424)  ( 1.00    -0.3148)  ( 1.00    -0.2487)  ( 1.00    -0.2452)
                     ( 1.00    -0.2005)  ( 1.00    -0.1937)  ( 0.00    -0.1168)
 ***** SPIN 2 *****
 orbitals (Q,E):
 ---------------
 A :28...38          ( 1.00    -0.3963)  ( 1.00    -0.3882)  ( 1.00    -0.3707)  ( 1.00    -0.3627)
                     ( 1.00    -0.3424)  ( 1.00    -0.3148)  ( 1.00    -0.2487)  ( 1.00    -0.2452)
                     ( 1.00    -0.2005)  ( 1.00    -0.1937)  ( 0.00    -0.1168)
  
 Spin polar: 0 (Spin_A minus Spin_B electrons)

 CYCLE    7
  SDIIS (wt  1.000): -0.0487  0.1508 -0.0806  0.3731  0.2336  0.3718
  DIIS coefficients: -0.0487  0.1508 -0.0806  0.3731  0.2336  0.3718
 SCF Error: norm([F,P])=      0.001907457132, max([F,P])=      0.000183446775
 ***** SPIN 1 *****
 orbitals (Q,E):
 ---------------
 A :28...38          ( 1.00    -0.3963)  ( 1.00    -0.3882)  ( 1.00    -0.3706)  ( 1.00    -0.3627)
                     ( 1.00    -0.3424)  ( 1.00    -0.3147)  ( 1.00    -0.2487)  ( 1.00    -0.2451)
                     ( 1.00    -0.2005)  ( 1.00    -0.1937)  ( 0.00    -0.1167)
 ***** SPIN 2 *****
 orbitals (Q,E):
 ---------------
 A :28...38          ( 1.00    -0.3963)  ( 1.00    -0.3882)  ( 1.00    -0.3706)  ( 1.00    -0.3627)
                     ( 1.00    -0.3424)  ( 1.00    -0.3147)  ( 1.00    -0.2487)  ( 1.00    -0.2451)
                     ( 1.00    -0.2005)  ( 1.00    -0.1937)  ( 0.00    -0.1167)
  
 Spin polar: 0 (Spin_A minus Spin_B electrons)

 CYCLE    8
  SDIIS (wt  1.000): -0.0182  0.0588 -0.0347  0.1572  0.1050  0.2536  0.4783
  DIIS coefficients: -0.0182  0.0588 -0.0347  0.1572  0.1050  0.2536  0.4783
 SCF Error: norm([F,P])=      0.000578101804, max([F,P])=      0.000062757038
 ***** SPIN 1 *****
 orbitals (Q,E):
 ---------------
 A :28...38          ( 1.00    -0.3963)  ( 1.00    -0.3881)  ( 1.00    -0.3706)  ( 1.00    -0.3626)
                     ( 1.00    -0.3424)  ( 1.00    -0.3147)  ( 1.00    -0.2486)  ( 1.00    -0.2451)
                     ( 1.00    -0.2005)  ( 1.00    -0.1937)  ( 0.00    -0.1167)
 ***** SPIN 2 *****
 orbitals (Q,E):
 ---------------
 A :28...38          ( 1.00    -0.3963)  ( 1.00    -0.3881)  ( 1.00    -0.3706)  ( 1.00    -0.3626)
                     ( 1.00    -0.3424)  ( 1.00    -0.3147)  ( 1.00    -0.2486)  ( 1.00    -0.2451)
                     ( 1.00    -0.2005)  ( 1.00    -0.1937)  ( 0.00    -0.1167)
  
 Spin polar: 0 (Spin_A minus Spin_B electrons)

 CYCLE    9
  SDIIS (wt  1.000): -0.0055  0.0186 -0.0117  0.0527  0.0388  0.1142  0.3064  0.4866
  DIIS coefficients: -0.0055  0.0186 -0.0117  0.0527  0.0388  0.1142  0.3064  0.4866
 SCF Error: norm([F,P])=      0.000198541284, max([F,P])=      0.000014049029
 ***** SPIN 1 *****
 orbitals (Q,E):
 ---------------
 A :28...38          ( 1.00    -0.3963)  ( 1.00    -0.3881)  ( 1.00    -0.3706)  ( 1.00    -0.3627)
                     ( 1.00    -0.3424)  ( 1.00    -0.3147)  ( 1.00    -0.2487)  ( 1.00    -0.2451)
                     ( 1.00    -0.2005)  ( 1.00    -0.1937)  ( 0.00    -0.1167)
 ***** SPIN 2 *****
 orbitals (Q,E):
 ---------------
 A :28...38          ( 1.00    -0.3963)  ( 1.00    -0.3881)  ( 1.00    -0.3706)  ( 1.00    -0.3627)
                     ( 1.00    -0.3424)  ( 1.00    -0.3147)  ( 1.00    -0.2487)  ( 1.00    -0.2451)
                     ( 1.00    -0.2005)  ( 1.00    -0.1937)  ( 0.00    -0.1167)
  
 Spin polar: 0 (Spin_A minus Spin_B electrons)

 CYCLE   10
  SDIIS (wt  1.000): -0.0021  0.0070 -0.0043  0.0195  0.0159  0.0490  0.1423  0.3139  0.4587
  DIIS coefficients: -0.0021  0.0070 -0.0043  0.0195  0.0159  0.0490  0.1423  0.3139  0.4587
 SCF Error: norm([F,P])=      0.000077064759, max([F,P])=      0.000006142995
 ***** SPIN 1 *****
 orbitals (Q,E):
 ---------------
 A :28...38          ( 1.00    -0.3963)  ( 1.00    -0.3881)  ( 1.00    -0.3706)  ( 1.00    -0.3627)
                     ( 1.00    -0.3424)  ( 1.00    -0.3147)  ( 1.00    -0.2487)  ( 1.00    -0.2451)
                     ( 1.00    -0.2005)  ( 1.00    -0.1937)  ( 0.00    -0.1167)
 ***** SPIN 2 *****
 orbitals (Q,E):
 ---------------
 A :28...38          ( 1.00    -0.3963)  ( 1.00    -0.3881)  ( 1.00    -0.3706)  ( 1.00    -0.3627)
                     ( 1.00    -0.3424)  ( 1.00    -0.3147)  ( 1.00    -0.2487)  ( 1.00    -0.2451)
                     ( 1.00    -0.2005)  ( 1.00    -0.1937)  ( 0.00    -0.1167)
  
 Spin polar: 0 (Spin_A minus Spin_B electrons)

 CYCLE   11
  SDIIS (wt  1.000): -0.0007  0.0025 -0.0014  0.0066  0.0060  0.0180  0.0518  0.1277  0.2281  0.5615
  DIIS coefficients: -0.0007  0.0025 -0.0014  0.0066  0.0060  0.0180  0.0518  0.1277  0.2281  0.5615
 SCF Error: norm([F,P])=      0.000015508161, max([F,P])=      0.000001187932
 ***** SPIN 1 *****
 orbitals (Q,E):
 ---------------
 A :28...38          ( 1.00    -0.3963)  ( 1.00    -0.3881)  ( 1.00    -0.3706)  ( 1.00    -0.3627)
                     ( 1.00    -0.3424)  ( 1.00    -0.3147)  ( 1.00    -0.2487)  ( 1.00    -0.2451)
                     ( 1.00    -0.2005)  ( 1.00    -0.1937)  ( 0.00    -0.1167)
 ***** SPIN 2 *****
 orbitals (Q,E):
 ---------------
 A :28...38          ( 1.00    -0.3963)  ( 1.00    -0.3881)  ( 1.00    -0.3706)  ( 1.00    -0.3627)
                     ( 1.00    -0.3424)  ( 1.00    -0.3147)  ( 1.00    -0.2487)  ( 1.00    -0.2451)
                     ( 1.00    -0.2005)  ( 1.00    -0.1937)  ( 0.00    -0.1167)
  
 Spin polar: 0 (Spin_A minus Spin_B electrons)

 CYCLE   12
  SDIIS (wt  1.000):  0.0001  0.0000  0.0001  0.0007  0.0024  0.0071  0.0238  0.0554  0.3300  0.5804
  DIIS coefficients:  0.0001  0.0000  0.0001  0.0007  0.0024  0.0071  0.0238  0.0554  0.3300  0.5804
 SCF Error: norm([F,P])=      0.000005554806, max([F,P])=      0.000000390062
 ***** SPIN 1 *****
 orbitals (Q,E):
 ---------------
 A :28...38          ( 1.00    -0.3963)  ( 1.00    -0.3881)  ( 1.00    -0.3706)  ( 1.00    -0.3627)
                     ( 1.00    -0.3424)  ( 1.00    -0.3147)  ( 1.00    -0.2487)  ( 1.00    -0.2451)
                     ( 1.00    -0.2005)  ( 1.00    -0.1937)  ( 0.00    -0.1167)
 ***** SPIN 2 *****
 orbitals (Q,E):
 ---------------
 A :28...38          ( 1.00    -0.3963)  ( 1.00    -0.3881)  ( 1.00    -0.3706)  ( 1.00    -0.3627)
                     ( 1.00    -0.3424)  ( 1.00    -0.3147)  ( 1.00    -0.2487)  ( 1.00    -0.2451)
                     ( 1.00    -0.2005)  ( 1.00    -0.1937)  ( 0.00    -0.1167)
  
 Spin polar: 0 (Spin_A minus Spin_B electrons)

 CYCLE   13
  SDIIS (wt  1.000):  0.0000  0.0000  0.0002  0.0007  0.0016  0.0049  0.0133  0.1357  0.3151  0.5286
  DIIS coefficients:  0.0000  0.0000  0.0002  0.0007  0.0016  0.0049  0.0133  0.1357  0.3151  0.5286
 SCF Error: norm([F,P])=      0.000002023808, max([F,P])=      0.000000159104
 ***** SPIN 1 *****
 orbitals (Q,E):
 ---------------
 A :28...38          ( 1.00    -0.3963)  ( 1.00    -0.3881)  ( 1.00    -0.3706)  ( 1.00    -0.3627)
                     ( 1.00    -0.3424)  ( 1.00    -0.3147)  ( 1.00    -0.2487)  ( 1.00    -0.2451)
                     ( 1.00    -0.2005)  ( 1.00    -0.1937)  ( 0.00    -0.1167)
 ***** SPIN 2 *****
 orbitals (Q,E):
 ---------------
 A :28...38          ( 1.00    -0.3963)  ( 1.00    -0.3881)  ( 1.00    -0.3706)  ( 1.00    -0.3627)
                     ( 1.00    -0.3424)  ( 1.00    -0.3147)  ( 1.00    -0.2487)  ( 1.00    -0.2451)
                     ( 1.00    -0.2005)  ( 1.00    -0.1937)  ( 0.00    -0.1167)
  
 Spin polar: 0 (Spin_A minus Spin_B electrons)

 CYCLE   14
  SDIIS (wt  1.000):  0.0000  0.0001  0.0005  0.0014  0.0032  0.0066  0.0711  0.1841  0.3881  0.3448
  DIIS coefficients:  0.0000  0.0001  0.0005  0.0014  0.0032  0.0066  0.0711  0.1841  0.3881  0.3448
 SCF Error: norm([F,P])=      0.000001430572, max([F,P])=      0.000000162324
 ***** SPIN 1 *****
 orbitals (Q,E):
 ---------------
 A :28...38          ( 1.00    -0.3963)  ( 1.00    -0.3881)  ( 1.00    -0.3706)  ( 1.00    -0.3627)
                     ( 1.00    -0.3424)  ( 1.00    -0.3147)  ( 1.00    -0.2487)  ( 1.00    -0.2451)
                     ( 1.00    -0.2005)  ( 1.00    -0.1937)  ( 0.00    -0.1167)
 ***** SPIN 2 *****
 orbitals (Q,E):
 ---------------
 A :28...38          ( 1.00    -0.3963)  ( 1.00    -0.3881)  ( 1.00    -0.3706)  ( 1.00    -0.3627)
                     ( 1.00    -0.3424)  ( 1.00    -0.3147)  ( 1.00    -0.2487)  ( 1.00    -0.2451)
                     ( 1.00    -0.2005)  ( 1.00    -0.1937)  ( 0.00    -0.1167)
  
 Spin polar: 0 (Spin_A minus Spin_B electrons)

 CYCLE   15
  SDIIS (wt  1.000):  0.0000  0.0002  0.0005  0.0009  0.0018  0.0262  0.0734  0.1868  0.2130  0.4973
  DIIS coefficients:  0.0000  0.0002  0.0005  0.0009  0.0018  0.0262  0.0734  0.1868  0.2130  0.4973
 SCF Error: norm([F,P])=      0.000000261997, max([F,P])=      0.000000018574
 ***** SPIN 1 *****
 orbitals (Q,E):
 ---------------
 A :28...38          ( 1.00    -0.3963)  ( 1.00    -0.3881)  ( 1.00    -0.3706)  ( 1.00    -0.3627)
                     ( 1.00    -0.3424)  ( 1.00    -0.3147)  ( 1.00    -0.2487)  ( 1.00    -0.2451)
                     ( 1.00    -0.2005)  ( 1.00    -0.1937)  ( 0.00    -0.1167)
 ***** SPIN 2 *****
 orbitals (Q,E):
 ---------------
 A :28...38          ( 1.00    -0.3963)  ( 1.00    -0.3881)  ( 1.00    -0.3706)  ( 1.00    -0.3627)
                     ( 1.00    -0.3424)  ( 1.00    -0.3147)  ( 1.00    -0.2487)  ( 1.00    -0.2451)
                     ( 1.00    -0.2005)  ( 1.00    -0.1937)  ( 0.00    -0.1167)
  
 Spin polar: 0 (Spin_A minus Spin_B electrons)

 CYCLE   16
  SDIIS (wt  1.000):  0.0000  0.0000 -0.0001 -0.0001  0.0042  0.0153  0.0509  0.0597  0.2729  0.5972
  DIIS coefficients:  0.0000  0.0000 -0.0001 -0.0001  0.0042  0.0153  0.0509  0.0597  0.2729  0.5972
 SCF Error: norm([F,P])=      0.000000078477, max([F,P])=      0.000000004891
 ***** SPIN 1 *****
 orbitals (Q,E):
 ---------------
 A :28...38          ( 1.00    -0.3963)  ( 1.00    -0.3881)  ( 1.00    -0.3706)  ( 1.00    -0.3627)
                     ( 1.00    -0.3424)  ( 1.00    -0.3147)  ( 1.00    -0.2487)  ( 1.00    -0.2451)
                     ( 1.00    -0.2005)  ( 1.00    -0.1937)  ( 0.00    -0.1167)
 ***** SPIN 2 *****
 orbitals (Q,E):
 ---------------
 A :28...38          ( 1.00    -0.3963)  ( 1.00    -0.3881)  ( 1.00    -0.3706)  ( 1.00    -0.3627)
                     ( 1.00    -0.3424)  ( 1.00    -0.3147)  ( 1.00    -0.2487)  ( 1.00    -0.2451)
                     ( 1.00    -0.2005)  ( 1.00    -0.1937)  ( 0.00    -0.1167)
  
 Spin polar: 0 (Spin_A minus Spin_B electrons)

 SCF CONVERGED

 CYCLE   17
 *** Setting up for NEW gradients in Focky
 *** Using FIT density in Focky
 ***** SPIN 1 *****
 orbitals (Q,E):
 ---------------
 A :28...47          ( 1.00    -0.3963)  ( 1.00    -0.3881)  ( 1.00    -0.3706)  ( 1.00    -0.3627)
                     ( 1.00    -0.3424)  ( 1.00    -0.3147)  ( 1.00    -0.2487)  ( 1.00    -0.2451)
                     ( 1.00    -0.2005)  ( 1.00    -0.1937)  ( 0.00    -0.1167)  ( 0.00    -0.0676)
                     ( 0.00    -0.0369)  ( 0.00    -0.0084)  ( 0.00     0.0059)  ( 0.00     0.0267)
                     ( 0.00     0.0278)  ( 0.00     0.0357)  ( 0.00     0.0539)  ( 0.00     0.0635)
 ***** SPIN 2 *****
 orbitals (Q,E):
 ---------------
 A :28...47          ( 1.00    -0.3963)  ( 1.00    -0.3881)  ( 1.00    -0.3706)  ( 1.00    -0.3627)
                     ( 1.00    -0.3424)  ( 1.00    -0.3147)  ( 1.00    -0.2487)  ( 1.00    -0.2451)
                     ( 1.00    -0.2005)  ( 1.00    -0.1937)  ( 0.00    -0.1167)  ( 0.00    -0.0676)
                     ( 0.00    -0.0369)  ( 0.00    -0.0084)  ( 0.00     0.0059)  ( 0.00     0.0267)
                     ( 0.00     0.0278)  ( 0.00     0.0357)  ( 0.00     0.0539)  ( 0.00     0.0635)
  
 Spin polar: 0 (Spin_A minus Spin_B electrons)


 Fit test: (difference of exact and fit density, squared integrated, result summed over spins)
         SCF:                                          0.00001600633949

 Gross Charges per Atom (Z minus electrons)
 ==========================================
            -0.1450    0.0092   -0.0260    0.0767   -0.5391   -0.0229    0.5778   -0.0895    0.3832    0.0732
             0.5593   -0.1688   -0.1454   -0.2173   -0.3255
 Net Total: -0.00000000


 =================================================================
 M U L T I P O L E   D E R I V E D   C H A R G E   A N A L Y S I S
 =================================================================

 See: M. Swart, P.Th. van Duijnen, J.G. Snijders, J.Comput.Chem., (2001), p. 79-88.

 ----------------------------------------------------- 
 MDC atomic charges (includes spinA + spinB electrons)
 ----------------------------------------------------- 

        Atom    Level:     MDC-m        MDC-d        MDC-q
 ---------------------------------------------------------
     1     H           -0.046278    -0.012802    -1.067473
     2     H            0.058720     0.159185    -2.968055
     3     N           -0.049613    -0.015929    12.168304
     4     N           -0.018210     0.077267     0.706566
     5     O           -0.387667    -0.484829    -2.733383
     6     H            0.045047     0.100187     3.547720
     7     C            0.254412     0.358318     4.905625
     8     C            0.007447    -0.003051    -3.844380
     9     C            0.156386     0.133912     6.380232
    10     C           -0.126884    -0.147824   -17.006675
    11     C            0.219037     0.167756     0.737211
    12     H           -0.020388     0.027712    -4.689046
    13     H           -0.046452    -0.015309    -1.112279
[truncated: 553,179 more chars]
