# Supplementary material for: Spin Orbit Coupling in Orthogonal Charge Transfer States: (TD-)DFT of Pyrene - Dimethylaniline
Source: Preprints.org preprint supplement (doi:10.20944/preprints202112.0109.v2), 2021-12-16
Supplement: Supplementary file 3 [file supplementary › Supporting INFO-14-12-2021/Coordinate files/4-thiothymine-B/PBE/S2/4-thio-thymine-S2-PBE.mol]

4-thio-thymine-S2-PBE
SCM ADF package: www.scm.com

 15 15  0  0  0  0  0  0  0  0999 V2000
   -2.7812    0.1718   -0.8759 H   0  0  0  0  0  0  0  0  0  0  0  0
    1.4072   -2.2729   -0.3290 H   0  0  0  0  0  0  0  0  0  0  0  0
    1.1050   -1.3136   -0.1885 N   0  0  0  0  0  0  0  0  0  0  0  0
    1.5287    0.8941    0.1348 N   0  0  0  0  0  0  0  0  0  0  0  0
   -1.0407   -2.2105   -0.3269 O   0  0  0  0  0  0  0  0  0  0  0  0
    2.1908    1.6490    0.2439 H   0  0  0  0  0  0  0  0  0  0  0  0
   -0.4166   -1.1540   -0.1676 C   0  0  0  0  0  0  0  0  0  0  0  0
   -0.8167    0.1762    0.0259 C   0  0  0  0  0  0  0  0  0  0  0  0
    0.1146    1.2114    0.1830 C   0  0  0  0  0  0  0  0  0  0  0  0
    1.9749   -0.3353   -0.0471 C   0  0  0  0  0  0  0  0  0  0  0  0
   -2.2924    0.4725    0.0627 C   0  0  0  0  0  0  0  0  0  0  0  0
   -0.1189    2.2568    0.3364 H   0  0  0  0  0  0  0  0  0  0  0  0
   -2.7905   -0.0880    0.8676 H   0  0  0  0  0  0  0  0  0  0  0  0
   -2.4772    1.5430    0.2210 H   0  0  0  0  0  0  0  0  0  0  0  0
    3.7106   -0.7121   -0.1069 S   0  0  0  0  0  0  0  0  0  0  0  0
  5  7  2  0
  3 10  1  0
  4 10  1  0
  8 11  1  0
  8  9  2  0
  7  8  1  0
  4  6  1  0
  9 12  1  0
  2  3  1  0
 11 14  1  0
 11 13  1  0
  1 11  1  0
  4  9  1  0
  3  7  1  0
 10 15  2  0
M  END
