# Supplementary material for: Spin Orbit Coupling in Orthogonal Charge Transfer States: (TD-)DFT of Pyrene - Dimethylaniline
Source: Preprints.org preprint supplement (doi:10.20944/preprints202112.0109.v2), 2021-12-16
Supplement: Supplementary file 3 [file supplementary › Supporting INFO-14-12-2021/Coordinate files/4-thiothymine-B/PBE/T1/4-thio-thymine-T1-PBE.mol]

4-thio-thymine-T1-PBE
SCM ADF package: www.scm.com

 15 15  0  0  0  0  0  0  0  0999 V2000
   -2.3928    1.2222   -0.9147 H   0  0  0  0  0  0  0  0  0  0  0  0
    1.3967   -2.3310   -0.1619 H   0  0  0  0  0  0  0  0  0  0  0  0
    1.0605   -1.3865    0.0065 N   0  0  0  0  0  0  0  0  0  0  0  0
    1.5070    0.8801    0.1325 N   0  0  0  0  0  0  0  0  0  0  0  0
   -1.0666   -2.1940   -0.3225 O   0  0  0  0  0  0  0  0  0  0  0  0
    2.2252    1.6020    0.1514 H   0  0  0  0  0  0  0  0  0  0  0  0
   -0.3580   -1.2035   -0.1135 C   0  0  0  0  0  0  0  0  0  0  0  0
   -0.8000    0.1500    0.0285 C   0  0  0  0  0  0  0  0  0  0  0  0
    0.1916    1.2090    0.2812 C   0  0  0  0  0  0  0  0  0  0  0  0
    2.0004   -0.3800   -0.0213 C   0  0  0  0  0  0  0  0  0  0  0  0
   -2.2289    0.4988   -0.0946 C   0  0  0  0  0  0  0  0  0  0  0  0
   -0.0588    2.2568    0.4013 H   0  0  0  0  0  0  0  0  0  0  0  0
   -2.8287   -0.3990   -0.2785 H   0  0  0  0  0  0  0  0  0  0  0  0
   -2.5914    1.0003    0.8220 H   0  0  0  0  0  0  0  0  0  0  0  0
    3.6519   -0.6489   -0.1882 S   0  0  0  0  0  0  0  0  0  0  0  0
  5  7  2  0
  8 11  1  0
  4 10  1  0
  4  9  1  0
  3 10  1  0
  7  8  1  0
  9 12  1  0
  2  3  1  0
  4  6  1  0
 11 13  1  0
  8  9  2  0
  3  7  1  0
  1 11  1  0
 11 14  1  0
 10 15  2  0
M  END
