# Supplementary material for: Spin Orbit Coupling in Orthogonal Charge Transfer States: (TD-)DFT of Pyrene - Dimethylaniline
Source: Preprints.org preprint supplement (doi:10.20944/preprints202112.0109.v2), 2021-12-16
Supplement: Supplementary file 3 [file supplementary › Supporting INFO-14-12-2021/Coordinate files/4-thiothymine-B/PBE/T1/4-thio-thymine-T1.out]

 *******************************************************************************
 *                                                                             *
 *  -------------------------------------                                      *
 *   Amsterdam Density Functional  (ADF)         2017                          *
 *  -------------------------------------                                      *
 *                                               r58813 2017-04-12             *
 *                                                                             *
 *                                                                             *
 *                            =====================                            *
 *                            |                   |                            *
 *                            |     D I R A C     |                            *
 *                            |                   |                            *
 *                            =====================                            *
 *                                                                             *
 *                                                                             *
 *   Online information and documentation:  https://www.scm.com/support/       *
 *   E-mail:  support@scm.com   info@scm.com                                   *
 *                                                                             *
 *   Scientific publications using ADF results must be properly referenced     *
 *   See the User Manuals (or the web site) for recommended citations          *
 *   The terms and conditions of the End User License Agreement apply to       *
 *   the use of ADF, https://www.scm.com/license-terms/                        *
 *                                                                             *
 **********************  x86_64_linux_intel / intelmpi  ************************
 
 Licensed to: SURF-SARA, Comp. & Networking Services / Amsterdam / NL
 SCM User ID: u7409
  
 DIRAC 2017  RunTime: Dec10-2020 14:08:02  Nodes: 1  Procs: 1

 Temporary files are created in /scratch/kid_0.7tbvSv

1
 HYDROGEN ATOM RELATIVISTIC, Point Nuc, A and c from libtc   
 N J RN H ZN XION ANUC CLIGHT
 5000    1100.00000000197.36710137  1.00000000  0.00000000    1.007825  0.1370360E+03
  PH   PHI     EPS        DEL        DELRVR
  0.30  0.30     2500.00  0.00001000  0.00001000
 IDIRC  NC1  NDEBU NPRIN  IPUN IRCOR IWCOR
   1   300     0     0     0     0     0
   XALPHA      XLATTER      RNUC
  0.70000000  0.00000000  0.00000000 Point Charge
   XN   XL   XJ      XE          XZ      XDELL
  1.0  0.0  0.5      -1.000       1.000     0.00000
 ICORP=  0  NPCL=  0  DEMP=0.00  PEPS=0.000000
 R(1)=  0.1000000E-08 D=  0.1005080E+01 RNUC=  0.0000000E+00
 converged at cycle   32  DENSITY AVERAGING    0.2400
  MAXIMUM ERROR IN R.V(R) IS   0.79874357E-05
 Q,EY,EV,EZ,ESUM,ETOT,RHO  0.100000E+01 -0.266614E+00 -0.619969E+00 -0.910779E+00 -0.203940E+00 -0.415998E+00  0.337036E-17


 DIRAC CALCULATION
1                    HYDROGEN ATOM RELATIVISTIC, Point Nuc, A and c from libtc


 EXCHANGE COEFFICIENT=  0.7000000           TAIL CORRECTION=  0.           NUCLEAR RADIUS=  0.000E+00
0                       ORBITAL    N    L    J     ELECTRONS     EIGENVALUE                DELTA OF EIGENV.

                          1S1/2  1.0  0.0  0.5     1.000       -0.2039397E+00                 0.2720093E-06


                                        NUCLEAR CHARGE=    1.000000
                            INTEGRAL OF CHARGE DENSITY=    1.000000
                           SUM OF THE ORBITAL ENERGIES=     -0.2039
                                          TOTAL ENERGY=     -0.4160
                                        KINETIC ENERGY=      0.4160
                             NUCLEAR ATTRACTION ENERGY=     -0.9108
                             ELECTRON REPULSION ENERGY=      0.2787
                                       EXCHANGE ENERGY=     -0.2000

 *******************************************************************************

                             D I R A C   E X I T
 NORMAL TERMINATION


 =================
 Timing Statistics
 =================
  
 Total Used :                     CPU=        0.04      System=        0.01     Elapsed=        0.07

 Calls  Section                     ( Mean, Percentage )
 ---------------------------------------------------------------------------------------------------
     2  ><      ................      0.00    0.02             0.00    0.04             0.00    0.02
     1  EXIT PROCEDURE .........      0.04   99.98             0.01   99.96             0.07   99.98


 Currently Open Files (EXIT00)
 ====================

 Unit    Access Format  Status   Type       Ident (file)
 -------------------------------------------------------
   3      SEQ    FORM   TRANSP  NORMAL      LOGFILE
                                          ( logfile )


 Buffered I/O statistics
 =======================
 Memory available:                     67108864
 Number of records fitting in memory:     16131
 Input : 100.0% of                            0  *4k bytes
 Output: 100.0% of                            0  *4k bytes
 Records from serial files evicted:           0
                    others evicted:           0
 Hash table lookups:          0 with          0 conflicts (100.00%)
NORMAL TERMINATION

Create H   file=TZ2P-H
XC
  GGA PBE
End
relativistic ZORA
HartreeFock
Corepotentials t12.rel
End Input

 *******************************************************************************
 *                                                                             *
 *  -------------------------------------                                      *
 *   Amsterdam Density Functional  (ADF)         2017                          *
 *  -------------------------------------                                      *
 *                                               r58813 2017-04-12             *
 *                                                                             *
 *                                                                             *
 *                              =================                              *
 *                              |               |                              *
 *                              |     A D F     |                              *
 *                              |               |                              *
 *                              =================                              *
 *                                                                             *
 *                                                                             *
 *   Online information and documentation:  https://www.scm.com/support/       *
 *   E-mail:  support@scm.com   info@scm.com                                   *
 *                                                                             *
 *   Scientific publications using ADF results must be properly referenced     *
 *   See the User Manuals (or the web site) for recommended citations          *
 *   The terms and conditions of the End User License Agreement apply to       *
 *   the use of ADF, https://www.scm.com/license-terms/                        *
 *                                                                             *
 **********************  x86_64_linux_intel / intelmpi  ************************
 
 Licensed to: SURF-SARA, Comp. & Networking Services / Amsterdam / NL
 SCM User ID: u7409
  
 ADF 2017  RunTime: Dec10-2020 14:08:02  Nodes: 1  Procs: 1

 Temporary files are created in /scratch/kid_0.8X5SjI

 Hydrogen (TZ2P)


 ===========================
 A T T A C H E D   F I L E S
 ===========================
  
 CREATE - Data File:    TZ2P-H
                        Hydrogen (TZ2P)
 Core Potentials:
         file : t12.rel


 ===============================
 M O D E L   P A R A M E T E R S
 ===============================
  
 DENSITY FUNCTIONAL POTENTIAL (scf)
    LDA:                               PW92                                    == Not Default ==
    Gradient Corrections:              PBEc PBEx                               == Not Default ==

 SPIN  (restricted / unrestr.)
    Molecule:                          Restricted                               

 OTHER ASPECTS
    Relativistic Corrections:          scalar (ZORA,MAPA)                      == Not Default ==

    Nuclear Charge Density Model:      Point Charge Nuclei                      
    Core Treatment:                    Frozen Orbital(s)                        

    Hyperfine or Zeeman Interaction:   ---                                      


 =====================================
 S Y M M E T R Y ,   E L E C T R O N S
 =====================================
  
 Symmetry: ATOM

 Irreducible Representations, including subspecies
 -------------------------------------------------
 S
 P:x  P:y  P:z
 D:z2  D:x2-y2  D:xy  D:xz  D:yz
 F:z3  F:z  F:xyz  F:z2x  F:z2y  F:x  F:y


 Configuration of Valence Electrons
 ==================================

          Occupation Numbers
          -------------------------------------------------
 S        1
 P        0
 D        0
 F        0
          -------------------------------------------------

 Total:   1

 Net Charge: 0 (Nuclei minus Electrons)

 Preset values for MO occupations will be applied through SCF cycle no. 1000000
 Thereafter, the program will assign electrons to MOs that are spatially
 similar to the occupied MOs in a "reference" cycle ("KeepOrbitals").
 The reference cycle is always the PREVIOUS cycle: it will evolve with
 the SCF procedure.


 ================================
 (Slater-type)  F U N C T I O N S  ***  (Basis and Fit)  ***
 ================================
  

 Atom Type    1  (H)
 ==============

 Valence Basis Sets:   5
 -----------------------
   1 S    0.690000
   1 S    0.920000
   1 S    1.580000
   2 P    1.250000
   3 D    2.500000


 BAS: List of all Elementary Cartesian Basis Functions
 =====================================================

 The numbering in the list below (to the right of the function characteristics) is referred
 to in print-outs of MO eigenvectors and Mulliken populations in the BAS representation
 (as contrasted to the SFO representation).

 Notes:
 1. The functions are characterized by a polynomial prefactor (powers of x,y,z and r) and
    an exponential decay factor alpha.
 2. Since the basis sets are specific for an atom TYPE, the individual functions occur on
    all atoms of that type.
 3. The word 'Core' in the left margin signals that it is a Core Function (CF) : not a
    degree of freedom in the valence set, but only used to ensure orthogonalization of
    the other valence basis functions on the frozen Core Orbitals.


 (power of) X  Y  Z  R     Alpha  on Atom
            ==========     =====     ==========

 H                                    1
                                  ---------------------------------------------------------------------------
            0  0  0  0     0.690      1
            0  0  0  0     0.920      2
            0  0  0  0     1.580      3
            1  0  0  0     1.250      4
            0  1  0  0     1.250      5
            0  0  1  0     1.250      6
            2  0  0  0     2.500      7
            1  1  0  0     2.500      8
            1  0  1  0     2.500      9
            0  2  0  0     2.500     10
            0  1  1  0     2.500     11
            0  0  2  0     2.500     12

 Total number of charge fitting functions (nprimf)        50
 Total number of Cartesian basis functions (naos)         12
 Total number of Cartesian core functions  (ncos)          0


 BAS: List of all Elementary Cartesian Basis Functions
 =====================================================

 The numbering in the list below (to the right of the function characteristics) is referred
 to in print-outs of MO eigenvectors and Mulliken populations in the BAS representation
 (as contrasted to the SFO representation).

 Notes:
 1. The functions are characterized by a polynomial prefactor (powers of x,y,z and r) and
    an exponential decay factor alpha.
 2. Since the basis sets are specific for an atom TYPE, the individual functions occur on
    all atoms of that type.
 3. The word 'Core' in the left margin signals that it is a Core Function (CF) : not a
    degree of freedom in the valence set, but only used to ensure orthogonalization of
    the other valence basis functions on the frozen Core Orbitals.


 (power of) X  Y  Z  R     Alpha  on Atom
            ==========     =====     ==========

 H                                    1
                                  ---------------------------------------------------------------------------
            0  0  0  0     0.690      1
            0  0  0  0     0.920      2
            0  0  0  0     1.580      3
            1  0  0  0     1.250      4
            0  1  0  0     1.250      5
            0  0  1  0     1.250      6
            2  0  0  0     2.500      7
            1  1  0  0     2.500      8
            1  0  1  0     2.500      9
            0  2  0  0     2.500     10
            0  1  1  0     2.500     11
            0  0  2  0     2.500     12
1
 ***************************************************************************************************


                                              ***********************
                                              *  T E C H N I C A L  *
                                              ***********************
  


 =============================================================
 P A R A L L E L I Z A T I O N  and  V E C T O R I Z A T I O N
 =============================================================
  
 Nr of parallel processes:                                1
 Maximum vector length in NumInt loops:                 128

 IO buffersize (Mb):                                     64.000000


 =====================
 S C F   U P D A T E S
 =====================
  
 Max. nr. of cycles:                               300
 Convergence criterion:                              0.0000000100
   secondary criterion:                              0.0000000100

 Mix parameter (when DIIS does not apply):           0.2000000000
 Special mix parameter for the first cycle:          1.0000000000
 Mixed ADIIS+DIIS will be used
    Max number of expansion vectors:                10
    Pure ADIIS when Max([F,P]) is above              0.1000000000
    Pure DIIS when Max([F,P]) is below               0.0010000000
 Automatic ElectronSmearing (in case of problematic SCF convergence) disabled


 =================
 P R E C I S I O N  ***  (General: NumInt, NeglectFunctionTails, ...)  ***
 =================
  

 NumInt:           Target precision:                12.0000000000
 -------           Initial precision:               10.0000000000
                   Min. precision (optimization):   10.0000000000

 Neglect Functions:          Basis functions:        0.1000000000E-13
 ------------------          Fit functions:          0.1000000000E-13


 ===========================
 L I N E A R   S C A L I N G
 ===========================
  

 Cut-off radii density fit:                        0.1000000000E-97
 Overlap cut-off criterion AO matrix elements:     0.1000000000E-97
 Cut-offs for Coulomb potential and fitted density:0.1000000000E-97
 Cut-off criterion for Coulomb multipole terms:    0.1000000000E-97
 Progressive Convergence parameter:                 0.000000000    
1
 ***************************************************************************************************


                                            ***************************
                                            *  C O M P U T A T I O N  *
                                            ***************************
  

 Number of elements of the density matrix on this node (used, total):        78        78


 ===========================================
 Numerical Integration : Fuzzy Cells (Becke)
 ===========================================
  
 Becke grid quality: VERYGOOD       
  
 Lebedev angular grid order:             min:  13 max:  41
 Nr. of radial points:                   min:  64 max:  64

 Total nr. of points:         64
 Nr. of blocks:                1
 Block length:                64
 Nr. of dummy points:          0


 Test of Precision of the Numerical Integration Grid
 ===================================================

 Integral of the Total Core Density:                   0.00000000000000


 ========================
 Density Fitting (zlmFit)
 ========================
  
 ZlmFit Fit Quality: VERYGOOD       
  
 Max L-expansion:                        min:   0 max:   0
 Nr. of radial interpolation points:     min: 130 max: 130


 =====
 S C F  ***  ScaSCF  ***
 =====
  

 CYCLE    1
 SCF Error: norm([F,P])=      0.000000000000, max([F,P])=      0.000000000000
 orbitals (Q,E):
 ---------------
 S :1...3            ( 1.00    -0.5000)  ( 0.00    -0.0900)  ( 0.00     1.2936)
 P :1...1            ( 0.00     0.1562)
 D :1...1            ( 0.00     2.2914)

 CYCLE    2
 SCF Error: norm([F,P])=      0.031550472103, max([F,P])=      0.030121296888
 orbitals (Q,E):
 ---------------
 S :1...2            ( 1.00    -0.2218)  ( 0.00     0.1019)
 P :1...1            ( 0.00     0.4189)
 D :1...1            ( 0.00     2.5824)

 CYCLE    3
  SDIIS (wt  0.000):  0.1996  0.8004
 A-DIIS (wt  1.000):  0.0000  1.0000
  DIIS coefficients:  0.0000  1.0000
 SCF Error: norm([F,P])=      0.008620363195, max([F,P])=      0.008345718591
 orbitals (Q,E):
 ---------------
 S :1...2            ( 1.00    -0.2422)  ( 0.00     0.0889)
 P :1...1            ( 0.00     0.4024)
 D :1...1            ( 0.00     2.5619)

 CYCLE    4
  SDIIS (wt  0.993):  0.1666  0.8334
 A-DIIS (wt  0.007):  0.0000  1.0000
  DIIS coefficients:  0.1654  0.8346
 SCF Error: norm([F,P])=      0.001733197582, max([F,P])=      0.001719525172
 orbitals (Q,E):
 ---------------
 S :1...2            ( 1.00    -0.2386)  ( 0.00     0.0908)
 P :1...1            ( 0.00     0.4054)
 D :1...1            ( 0.00     2.5657)

 CYCLE    5
  SDIIS (wt  1.000):  0.0236  0.9764
  DIIS coefficients:  0.0236  0.9764
 SCF Error: norm([F,P])=      0.000043722685, max([F,P])=      0.000039815539
 orbitals (Q,E):
 ---------------
 S :1...2            ( 1.00    -0.2386)  ( 0.00     0.0908)
 P :1...1            ( 0.00     0.4054)
 D :1...1            ( 0.00     2.5656)

 CYCLE    6
  SDIIS (wt  1.000): -0.0578  1.0578
  DIIS coefficients: -0.0578  1.0578
 SCF Error: norm([F,P])=      0.000002387703, max([F,P])=      0.000002161666
 orbitals (Q,E):
 ---------------
 S :1...2            ( 1.00    -0.2386)  ( 0.00     0.0908)
 P :1...1            ( 0.00     0.4054)
 D :1...1            ( 0.00     2.5656)

 CYCLE    7
  SDIIS (wt  1.000): -0.0032  1.0032
  DIIS coefficients: -0.0032  1.0032
 SCF Error: norm([F,P])=      0.000000007756, max([F,P])=      0.000000007262
 orbitals (Q,E):
 ---------------
 S :1...2            ( 1.00    -0.2386)  ( 0.00     0.0908)
 P :1...1            ( 0.00     0.4054)
 D :1...1            ( 0.00     2.5656)

 SCF CONVERGED

 CYCLE    8
1
 ***************************************************************************************************


                                                *******************
                                                *  R E S U L T S  *
                                                *******************
  
  
 Hartree-Fock exchange energy:  -0.144886863649892     
 *** Setting up for NEW gradients in Focky
 *** Using FIT density in Focky

 Scaled ZORA Orbital Energies, per Irrep and Spin:
 =================================================
                        Occup              E (au)              E (eV)       Diff (eV) with prev. cycle
                        -----      --------------------        ------       --------------------------
 S
               1        1.000     -0.23862975420190E+00        -6.493               7.48E-09
               2        0.000      0.90763523721244E-01         2.470
               3        0.000      0.15217347450009E+01        41.409
 P
               1        0.000      0.40536414462565E+00        11.031
 D
               1        0.000      0.25655939238649E+01        69.813


 Partially Occupied:
               1 S                -0.23862975420190E+00
  
 LUMO :        2 S                 0.90763523721244E-01
  


 Orbital Energies, all Irreps
 ========================================

 Irrep        no.  (spin)   Occup              E (au)                E (eV)
 ---------------------------------------------------------------------------
 S             1             1.00       -0.23862975420190E+00        -6.4934
 S             2             0.00        0.90763523721244E-01         2.4698
 P             1             0.00        0.40536414462565E+00        11.0305
 S             3             0.00        0.15217347450009E+01        41.4085
 D             1             0.00        0.25655939238649E+01        69.8134


 All Electron Calculation, thus no Orbital Energies of the Core Orbitals are calculated


 =======================================
 M U L L I K E N   P O P U L A T I O N S
 =======================================
  
 The survey below gives for each atom:
 a) the total charge (Z minus electrons)
 b) the net spin polarization (nr of electrons spin-A minus spin-B)
 c) for each spin the atomic electron valence density (integrated) per L-value.

 Atom              Charge    Spin density          S         P         D         F
 ----              ------    ------------       ------    ------    ------    ------
 1 H               0.0000                       1.0000    0.0000    0.0000    0.0000

 Populations of individual BAS functions
 ----------------------------------------
 1 H            0.2107  0.6786  0.1108  0.0000  0.0000  0.0000  0.0000  0.0000  0.0000  0.0000
                0.0000  0.0000

 Gross Charges per Atom (Z minus electrons)
 ==========================================
             0.0000
 Net Total:  0.00000000


 =======================================================================
 Electrostatic potential at the Nuclei due to electrons and other nuclei
 =======================================================================
  
         Atom                  Potential
         ----                  ---------
     1)   H                   0.94465291
 
 
 ========================
 No memory problems found
 ========================
 
 Maximum number of active allocate calls:         382
 
 *******************************************************************************

                             A D F   E X I T
 NORMAL TERMINATION


 =================
 Timing Statistics
 =================
  
 Total Used :                     CPU=        0.20      System=        0.02     Elapsed=        0.27

 Calls  Section                     ( Mean, Percentage )
 ---------------------------------------------------------------------------------------------------
     3  ><      ................      0.00    0.22             0.00    1.58             0.00    1.14
     1  INIT    ................      0.01    4.37             0.01   40.14             0.03    9.35
     1  GEOMET  ................      0.00    1.27             0.00   22.11             0.01    4.27
     1  INPUTA  ................      0.00    0.46             0.00    3.28             0.00    0.76
     1  MAINSY  ................      0.01    2.53             0.00    5.10             0.01    4.04
     1  SYMFIT  ................      0.00    0.01             0.00    5.44             0.00    0.33
     1  CORORT  ................      0.00    0.00             0.00    2.30             0.00    0.50
     1  SYMORB  ................      0.00    0.00             0.00    4.43             0.00    0.27
     1  FITINT  ................      0.00    2.40             0.00    8.47             0.01    2.84
     1  CLSMAT  ................      0.00    0.14             0.00    0.00             0.00    0.57
     1  ORTHON  ................      0.00    0.56             0.00    0.00             0.00    0.76
     1  GENPT   ................      0.01    3.17             0.00    0.62             0.01    3.31
     1  PTBAS   ................      0.00    1.09             0.00    6.26             0.00    1.72
     8  FOCKY   ................      0.02   64.93             0.00    0.28             0.02   49.78
     8  FOCKTR  ................      0.00    1.82             0.00    0.00             0.00    1.37
     8  SDIIS   ................      0.00    4.43             0.00    0.00             0.00    7.76
     1  COREPS  ................      0.01    4.85             0.00    0.00             0.01    3.65
     1  POPAN   ................      0.00    1.38             0.00    0.00             0.00    1.52
     1  DEBYE   ................      0.00    0.20             0.00    0.00             0.00    0.58
     1  EXIT PROCEDURE .........      0.01    6.16             0.00    0.00             0.01    5.48


 Currently Open Files (EXIT00)
 ====================

 Unit    Access Format  Status   Type       Ident (file)
 -------------------------------------------------------
   3      SEQ    FORM   TRANSP  NORMAL      LOGFILE
                                          ( logfile )


 Buffered I/O statistics
 =======================
 Memory available:                     67108864
 Number of records fitting in memory:     16131
 Input :   0.2% of                        19554  *4k bytes
 Output:  17.6% of                         1157  *4k bytes
 Records from serial files evicted:           0
                    others evicted:           0
 Hash table lookups:      50265 with          0 conflicts (  0.00%)

 ***************************************************************************************************
 (LOGFILE)
 <Dec10-2020> <14:08:02>  DIRAC 2017  RunTime: Dec10-2020 14:08:02  Nodes: 1  Procs: 1
 <Dec10-2020> <14:08:02>  NORMAL TERMINATION
 <Dec10-2020> <14:08:02>  END
 <Dec10-2020> <14:08:02>  ADF 2017  RunTime: Dec10-2020 14:08:02  Nodes: 1  Procs: 1
 <Dec10-2020> <14:08:02>  Hydrogen (TZ2P)
 <Dec10-2020> <14:08:02>  RunType   : CREATE
 <Dec10-2020> <14:08:02>  Net Charge: 0 (Nuclei minus Electrons)
 <Dec10-2020> <14:08:02>  Symmetry  : ATOM
  Coordinates
    Atom         X           Y           Z   (Angstrom)
    1.H         0.000000    0.000000    0.000000
 <Dec10-2020> <14:08:02>  >>>> CORORT
 <Dec10-2020> <14:08:02>  >>>> FITINT
 <Dec10-2020> <14:08:02>  >>>> CLSMAT
 <Dec10-2020> <14:08:02>  >>>> ORTHON
 <Dec10-2020> <14:08:02>  >>>> GENPT
 <Dec10-2020> <14:08:02>  Block Length=  64
 <Dec10-2020> <14:08:02>  >>>> PTBAS
 <Dec10-2020> <14:08:02>  >>>> CYCLE
 <Dec10-2020> <14:08:02>              |Error|         MaxErr       Wt(A-DIIS)
 <Dec10-2020> <14:08:02>      1      0.00000000      0.00000000
 <Dec10-2020> <14:08:02>      2      0.03155047      0.03012130
 <Dec10-2020> <14:08:02>      3      0.00862036      0.00834572    100.0
 <Dec10-2020> <14:08:03>      4      0.00173320      0.00171953      0.7
 <Dec10-2020> <14:08:03>      5      0.00004372      0.00003982      0.0
 <Dec10-2020> <14:08:03>      6      0.00000239      0.00000216      0.0
 <Dec10-2020> <14:08:03>      7      0.00000001      0.00000001      0.0
 <Dec10-2020> <14:08:03>  SCF converged
 <Dec10-2020> <14:08:03>      8      0.00000000      0.00000000      0.0
 <Dec10-2020> <14:08:03>  >>>> POPAN
 <Dec10-2020> <14:08:03>  >>>> DEBYE
 <Dec10-2020> <14:08:03>  NORMAL TERMINATION
 <Dec10-2020> <14:08:03>  END
NORMAL TERMINATION

 *******************************************************************************
 *                                                                             *
 *  -------------------------------------                                      *
 *   Amsterdam Density Functional  (ADF)         2017                          *
 *  -------------------------------------                                      *
 *                                               r58813 2017-04-12             *
 *                                                                             *
 *                                                                             *
 *                            =====================                            *
 *                            |                   |                            *
 *                            |     D I R A C     |                            *
 *                            |                   |                            *
 *                            =====================                            *
 *                                                                             *
 *                                                                             *
 *   Online information and documentation:  https://www.scm.com/support/       *
 *   E-mail:  support@scm.com   info@scm.com                                   *
 *                                                                             *
 *   Scientific publications using ADF results must be properly referenced     *
 *   See the User Manuals (or the web site) for recommended citations          *
 *   The terms and conditions of the End User License Agreement apply to       *
 *   the use of ADF, https://www.scm.com/license-terms/                        *
 *                                                                             *
 **********************  x86_64_linux_intel / intelmpi  ************************
 
 Licensed to: SURF-SARA, Comp. & Networking Services / Amsterdam / NL
 SCM User ID: u7409
  
 DIRAC 2017  RunTime: Dec10-2020 14:08:03  Nodes: 1  Procs: 1

 Temporary files are created in /scratch/kid_0.3nBae0

1
 NITROGEN ATOM 1s CORE RELATIVISTIC, Point Nuc, A and c from 
 N J RN H ZN XION ANUC CLIGHT
 5000    4100.00000000197.36710137  7.00000000  0.00000000   14.003074  0.1370360E+03
  PH   PHI     EPS        DEL        DELRVR
  0.30  0.30     2500.00  0.00001000  0.00001000
 IDIRC  NC1  NDEBU NPRIN  IPUN IRCOR IWCOR
   1   300     0     0     0     0     1
   XALPHA      XLATTER      RNUC
  0.70000000  0.00000000  0.00000000 Point Charge
   XN   XL   XJ      XE          XZ      XDELL
  1.0  0.0  0.5      -5.000       2.000     0.00000
  2.0  0.0  0.5      -1.000       2.000     0.00000
  2.0  1.0  0.5      -1.000       2.000     0.00000
  2.0  1.0  1.5      -1.000       1.000     0.00000
 ICORP=  0  NPCL=  0  DEMP=0.00  PEPS=0.000000
 R(1)=  0.1000000E-08 D=  0.1005080E+01 RNUC=  0.0000000E+00
 converged at cycle   25  DENSITY AVERAGING    0.3000
  MAXIMUM ERROR IN R.V(R) IS   0.97905511E-05
 Q,EY,EV,EZ,ESUM,ETOT,RHO  0.700000E+01 -0.796419E+01 -0.840156E+02 -0.127663E+03 -0.300692E+02 -0.538837E+02  0.270066E-14


 DIRAC CALCULATION
1                    NITROGEN ATOM 1s CORE RELATIVISTIC, Point Nuc, A and c from libtc


 EXCHANGE COEFFICIENT=  0.7000000           TAIL CORRECTION=  0.           NUCLEAR RADIUS=  0.000E+00
0                       ORBITAL    N    L    J     ELECTRONS     EIGENVALUE                DELTA OF EIGENV.

                          1S1/2  1.0  0.0  0.5     2.000       -0.1403720E+02                 0.4993583E-04
                          2S1/2  2.0  0.0  0.5     2.000       -0.6456810E+00                 0.6544571E-05
                          2P1/2  2.0  1.0  0.5     2.000       -0.2347008E+00                 0.5687228E-05
                          2P3/2  2.0  1.0  1.5     1.000       -0.2339893E+00                 0.5679256E-05


                                        NUCLEAR CHARGE=    7.000000
                            INTEGRAL OF CHARGE DENSITY=    7.000000
                           SUM OF THE ORBITAL ENERGIES=    -30.0692
                                          TOTAL ENERGY=    -53.8837
                                        KINETIC ENERGY=     53.9465
                             NUCLEAR ATTRACTION ENERGY=   -127.6627
                             ELECTRON REPULSION ENERGY=     25.8056
                                       EXCHANGE ENERGY=     -5.9731

 *******************************************************************************

                             D I R A C   E X I T
 NORMAL TERMINATION


 =================
 Timing Statistics
 =================
  
 Total Used :                     CPU=        0.07      System=        0.01     Elapsed=        0.47

 Calls  Section                     ( Mean, Percentage )
 ---------------------------------------------------------------------------------------------------
     2  ><      ................      0.00    0.01             0.00    0.04             0.00    0.00
     1  EXIT PROCEDURE .........      0.07   99.99             0.01   99.96             0.47  100.00


 Currently Open Files (EXIT00)
 ====================

 Unit    Access Format  Status   Type       Ident (file)
 -------------------------------------------------------
   3      SEQ    FORM   TRANSP  NORMAL      LOGFILE
                                          ( logfile )


 Buffered I/O statistics
 =======================
 Memory available:                     67108864
 Number of records fitting in memory:     16131
 Input : 100.0% of                            0  *4k bytes
 Output: 100.0% of                            0  *4k bytes
 Records from serial files evicted:           0
                    others evicted:           0
 Hash table lookups:          0 with          0 conflicts (100.00%)
NORMAL TERMINATION

Create N   file=TZ2P-N.1s
XC
  GGA PBE
End
relativistic ZORA
HartreeFock
Corepotentials t12.rel
End Input

 *******************************************************************************
 *                                                                             *
 *  -------------------------------------                                      *
 *   Amsterdam Density Functional  (ADF)         2017                          *
 *  -------------------------------------                                      *
 *                                               r58813 2017-04-12             *
 *                                                                             *
 *                                                                             *
 *                              =================                              *
 *                              |               |                              *
 *                              |     A D F     |                              *
 *                              |               |                              *
 *                              =================                              *
 *                                                                             *
 *                                                                             *
 *   Online information and documentation:  https://www.scm.com/support/       *
 *   E-mail:  support@scm.com   info@scm.com                                   *
 *                                                                             *
 *   Scientific publications using ADF results must be properly referenced     *
 *   See the User Manuals (or the web site) for recommended citations          *
 *   The terms and conditions of the End User License Agreement apply to       *
 *   the use of ADF, https://www.scm.com/license-terms/                        *
 *                                                                             *
 **********************  x86_64_linux_intel / intelmpi  ************************
 
 Licensed to: SURF-SARA, Comp. & Networking Services / Amsterdam / NL
 SCM User ID: u7409
  
 ADF 2017  RunTime: Dec10-2020 14:08:03  Nodes: 1  Procs: 1

 Temporary files are created in /scratch/kid_0.K1k55M

 Nitrogen (TZ2P, 1s frozen)


 ===========================
 A T T A C H E D   F I L E S
 ===========================
  
 CREATE - Data File:    TZ2P-N.1s
                        Nitrogen (TZ2P, 1s frozen)
 Core Potentials:
         file : t12.rel


 ===============================
 M O D E L   P A R A M E T E R S
 ===============================
  
 DENSITY FUNCTIONAL POTENTIAL (scf)
    LDA:                               PW92                                    == Not Default ==
    Gradient Corrections:              PBEc PBEx                               == Not Default ==

 SPIN  (restricted / unrestr.)
    Molecule:                          Restricted                               

 OTHER ASPECTS
    Relativistic Corrections:          scalar (ZORA,MAPA)                      == Not Default ==

    Nuclear Charge Density Model:      Point Charge Nuclei                      
    Core Treatment:                    Frozen Orbital(s)                        

    Hyperfine or Zeeman Interaction:   ---                                      


 =====================================
 S Y M M E T R Y ,   E L E C T R O N S
 =====================================
  
 Symmetry: ATOM

 Irreducible Representations, including subspecies
 -------------------------------------------------
 S
 P:x  P:y  P:z
 D:z2  D:x2-y2  D:xy  D:xz  D:yz
 F:z3  F:z  F:xyz  F:z2x  F:z2y  F:x  F:y


 Configuration of Valence Electrons
 ==================================

          Occupation Numbers
          -------------------------------------------------
 S        2
 P        3
 D        0
 F        0
          -------------------------------------------------

 Total:   5

 Net Charge: 0 (Nuclei minus Electrons)

 Preset values for MO occupations will be applied through SCF cycle no. 1000000
 Thereafter, the program will assign electrons to MOs that are spatially
 similar to the occupied MOs in a "reference" cycle ("KeepOrbitals").
 The reference cycle is always the PREVIOUS cycle: it will evolve with
 the SCF procedure.


 ================================
 (Slater-type)  F U N C T I O N S  ***  (Basis and Fit)  ***
 ================================
  

 Atom Type    1  (N)
 ==============

 Valence Basis Sets:   9
 -----------------------
   1 S    6.380000
   2 S    1.500000
   2 S    2.500000
   2 S    5.150000
   2 P    1.000000
   2 P    1.880000
   2 P    3.680000
   3 D    2.200000
   4 F    3.300000

 Frozen Core Shells
 ------------------
    S:  1


 BAS: List of all Elementary Cartesian Basis Functions
 =====================================================

 The numbering in the list below (to the right of the function characteristics) is referred
 to in print-outs of MO eigenvectors and Mulliken populations in the BAS representation
 (as contrasted to the SFO representation).

 Notes:
 1. The functions are characterized by a polynomial prefactor (powers of x,y,z and r) and
    an exponential decay factor alpha.
 2. Since the basis sets are specific for an atom TYPE, the individual functions occur on
    all atoms of that type.
 3. The word 'Core' in the left margin signals that it is a Core Function (CF) : not a
    degree of freedom in the valence set, but only used to ensure orthogonalization of
    the other valence basis functions on the frozen Core Orbitals.


 (power of) X  Y  Z  R     Alpha  on Atom
            ==========     =====     ==========

 N                                    1
                                  ---------------------------------------------------------------------------
    Core    0  0  0  0     6.380      1
            0  0  0  1     1.500      2
            0  0  0  1     2.500      3
            0  0  0  1     5.150      4
            1  0  0  0     1.000      5
            0  1  0  0     1.000      6
            0  0  1  0     1.000      7
            1  0  0  0     1.880      8
            0  1  0  0     1.880      9
            0  0  1  0     1.880     10
            1  0  0  0     3.680     11
            0  1  0  0     3.680     12
            0  0  1  0     3.680     13
            2  0  0  0     2.200     14
            1  1  0  0     2.200     15
            1  0  1  0     2.200     16
            0  2  0  0     2.200     17
            0  1  1  0     2.200     18
            0  0  2  0     2.200     19
            3  0  0  0     3.300     20
            2  1  0  0     3.300     21
            2  0  1  0     3.300     22
            1  2  0  0     3.300     23
            1  1  1  0     3.300     24
            1  0  2  0     3.300     25
            0  3  0  0     3.300     26
            0  2  1  0     3.300     27
            0  1  2  0     3.300     28
            0  0  3  0     3.300     29

 Total number of charge fitting functions (nprimf)        82
 Total number of Cartesian basis functions (naos)         29
 Total number of Cartesian core functions  (ncos)          1


 BAS: List of all Elementary Cartesian Basis Functions
 =====================================================

 The numbering in the list below (to the right of the function characteristics) is referred
 to in print-outs of MO eigenvectors and Mulliken populations in the BAS representation
 (as contrasted to the SFO representation).

 Notes:
 1. The functions are characterized by a polynomial prefactor (powers of x,y,z and r) and
    an exponential decay factor alpha.
 2. Since the basis sets are specific for an atom TYPE, the individual functions occur on
    all atoms of that type.
 3. The word 'Core' in the left margin signals that it is a Core Function (CF) : not a
    degree of freedom in the valence set, but only used to ensure orthogonalization of
    the other valence basis functions on the frozen Core Orbitals.


 (power of) X  Y  Z  R     Alpha  on Atom
            ==========     =====     ==========

 N                                    1
                                  ---------------------------------------------------------------------------
    Core    0  0  0  0     6.380      1
            0  0  0  1     1.500      2
            0  0  0  1     2.500      3
            0  0  0  1     5.150      4
            1  0  0  0     1.000      5
            0  1  0  0     1.000      6
            0  0  1  0     1.000      7
            1  0  0  0     1.880      8
            0  1  0  0     1.880      9
            0  0  1  0     1.880     10
            1  0  0  0     3.680     11
            0  1  0  0     3.680     12
            0  0  1  0     3.680     13
            2  0  0  0     2.200     14
            1  1  0  0     2.200     15
            1  0  1  0     2.200     16
            0  2  0  0     2.200     17
            0  1  1  0     2.200     18
            0  0  2  0     2.200     19
            3  0  0  0     3.300     20
            2  1  0  0     3.300     21
            2  0  1  0     3.300     22
            1  2  0  0     3.300     23
            1  1  1  0     3.300     24
            1  0  2  0     3.300     25
            0  3  0  0     3.300     26
            0  2  1  0     3.300     27
            0  1  2  0     3.300     28
            0  0  3  0     3.300     29
1
 ***************************************************************************************************


                                              ***********************
                                              *  T E C H N I C A L  *
                                              ***********************
  


 =============================================================
 P A R A L L E L I Z A T I O N  and  V E C T O R I Z A T I O N
 =============================================================
  
 Nr of parallel processes:                                1
 Maximum vector length in NumInt loops:                 128

 IO buffersize (Mb):                                     64.000000


 =====================
 S C F   U P D A T E S
 =====================
  
 Max. nr. of cycles:                               300
 Convergence criterion:                              0.0000000100
   secondary criterion:                              0.0000000100

 Mix parameter (when DIIS does not apply):           0.2000000000
 Special mix parameter for the first cycle:          1.0000000000
 Mixed ADIIS+DIIS will be used
    Max number of expansion vectors:                10
    Pure ADIIS when Max([F,P]) is above              0.1000000000
    Pure DIIS when Max([F,P]) is below               0.0010000000
 Automatic ElectronSmearing (in case of problematic SCF convergence) disabled


 =================
 P R E C I S I O N  ***  (General: NumInt, NeglectFunctionTails, ...)  ***
 =================
  

 NumInt:           Target precision:                12.0000000000
 -------           Initial precision:               10.0000000000
                   Min. precision (optimization):   10.0000000000

 Neglect Functions:          Basis functions:        0.1000000000E-13
 ------------------          Fit functions:          0.1000000000E-13


 ===========================
 L I N E A R   S C A L I N G
 ===========================
  

 Cut-off radii density fit:                        0.1000000000E-97
 Overlap cut-off criterion AO matrix elements:     0.1000000000E-97
 Cut-offs for Coulomb potential and fitted density:0.1000000000E-97
 Cut-off criterion for Coulomb multipole terms:    0.1000000000E-97
 Progressive Convergence parameter:                 0.000000000    
1
 ***************************************************************************************************


                                            ***************************
                                            *  C O M P U T A T I O N  *
                                            ***************************
  

 Number of elements of the density matrix on this node (used, total):       435       435


 ===========================================
 Numerical Integration : Fuzzy Cells (Becke)
 ===========================================
  
 Becke grid quality: VERYGOOD       
  
 Lebedev angular grid order:             min:  13 max:  41
 Nr. of radial points:                   min:  68 max:  68

 Total nr. of points:         68
 Nr. of blocks:                1
 Block length:                68
 Nr. of dummy points:          0


 Test of Precision of the Numerical Integration Grid
 ===================================================

 Integral of the Total Core Density:                   2.00000004779028
 Relative Error:                                       2.390E-08


 ========================
 Density Fitting (zlmFit)
 ========================
  
 ZlmFit Fit Quality: VERYGOOD       
  
 Max L-expansion:                        min:   0 max:   0
 Nr. of radial interpolation points:     min: 160 max: 160


 =====
 S C F  ***  ScaSCF  ***
 =====
  

 CYCLE    1
 SCF Error: norm([F,P])=      0.000000000000, max([F,P])=      0.000000000000
 orbitals (Q,E):
 ---------------
 S :1...3            ( 2.00    -3.8409)  ( 0.00    -1.5644)  ( 0.00     8.5048)
 P :1...3            ( 3.00    -3.5351)  ( 0.00    -1.4204)  ( 0.00     0.1191)
 D :1...1            ( 0.00    -1.3270)
 F :1...1            ( 0.00     1.2143)

 CYCLE    2
 SCF Error: norm([F,P])=      2.833197771698, max([F,P])=      1.837988556476
 orbitals (Q,E):
 ---------------
 S :1...2            ( 2.00    -0.1742)  ( 0.00     1.0772)
 P :1...2            ( 3.00     0.1254)  ( 0.00     0.7151)
 D :1...1            ( 0.00     1.6599)
 F :1...1            ( 0.00     4.5057)

 CYCLE    3
  SDIIS (wt  0.000):  0.3273  0.6727
 A-DIIS (wt  1.000):  0.4087  0.5913
  DIIS coefficients:  0.4087  0.5913
 SCF Error: norm([F,P])=      1.576436808644, max([F,P])=      1.190496268513
 orbitals (Q,E):
 ---------------
 S :1...2            ( 2.00    -0.8624)  ( 0.00     0.4802)
 P :1...2            ( 3.00    -0.4339)  ( 0.00     0.2173)
 D :1...1            ( 0.00     1.0855)
 F :1...1            ( 0.00     3.8266)

 CYCLE    4
  SDIIS (wt  0.000):  0.1441  0.8559
 A-DIIS (wt  1.000):  0.0000  1.0000
  DIIS coefficients:  0.0000  1.0000
 SCF Error: norm([F,P])=      0.274647640829, max([F,P])=      0.177936058975
 orbitals (Q,E):
 ---------------
 S :1...2            ( 2.00    -0.5781)  ( 0.00     0.6716)
 P :1...2            ( 3.00    -0.1636)  ( 0.00     0.3412)
 D :1...1            ( 0.00     1.3249)
 F :1...1            ( 0.00     4.1002)

 CYCLE    5
  SDIIS (wt  0.000): -0.0024  0.5316  0.4708
 A-DIIS (wt  1.000):  0.0000  0.5288  0.4712
  DIIS coefficients:  0.0000  0.5288  0.4712
 SCF Error: norm([F,P])=      0.317722153740, max([F,P])=      0.218767092504
 orbitals (Q,E):
 ---------------
 S :1...2            ( 2.00    -0.6836)  ( 0.00     0.5961)
 P :1...2            ( 3.00    -0.2607)  ( 0.00     0.2867)
 D :1...1            ( 0.00     1.2424)
 F :1...1            ( 0.00     4.0032)

 CYCLE    6
  SDIIS (wt  0.987):  0.0009  0.0005 -0.0142  1.0128
 A-DIIS (wt  0.013):  0.0000  0.0000  0.0000  1.0000
  DIIS coefficients:  0.0009  0.0005 -0.0140  1.0126
 SCF Error: norm([F,P])=      0.003285554382, max([F,P])=      0.002300302063
 orbitals (Q,E):
 ---------------
 S :1...2            ( 2.00    -0.6843)  ( 0.00     0.5956)
 P :1...2            ( 3.00    -0.2614)  ( 0.00     0.2859)
 D :1...1            ( 0.00     1.2420)
 F :1...1            ( 0.00     4.0027)

 CYCLE    7
  SDIIS (wt  1.000): -0.0000  0.0006  0.0003  0.0085  0.9906
  DIIS coefficients: -0.0000  0.0006  0.0003  0.0085  0.9906
 SCF Error: norm([F,P])=      0.000067659588, max([F,P])=      0.000037679289
 orbitals (Q,E):
 ---------------
 S :1...2            ( 2.00    -0.6843)  ( 0.00     0.5956)
 P :1...2            ( 3.00    -0.2615)  ( 0.00     0.2859)
 D :1...1            ( 0.00     1.2420)
 F :1...1            ( 0.00     4.0026)

 CYCLE    8
  SDIIS (wt  1.000):  0.0000 -0.0000 -0.0011  0.0201  0.9810
  DIIS coefficients:  0.0000 -0.0000 -0.0011  0.0201  0.9810
 SCF Error: norm([F,P])=      0.000009603269, max([F,P])=      0.000006647777
 orbitals (Q,E):
 ---------------
 S :1...2            ( 2.00    -0.6843)  ( 0.00     0.5956)
 P :1...2            ( 3.00    -0.2615)  ( 0.00     0.2859)
 D :1...1            ( 0.00     1.2420)
 F :1...1            ( 0.00     4.0026)

 CYCLE    9
  SDIIS (wt  1.000): -0.0000 -0.0000 -0.0020  1.0020
  DIIS coefficients: -0.0000 -0.0000 -0.0020  1.0020
 SCF Error: norm([F,P])=      0.000000042469, max([F,P])=      0.000000029453
 orbitals (Q,E):
 ---------------
 S :1...2            ( 2.00    -0.6843)  ( 0.00     0.5956)
 P :1...2            ( 3.00    -0.2615)  ( 0.00     0.2859)
 D :1...1            ( 0.00     1.2420)
 F :1...1            ( 0.00     4.0026)

 CYCLE   10
  SDIIS (wt  1.000):  0.0000 -0.0003  1.0003
  DIIS coefficients:  0.0000 -0.0003  1.0003
 SCF Error: norm([F,P])=      0.000000000064, max([F,P])=      0.000000000044
 orbitals (Q,E):
 ---------------
 S :1...2            ( 2.00    -0.6843)  ( 0.00     0.5956)
 P :1...2            ( 3.00    -0.2615)  ( 0.00     0.2859)
 D :1...1            ( 0.00     1.2420)
 F :1...1            ( 0.00     4.0026)

 SCF CONVERGED

 CYCLE   11
1
 ***************************************************************************************************


                                                *******************
                                                *  R E S U L T S  *
                                                *******************
  
  
 Hartree-Fock exchange energy:   -1.64416261707535     
 *** Setting up for NEW gradients in Focky
 *** Using FIT density in Focky

 Scaled ZORA Orbital Energies, per Irrep and Spin:
 =================================================
                        Occup              E (au)              E (eV)       Diff (eV) with prev. cycle
                        -----      --------------------        ------       --------------------------
 S
               1        2.000     -0.68434328667187E+00       -18.622              -3.98E-12
               2        0.000      0.59557427948295E+00        16.206
               3        0.000      0.12424128894897E+02       338.078
 P
               1        3.000     -0.26146847042514E+00        -7.115              -3.86E-12
               2        0.000      0.28585406994462E+00         7.778
               3        0.000      0.32885122261216E+01        89.485
 D
               1        0.000      0.12419750122773E+01        33.796
 F
               1        0.000      0.40026186455796E+01       108.917


 Partially Occupied:
               1 P                -0.26146847042514E+00
  
 HOMO :        1 S                -0.68434328667187E+00
 LUMO :        2 P                 0.28585406994462E+00
  


 Orbital Energies, all Irreps
 ========================================

 Irrep        no.  (spin)   Occup              E (au)                E (eV)
 ---------------------------------------------------------------------------
 S             1             2.00       -0.68434328667187E+00       -18.6219
 P             1             3.00       -0.26146847042514E+00        -7.1149
 P             2             0.00        0.28585406994462E+00         7.7785
 S             2             0.00        0.59557427948295E+00        16.2064
 D             1             0.00        0.12419750122773E+01        33.7959
 P             3             0.00        0.32885122261216E+01        89.4850
 F             1             0.00        0.40026186455796E+01       108.9168
 S             3             0.00        0.12424128894897E+02       338.0777


 Scaled ZORA Orbital Energies of the Core Orbitals:
 ==================================================

 (Note that the atoms are grouped by atomtype, see the labels, and may hence NOT be in input order)

 AtomType  Orbital  Atom                   E (au)                        E (eV)
 --------  -------  ----           --------------------        ----------------
 N           1S        1          -0.14150350397423E+02                -385.051


 =======================================
 M U L L I K E N   P O P U L A T I O N S
 =======================================
  
 The survey below gives for each atom:
 a) the total charge (Z minus electrons)
 b) the net spin polarization (nr of electrons spin-A minus spin-B)
 c) for each spin the atomic electron valence density (integrated) per L-value.

 Atom              Charge    Spin density          S         P         D         F
 ----              ------    ------------       ------    ------    ------    ------
 1 N              -0.0000                       2.0000    3.0000    0.0000    0.0000

 Populations of individual BAS functions
 ----------------------------------------
 1 N            0.0006  0.9046  1.1474 -0.0527  0.2943  0.2943  0.2943  0.5648  0.5648  0.5648
                0.1410  0.1410  0.1410  0.0000  0.0000  0.0000  0.0000  0.0000  0.0000  0.0000
                0.0000  0.0000  0.0000  0.0000  0.0000  0.0000  0.0000  0.0000  0.0000

 Gross Charges per Atom (Z minus electrons)
 ==========================================
            -0.0000
 Net Total: -0.00000000


 =======================================================================
 Electrostatic potential at the Nuclei due to electrons and other nuclei
 =======================================================================
  
         Atom                  Potential
         ----                  ---------
     1)   N                  18.24635171
 
 
 ========================
 No memory problems found
 ========================
 
 Maximum number of active allocate calls:         493
 
 *******************************************************************************

                             A D F   E X I T
 NORMAL TERMINATION


 =================
 Timing Statistics
 =================
  
 Total Used :                     CPU=        0.29      System=        0.02     Elapsed=        0.41

 Calls  Section                     ( Mean, Percentage )
 ---------------------------------------------------------------------------------------------------
     3  ><      ................      0.00    0.00             0.00    6.35             0.00    0.76
     1  INIT    ................      0.01    3.85             0.00   24.19             0.03    6.14
     1  GEOMET  ................      0.01    2.21             0.00    0.00             0.04   10.35
     1  INPUTA  ................      0.00    0.18             0.00   13.11             0.00    0.83
     1  MAINSY  ................      0.01    3.27             0.00    3.83             0.03    6.45
     1  SYMFIT  ................      0.00    0.42             0.00    0.05             0.00    0.30
     1  CORORT  ................      0.00    0.27             0.00    0.00             0.00    0.49
     1  SYMORB  ................      0.00    0.23             0.00    0.00             0.00    0.17
     1  FITINT  ................      0.01    2.40             0.00    2.90             0.01    2.20
     1  CLSMAT  ................      0.00    0.08             0.00    0.40             0.00    0.38
     1  ORTHON  ................      0.00    0.33             0.00    1.65             0.00    0.59
     1  GENPT   ................      0.00    1.44             0.00   25.10             0.01    2.67
     1  PTBAS   ................      0.00    1.10             0.00    0.89             0.00    1.16
    11  FOCKY   ................      0.02   67.09             0.00   21.44             0.02   49.97
    11  FOCKTR  ................      0.00    2.18             0.00    0.11             0.00    1.58
    11  SDIIS   ................      0.00    4.52             0.00    0.00             0.00    7.30
     1  COREPS  ................      0.01    4.63             0.00    0.00             0.01    3.34
     1  POPAN   ................      0.00    1.25             0.00    0.00             0.01    1.27
     1  DEBYE   ................      0.00    0.15             0.00    0.00             0.00    0.39
     1  EXIT PROCEDURE .........      0.01    4.39             0.00    0.00             0.01    3.66


 Currently Open Files (EXIT00)
 ====================

 Unit    Access Format  Status   Type       Ident (file)
 -------------------------------------------------------
   3      SEQ    FORM   TRANSP  NORMAL      LOGFILE
                                          ( logfile )


 Buffered I/O statistics
 =======================
 Memory available:                     67108864
 Number of records fitting in memory:     16131
 Input :   0.1% of                        30330  *4k bytes
 Output:  15.9% of                         1472  *4k bytes
 Records from serial files evicted:           0
                    others evicted:           0
 Hash table lookups:      78481 with          0 conflicts (  0.00%)

 ***************************************************************************************************
 (LOGFILE)
 <Dec10-2020> <14:08:02>  DIRAC 2017  RunTime: Dec10-2020 14:08:02  Nodes: 1  Procs: 1
 <Dec10-2020> <14:08:02>  NORMAL TERMINATION
 <Dec10-2020> <14:08:02>  END
 <Dec10-2020> <14:08:02>  ADF 2017  RunTime: Dec10-2020 14:08:02  Nodes: 1  Procs: 1
 <Dec10-2020> <14:08:02>  Hydrogen (TZ2P)
 <Dec10-2020> <14:08:02>  RunType   : CREATE
 <Dec10-2020> <14:08:02>  Net Charge: 0 (Nuclei minus Electrons)
 <Dec10-2020> <14:08:02>  Symmetry  : ATOM
  Coordinates
    Atom         X           Y           Z   (Angstrom)
    1.H         0.000000    0.000000    0.000000
 <Dec10-2020> <14:08:02>  >>>> CORORT
 <Dec10-2020> <14:08:02>  >>>> FITINT
 <Dec10-2020> <14:08:02>  >>>> CLSMAT
 <Dec10-2020> <14:08:02>  >>>> ORTHON
 <Dec10-2020> <14:08:02>  >>>> GENPT
 <Dec10-2020> <14:08:02>  Block Length=  64
 <Dec10-2020> <14:08:02>  >>>> PTBAS
 <Dec10-2020> <14:08:02>  >>>> CYCLE
 <Dec10-2020> <14:08:02>              |Error|         MaxErr       Wt(A-DIIS)
 <Dec10-2020> <14:08:02>      1      0.00000000      0.00000000
 <Dec10-2020> <14:08:02>      2      0.03155047      0.03012130
 <Dec10-2020> <14:08:02>      3      0.00862036      0.00834572    100.0
 <Dec10-2020> <14:08:03>      4      0.00173320      0.00171953      0.7
 <Dec10-2020> <14:08:03>      5      0.00004372      0.00003982      0.0
 <Dec10-2020> <14:08:03>      6      0.00000239      0.00000216      0.0
 <Dec10-2020> <14:08:03>      7      0.00000001      0.00000001      0.0
 <Dec10-2020> <14:08:03>  SCF converged
 <Dec10-2020> <14:08:03>      8      0.00000000      0.00000000      0.0
 <Dec10-2020> <14:08:03>  >>>> POPAN
 <Dec10-2020> <14:08:03>  >>>> DEBYE
 <Dec10-2020> <14:08:03>  NORMAL TERMINATION
 <Dec10-2020> <14:08:03>  END
 <Dec10-2020> <14:08:03>  DIRAC 2017  RunTime: Dec10-2020 14:08:03  Nodes: 1  Procs: 1
 <Dec10-2020> <14:08:03>  NORMAL TERMINATION
 <Dec10-2020> <14:08:03>  END
 <Dec10-2020> <14:08:03>  ADF 2017  RunTime: Dec10-2020 14:08:03  Nodes: 1  Procs: 1
 <Dec10-2020> <14:08:03>  Nitrogen (TZ2P, 1s frozen)
 <Dec10-2020> <14:08:03>  RunType   : CREATE
 <Dec10-2020> <14:08:03>  Net Charge: 0 (Nuclei minus Electrons)
 <Dec10-2020> <14:08:03>  Symmetry  : ATOM
  Coordinates
    Atom         X           Y           Z   (Angstrom)
    1.N         0.000000    0.000000    0.000000
 <Dec10-2020> <14:08:03>  >>>> CORORT
 <Dec10-2020> <14:08:03>  >>>> FITINT
 <Dec10-2020> <14:08:03>  >>>> CLSMAT
 <Dec10-2020> <14:08:03>  >>>> ORTHON
 <Dec10-2020> <14:08:03>  >>>> GENPT
 <Dec10-2020> <14:08:03>  Block Length=  68
 <Dec10-2020> <14:08:03>  >>>> PTBAS
 <Dec10-2020> <14:08:03>  >>>> CYCLE
 <Dec10-2020> <14:08:04>              |Error|         MaxErr       Wt(A-DIIS)
 <Dec10-2020> <14:08:04>      1      0.00000000      0.00000000
 <Dec10-2020> <14:08:04>      2      2.83319777      1.83798856
 <Dec10-2020> <14:08:04>      3      1.57643681      1.19049627    100.0
 <Dec10-2020> <14:08:04>      4      0.27464764      0.17793606    100.0
 <Dec10-2020> <14:08:04>      5      0.31772215      0.21876709    100.0
 <Dec10-2020> <14:08:04>      6      0.00328555      0.00230030      1.3
 <Dec10-2020> <14:08:04>      7      0.00006766      0.00003768      0.0
 <Dec10-2020> <14:08:04>      8      0.00000960      0.00000665      0.0
 <Dec10-2020> <14:08:04>      9      0.00000004      0.00000003      0.0
 <Dec10-2020> <14:08:04>     10      0.00000000      0.00000000      0.0
 <Dec10-2020> <14:08:04>  SCF converged
 <Dec10-2020> <14:08:04>     11      0.00000000      0.00000000      0.0
 <Dec10-2020> <14:08:04>  >>>> POPAN
 <Dec10-2020> <14:08:04>  >>>> DEBYE
 <Dec10-2020> <14:08:04>  NORMAL TERMINATION
 <Dec10-2020> <14:08:04>  END
NORMAL TERMINATION

 *******************************************************************************
 *                                                                             *
 *  -------------------------------------                                      *
 *   Amsterdam Density Functional  (ADF)         2017                          *
 *  -------------------------------------                                      *
 *                                               r58813 2017-04-12             *
 *                                                                             *
 *                                                                             *
 *                            =====================                            *
 *                            |                   |                            *
 *                            |     D I R A C     |                            *
 *                            |                   |                            *
 *                            =====================                            *
 *                                                                             *
 *                                                                             *
 *   Online information and documentation:  https://www.scm.com/support/       *
 *   E-mail:  support@scm.com   info@scm.com                                   *
 *                                                                             *
 *   Scientific publications using ADF results must be properly referenced     *
 *   See the User Manuals (or the web site) for recommended citations          *
 *   The terms and conditions of the End User License Agreement apply to       *
 *   the use of ADF, https://www.scm.com/license-terms/                        *
 *                                                                             *
 **********************  x86_64_linux_intel / intelmpi  ************************
 
 Licensed to: SURF-SARA, Comp. & Networking Services / Amsterdam / NL
 SCM User ID: u7409
  
 DIRAC 2017  RunTime: Dec10-2020 14:08:04  Nodes: 1  Procs: 1

 Temporary files are created in /scratch/kid_0.DWOgse

1
 SULPHUR ATOM 1s CORE RELATIVISTIC, Point Nuc, A and c from l
 N J RN H ZN XION ANUC CLIGHT
 5000    7100.00000000197.36710137 16.00000000  0.00000000   31.972070  0.1370360E+03
  PH   PHI     EPS        DEL        DELRVR
  0.30  0.30     2500.00  0.00001000  0.00001000
 IDIRC  NC1  NDEBU NPRIN  IPUN IRCOR IWCOR
   1   300     0     0     0     0     1
   XALPHA      XLATTER      RNUC
  0.70000000  0.00000000  0.00000000 Point Charge
   XN   XL   XJ      XE          XZ      XDELL
  1.0  0.0  0.5    -600.000       2.000     0.00000
  2.0  0.0  0.5     -75.000       2.000     0.00000
  2.0  1.0  0.5     -70.000       2.000     0.00000
  2.0  1.0  1.5     -70.000       4.000     0.00000
  3.0  0.0  0.5     -25.000       2.000     0.00000
  3.0  1.0  0.5      -0.250       2.000     0.00000
  3.0  1.0  1.5      -0.250       2.000     0.00000
 ICORP=  0  NPCL=  0  DEMP=0.00  PEPS=0.000000
 R(1)=  0.1000000E-08 D=  0.1005080E+01 RNUC=  0.0000000E+00
 converged at cycle   32  DENSITY AVERAGING    0.3000
  MAXIMUM ERROR IN R.V(R) IS   0.72551816E-05
 Q,EY,EV,EZ,ESUM,ETOT,RHO  0.160000E+02 -0.322118E+02 -0.628554E+03 -0.950912E+03 -0.228522E+03 -0.397754E+03  0.428595E-13


 DIRAC CALCULATION
1                    SULPHUR ATOM 1s CORE RELATIVISTIC, Point Nuc, A and c from libtc


 EXCHANGE COEFFICIENT=  0.7000000           TAIL CORRECTION=  0.           NUCLEAR RADIUS=  0.000E+00
0                       ORBITAL    N    L    J     ELECTRONS     EIGENVALUE                DELTA OF EIGENV.

                          1S1/2  1.0  0.0  0.5     2.000       -0.8822261E+02                 0.4395884E-04
                          2S1/2  2.0  0.0  0.5     2.000       -0.7739913E+01                 0.5298639E-05
                          2P1/2  2.0  1.0  0.5     2.000       -0.5775818E+01                 0.7066558E-05
                          2P3/2  2.0  1.0  1.5     4.000       -0.5729254E+01                 0.7085802E-05
                          3S1/2  3.0  0.0  0.5     2.000       -0.6034996E+00                 0.4266530E-06
                          3P1/2  3.0  1.0  0.5     2.000       -0.2319612E+00                 0.4585064E-06
                          3P3/2  3.0  1.0  1.5     2.000       -0.2288141E+00                 0.4612681E-06


                                        NUCLEAR CHARGE=   16.000000
                            INTEGRAL OF CHARGE DENSITY=   16.000000
                           SUM OF THE ORBITAL ENERGIES=   -228.5222
                                          TOTAL ENERGY=   -397.7542
                                        KINETIC ENERGY=    400.0321
                             NUCLEAR ATTRACTION ENERGY=   -950.9123
                             ELECTRON REPULSION ENERGY=    177.2849
                                       EXCHANGE ENERGY=    -24.1588

 *******************************************************************************

                             D I R A C   E X I T
 NORMAL TERMINATION


 =================
 Timing Statistics
 =================
  
 Total Used :                     CPU=        0.12      System=        0.00     Elapsed=        0.14

 Calls  Section                     ( Mean, Percentage )
 ---------------------------------------------------------------------------------------------------
     2  ><      ................      0.00    0.01             0.00    0.00             0.00    0.01
     1  EXIT PROCEDURE .........      0.12   99.99             0.00  100.00             0.14   99.99


 Currently Open Files (EXIT00)
 ====================

 Unit    Access Format  Status   Type       Ident (file)
 -------------------------------------------------------
   3      SEQ    FORM   TRANSP  NORMAL      LOGFILE
                                          ( logfile )


 Buffered I/O statistics
 =======================
 Memory available:                     67108864
 Number of records fitting in memory:     16131
 Input : 100.0% of                            0  *4k bytes
 Output: 100.0% of                            0  *4k bytes
 Records from serial files evicted:           0
                    others evicted:           0
 Hash table lookups:          0 with          0 conflicts (100.00%)
NORMAL TERMINATION

Create S   file=TZ2P-S.1s
XC
  GGA PBE
End
relativistic ZORA
HartreeFock
Corepotentials t12.rel
End Input

 *******************************************************************************
 *                                                                             *
 *  -------------------------------------                                      *
 *   Amsterdam Density Functional  (ADF)         2017                          *
 *  -------------------------------------                                      *
 *                                               r58813 2017-04-12             *
 *                                                                             *
 *                                                                             *
 *                              =================                              *
 *                              |               |                              *
 *                              |     A D F     |                              *
 *                              |               |                              *
 *                              =================                              *
 *                                                                             *
 *                                                                             *
 *   Online information and documentation:  https://www.scm.com/support/       *
 *   E-mail:  support@scm.com   info@scm.com                                   *
 *                                                                             *
 *   Scientific publications using ADF results must be properly referenced     *
 *   See the User Manuals (or the web site) for recommended citations          *
 *   The terms and conditions of the End User License Agreement apply to       *
 *   the use of ADF, https://www.scm.com/license-terms/                        *
 *                                                                             *
 **********************  x86_64_linux_intel / intelmpi  ************************
 
 Licensed to: SURF-SARA, Comp. & Networking Services / Amsterdam / NL
 SCM User ID: u7409
  
 ADF 2017  RunTime: Dec10-2020 14:08:04  Nodes: 1  Procs: 1

 Temporary files are created in /scratch/kid_0.JXqHnC

 Sulphur (TZ2P, 1s frozen)


 ===========================
 A T T A C H E D   F I L E S
 ===========================
  
 CREATE - Data File:    TZ2P-S.1s
                        Sulphur (TZ2P, 1s frozen)
 Core Potentials:
         file : t12.rel


 ===============================
 M O D E L   P A R A M E T E R S
 ===============================
  
 DENSITY FUNCTIONAL POTENTIAL (scf)
    LDA:                               PW92                                    == Not Default ==
    Gradient Corrections:              PBEc PBEx                               == Not Default ==

 SPIN  (restricted / unrestr.)
    Molecule:                          Restricted                               

 OTHER ASPECTS
    Relativistic Corrections:          scalar (ZORA,MAPA)                      == Not Default ==

    Nuclear Charge Density Model:      Point Charge Nuclei                      
    Core Treatment:                    Frozen Orbital(s)                        

    Hyperfine or Zeeman Interaction:   ---                                      


 =====================================
 S Y M M E T R Y ,   E L E C T R O N S
 =====================================
  
 Symmetry: ATOM

 Irreducible Representations, including subspecies
 -------------------------------------------------
 S
 P:x  P:y  P:z
 D:z2  D:x2-y2  D:xy  D:xz  D:yz
 F:z3  F:z  F:xyz  F:z2x  F:z2y  F:x  F:y


 Configuration of Valence Electrons
 ==================================

          Occupation Numbers
          -------------------------------------------------
 S        2*2
 P        6 4
 D        0
 F        0
          -------------------------------------------------

 Total:   14

 Net Charge: 0 (Nuclei minus Electrons)

 Preset values for MO occupations will be applied through SCF cycle no. 1000000
 Thereafter, the program will assign electrons to MOs that are spatially
 similar to the occupied MOs in a "reference" cycle ("KeepOrbitals").
 The reference cycle is always the PREVIOUS cycle: it will evolve with
 the SCF procedure.


 ================================
 (Slater-type)  F U N C T I O N S  ***  (Basis and Fit)  ***
 ================================
  

 Atom Type    1  (S)
 ==============

 Valence Basis Sets:  13
 -----------------------
   1 S   13.450000
   2 S    5.900000
   2 S    4.250000
   2 P    8.050000
   2 P    4.550000
   3 S    1.500000
   3 S    2.250000
   3 S    3.400000
   3 P    1.000000
   3 P    1.600000
   3 P    2.450000
   3 D    2.100000
   4 F    2.100000

 Frozen Core Shells
 ------------------
    S:  1


 BAS: List of all Elementary Cartesian Basis Functions
 =====================================================

 The numbering in the list below (to the right of the function characteristics) is referred
 to in print-outs of MO eigenvectors and Mulliken populations in the BAS representation
 (as contrasted to the SFO representation).

 Notes:
 1. The functions are characterized by a polynomial prefactor (powers of x,y,z and r) and
    an exponential decay factor alpha.
 2. Since the basis sets are specific for an atom TYPE, the individual functions occur on
    all atoms of that type.
 3. The word 'Core' in the left margin signals that it is a Core Function (CF) : not a
    degree of freedom in the valence set, but only used to ensure orthogonalization of
    the other valence basis functions on the frozen Core Orbitals.


 (power of) X  Y  Z  R     Alpha  on Atom
            ==========     =====     ==========

 S                                    1
                                  ---------------------------------------------------------------------------
    Core    0  0  0  0    13.450      1
            0  0  0  1     5.900      2
            0  0  0  1     4.250      3
            1  0  0  0     8.050      4
            0  1  0  0     8.050      5
            0  0  1  0     8.050      6
            1  0  0  0     4.550      7
            0  1  0  0     4.550      8
            0  0  1  0     4.550      9
            0  0  0  2     1.500     10
            0  0  0  2     2.250     11
            0  0  0  2     3.400     12
            1  0  0  1     1.000     13
            0  1  0  1     1.000     14
            0  0  1  1     1.000     15
            1  0  0  1     1.600     16
            0  1  0  1     1.600     17
            0  0  1  1     1.600     18
            1  0  0  1     2.450     19
            0  1  0  1     2.450     20
            0  0  1  1     2.450     21
            2  0  0  0     2.100     22
            1  1  0  0     2.100     23
            1  0  1  0     2.100     24
            0  2  0  0     2.100     25
            0  1  1  0     2.100     26
            0  0  2  0     2.100     27
            3  0  0  0     2.100     28
            2  1  0  0     2.100     29
            2  0  1  0     2.100     30
            1  2  0  0     2.100     31
            1  1  1  0     2.100     32
            1  0  2  0     2.100     33
            0  3  0  0     2.100     34
            0  2  1  0     2.100     35
            0  1  2  0     2.100     36
            0  0  3  0     2.100     37

 Total number of charge fitting functions (nprimf)       106
 Total number of Cartesian basis functions (naos)         37
 Total number of Cartesian core functions  (ncos)          1


 BAS: List of all Elementary Cartesian Basis Functions
 =====================================================

 The numbering in the list below (to the right of the function characteristics) is referred
 to in print-outs of MO eigenvectors and Mulliken populations in the BAS representation
 (as contrasted to the SFO representation).

 Notes:
 1. The functions are characterized by a polynomial prefactor (powers of x,y,z and r) and
    an exponential decay factor alpha.
 2. Since the basis sets are specific for an atom TYPE, the individual functions occur on
    all atoms of that type.
 3. The word 'Core' in the left margin signals that it is a Core Function (CF) : not a
    degree of freedom in the valence set, but only used to ensure orthogonalization of
    the other valence basis functions on the frozen Core Orbitals.


 (power of) X  Y  Z  R     Alpha  on Atom
            ==========     =====     ==========

 S                                    1
                                  ---------------------------------------------------------------------------
    Core    0  0  0  0    13.450      1
            0  0  0  1     5.900      2
            0  0  0  1     4.250      3
            1  0  0  0     8.050      4
            0  1  0  0     8.050      5
            0  0  1  0     8.050      6
            1  0  0  0     4.550      7
            0  1  0  0     4.550      8
            0  0  1  0     4.550      9
            0  0  0  2     1.500     10
            0  0  0  2     2.250     11
            0  0  0  2     3.400     12
            1  0  0  1     1.000     13
            0  1  0  1     1.000     14
            0  0  1  1     1.000     15
            1  0  0  1     1.600     16
            0  1  0  1     1.600     17
            0  0  1  1     1.600     18
            1  0  0  1     2.450     19
            0  1  0  1     2.450     20
            0  0  1  1     2.450     21
            2  0  0  0     2.100     22
            1  1  0  0     2.100     23
            1  0  1  0     2.100     24
            0  2  0  0     2.100     25
            0  1  1  0     2.100     26
            0  0  2  0     2.100     27
            3  0  0  0     2.100     28
            2  1  0  0     2.100     29
            2  0  1  0     2.100     30
            1  2  0  0     2.100     31
            1  1  1  0     2.100     32
            1  0  2  0     2.100     33
            0  3  0  0     2.100     34
            0  2  1  0     2.100     35
            0  1  2  0     2.100     36
            0  0  3  0     2.100     37
1
 ***************************************************************************************************


                                              ***********************
                                              *  T E C H N I C A L  *
                                              ***********************
  


 =============================================================
 P A R A L L E L I Z A T I O N  and  V E C T O R I Z A T I O N
 =============================================================
  
 Nr of parallel processes:                                1
 Maximum vector length in NumInt loops:                 128

 IO buffersize (Mb):                                     64.000000


 =====================
 S C F   U P D A T E S
 =====================
  
 Max. nr. of cycles:                               300
 Convergence criterion:                              0.0000000100
   secondary criterion:                              0.0000000100

 Mix parameter (when DIIS does not apply):           0.2000000000
 Special mix parameter for the first cycle:          1.0000000000
 Mixed ADIIS+DIIS will be used
    Max number of expansion vectors:                10
    Pure ADIIS when Max([F,P]) is above              0.1000000000
    Pure DIIS when Max([F,P]) is below               0.0010000000
 Automatic ElectronSmearing (in case of problematic SCF convergence) disabled


 =================
 P R E C I S I O N  ***  (General: NumInt, NeglectFunctionTails, ...)  ***
 =================
  

 NumInt:           Target precision:                12.0000000000
 -------           Initial precision:               10.0000000000
                   Min. precision (optimization):   10.0000000000

 Neglect Functions:          Basis functions:        0.1000000000E-13
 ------------------          Fit functions:          0.1000000000E-13


 ===========================
 L I N E A R   S C A L I N G
 ===========================
  

 Cut-off radii density fit:                        0.1000000000E-97
 Overlap cut-off criterion AO matrix elements:     0.1000000000E-97
 Cut-offs for Coulomb potential and fitted density:0.1000000000E-97
 Cut-off criterion for Coulomb multipole terms:    0.1000000000E-97
 Progressive Convergence parameter:                 0.000000000    
1
 ***************************************************************************************************


                                            ***************************
                                            *  C O M P U T A T I O N  *
                                            ***************************
  

 Number of elements of the density matrix on this node (used, total):       703       703


 ===========================================
 Numerical Integration : Fuzzy Cells (Becke)
 ===========================================
  
 Becke grid quality: VERYGOOD       
  
 Lebedev angular grid order:             min:  13 max:  41
 Nr. of radial points:                   min:  81 max:  81

 Total nr. of points:         81
 Nr. of blocks:                1
 Block length:                81
 Nr. of dummy points:          0


 Test of Precision of the Numerical Integration Grid
 ===================================================

 Integral of the Total Core Density:                   2.00000000119902
 Relative Error:                                       5.995E-10


 ========================
 Density Fitting (zlmFit)
 ========================
  
 ZlmFit Fit Quality: VERYGOOD       
  
 Max L-expansion:                        min:   0 max:   0
 Nr. of radial interpolation points:     min: 180 max: 180


 =====
 S C F  ***  ScaSCF  ***
 =====
  

 CYCLE    1
 SCF Error: norm([F,P])=      0.000000000000, max([F,P])=      0.000000000000
 orbitals (Q,E):
 ---------------
 S :1...5            ( 2.00   -26.6451)  ( 2.00   -11.3841)  ( 0.00    -6.2238)  ( 0.00    -3.7546)
                     ( 0.00     0.0426)
 P :1...5            ( 6.00   -25.8056)  ( 4.00   -10.7872)  ( 0.00    -5.6542)  ( 0.00    -3.2678)
                     ( 0.00    -2.0657)
 D :1...1            ( 0.00    -7.5994)
 F :1...1            ( 0.00    -5.1453)

 CYCLE    2
  SDIIS (wt  0.000):  1.0000  0.0000
 A-DIIS (wt  1.000):  0.0971  0.9029
  DIIS coefficients:  0.0971  0.9029
 SCF Error: norm([F,P])=     22.427591793496, max([F,P])=      6.683558782069
 orbitals (Q,E):
 ---------------
 S :1...3            ( 2.00    -5.3087)  ( 2.00    -0.5354)  ( 0.00     0.1443)
 P :1...3            ( 6.00    -3.0634)  ( 4.00    -0.2888)  ( 0.00     0.0363)
 D :1...1            ( 0.00     0.5584)
 F :1...1            ( 0.00     1.1945)

 CYCLE    3
  SDIIS (wt  0.000):  0.2089  0.7911
 A-DIIS (wt  1.000):  0.0000  1.0000
  DIIS coefficients:  0.0000  1.0000
 SCF Error: norm([F,P])=      8.979127587299, max([F,P])=      3.072816925113
 orbitals (Q,E):
 ---------------
 S :1...3            ( 2.00   -10.1095)  ( 2.00    -1.4084)  ( 0.00    -0.0966)
 P :1...3            ( 6.00    -8.2745)  ( 4.00    -0.9505)  ( 0.00    -0.0393)
 D :1...1            ( 0.00    -0.2305)
 F :1...1            ( 0.00     0.8176)

 CYCLE    4
  SDIIS (wt  0.000): -0.0923  0.2885  0.8038
 A-DIIS (wt  1.000):  0.0000  0.2179  0.7821
  DIIS coefficients:  0.0000  0.2179  0.7821
 SCF Error: norm([F,P])=      4.987074273371, max([F,P])=      1.969633810306
 orbitals (Q,E):
 ---------------
 S :1...3            ( 2.00    -7.1777)  ( 2.00    -0.4565)  ( 0.00     0.2712)
 P :1...3            ( 6.00    -5.1093)  ( 4.00    -0.1255)  ( 0.00     0.1865)
 D :1...1            ( 0.00     0.6117)
 F :1...1            ( 0.00     1.3866)

 CYCLE    5
  SDIIS (wt  0.000): -0.0129 -0.0431  0.1839  0.8722
 A-DIIS (wt  1.000):  0.0000  0.0000  0.0000  1.0000
  DIIS coefficients:  0.0000  0.0000  0.0000  1.0000
 SCF Error: norm([F,P])=      1.253016605367, max([F,P])=      0.519960781208
 orbitals (Q,E):
 ---------------
 S :1...3            ( 2.00    -8.3252)  ( 2.00    -0.8658)  ( 0.00     0.0959)
 P :1...3            ( 6.00    -6.3159)  ( 4.00    -0.4559)  ( 0.00     0.0683)
 D :1...1            ( 0.00     0.2058)
 F :1...1            ( 0.00     1.1083)

 CYCLE    6
  SDIIS (wt  0.000):  0.0014 -0.0237 -0.0448  0.4559  0.6112
 A-DIIS (wt  1.000):  0.0000  0.0000  0.0000  0.3648  0.6352
  DIIS coefficients:  0.0000  0.0000  0.0000  0.3648  0.6352
 SCF Error: norm([F,P])=      0.941928768639, max([F,P])=      0.376763147583
 orbitals (Q,E):
 ---------------
 S :1...3            ( 2.00    -7.7160)  ( 2.00    -0.6172)  ( 0.00     0.2016)
 P :1...3            ( 6.00    -5.6784)  ( 4.00    -0.2446)  ( 0.00     0.1326)
 D :1...1            ( 0.00     0.4460)
 F :1...1            ( 0.00     1.2789)

 CYCLE    7
  SDIIS (wt  0.524):  0.0002 -0.0008 -0.0046 -0.0251  0.0941  0.9362
 A-DIIS (wt  0.476):  0.0000  0.0000  0.0000  0.0000  0.0000  1.0000
  DIIS coefficients:  0.0001 -0.0004 -0.0024 -0.0131  0.0493  0.9665
 SCF Error: norm([F,P])=      0.113727855918, max([F,P])=      0.048115331759
 orbitals (Q,E):
 ---------------
 S :1...3            ( 2.00    -7.7997)  ( 2.00    -0.6435)  ( 0.00     0.1925)
 P :1...3            ( 6.00    -5.7659)  ( 4.00    -0.2651)  ( 0.00     0.1253)
 D :1...1            ( 0.00     0.4198)
 F :1...1            ( 0.00     1.2624)

 CYCLE    8
  SDIIS (wt  0.833): -0.0000 -0.0004  0.0010  0.0163 -0.0258  0.0330  0.9760
 A-DIIS (wt  0.167):  0.0000  0.0000  0.0000  0.0000  0.0000  0.0231  0.9769
  DIIS coefficients: -0.0000 -0.0003  0.0008  0.0136 -0.0215  0.0314  0.9762
 SCF Error: norm([F,P])=      0.041659308040, max([F,P])=      0.017547617115
 orbitals (Q,E):
 ---------------
 S :1...3            ( 2.00    -7.7737)  ( 2.00    -0.6333)  ( 0.00     0.1970)
 P :1...3            ( 6.00    -5.7386)  ( 4.00    -0.2567)  ( 0.00     0.1280)
 D :1...1            ( 0.00     0.4300)
 F :1...1            ( 0.00     1.2695)

 CYCLE    9
  SDIIS (wt  0.987):  0.0000  0.0000 -0.0001 -0.0000  0.0005  0.0096  0.1348  0.8552
 A-DIIS (wt  0.013):  0.0000  0.0000  0.0000  0.0000  0.0000  0.0000  0.0000  1.0000
  DIIS coefficients:  0.0000  0.0000 -0.0001 -0.0000  0.0005  0.0095  0.1331  0.8571
 SCF Error: norm([F,P])=      0.005273651965, max([F,P])=      0.002273583640
 orbitals (Q,E):
 ---------------
 S :1...3            ( 2.00    -7.7767)  ( 2.00    -0.6345)  ( 0.00     0.1964)
 P :1...3            ( 6.00    -5.7418)  ( 4.00    -0.2578)  ( 0.00     0.1276)
 D :1...1            ( 0.00     0.4287)
 F :1...1            ( 0.00     1.2687)

 CYCLE   10
  SDIIS (wt  1.000): -0.0000  0.0000  0.0000 -0.0000  0.0000  0.0002  0.0001  0.0141  0.9856
  DIIS coefficients: -0.0000  0.0000  0.0000 -0.0000  0.0000  0.0002  0.0001  0.0141  0.9856
 SCF Error: norm([F,P])=      0.000056042461, max([F,P])=      0.000024912649
 orbitals (Q,E):
 ---------------
 S :1...3            ( 2.00    -7.7766)  ( 2.00    -0.6345)  ( 0.00     0.1965)
 P :1...3            ( 6.00    -5.7418)  ( 4.00    -0.2578)  ( 0.00     0.1277)
 D :1...1            ( 0.00     0.4287)
 F :1...1            ( 0.00     1.2687)

 CYCLE   11
  SDIIS (wt  1.000):  0.0000  0.0000 -0.0000 -0.0001 -0.0009  0.0108  0.9902
  DIIS coefficients:  0.0000  0.0000 -0.0000 -0.0001 -0.0009  0.0108  0.9902
 SCF Error: norm([F,P])=      0.000000337982, max([F,P])=      0.000000170646
 orbitals (Q,E):
 ---------------
 S :1...3            ( 2.00    -7.7766)  ( 2.00    -0.6345)  ( 0.00     0.1965)
 P :1...3            ( 6.00    -5.7418)  ( 4.00    -0.2578)  ( 0.00     0.1277)
 D :1...1            ( 0.00     0.4287)
 F :1...1            ( 0.00     1.2687)

 CYCLE   12
  SDIIS (wt  1.000): -0.0000 -0.0007 -0.0183  1.0190
  DIIS coefficients: -0.0000 -0.0007 -0.0183  1.0190
 SCF Error: norm([F,P])=      0.000000005039, max([F,P])=      0.000000002389
 orbitals (Q,E):
 ---------------
 S :1...3            ( 2.00    -7.7766)  ( 2.00    -0.6345)  ( 0.00     0.1965)
 P :1...3            ( 6.00    -5.7418)  ( 4.00    -0.2578)  ( 0.00     0.1277)
 D :1...1            ( 0.00     0.4287)
 F :1...1            ( 0.00     1.2687)

 SCF CONVERGED

 CYCLE   13
1
 ***************************************************************************************************


                                                *******************
                                                *  R E S U L T S  *
                                                *******************
  
  
 Hartree-Fock exchange energy:   -13.6730503219038     
 *** Setting up for NEW gradients in Focky
 *** Using FIT density in Focky

 Scaled ZORA Orbital Energies, per Irrep and Spin:
 =================================================
                        Occup              E (au)              E (eV)       Diff (eV) with prev. cycle
                        -----      --------------------        ------       --------------------------
 S
               1        2.000     -0.77766412123308E+01      -211.613               4.57E-09
               2        2.000     -0.63451857726289E+00       -17.266               3.53E-09
               3        0.000      0.19645287890500E+00         5.346
               4        0.000      0.20672919198044E+01        56.254
               5        0.000      0.14309425186595E+02       389.379
 P
               1        6.000     -0.57417633597900E+01      -156.241               4.60E-09
               2        4.000     -0.25775334709776E+00        -7.014               3.07E-09
               3        0.000      0.12765130491437E+00         3.474
               4        0.000      0.10958298282207E+01        29.819
               5        0.000      0.12366729159346E+02       336.516
 D
               1        0.000      0.42873768329160E+00        11.667
 F
               1        0.000      0.12686780550896E+01        34.522


 Partially Occupied:
               2 P                -0.25775334709776E+00
  
 HOMO :        2 S                -0.63451857726289E+00
 LUMO :        3 P                 0.12765130491437E+00
  


 Orbital Energies, all Irreps
 ========================================

 Irrep        no.  (spin)   Occup              E (au)                E (eV)
 ---------------------------------------------------------------------------
 S             1             2.00       -0.77766412123308E+01      -211.6132
 P             1             6.00       -0.57417633597900E+01      -156.2413
 S             2             2.00       -0.63451857726289E+00       -17.2661
 P             2             4.00       -0.25775334709776E+00        -7.0138
 P             3             0.00        0.12765130491437E+00         3.4736
 S             3             0.00        0.19645287890500E+00         5.3458
 D             1             0.00        0.42873768329160E+00        11.6665
 P             4             0.00        0.10958298282207E+01        29.8190
 F             1             0.00        0.12686780550896E+01        34.5225
 S             4             0.00        0.20672919198044E+01        56.2539
 P             5             0.00        0.12366729159346E+02       336.5158
 S             5             0.00        0.14309425186595E+02       389.3793


 Scaled ZORA Orbital Energies of the Core Orbitals:
 ==================================================

 (Note that the atoms are grouped by atomtype, see the labels, and may hence NOT be in input order)

 AtomType  Orbital  Atom                   E (au)                        E (eV)
 --------  -------  ----           --------------------        ----------------
 S           1S        1          -0.88403237778613E+02               -2405.574


 =======================================
 M U L L I K E N   P O P U L A T I O N S
 =======================================
  
 The survey below gives for each atom:
 a) the total charge (Z minus electrons)
 b) the net spin polarization (nr of electrons spin-A minus spin-B)
 c) for each spin the atomic electron valence density (integrated) per L-value.

 Atom              Charge    Spin density          S         P         D         F
 ----              ------    ------------       ------    ------    ------    ------
 1 S               0.0000                       4.0000   10.0000    0.0000    0.0000

 Populations of individual BAS functions
 ----------------------------------------
 1 S           -0.0490  1.6992  0.2660  0.7979  0.7979  0.7979  1.2026  1.2026  1.2026  0.4602
                1.2619  0.3618  0.2257  0.2257  0.2257  0.6161  0.6161  0.6161  0.4910  0.4910
                0.4910  0.0000  0.0000  0.0000  0.0000  0.0000  0.0000  0.0000  0.0000  0.0000
                0.0000  0.0000  0.0000  0.0000  0.0000  0.0000  0.0000

 Gross Charges per Atom (Z minus electrons)
 ==========================================
             0.0000
 Net Total:  0.00000000


 =======================================================================
 Electrostatic potential at the Nuclei due to electrons and other nuclei
 =======================================================================
  
         Atom                  Potential
         ----                  ---------
     1)   S                  59.42394733
 
 
 ========================
 No memory problems found
 ========================
 
 Maximum number of active allocate calls:         493
 
 *******************************************************************************

                             A D F   E X I T
 NORMAL TERMINATION


 =================
 Timing Statistics
 =================
  
 Total Used :                     CPU=        0.35      System=        0.02     Elapsed=        0.43

 Calls  Section                     ( Mean, Percentage )
 ---------------------------------------------------------------------------------------------------
     3  ><      ................      0.00    0.17             0.00    0.00             0.00    0.69
     1  INIT    ................      0.01    3.21             0.00   18.72             0.03    5.86
     1  GEOMET  ................      0.01    1.62             0.00    5.05             0.01    2.89
     1  INPUTA  ................      0.00    0.44             0.00    0.00             0.00    0.51
     1  MAINSY  ................      0.00    0.92             0.00   19.86             0.01    3.08
     1  SYMFIT  ................      0.00    0.26             0.00    0.00             0.00    0.21
     1  CORORT  ................      0.00    0.22             0.00    0.00             0.00    0.50
     1  SYMORB  ................      0.00    0.25             0.00    0.00             0.00    0.21
     1  FITINT  ................      0.01    1.70             0.00   16.09             0.01    2.48
     1  CLSMAT  ................      0.00    0.08             0.00    0.00             0.00    0.39
     1  ORTHON  ................      0.00    0.34             0.00    0.36             0.00    0.53
     1  GENPT   ................      0.01    2.98             0.00    2.21             0.01    3.12
     1  PTBAS   ................      0.00    0.96             0.00    0.00             0.00    1.12
    13  FOCKY   ................      0.02   71.08             0.00   36.01             0.02   59.94
    13  FOCKTR  ................      0.00    2.14             0.00    0.58             0.00    1.76
    13  SDIIS   ................      0.00    4.24             0.00    1.13             0.00    8.03
     1  COREPS  ................      0.02    4.41             0.00    0.00             0.02    3.58
     1  POPAN   ................      0.00    1.05             0.00    0.00             0.01    1.15
     1  DEBYE   ................      0.00    0.14             0.00    0.00             0.00    0.35
     1  EXIT PROCEDURE .........      0.01    3.76             0.00    0.00             0.02    3.60


 Currently Open Files (EXIT00)
 ====================

 Unit    Access Format  Status   Type       Ident (file)
 -------------------------------------------------------
   3      SEQ    FORM   TRANSP  NORMAL      LOGFILE
                                          ( logfile )


 Buffered I/O statistics
 =======================
 Memory available:                     67108864
 Number of records fitting in memory:     16131
 Input :   0.1% of                        34512  *4k bytes
 Output:  14.8% of                         1584  *4k bytes
 Records from serial files evicted:           0
                    others evicted:           0
 Hash table lookups:      89911 with          0 conflicts (  0.00%)

 ***************************************************************************************************
 (LOGFILE)
 <Dec10-2020> <14:08:02>  DIRAC 2017  RunTime: Dec10-2020 14:08:02  Nodes: 1  Procs: 1
 <Dec10-2020> <14:08:02>  NORMAL TERMINATION
 <Dec10-2020> <14:08:02>  END
 <Dec10-2020> <14:08:02>  ADF 2017  RunTime: Dec10-2020 14:08:02  Nodes: 1  Procs: 1
 <Dec10-2020> <14:08:02>  Hydrogen (TZ2P)
 <Dec10-2020> <14:08:02>  RunType   : CREATE
 <Dec10-2020> <14:08:02>  Net Charge: 0 (Nuclei minus Electrons)
 <Dec10-2020> <14:08:02>  Symmetry  : ATOM
  Coordinates
    Atom         X           Y           Z   (Angstrom)
    1.H         0.000000    0.000000    0.000000
 <Dec10-2020> <14:08:02>  >>>> CORORT
 <Dec10-2020> <14:08:02>  >>>> FITINT
 <Dec10-2020> <14:08:02>  >>>> CLSMAT
 <Dec10-2020> <14:08:02>  >>>> ORTHON
 <Dec10-2020> <14:08:02>  >>>> GENPT
 <Dec10-2020> <14:08:02>  Block Length=  64
 <Dec10-2020> <14:08:02>  >>>> PTBAS
 <Dec10-2020> <14:08:02>  >>>> CYCLE
 <Dec10-2020> <14:08:02>              |Error|         MaxErr       Wt(A-DIIS)
 <Dec10-2020> <14:08:02>      1      0.00000000      0.00000000
 <Dec10-2020> <14:08:02>      2      0.03155047      0.03012130
 <Dec10-2020> <14:08:02>      3      0.00862036      0.00834572    100.0
 <Dec10-2020> <14:08:03>      4      0.00173320      0.00171953      0.7
 <Dec10-2020> <14:08:03>      5      0.00004372      0.00003982      0.0
 <Dec10-2020> <14:08:03>      6      0.00000239      0.00000216      0.0
 <Dec10-2020> <14:08:03>      7      0.00000001      0.00000001      0.0
 <Dec10-2020> <14:08:03>  SCF converged
 <Dec10-2020> <14:08:03>      8      0.00000000      0.00000000      0.0
 <Dec10-2020> <14:08:03>  >>>> POPAN
 <Dec10-2020> <14:08:03>  >>>> DEBYE
 <Dec10-2020> <14:08:03>  NORMAL TERMINATION
 <Dec10-2020> <14:08:03>  END
 <Dec10-2020> <14:08:03>  DIRAC 2017  RunTime: Dec10-2020 14:08:03  Nodes: 1  Procs: 1
 <Dec10-2020> <14:08:03>  NORMAL TERMINATION
 <Dec10-2020> <14:08:03>  END
 <Dec10-2020> <14:08:03>  ADF 2017  RunTime: Dec10-2020 14:08:03  Nodes: 1  Procs: 1
 <Dec10-2020> <14:08:03>  Nitrogen (TZ2P, 1s frozen)
 <Dec10-2020> <14:08:03>  RunType   : CREATE
 <Dec10-2020> <14:08:03>  Net Charge: 0 (Nuclei minus Electrons)
 <Dec10-2020> <14:08:03>  Symmetry  : ATOM
  Coordinates
    Atom         X           Y           Z   (Angstrom)
    1.N         0.000000    0.000000    0.000000
 <Dec10-2020> <14:08:03>  >>>> CORORT
 <Dec10-2020> <14:08:03>  >>>> FITINT
 <Dec10-2020> <14:08:03>  >>>> CLSMAT
 <Dec10-2020> <14:08:03>  >>>> ORTHON
 <Dec10-2020> <14:08:03>  >>>> GENPT
 <Dec10-2020> <14:08:03>  Block Length=  68
 <Dec10-2020> <14:08:03>  >>>> PTBAS
 <Dec10-2020> <14:08:03>  >>>> CYCLE
 <Dec10-2020> <14:08:04>              |Error|         MaxErr       Wt(A-DIIS)
 <Dec10-2020> <14:08:04>      1      0.00000000      0.00000000
 <Dec10-2020> <14:08:04>      2      2.83319777      1.83798856
 <Dec10-2020> <14:08:04>      3      1.57643681      1.19049627    100.0
 <Dec10-2020> <14:08:04>      4      0.27464764      0.17793606    100.0
 <Dec10-2020> <14:08:04>      5      0.31772215      0.21876709    100.0
 <Dec10-2020> <14:08:04>      6      0.00328555      0.00230030      1.3
 <Dec10-2020> <14:08:04>      7      0.00006766      0.00003768      0.0
 <Dec10-2020> <14:08:04>      8      0.00000960      0.00000665      0.0
 <Dec10-2020> <14:08:04>      9      0.00000004      0.00000003      0.0
 <Dec10-2020> <14:08:04>     10      0.00000000      0.00000000      0.0
 <Dec10-2020> <14:08:04>  SCF converged
 <Dec10-2020> <14:08:04>     11      0.00000000      0.00000000      0.0
 <Dec10-2020> <14:08:04>  >>>> POPAN
 <Dec10-2020> <14:08:04>  >>>> DEBYE
 <Dec10-2020> <14:08:04>  NORMAL TERMINATION
 <Dec10-2020> <14:08:04>  END
 <Dec10-2020> <14:08:04>  DIRAC 2017  RunTime: Dec10-2020 14:08:04  Nodes: 1  Procs: 1
 <Dec10-2020> <14:08:04>  NORMAL TERMINATION
 <Dec10-2020> <14:08:04>  END
 <Dec10-2020> <14:08:04>  ADF 2017  RunTime: Dec10-2020 14:08:04  Nodes: 1  Procs: 1
 <Dec10-2020> <14:08:04>  Sulphur (TZ2P, 1s frozen)
 <Dec10-2020> <14:08:04>  RunType   : CREATE
 <Dec10-2020> <14:08:04>  Net Charge: 0 (Nuclei minus Electrons)
 <Dec10-2020> <14:08:04>  Symmetry  : ATOM
  Coordinates
    Atom         X           Y           Z   (Angstrom)
    1.S         0.000000    0.000000    0.000000
 <Dec10-2020> <14:08:04>  >>>> CORORT
 <Dec10-2020> <14:08:04>  >>>> FITINT
 <Dec10-2020> <14:08:04>  >>>> CLSMAT
 <Dec10-2020> <14:08:04>  >>>> ORTHON
 <Dec10-2020> <14:08:04>  >>>> GENPT
 <Dec10-2020> <14:08:04>  Block Length=  81
 <Dec10-2020> <14:08:04>  >>>> PTBAS
 <Dec10-2020> <14:08:04>  >>>> CYCLE
 <Dec10-2020> <14:08:04>              |Error|         MaxErr       Wt(A-DIIS)
 <Dec10-2020> <14:08:04>      1      0.00000000      0.00000000
 <Dec10-2020> <14:08:04>      2     22.42759179      6.68355878    100.0
 <Dec10-2020> <14:08:04>      3      8.97912759      3.07281693    100.0
 <Dec10-2020> <14:08:04>      4      4.98707427      1.96963381    100.0
 <Dec10-2020> <14:08:04>      5      1.25301661      0.51996078    100.0
 <Dec10-2020> <14:08:04>      6      0.94192877      0.37676315    100.0
 <Dec10-2020> <14:08:04>      7      0.11372786      0.04811533     47.6
 <Dec10-2020> <14:08:04>      8      0.04165931      0.01754762     16.7
 <Dec10-2020> <14:08:05>      9      0.00527365      0.00227358      1.3
 <Dec10-2020> <14:08:05>     10      0.00005604      0.00002491      0.0
 <Dec10-2020> <14:08:05>     11      0.00000034      0.00000017      0.0
 <Dec10-2020> <14:08:05>     12      0.00000001      0.00000000      0.0
 <Dec10-2020> <14:08:05>  SCF converged
 <Dec10-2020> <14:08:05>     13      0.00000000      0.00000000      0.0
 <Dec10-2020> <14:08:05>  >>>> POPAN
 <Dec10-2020> <14:08:05>  >>>> DEBYE
 <Dec10-2020> <14:08:05>  NORMAL TERMINATION
 <Dec10-2020> <14:08:05>  END
NORMAL TERMINATION

 *******************************************************************************
 *                                                                             *
 *  -------------------------------------                                      *
 *   Amsterdam Density Functional  (ADF)         2017                          *
 *  -------------------------------------                                      *
 *                                               r58813 2017-04-12             *
 *                                                                             *
 *                                                                             *
 *                            =====================                            *
 *                            |                   |                            *
 *                            |     D I R A C     |                            *
 *                            |                   |                            *
 *                            =====================                            *
 *                                                                             *
 *                                                                             *
 *   Online information and documentation:  https://www.scm.com/support/       *
 *   E-mail:  support@scm.com   info@scm.com                                   *
 *                                                                             *
 *   Scientific publications using ADF results must be properly referenced     *
 *   See the User Manuals (or the web site) for recommended citations          *
 *   The terms and conditions of the End User License Agreement apply to       *
 *   the use of ADF, https://www.scm.com/license-terms/                        *
 *                                                                             *
 **********************  x86_64_linux_intel / intelmpi  ************************
 
 Licensed to: SURF-SARA, Comp. & Networking Services / Amsterdam / NL
 SCM User ID: u7409
  
 DIRAC 2017  RunTime: Dec10-2020 14:08:05  Nodes: 1  Procs: 1

 Temporary files are created in /scratch/kid_0.KFZD93

1
 CARBON ATOM 1s CORE RELATIVISTIC, Point Nuc, A and c from li
 N J RN H ZN XION ANUC CLIGHT
 5000    4100.00000000197.36710137  6.00000000  0.00000000   12.000000  0.1370360E+03
  PH   PHI     EPS        DEL        DELRVR
  0.30  0.30     2500.00  0.00001000  0.00001000
 IDIRC  NC1  NDEBU NPRIN  IPUN IRCOR IWCOR
   1   300     0     0     0     0     1
   XALPHA      XLATTER      RNUC
  0.70000000  0.00000000  0.00000000 Point Charge
   XN   XL   XJ      XE          XZ      XDELL
  1.0  0.0  0.5      -5.000       2.000     0.00000
  2.0  0.0  0.5      -1.000       2.000     0.00000
  2.0  1.0  0.5      -1.000       2.000     0.00000
  2.0  1.0  1.5      -1.000       0.000     0.00000
 ICORP=  0  NPCL=  0  DEMP=0.00  PEPS=0.000000
 R(1)=  0.1000000E-08 D=  0.1005080E+01 RNUC=  0.0000000E+00
 converged at cycle   26  DENSITY AVERAGING    0.3000
  MAXIMUM ERROR IN R.V(R) IS   0.55010513E-05
 Q,EY,EV,EZ,ESUM,ETOT,RHO  0.600000E+01 -0.610129E+01 -0.585189E+02 -0.876464E+02 -0.211985E+02 -0.372876E+02  0.164808E-14


 DIRAC CALCULATION
1                    CARBON ATOM 1s CORE RELATIVISTIC, Point Nuc, A and c from libtc


 EXCHANGE COEFFICIENT=  0.7000000           TAIL CORRECTION=  0.           NUCLEAR RADIUS=  0.000E+00
0                       ORBITAL    N    L    J     ELECTRONS     EIGENVALUE                DELTA OF EIGENV.

                          1S1/2  1.0  0.0  0.5     2.000       -0.9959611E+01                 0.1355092E-04
                          2S1/2  2.0  0.0  0.5     2.000       -0.4708542E+00                 0.1106918E-05
                          2P1/2  2.0  1.0  0.5     2.000       -0.1687896E+00                 0.8770186E-06
                          2P3/2  2.0  1.0  1.5     0.000       -0.1684646E+00                 0.8770830E-06


                                        NUCLEAR CHARGE=    6.000000
                            INTEGRAL OF CHARGE DENSITY=    6.000000
                           SUM OF THE ORBITAL ENERGIES=    -21.1985
                                          TOTAL ENERGY=    -37.2876
                                        KINETIC ENERGY=     37.3204
                             NUCLEAR ATTRACTION ENERGY=    -87.6464
                             ELECTRON REPULSION ENERGY=     17.6144
                                       EXCHANGE ENERGY=     -4.5760

 *******************************************************************************

                             D I R A C   E X I T
 NORMAL TERMINATION


 =================
 Timing Statistics
 =================
  
 Total Used :                     CPU=        0.08      System=        0.00     Elapsed=        0.11

 Calls  Section                     ( Mean, Percentage )
 ---------------------------------------------------------------------------------------------------
     2  ><      ................      0.00    0.01             0.00    0.14             0.00    0.01
     1  EXIT PROCEDURE .........      0.08   99.99             0.00   99.86             0.11   99.99


 Currently Open Files (EXIT00)
 ====================

 Unit    Access Format  Status   Type       Ident (file)
 -------------------------------------------------------
   3      SEQ    FORM   TRANSP  NORMAL      LOGFILE
                                          ( logfile )


 Buffered I/O statistics
 =======================
 Memory available:                     67108864
 Number of records fitting in memory:     16131
 Input : 100.0% of                            0  *4k bytes
 Output: 100.0% of                            0  *4k bytes
 Records from serial files evicted:           0
                    others evicted:           0
 Hash table lookups:          0 with          0 conflicts (100.00%)
NORMAL TERMINATION

Create C   file=TZ2P-C.1s
XC
  GGA PBE
End
relativistic ZORA
HartreeFock
Corepotentials t12.rel
End Input

 *******************************************************************************
 *                                                                             *
 *  -------------------------------------                                      *
 *   Amsterdam Density Functional  (ADF)         2017                          *
 *  -------------------------------------                                      *
 *                                               r58813 2017-04-12             *
 *                                                                             *
 *                                                                             *
 *                              =================                              *
 *                              |               |                              *
 *                              |     A D F     |                              *
 *                              |               |                              *
 *                              =================                              *
 *                                                                             *
 *                                                                             *
 *   Online information and documentation:  https://www.scm.com/support/       *
 *   E-mail:  support@scm.com   info@scm.com                                   *
 *                                                                             *
 *   Scientific publications using ADF results must be properly referenced     *
 *   See the User Manuals (or the web site) for recommended citations          *
 *   The terms and conditions of the End User License Agreement apply to       *
 *   the use of ADF, https://www.scm.com/license-terms/                        *
 *                                                                             *
 **********************  x86_64_linux_intel / intelmpi  ************************
 
 Licensed to: SURF-SARA, Comp. & Networking Services / Amsterdam / NL
 SCM User ID: u7409
  
 ADF 2017  RunTime: Dec10-2020 14:08:05  Nodes: 1  Procs: 1

 Temporary files are created in /scratch/kid_0.RgVYbi

 Carbon (TZ2P, 1s frozen)


 ===========================
 A T T A C H E D   F I L E S
 ===========================
  
 CREATE - Data File:    TZ2P-C.1s
                        Carbon (TZ2P, 1s frozen)
 Core Potentials:
         file : t12.rel


 ===============================
 M O D E L   P A R A M E T E R S
 ===============================
  
 DENSITY FUNCTIONAL POTENTIAL (scf)
    LDA:                               PW92                                    == Not Default ==
    Gradient Corrections:              PBEc PBEx                               == Not Default ==

 SPIN  (restricted / unrestr.)
    Molecule:                          Restricted                               

 OTHER ASPECTS
    Relativistic Corrections:          scalar (ZORA,MAPA)                      == Not Default ==

    Nuclear Charge Density Model:      Point Charge Nuclei                      
    Core Treatment:                    Frozen Orbital(s)                        

    Hyperfine or Zeeman Interaction:   ---                                      


 =====================================
 S Y M M E T R Y ,   E L E C T R O N S
 =====================================
  
 Symmetry: ATOM

 Irreducible Representations, including subspecies
 -------------------------------------------------
 S
 P:x  P:y  P:z
 D:z2  D:x2-y2  D:xy  D:xz  D:yz
 F:z3  F:z  F:xyz  F:z2x  F:z2y  F:x  F:y


 Configuration of Valence Electrons
 ==================================

          Occupation Numbers
          -------------------------------------------------
 S        2
 P        2
 D        0
 F        0
          -------------------------------------------------

 Total:   4

 Net Charge: 0 (Nuclei minus Electrons)

 Preset values for MO occupations will be applied through SCF cycle no. 1000000
 Thereafter, the program will assign electrons to MOs that are spatially
 similar to the occupied MOs in a "reference" cycle ("KeepOrbitals").
 The reference cycle is always the PREVIOUS cycle: it will evolve with
 the SCF procedure.


 ================================
 (Slater-type)  F U N C T I O N S  ***  (Basis and Fit)  ***
 ================================
  

 Atom Type    1  (C)
 ==============

 Valence Basis Sets:   9
 -----------------------
   1 S    5.400000
   2 S    1.280000
   2 S    2.100000
   2 S    4.600000
   2 P    0.820000
   2 P    1.480000
   2 P    2.940000
   3 D    2.200000
   4 F    3.300000

 Frozen Core Shells
 ------------------
    S:  1


 BAS: List of all Elementary Cartesian Basis Functions
 =====================================================

 The numbering in the list below (to the right of the function characteristics) is referred
 to in print-outs of MO eigenvectors and Mulliken populations in the BAS representation
 (as contrasted to the SFO representation).

 Notes:
 1. The functions are characterized by a polynomial prefactor (powers of x,y,z and r) and
    an exponential decay factor alpha.
 2. Since the basis sets are specific for an atom TYPE, the individual functions occur on
    all atoms of that type.
 3. The word 'Core' in the left margin signals that it is a Core Function (CF) : not a
    degree of freedom in the valence set, but only used to ensure orthogonalization of
    the other valence basis functions on the frozen Core Orbitals.


 (power of) X  Y  Z  R     Alpha  on Atom
            ==========     =====     ==========

 C                                    1
                                  ---------------------------------------------------------------------------
    Core    0  0  0  0     5.400      1
            0  0  0  1     1.280      2
            0  0  0  1     2.100      3
            0  0  0  1     4.600      4
            1  0  0  0     0.820      5
            0  1  0  0     0.820      6
            0  0  1  0     0.820      7
            1  0  0  0     1.480      8
            0  1  0  0     1.480      9
            0  0  1  0     1.480     10
            1  0  0  0     2.940     11
            0  1  0  0     2.940     12
            0  0  1  0     2.940     13
            2  0  0  0     2.200     14
            1  1  0  0     2.200     15
            1  0  1  0     2.200     16
            0  2  0  0     2.200     17
            0  1  1  0     2.200     18
            0  0  2  0     2.200     19
            3  0  0  0     3.300     20
            2  1  0  0     3.300     21
            2  0  1  0     3.300     22
            1  2  0  0     3.300     23
            1  1  1  0     3.300     24
            1  0  2  0     3.300     25
            0  3  0  0     3.300     26
            0  2  1  0     3.300     27
            0  1  2  0     3.300     28
            0  0  3  0     3.300     29

 Total number of charge fitting functions (nprimf)        82
 Total number of Cartesian basis functions (naos)         29
 Total number of Cartesian core functions  (ncos)          1


 BAS: List of all Elementary Cartesian Basis Functions
 =====================================================

 The numbering in the list below (to the right of the function characteristics) is referred
 to in print-outs of MO eigenvectors and Mulliken populations in the BAS representation
 (as contrasted to the SFO representation).

 Notes:
 1. The functions are characterized by a polynomial prefactor (powers of x,y,z and r) and
    an exponential decay factor alpha.
 2. Since the basis sets are specific for an atom TYPE, the individual functions occur on
    all atoms of that type.
 3. The word 'Core' in the left margin signals that it is a Core Function (CF) : not a
    degree of freedom in the valence set, but only used to ensure orthogonalization of
    the other valence basis functions on the frozen Core Orbitals.


 (power of) X  Y  Z  R     Alpha  on Atom
            ==========     =====     ==========

 C                                    1
                                  ---------------------------------------------------------------------------
    Core    0  0  0  0     5.400      1
            0  0  0  1     1.280      2
            0  0  0  1     2.100      3
            0  0  0  1     4.600      4
            1  0  0  0     0.820      5
            0  1  0  0     0.820      6
            0  0  1  0     0.820      7
            1  0  0  0     1.480      8
            0  1  0  0     1.480      9
            0  0  1  0     1.480     10
            1  0  0  0     2.940     11
            0  1  0  0     2.940     12
            0  0  1  0     2.940     13
            2  0  0  0     2.200     14
            1  1  0  0     2.200     15
            1  0  1  0     2.200     16
            0  2  0  0     2.200     17
            0  1  1  0     2.200     18
            0  0  2  0     2.200     19
            3  0  0  0     3.300     20
            2  1  0  0     3.300     21
            2  0  1  0     3.300     22
            1  2  0  0     3.300     23
            1  1  1  0     3.300     24
            1  0  2  0     3.300     25
            0  3  0  0     3.300     26
            0  2  1  0     3.300     27
            0  1  2  0     3.300     28
            0  0  3  0     3.300     29
1
 ***************************************************************************************************


                                              ***********************
                                              *  T E C H N I C A L  *
                                              ***********************
  


 =============================================================
 P A R A L L E L I Z A T I O N  and  V E C T O R I Z A T I O N
 =============================================================
  
 Nr of parallel processes:                                1
 Maximum vector length in NumInt loops:                 128

 IO buffersize (Mb):                                     64.000000


 =====================
 S C F   U P D A T E S
 =====================
  
 Max. nr. of cycles:                               300
 Convergence criterion:                              0.0000000100
   secondary criterion:                              0.0000000100

 Mix parameter (when DIIS does not apply):           0.2000000000
 Special mix parameter for the first cycle:          1.0000000000
 Mixed ADIIS+DIIS will be used
    Max number of expansion vectors:                10
    Pure ADIIS when Max([F,P]) is above              0.1000000000
    Pure DIIS when Max([F,P]) is below               0.0010000000
 Automatic ElectronSmearing (in case of problematic SCF convergence) disabled


 =================
 P R E C I S I O N  ***  (General: NumInt, NeglectFunctionTails, ...)  ***
 =================
  

 NumInt:           Target precision:                12.0000000000
 -------           Initial precision:               10.0000000000
                   Min. precision (optimization):   10.0000000000

 Neglect Functions:          Basis functions:        0.1000000000E-13
 ------------------          Fit functions:          0.1000000000E-13


 ===========================
 L I N E A R   S C A L I N G
 ===========================
  

 Cut-off radii density fit:                        0.1000000000E-97
 Overlap cut-off criterion AO matrix elements:     0.1000000000E-97
 Cut-offs for Coulomb potential and fitted density:0.1000000000E-97
 Cut-off criterion for Coulomb multipole terms:    0.1000000000E-97
 Progressive Convergence parameter:                 0.000000000    
1
 ***************************************************************************************************


                                            ***************************
                                            *  C O M P U T A T I O N  *
                                            ***************************
  

 Number of elements of the density matrix on this node (used, total):       435       435


 ===========================================
 Numerical Integration : Fuzzy Cells (Becke)
 ===========================================
  
 Becke grid quality: VERYGOOD       
  
 Lebedev angular grid order:             min:  13 max:  41
 Nr. of radial points:                   min:  72 max:  72

 Total nr. of points:         72
 Nr. of blocks:                1
 Block length:                72
 Nr. of dummy points:          0


 Test of Precision of the Numerical Integration Grid
 ===================================================

 Integral of the Total Core Density:                   1.99999999338073
 Relative Error:                                      -3.310E-09


 ========================
 Density Fitting (zlmFit)
 ========================
  
 ZlmFit Fit Quality: VERYGOOD       
  
 Max L-expansion:                        min:   0 max:   0
 Nr. of radial interpolation points:     min: 160 max: 160


 =====
 S C F  ***  ScaSCF  ***
 =====
  

 CYCLE    1
 SCF Error: norm([F,P])=      0.000000000000, max([F,P])=      0.000000000000
 orbitals (Q,E):
 ---------------
 S :1...3            ( 2.00    -2.5692)  ( 0.00    -1.0174)  ( 0.00     7.2796)
 P :1...3            ( 2.00    -2.3217)  ( 0.00    -0.9251)  ( 0.00    -0.0030)
 D :1...1            ( 0.00    -0.6267)
 F :1...1            ( 0.00     1.9961)

 CYCLE    2
 SCF Error: norm([F,P])=      1.588399888967, max([F,P])=      1.243959351543
 orbitals (Q,E):
 ---------------
 S :1...2            ( 2.00    -0.1717)  ( 0.00     0.7478)
 P :1...2            ( 2.00     0.0573)  ( 0.00     0.4149)
 D :1...1            ( 0.00     1.5814)
 F :1...1            ( 0.00     4.4142)

 CYCLE    3
  SDIIS (wt  0.000):  0.3215  0.6785
 A-DIIS (wt  1.000):  0.3217  0.6783
  DIIS coefficients:  0.3217  0.6783
 SCF Error: norm([F,P])=      0.835164933187, max([F,P])=      0.696959722204
 orbitals (Q,E):
 ---------------
 S :1...2            ( 2.00    -0.6548)  ( 0.00     0.3319)
 P :1...2            ( 2.00    -0.3390)  ( 0.00     0.1125)
 D :1...1            ( 0.00     1.0911)
 F :1...1            ( 0.00     3.8482)

 CYCLE    4
  SDIIS (wt  0.000):  0.1974  0.8026
 A-DIIS (wt  1.000):  0.0000  1.0000
  DIIS coefficients:  0.0000  1.0000
 SCF Error: norm([F,P])=      0.211930829960, max([F,P])=      0.169888557560
 orbitals (Q,E):
 ---------------
 S :1...2            ( 2.00    -0.4260)  ( 0.00     0.4963)
 P :1...2            ( 2.00    -0.1224)  ( 0.00     0.2118)
 D :1...1            ( 0.00     1.3128)
 F :1...1            ( 0.00     4.0971)

 CYCLE    5
  SDIIS (wt  0.000): -0.0390  0.4047  0.6343
 A-DIIS (wt  1.000):  0.0000  0.4243  0.5757
  DIIS coefficients:  0.0000  0.4243  0.5757
 SCF Error: norm([F,P])=      0.184808617934, max([F,P])=      0.149673115184
 orbitals (Q,E):
 ---------------
 S :1...2            ( 2.00    -0.5162)  ( 0.00     0.4284)
 P :1...2            ( 2.00    -0.2041)  ( 0.00     0.1676)
 D :1...1            ( 0.00     1.2258)
 F :1...1            ( 0.00     3.9972)

 CYCLE    6
  SDIIS (wt  0.876): -0.0007 -0.0265  0.0592  0.9681
 A-DIIS (wt  0.124):  0.0000  0.0000  0.0000  1.0000
  DIIS coefficients: -0.0006 -0.0233  0.0519  0.9720
 SCF Error: norm([F,P])=      0.016472831098, max([F,P])=      0.013230609839
 orbitals (Q,E):
 ---------------
 S :1...2            ( 2.00    -0.5063)  ( 0.00     0.4356)
 P :1...2            ( 2.00    -0.1948)  ( 0.00     0.1715)
 D :1...1            ( 0.00     1.2353)
 F :1...1            ( 0.00     4.0080)

 CYCLE    7
  SDIIS (wt  0.994):  0.0004  0.0080 -0.0178 -0.1481  1.1574
 A-DIIS (wt  0.006):  0.0000  0.0000  0.0000  0.0000  1.0000
  DIIS coefficients:  0.0004  0.0080 -0.0177 -0.1472  1.1565
 SCF Error: norm([F,P])=      0.001905320648, max([F,P])=      0.001549492888
 orbitals (Q,E):
 ---------------
 S :1...2            ( 2.00    -0.5072)  ( 0.00     0.4350)
 P :1...2            ( 2.00    -0.1957)  ( 0.00     0.1711)
 D :1...1            ( 0.00     1.2345)
 F :1...1            ( 0.00     4.0070)

 CYCLE    8
  SDIIS (wt  1.000):  0.0002 -0.0002 -0.0044  0.0092  0.9952
  DIIS coefficients:  0.0002 -0.0002 -0.0044  0.0092  0.9952
 SCF Error: norm([F,P])=      0.000014101326, max([F,P])=      0.000011368012
 orbitals (Q,E):
 ---------------
 S :1...2            ( 2.00    -0.5072)  ( 0.00     0.4350)
 P :1...2            ( 2.00    -0.1957)  ( 0.00     0.1711)
 D :1...1            ( 0.00     1.2345)
 F :1...1            ( 0.00     4.0070)

 CYCLE    9
  SDIIS (wt  1.000): -0.0000 -0.0006 -0.0188  1.0194
  DIIS coefficients: -0.0000 -0.0006 -0.0188  1.0194
 SCF Error: norm([F,P])=      0.000000372617, max([F,P])=      0.000000306168
 orbitals (Q,E):
 ---------------
 S :1...2            ( 2.00    -0.5072)  ( 0.00     0.4350)
 P :1...2            ( 2.00    -0.1957)  ( 0.00     0.1711)
 D :1...1            ( 0.00     1.2345)
 F :1...1            ( 0.00     4.0070)

 CYCLE   10
  SDIIS (wt  1.000): -0.0000  0.0034  0.9966
  DIIS coefficients: -0.0000  0.0034  0.9966
 SCF Error: norm([F,P])=      0.000000001551, max([F,P])=      0.000000001265
 orbitals (Q,E):
 ---------------
 S :1...2            ( 2.00    -0.5072)  ( 0.00     0.4350)
 P :1...2            ( 2.00    -0.1957)  ( 0.00     0.1711)
 D :1...1            ( 0.00     1.2345)
 F :1...1            ( 0.00     4.0070)

 SCF CONVERGED

 CYCLE   11
1
 ***************************************************************************************************


                                                *******************
                                                *  R E S U L T S  *
                                                *******************
  
  
 Hartree-Fock exchange energy:   -1.00241546229594     
 *** Setting up for NEW gradients in Focky
 *** Using FIT density in Focky

 Scaled ZORA Orbital Energies, per Irrep and Spin:
 =================================================
                        Occup              E (au)              E (eV)       Diff (eV) with prev. cycle
                        -----      --------------------        ------       --------------------------
 S
               1        2.000     -0.50715776408090E+00       -13.800              -1.49E-10
               2        0.000      0.43497730907763E+00        11.836
               3        0.000      0.99350900408098E+01       270.348
 P
               1        2.000     -0.19567480274567E+00        -5.325              -1.41E-10
               2        0.000      0.17109489205977E+00         4.656
               3        0.000      0.20249908577505E+01        55.103
 D
               1        0.000      0.12344587287095E+01        33.591
 F
               1        0.000      0.40069776225730E+01       109.035


 Partially Occupied:
               1 P                -0.19567480274567E+00
  
 HOMO :        1 S                -0.50715776408090E+00
 LUMO :        2 P                 0.17109489205977E+00
  


 Orbital Energies, all Irreps
 ========================================

 Irrep        no.  (spin)   Occup              E (au)                E (eV)
 ---------------------------------------------------------------------------
 S             1             2.00       -0.50715776408090E+00       -13.8005
 P             1             2.00       -0.19567480274567E+00        -5.3246
 P             2             0.00        0.17109489205977E+00         4.6557
 S             2             0.00        0.43497730907763E+00        11.8363
 D             1             0.00        0.12344587287095E+01        33.5913
 P             3             0.00        0.20249908577505E+01        55.1028
 F             1             0.00        0.40069776225730E+01       109.0354
 S             3             0.00        0.99350900408098E+01       270.3476


 Scaled ZORA Orbital Energies of the Core Orbitals:
 ==================================================

 (Note that the atoms are grouped by atomtype, see the labels, and may hence NOT be in input order)

 AtomType  Orbital  Atom                   E (au)                        E (eV)
 --------  -------  ----           --------------------        ----------------
 C           1S        1          -0.10058479630812E+02                -273.705


 =======================================
 M U L L I K E N   P O P U L A T I O N S
 =======================================
  
 The survey below gives for each atom:
 a) the total charge (Z minus electrons)
 b) the net spin polarization (nr of electrons spin-A minus spin-B)
 c) for each spin the atomic electron valence density (integrated) per L-value.

 Atom              Charge    Spin density          S         P         D         F
 ----              ------    ------------       ------    ------    ------    ------
 1 C               0.0000                       2.0000    2.0000    0.0000    0.0000

 Populations of individual BAS functions
 ----------------------------------------
 1 C            0.0007  0.9631  1.0755 -0.0394  0.1731  0.1731  0.1731  0.3899  0.3899  0.3899
                0.1037  0.1037  0.1037  0.0000  0.0000  0.0000  0.0000  0.0000  0.0000  0.0000
                0.0000  0.0000  0.0000  0.0000  0.0000  0.0000  0.0000  0.0000  0.0000

 Gross Charges per Atom (Z minus electrons)
 ==========================================
             0.0000
 Net Total:  0.00000000


 =======================================================================
 Electrostatic potential at the Nuclei due to electrons and other nuclei
 =======================================================================
  
         Atom                  Potential
         ----                  ---------
     1)   C                  14.62071621
 
 
 ========================
 No memory problems found
 ========================
 
 Maximum number of active allocate calls:         493
 
 *******************************************************************************

                             A D F   E X I T
 NORMAL TERMINATION


 =================
 Timing Statistics
 =================
  
 Total Used :                     CPU=        0.28      System=        0.03     Elapsed=        0.36

 Calls  Section                     ( Mean, Percentage )
 ---------------------------------------------------------------------------------------------------
     3  ><      ................      0.00    0.00             0.00    2.94             0.00    0.91
     1  INIT    ................      0.00    1.55             0.01   36.03             0.02    6.83
     1  GEOMET  ................      0.00    0.77             0.00   16.43             0.01    3.48
     1  INPUTA  ................      0.00    0.00             0.00    5.99             0.00    0.65
     1  MAINSY  ................      0.00    1.03             0.01   17.51             0.01    3.76
     1  SYMFIT  ................      0.00    0.17             0.00    1.58             0.00    0.25
     1  CORORT  ................      0.00    0.18             0.00    1.72             0.00    0.68
     1  SYMORB  ................      0.00    0.16             0.00    1.52             0.00    0.24
     1  FITINT  ................      0.01    2.27             0.00    6.37             0.01    2.59
     1  CLSMAT  ................      0.00    0.06             0.00    0.49             0.00    0.40
     1  ORTHON  ................      0.00    0.23             0.00    1.92             0.00    0.64
     1  GENPT   ................      0.01    2.53             0.00    6.57             0.01    3.17
     1  PTBAS   ................      0.00    1.25             0.00    0.93             0.00    1.37
    11  FOCKY   ................      0.02   71.78             0.00    0.00             0.02   55.50
    11  FOCKTR  ................      0.00    2.31             0.00    0.00             0.00    1.76
    11  SDIIS   ................      0.00    4.64             0.00    0.00             0.00    8.00
     1  COREPS  ................      0.01    4.86             0.00    0.00             0.01    3.70
     1  POPAN   ................      0.00    1.33             0.00    0.00             0.01    1.41
     1  DEBYE   ................      0.00    0.17             0.00    0.00             0.00    0.41
     1  EXIT PROCEDURE .........      0.01    4.73             0.00    0.00             0.02    4.24


 Currently Open Files (EXIT00)
 ====================

 Unit    Access Format  Status   Type       Ident (file)
 -------------------------------------------------------
   3      SEQ    FORM   TRANSP  NORMAL      LOGFILE
                                          ( logfile )


 Buffered I/O statistics
 =======================
 Memory available:                     67108864
 Number of records fitting in memory:     16131
 Input :   0.1% of                        30338  *4k bytes
 Output:  15.9% of                         1476  *4k bytes
 Records from serial files evicted:           0
                    others evicted:           0
 Hash table lookups:      78517 with          0 conflicts (  0.00%)

 ***************************************************************************************************
 (LOGFILE)
 <Dec10-2020> <14:08:02>  DIRAC 2017  RunTime: Dec10-2020 14:08:02  Nodes: 1  Procs: 1
 <Dec10-2020> <14:08:02>  NORMAL TERMINATION
 <Dec10-2020> <14:08:02>  END
 <Dec10-2020> <14:08:02>  ADF 2017  RunTime: Dec10-2020 14:08:02  Nodes: 1  Procs: 1
 <Dec10-2020> <14:08:02>  Hydrogen (TZ2P)
 <Dec10-2020> <14:08:02>  RunType   : CREATE
 <Dec10-2020> <14:08:02>  Net Charge: 0 (Nuclei minus Electrons)
 <Dec10-2020> <14:08:02>  Symmetry  : ATOM
  Coordinates
    Atom         X           Y           Z   (Angstrom)
    1.H         0.000000    0.000000    0.000000
 <Dec10-2020> <14:08:02>  >>>> CORORT
 <Dec10-2020> <14:08:02>  >>>> FITINT
 <Dec10-2020> <14:08:02>  >>>> CLSMAT
 <Dec10-2020> <14:08:02>  >>>> ORTHON
 <Dec10-2020> <14:08:02>  >>>> GENPT
 <Dec10-2020> <14:08:02>  Block Length=  64
 <Dec10-2020> <14:08:02>  >>>> PTBAS
 <Dec10-2020> <14:08:02>  >>>> CYCLE
 <Dec10-2020> <14:08:02>              |Error|         MaxErr       Wt(A-DIIS)
 <Dec10-2020> <14:08:02>      1      0.00000000      0.00000000
 <Dec10-2020> <14:08:02>      2      0.03155047      0.03012130
 <Dec10-2020> <14:08:02>      3      0.00862036      0.00834572    100.0
 <Dec10-2020> <14:08:03>      4      0.00173320      0.00171953      0.7
 <Dec10-2020> <14:08:03>      5      0.00004372      0.00003982      0.0
 <Dec10-2020> <14:08:03>      6      0.00000239      0.00000216      0.0
 <Dec10-2020> <14:08:03>      7      0.00000001      0.00000001      0.0
 <Dec10-2020> <14:08:03>  SCF converged
 <Dec10-2020> <14:08:03>      8      0.00000000      0.00000000      0.0
 <Dec10-2020> <14:08:03>  >>>> POPAN
 <Dec10-2020> <14:08:03>  >>>> DEBYE
 <Dec10-2020> <14:08:03>  NORMAL TERMINATION
 <Dec10-2020> <14:08:03>  END
 <Dec10-2020> <14:08:03>  DIRAC 2017  RunTime: Dec10-2020 14:08:03  Nodes: 1  Procs: 1
 <Dec10-2020> <14:08:03>  NORMAL TERMINATION
 <Dec10-2020> <14:08:03>  END
 <Dec10-2020> <14:08:03>  ADF 2017  RunTime: Dec10-2020 14:08:03  Nodes: 1  Procs: 1
 <Dec10-2020> <14:08:03>  Nitrogen (TZ2P, 1s frozen)
 <Dec10-2020> <14:08:03>  RunType   : CREATE
 <Dec10-2020> <14:08:03>  Net Charge: 0 (Nuclei minus Electrons)
 <Dec10-2020> <14:08:03>  Symmetry  : ATOM
  Coordinates
    Atom         X           Y           Z   (Angstrom)
    1.N         0.000000    0.000000    0.000000
 <Dec10-2020> <14:08:03>  >>>> CORORT
 <Dec10-2020> <14:08:03>  >>>> FITINT
 <Dec10-2020> <14:08:03>  >>>> CLSMAT
 <Dec10-2020> <14:08:03>  >>>> ORTHON
 <Dec10-2020> <14:08:03>  >>>> GENPT
 <Dec10-2020> <14:08:03>  Block Length=  68
 <Dec10-2020> <14:08:03>  >>>> PTBAS
 <Dec10-2020> <14:08:03>  >>>> CYCLE
 <Dec10-2020> <14:08:04>              |Error|         MaxErr       Wt(A-DIIS)
 <Dec10-2020> <14:08:04>      1      0.00000000      0.00000000
 <Dec10-2020> <14:08:04>      2      2.83319777      1.83798856
 <Dec10-2020> <14:08:04>      3      1.57643681      1.19049627    100.0
 <Dec10-2020> <14:08:04>      4      0.27464764      0.17793606    100.0
 <Dec10-2020> <14:08:04>      5      0.31772215      0.21876709    100.0
 <Dec10-2020> <14:08:04>      6      0.00328555      0.00230030      1.3
 <Dec10-2020> <14:08:04>      7      0.00006766      0.00003768      0.0
 <Dec10-2020> <14:08:04>      8      0.00000960      0.00000665      0.0
 <Dec10-2020> <14:08:04>      9      0.00000004      0.00000003      0.0
 <Dec10-2020> <14:08:04>     10      0.00000000      0.00000000      0.0
 <Dec10-2020> <14:08:04>  SCF converged
 <Dec10-2020> <14:08:04>     11      0.00000000      0.00000000      0.0
 <Dec10-2020> <14:08:04>  >>>> POPAN
 <Dec10-2020> <14:08:04>  >>>> DEBYE
 <Dec10-2020> <14:08:04>  NORMAL TERMINATION
 <Dec10-2020> <14:08:04>  END
 <Dec10-2020> <14:08:04>  DIRAC 2017  RunTime: Dec10-2020 14:08:04  Nodes: 1  Procs: 1
 <Dec10-2020> <14:08:04>  NORMAL TERMINATION
 <Dec10-2020> <14:08:04>  END
 <Dec10-2020> <14:08:04>  ADF 2017  RunTime: Dec10-2020 14:08:04  Nodes: 1  Procs: 1
 <Dec10-2020> <14:08:04>  Sulphur (TZ2P, 1s frozen)
 <Dec10-2020> <14:08:04>  RunType   : CREATE
 <Dec10-2020> <14:08:04>  Net Charge: 0 (Nuclei minus Electrons)
 <Dec10-2020> <14:08:04>  Symmetry  : ATOM
  Coordinates
    Atom         X           Y           Z   (Angstrom)
    1.S         0.000000    0.000000    0.000000
 <Dec10-2020> <14:08:04>  >>>> CORORT
 <Dec10-2020> <14:08:04>  >>>> FITINT
 <Dec10-2020> <14:08:04>  >>>> CLSMAT
 <Dec10-2020> <14:08:04>  >>>> ORTHON
 <Dec10-2020> <14:08:04>  >>>> GENPT
 <Dec10-2020> <14:08:04>  Block Length=  81
 <Dec10-2020> <14:08:04>  >>>> PTBAS
 <Dec10-2020> <14:08:04>  >>>> CYCLE
 <Dec10-2020> <14:08:04>              |Error|         MaxErr       Wt(A-DIIS)
 <Dec10-2020> <14:08:04>      1      0.00000000      0.00000000
 <Dec10-2020> <14:08:04>      2     22.42759179      6.68355878    100.0
 <Dec10-2020> <14:08:04>      3      8.97912759      3.07281693    100.0
 <Dec10-2020> <14:08:04>      4      4.98707427      1.96963381    100.0
 <Dec10-2020> <14:08:04>      5      1.25301661      0.51996078    100.0
 <Dec10-2020> <14:08:04>      6      0.94192877      0.37676315    100.0
 <Dec10-2020> <14:08:04>      7      0.11372786      0.04811533     47.6
 <Dec10-2020> <14:08:04>      8      0.04165931      0.01754762     16.7
 <Dec10-2020> <14:08:05>      9      0.00527365      0.00227358      1.3
 <Dec10-2020> <14:08:05>     10      0.00005604      0.00002491      0.0
 <Dec10-2020> <14:08:05>     11      0.00000034      0.00000017      0.0
 <Dec10-2020> <14:08:05>     12      0.00000001      0.00000000      0.0
 <Dec10-2020> <14:08:05>  SCF converged
 <Dec10-2020> <14:08:05>     13      0.00000000      0.00000000      0.0
 <Dec10-2020> <14:08:05>  >>>> POPAN
 <Dec10-2020> <14:08:05>  >>>> DEBYE
 <Dec10-2020> <14:08:05>  NORMAL TERMINATION
 <Dec10-2020> <14:08:05>  END
 <Dec10-2020> <14:08:05>  DIRAC 2017  RunTime: Dec10-2020 14:08:05  Nodes: 1  Procs: 1
 <Dec10-2020> <14:08:05>  NORMAL TERMINATION
 <Dec10-2020> <14:08:05>  END
 <Dec10-2020> <14:08:05>  ADF 2017  RunTime: Dec10-2020 14:08:05  Nodes: 1  Procs: 1
 <Dec10-2020> <14:08:05>  Carbon (TZ2P, 1s frozen)
 <Dec10-2020> <14:08:05>  RunType   : CREATE
 <Dec10-2020> <14:08:05>  Net Charge: 0 (Nuclei minus Electrons)
 <Dec10-2020> <14:08:05>  Symmetry  : ATOM
  Coordinates
    Atom         X           Y           Z   (Angstrom)
    1.C         0.000000    0.000000    0.000000
 <Dec10-2020> <14:08:05>  >>>> CORORT
 <Dec10-2020> <14:08:05>  >>>> FITINT
 <Dec10-2020> <14:08:05>  >>>> CLSMAT
 <Dec10-2020> <14:08:05>  >>>> ORTHON
 <Dec10-2020> <14:08:05>  >>>> GENPT
 <Dec10-2020> <14:08:05>  Block Length=  72
 <Dec10-2020> <14:08:05>  >>>> PTBAS
 <Dec10-2020> <14:08:05>  >>>> CYCLE
 <Dec10-2020> <14:08:05>              |Error|         MaxErr       Wt(A-DIIS)
 <Dec10-2020> <14:08:05>      1      0.00000000      0.00000000
 <Dec10-2020> <14:08:05>      2      1.58839989      1.24395935
 <Dec10-2020> <14:08:05>      3      0.83516493      0.69695972    100.0
 <Dec10-2020> <14:08:05>      4      0.21193083      0.16988856    100.0
 <Dec10-2020> <14:08:05>      5      0.18480862      0.14967312    100.0
 <Dec10-2020> <14:08:05>      6      0.01647283      0.01323061     12.4
 <Dec10-2020> <14:08:05>      7      0.00190532      0.00154949      0.6
 <Dec10-2020> <14:08:05>      8      0.00001410      0.00001137      0.0
 <Dec10-2020> <14:08:05>      9      0.00000037      0.00000031      0.0
 <Dec10-2020> <14:08:05>     10      0.00000000      0.00000000      0.0
 <Dec10-2020> <14:08:05>  SCF converged
 <Dec10-2020> <14:08:05>     11      0.00000000      0.00000000      0.0
 <Dec10-2020> <14:08:05>  >>>> POPAN
 <Dec10-2020> <14:08:05>  >>>> DEBYE
 <Dec10-2020> <14:08:05>  NORMAL TERMINATION
 <Dec10-2020> <14:08:05>  END
NORMAL TERMINATION

 *******************************************************************************
 *                                                                             *
 *  -------------------------------------                                      *
 *   Amsterdam Density Functional  (ADF)         2017                          *
 *  -------------------------------------                                      *
 *                                               r58813 2017-04-12             *
 *                                                                             *
 *                                                                             *
 *                            =====================                            *
 *                            |                   |                            *
 *                            |     D I R A C     |                            *
 *                            |                   |                            *
 *                            =====================                            *
 *                                                                             *
 *                                                                             *
 *   Online information and documentation:  https://www.scm.com/support/       *
 *   E-mail:  support@scm.com   info@scm.com                                   *
 *                                                                             *
 *   Scientific publications using ADF results must be properly referenced     *
 *   See the User Manuals (or the web site) for recommended citations          *
 *   The terms and conditions of the End User License Agreement apply to       *
 *   the use of ADF, https://www.scm.com/license-terms/                        *
 *                                                                             *
 **********************  x86_64_linux_intel / intelmpi  ************************
 
 Licensed to: SURF-SARA, Comp. & Networking Services / Amsterdam / NL
 SCM User ID: u7409
  
 DIRAC 2017  RunTime: Dec10-2020 14:08:05  Nodes: 1  Procs: 1

 Temporary files are created in /scratch/kid_0.T6zpSP

1
 OXYGEN ATOM 1s CORE RELATIVISTIC, Point Nuc, A and c from li
 N J RN H ZN XION ANUC CLIGHT
 5000    4100.00000000197.36710137  8.00000000  0.00000000   15.994914  0.1370360E+03
  PH   PHI     EPS        DEL        DELRVR
  0.30  0.30     2500.00  0.00001000  0.00001000
 IDIRC  NC1  NDEBU NPRIN  IPUN IRCOR IWCOR
   1   300     0     0     0     0     1
   XALPHA      XLATTER      RNUC
  0.70000000  0.00000000  0.00000000 Point Charge
   XN   XL   XJ      XE          XZ      XDELL
  1.0  0.0  0.5      -5.000       2.000     0.00000
  2.0  0.0  0.5      -1.000       2.000     0.00000
  2.0  1.0  0.5      -1.000       2.000     0.00000
  2.0  1.0  1.5      -1.000       2.000     0.00000
 ICORP=  0  NPCL=  0  DEMP=0.00  PEPS=0.000000
 R(1)=  0.1000000E-08 D=  0.1005080E+01 RNUC=  0.0000000E+00
 converged at cycle   28  DENSITY AVERAGING    0.2400
  MAXIMUM ERROR IN R.V(R) IS   0.81125670E-05
 Q,EY,EV,EZ,ESUM,ETOT,RHO  0.800000E+01 -0.101247E+02 -0.114961E+03 -0.177573E+03 -0.405053E+02 -0.743427E+02  0.414766E-14


 DIRAC CALCULATION
1                    OXYGEN ATOM 1s CORE RELATIVISTIC, Point Nuc, A and c from libtc


 EXCHANGE COEFFICIENT=  0.7000000           TAIL CORRECTION=  0.           NUCLEAR RADIUS=  0.000E+00
0                       ORBITAL    N    L    J     ELECTRONS     EIGENVALUE                DELTA OF EIGENV.

                          1S1/2  1.0  0.0  0.5     2.000       -0.1880014E+02                 0.7264359E-06
                          2S1/2  2.0  0.0  0.5     2.000       -0.8412236E+00                 0.5932752E-05
                          2P1/2  2.0  1.0  0.5     2.000       -0.3063203E+00                 0.5998471E-05
                          2P3/2  2.0  1.0  1.5     2.000       -0.3049609E+00                 0.5986971E-05


                                        NUCLEAR CHARGE=    8.000000
                            INTEGRAL OF CHARGE DENSITY=    8.000000
                           SUM OF THE ORBITAL ENERGIES=    -40.5053
                                          TOTAL ENERGY=    -74.3427
                                        KINETIC ENERGY=     74.4552
                             NUCLEAR ATTRACTION ENERGY=   -177.5730
                             ELECTRON REPULSION ENERGY=     36.3686
                                       EXCHANGE ENERGY=     -7.5935

 *******************************************************************************

                             D I R A C   E X I T
 NORMAL TERMINATION


 =================
 Timing Statistics
 =================
  
 Total Used :                     CPU=        0.08      System=        0.00     Elapsed=        0.13

 Calls  Section                     ( Mean, Percentage )
 ---------------------------------------------------------------------------------------------------
     2  ><      ................      0.00    0.01             0.00    0.13             0.00    0.01
     1  EXIT PROCEDURE .........      0.08   99.99             0.00   99.87             0.13   99.99


 Currently Open Files (EXIT00)
 ====================

 Unit    Access Format  Status   Type       Ident (file)
 -------------------------------------------------------
   3      SEQ    FORM   TRANSP  NORMAL      LOGFILE
                                          ( logfile )


 Buffered I/O statistics
 =======================
 Memory available:                     67108864
 Number of records fitting in memory:     16131
 Input : 100.0% of                            0  *4k bytes
 Output: 100.0% of                            0  *4k bytes
 Records from serial files evicted:           0
                    others evicted:           0
 Hash table lookups:          0 with          0 conflicts (100.00%)
NORMAL TERMINATION

Create O   file=TZ2P-O.1s
XC
  GGA PBE
End
relativistic ZORA
HartreeFock
Corepotentials t12.rel
End Input

 *******************************************************************************
 *                                                                             *
 *  -------------------------------------                                      *
 *   Amsterdam Density Functional  (ADF)         2017                          *
 *  -------------------------------------                                      *
 *                                               r58813 2017-04-12             *
 *                                                                             *
 *                                                                             *
 *                              =================                              *
 *                              |               |                              *
 *                              |     A D F     |                              *
 *                              |               |                              *
 *                              =================                              *
 *                                                                             *
 *                                                                             *
 *   Online information and documentation:  https://www.scm.com/support/       *
 *   E-mail:  support@scm.com   info@scm.com                                   *
 *                                                                             *
 *   Scientific publications using ADF results must be properly referenced     *
 *   See the User Manuals (or the web site) for recommended citations          *
 *   The terms and conditions of the End User License Agreement apply to       *
 *   the use of ADF, https://www.scm.com/license-terms/                        *
 *                                                                             *
 **********************  x86_64_linux_intel / intelmpi  ************************
 
 Licensed to: SURF-SARA, Comp. & Networking Services / Amsterdam / NL
 SCM User ID: u7409
  
 ADF 2017  RunTime: Dec10-2020 14:08:06  Nodes: 1  Procs: 1

 Temporary files are created in /scratch/kid_0.rGpOHV

 Oxygen (TZ2P, 1s frozen)


 ===========================
 A T T A C H E D   F I L E S
 ===========================
  
 CREATE - Data File:    TZ2P-O.1s
                        Oxygen (TZ2P, 1s frozen)
 Core Potentials:
         file : t12.rel


 ===============================
 M O D E L   P A R A M E T E R S
 ===============================
  
 DENSITY FUNCTIONAL POTENTIAL (scf)
    LDA:                               PW92                                    == Not Default ==
    Gradient Corrections:              PBEc PBEx                               == Not Default ==

 SPIN  (restricted / unrestr.)
    Molecule:                          Restricted                               

 OTHER ASPECTS
    Relativistic Corrections:          scalar (ZORA,MAPA)                      == Not Default ==

    Nuclear Charge Density Model:      Point Charge Nuclei                      
    Core Treatment:                    Frozen Orbital(s)                        

    Hyperfine or Zeeman Interaction:   ---                                      


 =====================================
 S Y M M E T R Y ,   E L E C T R O N S
 =====================================
  
 Symmetry: ATOM

 Irreducible Representations, including subspecies
 -------------------------------------------------
 S
 P:x  P:y  P:z
 D:z2  D:x2-y2  D:xy  D:xz  D:yz
 F:z3  F:z  F:xyz  F:z2x  F:z2y  F:x  F:y


 Configuration of Valence Electrons
 ==================================

          Occupation Numbers
          -------------------------------------------------
 S        2
 P        4
 D        0
 F        0
          -------------------------------------------------

 Total:   6

 Net Charge: 0 (Nuclei minus Electrons)

 Preset values for MO occupations will be applied through SCF cycle no. 1000000
 Thereafter, the program will assign electrons to MOs that are spatially
 similar to the occupied MOs in a "reference" cycle ("KeepOrbitals").
 The reference cycle is always the PREVIOUS cycle: it will evolve with
 the SCF procedure.


 ================================
 (Slater-type)  F U N C T I O N S  ***  (Basis and Fit)  ***
 ================================
  

 Atom Type    1  (O)
 ==============

 Valence Basis Sets:   9
 -----------------------
   1 S    7.360000
   2 S    1.720000
   2 S    2.880000
   2 S    7.580000
   2 P    1.120000
   2 P    2.080000
   2 P    4.080000
   3 D    2.000000
   4 F    3.000000

 Frozen Core Shells
 ------------------
    S:  1


 BAS: List of all Elementary Cartesian Basis Functions
 =====================================================

 The numbering in the list below (to the right of the function characteristics) is referred
 to in print-outs of MO eigenvectors and Mulliken populations in the BAS representation
 (as contrasted to the SFO representation).

 Notes:
 1. The functions are characterized by a polynomial prefactor (powers of x,y,z and r) and
    an exponential decay factor alpha.
 2. Since the basis sets are specific for an atom TYPE, the individual functions occur on
    all atoms of that type.
 3. The word 'Core' in the left margin signals that it is a Core Function (CF) : not a
    degree of freedom in the valence set, but only used to ensure orthogonalization of
    the other valence basis functions on the frozen Core Orbitals.


 (power of) X  Y  Z  R     Alpha  on Atom
            ==========     =====     ==========

 O                                    1
                                  ---------------------------------------------------------------------------
    Core    0  0  0  0     7.360      1
            0  0  0  1     1.720      2
            0  0  0  1     2.880      3
            0  0  0  1     7.580      4
            1  0  0  0     1.120      5
            0  1  0  0     1.120      6
            0  0  1  0     1.120      7
            1  0  0  0     2.080      8
            0  1  0  0     2.080      9
            0  0  1  0     2.080     10
            1  0  0  0     4.080     11
            0  1  0  0     4.080     12
            0  0  1  0     4.080     13
            2  0  0  0     2.000     14
            1  1  0  0     2.000     15
            1  0  1  0     2.000     16
            0  2  0  0     2.000     17
            0  1  1  0     2.000     18
            0  0  2  0     2.000     19
            3  0  0  0     3.000     20
            2  1  0  0     3.000     21
            2  0  1  0     3.000     22
            1  2  0  0     3.000     23
            1  1  1  0     3.000     24
            1  0  2  0     3.000     25
            0  3  0  0     3.000     26
            0  2  1  0     3.000     27
            0  1  2  0     3.000     28
            0  0  3  0     3.000     29

 Total number of charge fitting functions (nprimf)        82
 Total number of Cartesian basis functions (naos)         29
 Total number of Cartesian core functions  (ncos)          1


 BAS: List of all Elementary Cartesian Basis Functions
 =====================================================

 The numbering in the list below (to the right of the function characteristics) is referred
 to in print-outs of MO eigenvectors and Mulliken populations in the BAS representation
 (as contrasted to the SFO representation).

 Notes:
 1. The functions are characterized by a polynomial prefactor (powers of x,y,z and r) and
    an exponential decay factor alpha.
 2. Since the basis sets are specific for an atom TYPE, the individual functions occur on
    all atoms of that type.
 3. The word 'Core' in the left margin signals that it is a Core Function (CF) : not a
    degree of freedom in the valence set, but only used to ensure orthogonalization of
    the other valence basis functions on the frozen Core Orbitals.


 (power of) X  Y  Z  R     Alpha  on Atom
            ==========     =====     ==========

 O                                    1
                                  ---------------------------------------------------------------------------
    Core    0  0  0  0     7.360      1
            0  0  0  1     1.720      2
            0  0  0  1     2.880      3
            0  0  0  1     7.580      4
            1  0  0  0     1.120      5
            0  1  0  0     1.120      6
            0  0  1  0     1.120      7
            1  0  0  0     2.080      8
            0  1  0  0     2.080      9
            0  0  1  0     2.080     10
            1  0  0  0     4.080     11
            0  1  0  0     4.080     12
            0  0  1  0     4.080     13
            2  0  0  0     2.000     14
            1  1  0  0     2.000     15
            1  0  1  0     2.000     16
            0  2  0  0     2.000     17
            0  1  1  0     2.000     18
            0  0  2  0     2.000     19
            3  0  0  0     3.000     20
            2  1  0  0     3.000     21
            2  0  1  0     3.000     22
            1  2  0  0     3.000     23
            1  1  1  0     3.000     24
            1  0  2  0     3.000     25
            0  3  0  0     3.000     26
            0  2  1  0     3.000     27
            0  1  2  0     3.000     28
            0  0  3  0     3.000     29
1
 ***************************************************************************************************


                                              ***********************
                                              *  T E C H N I C A L  *
                                              ***********************
  


 =============================================================
 P A R A L L E L I Z A T I O N  and  V E C T O R I Z A T I O N
 =============================================================
  
 Nr of parallel processes:                                1
 Maximum vector length in NumInt loops:                 128

 IO buffersize (Mb):                                     64.000000


 =====================
 S C F   U P D A T E S
 =====================
  
 Max. nr. of cycles:                               300
 Convergence criterion:                              0.0000000100
   secondary criterion:                              0.0000000100

 Mix parameter (when DIIS does not apply):           0.2000000000
 Special mix parameter for the first cycle:          1.0000000000
 Mixed ADIIS+DIIS will be used
    Max number of expansion vectors:                10
    Pure ADIIS when Max([F,P]) is above              0.1000000000
    Pure DIIS when Max([F,P]) is below               0.0010000000
 Automatic ElectronSmearing (in case of problematic SCF convergence) disabled


 =================
 P R E C I S I O N  ***  (General: NumInt, NeglectFunctionTails, ...)  ***
 =================
  

 NumInt:           Target precision:                12.0000000000
 -------           Initial precision:               10.0000000000
                   Min. precision (optimization):   10.0000000000

 Neglect Functions:          Basis functions:        0.1000000000E-13
 ------------------          Fit functions:          0.1000000000E-13


 ===========================
 L I N E A R   S C A L I N G
 ===========================
  

 Cut-off radii density fit:                        0.1000000000E-97
 Overlap cut-off criterion AO matrix elements:     0.1000000000E-97
 Cut-offs for Coulomb potential and fitted density:0.1000000000E-97
 Cut-off criterion for Coulomb multipole terms:    0.1000000000E-97
 Progressive Convergence parameter:                 0.000000000    
1
 ***************************************************************************************************


                                            ***************************
                                            *  C O M P U T A T I O N  *
                                            ***************************
  

 Number of elements of the density matrix on this node (used, total):       435       435


 ===========================================
 Numerical Integration : Fuzzy Cells (Becke)
 ===========================================
  
 Becke grid quality: VERYGOOD       
  
 Lebedev angular grid order:             min:  13 max:  41
 Nr. of radial points:                   min:  68 max:  68

 Total nr. of points:         68
 Nr. of blocks:                1
 Block length:                68
 Nr. of dummy points:          0


 Test of Precision of the Numerical Integration Grid
 ===================================================

 Integral of the Total Core Density:                   1.99999999865610
 Relative Error:                                      -6.720E-10


 ========================
 Density Fitting (zlmFit)
 ========================
  
 ZlmFit Fit Quality: VERYGOOD       
  
 Max L-expansion:                        min:   0 max:   0
 Nr. of radial interpolation points:     min: 160 max: 160


 =====
 S C F  ***  ScaSCF  ***
 =====
  

 CYCLE    1
 SCF Error: norm([F,P])=      0.000000000000, max([F,P])=      0.000000000000
 orbitals (Q,E):
 ---------------
 S :1...3            ( 2.00    -5.3654)  ( 0.00    -2.2073)  ( 0.00    23.6692)
 P :1...3            ( 4.00    -5.0045)  ( 0.00    -2.0150)  ( 0.00    -0.3846)
 D :1...1            ( 0.00    -2.0410)
 F :1...1            ( 0.00    -0.0529)

 CYCLE    2
 SCF Error: norm([F,P])=      4.562808071410, max([F,P])=      2.528883433981
 orbitals (Q,E):
 ---------------
 S :1...2            ( 2.00    -0.1547)  ( 0.00     1.6948)
 P :1...2            ( 4.00     0.1772)  ( 0.00     0.9552)
 D :1...1            ( 0.00     1.4650)
 F :1...1            ( 0.00     3.8403)

 CYCLE    3
  SDIIS (wt  0.000):  0.3378  0.6622
 A-DIIS (wt  1.000):  0.4815  0.5185
  DIIS coefficients:  0.4815  0.5185
 SCF Error: norm([F,P])=      2.723178007181, max([F,P])=      1.798781577477
 orbitals (Q,E):
 ---------------
 S :1...2            ( 2.00    -1.1092)  ( 0.00     0.7550)
 P :1...2            ( 4.00    -0.5517)  ( 0.00     0.2589)
 D :1...1            ( 0.00     0.8910)
 F :1...1            ( 0.00     3.1465)

 CYCLE    4
  SDIIS (wt  0.000):  0.0918  0.9082
 A-DIIS (wt  1.000):  0.0000  1.0000
  DIIS coefficients:  0.0000  1.0000
 SCF Error: norm([F,P])=      0.288798754269, max([F,P])=      0.130531379071
 orbitals (Q,E):
 ---------------
 S :1...2            ( 2.00    -0.7707)  ( 0.00     0.9912)
 P :1...2            ( 4.00    -0.2285)  ( 0.00     0.4047)
 D :1...1            ( 0.00     1.1288)
 F :1...1            ( 0.00     3.4263)

 CYCLE    5
  SDIIS (wt  0.000):  0.0259  0.6739  0.3002
 A-DIIS (wt  1.000):  0.0000  0.5762  0.4238
  DIIS coefficients:  0.0000  0.5762  0.4238
 SCF Error: norm([F,P])=      0.416079409659, max([F,P])=      0.232361399966
 orbitals (Q,E):
 ---------------
 S :1...2            ( 2.00    -0.8764)  ( 0.00     0.9107)
 P :1...2            ( 4.00    -0.3279)  ( 0.00     0.3558)
 D :1...1            ( 0.00     1.0703)
 F :1...1            ( 0.00     3.3558)

 CYCLE    6
  SDIIS (wt  0.943):  0.0005  0.0237 -0.0200  0.9958
 A-DIIS (wt  0.057):  0.0000  0.0000  0.0000  1.0000
  DIIS coefficients:  0.0005  0.0224 -0.0189  0.9960
 SCF Error: norm([F,P])=      0.013627981721, max([F,P])=      0.006665205403
 orbitals (Q,E):
 ---------------
 S :1...2            ( 2.00    -0.8830)  ( 0.00     0.9059)
 P :1...2            ( 4.00    -0.3343)  ( 0.00     0.3522)
 D :1...1            ( 0.00     1.0658)
 F :1...1            ( 0.00     3.3506)

 CYCLE    7
  SDIIS (wt  1.000): -0.0000  0.0016  0.0022  0.0423  0.9538
  DIIS coefficients: -0.0000  0.0016  0.0022  0.0423  0.9538
 SCF Error: norm([F,P])=      0.001087898542, max([F,P])=      0.000624942777
 orbitals (Q,E):
 ---------------
 S :1...2            ( 2.00    -0.8827)  ( 0.00     0.9061)
 P :1...2            ( 4.00    -0.3340)  ( 0.00     0.3524)
 D :1...1            ( 0.00     1.0659)
 F :1...1            ( 0.00     3.3508)

 CYCLE    8
  SDIIS (wt  1.000): -0.0000 -0.0001  0.0000 -0.0032  0.0268  0.9764
  DIIS coefficients: -0.0000 -0.0001  0.0000 -0.0032  0.0268  0.9764
 SCF Error: norm([F,P])=      0.000035165957, max([F,P])=      0.000019840684
 orbitals (Q,E):
 ---------------
 S :1...2            ( 2.00    -0.8827)  ( 0.00     0.9061)
 P :1...2            ( 4.00    -0.3340)  ( 0.00     0.3524)
 D :1...1            ( 0.00     1.0659)
 F :1...1            ( 0.00     3.3508)

 CYCLE    9
  SDIIS (wt  1.000): -0.0000  0.0008  0.0189  0.9803
  DIIS coefficients: -0.0000  0.0008  0.0189  0.9803
 SCF Error: norm([F,P])=      0.000000326442, max([F,P])=      0.000000184027
 orbitals (Q,E):
 ---------------
 S :1...2            ( 2.00    -0.8827)  ( 0.00     0.9061)
 P :1...2            ( 4.00    -0.3340)  ( 0.00     0.3524)
 D :1...1            ( 0.00     1.0659)
 F :1...1            ( 0.00     3.3508)

 CYCLE   10
  SDIIS (wt  1.000):  0.0000  0.0004  0.9996
  DIIS coefficients:  0.0000  0.0004  0.9996
 SCF Error: norm([F,P])=      0.000000000571, max([F,P])=      0.000000000313
 orbitals (Q,E):
 ---------------
 S :1...2            ( 2.00    -0.8827)  ( 0.00     0.9061)
 P :1...2            ( 4.00    -0.3340)  ( 0.00     0.3524)
 D :1...1            ( 0.00     1.0659)
 F :1...1            ( 0.00     3.3508)

 SCF CONVERGED

 CYCLE   11
1
 ***************************************************************************************************


                                                *******************
                                                *  R E S U L T S  *
                                                *******************
  
  
 Hartree-Fock exchange energy:   -2.57561980706707     
 *** Setting up for NEW gradients in Focky
 *** Using FIT density in Focky

 Scaled ZORA Orbital Energies, per Irrep and Spin:
 =================================================
                        Occup              E (au)              E (eV)       Diff (eV) with prev. cycle
                        -----      --------------------        ------       --------------------------
 S
               1        2.000     -0.88268550294760E+00       -24.019              -9.47E-11
               2        0.000      0.90607230378391E+00        24.655
               3        0.000      0.29578809504483E+02       804.880
 P
               1        4.000     -0.33397083422303E+00        -9.088              -9.13E-11
               2        0.000      0.35235595488271E+00         9.588
               3        0.000      0.38342840546130E+01       104.336
 D
               1        0.000      0.10659203266423E+01        29.005
 F
               1        0.000      0.33507642281247E+01        91.179


 Partially Occupied:
               1 P                -0.33397083422303E+00
  
 HOMO :        1 S                -0.88268550294760E+00
 LUMO :        2 P                 0.35235595488271E+00
  


 Orbital Energies, all Irreps
 ========================================

 Irrep        no.  (spin)   Occup              E (au)                E (eV)
 ---------------------------------------------------------------------------
 S             1             2.00       -0.88268550294760E+00       -24.0191
 P             1             4.00       -0.33397083422303E+00        -9.0878
 P             2             0.00        0.35235595488271E+00         9.5881
 S             2             0.00        0.90607230378391E+00        24.6555
 D             1             0.00        0.10659203266423E+01        29.0052
 F             1             0.00        0.33507642281247E+01        91.1789
 P             3             0.00        0.38342840546130E+01       104.3362
 S             3             0.00        0.29578809504483E+02       804.8804


 Scaled ZORA Orbital Energies of the Core Orbitals:
 ==================================================

 (Note that the atoms are grouped by atomtype, see the labels, and may hence NOT be in input order)

 AtomType  Orbital  Atom                   E (au)                        E (eV)
 --------  -------  ----           --------------------        ----------------
 O           1S        1          -0.18925931516241E+02                -515.001


 =======================================
 M U L L I K E N   P O P U L A T I O N S
 =======================================
  
 The survey below gives for each atom:
 a) the total charge (Z minus electrons)
 b) the net spin polarization (nr of electrons spin-A minus spin-B)
 c) for each spin the atomic electron valence density (integrated) per L-value.

 Atom              Charge    Spin density          S         P         D         F
 ----              ------    ------------       ------    ------    ------    ------
 1 O               0.0000                       2.0000    4.0000    0.0000    0.0000

 Populations of individual BAS functions
 ----------------------------------------
 1 O            0.0005  0.9226  1.0965 -0.0196  0.3345  0.3345  0.3345  0.7512  0.7512  0.7512
                0.2476  0.2476  0.2476  0.0000  0.0000  0.0000  0.0000  0.0000  0.0000  0.0000
                0.0000  0.0000  0.0000  0.0000  0.0000  0.0000  0.0000  0.0000  0.0000

 Gross Charges per Atom (Z minus electrons)
 ==========================================
             0.0000
 Net Total:  0.00000000


 =======================================================================
 Electrostatic potential at the Nuclei due to electrons and other nuclei
 =======================================================================
  
         Atom                  Potential
         ----                  ---------
     1)   O                  22.20265734
 
 
 ========================
 No memory problems found
 ========================
 
 Maximum number of active allocate calls:         493
 
 *******************************************************************************

                             A D F   E X I T
 NORMAL TERMINATION


 =================
 Timing Statistics
 =================
  
 Total Used :                     CPU=        0.28      System=        0.03     Elapsed=        0.36

 Calls  Section                     ( Mean, Percentage )
 ---------------------------------------------------------------------------------------------------
     3  ><      ................      0.00    0.16             0.00    0.74             0.00    0.75
     1  INIT    ................      0.00    1.39             0.01   39.19             0.02    6.93
     1  GEOMET  ................      0.00    0.96             0.00   12.30             0.01    3.15
     1  INPUTA  ................      0.00    0.40             0.00    1.93             0.00    0.62
     1  MAINSY  ................      0.00    1.59             0.00    7.63             0.01    3.17
     1  SYMFIT  ................      0.00    0.29             0.00    0.03             0.00    0.22
     1  CORORT  ................      0.00    0.25             0.00    0.00             0.00    0.54
     1  SYMORB  ................      0.00    0.27             0.00    0.00             0.00    0.21
     1  FITINT  ................      0.01    3.16             0.00    0.00             0.01    2.81
     1  CLSMAT  ................      0.00    0.14             0.00    0.00             0.00    0.40
     1  ORTHON  ................      0.00    0.46             0.00    0.00             0.00    0.59
     1  GENPT   ................      0.01    3.06             0.00    0.00             0.01    3.05
     1  PTBAS   ................      0.00    1.16             0.00    0.00             0.00    1.22
    11  FOCKY   ................      0.02   68.98             0.00   34.98             0.02   56.73
    11  FOCKTR  ................      0.00    2.28             0.00    0.63             0.00    1.81
    11  SDIIS   ................      0.00    4.28             0.00    2.58             0.00    7.88
     1  COREPS  ................      0.01    4.88             0.00    0.00             0.01    3.77
     1  POPAN   ................      0.00    1.34             0.00    0.00             0.01    1.42
     1  DEBYE   ................      0.00    0.17             0.00    0.00             0.00    0.41
     1  EXIT PROCEDURE .........      0.01    4.78             0.00    0.00             0.02    4.31


 Currently Open Files (EXIT00)
 ====================

 Unit    Access Format  Status   Type       Ident (file)
 -------------------------------------------------------
   3      SEQ    FORM   TRANSP  NORMAL      LOGFILE
                                          ( logfile )


 Buffered I/O statistics
 =======================
 Memory available:                     67108864
 Number of records fitting in memory:     16131
 Input :   0.1% of                        30344  *4k bytes
 Output:  15.8% of                         1477  *4k bytes
 Records from serial files evicted:           0
                    others evicted:           0
 Hash table lookups:      78539 with          0 conflicts (  0.00%)

 ***************************************************************************************************
 (LOGFILE)
 <Dec10-2020> <14:08:02>  DIRAC 2017  RunTime: Dec10-2020 14:08:02  Nodes: 1  Procs: 1
 <Dec10-2020> <14:08:02>  NORMAL TERMINATION
 <Dec10-2020> <14:08:02>  END
 <Dec10-2020> <14:08:02>  ADF 2017  RunTime: Dec10-2020 14:08:02  Nodes: 1  Procs: 1
 <Dec10-2020> <14:08:02>  Hydrogen (TZ2P)
 <Dec10-2020> <14:08:02>  RunType   : CREATE
 <Dec10-2020> <14:08:02>  Net Charge: 0 (Nuclei minus Electrons)
 <Dec10-2020> <14:08:02>  Symmetry  : ATOM
  Coordinates
    Atom         X           Y           Z   (Angstrom)
    1.H         0.000000    0.000000    0.000000
 <Dec10-2020> <14:08:02>  >>>> CORORT
 <Dec10-2020> <14:08:02>  >>>> FITINT
 <Dec10-2020> <14:08:02>  >>>> CLSMAT
 <Dec10-2020> <14:08:02>  >>>> ORTHON
 <Dec10-2020> <14:08:02>  >>>> GENPT
 <Dec10-2020> <14:08:02>  Block Length=  64
 <Dec10-2020> <14:08:02>  >>>> PTBAS
 <Dec10-2020> <14:08:02>  >>>> CYCLE
 <Dec10-2020> <14:08:02>              |Error|         MaxErr       Wt(A-DIIS)
 <Dec10-2020> <14:08:02>      1      0.00000000      0.00000000
 <Dec10-2020> <14:08:02>      2      0.03155047      0.03012130
 <Dec10-2020> <14:08:02>      3      0.00862036      0.00834572    100.0
 <Dec10-2020> <14:08:03>      4      0.00173320      0.00171953      0.7
 <Dec10-2020> <14:08:03>      5      0.00004372      0.00003982      0.0
 <Dec10-2020> <14:08:03>      6      0.00000239      0.00000216      0.0
 <Dec10-2020> <14:08:03>      7      0.00000001      0.00000001      0.0
 <Dec10-2020> <14:08:03>  SCF converged
 <Dec10-2020> <14:08:03>      8      0.00000000      0.00000000      0.0
 <Dec10-2020> <14:08:03>  >>>> POPAN
 <Dec10-2020> <14:08:03>  >>>> DEBYE
 <Dec10-2020> <14:08:03>  NORMAL TERMINATION
 <Dec10-2020> <14:08:03>  END
 <Dec10-2020> <14:08:03>  DIRAC 2017  RunTime: Dec10-2020 14:08:03  Nodes: 1  Procs: 1
 <Dec10-2020> <14:08:03>  NORMAL TERMINATION
 <Dec10-2020> <14:08:03>  END
 <Dec10-2020> <14:08:03>  ADF 2017  RunTime: Dec10-2020 14:08:03  Nodes: 1  Procs: 1
 <Dec10-2020> <14:08:03>  Nitrogen (TZ2P, 1s frozen)
 <Dec10-2020> <14:08:03>  RunType   : CREATE
 <Dec10-2020> <14:08:03>  Net Charge: 0 (Nuclei minus Electrons)
 <Dec10-2020> <14:08:03>  Symmetry  : ATOM
  Coordinates
    Atom         X           Y           Z   (Angstrom)
    1.N         0.000000    0.000000    0.000000
 <Dec10-2020> <14:08:03>  >>>> CORORT
 <Dec10-2020> <14:08:03>  >>>> FITINT
 <Dec10-2020> <14:08:03>  >>>> CLSMAT
 <Dec10-2020> <14:08:03>  >>>> ORTHON
 <Dec10-2020> <14:08:03>  >>>> GENPT
 <Dec10-2020> <14:08:03>  Block Length=  68
 <Dec10-2020> <14:08:03>  >>>> PTBAS
 <Dec10-2020> <14:08:03>  >>>> CYCLE
 <Dec10-2020> <14:08:04>              |Error|         MaxErr       Wt(A-DIIS)
 <Dec10-2020> <14:08:04>      1      0.00000000      0.00000000
 <Dec10-2020> <14:08:04>      2      2.83319777      1.83798856
 <Dec10-2020> <14:08:04>      3      1.57643681      1.19049627    100.0
 <Dec10-2020> <14:08:04>      4      0.27464764      0.17793606    100.0
 <Dec10-2020> <14:08:04>      5      0.31772215      0.21876709    100.0
 <Dec10-2020> <14:08:04>      6      0.00328555      0.00230030      1.3
 <Dec10-2020> <14:08:04>      7      0.00006766      0.00003768      0.0
 <Dec10-2020> <14:08:04>      8      0.00000960      0.00000665      0.0
 <Dec10-2020> <14:08:04>      9      0.00000004      0.00000003      0.0
 <Dec10-2020> <14:08:04>     10      0.00000000      0.00000000      0.0
 <Dec10-2020> <14:08:04>  SCF converged
 <Dec10-2020> <14:08:04>     11      0.00000000      0.00000000      0.0
 <Dec10-2020> <14:08:04>  >>>> POPAN
 <Dec10-2020> <14:08:04>  >>>> DEBYE
 <Dec10-2020> <14:08:04>  NORMAL TERMINATION
 <Dec10-2020> <14:08:04>  END
 <Dec10-2020> <14:08:04>  DIRAC 2017  RunTime: Dec10-2020 14:08:04  Nodes: 1  Procs: 1
 <Dec10-2020> <14:08:04>  NORMAL TERMINATION
 <Dec10-2020> <14:08:04>  END
 <Dec10-2020> <14:08:04>  ADF 2017  RunTime: Dec10-2020 14:08:04  Nodes: 1  Procs: 1
 <Dec10-2020> <14:08:04>  Sulphur (TZ2P, 1s frozen)
 <Dec10-2020> <14:08:04>  RunType   : CREATE
 <Dec10-2020> <14:08:04>  Net Charge: 0 (Nuclei minus Electrons)
 <Dec10-2020> <14:08:04>  Symmetry  : ATOM
  Coordinates
    Atom         X           Y           Z   (Angstrom)
    1.S         0.000000    0.000000    0.000000
 <Dec10-2020> <14:08:04>  >>>> CORORT
 <Dec10-2020> <14:08:04>  >>>> FITINT
 <Dec10-2020> <14:08:04>  >>>> CLSMAT
 <Dec10-2020> <14:08:04>  >>>> ORTHON
 <Dec10-2020> <14:08:04>  >>>> GENPT
 <Dec10-2020> <14:08:04>  Block Length=  81
 <Dec10-2020> <14:08:04>  >>>> PTBAS
 <Dec10-2020> <14:08:04>  >>>> CYCLE
 <Dec10-2020> <14:08:04>              |Error|         MaxErr       Wt(A-DIIS)
 <Dec10-2020> <14:08:04>      1      0.00000000      0.00000000
 <Dec10-2020> <14:08:04>      2     22.42759179      6.68355878    100.0
 <Dec10-2020> <14:08:04>      3      8.97912759      3.07281693    100.0
 <Dec10-2020> <14:08:04>      4      4.98707427      1.96963381    100.0
 <Dec10-2020> <14:08:04>      5      1.25301661      0.51996078    100.0
 <Dec10-2020> <14:08:04>      6      0.94192877      0.37676315    100.0
 <Dec10-2020> <14:08:04>      7      0.11372786      0.04811533     47.6
 <Dec10-2020> <14:08:04>      8      0.04165931      0.01754762     16.7
 <Dec10-2020> <14:08:05>      9      0.00527365      0.00227358      1.3
 <Dec10-2020> <14:08:05>     10      0.00005604      0.00002491      0.0
 <Dec10-2020> <14:08:05>     11      0.00000034      0.00000017      0.0
 <Dec10-2020> <14:08:05>     12      0.00000001      0.00000000      0.0
 <Dec10-2020> <14:08:05>  SCF converged
 <Dec10-2020> <14:08:05>     13      0.00000000      0.00000000      0.0
 <Dec10-2020> <14:08:05>  >>>> POPAN
 <Dec10-2020> <14:08:05>  >>>> DEBYE
 <Dec10-2020> <14:08:05>  NORMAL TERMINATION
 <Dec10-2020> <14:08:05>  END
 <Dec10-2020> <14:08:05>  DIRAC 2017  RunTime: Dec10-2020 14:08:05  Nodes: 1  Procs: 1
 <Dec10-2020> <14:08:05>  NORMAL TERMINATION
 <Dec10-2020> <14:08:05>  END
 <Dec10-2020> <14:08:05>  ADF 2017  RunTime: Dec10-2020 14:08:05  Nodes: 1  Procs: 1
 <Dec10-2020> <14:08:05>  Carbon (TZ2P, 1s frozen)
 <Dec10-2020> <14:08:05>  RunType   : CREATE
 <Dec10-2020> <14:08:05>  Net Charge: 0 (Nuclei minus Electrons)
 <Dec10-2020> <14:08:05>  Symmetry  : ATOM
  Coordinates
    Atom         X           Y           Z   (Angstrom)
    1.C         0.000000    0.000000    0.000000
 <Dec10-2020> <14:08:05>  >>>> CORORT
 <Dec10-2020> <14:08:05>  >>>> FITINT
 <Dec10-2020> <14:08:05>  >>>> CLSMAT
 <Dec10-2020> <14:08:05>  >>>> ORTHON
 <Dec10-2020> <14:08:05>  >>>> GENPT
 <Dec10-2020> <14:08:05>  Block Length=  72
 <Dec10-2020> <14:08:05>  >>>> PTBAS
 <Dec10-2020> <14:08:05>  >>>> CYCLE
 <Dec10-2020> <14:08:05>              |Error|         MaxErr       Wt(A-DIIS)
 <Dec10-2020> <14:08:05>      1      0.00000000      0.00000000
 <Dec10-2020> <14:08:05>      2      1.58839989      1.24395935
 <Dec10-2020> <14:08:05>      3      0.83516493      0.69695972    100.0
 <Dec10-2020> <14:08:05>      4      0.21193083      0.16988856    100.0
 <Dec10-2020> <14:08:05>      5      0.18480862      0.14967312    100.0
 <Dec10-2020> <14:08:05>      6      0.01647283      0.01323061     12.4
 <Dec10-2020> <14:08:05>      7      0.00190532      0.00154949      0.6
 <Dec10-2020> <14:08:05>      8      0.00001410      0.00001137      0.0
 <Dec10-2020> <14:08:05>      9      0.00000037      0.00000031      0.0
 <Dec10-2020> <14:08:05>     10      0.00000000      0.00000000      0.0
 <Dec10-2020> <14:08:05>  SCF converged
 <Dec10-2020> <14:08:05>     11      0.00000000      0.00000000      0.0
 <Dec10-2020> <14:08:05>  >>>> POPAN
 <Dec10-2020> <14:08:05>  >>>> DEBYE
 <Dec10-2020> <14:08:05>  NORMAL TERMINATION
 <Dec10-2020> <14:08:05>  END
 <Dec10-2020> <14:08:05>  DIRAC 2017  RunTime: Dec10-2020 14:08:05  Nodes: 1  Procs: 1
 <Dec10-2020> <14:08:05>  NORMAL TERMINATION
 <Dec10-2020> <14:08:05>  END
 <Dec10-2020> <14:08:06>  ADF 2017  RunTime: Dec10-2020 14:08:06  Nodes: 1  Procs: 1
 <Dec10-2020> <14:08:06>  Oxygen (TZ2P, 1s frozen)
 <Dec10-2020> <14:08:06>  RunType   : CREATE
 <Dec10-2020> <14:08:06>  Net Charge: 0 (Nuclei minus Electrons)
 <Dec10-2020> <14:08:06>  Symmetry  : ATOM
  Coordinates
    Atom         X           Y           Z   (Angstrom)
    1.O         0.000000    0.000000    0.000000
 <Dec10-2020> <14:08:06>  >>>> CORORT
 <Dec10-2020> <14:08:06>  >>>> FITINT
 <Dec10-2020> <14:08:06>  >>>> CLSMAT
 <Dec10-2020> <14:08:06>  >>>> ORTHON
 <Dec10-2020> <14:08:06>  >>>> GENPT
 <Dec10-2020> <14:08:06>  Block Length=  68
 <Dec10-2020> <14:08:06>  >>>> PTBAS
 <Dec10-2020> <14:08:06>  >>>> CYCLE
 <Dec10-2020> <14:08:06>              |Error|         MaxErr       Wt(A-DIIS)
 <Dec10-2020> <14:08:06>      1      0.00000000      0.00000000
 <Dec10-2020> <14:08:06>      2      4.56280807      2.52888343
 <Dec10-2020> <14:08:06>      3      2.72317801      1.79878158    100.0
 <Dec10-2020> <14:08:06>      4      0.28879875      0.13053138    100.0
 <Dec10-2020> <14:08:06>      5      0.41607941      0.23236140    100.0
 <Dec10-2020> <14:08:06>      6      0.01362798      0.00666521      5.7
 <Dec10-2020> <14:08:06>      7      0.00108790      0.00062494      0.0
 <Dec10-2020> <14:08:06>      8      0.00003517      0.00001984      0.0
 <Dec10-2020> <14:08:06>      9      0.00000033      0.00000018      0.0
 <Dec10-2020> <14:08:06>     10      0.00000000      0.00000000      0.0
 <Dec10-2020> <14:08:06>  SCF converged
 <Dec10-2020> <14:08:06>     11      0.00000000      0.00000000      0.0
 <Dec10-2020> <14:08:06>  >>>> POPAN
 <Dec10-2020> <14:08:06>  >>>> DEBYE
 <Dec10-2020> <14:08:06>  NORMAL TERMINATION
 <Dec10-2020> <14:08:06>  END
NORMAL TERMINATION


 Parallel Execution: Process Information
 ==============================================================================
 Rank   Node Name                              NodeID   MyNodeRank  NodeMaster
    0   r13n19.lisa.surfsara.nl                   0          0          0
    1   r13n19.lisa.surfsara.nl                   0          1         -1
    2   r13n19.lisa.surfsara.nl                   0          2         -1
    3   r13n19.lisa.surfsara.nl                   0          3         -1
    4   r13n19.lisa.surfsara.nl                   0          4         -1
    5   r13n19.lisa.surfsara.nl                   0          5         -1
    6   r13n19.lisa.surfsara.nl                   0          6         -1
    7   r13n19.lisa.surfsara.nl                   0          7         -1
    8   r13n23.lisa.surfsara.nl                   1          0          1
    9   r13n23.lisa.surfsara.nl                   1          1         -1
   10   r13n23.lisa.surfsara.nl                   1          2         -1
   11   r13n23.lisa.surfsara.nl                   1          3         -1
   12   r13n23.lisa.surfsara.nl                   1          4         -1
   13   r13n23.lisa.surfsara.nl                   1          5         -1
   14   r13n23.lisa.surfsara.nl                   1          6         -1
   15   r13n23.lisa.surfsara.nl                   1          7         -1
 ==============================================================================


May use up to 45443MB of RAM as shared memory on node 0
May use up to 45443MB of RAM as shared memory on node 1


ATOMS
      1 H          -2.6561    0.1436   -0.8941
      2 H           1.4487   -2.4239   -0.3567
      3 N           1.1164   -1.4563   -0.2142
      4 N           1.5700    0.9346    0.1386
      5 O          -1.0125   -2.1232   -0.3136
      6 H           2.2278    1.7211    0.2549
      7 C          -0.2182   -1.2043   -0.1777
      8 C          -0.7148    0.1850    0.0269
      9 C           0.1711    1.1900    0.17516
     10 C           2.0495   -0.3917   -0.0568
     11 C          -2.1960    0.4569    0.0663
     12 H          -0.1751    2.2087    0.3256
     13 H          -2.6570   -0.1203    0.8950
     14 H          -2.4185    1.5340    0.2250
     15 S           3.4646   -0.6541   -0.0948
END

NUMERICALQUALITY Good

SYMMETRY NOSYM

Unrestricted

CHARGE {0 {2}}

noncollinear

HartreeFock

NoPrint LogFile

XC
  GGA PBE
END

RELATIVISTIC Scalar ZORA

GEOMETRY
    optim Delocalized
    iterations 10000
END

SCF
  converge 1.0e-8 1.0e-6
  diis ok=0.01
  iterations 10000
END

Fragments
H t21.H
N t21.N
S t21.S
C t21.C
O t21.O
End
end input

 *******************************************************************************
 *                                                                             *
 *  -------------------------------------                                      *
 *   Amsterdam Density Functional  (ADF)         2017                          *
 *  -------------------------------------                                      *
 *                                               r58813 2017-04-12             *
 *                                                                             *
 *                                                                             *
 *                              =================                              *
 *                              |               |                              *
 *                              |     A D F     |                              *
 *                              |               |                              *
 *                              =================                              *
 *                                                                             *
 *                                                                             *
 *   Online information and documentation:  https://www.scm.com/support/       *
 *   E-mail:  support@scm.com   info@scm.com                                   *
 *                                                                             *
 *   Scientific publications using ADF results must be properly referenced     *
 *   See the User Manuals (or the web site) for recommended citations          *
 *   The terms and conditions of the End User License Agreement apply to       *
 *   the use of ADF, https://www.scm.com/license-terms/                        *
 *                                                                             *
 **********************  x86_64_linux_intel / intelmpi  ************************
 
 Licensed to: SURF-SARA, Comp. & Networking Services / Amsterdam / NL
 SCM User ID: u7409
  
 ADF 2017  RunTime: Dec10-2020 14:08:08  Nodes: 2  Procs: 16

 Temporary files are created in /scratch/kid_0.pdtIhP


Communication costs MPI_COMM_WORLD:  22257.890 usec per message,  18.7539 usec per 8-byte item
Communication costs for intra-node:  20181.241 usec per message,  15.3726 usec per 8-byte item

 *** (NO TITLE) ***


 ===========================
 A T T A C H E D   F I L E S
 ===========================
  


 ===============================
 M O D E L   P A R A M E T E R S
 ===============================
  
 DENSITY FUNCTIONAL POTENTIAL (scf)
    LDA:                               PW92                                    == Not Default ==
    Gradient Corrections:              PBEc PBEx                               == Not Default ==

 SPIN  (restricted / unrestr.)
    Molecule:                          UNrestricted                            == Not Default ==
    Fragments:                         Restricted                               

 OTHER ASPECTS
    Relativistic Corrections:          scalar (ZORA,MAPA)                      == Not Default ==

    Nuclear Charge Density Model:      Point Charge Nuclei                      
    Core Treatment:                    Frozen Orbital(s)                        

    Hyperfine or Zeeman Interaction:   ---                                      


 Fragment File(s)
 ----------------
 H:
         file : t21.H
         jobid: ADF 2017  RunTime: Dec10-2020 14:08:02  Nodes: 1  Procs: 1
         title: Hydrogen (TZ2P)
 N:
         file : t21.N
         jobid: ADF 2017  RunTime: Dec10-2020 14:08:03  Nodes: 1  Procs: 1
         title: Nitrogen (TZ2P, 1s frozen)
 O:
         file : t21.O
         jobid: ADF 2017  RunTime: Dec10-2020 14:08:06  Nodes: 1  Procs: 1
         title: Oxygen (TZ2P, 1s frozen)
 C:
         file : t21.C
         jobid: ADF 2017  RunTime: Dec10-2020 14:08:05  Nodes: 1  Procs: 1
         title: Carbon (TZ2P, 1s frozen)
 S:
         file : t21.S
         jobid: ADF 2017  RunTime: Dec10-2020 14:08:04  Nodes: 1  Procs: 1
         title: Sulphur (TZ2P, 1s frozen)


                                   *********************************************
                                   *  R U N   T Y P E : GEOMETRY OPTIMIZATION  *
                                   *********************************************
  


 ===============
 G E O M E T R Y  ***  3D  Molecule  ***
 ===============
  

 ATOMS
 =====                            X Y Z                    CHARGE
                                (Angstrom)             Nucl     +Core       At.Mass
                       --------------------------    ----------------       -------
    1  H              -2.6561    0.1436   -0.8941      1.00      1.00        1.0078
    2  H               1.4487   -2.4239   -0.3567      1.00      1.00        1.0078
    3  N               1.1164   -1.4563   -0.2142      7.00      5.00       14.0031
    4  N               1.5700    0.9346    0.1386      7.00      5.00       14.0031
    5  O              -1.0125   -2.1232   -0.3136      8.00      6.00       15.9949
    6  H               2.2278    1.7211    0.2549      1.00      1.00        1.0078
    7  C              -0.2182   -1.2043   -0.1777      6.00      4.00       12.0000
    8  C              -0.7148    0.1850    0.0269      6.00      4.00       12.0000
    9  C               0.1711    1.1900    0.1752      6.00      4.00       12.0000
   10  C               2.0495   -0.3917   -0.0568      6.00      4.00       12.0000
   11  C              -2.1960    0.4569    0.0663      6.00      4.00       12.0000
   12  H              -0.1751    2.2087    0.3256      1.00      1.00        1.0078
   13  H              -2.6570   -0.1203    0.8950      1.00      1.00        1.0078
   14  H              -2.4185    1.5340    0.2250      1.00      1.00        1.0078
   15  S               3.4646   -0.6541   -0.0948     16.00     14.00       31.9721


 FRAGMENTS
 =========                                     Atoms in this Fragment     Cart. coord.s (Angstrom)
                                               -------------------------------------------------------
    1  H                                                 1  H           -2.6561    0.1436   -0.8941
    2  H                                                 2  H            1.4487   -2.4239   -0.3567
    3  H                                                 6  H            2.2278    1.7211    0.2549
    4  H                                                12  H           -0.1751    2.2087    0.3256
    5  H                                                13  H           -2.6570   -0.1203    0.8950
    6  H                                                14  H           -2.4185    1.5340    0.2250
    7  N                                                 3  N            1.1164   -1.4563   -0.2142
    8  N                                                 4  N            1.5700    0.9346    0.1386
    9  O                                                 5  O           -1.0125   -2.1232   -0.3136
   10  C                                                 7  C           -0.2182   -1.2043   -0.1777
   11  C                                                 8  C           -0.7148    0.1850    0.0269
   12  C                                                 9  C            0.1711    1.1900    0.1752
   13  C                                                10  C            2.0495   -0.3917   -0.0568
   14  C                                                11  C           -2.1960    0.4569    0.0663
   15  S                                                15  S            3.4646   -0.6541   -0.0948


 Interatomic Distance Matrix (Angstrom)
 --------------------------------------

   1)     0.000
   2)     4.871   0.000
   3)     4.154   1.033   0.000
   4)     4.422   3.397   2.459   0.000
   5)     2.860   2.480   2.233   4.028   0.000
   6)     5.259   4.262   3.399   1.032   5.060   0.000
   7)     2.876   2.073   1.359   2.806   1.222   3.838   0.000
   8)     2.149   3.411   2.471   2.407   2.352   3.327   1.490   0.000
   9)     3.199   3.870   2.837   1.422   3.552   2.126   2.451   1.348   0.000
  10)     4.809   2.140   1.424   1.424   3.527   2.143   2.412   2.825   2.467   0.000
  11)     1.110   4.665   3.835   3.797   2.864   4.605   2.594   1.506   2.480   4.331
          0.000
  12)     3.451   4.956   3.923   2.169   4.458   2.453   3.450   2.116   1.086   3.443
          2.687   0.000
  13)     1.808   4.871   4.154   4.422   2.859   5.259   2.876   2.149   3.199   4.809
          1.110   3.451   0.000
  14)     1.801   5.564   4.651   4.034   3.955   4.650   3.536   2.182   2.613   4.873
          1.111   2.345   1.801   0.000
  15)     6.224   2.695   2.484   2.484   4.717   2.701   3.725   4.265   3.784   1.440
          5.771   4.650   6.224   6.285   0.000

 Min. Distance =    1.0319
 Max. Distance =    6.2850


 =====================================
 S Y M M E T R Y ,   E L E C T R O N S
 =====================================
  
 Symmetry: NOSYM

 Irreducible Representations, including subspecies
 -------------------------------------------------
 A


 Configuration of Valence Electrons
 ==================================
 ( determined in the SCF procedure )

 Total:   29 (Spin-A)  + 27 (Spin-B)

 Net Charge: 0 (Nuclei minus Electrons)
 Spin polar: 2 (Spin_A minus Spin_B electrons)

 Aufbau principle for MO occupations will be applied through SCF cycle no.    5000
 Thereafter, the program will assign electrons to MOs that are spatially
 similar to the occupied MOs in a "reference" cycle ("KeepOrbitals").
 The reference cycle is always the PREVIOUS cycle: it will evolve with
 the SCF procedure.
1
 ***************************************************************************************************


                                      ****************************************
                                      *  B U I L D : (Fragments, Functions)  *
                                      ****************************************
  


 =======
 S F O s  ***  (Symmetrized Fragment Orbitals)  ***
 =======
  
 SFOs are linear combinations of (valence) Fragment Orbitals (FOs), such that the SFOs transform as the
 irreducible representations of the (molecular) symmetry group. Each SFO is therefore characterized by
 an irrep of the molecule and by a few (or only one) generating FOs.
 The SFOs constitute a symmetry-adapted basis for the Fock matrix. The MO eigenvector coefficients in
 this basis provide a direct interpretation of the MOs in terms of Frontier Orbital Theory.

 The SFOs are combined with auxiliary Core Functions (CFs) to ensure orthogonalization on the (frozen)
 Core Orbitals (COs). The Core-orthogonalized SFOs (CSFOs) constitute the true Fock basis.

 The FOs, and hence also the (C)SFOs are combinations of the elementary basis functions (BAS). The basis
 functions that participate in the description of the SFOs depend on the irrep. The indices of the
 involved functions are printed below for each irrep.
 (The complete list of primitive basis functions is printed in another section)

 Total nr. of (C)SFOs (summation over all irreps) :   290

 NOTE: a (C)SFO that is defined as a combination of more than one FO is usually NOT normalized.


                                       === A ===
 Nr. of SFOs :  290
 Cartesian basis functions that participate in this irrep (total number =   341) :
     73   102   131   160   189   218   247   276   305     1
      2     3     4     5     6     7     8     9    10    11
     12    13    14    15    16    17    18    19    20    21
     22    23    24    25    26    27    28    29    30    31
     32    33    34    35    36    37    38    39    40    41
     42    43    44    45    46    47    48    49    50    51
     52    53    54    55    56    57    58    59    60    61
     62    63    64    65    66    67    68    69    70    71
     72    74    75    76    77    80    83    78    81    84
     79    82    85    86    87    88    89    90    91    92
     93    94    95    96    97    98    99   100   101   103
    104   105   106   109   112   107   110   113   108   111
    114   115   116   117   118   119   120   121   122   123
    124   125   126   127   128   129   130   132   133   134
    135   138   141   136   139   142   137   140   143   144
    145   146   147   148   149   150   151   152   153   154
    155   156   157   158   159   161   162   163   164   167
    170   165   168   171   166   169   172   173   174   175
    176   177   178   179   180   181   182   183   184   185
    186   187   188   190   191   192   193   196   199   194
    197   200   195   198   201   202   203   204   205   206
    207   208   209   210   211   212   213   214   215   216
    217   219   220   221   222   225   228   223   226   229
    224   227   230   231   232   233   234   235   236   237
    238   239   240   241   242   243   244   245   246   248
    249   250   251   254   257   252   255   258   253   256
    259   260   261   262   263   264   265   266   267   268
    269   270   271   272   273   274   275   277   278   279
    280   283   286   281   284   287   282   285   288   289
    290   291   292   293   294   295   296   297   298   299
    300   301   302   303   304   306   307   314   315   316
    308   311   317   320   323   309   312   318   321   324
    310   313   319   322   325   326   327   328   329   330
    331   332   333   334   335   336   337   338   339   340
    341

    SFO  (index         Fragment          Generating    Expansion in Fragment Orbitals
  indx  incl.CFs)   Occup   Orb.Energy   FragmentType  Coeff.   Orbital     on Fragment
 --------------------------------------------------------------------------------------
     1      10      1.000      -0.239 au  H             1.00      1 S               1
                        (      -6.494 eV)
     2      11       --         0.091 au  H             1.00      2 S               1
                        (       2.470 eV)
     3      12       --         1.522 au  H             1.00      3 S               1
                        (      41.412 eV)
     4      13       --         0.405 au  H             1.00      1 P:x             1
                        (      11.031 eV)
     5      14       --         0.405 au  H             1.00      1 P:y             1
                        (      11.031 eV)
     6      15       --         0.405 au  H             1.00      1 P:z             1
                        (      11.031 eV)
     7      16       --         2.566 au  H             1.00      1 D:z2            1
                        (      69.819 eV)
     8      17       --         2.566 au  H             1.00      1 D:x2-y2         1
                        (      69.819 eV)
     9      18       --         2.566 au  H             1.00      1 D:xy            1
                        (      69.819 eV)
    10      19       --         2.566 au  H             1.00      1 D:xz            1
                        (      69.819 eV)
    11      20       --         2.566 au  H             1.00      1 D:yz            1
                        (      69.819 eV)
    12      21      1.000      -0.239 au  H             1.00      1 S               2
                        (      -6.494 eV)
    13      22       --         0.091 au  H             1.00      2 S               2
                        (       2.470 eV)
    14      23       --         1.522 au  H             1.00      3 S               2
                        (      41.412 eV)
    15      24       --         0.405 au  H             1.00      1 P:x             2
                        (      11.031 eV)
    16      25       --         0.405 au  H             1.00      1 P:y             2
                        (      11.031 eV)
    17      26       --         0.405 au  H             1.00      1 P:z             2
                        (      11.031 eV)
    18      27       --         2.566 au  H             1.00      1 D:z2            2
                        (      69.819 eV)
    19      28       --         2.566 au  H             1.00      1 D:x2-y2         2
                        (      69.819 eV)
    20      29       --         2.566 au  H             1.00      1 D:xy            2
                        (      69.819 eV)
    21      30       --         2.566 au  H             1.00      1 D:xz            2
                        (      69.819 eV)
    22      31       --         2.566 au  H             1.00      1 D:yz            2
                        (      69.819 eV)
    23      32      1.000      -0.239 au  H             1.00      1 S               3
                        (      -6.494 eV)
    24      33       --         0.091 au  H             1.00      2 S               3
                        (       2.470 eV)
    25      34       --         1.522 au  H             1.00      3 S               3
                        (      41.412 eV)
    26      35       --         0.405 au  H             1.00      1 P:x             3
                        (      11.031 eV)
    27      36       --         0.405 au  H             1.00      1 P:y             3
                        (      11.031 eV)
    28      37       --         0.405 au  H             1.00      1 P:z             3
                        (      11.031 eV)
    29      38       --         2.566 au  H             1.00      1 D:z2            3
                        (      69.819 eV)
    30      39       --         2.566 au  H             1.00      1 D:x2-y2         3
                        (      69.819 eV)
    31      40       --         2.566 au  H             1.00      1 D:xy            3
                        (      69.819 eV)
    32      41       --         2.566 au  H             1.00      1 D:xz            3
                        (      69.819 eV)
    33      42       --         2.566 au  H             1.00      1 D:yz            3
                        (      69.819 eV)
    34      43      1.000      -0.239 au  H             1.00      1 S               4
                        (      -6.494 eV)
    35      44       --         0.091 au  H             1.00      2 S               4
                        (       2.470 eV)
    36      45       --         1.522 au  H             1.00      3 S               4
                        (      41.412 eV)
    37      46       --         0.405 au  H             1.00      1 P:x             4
                        (      11.031 eV)
    38      47       --         0.405 au  H             1.00      1 P:y             4
                        (      11.031 eV)
    39      48       --         0.405 au  H             1.00      1 P:z             4
                        (      11.031 eV)
    40      49       --         2.566 au  H             1.00      1 D:z2            4
                        (      69.819 eV)
    41      50       --         2.566 au  H             1.00      1 D:x2-y2         4
                        (      69.819 eV)
    42      51       --         2.566 au  H             1.00      1 D:xy            4
                        (      69.819 eV)
    43      52       --         2.566 au  H             1.00      1 D:xz            4
                        (      69.819 eV)
    44      53       --         2.566 au  H             1.00      1 D:yz            4
                        (      69.819 eV)
    45      54      1.000      -0.239 au  H             1.00      1 S               5
                        (      -6.494 eV)
    46      55       --         0.091 au  H             1.00      2 S               5
                        (       2.470 eV)
    47      56       --         1.522 au  H             1.00      3 S               5
                        (      41.412 eV)
    48      57       --         0.405 au  H             1.00      1 P:x             5
                        (      11.031 eV)
    49      58       --         0.405 au  H             1.00      1 P:y             5
                        (      11.031 eV)
    50      59       --         0.405 au  H             1.00      1 P:z             5
                        (      11.031 eV)
    51      60       --         2.566 au  H             1.00      1 D:z2            5
                        (      69.819 eV)
    52      61       --         2.566 au  H             1.00      1 D:x2-y2         5
                        (      69.819 eV)
    53      62       --         2.566 au  H             1.00      1 D:xy            5
                        (      69.819 eV)
    54      63       --         2.566 au  H             1.00      1 D:xz            5
                        (      69.819 eV)
    55      64       --         2.566 au  H             1.00      1 D:yz            5
                        (      69.819 eV)
    56      65      1.000      -0.239 au  H             1.00      1 S               6
                        (      -6.494 eV)
    57      66       --         0.091 au  H             1.00      2 S               6
                        (       2.470 eV)
    58      67       --         1.522 au  H             1.00      3 S               6
                        (      41.412 eV)
    59      68       --         0.405 au  H             1.00      1 P:x             6
                        (      11.031 eV)
    60      69       --         0.405 au  H             1.00      1 P:y             6
                        (      11.031 eV)
    61      70       --         0.405 au  H             1.00      1 P:z             6
                        (      11.031 eV)
    62      71       --         2.566 au  H             1.00      1 D:z2            6
                        (      69.819 eV)
    63      72       --         2.566 au  H             1.00      1 D:x2-y2         6
                        (      69.819 eV)
    64      73       --         2.566 au  H             1.00      1 D:xy            6
                        (      69.819 eV)
    65      74       --         2.566 au  H             1.00      1 D:xz            6
                        (      69.819 eV)
    66      75       --         2.566 au  H             1.00      1 D:yz            6
                        (      69.819 eV)
    67      76      2.000      -0.684 au  N             1.00      1 S               7
                        (     -18.623 eV)
    68      77       --         0.596 au  N             1.00      2 S               7
                        (      16.208 eV)
    69      78       --        12.437 au  N             1.00      3 S               7
                        (     338.438 eV)
    70      79      1.000      -0.261 au  N             1.00      1 P:x             7
                        (      -7.115 eV)
    71      80       --         0.286 au  N             1.00      2 P:x             7
                        (       7.779 eV)
    72      81       --         3.289 au  N             1.00      3 P:x             7
                        (      89.508 eV)
    73      82      1.000      -0.261 au  N             1.00      1 P:y             7
                        (      -7.115 eV)
    74      83       --         0.286 au  N             1.00      2 P:y             7
                        (       7.779 eV)
    75      84       --         3.289 au  N             1.00      3 P:y             7
                        (      89.508 eV)
    76      85      1.000      -0.261 au  N             1.00      1 P:z             7
                        (      -7.115 eV)
    77      86       --         0.286 au  N             1.00      2 P:z             7
                        (       7.779 eV)
    78      87       --         3.289 au  N             1.00      3 P:z             7
                        (      89.508 eV)
    79      88       --         1.242 au  N             1.00      1 D:z2            7
                        (      33.798 eV)
    80      89       --         1.242 au  N             1.00      1 D:x2-y2         7
                        (      33.798 eV)
    81      90       --         1.242 au  N             1.00      1 D:xy            7
                        (      33.798 eV)
    82      91       --         1.242 au  N             1.00      1 D:xz            7
                        (      33.798 eV)
    83      92       --         1.242 au  N             1.00      1 D:yz            7
                        (      33.798 eV)
    84      93       --         4.003 au  N             1.00      1 F:z3            7
                        (     108.933 eV)
    85      94       --         4.003 au  N             1.00      1 F:z             7
                        (     108.933 eV)
    86      95       --         4.003 au  N             1.00      1 F:xyz           7
                        (     108.933 eV)
    87      96       --         4.003 au  N             1.00      1 F:z2x           7
                        (     108.933 eV)
    88      97       --         4.003 au  N             1.00      1 F:z2y           7
                        (     108.933 eV)
    89      98       --         4.003 au  N             1.00      1 F:x             7
                        (     108.933 eV)
    90      99       --         4.003 au  N             1.00      1 F:y             7
                        (     108.933 eV)
    91     100      2.000      -0.684 au  N             1.00      1 S               8
                        (     -18.623 eV)
    92     101       --         0.596 au  N             1.00      2 S               8
                        (      16.208 eV)
    93     102       --        12.437 au  N             1.00      3 S               8
                        (     338.438 eV)
    94     103      1.000      -0.261 au  N             1.00      1 P:x             8
                        (      -7.115 eV)
    95     104       --         0.286 au  N             1.00      2 P:x             8
                        (       7.779 eV)
    96     105       --         3.289 au  N             1.00      3 P:x             8
                        (      89.508 eV)
    97     106      1.000      -0.261 au  N             1.00      1 P:y             8
                        (      -7.115 eV)
    98     107       --         0.286 au  N             1.00      2 P:y             8
                        (       7.779 eV)
    99     108       --         3.289 au  N             1.00      3 P:y             8
                        (      89.508 eV)
   100     109      1.000      -0.261 au  N             1.00      1 P:z             8
                        (      -7.115 eV)
   101     110       --         0.286 au  N             1.00      2 P:z             8
                        (       7.779 eV)
   102     111       --         3.289 au  N             1.00      3 P:z             8
                        (      89.508 eV)
   103     112       --         1.242 au  N             1.00      1 D:z2            8
                        (      33.798 eV)
   104     113       --         1.242 au  N             1.00      1 D:x2-y2         8
                        (      33.798 eV)
   105     114       --         1.242 au  N             1.00      1 D:xy            8
                        (      33.798 eV)
   106     115       --         1.242 au  N             1.00      1 D:xz            8
                        (      33.798 eV)
   107     116       --         1.242 au  N             1.00      1 D:yz            8
                        (      33.798 eV)
   108     117       --         4.003 au  N             1.00      1 F:z3            8
                        (     108.933 eV)
   109     118       --         4.003 au  N             1.00      1 F:z             8
                        (     108.933 eV)
   110     119       --         4.003 au  N             1.00      1 F:xyz           8
                        (     108.933 eV)
   111     120       --         4.003 au  N             1.00      1 F:z2x           8
                        (     108.933 eV)
   112     121       --         4.003 au  N             1.00      1 F:z2y           8
                        (     108.933 eV)
   113     122       --         4.003 au  N             1.00      1 F:x             8
                        (     108.933 eV)
   114     123       --         4.003 au  N             1.00      1 F:y             8
                        (     108.933 eV)
   115     124      2.000      -0.883 au  O             1.00      1 S               9
                        (     -24.021 eV)
   116     125       --         0.906 au  O             1.00      2 S               9
                        (      24.659 eV)
   117     126       --        29.646 au  O             1.00      3 S               9
                        (     806.705 eV)
   118     127      1.333      -0.334 au  O             1.00      1 P:x             9
                        (      -9.088 eV)
   119     128       --         0.352 au  O             1.00      2 P:x             9
                        (       9.588 eV)
   120     129       --         3.835 au  O             1.00      3 P:x             9
                        (     104.368 eV)
   121     130      1.333      -0.334 au  O             1.00      1 P:y             9
                        (      -9.088 eV)
   122     131       --         0.352 au  O             1.00      2 P:y             9
                        (       9.588 eV)
   123     132       --         3.835 au  O             1.00      3 P:y             9
                        (     104.368 eV)
   124     133      1.333      -0.334 au  O             1.00      1 P:z             9
                        (      -9.088 eV)
   125     134       --         0.352 au  O             1.00      2 P:z             9
                        (       9.588 eV)
   126     135       --         3.835 au  O             1.00      3 P:z             9
                        (     104.368 eV)
   127     136       --         1.066 au  O             1.00      1 D:z2            9
                        (      29.007 eV)
   128     137       --         1.066 au  O             1.00      1 D:x2-y2         9
                        (      29.007 eV)
   129     138       --         1.066 au  O             1.00      1 D:xy            9
                        (      29.007 eV)
   130     139       --         1.066 au  O             1.00      1 D:xz            9
                        (      29.007 eV)
   131     140       --         1.066 au  O             1.00      1 D:yz            9
                        (      29.007 eV)
   132     141       --         3.351 au  O             1.00      1 F:z3            9
                        (      91.190 eV)
   133     142       --         3.351 au  O             1.00      1 F:z             9
                        (      91.190 eV)
   134     143       --         3.351 au  O             1.00      1 F:xyz           9
                        (      91.190 eV)
   135     144       --         3.351 au  O             1.00      1 F:z2x           9
                        (      91.190 eV)
   136     145       --         3.351 au  O             1.00      1 F:z2y           9
                        (      91.190 eV)
   137     146       --         3.351 au  O             1.00      1 F:x             9
                        (      91.190 eV)
   138     147       --         3.351 au  O             1.00      1 F:y             9
                        (      91.190 eV)
   139     148      2.000      -0.507 au  C             1.00      1 S              10
                        (     -13.801 eV)
   140     149       --         0.435 au  C             1.00      2 S              10
                        (      11.837 eV)
   141     150       --         9.943 au  C             1.00      3 S              10
                        (     270.574 eV)
   142     151      0.667      -0.196 au  C             1.00      1 P:x            10
                        (      -5.325 eV)
   143     152       --         0.171 au  C             1.00      2 P:x            10
                        (       4.656 eV)
   144     153       --         2.025 au  C             1.00      3 P:x            10
                        (      55.112 eV)
   145     154      0.667      -0.196 au  C             1.00      1 P:y            10
                        (      -5.325 eV)
   146     155       --         0.171 au  C             1.00      2 P:y            10
                        (       4.656 eV)
   147     156       --         2.025 au  C             1.00      3 P:y            10
                        (      55.112 eV)
   148     157      0.667      -0.196 au  C             1.00      1 P:z            10
                        (      -5.325 eV)
   149     158       --         0.171 au  C             1.00      2 P:z            10
                        (       4.656 eV)
   150     159       --         2.025 au  C             1.00      3 P:z            10
                        (      55.112 eV)
   151     160       --         1.235 au  C             1.00      1 D:z2           10
                        (      33.593 eV)
   152     161       --         1.235 au  C             1.00      1 D:x2-y2        10
                        (      33.593 eV)
   153     162       --         1.235 au  C             1.00      1 D:xy           10
                        (      33.593 eV)
   154     163       --         1.235 au  C             1.00      1 D:xz           10
                        (      33.593 eV)
   155     164       --         1.235 au  C             1.00      1 D:yz           10
                        (      33.593 eV)
   156     165       --         4.008 au  C             1.00      1 F:z3           10
                        (     109.051 eV)
   157     166       --         4.008 au  C             1.00      1 F:z            10
                        (     109.051 eV)
   158     167       --         4.008 au  C             1.00      1 F:xyz          10
                        (     109.051 eV)
   159     168       --         4.008 au  C             1.00      1 F:z2x          10
                        (     109.051 eV)
   160     169       --         4.008 au  C             1.00      1 F:z2y          10
                        (     109.051 eV)
   161     170       --         4.008 au  C             1.00      1 F:x            10
                        (     109.051 eV)
   162     171       --         4.008 au  C             1.00      1 F:y            10
                        (     109.051 eV)
   163     172      2.000      -0.507 au  C             1.00      1 S              11
                        (     -13.801 eV)
   164     173       --         0.435 au  C             1.00      2 S              11
                        (      11.837 eV)
   165     174       --         9.943 au  C             1.00      3 S              11
                        (     270.574 eV)
   166     175      0.667      -0.196 au  C             1.00      1 P:x            11
                        (      -5.325 eV)
   167     176       --         0.171 au  C             1.00      2 P:x            11
                        (       4.656 eV)
   168     177       --         2.025 au  C             1.00      3 P:x            11
                        (      55.112 eV)
   169     178      0.667      -0.196 au  C             1.00      1 P:y            11
                        (      -5.325 eV)
   170     179       --         0.171 au  C             1.00      2 P:y            11
                        (       4.656 eV)
   171     180       --         2.025 au  C             1.00      3 P:y            11
                        (      55.112 eV)
   172     181      0.667      -0.196 au  C             1.00      1 P:z            11
                        (      -5.325 eV)
   173     182       --         0.171 au  C             1.00      2 P:z            11
                        (       4.656 eV)
   174     183       --         2.025 au  C             1.00      3 P:z            11
                        (      55.112 eV)
   175     184       --         1.235 au  C             1.00      1 D:z2           11
                        (      33.593 eV)
   176     185       --         1.235 au  C             1.00      1 D:x2-y2        11
                        (      33.593 eV)
   177     186       --         1.235 au  C             1.00      1 D:xy           11
                        (      33.593 eV)
   178     187       --         1.235 au  C             1.00      1 D:xz           11
                        (      33.593 eV)
   179     188       --         1.235 au  C             1.00      1 D:yz           11
                        (      33.593 eV)
   180     189       --         4.008 au  C             1.00      1 F:z3           11
                        (     109.051 eV)
   181     190       --         4.008 au  C             1.00      1 F:z            11
                        (     109.051 eV)
   182     191       --         4.008 au  C             1.00      1 F:xyz          11
                        (     109.051 eV)
   183     192       --         4.008 au  C             1.00      1 F:z2x          11
                        (     109.051 eV)
   184     193       --         4.008 au  C             1.00      1 F:z2y          11
                        (     109.051 eV)
   185     194       --         4.008 au  C             1.00      1 F:x            11
                        (     109.051 eV)
   186     195       --         4.008 au  C             1.00      1 F:y            11
                        (     109.051 eV)
   187     196      2.000      -0.507 au  C             1.00      1 S              12
                        (     -13.801 eV)
   188     197       --         0.435 au  C             1.00      2 S              12
                        (      11.837 eV)
   189     198       --         9.943 au  C             1.00      3 S              12
                        (     270.574 eV)
   190     199      0.667      -0.196 au  C             1.00      1 P:x            12
                        (      -5.325 eV)
   191     200       --         0.171 au  C             1.00      2 P:x            12
                        (       4.656 eV)
   192     201       --         2.025 au  C             1.00      3 P:x            12
                        (      55.112 eV)
   193     202      0.667      -0.196 au  C             1.00      1 P:y            12
                        (      -5.325 eV)
   194     203       --         0.171 au  C             1.00      2 P:y            12
                        (       4.656 eV)
   195     204       --         2.025 au  C             1.00      3 P:y            12
                        (      55.112 eV)
   196     205      0.667      -0.196 au  C             1.00      1 P:z            12
                        (      -5.325 eV)
   197     206       --         0.171 au  C             1.00      2 P:z            12
                        (       4.656 eV)
   198     207       --         2.025 au  C             1.00      3 P:z            12
                        (      55.112 eV)
   199     208       --         1.235 au  C             1.00      1 D:z2           12
                        (      33.593 eV)
   200     209       --         1.235 au  C             1.00      1 D:x2-y2        12
                        (      33.593 eV)
   201     210       --         1.235 au  C             1.00      1 D:xy           12
                        (      33.593 eV)
   202     211       --         1.235 au  C             1.00      1 D:xz           12
                        (      33.593 eV)
   203     212       --         1.235 au  C             1.00      1 D:yz           12
                        (      33.593 eV)
   204     213       --         4.008 au  C             1.00      1 F:z3           12
                        (     109.051 eV)
   205     214       --         4.008 au  C             1.00      1 F:z            12
                        (     109.051 eV)
   206     215       --         4.008 au  C             1.00      1 F:xyz          12
                        (     109.051 eV)
   207     216       --         4.008 au  C             1.00      1 F:z2x          12
                        (     109.051 eV)
   208     217       --         4.008 au  C             1.00      1 F:z2y          12
                        (     109.051 eV)
   209     218       --         4.008 au  C             1.00      1 F:x            12
                        (     109.051 eV)
   210     219       --         4.008 au  C             1.00      1 F:y            12
                        (     109.051 eV)
   211     220      2.000      -0.507 au  C             1.00      1 S              13
                        (     -13.801 eV)
   212     221       --         0.435 au  C             1.00      2 S              13
                        (      11.837 eV)
   213     222       --         9.943 au  C             1.00      3 S              13
                        (     270.574 eV)
   214     223      0.667      -0.196 au  C             1.00      1 P:x            13
                        (      -5.325 eV)
   215     224       --         0.171 au  C             1.00      2 P:x            13
                        (       4.656 eV)
   216     225       --         2.025 au  C             1.00      3 P:x            13
                        (      55.112 eV)
   217     226      0.667      -0.196 au  C             1.00      1 P:y            13
                        (      -5.325 eV)
   218     227       --         0.171 au  C             1.00      2 P:y            13
                        (       4.656 eV)
   219     228       --         2.025 au  C             1.00      3 P:y            13
                        (      55.112 eV)
   220     229      0.667      -0.196 au  C             1.00      1 P:z            13
                        (      -5.325 eV)
   221     230       --         0.171 au  C             1.00      2 P:z            13
                        (       4.656 eV)
   222     231       --         2.025 au  C             1.00      3 P:z            13
                        (      55.112 eV)
   223     232       --         1.235 au  C             1.00      1 D:z2           13
                        (      33.593 eV)
   224     233       --         1.235 au  C             1.00      1 D:x2-y2        13
                        (      33.593 eV)
   225     234       --         1.235 au  C             1.00      1 D:xy           13
                        (      33.593 eV)
   226     235       --         1.235 au  C             1.00      1 D:xz           13
                        (      33.593 eV)
   227     236       --         1.235 au  C             1.00      1 D:yz           13
                        (      33.593 eV)
   228     237       --         4.008 au  C             1.00      1 F:z3           13
                        (     109.051 eV)
   229     238       --         4.008 au  C             1.00      1 F:z            13
                        (     109.051 eV)
   230     239       --         4.008 au  C             1.00      1 F:xyz          13
                        (     109.051 eV)
   231     240       --         4.008 au  C             1.00      1 F:z2x          13
                        (     109.051 eV)
   232     241       --         4.008 au  C             1.00      1 F:z2y          13
                        (     109.051 eV)
   233     242       --         4.008 au  C             1.00      1 F:x            13
                        (     109.051 eV)
   234     243       --         4.008 au  C             1.00      1 F:y            13
                        (     109.051 eV)
   235     244      2.000      -0.507 au  C             1.00      1 S              14
                        (     -13.801 eV)
   236     245       --         0.435 au  C             1.00      2 S              14
                        (      11.837 eV)
   237     246       --         9.943 au  C             1.00      3 S              14
                        (     270.574 eV)
   238     247      0.667      -0.196 au  C             1.00      1 P:x            14
                        (      -5.325 eV)
   239     248       --         0.171 au  C             1.00      2 P:x            14
                        (       4.656 eV)
   240     249       --         2.025 au  C             1.00      3 P:x            14
                        (      55.112 eV)
   241     250      0.667      -0.196 au  C             1.00      1 P:y            14
                        (      -5.325 eV)
   242     251       --         0.171 au  C             1.00      2 P:y            14
                        (       4.656 eV)
   243     252       --         2.025 au  C             1.00      3 P:y            14
                        (      55.112 eV)
   244     253      0.667      -0.196 au  C             1.00      1 P:z            14
                        (      -5.325 eV)
   245     254       --         0.171 au  C             1.00      2 P:z            14
                        (       4.656 eV)
   246     255       --         2.025 au  C             1.00      3 P:z            14
                        (      55.112 eV)
   247     256       --         1.235 au  C             1.00      1 D:z2           14
                        (      33.593 eV)
   248     257       --         1.235 au  C             1.00      1 D:x2-y2        14
                        (      33.593 eV)
   249     258       --         1.235 au  C             1.00      1 D:xy           14
                        (      33.593 eV)
   250     259       --         1.235 au  C             1.00      1 D:xz           14
                        (      33.593 eV)
   251     260       --         1.235 au  C             1.00      1 D:yz           14
                        (      33.593 eV)
   252     261       --         4.008 au  C             1.00      1 F:z3           14
                        (     109.051 eV)
   253     262       --         4.008 au  C             1.00      1 F:z            14
                        (     109.051 eV)
   254     263       --         4.008 au  C             1.00      1 F:xyz          14
                        (     109.051 eV)
   255     264       --         4.008 au  C             1.00      1 F:z2x          14
                        (     109.051 eV)
   256     265       --         4.008 au  C             1.00      1 F:z2y          14
                        (     109.051 eV)
   257     266       --         4.008 au  C             1.00      1 F:x            14
                        (     109.051 eV)
   258     267       --         4.008 au  C             1.00      1 F:y            14
                        (     109.051 eV)
   259     268      2.000      -7.781 au  S             1.00      1 S              15
                        (    -211.719 eV)
   260     269      2.000      -0.635 au  S             1.00      2 S              15
                        (     -17.267 eV)
   261     270       --         0.196 au  S             1.00      3 S              15
                        (       5.346 eV)
   262     271       --         2.068 au  S             1.00      4 S              15
                        (      56.265 eV)
   263     272       --        14.332 au  S             1.00      5 S              15
                        (     390.005 eV)
   264     273      2.000      -5.744 au  S             1.00      1 P:x            15
                        (    -156.314 eV)
   265     274      1.333      -0.258 au  S             1.00      2 P:x            15
                        (      -7.014 eV)
   266     275       --         0.128 au  S             1.00      3 P:x            15
                        (       3.474 eV)
   267     276       --         1.096 au  S             1.00      4 P:x            15
                        (      29.823 eV)
   268     277       --        12.382 au  S             1.00      5 P:x            15
                        (     336.920 eV)
   269     278      2.000      -5.744 au  S             1.00      1 P:y            15
                        (    -156.314 eV)
   270     279      1.333      -0.258 au  S             1.00      2 P:y            15
                        (      -7.014 eV)
   271     280       --         0.128 au  S             1.00      3 P:y            15
                        (       3.474 eV)
   272     281       --         1.096 au  S             1.00      4 P:y            15
                        (      29.823 eV)
   273     282       --        12.382 au  S             1.00      5 P:y            15
                        (     336.920 eV)
   274     283      2.000      -5.744 au  S             1.00      1 P:z            15
                        (    -156.314 eV)
   275     284      1.333      -0.258 au  S             1.00      2 P:z            15
                        (      -7.014 eV)
   276     285       --         0.128 au  S             1.00      3 P:z            15
                        (       3.474 eV)
   277     286       --         1.096 au  S             1.00      4 P:z            15
                        (      29.823 eV)
   278     287       --        12.382 au  S             1.00      5 P:z            15
                        (     336.920 eV)
   279     288       --         0.429 au  S             1.00      1 D:z2           15
                        (      11.667 eV)
   280     289       --         0.429 au  S             1.00      1 D:x2-y2        15
                        (      11.667 eV)
   281     290       --         0.429 au  S             1.00      1 D:xy           15
                        (      11.667 eV)
   282     291       --         0.429 au  S             1.00      1 D:xz           15
                        (      11.667 eV)
   283     292       --         0.429 au  S             1.00      1 D:yz           15
                        (      11.667 eV)
   284     293       --         1.269 au  S             1.00      1 F:z3           15
                        (      34.525 eV)
   285     294       --         1.269 au  S             1.00      1 F:z            15
                        (      34.525 eV)
   286     295       --         1.269 au  S             1.00      1 F:xyz          15
                        (      34.525 eV)
   287     296       --         1.269 au  S             1.00      1 F:z2x          15
                        (      34.525 eV)
   288     297       --         1.269 au  S             1.00      1 F:z2y          15
                        (      34.525 eV)
   289     298       --         1.269 au  S             1.00      1 F:x            15
                        (      34.525 eV)
   290     299       --         1.269 au  S             1.00      1 F:y            15
                        (      34.525 eV)


 ================================
 (Slater-type)  F U N C T I O N S  ***  (Basis and Fit)  ***
 ================================
  

 Atom Type    1  (H)
 ==============

 Valence Basis Sets:   5
 -----------------------
   1 S    0.690000
   1 S    0.920000
   1 S    1.580000
   2 P    1.250000
   3 D    2.500000

 Atom Type    2  (N)
 ==============

 Valence Basis Sets:   9
 -----------------------
   1 S    6.380000
   2 S    1.500000
   2 S    2.500000
   2 S    5.150000
   2 P    1.000000
   2 P    1.880000
   2 P    3.680000
   3 D    2.200000
   4 F    3.300000

 Frozen Core Shells
 ------------------
    S:  1

 Atom Type    3  (O)
 ==============

 Valence Basis Sets:   9
 -----------------------
   1 S    7.360000
   2 S    1.720000
   2 S    2.880000
   2 S    7.580000
   2 P    1.120000
   2 P    2.080000
   2 P    4.080000
   3 D    2.000000
   4 F    3.000000

 Frozen Core Shells
 ------------------
    S:  1

 Atom Type    4  (C)
 ==============

 Valence Basis Sets:   9
 -----------------------
   1 S    5.400000
   2 S    1.280000
   2 S    2.100000
   2 S    4.600000
   2 P    0.820000
   2 P    1.480000
   2 P    2.940000
   3 D    2.200000
   4 F    3.300000

 Frozen Core Shells
 ------------------
    S:  1

 Atom Type    5  (S)
 ==============

 Valence Basis Sets:  13
 -----------------------
   1 S   13.450000
   2 S    5.900000
   2 S    4.250000
   2 P    8.050000
   2 P    4.550000
   3 S    1.500000
   3 S    2.250000
   3 S    3.400000
   3 P    1.000000
   3 P    1.600000
   3 P    2.450000
   3 D    2.100000
   4 F    2.100000

 Frozen Core Shells
 ------------------
    S:  1


 BAS: List of all Elementary Cartesian Basis Functions
 =====================================================

 The numbering in the list below (to the right of the function characteristics) is referred
 to in print-outs of MO eigenvectors and Mulliken populations in the BAS representation
 (as contrasted to the SFO representation).

 Notes:
 1. The functions are characterized by a polynomial prefactor (powers of x,y,z and r) and
    an exponential decay factor alpha.
 2. Since the basis sets are specific for an atom TYPE, the individual functions occur on
    all atoms of that type.
 3. The word 'Core' in the left margin signals that it is a Core Function (CF) : not a
    degree of freedom in the valence set, but only used to ensure orthogonalization of
    the other valence basis functions on the frozen Core Orbitals.


 (power of) X  Y  Z  R     Alpha  on Atom
            ==========     =====     ==========

 H                                    1    2    3    4    5    6
                                  ---------------------------------------------------------------------------
            0  0  0  0     0.690      1   13   25   37   49   61
            0  0  0  0     0.920      2   14   26   38   50   62
            0  0  0  0     1.580      3   15   27   39   51   63
            1  0  0  0     1.250      4   16   28   40   52   64
            0  1  0  0     1.250      5   17   29   41   53   65
            0  0  1  0     1.250      6   18   30   42   54   66
            2  0  0  0     2.500      7   19   31   43   55   67
            1  1  0  0     2.500      8   20   32   44   56   68
            1  0  1  0     2.500      9   21   33   45   57   69
            0  2  0  0     2.500     10   22   34   46   58   70
            0  1  1  0     2.500     11   23   35   47   59   71
            0  0  2  0     2.500     12   24   36   48   60   72

 N                                    7    8
                                  ---------------------------------------------------------------------------
    Core    0  0  0  0     6.380     73  102
            0  0  0  1     1.500     74  103
            0  0  0  1     2.500     75  104
            0  0  0  1     5.150     76  105
            1  0  0  0     1.000     77  106
            0  1  0  0     1.000     78  107
            0  0  1  0     1.000     79  108
            1  0  0  0     1.880     80  109
            0  1  0  0     1.880     81  110
            0  0  1  0     1.880     82  111
            1  0  0  0     3.680     83  112
            0  1  0  0     3.680     84  113
            0  0  1  0     3.680     85  114
            2  0  0  0     2.200     86  115
            1  1  0  0     2.200     87  116
            1  0  1  0     2.200     88  117
            0  2  0  0     2.200     89  118
            0  1  1  0     2.200     90  119
            0  0  2  0     2.200     91  120
            3  0  0  0     3.300     92  121
            2  1  0  0     3.300     93  122
            2  0  1  0     3.300     94  123
            1  2  0  0     3.300     95  124
            1  1  1  0     3.300     96  125
            1  0  2  0     3.300     97  126
            0  3  0  0     3.300     98  127
            0  2  1  0     3.300     99  128
            0  1  2  0     3.300    100  129
            0  0  3  0     3.300    101  130

 O                                    9
                                  ---------------------------------------------------------------------------
    Core    0  0  0  0     7.360    131
            0  0  0  1     1.720    132
            0  0  0  1     2.880    133
            0  0  0  1     7.580    134
            1  0  0  0     1.120    135
            0  1  0  0     1.120    136
            0  0  1  0     1.120    137
            1  0  0  0     2.080    138
            0  1  0  0     2.080    139
            0  0  1  0     2.080    140
            1  0  0  0     4.080    141
            0  1  0  0     4.080    142
            0  0  1  0     4.080    143
            2  0  0  0     2.000    144
            1  1  0  0     2.000    145
            1  0  1  0     2.000    146
            0  2  0  0     2.000    147
            0  1  1  0     2.000    148
            0  0  2  0     2.000    149
            3  0  0  0     3.000    150
            2  1  0  0     3.000    151
            2  0  1  0     3.000    152
            1  2  0  0     3.000    153
            1  1  1  0     3.000    154
            1  0  2  0     3.000    155
            0  3  0  0     3.000    156
            0  2  1  0     3.000    157
            0  1  2  0     3.000    158
            0  0  3  0     3.000    159

 C                                   10   11   12   13   14
                                  ---------------------------------------------------------------------------
    Core    0  0  0  0     5.400    160  189  218  247  276
            0  0  0  1     1.280    161  190  219  248  277
            0  0  0  1     2.100    162  191  220  249  278
            0  0  0  1     4.600    163  192  221  250  279
            1  0  0  0     0.820    164  193  222  251  280
            0  1  0  0     0.820    165  194  223  252  281
            0  0  1  0     0.820    166  195  224  253  282
            1  0  0  0     1.480    167  196  225  254  283
            0  1  0  0     1.480    168  197  226  255  284
            0  0  1  0     1.480    169  198  227  256  285
            1  0  0  0     2.940    170  199  228  257  286
            0  1  0  0     2.940    171  200  229  258  287
            0  0  1  0     2.940    172  201  230  259  288
            2  0  0  0     2.200    173  202  231  260  289
            1  1  0  0     2.200    174  203  232  261  290
            1  0  1  0     2.200    175  204  233  262  291
            0  2  0  0     2.200    176  205  234  263  292
            0  1  1  0     2.200    177  206  235  264  293
            0  0  2  0     2.200    178  207  236  265  294
            3  0  0  0     3.300    179  208  237  266  295
            2  1  0  0     3.300    180  209  238  267  296
            2  0  1  0     3.300    181  210  239  268  297
            1  2  0  0     3.300    182  211  240  269  298
            1  1  1  0     3.300    183  212  241  270  299
            1  0  2  0     3.300    184  213  242  271  300
            0  3  0  0     3.300    185  214  243  272  301
            0  2  1  0     3.300    186  215  244  273  302
            0  1  2  0     3.300    187  216  245  274  303
            0  0  3  0     3.300    188  217  246  275  304

 S                                   15
                                  ---------------------------------------------------------------------------
    Core    0  0  0  0    13.450    305
            0  0  0  1     5.900    306
            0  0  0  1     4.250    307
            1  0  0  0     8.050    308
            0  1  0  0     8.050    309
            0  0  1  0     8.050    310
            1  0  0  0     4.550    311
            0  1  0  0     4.550    312
            0  0  1  0     4.550    313
            0  0  0  2     1.500    314
            0  0  0  2     2.250    315
            0  0  0  2     3.400    316
            1  0  0  1     1.000    317
            0  1  0  1     1.000    318
            0  0  1  1     1.000    319
            1  0  0  1     1.600    320
            0  1  0  1     1.600    321
            0  0  1  1     1.600    322
            1  0  0  1     2.450    323
            0  1  0  1     2.450    324
            0  0  1  1     2.450    325
            2  0  0  0     2.100    326
            1  1  0  0     2.100    327
            1  0  1  0     2.100    328
            0  2  0  0     2.100    329
            0  1  1  0     2.100    330
            0  0  2  0     2.100    331
            3  0  0  0     2.100    332
            2  1  0  0     2.100    333
            2  0  1  0     2.100    334
            1  2  0  0     2.100    335
            1  1  1  0     2.100    336
            1  0  2  0     2.100    337
            0  3  0  0     2.100    338
            0  2  1  0     2.100    339
            0  1  2  0     2.100    340
            0  0  3  0     2.100    341

 Total number of charge fitting functions (nprimf)      1062
 Total number of Cartesian basis functions (naos)        341
 Total number of Cartesian core functions  (ncos)          9


 Coordinates (Cartesian)
 =======================

     Atom                    bohr                                 angstrom                 Geometric Variables
                   X           Y           Z              X           Y           Z       (0:frozen, *:LT par.)
 --------------------------------------------------------------------------------------------------------------
     1 H      -5.019302    0.271365   -1.689604      -2.656100    0.143600   -0.894100      1       2       3
     2 H       2.737646   -4.580507   -0.674065       1.448700   -2.423900   -0.356700      4       5       6
     3 N       2.109690   -2.752008   -0.404779       1.116400   -1.456300   -0.214200      7       8       9
     4 N       2.966870    1.766138    0.261916       1.570000    0.934600    0.138600     10      11      12
     5 O      -1.913348   -4.012267   -0.592618      -1.012500   -2.123200   -0.313600     13      14      15
     6 H       4.209932    3.252408    0.481691       2.227800    1.721100    0.254900     16      17      18
     7 C      -0.412338   -2.275797   -0.335804      -0.218200   -1.204300   -0.177700     19      20      21
     8 C      -1.350776    0.349599    0.050834      -0.714800    0.185000    0.026900     22      23      24
     9 C       0.323332    2.248774    0.331004       0.171100    1.190000    0.175160     25      26      27
    10 C       3.872994   -0.740206   -0.107336       2.049500   -0.391700   -0.056800     28      29      30
    11 C      -4.149839    0.863416    0.125289      -2.196000    0.456900    0.066300     31      32      33
    12 H      -0.330891    4.173838    0.615295      -0.175100    2.208700    0.325600     34      35      36
    13 H      -5.021002   -0.227334    1.691305      -2.657000   -0.120300    0.895000     37      38      39
    14 H      -4.570303    2.898840    0.425188      -2.418500    1.534000    0.225000     40      41      42
    15 S       6.547145   -1.236070   -0.179146       3.464600   -0.654100   -0.094800     43      44      45
 --------------------------------------------------------------------------------------------------------------
1
 ***************************************************************************************************


                                              ***********************
                                              *  T E C H N I C A L  *
                                              ***********************
  


 =============================================================
 P A R A L L E L I Z A T I O N  and  V E C T O R I Z A T I O N
 =============================================================
  
 Nr of parallel processes:                               16
 Maximum vector length in NumInt loops:                 128

 IO buffersize (Mb):                                     64.000000


 ===============================
 G E O M E T R Y   U P D A T E S
 ===============================
  
 Optimization coordinates:                       Delocalized
 Optimization code branch:                       NEW
 Hessian update method:                          BFGS (Broyden-Fletcher-Goldfarb-Shanno)

 Iterative Geometry Improvements:
    Max. nr. of iterations:                      10000
    Convergence criteria:
         Change in energy (hartree):                 0.0010000000
         Gradients (au/Angstrom):                    0.0010000000
         Cart/bondlength changes (Angstrom):         0.0100000000
    Max. step to take:
         Trust Radius:                               0.2000000000

 GDIIS (Geometry Direct Inversion in Iteration Space):
    First geometry cycle:                            0
    Max. number expansion vectors:                   5


 =====================
 S C F   U P D A T E S
 =====================
  
 Max. nr. of cycles:                             10000
 Convergence criterion:                              0.0000000100
   secondary criterion:                              0.0000010000

 Mix parameter (when DIIS does not apply):           0.2000000000
 Mixed ADIIS+DIIS will be used
    Max number of expansion vectors:                10
    Pure ADIIS when Max([F,P]) is above              0.1000000000
    Pure DIIS when Max([F,P]) is below               0.0010000000


 =================
 P R E C I S I O N  ***  (General: NumInt, NeglectFunctionTails, ...)  ***
 =================
  

 NumInt:           Target precision:                 6.0000000000
 -------           Initial precision:                6.0000000000
                   Min. precision (optimization):    6.0000000000

 Neglect Functions:          Basis functions:        0.1000000000E-07
 ------------------          Fit functions:          0.1000000000E-07


 ===========================
 L I N E A R   S C A L I N G
 ===========================
  

 Cut-off radii density fit:                        0.1000000000E-09
 Overlap cut-off criterion AO matrix elements:     0.1000000000E-07
 Cut-offs for Coulomb potential and fitted density:0.1000000000E-09
 Cut-off criterion for Coulomb multipole terms:    0.1000000000E-09
 Progressive Convergence parameter:                 0.000000000    
1
 ***************************************************************************************************


                                            ***************************
                                            *  C O M P U T A T I O N  *
                                            ***************************
  

 Number of elements of the density matrix on this node (used, total):      4029     58311


 ===========================================
 Numerical Integration : Fuzzy Cells (Becke)
 ===========================================
  
 Becke grid quality: GOOD           
  
 Lebedev angular grid order:             min:  11 max:  31
 Nr. of radial points:                   min:  54 max:  69

 Total nr. of points:     189012
 Nr. of blocks:             1477
 Block length:               128
 Nr. of dummy points:         44


 Test of Precision of the Numerical Integration Grid
 ===================================================

 Integral of the Total Core Density:                  17.99999480627342
 Relative Error:                                      -2.885E-07


 ========================
 Density Fitting (zlmFit)
 ========================
  
 ZlmFit Fit Quality: GOOD           
  
 Max L-expansion:                        min:   8 max:   9
 Nr. of radial interpolation points:     min:  78 max: 108


 =====
 S C F  ***  ScaSCF  ***
 =====
  
 Initial density matrix is calculated as sum of fragments

 CYCLE    1
 SCF Error: norm([F,P])=      2.741568405088, max([F,P])=      0.319680836212
 ***** SPIN 1 *****
 orbitals (Q,E):
 ---------------
 A :20...39          ( 1.00    -0.5305)  ( 1.00    -0.5123)  ( 1.00    -0.4891)  ( 1.00    -0.4660)
                     ( 1.00    -0.4352)  ( 1.00    -0.4070)  ( 1.00    -0.3832)  ( 1.00    -0.3266)
                     ( 1.00    -0.3059)  ( 1.00    -0.2011)  ( 0.00    -0.1621)  ( 0.00    -0.0801)
                     ( 0.00    -0.0705)  ( 0.00    -0.0561)  ( 0.00    -0.0470)  ( 0.00    -0.0212)
                     ( 0.00    -0.0148)  ( 0.00    -0.0107)  ( 0.00    -0.0007)  ( 0.00     0.0070)
 ***** SPIN 2 *****
 orbitals (Q,E):
 ---------------
 A :18...37          ( 1.00    -0.5522)  ( 1.00    -0.5351)  ( 1.00    -0.5305)  ( 1.00    -0.5123)
                     ( 1.00    -0.4891)  ( 1.00    -0.4660)  ( 1.00    -0.4352)  ( 1.00    -0.4070)
                     ( 1.00    -0.3832)  ( 1.00    -0.3266)  ( 0.00    -0.3059)  ( 0.00    -0.2011)
                     ( 0.00    -0.1621)  ( 0.00    -0.0801)  ( 0.00    -0.0705)  ( 0.00    -0.0561)
                     ( 0.00    -0.0470)  ( 0.00    -0.0212)  ( 0.00    -0.0148)  ( 0.00    -0.0107)
  
 Spin polar: 2 (Spin_A minus Spin_B electrons)

 CYCLE    2
  SDIIS (wt  0.000):  0.2754  0.7246
 A-DIIS (wt  1.000):  0.1956  0.8044
  DIIS coefficients:  0.1956  0.8044
 SCF Error: norm([F,P])=      1.464055157930, max([F,P])=      0.129690133853
 ***** SPIN 1 *****
 orbitals (Q,E):
 ---------------
 A :20...30          ( 1.00    -0.2149)  ( 1.00    -0.2147)  ( 1.00    -0.2042)  ( 1.00    -0.1757)
                     ( 1.00    -0.1451)  ( 1.00    -0.1306)  ( 1.00    -0.1076)  ( 1.00    -0.0886)
                     ( 1.00    -0.0554)  ( 1.00    -0.0510)  ( 0.00    -0.0160)
 ***** SPIN 2 *****
 orbitals (Q,E):
 ---------------
 A :18...28          ( 1.00    -0.2979)  ( 1.00    -0.2966)  ( 1.00    -0.2122)  ( 1.00    -0.2073)
                     ( 1.00    -0.2008)  ( 1.00    -0.1721)  ( 1.00    -0.1353)  ( 1.00    -0.1278)
                     ( 1.00    -0.1040)  ( 1.00    -0.0747)  ( 0.00    -0.0487)
  
 Spin polar: 2 (Spin_A minus Spin_B electrons)

 CYCLE    3
  SDIIS (wt  0.000):  0.1655  0.6776  0.1569
 A-DIIS (wt  1.000):  0.0000  0.8522  0.1478
  DIIS coefficients:  0.0000  0.8522  0.1478
 SCF Error: norm([F,P])=      4.315065328824, max([F,P])=      0.425723920802
 ***** SPIN 1 *****
 orbitals (Q,E):
 ---------------
 A :20...30          ( 1.00    -0.2998)  ( 1.00    -0.2646)  ( 1.00    -0.2632)  ( 1.00    -0.2411)
                     ( 1.00    -0.2305)  ( 1.00    -0.2068)  ( 1.00    -0.1931)  ( 1.00    -0.1549)
                     ( 1.00    -0.1179)  ( 1.00    -0.0153)  ( 0.00    -0.0120)
 ***** SPIN 2 *****
 orbitals (Q,E):
 ---------------
 A :18...28          ( 1.00    -0.3152)  ( 1.00    -0.3064)  ( 1.00    -0.2813)  ( 1.00    -0.2602)
                     ( 1.00    -0.2411)  ( 1.00    -0.2316)  ( 1.00    -0.2182)  ( 1.00    -0.2039)
                     ( 1.00    -0.1805)  ( 1.00    -0.1499)  ( 0.00    -0.1035)
  
 Spin polar: 2 (Spin_A minus Spin_B electrons)

 CYCLE    4
  SDIIS (wt  0.045):  0.5172  0.0148  0.4680
 A-DIIS (wt  0.955):  0.5177  0.0000  0.4823
  DIIS coefficients:  0.5177  0.0007  0.4816
 SCF Error: norm([F,P])=      1.521404040785, max([F,P])=      0.095564429835
 ***** SPIN 1 *****
 orbitals (Q,E):
 ---------------
 A :20...30          ( 1.00    -0.3679)  ( 1.00    -0.3554)  ( 1.00    -0.3496)  ( 1.00    -0.3220)
                     ( 1.00    -0.2677)  ( 1.00    -0.2498)  ( 1.00    -0.2416)  ( 1.00    -0.1966)
                     ( 1.00    -0.1188)  ( 1.00    -0.0996)  ( 0.00    -0.0650)
 ***** SPIN 2 *****
 orbitals (Q,E):
 ---------------
 A :18...28          ( 1.00    -0.3793)  ( 1.00    -0.3778)  ( 1.00    -0.3623)  ( 1.00    -0.3477)
                     ( 1.00    -0.3392)  ( 1.00    -0.3058)  ( 1.00    -0.2574)  ( 1.00    -0.2222)
                     ( 1.00    -0.2216)  ( 1.00    -0.1819)  ( 0.00    -0.1150)
  
 Spin polar: 2 (Spin_A minus Spin_B electrons)

 CYCLE    5
  SDIIS (wt  0.000):  0.4193 -0.0289  0.4315  0.1781
 A-DIIS (wt  1.000):  0.4424  0.0000  0.3771  0.1805
  DIIS coefficients:  0.4424  0.0000  0.3771  0.1805
 SCF Error: norm([F,P])=      1.770970151353, max([F,P])=      0.233777887246
 ***** SPIN 1 *****
 orbitals (Q,E):
 ---------------
 A :20...30          ( 1.00    -0.3658)  ( 1.00    -0.3637)  ( 1.00    -0.3534)  ( 1.00    -0.3347)
                     ( 1.00    -0.3042)  ( 1.00    -0.2604)  ( 1.00    -0.2534)  ( 1.00    -0.2283)
                     ( 1.00    -0.2061)  ( 1.00    -0.0770)  ( 0.00    -0.0631)
 ***** SPIN 2 *****
 orbitals (Q,E):
 ---------------
 A :18...28          ( 1.00    -0.3776)  ( 1.00    -0.3679)  ( 1.00    -0.3575)  ( 1.00    -0.3514)
                     ( 1.00    -0.3468)  ( 1.00    -0.3316)  ( 1.00    -0.2870)  ( 1.00    -0.2419)
                     ( 1.00    -0.2388)  ( 1.00    -0.1991)  ( 0.00    -0.1871)
  
 Spin polar: 2 (Spin_A minus Spin_B electrons)

 CYCLE    6
  SDIIS (wt  0.438):  0.1353 -0.0003  0.1076  0.1687  0.5888
 A-DIIS (wt  0.562):  0.0000  0.0000  0.0000  0.1587  0.8413
  DIIS coefficients:  0.0593 -0.0001  0.0471  0.1631  0.7307
 SCF Error: norm([F,P])=      0.461648852065, max([F,P])=      0.056634672118
 ***** SPIN 1 *****
 orbitals (Q,E):
 ---------------
 A :20...30          ( 1.00    -0.3721)  ( 1.00    -0.3704)  ( 1.00    -0.3684)  ( 1.00    -0.3432)
                     ( 1.00    -0.3327)  ( 1.00    -0.2561)  ( 1.00    -0.2498)  ( 1.00    -0.2372)
                     ( 1.00    -0.2218)  ( 1.00    -0.1047)  ( 0.00    -0.0781)
 ***** SPIN 2 *****
 orbitals (Q,E):
 ---------------
 A :18...28          ( 1.00    -0.3915)  ( 1.00    -0.3874)  ( 1.00    -0.3683)  ( 1.00    -0.3650)
                     ( 1.00    -0.3531)  ( 1.00    -0.3387)  ( 1.00    -0.3126)  ( 1.00    -0.2419)
                     ( 1.00    -0.2389)  ( 1.00    -0.2061)  ( 0.00    -0.2044)
  
 Spin polar: 2 (Spin_A minus Spin_B electrons)

 CYCLE    7
  SDIIS (wt  0.000):  0.0868 -0.0111  0.0720  0.0683  0.5721  0.2118
 A-DIIS (wt  1.000):  0.0000  0.0000  0.0000  0.0000  0.7224  0.2776
  DIIS coefficients:  0.0000  0.0000  0.0000  0.0000  0.7224  0.2776
 SCF Error: norm([F,P])=      0.942116154198, max([F,P])=      0.100640714208
 ***** SPIN 1 *****
 orbitals (Q,E):
 ---------------
 A :20...30          ( 1.00    -0.3809)  ( 1.00    -0.3738)  ( 1.00    -0.3674)  ( 1.00    -0.3530)
                     ( 1.00    -0.3319)  ( 1.00    -0.2531)  ( 1.00    -0.2410)  ( 1.00    -0.2365)
                     ( 1.00    -0.2135)  ( 1.00    -0.1046)  ( 0.00    -0.0763)
 ***** SPIN 2 *****
 orbitals (Q,E):
 ---------------
 A :18...28          ( 1.00    -0.3914)  ( 1.00    -0.3866)  ( 1.00    -0.3762)  ( 1.00    -0.3613)
                     ( 1.00    -0.3575)  ( 1.00    -0.3475)  ( 1.00    -0.3113)  ( 1.00    -0.2351)
                     ( 1.00    -0.2208)  ( 1.00    -0.2125)  ( 0.00    -0.2008)
  
 Spin polar: 2 (Spin_A minus Spin_B electrons)

 CYCLE    8
  SDIIS (wt  0.000):  0.0297  0.0008  0.0588 -0.0438  0.4755  0.2093  0.2697
 A-DIIS (wt  1.000):  0.0000  0.0000  0.0000  0.0000  0.6581  0.2268  0.1151
  DIIS coefficients:  0.0000  0.0000  0.0000  0.0000  0.6581  0.2268  0.1151
 SCF Error: norm([F,P])=      0.655224238319, max([F,P])=      0.054869931149
 ***** SPIN 1 *****
 orbitals (Q,E):
 ---------------
 A :20...30          ( 1.00    -0.3774)  ( 1.00    -0.3687)  ( 1.00    -0.3679)  ( 1.00    -0.3462)
                     ( 1.00    -0.3257)  ( 1.00    -0.2555)  ( 1.00    -0.2480)  ( 1.00    -0.2309)
                     ( 1.00    -0.2284)  ( 1.00    -0.0938)  ( 0.00    -0.0795)
 ***** SPIN 2 *****
 orbitals (Q,E):
 ---------------
 A :18...28          ( 1.00    -0.3828)  ( 1.00    -0.3827)  ( 1.00    -0.3718)  ( 1.00    -0.3633)
                     ( 1.00    -0.3535)  ( 1.00    -0.3423)  ( 1.00    -0.3056)  ( 1.00    -0.2403)
                     ( 1.00    -0.2314)  ( 1.00    -0.2096)  ( 0.00    -0.2038)
  
 Spin polar: 2 (Spin_A minus Spin_B electrons)

 CYCLE    9
  SDIIS (wt  0.838): -0.0202  0.0017 -0.0076 -0.0220  0.2971  0.0483  0.2166  0.4860
 A-DIIS (wt  0.162):  0.0000  0.0000  0.0000  0.0000  0.1797  0.0000  0.1598  0.6606
  DIIS coefficients: -0.0170  0.0014 -0.0063 -0.0185  0.2781  0.0405  0.2075  0.5143
 SCF Error: norm([F,P])=      0.197748853872, max([F,P])=      0.016999958334
 ***** SPIN 1 *****
 orbitals (Q,E):
 ---------------
 A :20...30          ( 1.00    -0.3760)  ( 1.00    -0.3656)  ( 1.00    -0.3640)  ( 1.00    -0.3465)
                     ( 1.00    -0.3235)  ( 1.00    -0.2484)  ( 1.00    -0.2410)  ( 1.00    -0.2310)
                     ( 1.00    -0.2213)  ( 1.00    -0.0909)  ( 0.00    -0.0756)
 ***** SPIN 2 *****
 orbitals (Q,E):
 ---------------
 A :18...28          ( 1.00    -0.3818)  ( 1.00    -0.3797)  ( 1.00    -0.3708)  ( 1.00    -0.3601)
                     ( 1.00    -0.3512)  ( 1.00    -0.3428)  ( 1.00    -0.3012)  ( 1.00    -0.2326)
                     ( 1.00    -0.2291)  ( 1.00    -0.2093)  ( 0.00    -0.2010)
  
 Spin polar: 2 (Spin_A minus Spin_B electrons)

 CYCLE   10
  SDIIS (wt  0.854): -0.0250  0.0002 -0.0171 -0.0007  0.0912  0.0016  0.1239  0.3983  0.4275
 A-DIIS (wt  0.146):  0.0000  0.0000  0.0000  0.0000  0.0000  0.0000  0.0504  0.3022  0.6474
  DIIS coefficients: -0.0213  0.0002 -0.0146 -0.0006  0.0779  0.0014  0.1132  0.3842  0.4597
 SCF Error: norm([F,P])=      0.141246013479, max([F,P])=      0.015480332676
 ***** SPIN 1 *****
 orbitals (Q,E):
 ---------------
 A :20...30          ( 1.00    -0.3735)  ( 1.00    -0.3655)  ( 1.00    -0.3652)  ( 1.00    -0.3456)
                     ( 1.00    -0.3251)  ( 1.00    -0.2506)  ( 1.00    -0.2340)  ( 1.00    -0.2327)
                     ( 1.00    -0.2147)  ( 1.00    -0.0943)  ( 0.00    -0.0758)
 ***** SPIN 2 *****
 orbitals (Q,E):
 ---------------
 A :18...28          ( 1.00    -0.3821)  ( 1.00    -0.3778)  ( 1.00    -0.3693)  ( 1.00    -0.3597)
                     ( 1.00    -0.3524)  ( 1.00    -0.3420)  ( 1.00    -0.3011)  ( 1.00    -0.2351)
                     ( 1.00    -0.2263)  ( 1.00    -0.2067)  ( 0.00    -0.1991)
  
 Spin polar: 2 (Spin_A minus Spin_B electrons)

 CYCLE   11
  SDIIS (wt  0.968): -0.0020 -0.0003  0.0009  0.0039 -0.0814  0.0065  0.0003  0.0238  0.3194  0.7289
 A-DIIS (wt  0.032):  0.0000  0.0000  0.0000  0.0000  0.0000  0.0000  0.0000  0.0000  0.0183  0.9817
  DIIS coefficients: -0.0020 -0.0003  0.0008  0.0038 -0.0788  0.0063  0.0003  0.0230  0.3098  0.7370
 SCF Error: norm([F,P])=      0.050578328250, max([F,P])=      0.004158411151
 ***** SPIN 1 *****
 orbitals (Q,E):
 ---------------
 A :20...30          ( 1.00    -0.3721)  ( 1.00    -0.3653)  ( 1.00    -0.3648)  ( 1.00    -0.3444)
                     ( 1.00    -0.3269)  ( 1.00    -0.2494)  ( 1.00    -0.2356)  ( 1.00    -0.2321)
                     ( 1.00    -0.2121)  ( 1.00    -0.0954)  ( 0.00    -0.0770)
 ***** SPIN 2 *****
 orbitals (Q,E):
 ---------------
 A :18...28          ( 1.00    -0.3816)  ( 1.00    -0.3778)  ( 1.00    -0.3687)  ( 1.00    -0.3602)
                     ( 1.00    -0.3522)  ( 1.00    -0.3411)  ( 1.00    -0.3019)  ( 1.00    -0.2339)
                     ( 1.00    -0.2275)  ( 1.00    -0.2074)  ( 0.00    -0.1986)
  
 Spin polar: 2 (Spin_A minus Spin_B electrons)

 CYCLE   12
  SDIIS (wt  0.990): -0.0001  0.0014  0.0020 -0.0432  0.0014 -0.0010 -0.0459  0.1022  0.3956  0.5875
 A-DIIS (wt  0.010):  0.0000  0.0000  0.0000  0.0000  0.0000  0.0000  0.0000  0.0000  0.1245  0.8755
  DIIS coefficients: -0.0001  0.0014  0.0020 -0.0427  0.0014 -0.0010 -0.0454  0.1011  0.3928  0.5904
 SCF Error: norm([F,P])=      0.021552772759, max([F,P])=      0.001994984715
 ***** SPIN 1 *****
 orbitals (Q,E):
 ---------------
 A :20...30          ( 1.00    -0.3729)  ( 1.00    -0.3662)  ( 1.00    -0.3647)  ( 1.00    -0.3454)
                     ( 1.00    -0.3272)  ( 1.00    -0.2494)  ( 1.00    -0.2361)  ( 1.00    -0.2321)
                     ( 1.00    -0.2120)  ( 1.00    -0.0963)  ( 0.00    -0.0768)
 ***** SPIN 2 *****
 orbitals (Q,E):
 ---------------
 A :18...28          ( 1.00    -0.3826)  ( 1.00    -0.3788)  ( 1.00    -0.3696)  ( 1.00    -0.3610)
                     ( 1.00    -0.3523)  ( 1.00    -0.3421)  ( 1.00    -0.3016)  ( 1.00    -0.2340)
                     ( 1.00    -0.2280)  ( 1.00    -0.2080)  ( 0.00    -0.1988)
  
 Spin polar: 2 (Spin_A minus Spin_B electrons)

 CYCLE   13
  SDIIS (wt  0.995):  0.0003 -0.0002 -0.0133  0.0017  0.0004 -0.0352 -0.0069  0.1055  0.4558  0.4920
 A-DIIS (wt  0.005):  0.0000  0.0000  0.0000  0.0000  0.0000  0.0000  0.0000  0.0000  0.2355  0.7645
  DIIS coefficients:  0.0003 -0.0002 -0.0133  0.0017  0.0004 -0.0350 -0.0069  0.1050  0.4548  0.4933
 SCF Error: norm([F,P])=      0.013340588041, max([F,P])=      0.001472039767
 ***** SPIN 1 *****
 orbitals (Q,E):
 ---------------
 A :20...30          ( 1.00    -0.3726)  ( 1.00    -0.3657)  ( 1.00    -0.3650)  ( 1.00    -0.3452)
                     ( 1.00    -0.3271)  ( 1.00    -0.2494)  ( 1.00    -0.2359)  ( 1.00    -0.2317)
                     ( 1.00    -0.2116)  ( 1.00    -0.0961)  ( 0.00    -0.0766)
 ***** SPIN 2 *****
 orbitals (Q,E):
 ---------------
 A :18...28          ( 1.00    -0.3822)  ( 1.00    -0.3783)  ( 1.00    -0.3693)  ( 1.00    -0.3607)
                     ( 1.00    -0.3525)  ( 1.00    -0.3419)  ( 1.00    -0.3015)  ( 1.00    -0.2340)
                     ( 1.00    -0.2278)  ( 1.00    -0.2079)  ( 0.00    -0.1984)
  
 Spin polar: 2 (Spin_A minus Spin_B electrons)

 CYCLE   14
  SDIIS (wt  1.000):  0.0002 -0.0028  0.0008 -0.0015 -0.0049 -0.0305 -0.0176  0.2035  0.3287  0.5241
  DIIS coefficients:  0.0002 -0.0028  0.0008 -0.0015 -0.0049 -0.0305 -0.0176  0.2035  0.3287  0.5241
 SCF Error: norm([F,P])=      0.008439177992, max([F,P])=      0.000767825460
 ***** SPIN 1 *****
 orbitals (Q,E):
 ---------------
 A :20...30          ( 1.00    -0.3724)  ( 1.00    -0.3656)  ( 1.00    -0.3646)  ( 1.00    -0.3450)
                     ( 1.00    -0.3270)  ( 1.00    -0.2491)  ( 1.00    -0.2359)  ( 1.00    -0.2314)
                     ( 1.00    -0.2112)  ( 1.00    -0.0961)  ( 0.00    -0.0764)
 ***** SPIN 2 *****
 orbitals (Q,E):
 ---------------
 A :18...28          ( 1.00    -0.3822)  ( 1.00    -0.3782)  ( 1.00    -0.3691)  ( 1.00    -0.3606)
                     ( 1.00    -0.3521)  ( 1.00    -0.3417)  ( 1.00    -0.3014)  ( 1.00    -0.2337)
                     ( 1.00    -0.2276)  ( 1.00    -0.2077)  ( 0.00    -0.1982)
  
 Spin polar: 2 (Spin_A minus Spin_B electrons)

 CYCLE   15
  SDIIS (wt  1.000):  0.0018  0.0003 -0.0009  0.0143 -0.0211 -0.0481  0.0262  0.0843  0.1750  0.7683
  DIIS coefficients:  0.0018  0.0003 -0.0009  0.0143 -0.0211 -0.0481  0.0262  0.0843  0.1750  0.7683
 SCF Error: norm([F,P])=      0.004365120346, max([F,P])=      0.000463866254
 ***** SPIN 1 *****
 orbitals (Q,E):
 ---------------
 A :20...30          ( 1.00    -0.3724)  ( 1.00    -0.3657)  ( 1.00    -0.3647)  ( 1.00    -0.3450)
                     ( 1.00    -0.3271)  ( 1.00    -0.2492)  ( 1.00    -0.2360)  ( 1.00    -0.2315)
                     ( 1.00    -0.2112)  ( 1.00    -0.0962)  ( 0.00    -0.0766)
 ***** SPIN 2 *****
 orbitals (Q,E):
 ---------------
 A :18...28          ( 1.00    -0.3822)  ( 1.00    -0.3783)  ( 1.00    -0.3691)  ( 1.00    -0.3607)
                     ( 1.00    -0.3522)  ( 1.00    -0.3417)  ( 1.00    -0.3015)  ( 1.00    -0.2338)
                     ( 1.00    -0.2277)  ( 1.00    -0.2077)  ( 0.00    -0.1982)
  
 Spin polar: 2 (Spin_A minus Spin_B electrons)

 CYCLE   16
  SDIIS (wt  1.000): -0.0000 -0.0005  0.0070 -0.0016 -0.0081  0.0118  0.0046 -0.0820  0.3812  0.6876
  DIIS coefficients: -0.0000 -0.0005  0.0070 -0.0016 -0.0081  0.0118  0.0046 -0.0820  0.3812  0.6876
 SCF Error: norm([F,P])=      0.001517411949, max([F,P])=      0.000125991516
 ***** SPIN 1 *****
 orbitals (Q,E):
 ---------------
 A :20...30          ( 1.00    -0.3724)  ( 1.00    -0.3657)  ( 1.00    -0.3647)  ( 1.00    -0.3450)
                     ( 1.00    -0.3271)  ( 1.00    -0.2493)  ( 1.00    -0.2360)  ( 1.00    -0.2315)
                     ( 1.00    -0.2113)  ( 1.00    -0.0962)  ( 0.00    -0.0766)
 ***** SPIN 2 *****
 orbitals (Q,E):
 ---------------
 A :18...28          ( 1.00    -0.3823)  ( 1.00    -0.3784)  ( 1.00    -0.3691)  ( 1.00    -0.3607)
                     ( 1.00    -0.3522)  ( 1.00    -0.3417)  ( 1.00    -0.3015)  ( 1.00    -0.2339)
                     ( 1.00    -0.2277)  ( 1.00    -0.2078)  ( 0.00    -0.1982)
  
 Spin polar: 2 (Spin_A minus Spin_B electrons)

 CYCLE   17
  SDIIS (wt  1.000): -0.0004  0.0015  0.0062  0.0060 -0.0118 -0.0359 -0.1808 -0.0093  0.4452  0.7793
  DIIS coefficients: -0.0004  0.0015  0.0062  0.0060 -0.0118 -0.0359 -0.1808 -0.0093  0.4452  0.7793
 SCF Error: norm([F,P])=      0.001196955930, max([F,P])=      0.000137798562
 ***** SPIN 1 *****
 orbitals (Q,E):
 ---------------
 A :20...30          ( 1.00    -0.3724)  ( 1.00    -0.3657)  ( 1.00    -0.3647)  ( 1.00    -0.3450)
                     ( 1.00    -0.3271)  ( 1.00    -0.2492)  ( 1.00    -0.2360)  ( 1.00    -0.2315)
                     ( 1.00    -0.2113)  ( 1.00    -0.0962)  ( 0.00    -0.0765)
 ***** SPIN 2 *****
 orbitals (Q,E):
 ---------------
 A :18...28          ( 1.00    -0.3822)  ( 1.00    -0.3783)  ( 1.00    -0.3691)  ( 1.00    -0.3607)
                     ( 1.00    -0.3521)  ( 1.00    -0.3416)  ( 1.00    -0.3015)  ( 1.00    -0.2338)
                     ( 1.00    -0.2277)  ( 1.00    -0.2077)  ( 0.00    -0.1981)
  
 Spin polar: 2 (Spin_A minus Spin_B electrons)

 CYCLE   18
  SDIIS (wt  1.000): -0.0005  0.0053  0.0066 -0.0128 -0.0277 -0.1176 -0.1306  0.0623  0.4544  0.7605
  DIIS coefficients: -0.0005  0.0053  0.0066 -0.0128 -0.0277 -0.1176 -0.1306  0.0623  0.4544  0.7605
 SCF Error: norm([F,P])=      0.000558475084, max([F,P])=      0.000047706326
 ***** SPIN 1 *****
 orbitals (Q,E):
 ---------------
 A :20...30          ( 1.00    -0.3724)  ( 1.00    -0.3657)  ( 1.00    -0.3647)  ( 1.00    -0.3450)
                     ( 1.00    -0.3271)  ( 1.00    -0.2492)  ( 1.00    -0.2360)  ( 1.00    -0.2315)
                     ( 1.00    -0.2113)  ( 1.00    -0.0962)  ( 0.00    -0.0765)
 ***** SPIN 2 *****
 orbitals (Q,E):
 ---------------
 A :18...28          ( 1.00    -0.3822)  ( 1.00    -0.3784)  ( 1.00    -0.3691)  ( 1.00    -0.3607)
                     ( 1.00    -0.3521)  ( 1.00    -0.3416)  ( 1.00    -0.3015)  ( 1.00    -0.2338)
                     ( 1.00    -0.2277)  ( 1.00    -0.2077)  ( 0.00    -0.1981)
  
 Spin polar: 2 (Spin_A minus Spin_B electrons)

 CYCLE   19
  SDIIS (wt  1.000):  0.0014  0.0015 -0.0048 -0.0075 -0.0442 -0.0449 -0.0064  0.1552  0.4713  0.4783
  DIIS coefficients:  0.0014  0.0015 -0.0048 -0.0075 -0.0442 -0.0449 -0.0064  0.1552  0.4713  0.4783
 SCF Error: norm([F,P])=      0.000220401056, max([F,P])=      0.000022416832
 ***** SPIN 1 *****
 orbitals (Q,E):
 ---------------
 A :20...30          ( 1.00    -0.3724)  ( 1.00    -0.3657)  ( 1.00    -0.3647)  ( 1.00    -0.3450)
                     ( 1.00    -0.3271)  ( 1.00    -0.2492)  ( 1.00    -0.2360)  ( 1.00    -0.2315)
                     ( 1.00    -0.2113)  ( 1.00    -0.0962)  ( 0.00    -0.0765)
 ***** SPIN 2 *****
 orbitals (Q,E):
 ---------------
 A :18...28          ( 1.00    -0.3822)  ( 1.00    -0.3784)  ( 1.00    -0.3691)  ( 1.00    -0.3607)
                     ( 1.00    -0.3521)  ( 1.00    -0.3416)  ( 1.00    -0.3015)  ( 1.00    -0.2338)
                     ( 1.00    -0.2277)  ( 1.00    -0.2077)  ( 0.00    -0.1981)
  
 Spin polar: 2 (Spin_A minus Spin_B electrons)

 CYCLE   20
  SDIIS (wt  1.000):  0.0000 -0.0012 -0.0004 -0.0036 -0.0001 -0.0203 -0.0052  0.0370  0.2223  0.7715
  DIIS coefficients:  0.0000 -0.0012 -0.0004 -0.0036 -0.0001 -0.0203 -0.0052  0.0370  0.2223  0.7715
 SCF Error: norm([F,P])=      0.000070076548, max([F,P])=      0.000005961742
 ***** SPIN 1 *****
 orbitals (Q,E):
 ---------------
 A :20...30          ( 1.00    -0.3724)  ( 1.00    -0.3657)  ( 1.00    -0.3647)  ( 1.00    -0.3450)
                     ( 1.00    -0.3271)  ( 1.00    -0.2492)  ( 1.00    -0.2360)  ( 1.00    -0.2315)
                     ( 1.00    -0.2113)  ( 1.00    -0.0962)  ( 0.00    -0.0765)
 ***** SPIN 2 *****
 orbitals (Q,E):
 ---------------
 A :18...28          ( 1.00    -0.3822)  ( 1.00    -0.3784)  ( 1.00    -0.3691)  ( 1.00    -0.3607)
                     ( 1.00    -0.3521)  ( 1.00    -0.3416)  ( 1.00    -0.3015)  ( 1.00    -0.2338)
                     ( 1.00    -0.2277)  ( 1.00    -0.2077)  ( 0.00    -0.1981)
  
 Spin polar: 2 (Spin_A minus Spin_B electrons)

 CYCLE   21
  SDIIS (wt  1.000): -0.0003  0.0003  0.0020  0.0027 -0.0117 -0.0135 -0.0298  0.0362  0.2330  0.7810
  DIIS coefficients: -0.0003  0.0003  0.0020  0.0027 -0.0117 -0.0135 -0.0298  0.0362  0.2330  0.7810
 SCF Error: norm([F,P])=      0.000024314687, max([F,P])=      0.000003082987
 ***** SPIN 1 *****
 orbitals (Q,E):
 ---------------
 A :20...30          ( 1.00    -0.3724)  ( 1.00    -0.3657)  ( 1.00    -0.3647)  ( 1.00    -0.3450)
                     ( 1.00    -0.3271)  ( 1.00    -0.2492)  ( 1.00    -0.2360)  ( 1.00    -0.2315)
                     ( 1.00    -0.2113)  ( 1.00    -0.0962)  ( 0.00    -0.0765)
 ***** SPIN 2 *****
 orbitals (Q,E):
 ---------------
 A :18...28          ( 1.00    -0.3822)  ( 1.00    -0.3784)  ( 1.00    -0.3691)  ( 1.00    -0.3607)
                     ( 1.00    -0.3521)  ( 1.00    -0.3416)  ( 1.00    -0.3015)  ( 1.00    -0.2338)
                     ( 1.00    -0.2277)  ( 1.00    -0.2077)  ( 0.00    -0.1981)
  
 Spin polar: 2 (Spin_A minus Spin_B electrons)

 CYCLE   22
  SDIIS (wt  1.000):  0.0003  0.0023  0.0031 -0.0040 -0.0085 -0.0317 -0.0115  0.0471  0.4882  0.5147
  DIIS coefficients:  0.0003  0.0023  0.0031 -0.0040 -0.0085 -0.0317 -0.0115  0.0471  0.4882  0.5147
 SCF Error: norm([F,P])=      0.000018039052, max([F,P])=      0.000001297366
 ***** SPIN 1 *****
 orbitals (Q,E):
 ---------------
 A :20...30          ( 1.00    -0.3724)  ( 1.00    -0.3657)  ( 1.00    -0.3647)  ( 1.00    -0.3450)
                     ( 1.00    -0.3271)  ( 1.00    -0.2492)  ( 1.00    -0.2360)  ( 1.00    -0.2315)
                     ( 1.00    -0.2113)  ( 1.00    -0.0962)  ( 0.00    -0.0765)
 ***** SPIN 2 *****
 orbitals (Q,E):
 ---------------
 A :18...28          ( 1.00    -0.3822)  ( 1.00    -0.3784)  ( 1.00    -0.3691)  ( 1.00    -0.3607)
                     ( 1.00    -0.3521)  ( 1.00    -0.3416)  ( 1.00    -0.3015)  ( 1.00    -0.2338)
                     ( 1.00    -0.2277)  ( 1.00    -0.2077)  ( 0.00    -0.1981)
  
 Spin polar: 2 (Spin_A minus Spin_B electrons)

 CYCLE   23
  SDIIS (wt  1.000):  0.0008  0.0009  0.0007  0.0009 -0.0058 -0.0204 -0.0546  0.0581  0.2729  0.7465
  DIIS coefficients:  0.0008  0.0009  0.0007  0.0009 -0.0058 -0.0204 -0.0546  0.0581  0.2729  0.7465
 SCF Error: norm([F,P])=      0.000007534460, max([F,P])=      0.000000692000
 ***** SPIN 1 *****
 orbitals (Q,E):
 ---------------
 A :20...30          ( 1.00    -0.3724)  ( 1.00    -0.3657)  ( 1.00    -0.3647)  ( 1.00    -0.3450)
                     ( 1.00    -0.3271)  ( 1.00    -0.2492)  ( 1.00    -0.2360)  ( 1.00    -0.2315)
                     ( 1.00    -0.2113)  ( 1.00    -0.0962)  ( 0.00    -0.0765)
 ***** SPIN 2 *****
 orbitals (Q,E):
 ---------------
 A :18...28          ( 1.00    -0.3822)  ( 1.00    -0.3784)  ( 1.00    -0.3691)  ( 1.00    -0.3607)
                     ( 1.00    -0.3521)  ( 1.00    -0.3416)  ( 1.00    -0.3015)  ( 1.00    -0.2338)
                     ( 1.00    -0.2277)  ( 1.00    -0.2077)  ( 0.00    -0.1981)
  
 Spin polar: 2 (Spin_A minus Spin_B electrons)

 CYCLE   24
  SDIIS (wt  1.000):  0.0002  0.0009  0.0022  0.0013 -0.0064 -0.0276  0.0061  0.1276  0.5358  0.3599
  DIIS coefficients:  0.0002  0.0009  0.0022  0.0013 -0.0064 -0.0276  0.0061  0.1276  0.5358  0.3599
 SCF Error: norm([F,P])=      0.000005081300, max([F,P])=      0.000000522110
 ***** SPIN 1 *****
 orbitals (Q,E):
 ---------------
 A :20...30          ( 1.00    -0.3724)  ( 1.00    -0.3657)  ( 1.00    -0.3647)  ( 1.00    -0.3450)
                     ( 1.00    -0.3271)  ( 1.00    -0.2492)  ( 1.00    -0.2360)  ( 1.00    -0.2315)
                     ( 1.00    -0.2113)  ( 1.00    -0.0962)  ( 0.00    -0.0765)
 ***** SPIN 2 *****
 orbitals (Q,E):
 ---------------
 A :18...28          ( 1.00    -0.3822)  ( 1.00    -0.3784)  ( 1.00    -0.3691)  ( 1.00    -0.3607)
                     ( 1.00    -0.3521)  ( 1.00    -0.3416)  ( 1.00    -0.3015)  ( 1.00    -0.2338)
                     ( 1.00    -0.2277)  ( 1.00    -0.2077)  ( 0.00    -0.1981)
  
 Spin polar: 2 (Spin_A minus Spin_B electrons)

 CYCLE   25
  SDIIS (wt  1.000):  0.0008  0.0009 -0.0001 -0.0064 -0.0251 -0.0107  0.0468  0.2553  0.1953  0.5433
  DIIS coefficients:  0.0008  0.0009 -0.0001 -0.0064 -0.0251 -0.0107  0.0468  0.2553  0.1953  0.5433
 SCF Error: norm([F,P])=      0.000002306206, max([F,P])=      0.000000174702
 ***** SPIN 1 *****
 orbitals (Q,E):
 ---------------
 A :20...30          ( 1.00    -0.3724)  ( 1.00    -0.3657)  ( 1.00    -0.3647)  ( 1.00    -0.3450)
                     ( 1.00    -0.3271)  ( 1.00    -0.2492)  ( 1.00    -0.2360)  ( 1.00    -0.2315)
                     ( 1.00    -0.2113)  ( 1.00    -0.0962)  ( 0.00    -0.0765)
 ***** SPIN 2 *****
 orbitals (Q,E):
 ---------------
 A :18...28          ( 1.00    -0.3822)  ( 1.00    -0.3784)  ( 1.00    -0.3691)  ( 1.00    -0.3607)
                     ( 1.00    -0.3521)  ( 1.00    -0.3416)  ( 1.00    -0.3015)  ( 1.00    -0.2338)
                     ( 1.00    -0.2277)  ( 1.00    -0.2077)  ( 0.00    -0.1981)
  
 Spin polar: 2 (Spin_A minus Spin_B electrons)

 CYCLE   26
  SDIIS (wt  1.000): -0.0002 -0.0005 -0.0010 -0.0035  0.0077  0.0132  0.0493  0.0663  0.3345  0.5342
  DIIS coefficients: -0.0002 -0.0005 -0.0010 -0.0035  0.0077  0.0132  0.0493  0.0663  0.3345  0.5342
 SCF Error: norm([F,P])=      0.000001070143, max([F,P])=      0.000000106907
 ***** SPIN 1 *****
 orbitals (Q,E):
 ---------------
 A :20...30          ( 1.00    -0.3724)  ( 1.00    -0.3657)  ( 1.00    -0.3647)  ( 1.00    -0.3450)
                     ( 1.00    -0.3271)  ( 1.00    -0.2492)  ( 1.00    -0.2360)  ( 1.00    -0.2315)
                     ( 1.00    -0.2113)  ( 1.00    -0.0962)  ( 0.00    -0.0765)
 ***** SPIN 2 *****
 orbitals (Q,E):
 ---------------
 A :18...28          ( 1.00    -0.3822)  ( 1.00    -0.3784)  ( 1.00    -0.3691)  ( 1.00    -0.3607)
                     ( 1.00    -0.3521)  ( 1.00    -0.3416)  ( 1.00    -0.3015)  ( 1.00    -0.2338)
                     ( 1.00    -0.2277)  ( 1.00    -0.2077)  ( 0.00    -0.1981)
  
 Spin polar: 2 (Spin_A minus Spin_B electrons)

 CYCLE   27
  SDIIS (wt  1.000): -0.0001 -0.0005 -0.0019 -0.0006  0.0018  0.0212  0.0281  0.1688  0.2624  0.5208
  DIIS coefficients: -0.0001 -0.0005 -0.0019 -0.0006  0.0018  0.0212  0.0281  0.1688  0.2624  0.5208
 SCF Error: norm([F,P])=      0.000000515744, max([F,P])=      0.000000046473
 ***** SPIN 1 *****
 orbitals (Q,E):
 ---------------
 A :20...30          ( 1.00    -0.3724)  ( 1.00    -0.3657)  ( 1.00    -0.3647)  ( 1.00    -0.3450)
                     ( 1.00    -0.3271)  ( 1.00    -0.2492)  ( 1.00    -0.2360)  ( 1.00    -0.2315)
                     ( 1.00    -0.2113)  ( 1.00    -0.0962)  ( 0.00    -0.0765)
 ***** SPIN 2 *****
 orbitals (Q,E):
 ---------------
 A :18...28          ( 1.00    -0.3822)  ( 1.00    -0.3784)  ( 1.00    -0.3691)  ( 1.00    -0.3607)
                     ( 1.00    -0.3521)  ( 1.00    -0.3416)  ( 1.00    -0.3015)  ( 1.00    -0.2338)
                     ( 1.00    -0.2277)  ( 1.00    -0.2077)  ( 0.00    -0.1981)
  
 Spin polar: 2 (Spin_A minus Spin_B electrons)

 CYCLE   28
  SDIIS (wt  1.000):  0.0001  0.0005 -0.0022 -0.0055 -0.0097 -0.0004  0.0365  0.0729  0.2452  0.6625
  DIIS coefficients:  0.0001  0.0005 -0.0022 -0.0055 -0.0097 -0.0004  0.0365  0.0729  0.2452  0.6625
 SCF Error: norm([F,P])=      0.000000214911, max([F,P])=      0.000000017728
 ***** SPIN 1 *****
 orbitals (Q,E):
 ---------------
 A :20...30          ( 1.00    -0.3724)  ( 1.00    -0.3657)  ( 1.00    -0.3647)  ( 1.00    -0.3450)
                     ( 1.00    -0.3271)  ( 1.00    -0.2492)  ( 1.00    -0.2360)  ( 1.00    -0.2315)
                     ( 1.00    -0.2113)  ( 1.00    -0.0962)  ( 0.00    -0.0765)
 ***** SPIN 2 *****
 orbitals (Q,E):
 ---------------
 A :18...28          ( 1.00    -0.3822)  ( 1.00    -0.3784)  ( 1.00    -0.3691)  ( 1.00    -0.3607)
                     ( 1.00    -0.3521)  ( 1.00    -0.3416)  ( 1.00    -0.3015)  ( 1.00    -0.2338)
                     ( 1.00    -0.2277)  ( 1.00    -0.2077)  ( 0.00    -0.1981)
  
 Spin polar: 2 (Spin_A minus Spin_B electrons)

 CYCLE   29
  SDIIS (wt  1.000):  0.0001 -0.0005 -0.0027 -0.0056 -0.0013  0.0195  0.0325  0.0871  0.2993  0.5715
  DIIS coefficients:  0.0001 -0.0005 -0.0027 -0.0056 -0.0013  0.0195  0.0325  0.0871  0.2993  0.5715
 SCF Error: norm([F,P])=      0.000000059289, max([F,P])=      0.000000006072
 ***** SPIN 1 *****
 orbitals (Q,E):
 ---------------
 A :20...30          ( 1.00    -0.3724)  ( 1.00    -0.3657)  ( 1.00    -0.3647)  ( 1.00    -0.3450)
                     ( 1.00    -0.3271)  ( 1.00    -0.2492)  ( 1.00    -0.2360)  ( 1.00    -0.2315)
                     ( 1.00    -0.2113)  ( 1.00    -0.0962)  ( 0.00    -0.0765)
 ***** SPIN 2 *****
 orbitals (Q,E):
 ---------------
 A :18...28          ( 1.00    -0.3822)  ( 1.00    -0.3784)  ( 1.00    -0.3691)  ( 1.00    -0.3607)
                     ( 1.00    -0.3521)  ( 1.00    -0.3416)  ( 1.00    -0.3015)  ( 1.00    -0.2338)
                     ( 1.00    -0.2277)  ( 1.00    -0.2077)  ( 0.00    -0.1981)
  
 Spin polar: 2 (Spin_A minus Spin_B electrons)

 SCF CONVERGED

 CYCLE   30
 *** Setting up for NEW gradients in Focky
 *** Using FIT density in Focky
 ***** SPIN 1 *****
 orbitals (Q,E):
 ---------------
 A :20...39          ( 1.00    -0.3724)  ( 1.00    -0.3657)  ( 1.00    -0.3647)  ( 1.00    -0.3450)
                     ( 1.00    -0.3271)  ( 1.00    -0.2492)  ( 1.00    -0.2360)  ( 1.00    -0.2315)
                     ( 1.00    -0.2113)  ( 1.00    -0.0962)  ( 0.00    -0.0765)  ( 0.00    -0.0337)
                     ( 0.00    -0.0040)  ( 0.00     0.0054)  ( 0.00     0.0315)  ( 0.00     0.0361)
                     ( 0.00     0.0578)  ( 0.00     0.0648)  ( 0.00     0.0652)  ( 0.00     0.0766)
 ***** SPIN 2 *****
 orbitals (Q,E):
 ---------------
 A :18...37          ( 1.00    -0.3822)  ( 1.00    -0.3784)  ( 1.00    -0.3691)  ( 1.00    -0.3607)
                     ( 1.00    -0.3521)  ( 1.00    -0.3416)  ( 1.00    -0.3015)  ( 1.00    -0.2338)
                     ( 1.00    -0.2277)  ( 1.00    -0.2077)  ( 0.00    -0.1981)  ( 0.00    -0.0628)
                     ( 0.00    -0.0533)  ( 0.00    -0.0306)  ( 0.00    -0.0005)  ( 0.00     0.0077)
                     ( 0.00     0.0391)  ( 0.00     0.0491)  ( 0.00     0.0621)  ( 0.00     0.0694)
  
 Spin polar: 2 (Spin_A minus Spin_B electrons)


 Fit test: (difference of exact and fit density, squared integrated, result summed over spins)
         SCF:                                          0.00001686825270

 Gross Charges per Atom (Z minus electrons)
 ==========================================
            -0.1250    0.0175   -0.0813   -0.0355   -0.6198    0.0167    0.6148    0.0510    0.2730    0.1462
             0.3900   -0.1685   -0.1249   -0.1873   -0.1670
 Net Total: -0.00000000


 =================================================================
 M U L T I P O L E   D E R I V E D   C H A R G E   A N A L Y S I S
 =================================================================

 See: M. Swart, P.Th. van Duijnen, J.G. Snijders, J.Comput.Chem., (2001), p. 79-88.

 ----------------------------------------------------- 
 MDC atomic charges (includes spinA + spinB electrons)
 ----------------------------------------------------- 

        Atom    Level:     MDC-m        MDC-d        MDC-q
 ---------------------------------------------------------
     1     H           -0.039432    -0.012711     6.909761
     2     H            0.060226     0.132134    -5.118753
     3     N           -0.086740    -0.013389   -21.567839
     4     N           -0.039017    -0.004055  -206.246464
     5     O           -0.418963    -0.532883     6.751225
     6     H            0.063829     0.132248    48.384731
     7     C            0.220081     0.333464    22.595122
     8     C            0.034636     0.045038  -110.893700
     9     C            0.085825     0.105296   246.502566
    10     C           -0.279775    -0.107132    73.167032
    11     C            0.221330     0.173188    -5.350275
    12     H           -0.059553    -0.044757   -59.372786
    13     H           -0.039418    -0.012573     6.937445
    14     H           -0.060223    -0.050343    -2.022744
    15     S            0.337193    -0.143526    -0.675320

 -------------------------------- 
 MDC spin density (spinA - spinB)
 -------------------------------- 

        Atom    Level:     MDC-m        MDC-d        MDC-q
 ---------------------------------------------------------
     1     H            0.035489     0.041295    -4.222695
     2     H            0.008808     0.016288     0.236046
     3     N            0.110922     0.096974     1.694006
     4     N            0.221676     0.212111    40.133113
     5     O            0.068811     0.067193     0.090010
     6     H            0.006467     0.010544    -8.017625
     7     C            0.065210     0.080521    -9.076156
     8     C            0.520715     0.468836    44.889253
     9     C            0.444362     0.429869   -71.558571
    10     C            0.118349     0.086763    -9.148309
    11     C            0.019631     0.026087     2.223102
    12     H            0.034111     0.065568    18.722479
    13     H            0.035472     0.041003    -4.225439
    14     H            0.002798     0.006420     0.023370
    15     S            0.307178     0.350526     0.237417


 ==========
 S**2 value  ***  see also R. Bulo et al., J.Am.Chem.Soc., 124 (2002) 13903-13910, note (29)  ***
 ==========
  
                                       exact      expectation value

 Total S2 (S squared)                  2.00000             2.00500
 *** Using NEW gradient routines ***


 Geometry CYCLE 1
 ==============

 Energy gradients wrt nuclear displacements
 ==========================================

     Atom      Cartesian (a.u./angstrom)
                 X         Y         Z
 ----------------------------------------
     1 H     0.001790  0.002556 -0.013044
     2 H     0.003394 -0.028931 -0.004306
     3 N    -0.025975 -0.047917 -0.007070
     4 N     0.131151  0.034510  0.005214
     5 O     0.033794  0.046982  0.006953
     6 H     0.003293  0.030407  0.004420
     7 C     0.088936 -0.040525 -0.006052
     8 C     0.083869  0.160419  0.023696
     9 C    -0.175434 -0.154242 -0.022839
    10 C     0.397376 -0.101399 -0.014929
    11 C    -0.018320  0.002840  0.000324
    12 H    -0.016230 -0.006606 -0.001001
    13 H     0.001782 -0.001385  0.013386
    14 H    -0.008226  0.014867  0.002214
    15 S    -0.501201  0.088424  0.013033
 ----------------------------------------
 
----------------------------------------------------------------------
Geometry Convergence after Step   1       (Hartree/Angstrom,Angstrom)
----------------------------------------------------------------------
current energy                               -3.29791531 Hartree
energy change                      -3.29791531     0.00100000    F
constrained gradient max            0.50120052     0.00100000    F
constrained gradient rms            0.11091329     0.00066667    F
gradient max                        0.50120052
gradient rms                        0.11091329
cart. step max                      0.27604845     0.01000000    F
cart. step rms                      0.07125791     0.00666667    F
 


 Coordinates (Cartesian)
 =======================

     Atom                    bohr                                 angstrom                 Geometric Variables
                   X           Y           Z              X           Y           Z       (0:frozen, *:LT par.)
 --------------------------------------------------------------------------------------------------------------
     1 H      -5.181334    0.191125   -1.686410      -2.741844    0.101139   -0.892410      1       2       3
     2 H       2.585430   -4.378273   -0.638489       1.368150   -2.316882   -0.337874      4       5       6
     3 N       1.944532   -2.592933   -0.374281       1.029002   -1.372121   -0.198061      7       8       9
     4 N       2.821568    1.720732    0.264370       1.493110    0.910572    0.139898     10      11      12
     5 O      -2.168609   -4.097614   -0.603284      -1.147578   -2.168364   -0.319244     13      14      15
     6 H       4.111994    3.123035    0.473198       2.175973    1.652639    0.250405     16      17      18
     7 C      -0.684436   -2.265948   -0.328653      -0.362188   -1.199088   -0.173916     19      20      21
     8 C      -1.531047    0.329608    0.048572      -0.810195    0.174421    0.025703     22      23      24
     9 C       0.315897    2.356501    0.354212       0.167166    1.247007    0.187441     25      26      27
    10 C       3.847061   -0.696891   -0.095224       2.035777   -0.368779   -0.050390     28      29      30
    11 C      -4.303269    0.804202    0.101918      -2.277192    0.425565    0.053932     31      32      33
    12 H      -0.171763    4.330960    0.645225      -0.090893    2.291845    0.341438     34      35      36
    13 H      -5.201915   -0.295921    1.627376      -2.752735   -0.156595    0.861171     37      38      39
    14 H      -4.709999    2.820593    0.395424      -2.492424    1.492594    0.209249     40      41      42
    15 S       7.068801   -1.273908   -0.193507       3.740648   -0.674123   -0.102399     43      44      45
 --------------------------------------------------------------------------------------------------------------

 Number of elements of the density matrix on this node (used, total):      4029     58311


 ===========================================
 Numerical Integration : Fuzzy Cells (Becke)
 ===========================================
  
 Becke grid quality: GOOD           
  
 Lebedev angular grid order:             min:  11 max:  31
 Nr. of radial points:                   min:  54 max:  69

 Total nr. of points:     188989
 Nr. of blocks:             1477
 Block length:               128
 Nr. of dummy points:         67


 Test of Precision of the Numerical Integration Grid
 ===================================================

 Integral of the Total Core Density:                  17.99999135874999
 Relative Error:                                      -4.801E-07


 ========================
 Density Fitting (zlmFit)
 ========================
  
 ZlmFit Fit Quality: GOOD           
  
 Max L-expansion:                        min:   8 max:   9
 Nr. of radial interpolation points:     min:  78 max: 108


 =====
 S C F  ***  ScaSCF  ***
 =====
  
 Initial density matrix is taken from previous geometry

 CYCLE    1
 SCF Error: norm([F,P])=      0.632284506631, max([F,P])=      0.154865957210
 ***** SPIN 1 *****
 orbitals (Q,E):
 ---------------
 A :20...39          ( 1.00    -0.3834)  ( 1.00    -0.3722)  ( 1.00    -0.3706)  ( 1.00    -0.3494)
                     ( 1.00    -0.3295)  ( 1.00    -0.2721)  ( 1.00    -0.2646)  ( 1.00    -0.2454)
                     ( 1.00    -0.2304)  ( 1.00    -0.1362)  ( 0.00    -0.1027)  ( 0.00    -0.0463)
                     ( 0.00    -0.0229)  ( 0.00    -0.0074)  ( 0.00    -0.0036)  ( 0.00     0.0144)
                     ( 0.00     0.0314)  ( 0.00     0.0535)  ( 0.00     0.0595)  ( 0.00     0.0621)
 ***** SPIN 2 *****
 orbitals (Q,E):
 ---------------
 A :18...37          ( 1.00    -0.3999)  ( 1.00    -0.3848)  ( 1.00    -0.3804)  ( 1.00    -0.3678)
                     ( 1.00    -0.3576)  ( 1.00    -0.3463)  ( 1.00    -0.3066)  ( 1.00    -0.2604)
                     ( 1.00    -0.2558)  ( 1.00    -0.2273)  ( 0.00    -0.2079)  ( 0.00    -0.1059)
                     ( 0.00    -0.0729)  ( 0.00    -0.0433)  ( 0.00    -0.0170)  ( 0.00    -0.0037)
                     ( 0.00    -0.0010)  ( 0.00     0.0348)  ( 0.00     0.0382)  ( 0.00     0.0573)
  
 Spin polar: 2 (Spin_A minus Spin_B electrons)

 CYCLE    2
  SDIIS (wt  0.000):  0.3975  0.6025
 A-DIIS (wt  1.000):  0.6150  0.3850
  DIIS coefficients:  0.6150  0.3850
 SCF Error: norm([F,P])=      0.504866839887, max([F,P])=      0.050601421219
 ***** SPIN 1 *****
 orbitals (Q,E):
 ---------------
 A :20...30          ( 1.00    -0.4060)  ( 1.00    -0.3907)  ( 1.00    -0.3764)  ( 1.00    -0.3415)
                     ( 1.00    -0.3197)  ( 1.00    -0.2776)  ( 1.00    -0.2730)  ( 1.00    -0.2156)
                     ( 1.00    -0.1943)  ( 1.00    -0.1438)  ( 0.00    -0.0873)
 ***** SPIN 2 *****
 orbitals (Q,E):
 ---------------
 A :18...28          ( 1.00    -0.4118)  ( 1.00    -0.4003)  ( 1.00    -0.3956)  ( 1.00    -0.3775)
                     ( 1.00    -0.3739)  ( 1.00    -0.3345)  ( 1.00    -0.2964)  ( 1.00    -0.2693)
                     ( 1.00    -0.2475)  ( 1.00    -0.1914)  ( 0.00    -0.1906)
  
 Spin polar: 2 (Spin_A minus Spin_B electrons)

 CYCLE    3
  SDIIS (wt  0.000):  0.1146  0.5676  0.3178
 A-DIIS (wt  1.000):  0.0000  0.6606  0.3394
  DIIS coefficients:  0.0000  0.6606  0.3394
 SCF Error: norm([F,P])=      0.834084538381, max([F,P])=      0.072054206008
 ***** SPIN 1 *****
 orbitals (Q,E):
 ---------------
 A :20...30          ( 1.00    -0.3722)  ( 1.00    -0.3606)  ( 1.00    -0.3544)  ( 1.00    -0.3438)
                     ( 1.00    -0.2989)  ( 1.00    -0.2460)  ( 1.00    -0.2456)  ( 1.00    -0.2318)
                     ( 1.00    -0.2168)  ( 1.00    -0.1060)  ( 0.00    -0.0727)
 ***** SPIN 2 *****
 orbitals (Q,E):
 ---------------
 A :18...28          ( 1.00    -0.3842)  ( 1.00    -0.3708)  ( 1.00    -0.3654)  ( 1.00    -0.3491)
                     ( 1.00    -0.3490)  ( 1.00    -0.3408)  ( 1.00    -0.2793)  ( 1.00    -0.2391)
                     ( 1.00    -0.2259)  ( 1.00    -0.2117)  ( 0.00    -0.1891)
  
 Spin polar: 2 (Spin_A minus Spin_B electrons)

 CYCLE    4
  SDIIS (wt  0.618):  0.4779  0.1908  0.3313
 A-DIIS (wt  0.382):  0.4423  0.1532  0.4045
  DIIS coefficients:  0.4643  0.1765  0.3592
 SCF Error: norm([F,P])=      0.413456914052, max([F,P])=      0.038797196335
 ***** SPIN 1 *****
 orbitals (Q,E):
 ---------------
 A :20...30          ( 1.00    -0.3839)  ( 1.00    -0.3683)  ( 1.00    -0.3632)  ( 1.00    -0.3519)
                     ( 1.00    -0.3151)  ( 1.00    -0.2507)  ( 1.00    -0.2326)  ( 1.00    -0.2245)
                     ( 1.00    -0.2168)  ( 1.00    -0.1248)  ( 0.00    -0.0930)
 ***** SPIN 2 *****
 orbitals (Q,E):
 ---------------
 A :18...28          ( 1.00    -0.3869)  ( 1.00    -0.3834)  ( 1.00    -0.3808)  ( 1.00    -0.3572)
                     ( 1.00    -0.3566)  ( 1.00    -0.3482)  ( 1.00    -0.2932)  ( 1.00    -0.2281)
                     ( 1.00    -0.2272)  ( 1.00    -0.2041)  ( 0.00    -0.1980)
  
 Spin polar: 2 (Spin_A minus Spin_B electrons)

 CYCLE    5
  SDIIS (wt  0.719):  0.2722  0.0299  0.3019  0.3960
 A-DIIS (wt  0.281):  0.2200  0.0000  0.2596  0.5204
  DIIS coefficients:  0.2575  0.0215  0.2900  0.4310
 SCF Error: norm([F,P])=      0.244957132578, max([F,P])=      0.028857404526
 ***** SPIN 1 *****
 orbitals (Q,E):
 ---------------
 A :20...30          ( 1.00    -0.3836)  ( 1.00    -0.3643)  ( 1.00    -0.3632)  ( 1.00    -0.3475)
                     ( 1.00    -0.3113)  ( 1.00    -0.2528)  ( 1.00    -0.2390)  ( 1.00    -0.2326)
                     ( 1.00    -0.2244)  ( 1.00    -0.1175)  ( 0.00    -0.0892)
 ***** SPIN 2 *****
 orbitals (Q,E):
 ---------------
 A :18...28          ( 1.00    -0.3824)  ( 1.00    -0.3796)  ( 1.00    -0.3776)  ( 1.00    -0.3592)
                     ( 1.00    -0.3522)  ( 1.00    -0.3445)  ( 1.00    -0.2893)  ( 1.00    -0.2345)
                     ( 1.00    -0.2319)  ( 1.00    -0.2178)  ( 0.00    -0.1979)
  
 Spin polar: 2 (Spin_A minus Spin_B electrons)

 CYCLE    6
  SDIIS (wt  0.902):  0.0832  0.0125  0.1254  0.2814  0.4974
 A-DIIS (wt  0.098):  0.0000  0.0000  0.0000  0.1985  0.8015
  DIIS coefficients:  0.0751  0.0113  0.1131  0.2733  0.5273
 SCF Error: norm([F,P])=      0.087761057420, max([F,P])=      0.010730731741
 ***** SPIN 1 *****
 orbitals (Q,E):
 ---------------
 A :20...30          ( 1.00    -0.3820)  ( 1.00    -0.3637)  ( 1.00    -0.3633)  ( 1.00    -0.3479)
                     ( 1.00    -0.3120)  ( 1.00    -0.2504)  ( 1.00    -0.2344)  ( 1.00    -0.2325)
                     ( 1.00    -0.2204)  ( 1.00    -0.1199)  ( 0.00    -0.0894)
 ***** SPIN 2 *****
 orbitals (Q,E):
 ---------------
 A :18...28          ( 1.00    -0.3802)  ( 1.00    -0.3801)  ( 1.00    -0.3768)  ( 1.00    -0.3580)
                     ( 1.00    -0.3531)  ( 1.00    -0.3449)  ( 1.00    -0.2896)  ( 1.00    -0.2301)
                     ( 1.00    -0.2296)  ( 1.00    -0.2149)  ( 0.00    -0.1978)
  
 Spin polar: 2 (Spin_A minus Spin_B electrons)

 CYCLE    7
  SDIIS (wt  0.961): -0.0094  0.0076  0.0090  0.1132  0.4565  0.4232
 A-DIIS (wt  0.039):  0.0000  0.0000  0.0000  0.0000  0.1640  0.8360
  DIIS coefficients: -0.0091  0.0073  0.0086  0.1087  0.4450  0.4395
 SCF Error: norm([F,P])=      0.047475325368, max([F,P])=      0.004897955505
 ***** SPIN 1 *****
 orbitals (Q,E):
 ---------------
 A :20...30          ( 1.00    -0.3833)  ( 1.00    -0.3644)  ( 1.00    -0.3636)  ( 1.00    -0.3486)
                     ( 1.00    -0.3124)  ( 1.00    -0.2518)  ( 1.00    -0.2368)  ( 1.00    -0.2322)
                     ( 1.00    -0.2209)  ( 1.00    -0.1197)  ( 0.00    -0.0903)
 ***** SPIN 2 *****
 orbitals (Q,E):
 ---------------
 A :18...28          ( 1.00    -0.3823)  ( 1.00    -0.3807)  ( 1.00    -0.3768)  ( 1.00    -0.3583)
                     ( 1.00    -0.3542)  ( 1.00    -0.3455)  ( 1.00    -0.2903)  ( 1.00    -0.2330)
                     ( 1.00    -0.2305)  ( 1.00    -0.2156)  ( 0.00    -0.1970)
  
 Spin polar: 2 (Spin_A minus Spin_B electrons)

 CYCLE    8
  SDIIS (wt  0.989): -0.0167  0.0031 -0.0111  0.0377  0.2336  0.3378  0.4156
 A-DIIS (wt  0.011):  0.0000  0.0000  0.0000  0.0000  0.0000  0.1856  0.8144
  DIIS coefficients: -0.0165  0.0031 -0.0110  0.0373  0.2310  0.3361  0.4200
 SCF Error: norm([F,P])=      0.019453793062, max([F,P])=      0.002104524548
 ***** SPIN 1 *****
 orbitals (Q,E):
 ---------------
 A :20...30          ( 1.00    -0.3834)  ( 1.00    -0.3638)  ( 1.00    -0.3637)  ( 1.00    -0.3485)
                     ( 1.00    -0.3121)  ( 1.00    -0.2513)  ( 1.00    -0.2360)  ( 1.00    -0.2329)
                     ( 1.00    -0.2209)  ( 1.00    -0.1198)  ( 0.00    -0.0895)
 ***** SPIN 2 *****
 orbitals (Q,E):
 ---------------
 A :18...28          ( 1.00    -0.3817)  ( 1.00    -0.3807)  ( 1.00    -0.3774)  ( 1.00    -0.3585)
                     ( 1.00    -0.3536)  ( 1.00    -0.3454)  ( 1.00    -0.2898)  ( 1.00    -0.2322)
                     ( 1.00    -0.2302)  ( 1.00    -0.2159)  ( 0.00    -0.1973)
  
 Spin polar: 2 (Spin_A minus Spin_B electrons)

 CYCLE    9
  SDIIS (wt  1.000): -0.0035 -0.0001 -0.0064 -0.0069 -0.0145  0.0710  0.2438  0.7166
  DIIS coefficients: -0.0035 -0.0001 -0.0064 -0.0069 -0.0145  0.0710  0.2438  0.7166
 SCF Error: norm([F,P])=      0.005425597806, max([F,P])=      0.000560696056
 ***** SPIN 1 *****
 orbitals (Q,E):
 ---------------
 A :20...30          ( 1.00    -0.3833)  ( 1.00    -0.3640)  ( 1.00    -0.3638)  ( 1.00    -0.3484)
                     ( 1.00    -0.3123)  ( 1.00    -0.2515)  ( 1.00    -0.2360)  ( 1.00    -0.2330)
                     ( 1.00    -0.2208)  ( 1.00    -0.1200)  ( 0.00    -0.0897)
 ***** SPIN 2 *****
 orbitals (Q,E):
 ---------------
 A :18...28          ( 1.00    -0.3818)  ( 1.00    -0.3806)  ( 1.00    -0.3772)  ( 1.00    -0.3585)
                     ( 1.00    -0.3540)  ( 1.00    -0.3454)  ( 1.00    -0.2901)  ( 1.00    -0.2324)
                     ( 1.00    -0.2303)  ( 1.00    -0.2160)  ( 0.00    -0.1972)
  
 Spin polar: 2 (Spin_A minus Spin_B electrons)

 CYCLE   10
  SDIIS (wt  1.000):  0.0002 -0.0001 -0.0025 -0.0102 -0.0342  0.0052  0.0795  0.4084  0.5537
  DIIS coefficients:  0.0002 -0.0001 -0.0025 -0.0102 -0.0342  0.0052  0.0795  0.4084  0.5537
 SCF Error: norm([F,P])=      0.002352694579, max([F,P])=      0.000230810976
 ***** SPIN 1 *****
 orbitals (Q,E):
 ---------------
 A :20...30          ( 1.00    -0.3833)  ( 1.00    -0.3638)  ( 1.00    -0.3637)  ( 1.00    -0.3484)
                     ( 1.00    -0.3122)  ( 1.00    -0.2514)  ( 1.00    -0.2359)  ( 1.00    -0.2329)
                     ( 1.00    -0.2207)  ( 1.00    -0.1200)  ( 0.00    -0.0896)
 ***** SPIN 2 *****
 orbitals (Q,E):
 ---------------
 A :18...28          ( 1.00    -0.3817)  ( 1.00    -0.3806)  ( 1.00    -0.3772)  ( 1.00    -0.3584)
                     ( 1.00    -0.3538)  ( 1.00    -0.3454)  ( 1.00    -0.2899)  ( 1.00    -0.2323)
                     ( 1.00    -0.2301)  ( 1.00    -0.2159)  ( 0.00    -0.1971)
  
 Spin polar: 2 (Spin_A minus Spin_B electrons)

 CYCLE   11
  SDIIS (wt  1.000):  0.0013 -0.0002 -0.0005 -0.0063 -0.0163 -0.0067 -0.0064  0.1094  0.4047  0.5210
  DIIS coefficients:  0.0013 -0.0002 -0.0005 -0.0063 -0.0163 -0.0067 -0.0064  0.1094  0.4047  0.5210
 SCF Error: norm([F,P])=      0.001946296856, max([F,P])=      0.000202066541
 ***** SPIN 1 *****
 orbitals (Q,E):
 ---------------
 A :20...30          ( 1.00    -0.3832)  ( 1.00    -0.3638)  ( 1.00    -0.3637)  ( 1.00    -0.3484)
                     ( 1.00    -0.3122)  ( 1.00    -0.2514)  ( 1.00    -0.2359)  ( 1.00    -0.2329)
                     ( 1.00    -0.2207)  ( 1.00    -0.1199)  ( 0.00    -0.0895)
 ***** SPIN 2 *****
 orbitals (Q,E):
 ---------------
 A :18...28          ( 1.00    -0.3817)  ( 1.00    -0.3806)  ( 1.00    -0.3772)  ( 1.00    -0.3584)
                     ( 1.00    -0.3538)  ( 1.00    -0.3454)  ( 1.00    -0.2900)  ( 1.00    -0.2323)
                     ( 1.00    -0.2301)  ( 1.00    -0.2160)  ( 0.00    -0.1970)
  
 Spin polar: 2 (Spin_A minus Spin_B electrons)

 CYCLE   12
  SDIIS (wt  1.000): -0.0001 -0.0009 -0.0024  0.0040  0.0058 -0.0105 -0.0076  0.1292  0.2024  0.6801
  DIIS coefficients: -0.0001 -0.0009 -0.0024  0.0040  0.0058 -0.0105 -0.0076  0.1292  0.2024  0.6801
 SCF Error: norm([F,P])=      0.000872494531, max([F,P])=      0.000101765347
 ***** SPIN 1 *****
 orbitals (Q,E):
 ---------------
 A :20...30          ( 1.00    -0.3832)  ( 1.00    -0.3638)  ( 1.00    -0.3637)  ( 1.00    -0.3484)
                     ( 1.00    -0.3122)  ( 1.00    -0.2514)  ( 1.00    -0.2359)  ( 1.00    -0.2330)
                     ( 1.00    -0.2207)  ( 1.00    -0.1199)  ( 0.00    -0.0896)
 ***** SPIN 2 *****
 orbitals (Q,E):
 ---------------
 A :18...28          ( 1.00    -0.3817)  ( 1.00    -0.3806)  ( 1.00    -0.3772)  ( 1.00    -0.3585)
                     ( 1.00    -0.3538)  ( 1.00    -0.3454)  ( 1.00    -0.2900)  ( 1.00    -0.2323)
                     ( 1.00    -0.2302)  ( 1.00    -0.2160)  ( 0.00    -0.1971)
  
 Spin polar: 2 (Spin_A minus Spin_B electrons)

 CYCLE   13
  SDIIS (wt  1.000): -0.0002 -0.0004  0.0055  0.0044 -0.0074 -0.0291 -0.0002  0.0044  0.4621  0.5608
  DIIS coefficients: -0.0002 -0.0004  0.0055  0.0044 -0.0074 -0.0291 -0.0002  0.0044  0.4621  0.5608
 SCF Error: norm([F,P])=      0.000277632529, max([F,P])=      0.000028549355
 ***** SPIN 1 *****
 orbitals (Q,E):
 ---------------
 A :20...30          ( 1.00    -0.3832)  ( 1.00    -0.3638)  ( 1.00    -0.3637)  ( 1.00    -0.3484)
                     ( 1.00    -0.3122)  ( 1.00    -0.2514)  ( 1.00    -0.2359)  ( 1.00    -0.2330)
                     ( 1.00    -0.2208)  ( 1.00    -0.1199)  ( 0.00    -0.0896)
 ***** SPIN 2 *****
 orbitals (Q,E):
 ---------------
 A :18...28          ( 1.00    -0.3817)  ( 1.00    -0.3806)  ( 1.00    -0.3772)  ( 1.00    -0.3585)
                     ( 1.00    -0.3538)  ( 1.00    -0.3454)  ( 1.00    -0.2900)  ( 1.00    -0.2323)
                     ( 1.00    -0.2302)  ( 1.00    -0.2160)  ( 0.00    -0.1971)
  
 Spin polar: 2 (Spin_A minus Spin_B electrons)

 CYCLE   14
  SDIIS (wt  1.000):  0.0001  0.0033  0.0024 -0.0038 -0.0208 -0.0261 -0.0417  0.2212  0.4257  0.4395
  DIIS coefficients:  0.0001  0.0033  0.0024 -0.0038 -0.0208 -0.0261 -0.0417  0.2212  0.4257  0.4395
 SCF Error: norm([F,P])=      0.000162402865, max([F,P])=      0.000015065995
 ***** SPIN 1 *****
 orbitals (Q,E):
 ---------------
 A :20...30          ( 1.00    -0.3832)  ( 1.00    -0.3638)  ( 1.00    -0.3637)  ( 1.00    -0.3484)
                     ( 1.00    -0.3122)  ( 1.00    -0.2514)  ( 1.00    -0.2359)  ( 1.00    -0.2330)
                     ( 1.00    -0.2208)  ( 1.00    -0.1199)  ( 0.00    -0.0896)
 ***** SPIN 2 *****
 orbitals (Q,E):
 ---------------
 A :18...28          ( 1.00    -0.3817)  ( 1.00    -0.3806)  ( 1.00    -0.3772)  ( 1.00    -0.3585)
                     ( 1.00    -0.3538)  ( 1.00    -0.3454)  ( 1.00    -0.2900)  ( 1.00    -0.2323)
                     ( 1.00    -0.2302)  ( 1.00    -0.2160)  ( 0.00    -0.1971)
  
 Spin polar: 2 (Spin_A minus Spin_B electrons)

 CYCLE   15
  SDIIS (wt  1.000):  0.0010  0.0011 -0.0011 -0.0060 -0.0096 -0.0178  0.0681  0.1521  0.1969  0.6154
  DIIS coefficients:  0.0010  0.0011 -0.0011 -0.0060 -0.0096 -0.0178  0.0681  0.1521  0.1969  0.6154
 SCF Error: norm([F,P])=      0.000041911270, max([F,P])=      0.000003721002
 ***** SPIN 1 *****
 orbitals (Q,E):
 ---------------
 A :20...30          ( 1.00    -0.3832)  ( 1.00    -0.3638)  ( 1.00    -0.3637)  ( 1.00    -0.3484)
                     ( 1.00    -0.3122)  ( 1.00    -0.2514)  ( 1.00    -0.2359)  ( 1.00    -0.2330)
                     ( 1.00    -0.2208)  ( 1.00    -0.1199)  ( 0.00    -0.0895)
 ***** SPIN 2 *****
 orbitals (Q,E):
 ---------------
 A :18...28          ( 1.00    -0.3817)  ( 1.00    -0.3806)  ( 1.00    -0.3772)  ( 1.00    -0.3585)
                     ( 1.00    -0.3538)  ( 1.00    -0.3454)  ( 1.00    -0.2900)  ( 1.00    -0.2323)
                     ( 1.00    -0.2302)  ( 1.00    -0.2160)  ( 0.00    -0.1971)
  
 Spin polar: 2 (Spin_A minus Spin_B electrons)

 CYCLE   16
  SDIIS (wt  1.000):  0.0003 -0.0000 -0.0004 -0.0022 -0.0039 -0.0090 -0.0029  0.0046  0.3261  0.6873
  DIIS coefficients:  0.0003 -0.0000 -0.0004 -0.0022 -0.0039 -0.0090 -0.0029  0.0046  0.3261  0.6873
 SCF Error: norm([F,P])=      0.000026005063, max([F,P])=      0.000003177895
 ***** SPIN 1 *****
 orbitals (Q,E):
 ---------------
 A :20...30          ( 1.00    -0.3832)  ( 1.00    -0.3638)  ( 1.00    -0.3637)  ( 1.00    -0.3484)
                     ( 1.00    -0.3122)  ( 1.00    -0.2514)  ( 1.00    -0.2359)  ( 1.00    -0.2330)
                     ( 1.00    -0.2208)  ( 1.00    -0.1199)  ( 0.00    -0.0895)
 ***** SPIN 2 *****
 orbitals (Q,E):
 ---------------
 A :18...28          ( 1.00    -0.3817)  ( 1.00    -0.3806)  ( 1.00    -0.3772)  ( 1.00    -0.3585)
                     ( 1.00    -0.3538)  ( 1.00    -0.3454)  ( 1.00    -0.2900)  ( 1.00    -0.2323)
                     ( 1.00    -0.2302)  ( 1.00    -0.2160)  ( 0.00    -0.1971)
  
 Spin polar: 2 (Spin_A minus Spin_B electrons)

 CYCLE   17
  SDIIS (wt  1.000): -0.0003 -0.0008  0.0005  0.0036 -0.0066 -0.0244 -0.0515 -0.0584  0.3122  0.8258
  DIIS coefficients: -0.0003 -0.0008  0.0005  0.0036 -0.0066 -0.0244 -0.0515 -0.0584  0.3122  0.8258
 SCF Error: norm([F,P])=      0.000012196071, max([F,P])=      0.000001285730
 ***** SPIN 1 *****
 orbitals (Q,E):
 ---------------
 A :20...30          ( 1.00    -0.3832)  ( 1.00    -0.3638)  ( 1.00    -0.3637)  ( 1.00    -0.3484)
                     ( 1.00    -0.3122)  ( 1.00    -0.2514)  ( 1.00    -0.2359)  ( 1.00    -0.2330)
                     ( 1.00    -0.2208)  ( 1.00    -0.1199)  ( 0.00    -0.0895)
 ***** SPIN 2 *****
 orbitals (Q,E):
 ---------------
 A :18...28          ( 1.00    -0.3817)  ( 1.00    -0.3806)  ( 1.00    -0.3772)  ( 1.00    -0.3585)
                     ( 1.00    -0.3538)  ( 1.00    -0.3454)  ( 1.00    -0.2900)  ( 1.00    -0.2323)
                     ( 1.00    -0.2302)  ( 1.00    -0.2160)  ( 0.00    -0.1971)
  
 Spin polar: 2 (Spin_A minus Spin_B electrons)

 CYCLE   18
  SDIIS (wt  1.000):  0.0002  0.0009  0.0031 -0.0019 -0.0138 -0.0335 -0.1114  0.0135  0.4657  0.6772
  DIIS coefficients:  0.0002  0.0009  0.0031 -0.0019 -0.0138 -0.0335 -0.1114  0.0135  0.4657  0.6772
 SCF Error: norm([F,P])=      0.000005412363, max([F,P])=      0.000000421134
 ***** SPIN 1 *****
 orbitals (Q,E):
 ---------------
 A :20...30          ( 1.00    -0.3832)  ( 1.00    -0.3638)  ( 1.00    -0.3637)  ( 1.00    -0.3484)
                     ( 1.00    -0.3122)  ( 1.00    -0.2514)  ( 1.00    -0.2359)  ( 1.00    -0.2330)
                     ( 1.00    -0.2208)  ( 1.00    -0.1199)  ( 0.00    -0.0895)
 ***** SPIN 2 *****
 orbitals (Q,E):
 ---------------
 A :18...28          ( 1.00    -0.3817)  ( 1.00    -0.3806)  ( 1.00    -0.3772)  ( 1.00    -0.3585)
                     ( 1.00    -0.3538)  ( 1.00    -0.3454)  ( 1.00    -0.2900)  ( 1.00    -0.2323)
                     ( 1.00    -0.2302)  ( 1.00    -0.2160)  ( 0.00    -0.1971)
  
 Spin polar: 2 (Spin_A minus Spin_B electrons)

 CYCLE   19
  SDIIS (wt  1.000):  0.0001  0.0010  0.0003 -0.0037 -0.0127 -0.0557 -0.0419  0.0662  0.3025  0.7439
  DIIS coefficients:  0.0001  0.0010  0.0003 -0.0037 -0.0127 -0.0557 -0.0419  0.0662  0.3025  0.7439
 SCF Error: norm([F,P])=      0.000003164413, max([F,P])=      0.000000294178
 ***** SPIN 1 *****
 orbitals (Q,E):
 ---------------
 A :20...30          ( 1.00    -0.3832)  ( 1.00    -0.3638)  ( 1.00    -0.3637)  ( 1.00    -0.3484)
                     ( 1.00    -0.3122)  ( 1.00    -0.2514)  ( 1.00    -0.2359)  ( 1.00    -0.2330)
                     ( 1.00    -0.2208)  ( 1.00    -0.1199)  ( 0.00    -0.0895)
 ***** SPIN 2 *****
 orbitals (Q,E):
 ---------------
 A :18...28          ( 1.00    -0.3817)  ( 1.00    -0.3806)  ( 1.00    -0.3772)  ( 1.00    -0.3585)
                     ( 1.00    -0.3538)  ( 1.00    -0.3454)  ( 1.00    -0.2900)  ( 1.00    -0.2323)
                     ( 1.00    -0.2302)  ( 1.00    -0.2160)  ( 0.00    -0.1971)
  
 Spin polar: 2 (Spin_A minus Spin_B electrons)

 CYCLE   20
  SDIIS (wt  1.000):  0.0001  0.0011  0.0021  0.0009 -0.0093 -0.0331 -0.0833  0.0351  0.3876  0.6986
  DIIS coefficients:  0.0001  0.0011  0.0021  0.0009 -0.0093 -0.0331 -0.0833  0.0351  0.3876  0.6986
 SCF Error: norm([F,P])=      0.000001602318, max([F,P])=      0.000000205323
 ***** SPIN 1 *****
 orbitals (Q,E):
 ---------------
 A :20...30          ( 1.00    -0.3832)  ( 1.00    -0.3638)  ( 1.00    -0.3637)  ( 1.00    -0.3484)
                     ( 1.00    -0.3122)  ( 1.00    -0.2514)  ( 1.00    -0.2359)  ( 1.00    -0.2330)
                     ( 1.00    -0.2208)  ( 1.00    -0.1199)  ( 0.00    -0.0895)
 ***** SPIN 2 *****
 orbitals (Q,E):
 ---------------
 A :18...28          ( 1.00    -0.3817)  ( 1.00    -0.3806)  ( 1.00    -0.3772)  ( 1.00    -0.3585)
                     ( 1.00    -0.3538)  ( 1.00    -0.3454)  ( 1.00    -0.2900)  ( 1.00    -0.2323)
                     ( 1.00    -0.2302)  ( 1.00    -0.2160)  ( 0.00    -0.1971)
  
 Spin polar: 2 (Spin_A minus Spin_B electrons)

 CYCLE   21
  SDIIS (wt  1.000):  0.0006  0.0018  0.0023  0.0029 -0.0127 -0.0591 -0.0159  0.1158  0.4313  0.5330
  DIIS coefficients:  0.0006  0.0018  0.0023  0.0029 -0.0127 -0.0591 -0.0159  0.1158  0.4313  0.5330
 SCF Error: norm([F,P])=      0.000000653305, max([F,P])=      0.000000060466
 ***** SPIN 1 *****
 orbitals (Q,E):
 ---------------
 A :20...30          ( 1.00    -0.3832)  ( 1.00    -0.3638)  ( 1.00    -0.3637)  ( 1.00    -0.3484)
                     ( 1.00    -0.3122)  ( 1.00    -0.2514)  ( 1.00    -0.2359)  ( 1.00    -0.2330)
                     ( 1.00    -0.2208)  ( 1.00    -0.1199)  ( 0.00    -0.0895)
 ***** SPIN 2 *****
 orbitals (Q,E):
 ---------------
 A :18...28          ( 1.00    -0.3817)  ( 1.00    -0.3806)  ( 1.00    -0.3772)  ( 1.00    -0.3585)
                     ( 1.00    -0.3538)  ( 1.00    -0.3454)  ( 1.00    -0.2900)  ( 1.00    -0.2323)
                     ( 1.00    -0.2302)  ( 1.00    -0.2160)  ( 0.00    -0.1971)
  
 Spin polar: 2 (Spin_A minus Spin_B electrons)

 CYCLE   22
  SDIIS (wt  1.000):  0.0005  0.0007  0.0055  0.0048 -0.0147 -0.0160 -0.0295  0.1030  0.3739  0.5717
  DIIS coefficients:  0.0005  0.0007  0.0055  0.0048 -0.0147 -0.0160 -0.0295  0.1030  0.3739  0.5717
 SCF Error: norm([F,P])=      0.000000382234, max([F,P])=      0.000000044302
 ***** SPIN 1 *****
 orbitals (Q,E):
 ---------------
 A :20...30          ( 1.00    -0.3832)  ( 1.00    -0.3638)  ( 1.00    -0.3637)  ( 1.00    -0.3484)
                     ( 1.00    -0.3122)  ( 1.00    -0.2514)  ( 1.00    -0.2359)  ( 1.00    -0.2330)
                     ( 1.00    -0.2208)  ( 1.00    -0.1199)  ( 0.00    -0.0895)
 ***** SPIN 2 *****
 orbitals (Q,E):
 ---------------
 A :18...28          ( 1.00    -0.3817)  ( 1.00    -0.3806)  ( 1.00    -0.3772)  ( 1.00    -0.3585)
                     ( 1.00    -0.3538)  ( 1.00    -0.3454)  ( 1.00    -0.2900)  ( 1.00    -0.2323)
                     ( 1.00    -0.2302)  ( 1.00    -0.2160)  ( 0.00    -0.1971)
  
 Spin polar: 2 (Spin_A minus Spin_B electrons)

 CYCLE   23
  SDIIS (wt  1.000):  0.0002  0.0024  0.0034 -0.0020 -0.0109 -0.0514 -0.0426  0.1009  0.2709  0.7292
  DIIS coefficients:  0.0002  0.0024  0.0034 -0.0020 -0.0109 -0.0514 -0.0426  0.1009  0.2709  0.7292
 SCF Error: norm([F,P])=      0.000000208023, max([F,P])=      0.000000024099
 ***** SPIN 1 *****
 orbitals (Q,E):
 ---------------
 A :20...30          ( 1.00    -0.3832)  ( 1.00    -0.3638)  ( 1.00    -0.3637)  ( 1.00    -0.3484)
                     ( 1.00    -0.3122)  ( 1.00    -0.2514)  ( 1.00    -0.2359)  ( 1.00    -0.2330)
                     ( 1.00    -0.2208)  ( 1.00    -0.1199)  ( 0.00    -0.0895)
 ***** SPIN 2 *****
 orbitals (Q,E):
 ---------------
 A :18...28          ( 1.00    -0.3817)  ( 1.00    -0.3806)  ( 1.00    -0.3772)  ( 1.00    -0.3585)
                     ( 1.00    -0.3538)  ( 1.00    -0.3454)  ( 1.00    -0.2900)  ( 1.00    -0.2323)
                     ( 1.00    -0.2302)  ( 1.00    -0.2160)  ( 0.00    -0.1971)
  
 Spin polar: 2 (Spin_A minus Spin_B electrons)

 CYCLE   24
  SDIIS (wt  1.000):  0.0009  0.0015  0.0007 -0.0027 -0.0276 -0.0275  0.0520  0.1490  0.4946  0.3591
  DIIS coefficients:  0.0009  0.0015  0.0007 -0.0027 -0.0276 -0.0275  0.0520  0.1490  0.4946  0.3591
 SCF Error: norm([F,P])=      0.000000126214, max([F,P])=      0.000000010251
 ***** SPIN 1 *****
 orbitals (Q,E):
 ---------------
 A :20...30          ( 1.00    -0.3832)  ( 1.00    -0.3638)  ( 1.00    -0.3637)  ( 1.00    -0.3484)
                     ( 1.00    -0.3122)  ( 1.00    -0.2514)  ( 1.00    -0.2359)  ( 1.00    -0.2330)
                     ( 1.00    -0.2208)  ( 1.00    -0.1199)  ( 0.00    -0.0895)
 ***** SPIN 2 *****
 orbitals (Q,E):
 ---------------
 A :18...28          ( 1.00    -0.3817)  ( 1.00    -0.3806)  ( 1.00    -0.3772)  ( 1.00    -0.3585)
                     ( 1.00    -0.3538)  ( 1.00    -0.3454)  ( 1.00    -0.2900)  ( 1.00    -0.2323)
                     ( 1.00    -0.2302)  ( 1.00    -0.2160)  ( 0.00    -0.1971)
  
 Spin polar: 2 (Spin_A minus Spin_B electrons)

 CYCLE   25
  SDIIS (wt  1.000): -0.0003 -0.0004 -0.0004 -0.0044 -0.0062 -0.0068 -0.0023  0.1899  0.2063  0.6246
  DIIS coefficients: -0.0003 -0.0004 -0.0004 -0.0044 -0.0062 -0.0068 -0.0023  0.1899  0.2063  0.6246
 SCF Error: norm([F,P])=      0.000000040882, max([F,P])=      0.000000004185
 ***** SPIN 1 *****
 orbitals (Q,E):
 ---------------
 A :20...30          ( 1.00    -0.3832)  ( 1.00    -0.3638)  ( 1.00    -0.3637)  ( 1.00    -0.3484)
                     ( 1.00    -0.3122)  ( 1.00    -0.2514)  ( 1.00    -0.2359)  ( 1.00    -0.2330)
                     ( 1.00    -0.2208)  ( 1.00    -0.1199)  ( 0.00    -0.0895)
 ***** SPIN 2 *****
 orbitals (Q,E):
 ---------------
 A :18...28          ( 1.00    -0.3817)  ( 1.00    -0.3806)  ( 1.00    -0.3772)  ( 1.00    -0.3585)
                     ( 1.00    -0.3538)  ( 1.00    -0.3454)  ( 1.00    -0.2900)  ( 1.00    -0.2323)
                     ( 1.00    -0.2302)  ( 1.00    -0.2160)  ( 0.00    -0.1971)
  
 Spin polar: 2 (Spin_A minus Spin_B electrons)

 SCF CONVERGED

 CYCLE   26
 *** Setting up for NEW gradients in Focky
 *** Using FIT density in Focky
 ***** SPIN 1 *****
 orbitals (Q,E):
 ---------------
 A :20...39          ( 1.00    -0.3832)  ( 1.00    -0.3638)  ( 1.00    -0.3637)  ( 1.00    -0.3484)
                     ( 1.00    -0.3122)  ( 1.00    -0.2514)  ( 1.00    -0.2359)  ( 1.00    -0.2330)
                     ( 1.00    -0.2208)  ( 1.00    -0.1199)  ( 0.00    -0.0895)  ( 0.00    -0.0340)
                     ( 0.00    -0.0040)  ( 0.00     0.0052)  ( 0.00     0.0094)  ( 0.00     0.0224)
                     ( 0.00     0.0366)  ( 0.00     0.0581)  ( 0.00     0.0637)  ( 0.00     0.0820)
 ***** SPIN 2 *****
 orbitals (Q,E):
 ---------------
 A :18...37          ( 1.00    -0.3817)  ( 1.00    -0.3806)  ( 1.00    -0.3772)  ( 1.00    -0.3585)
                     ( 1.00    -0.3538)  ( 1.00    -0.3454)  ( 1.00    -0.2900)  ( 1.00    -0.2323)
                     ( 1.00    -0.2302)  ( 1.00    -0.2160)  ( 0.00    -0.1971)  ( 0.00    -0.0821)
                     ( 0.00    -0.0695)  ( 0.00    -0.0315)  ( 0.00    -0.0009)  ( 0.00     0.0105)
                     ( 0.00     0.0142)  ( 0.00     0.0394)  ( 0.00     0.0421)  ( 0.00     0.0613)
  
 Spin polar: 2 (Spin_A minus Spin_B electrons)


 Fit test: (difference of exact and fit density, squared integrated, result summed over spins)
         SCF:                                          0.00001533017474

 Gross Charges per Atom (Z minus electrons)
 ==========================================
            -0.1281    0.0215   -0.0645    0.0616   -0.5977    0.0059    0.6168    0.0294    0.2926   -0.0143
             0.4204   -0.1646   -0.1280   -0.2011   -0.1498
 Net Total:  0.00000000


 =================================================================
 M U L T I P O L E   D E R I V E D   C H A R G E   A N A L Y S I S
 =================================================================

 See: M. Swart, P.Th. van Duijnen, J.G. Snijders, J.Comput.Chem., (2001), p. 79-88.

 ----------------------------------------------------- 
 MDC atomic charges (includes spinA + spinB electrons)
 ----------------------------------------------------- 

        Atom    Level:     MDC-m        MDC-d        MDC-q
 ---------------------------------------------------------
     1     H           -0.041086    -0.010400    -3.510065
     2     H            0.045753     0.128920   -12.763729
     3     N           -0.077467    -0.011527    23.775449
     4     N           -0.006735     0.040315   -17.301597
     5     O           -0.406867    -0.501831    -1.423935
     6     H            0.051130     0.122502     9.460916
     7     C            0.241735     0.328849     6.565409
     8     C            0.024873     0.022518    -3.833804
     9     C            0.104251     0.107184     4.943112
    10     C           -0.160519    -0.176209    -9.721457
    11     C            0.218318     0.170858     2.569745
    12     H           -0.041240    -0.012892    -2.502149
    13     H           -0.041011    -0.011326    -3.543119
    14     H           -0.063955    -0.059870     4.213155
    15     S            0.152820    -0.137090     3.072068

 -------------------------------- 
 MDC spin density (spinA - spinB)
 -------------------------------- 

        Atom    Level:     MDC-m        MDC-d        MDC-q
 ---------------------------------------------------------
     1     H            0.035711     0.042057     1.250093
     2     H            0.008187     0.014781     5.834142
     3     N            0.133924     0.120896    -8.442453
     4     N            0.123687     0.125716    22.363636
     5     O            0.067343     0.065944     0.413347
     6     H            0.003339     0.003399   -10.167567
     7     C            0.042959     0.062134    -1.253494
     8     C            0.502039     0.432584     0.374487
     9     C            0.391667     0.384196    -1.022781
    10     C            0.169125     0.149198   -10.263407
    11     C            0.019117     0.029169     0.733598
    12     H            0.027260     0.053025     1.038119
    13     H            0.035618     0.043287     1.239707
    14     H            0.002147     0.006844    -3.445933
    15     S            0.437878     0.466770     3.348505


 ==========
 S**2 value  ***  see also R. Bulo et al., J.Am.Chem.Soc., 124 (2002) 13903-13910, note (29)  ***
 ==========
  
                                       exact      expectation value

 Total S2 (S squared)                  2.00000             2.00705
 *** Using NEW gradient routines ***


 Geometry CYCLE 2
 ==============

 Energy gradients wrt nuclear displacements
 ==========================================

     Atom      Cartesian (a.u./angstrom)
                 X         Y         Z
 ----------------------------------------
     1 H     0.001977  0.001280 -0.002978
     2 H    -0.001122  0.004951  0.000699
     3 N    -0.046846 -0.008950 -0.001623
     4 N     0.002956  0.033104  0.005170
     5 O    -0.043537 -0.035897 -0.005557
     6 H    -0.009036 -0.000079 -0.000046
     7 C     0.047361 -0.000533  0.000473
     8 C     0.009269  0.025244  0.003680
     9 C    -0.029127  0.013853  0.001912
    10 C     0.022687 -0.017750 -0.002446
    11 C    -0.010612 -0.009590 -0.001487
    12 H    -0.003178  0.002687  0.000280
    13 H     0.001926  0.000354  0.003333
    14 H     0.001176  0.002790  0.000433
    15 S     0.056108 -0.011463 -0.001843
 ----------------------------------------

 dE(predicted):    -0.10297E+00, dE(actual):    -0.72145E-01, Trust radius:    0.774597, all in a.u.
 
----------------------------------------------------------------------
Geometry Convergence after Step   2       (Hartree/Angstrom,Angstrom)
----------------------------------------------------------------------
current energy                               -3.37006017 Hartree
energy change                      -0.07214487     0.00100000    F
constrained gradient max            0.05610789     0.00100000    F
constrained gradient rms            0.01834077     0.00066667    F
gradient max                        0.05610789
gradient rms                        0.01834077
cart. step max                      0.04883936     0.01000000    F
cart. step rms                      0.01999962     0.00666667    F
 


 Coordinates (Cartesian)
 =======================

     Atom                    bohr                                 angstrom                 Geometric Variables
                   X           Y           Z              X           Y           Z       (0:frozen, *:LT par.)
 --------------------------------------------------------------------------------------------------------------
     1 H      -5.176291    0.246254   -1.675989      -2.739175    0.130312   -0.886895      1       2       3
     2 H       2.619856   -4.383284   -0.631553       1.386368   -2.319534   -0.334204      4       5       6
     3 N       1.964790   -2.597692   -0.370009       1.039722   -1.374640   -0.195801      7       8       9
     4 N       2.830642    1.668002    0.258507       1.497911    0.882669    0.136796     10      11      12
     5 O      -2.076316   -4.085032   -0.599254      -1.098739   -2.161706   -0.317111     13      14      15
     6 H       4.163336    3.039171    0.463998       2.203142    1.608260    0.245537     16      17      18
     7 C      -0.671567   -2.258942   -0.328705      -0.355378   -1.195381   -0.173943     19      20      21
     8 C      -1.518496    0.310215    0.045173      -0.803554    0.164159    0.023905     22      23      24
     9 C       0.368058    2.314402    0.353241       0.194768    1.224729    0.186927     25      26      27
    10 C       3.793080   -0.701550   -0.095196       2.007212   -0.371244   -0.050376     28      29      30
    11 C      -4.272706    0.846238    0.101555      -2.261018    0.447810    0.053740     31      32      33
    12 H      -0.079980    4.293222    0.649890      -0.042323    2.271875    0.343907     34      35      36
    13 H      -5.205096   -0.241155    1.612777      -2.754418   -0.127614    0.853445     37      38      39
    14 H      -4.647044    2.864599    0.396913      -2.459110    1.515881    0.210037     40      41      42
    15 S       6.981814   -1.249462   -0.193031       3.694617   -0.661187   -0.102148     43      44      45
 --------------------------------------------------------------------------------------------------------------

 Number of elements of the density matrix on this node (used, total):      4029     58311


 ===========================================
 Numerical Integration : Fuzzy Cells (Becke)
 ===========================================
  
 Becke grid quality: GOOD           
  
 Lebedev angular grid order:             min:  11 max:  31
 Nr. of radial points:                   min:  54 max:  69

 Total nr. of points:     188991
 Nr. of blocks:             1477
 Block length:               128
 Nr. of dummy points:         65


 Test of Precision of the Numerical Integration Grid
 ===================================================

 Integral of the Total Core Density:                  18.00000475270592
 Relative Error:                                       2.640E-07


 ========================
 Density Fitting (zlmFit)
 ========================
  
 ZlmFit Fit Quality: GOOD           
  
 Max L-expansion:                        min:   8 max:   9
 Nr. of radial interpolation points:     min:  78 max: 108


 =====
 S C F  ***  ScaSCF  ***
 =====
  
 Initial density matrix is taken from previous geometry

 CYCLE    1
 SCF Error: norm([F,P])=      0.094068404650, max([F,P])=      0.007726593245
 ***** SPIN 1 *****
 orbitals (Q,E):
 ---------------
 A :20...39          ( 1.00    -0.3772)  ( 1.00    -0.3564)  ( 1.00    -0.3556)  ( 1.00    -0.3421)
                     ( 1.00    -0.3043)  ( 1.00    -0.2418)  ( 1.00    -0.2279)  ( 1.00    -0.2233)
                     ( 1.00    -0.2123)  ( 1.00    -0.1087)  ( 0.00    -0.0690)  ( 0.00    -0.0282)
                     ( 0.00     0.0016)  ( 0.00     0.0155)  ( 0.00     0.0221)  ( 0.00     0.0373)
                     ( 0.00     0.0432)  ( 0.00     0.0637)  ( 0.00     0.0720)  ( 0.00     0.0961)
 ***** SPIN 2 *****
 orbitals (Q,E):
 ---------------
 A :18...37          ( 1.00    -0.3751)  ( 1.00    -0.3739)  ( 1.00    -0.3707)  ( 1.00    -0.3504)
                     ( 1.00    -0.3469)  ( 1.00    -0.3388)  ( 1.00    -0.2817)  ( 1.00    -0.2241)
                     ( 1.00    -0.2204)  ( 1.00    -0.2077)  ( 0.00    -0.1871)  ( 0.00    -0.0702)
                     ( 0.00    -0.0499)  ( 0.00    -0.0257)  ( 0.00     0.0046)  ( 0.00     0.0178)
                     ( 0.00     0.0292)  ( 0.00     0.0459)  ( 0.00     0.0526)  ( 0.00     0.0670)
  
 Spin polar: 2 (Spin_A minus Spin_B electrons)

 CYCLE    2
   MIX coefficients:  0.8000  0.2000
 SCF Error: norm([F,P])=      0.091548278911, max([F,P])=      0.010863831995
 ***** SPIN 1 *****
 orbitals (Q,E):
 ---------------
 A :20...30          ( 1.00    -0.3794)  ( 1.00    -0.3611)  ( 1.00    -0.3580)  ( 1.00    -0.3446)
                     ( 1.00    -0.3081)  ( 1.00    -0.2450)  ( 1.00    -0.2305)  ( 1.00    -0.2252)
                     ( 1.00    -0.2133)  ( 1.00    -0.1122)  ( 0.00    -0.0741)
 ***** SPIN 2 *****
 orbitals (Q,E):
 ---------------
 A :18...28          ( 1.00    -0.3777)  ( 1.00    -0.3770)  ( 1.00    -0.3731)  ( 1.00    -0.3527)
                     ( 1.00    -0.3516)  ( 1.00    -0.3412)  ( 1.00    -0.2862)  ( 1.00    -0.2268)
                     ( 1.00    -0.2232)  ( 1.00    -0.2086)  ( 0.00    -0.1892)
  
 Spin polar: 2 (Spin_A minus Spin_B electrons)

 CYCLE    3
  SDIIS (wt  0.000): -0.2646  1.2646
 A-DIIS (wt  1.000):  0.0000  1.0000
  DIIS coefficients:  0.0000  1.0000
 SCF Error: norm([F,P])=      0.025188696129, max([F,P])=      0.002145347042
 ***** SPIN 1 *****
 orbitals (Q,E):
 ---------------
 A :20...30          ( 1.00    -0.3862)  ( 1.00    -0.3710)  ( 1.00    -0.3654)  ( 1.00    -0.3509)
                     ( 1.00    -0.3169)  ( 1.00    -0.2538)  ( 1.00    -0.2392)  ( 1.00    -0.2321)
                     ( 1.00    -0.2200)  ( 1.00    -0.1199)  ( 0.00    -0.0841)
 ***** SPIN 2 *****
 orbitals (Q,E):
 ---------------
 A :18...28          ( 1.00    -0.3845)  ( 1.00    -0.3843)  ( 1.00    -0.3798)  ( 1.00    -0.3616)
                     ( 1.00    -0.3600)  ( 1.00    -0.3475)  ( 1.00    -0.2959)  ( 1.00    -0.2356)
                     ( 1.00    -0.2316)  ( 1.00    -0.2151)  ( 0.00    -0.1959)
  
 Spin polar: 2 (Spin_A minus Spin_B electrons)

 CYCLE    4
  SDIIS (wt  0.000):  0.1374  0.4755  0.3871
 A-DIIS (wt  1.000):  0.0000  0.7963  0.2037
  DIIS coefficients:  0.0000  0.7963  0.2037
 SCF Error: norm([F,P])=      0.059955375612, max([F,P])=      0.005797901492
 ***** SPIN 1 *****
 orbitals (Q,E):
 ---------------
 A :20...30          ( 1.00    -0.3857)  ( 1.00    -0.3695)  ( 1.00    -0.3643)  ( 1.00    -0.3508)
                     ( 1.00    -0.3155)  ( 1.00    -0.2526)  ( 1.00    -0.2383)  ( 1.00    -0.2316)
                     ( 1.00    -0.2194)  ( 1.00    -0.1191)  ( 0.00    -0.0819)
 ***** SPIN 2 *****
 orbitals (Q,E):
 ---------------
 A :18...28          ( 1.00    -0.3842)  ( 1.00    -0.3836)  ( 1.00    -0.3794)  ( 1.00    -0.3601)
                     ( 1.00    -0.3589)  ( 1.00    -0.3474)  ( 1.00    -0.2940)  ( 1.00    -0.2347)
                     ( 1.00    -0.2304)  ( 1.00    -0.2145)  ( 0.00    -0.1955)
  
 Spin polar: 2 (Spin_A minus Spin_B electrons)

 CYCLE    5
  SDIIS (wt  0.995):  0.1365  0.2563  0.2421  0.3651
 A-DIIS (wt  0.005):  0.0000  0.3572  0.0000  0.6428
  DIIS coefficients:  0.1358  0.2568  0.2408  0.3666
 SCF Error: norm([F,P])=      0.018338317289, max([F,P])=      0.001507176785
 ***** SPIN 1 *****
 orbitals (Q,E):
 ---------------
 A :20...30          ( 1.00    -0.3850)  ( 1.00    -0.3681)  ( 1.00    -0.3638)  ( 1.00    -0.3500)
                     ( 1.00    -0.3148)  ( 1.00    -0.2517)  ( 1.00    -0.2368)  ( 1.00    -0.2311)
                     ( 1.00    -0.2190)  ( 1.00    -0.1186)  ( 0.00    -0.0807)
 ***** SPIN 2 *****
 orbitals (Q,E):
 ---------------
 A :18...28          ( 1.00    -0.3830)  ( 1.00    -0.3828)  ( 1.00    -0.3789)  ( 1.00    -0.3585)
                     ( 1.00    -0.3585)  ( 1.00    -0.3466)  ( 1.00    -0.2932)  ( 1.00    -0.2331)
                     ( 1.00    -0.2296)  ( 1.00    -0.2141)  ( 0.00    -0.1949)
  
 Spin polar: 2 (Spin_A minus Spin_B electrons)

 CYCLE    6
  SDIIS (wt  1.000):  0.1050  0.0563  0.1295  0.2630  0.4462
  DIIS coefficients:  0.1050  0.0563  0.1295  0.2630  0.4462
 SCF Error: norm([F,P])=      0.007229225686, max([F,P])=      0.000717629877
 ***** SPIN 1 *****
 orbitals (Q,E):
 ---------------
 A :20...30          ( 1.00    -0.3850)  ( 1.00    -0.3681)  ( 1.00    -0.3638)  ( 1.00    -0.3501)
                     ( 1.00    -0.3146)  ( 1.00    -0.2517)  ( 1.00    -0.2372)  ( 1.00    -0.2310)
                     ( 1.00    -0.2190)  ( 1.00    -0.1183)  ( 0.00    -0.0807)
 ***** SPIN 2 *****
 orbitals (Q,E):
 ---------------
 A :18...28          ( 1.00    -0.3833)  ( 1.00    -0.3828)  ( 1.00    -0.3787)  ( 1.00    -0.3587)
                     ( 1.00    -0.3584)  ( 1.00    -0.3466)  ( 1.00    -0.2930)  ( 1.00    -0.2335)
                     ( 1.00    -0.2296)  ( 1.00    -0.2141)  ( 0.00    -0.1948)
  
 Spin polar: 2 (Spin_A minus Spin_B electrons)

 CYCLE    7
  SDIIS (wt  1.000):  0.0686 -0.0005  0.0775  0.1359  0.3635  0.3550
  DIIS coefficients:  0.0686 -0.0005  0.0775  0.1359  0.3635  0.3550
 SCF Error: norm([F,P])=      0.004058318060, max([F,P])=      0.000496405927
 ***** SPIN 1 *****
 orbitals (Q,E):
 ---------------
 A :20...30          ( 1.00    -0.3850)  ( 1.00    -0.3681)  ( 1.00    -0.3638)  ( 1.00    -0.3501)
                     ( 1.00    -0.3146)  ( 1.00    -0.2516)  ( 1.00    -0.2370)  ( 1.00    -0.2311)
                     ( 1.00    -0.2190)  ( 1.00    -0.1183)  ( 0.00    -0.0807)
 ***** SPIN 2 *****
 orbitals (Q,E):
 ---------------
 A :18...28          ( 1.00    -0.3832)  ( 1.00    -0.3828)  ( 1.00    -0.3788)  ( 1.00    -0.3586)
                     ( 1.00    -0.3585)  ( 1.00    -0.3466)  ( 1.00    -0.2930)  ( 1.00    -0.2333)
                     ( 1.00    -0.2296)  ( 1.00    -0.2142)  ( 0.00    -0.1948)
  
 Spin polar: 2 (Spin_A minus Spin_B electrons)

 CYCLE    8
  SDIIS (wt  1.000):  0.0232 -0.0121  0.0313  0.0104  0.1559  0.2436  0.5476
  DIIS coefficients:  0.0232 -0.0121  0.0313  0.0104  0.1559  0.2436  0.5476
 SCF Error: norm([F,P])=      0.001407172175, max([F,P])=      0.000111449677
 ***** SPIN 1 *****
 orbitals (Q,E):
 ---------------
 A :20...30          ( 1.00    -0.3851)  ( 1.00    -0.3681)  ( 1.00    -0.3638)  ( 1.00    -0.3501)
                     ( 1.00    -0.3146)  ( 1.00    -0.2517)  ( 1.00    -0.2371)  ( 1.00    -0.2311)
                     ( 1.00    -0.2191)  ( 1.00    -0.1184)  ( 0.00    -0.0807)
 ***** SPIN 2 *****
 orbitals (Q,E):
 ---------------
 A :18...28          ( 1.00    -0.3832)  ( 1.00    -0.3828)  ( 1.00    -0.3788)  ( 1.00    -0.3586)
                     ( 1.00    -0.3585)  ( 1.00    -0.3466)  ( 1.00    -0.2930)  ( 1.00    -0.2334)
                     ( 1.00    -0.2296)  ( 1.00    -0.2142)  ( 0.00    -0.1948)
  
 Spin polar: 2 (Spin_A minus Spin_B electrons)

 CYCLE    9
  SDIIS (wt  1.000): -0.0149 -0.0031 -0.0100 -0.0469 -0.0306  0.0464  0.2795  0.7797
  DIIS coefficients: -0.0149 -0.0031 -0.0100 -0.0469 -0.0306  0.0464  0.2795  0.7797
 SCF Error: norm([F,P])=      0.000526833316, max([F,P])=      0.000066269226
 ***** SPIN 1 *****
 orbitals (Q,E):
 ---------------
 A :20...30          ( 1.00    -0.3850)  ( 1.00    -0.3681)  ( 1.00    -0.3638)  ( 1.00    -0.3500)
                     ( 1.00    -0.3146)  ( 1.00    -0.2517)  ( 1.00    -0.2370)  ( 1.00    -0.2311)
                     ( 1.00    -0.2191)  ( 1.00    -0.1183)  ( 0.00    -0.0806)
 ***** SPIN 2 *****
 orbitals (Q,E):
 ---------------
 A :18...28          ( 1.00    -0.3832)  ( 1.00    -0.3828)  ( 1.00    -0.3788)  ( 1.00    -0.3586)
                     ( 1.00    -0.3585)  ( 1.00    -0.3466)  ( 1.00    -0.2930)  ( 1.00    -0.2333)
                     ( 1.00    -0.2296)  ( 1.00    -0.2142)  ( 0.00    -0.1948)
  
 Spin polar: 2 (Spin_A minus Spin_B electrons)

 CYCLE   10
  SDIIS (wt  1.000): -0.0186  0.0032 -0.0161 -0.0360 -0.0574 -0.0124  0.0606  0.6012  0.4755
  DIIS coefficients: -0.0186  0.0032 -0.0161 -0.0360 -0.0574 -0.0124  0.0606  0.6012  0.4755
 SCF Error: norm([F,P])=      0.000418952158, max([F,P])=      0.000037644326
 ***** SPIN 1 *****
 orbitals (Q,E):
 ---------------
 A :20...30          ( 1.00    -0.3850)  ( 1.00    -0.3681)  ( 1.00    -0.3638)  ( 1.00    -0.3500)
                     ( 1.00    -0.3146)  ( 1.00    -0.2517)  ( 1.00    -0.2370)  ( 1.00    -0.2311)
                     ( 1.00    -0.2190)  ( 1.00    -0.1184)  ( 0.00    -0.0806)
 ***** SPIN 2 *****
 orbitals (Q,E):
 ---------------
 A :18...28          ( 1.00    -0.3832)  ( 1.00    -0.3828)  ( 1.00    -0.3788)  ( 1.00    -0.3586)
                     ( 1.00    -0.3585)  ( 1.00    -0.3466)  ( 1.00    -0.2930)  ( 1.00    -0.2334)
                     ( 1.00    -0.2296)  ( 1.00    -0.2142)  ( 0.00    -0.1948)
  
 Spin polar: 2 (Spin_A minus Spin_B electrons)

 CYCLE   11
  SDIIS (wt  1.000): -0.0070  0.0047 -0.0059 -0.0053 -0.0223 -0.0197 -0.0678  0.1351  0.2546  0.7337
  DIIS coefficients: -0.0070  0.0047 -0.0059 -0.0053 -0.0223 -0.0197 -0.0678  0.1351  0.2546  0.7337
 SCF Error: norm([F,P])=      0.000142743934, max([F,P])=      0.000013133799
 ***** SPIN 1 *****
 orbitals (Q,E):
 ---------------
 A :20...30          ( 1.00    -0.3850)  ( 1.00    -0.3681)  ( 1.00    -0.3638)  ( 1.00    -0.3501)
                     ( 1.00    -0.3146)  ( 1.00    -0.2517)  ( 1.00    -0.2370)  ( 1.00    -0.2311)
                     ( 1.00    -0.2191)  ( 1.00    -0.1184)  ( 0.00    -0.0807)
 ***** SPIN 2 *****
 orbitals (Q,E):
 ---------------
 A :18...28          ( 1.00    -0.3832)  ( 1.00    -0.3828)  ( 1.00    -0.3788)  ( 1.00    -0.3586)
                     ( 1.00    -0.3585)  ( 1.00    -0.3466)  ( 1.00    -0.2930)  ( 1.00    -0.2334)
                     ( 1.00    -0.2296)  ( 1.00    -0.2142)  ( 0.00    -0.1948)
  
 Spin polar: 2 (Spin_A minus Spin_B electrons)

 CYCLE   12
  SDIIS (wt  1.000):  0.0016  0.0002  0.0036  0.0018 -0.0027 -0.0333 -0.0407 -0.0057  0.3190  0.7563
  DIIS coefficients:  0.0016  0.0002  0.0036  0.0018 -0.0027 -0.0333 -0.0407 -0.0057  0.3190  0.7563
 SCF Error: norm([F,P])=      0.000051306912, max([F,P])=      0.000004272774
 ***** SPIN 1 *****
 orbitals (Q,E):
 ---------------
 A :20...30          ( 1.00    -0.3850)  ( 1.00    -0.3681)  ( 1.00    -0.3638)  ( 1.00    -0.3501)
                     ( 1.00    -0.3146)  ( 1.00    -0.2517)  ( 1.00    -0.2371)  ( 1.00    -0.2311)
                     ( 1.00    -0.2190)  ( 1.00    -0.1184)  ( 0.00    -0.0807)
 ***** SPIN 2 *****
 orbitals (Q,E):
 ---------------
 A :18...28          ( 1.00    -0.3832)  ( 1.00    -0.3828)  ( 1.00    -0.3788)  ( 1.00    -0.3586)
                     ( 1.00    -0.3585)  ( 1.00    -0.3466)  ( 1.00    -0.2930)  ( 1.00    -0.2334)
                     ( 1.00    -0.2296)  ( 1.00    -0.2142)  ( 0.00    -0.1948)
  
 Spin polar: 2 (Spin_A minus Spin_B electrons)

 CYCLE   13
  SDIIS (wt  1.000): -0.0002  0.0009  0.0016  0.0019 -0.0007 -0.0292 -0.0508  0.0425  0.4785  0.5554
  DIIS coefficients: -0.0002  0.0009  0.0016  0.0019 -0.0007 -0.0292 -0.0508  0.0425  0.4785  0.5554
 SCF Error: norm([F,P])=      0.000038192309, max([F,P])=      0.000003300675
 ***** SPIN 1 *****
 orbitals (Q,E):
 ---------------
 A :20...30          ( 1.00    -0.3850)  ( 1.00    -0.3681)  ( 1.00    -0.3638)  ( 1.00    -0.3501)
                     ( 1.00    -0.3146)  ( 1.00    -0.2517)  ( 1.00    -0.2371)  ( 1.00    -0.2311)
                     ( 1.00    -0.2190)  ( 1.00    -0.1184)  ( 0.00    -0.0806)
 ***** SPIN 2 *****
 orbitals (Q,E):
 ---------------
 A :18...28          ( 1.00    -0.3832)  ( 1.00    -0.3828)  ( 1.00    -0.3788)  ( 1.00    -0.3586)
                     ( 1.00    -0.3585)  ( 1.00    -0.3466)  ( 1.00    -0.2930)  ( 1.00    -0.2334)
                     ( 1.00    -0.2296)  ( 1.00    -0.2142)  ( 0.00    -0.1948)
  
 Spin polar: 2 (Spin_A minus Spin_B electrons)

 CYCLE   14
  SDIIS (wt  1.000):  0.0002  0.0016  0.0044  0.0115 -0.0027 -0.0303 -0.0462  0.0979  0.2579  0.7057
  DIIS coefficients:  0.0002  0.0016  0.0044  0.0115 -0.0027 -0.0303 -0.0462  0.0979  0.2579  0.7057
 SCF Error: norm([F,P])=      0.000022383018, max([F,P])=      0.000002332555
 ***** SPIN 1 *****
 orbitals (Q,E):
 ---------------
 A :20...30          ( 1.00    -0.3850)  ( 1.00    -0.3681)  ( 1.00    -0.3638)  ( 1.00    -0.3501)
                     ( 1.00    -0.3146)  ( 1.00    -0.2517)  ( 1.00    -0.2371)  ( 1.00    -0.2311)
                     ( 1.00    -0.2190)  ( 1.00    -0.1184)  ( 0.00    -0.0806)
 ***** SPIN 2 *****
 orbitals (Q,E):
 ---------------
 A :18...28          ( 1.00    -0.3832)  ( 1.00    -0.3828)  ( 1.00    -0.3788)  ( 1.00    -0.3586)
                     ( 1.00    -0.3585)  ( 1.00    -0.3466)  ( 1.00    -0.2930)  ( 1.00    -0.2334)
                     ( 1.00    -0.2296)  ( 1.00    -0.2142)  ( 0.00    -0.1948)
  
 Spin polar: 2 (Spin_A minus Spin_B electrons)

 CYCLE   15
  SDIIS (wt  1.000):  0.0003  0.0016  0.0045 -0.0051 -0.0202 -0.0459 -0.0015  0.1133  0.5315  0.4216
  DIIS coefficients:  0.0003  0.0016  0.0045 -0.0051 -0.0202 -0.0459 -0.0015  0.1133  0.5315  0.4216
 SCF Error: norm([F,P])=      0.000018964330, max([F,P])=      0.000002102191
 ***** SPIN 1 *****
 orbitals (Q,E):
 ---------------
 A :20...30          ( 1.00    -0.3850)  ( 1.00    -0.3681)  ( 1.00    -0.3638)  ( 1.00    -0.3501)
                     ( 1.00    -0.3146)  ( 1.00    -0.2517)  ( 1.00    -0.2371)  ( 1.00    -0.2311)
                     ( 1.00    -0.2190)  ( 1.00    -0.1184)  ( 0.00    -0.0807)
 ***** SPIN 2 *****
 orbitals (Q,E):
 ---------------
 A :18...28          ( 1.00    -0.3832)  ( 1.00    -0.3828)  ( 1.00    -0.3788)  ( 1.00    -0.3586)
                     ( 1.00    -0.3585)  ( 1.00    -0.3466)  ( 1.00    -0.2930)  ( 1.00    -0.2334)
                     ( 1.00    -0.2296)  ( 1.00    -0.2142)  ( 0.00    -0.1948)
  
 Spin polar: 2 (Spin_A minus Spin_B electrons)

 CYCLE   16
  SDIIS (wt  1.000):  0.0004  0.0011  0.0005 -0.0033 -0.0167 -0.0305  0.0015  0.1748  0.1931  0.6792
  DIIS coefficients:  0.0004  0.0011  0.0005 -0.0033 -0.0167 -0.0305  0.0015  0.1748  0.1931  0.6792
 SCF Error: norm([F,P])=      0.000002984076, max([F,P])=      0.000000289409
 ***** SPIN 1 *****
 orbitals (Q,E):
 ---------------
 A :20...30          ( 1.00    -0.3850)  ( 1.00    -0.3681)  ( 1.00    -0.3638)  ( 1.00    -0.3501)
                     ( 1.00    -0.3146)  ( 1.00    -0.2517)  ( 1.00    -0.2371)  ( 1.00    -0.2311)
                     ( 1.00    -0.2190)  ( 1.00    -0.1184)  ( 0.00    -0.0807)
 ***** SPIN 2 *****
 orbitals (Q,E):
 ---------------
 A :18...28          ( 1.00    -0.3832)  ( 1.00    -0.3828)  ( 1.00    -0.3788)  ( 1.00    -0.3586)
                     ( 1.00    -0.3585)  ( 1.00    -0.3466)  ( 1.00    -0.2930)  ( 1.00    -0.2334)
                     ( 1.00    -0.2296)  ( 1.00    -0.2142)  ( 0.00    -0.1948)
  
 Spin polar: 2 (Spin_A minus Spin_B electrons)

 CYCLE   17
  SDIIS (wt  1.000):  0.0000  0.0008  0.0007 -0.0006 -0.0047 -0.0045  0.0026  0.0135  0.3012  0.6909
  DIIS coefficients:  0.0000  0.0008  0.0007 -0.0006 -0.0047 -0.0045  0.0026  0.0135  0.3012  0.6909
 SCF Error: norm([F,P])=      0.000001035998, max([F,P])=      0.000000111811
 ***** SPIN 1 *****
 orbitals (Q,E):
 ---------------
 A :20...30          ( 1.00    -0.3850)  ( 1.00    -0.3681)  ( 1.00    -0.3638)  ( 1.00    -0.3501)
                     ( 1.00    -0.3146)  ( 1.00    -0.2517)  ( 1.00    -0.2371)  ( 1.00    -0.2311)
                     ( 1.00    -0.2190)  ( 1.00    -0.1184)  ( 0.00    -0.0807)
 ***** SPIN 2 *****
 orbitals (Q,E):
 ---------------
 A :18...28          ( 1.00    -0.3832)  ( 1.00    -0.3828)  ( 1.00    -0.3788)  ( 1.00    -0.3586)
                     ( 1.00    -0.3585)  ( 1.00    -0.3466)  ( 1.00    -0.2930)  ( 1.00    -0.2334)
                     ( 1.00    -0.2296)  ( 1.00    -0.2142)  ( 0.00    -0.1948)
  
 Spin polar: 2 (Spin_A minus Spin_B electrons)

 CYCLE   18
  SDIIS (wt  1.000):  0.0004  0.0004 -0.0013 -0.0066 -0.0062  0.0069  0.0176  0.1723  0.4793  0.3372
  DIIS coefficients:  0.0004  0.0004 -0.0013 -0.0066 -0.0062  0.0069  0.0176  0.1723  0.4793  0.3372
 SCF Error: norm([F,P])=      0.000001269553, max([F,P])=      0.000000138588
 ***** SPIN 1 *****
 orbitals (Q,E):
 ---------------
 A :20...30          ( 1.00    -0.3850)  ( 1.00    -0.3681)  ( 1.00    -0.3638)  ( 1.00    -0.3501)
                     ( 1.00    -0.3146)  ( 1.00    -0.2517)  ( 1.00    -0.2371)  ( 1.00    -0.2311)
                     ( 1.00    -0.2190)  ( 1.00    -0.1184)  ( 0.00    -0.0807)
 ***** SPIN 2 *****
 orbitals (Q,E):
 ---------------
 A :18...28          ( 1.00    -0.3832)  ( 1.00    -0.3828)  ( 1.00    -0.3788)  ( 1.00    -0.3586)
                     ( 1.00    -0.3585)  ( 1.00    -0.3466)  ( 1.00    -0.2930)  ( 1.00    -0.2334)
                     ( 1.00    -0.2296)  ( 1.00    -0.2142)  ( 0.00    -0.1948)
  
 Spin polar: 2 (Spin_A minus Spin_B electrons)

 CYCLE   19
  SDIIS (wt  1.000):  0.0000 -0.0004 -0.0017 -0.0019  0.0008  0.0042  0.0341  0.2506  0.2500  0.4644
  DIIS coefficients:  0.0000 -0.0004 -0.0017 -0.0019  0.0008  0.0042  0.0341  0.2506  0.2500  0.4644
 SCF Error: norm([F,P])=      0.000000386340, max([F,P])=      0.000000053424
 ***** SPIN 1 *****
 orbitals (Q,E):
 ---------------
 A :20...30          ( 1.00    -0.3850)  ( 1.00    -0.3681)  ( 1.00    -0.3638)  ( 1.00    -0.3501)
                     ( 1.00    -0.3146)  ( 1.00    -0.2517)  ( 1.00    -0.2371)  ( 1.00    -0.2311)
                     ( 1.00    -0.2190)  ( 1.00    -0.1184)  ( 0.00    -0.0807)
 ***** SPIN 2 *****
 orbitals (Q,E):
 ---------------
 A :18...28          ( 1.00    -0.3832)  ( 1.00    -0.3828)  ( 1.00    -0.3788)  ( 1.00    -0.3586)
                     ( 1.00    -0.3585)  ( 1.00    -0.3466)  ( 1.00    -0.2930)  ( 1.00    -0.2334)
                     ( 1.00    -0.2296)  ( 1.00    -0.2142)  ( 0.00    -0.1948)
  
 Spin polar: 2 (Spin_A minus Spin_B electrons)

 CYCLE   20
  SDIIS (wt  1.000):  0.0001  0.0002 -0.0008 -0.0041 -0.0003 -0.0109  0.0524  0.0902  0.2721  0.6011
  DIIS coefficients:  0.0001  0.0002 -0.0008 -0.0041 -0.0003 -0.0109  0.0524  0.0902  0.2721  0.6011
 SCF Error: norm([F,P])=      0.000000185831, max([F,P])=      0.000000017517
 ***** SPIN 1 *****
 orbitals (Q,E):
 ---------------
 A :20...30          ( 1.00    -0.3850)  ( 1.00    -0.3681)  ( 1.00    -0.3638)  ( 1.00    -0.3501)
                     ( 1.00    -0.3146)  ( 1.00    -0.2517)  ( 1.00    -0.2371)  ( 1.00    -0.2311)
                     ( 1.00    -0.2190)  ( 1.00    -0.1184)  ( 0.00    -0.0807)
 ***** SPIN 2 *****
 orbitals (Q,E):
 ---------------
 A :18...28          ( 1.00    -0.3832)  ( 1.00    -0.3828)  ( 1.00    -0.3788)  ( 1.00    -0.3586)
                     ( 1.00    -0.3585)  ( 1.00    -0.3466)  ( 1.00    -0.2930)  ( 1.00    -0.2334)
                     ( 1.00    -0.2296)  ( 1.00    -0.2142)  ( 0.00    -0.1948)
  
 Spin polar: 2 (Spin_A minus Spin_B electrons)

 CYCLE   21
  SDIIS (wt  1.000): -0.0002 -0.0005 -0.0018  0.0007 -0.0107  0.0015  0.0387  0.1307  0.4003  0.4414
  DIIS coefficients: -0.0002 -0.0005 -0.0018  0.0007 -0.0107  0.0015  0.0387  0.1307  0.4003  0.4414
 SCF Error: norm([F,P])=      0.000000082697, max([F,P])=      0.000000007693
 ***** SPIN 1 *****
 orbitals (Q,E):
 ---------------
 A :20...30          ( 1.00    -0.3850)  ( 1.00    -0.3681)  ( 1.00    -0.3638)  ( 1.00    -0.3501)
                     ( 1.00    -0.3146)  ( 1.00    -0.2517)  ( 1.00    -0.2371)  ( 1.00    -0.2311)
                     ( 1.00    -0.2190)  ( 1.00    -0.1184)  ( 0.00    -0.0807)
 ***** SPIN 2 *****
 orbitals (Q,E):
 ---------------
 A :18...28          ( 1.00    -0.3832)  ( 1.00    -0.3828)  ( 1.00    -0.3788)  ( 1.00    -0.3586)
                     ( 1.00    -0.3585)  ( 1.00    -0.3466)  ( 1.00    -0.2930)  ( 1.00    -0.2334)
                     ( 1.00    -0.2296)  ( 1.00    -0.2142)  ( 0.00    -0.1948)
  
 Spin polar: 2 (Spin_A minus Spin_B electrons)

 SCF CONVERGED

 CYCLE   22
 *** Setting up for NEW gradients in Focky
 *** Using FIT density in Focky
 ***** SPIN 1 *****
 orbitals (Q,E):
 ---------------
 A :20...39          ( 1.00    -0.3850)  ( 1.00    -0.3681)  ( 1.00    -0.3638)  ( 1.00    -0.3501)
                     ( 1.00    -0.3146)  ( 1.00    -0.2517)  ( 1.00    -0.2371)  ( 1.00    -0.2311)
                     ( 1.00    -0.2190)  ( 1.00    -0.1184)  ( 0.00    -0.0807)  ( 0.00    -0.0345)
                     ( 0.00    -0.0038)  ( 0.00     0.0085)  ( 0.00     0.0159)  ( 0.00     0.0273)
                     ( 0.00     0.0377)  ( 0.00     0.0582)  ( 0.00     0.0647)  ( 0.00     0.0890)
 ***** SPIN 2 *****
 orbitals (Q,E):
 ---------------
 A :18...37          ( 1.00    -0.3832)  ( 1.00    -0.3828)  ( 1.00    -0.3788)  ( 1.00    -0.3586)
                     ( 1.00    -0.3585)  ( 1.00    -0.3466)  ( 1.00    -0.2930)  ( 1.00    -0.2334)
                     ( 1.00    -0.2296)  ( 1.00    -0.2142)  ( 0.00    -0.1948)  ( 0.00    -0.0800)
                     ( 0.00    -0.0614)  ( 0.00    -0.0320)  ( 0.00    -0.0006)  ( 0.00     0.0108)
                     ( 0.00     0.0228)  ( 0.00     0.0405)  ( 0.00     0.0449)  ( 0.00     0.0617)
  
 Spin polar: 2 (Spin_A minus Spin_B electrons)


 Fit test: (difference of exact and fit density, squared integrated, result summed over spins)
         SCF:                                          0.00001567454115

 Gross Charges per Atom (Z minus electrons)
 ==========================================
            -0.1318    0.0193   -0.0624    0.0893   -0.6027    0.0004    0.6301    0.0238    0.2778    0.0028
             0.4192   -0.1688   -0.1314   -0.2002   -0.1652
 Net Total: -0.00000000


 =================================================================
 M U L T I P O L E   D E R I V E D   C H A R G E   A N A L Y S I S
 =================================================================

 See: M. Swart, P.Th. van Duijnen, J.G. Snijders, J.Comput.Chem., (2001), p. 79-88.

 ----------------------------------------------------- 
 MDC atomic charges (includes spinA + spinB electrons)
 ----------------------------------------------------- 

        Atom    Level:     MDC-m        MDC-d        MDC-q
 ---------------------------------------------------------
     1     H           -0.041802    -0.011173    -1.889033
     2     H            0.047609     0.128446     1.389916
     3     N           -0.075969    -0.007469     6.572320
     4     N            0.000645     0.062482    10.910285
     5     O           -0.396937    -0.502915     1.037647
     6     H            0.049544     0.114401     0.747673
     7     C            0.236329     0.337084    -6.954959
     8     C            0.025371     0.021338     5.870097
     9     C            0.094363     0.099091     0.969048
    10     C           -0.163160    -0.171048   -15.705805
    11     C            0.218890     0.170272     1.338546
    12     H           -0.045828    -0.019791    -6.604641
    13     H           -0.041651    -0.011701    -1.894351
    14     H           -0.062279    -0.057977     2.497596
    15     S            0.154876    -0.151042     1.715661

 -------------------------------- 
 MDC spin density (spinA - spinB)
 -------------------------------- 

        Atom    Level:     MDC-m        MDC-d        MDC-q
 ---------------------------------------------------------
     1     H            0.036138     0.042021     0.444840
     2     H            0.008258     0.013971    -1.981613
     3     N            0.126934     0.116588     0.384770
     4     N            0.121035     0.120319    -7.757074
     5     O            0.074745     0.073030    -0.262846
     6     H            0.003010     0.002873     0.750420
     7     C            0.049577     0.067516     1.456587
     8     C            0.504645     0.437451    -1.141923
     9     C            0.410889     0.401789    -0.127046
    10     C            0.145977     0.127577     7.458521
    11     C            0.019457     0.029311     0.972089
    12     H            0.029461     0.057125     3.481987
    13     H            0.036011     0.043764     0.441091
    14     H            0.002315     0.007179    -1.766476
    15     S            0.431548     0.459485    -0.353325


 ==========
 S**2 value  ***  see also R. Bulo et al., J.Am.Chem.Soc., 124 (2002) 13903-13910, note (29)  ***
 ==========
  
                                       exact      expectation value

 Total S2 (S squared)                  2.00000             2.00707
 *** Using NEW gradient routines ***


 Geometry CYCLE 3
 ==============

 Energy gradients wrt nuclear displacements
 ==========================================

     Atom      Cartesian (a.u./angstrom)
                 X         Y         Z
 ----------------------------------------
     1 H     0.001626  0.000810 -0.000120
     2 H     0.001898  0.000756  0.000137
     3 N    -0.035917 -0.005333 -0.000968
     4 N    -0.013718  0.006610  0.001043
     5 O     0.007803  0.015461  0.002531
     6 H    -0.003672  0.001175  0.000220
     7 C     0.011606 -0.022827 -0.003796
     8 C     0.001606  0.007757  0.001364
     9 C     0.007769 -0.004265 -0.000735
    10 C    -0.004096  0.006654  0.001205
    11 C    -0.007253 -0.003875 -0.000609
    12 H     0.000875  0.000818  0.000055
    13 H     0.001597  0.000748  0.000429
    14 H     0.000472  0.000934  0.000155
    15 S     0.029404 -0.005420 -0.000911
 ----------------------------------------

 dE(predicted):    -0.44254E-02, dE(actual):    -0.52944E-02, Trust radius:    0.774597, all in a.u.
 
----------------------------------------------------------------------
Geometry Convergence after Step   3       (Hartree/Angstrom,Angstrom)
----------------------------------------------------------------------
current energy                               -3.37535457 Hartree
energy change                      -0.00529440     0.00100000    F
constrained gradient max            0.03591720     0.00100000    F
constrained gradient rms            0.00909965     0.00066667    F
gradient max                        0.03591720
gradient rms                        0.00909965
cart. step max                      0.01810789     0.01000000    F
cart. step rms                      0.00675245     0.00666667    F
 


 Coordinates (Cartesian)
 =======================

     Atom                    bohr                                 angstrom                 Geometric Variables
                   X           Y           Z              X           Y           Z       (0:frozen, *:LT par.)
 --------------------------------------------------------------------------------------------------------------
     1 H      -5.167405    0.263859   -1.681783      -2.734473    0.139628   -0.889961      1       2       3
     2 H       2.641215   -4.382425   -0.626523       1.397671   -2.319080   -0.331541      4       5       6
     3 N       1.986363   -2.597088   -0.362753       1.051138   -1.374320   -0.191960      7       8       9
     4 N       2.846818    1.662127    0.260888       1.506471    0.879560    0.138056     10      11      12
     5 O      -2.069895   -4.106594   -0.604727      -1.095341   -2.173116   -0.320008     13      14      15
     6 H       4.197555    3.018915    0.461439       2.221250    1.597541    0.244183     16      17      18
     7 C      -0.669142   -2.258663   -0.321736      -0.354094   -1.195233   -0.170255     19      20      21
     8 C      -1.511572    0.307452    0.045953      -0.799890    0.162697    0.024317     22      23      24
     9 C       0.376777    2.314672    0.358820       0.199382    1.224872    0.189879     25      26      27
    10 C       3.786869   -0.702774   -0.093340       2.003925   -0.371892   -0.049394     28      29      30
    11 C      -4.258214    0.861924    0.094620      -2.253350    0.456110    0.050071     31      32      33
    12 H      -0.073792    4.292149    0.655265      -0.039049    2.271308    0.346751     34      35      36
    13 H      -5.208197   -0.220063    1.599941      -2.756059   -0.116452    0.846653     37      38      39
    14 H      -4.623949    2.881059    0.387184      -2.446888    1.524591    0.204889     40      41      42
    15 S       6.949322   -1.242056   -0.196965       3.677423   -0.657268   -0.104229     43      44      45
 --------------------------------------------------------------------------------------------------------------

 Number of elements of the density matrix on this node (used, total):      4029     58311


 ===========================================
 Numerical Integration : Fuzzy Cells (Becke)
 ===========================================
  
 Becke grid quality: GOOD           
  
 Lebedev angular grid order:             min:  11 max:  31
 Nr. of radial points:                   min:  54 max:  69

 Total nr. of points:     188992
 Nr. of blocks:             1477
 Block length:               128
 Nr. of dummy points:         64


 Test of Precision of the Numerical Integration Grid
 ===================================================

 Integral of the Total Core Density:                  18.00000623238989
 Relative Error:                                       3.462E-07


 ========================
 Density Fitting (zlmFit)
 ========================
  
 ZlmFit Fit Quality: GOOD           
  
 Max L-expansion:                        min:   8 max:   9
 Nr. of radial interpolation points:     min:  78 max: 108


 =====
 S C F  ***  ScaSCF  ***
 =====
  
 Initial density matrix is taken from previous geometry

 CYCLE    1
 SCF Error: norm([F,P])=      0.039272979028, max([F,P])=      0.006316424509
 ***** SPIN 1 *****
 orbitals (Q,E):
 ---------------
 A :20...39          ( 1.00    -0.3851)  ( 1.00    -0.3674)  ( 1.00    -0.3628)  ( 1.00    -0.3509)
                     ( 1.00    -0.3147)  ( 1.00    -0.2515)  ( 1.00    -0.2378)  ( 1.00    -0.2305)
                     ( 1.00    -0.2179)  ( 1.00    -0.1186)  ( 0.00    -0.0793)  ( 0.00    -0.0339)
                     ( 0.00    -0.0040)  ( 0.00     0.0089)  ( 0.00     0.0207)  ( 0.00     0.0252)
                     ( 0.00     0.0378)  ( 0.00     0.0578)  ( 0.00     0.0640)  ( 0.00     0.0884)
 ***** SPIN 2 *****
 orbitals (Q,E):
 ---------------
 A :18...37          ( 1.00    -0.3839)  ( 1.00    -0.3831)  ( 1.00    -0.3795)  ( 1.00    -0.3579)
                     ( 1.00    -0.3575)  ( 1.00    -0.3473)  ( 1.00    -0.2931)  ( 1.00    -0.2342)
                     ( 1.00    -0.2292)  ( 1.00    -0.2130)  ( 0.00    -0.1946)  ( 0.00    -0.0800)
                     ( 0.00    -0.0607)  ( 0.00    -0.0313)  ( 0.00    -0.0008)  ( 0.00     0.0111)
                     ( 0.00     0.0275)  ( 0.00     0.0406)  ( 0.00     0.0435)  ( 0.00     0.0614)
  
 Spin polar: 2 (Spin_A minus Spin_B electrons)

 CYCLE    2
   MIX coefficients:  0.8000  0.2000
 SCF Error: norm([F,P])=      0.063092892972, max([F,P])=      0.006031271609
 ***** SPIN 1 *****
 orbitals (Q,E):
 ---------------
 A :20...30          ( 1.00    -0.3842)  ( 1.00    -0.3660)  ( 1.00    -0.3639)  ( 1.00    -0.3493)
                     ( 1.00    -0.3151)  ( 1.00    -0.2516)  ( 1.00    -0.2366)  ( 1.00    -0.2311)
                     ( 1.00    -0.2198)  ( 1.00    -0.1179)  ( 0.00    -0.0801)
 ***** SPIN 2 *****
 orbitals (Q,E):
 ---------------
 A :18...28          ( 1.00    -0.3822)  ( 1.00    -0.3818)  ( 1.00    -0.3794)  ( 1.00    -0.3589)
                     ( 1.00    -0.3563)  ( 1.00    -0.3458)  ( 1.00    -0.2936)  ( 1.00    -0.2328)
                     ( 1.00    -0.2299)  ( 1.00    -0.2150)  ( 0.00    -0.1947)
  
 Spin polar: 2 (Spin_A minus Spin_B electrons)

 CYCLE    3
  SDIIS (wt  0.000):  0.2931  0.7069
 A-DIIS (wt  1.000):  0.2786  0.7214
  DIIS coefficients:  0.2786  0.7214
 SCF Error: norm([F,P])=      0.031821903367, max([F,P])=      0.003255743013
 ***** SPIN 1 *****
 orbitals (Q,E):
 ---------------
 A :20...30          ( 1.00    -0.3860)  ( 1.00    -0.3671)  ( 1.00    -0.3637)  ( 1.00    -0.3518)
                     ( 1.00    -0.3166)  ( 1.00    -0.2522)  ( 1.00    -0.2378)  ( 1.00    -0.2309)
                     ( 1.00    -0.2176)  ( 1.00    -0.1201)  ( 0.00    -0.0813)
 ***** SPIN 2 *****
 orbitals (Q,E):
 ---------------
 A :18...28          ( 1.00    -0.3845)  ( 1.00    -0.3843)  ( 1.00    -0.3811)  ( 1.00    -0.3585)
                     ( 1.00    -0.3570)  ( 1.00    -0.3481)  ( 1.00    -0.2949)  ( 1.00    -0.2341)
                     ( 1.00    -0.2299)  ( 1.00    -0.2128)  ( 0.00    -0.1954)
  
 Spin polar: 2 (Spin_A minus Spin_B electrons)

 CYCLE    4
  SDIIS (wt  0.000):  0.1300  0.5975  0.2725
 A-DIIS (wt  1.000):  0.1042  0.6536  0.2421
  DIIS coefficients:  0.1042  0.6536  0.2421
 SCF Error: norm([F,P])=      0.058129025348, max([F,P])=      0.005654930628
 ***** SPIN 1 *****
 orbitals (Q,E):
 ---------------
 A :20...30          ( 1.00    -0.3853)  ( 1.00    -0.3666)  ( 1.00    -0.3634)  ( 1.00    -0.3508)
                     ( 1.00    -0.3154)  ( 1.00    -0.2516)  ( 1.00    -0.2371)  ( 1.00    -0.2310)
                     ( 1.00    -0.2185)  ( 1.00    -0.1190)  ( 0.00    -0.0800)
 ***** SPIN 2 *****
 orbitals (Q,E):
 ---------------
 A :18...28          ( 1.00    -0.3833)  ( 1.00    -0.3833)  ( 1.00    -0.3802)  ( 1.00    -0.3583)
                     ( 1.00    -0.3565)  ( 1.00    -0.3472)  ( 1.00    -0.2937)  ( 1.00    -0.2334)
                     ( 1.00    -0.2295)  ( 1.00    -0.2137)  ( 0.00    -0.1951)
  
 Spin polar: 2 (Spin_A minus Spin_B electrons)

 CYCLE    5
  SDIIS (wt  0.985): -0.0199  0.4655  0.1191  0.4353
 A-DIIS (wt  0.015):  0.0000  0.4080  0.0000  0.5920
  DIIS coefficients: -0.0196  0.4646  0.1172  0.4377
 SCF Error: norm([F,P])=      0.023529461890, max([F,P])=      0.002522151930
 ***** SPIN 1 *****
 orbitals (Q,E):
 ---------------
 A :20...30          ( 1.00    -0.3850)  ( 1.00    -0.3666)  ( 1.00    -0.3637)  ( 1.00    -0.3503)
                     ( 1.00    -0.3155)  ( 1.00    -0.2518)  ( 1.00    -0.2369)  ( 1.00    -0.2310)
                     ( 1.00    -0.2190)  ( 1.00    -0.1187)  ( 0.00    -0.0803)
 ***** SPIN 2 *****
 orbitals (Q,E):
 ---------------
 A :18...28          ( 1.00    -0.3831)  ( 1.00    -0.3828)  ( 1.00    -0.3800)  ( 1.00    -0.3587)
                     ( 1.00    -0.3565)  ( 1.00    -0.3467)  ( 1.00    -0.2939)  ( 1.00    -0.2332)
                     ( 1.00    -0.2298)  ( 1.00    -0.2142)  ( 0.00    -0.1950)
  
 Spin polar: 2 (Spin_A minus Spin_B electrons)

 CYCLE    6
  SDIIS (wt  1.000): -0.0390  0.1824  0.0364  0.2836  0.5366
  DIIS coefficients: -0.0390  0.1824  0.0364  0.2836  0.5366
 SCF Error: norm([F,P])=      0.002854994495, max([F,P])=      0.000252587820
 ***** SPIN 1 *****
 orbitals (Q,E):
 ---------------
 A :20...30          ( 1.00    -0.3850)  ( 1.00    -0.3665)  ( 1.00    -0.3637)  ( 1.00    -0.3504)
                     ( 1.00    -0.3155)  ( 1.00    -0.2517)  ( 1.00    -0.2370)  ( 1.00    -0.2310)
                     ( 1.00    -0.2190)  ( 1.00    -0.1187)  ( 0.00    -0.0802)
 ***** SPIN 2 *****
 orbitals (Q,E):
 ---------------
 A :18...28          ( 1.00    -0.3831)  ( 1.00    -0.3829)  ( 1.00    -0.3801)  ( 1.00    -0.3587)
                     ( 1.00    -0.3564)  ( 1.00    -0.3467)  ( 1.00    -0.2939)  ( 1.00    -0.2332)
                     ( 1.00    -0.2298)  ( 1.00    -0.2142)  ( 0.00    -0.1950)
  
 Spin polar: 2 (Spin_A minus Spin_B electrons)

 CYCLE    7
  SDIIS (wt  1.000): -0.0121  0.0039  0.0126  0.0203  0.2836  0.6917
  DIIS coefficients: -0.0121  0.0039  0.0126  0.0203  0.2836  0.6917
 SCF Error: norm([F,P])=      0.001465081825, max([F,P])=      0.000159901254
 ***** SPIN 1 *****
 orbitals (Q,E):
 ---------------
 A :20...30          ( 1.00    -0.3850)  ( 1.00    -0.3666)  ( 1.00    -0.3637)  ( 1.00    -0.3504)
                     ( 1.00    -0.3155)  ( 1.00    -0.2517)  ( 1.00    -0.2369)  ( 1.00    -0.2310)
                     ( 1.00    -0.2189)  ( 1.00    -0.1188)  ( 0.00    -0.0802)
 ***** SPIN 2 *****
 orbitals (Q,E):
 ---------------
 A :18...28          ( 1.00    -0.3832)  ( 1.00    -0.3828)  ( 1.00    -0.3801)  ( 1.00    -0.3587)
                     ( 1.00    -0.3564)  ( 1.00    -0.3468)  ( 1.00    -0.2939)  ( 1.00    -0.2331)
                     ( 1.00    -0.2298)  ( 1.00    -0.2142)  ( 0.00    -0.1950)
  
 Spin polar: 2 (Spin_A minus Spin_B electrons)

 CYCLE    8
  SDIIS (wt  1.000):  0.0080 -0.1015 -0.0016 -0.1574 -0.0101  0.7370  0.5256
  DIIS coefficients:  0.0080 -0.1015 -0.0016 -0.1574 -0.0101  0.7370  0.5256
 SCF Error: norm([F,P])=      0.001513545983, max([F,P])=      0.000146313049
 ***** SPIN 1 *****
 orbitals (Q,E):
 ---------------
 A :20...30          ( 1.00    -0.3851)  ( 1.00    -0.3666)  ( 1.00    -0.3637)  ( 1.00    -0.3504)
                     ( 1.00    -0.3155)  ( 1.00    -0.2518)  ( 1.00    -0.2370)  ( 1.00    -0.2310)
                     ( 1.00    -0.2189)  ( 1.00    -0.1188)  ( 0.00    -0.0802)
 ***** SPIN 2 *****
 orbitals (Q,E):
 ---------------
 A :18...28          ( 1.00    -0.3832)  ( 1.00    -0.3829)  ( 1.00    -0.3801)  ( 1.00    -0.3588)
                     ( 1.00    -0.3564)  ( 1.00    -0.3468)  ( 1.00    -0.2939)  ( 1.00    -0.2332)
                     ( 1.00    -0.2298)  ( 1.00    -0.2142)  ( 0.00    -0.1949)
  
 Spin polar: 2 (Spin_A minus Spin_B electrons)

 CYCLE    9
  SDIIS (wt  1.000):  0.0095 -0.0774 -0.0004 -0.1313 -0.0593  0.4381  0.4066  0.4142
  DIIS coefficients:  0.0095 -0.0774 -0.0004 -0.1313 -0.0593  0.4381  0.4066  0.4142
 SCF Error: norm([F,P])=      0.000615689047, max([F,P])=      0.000058398588
 ***** SPIN 1 *****
 orbitals (Q,E):
 ---------------
 A :20...30          ( 1.00    -0.3851)  ( 1.00    -0.3666)  ( 1.00    -0.3637)  ( 1.00    -0.3504)
                     ( 1.00    -0.3155)  ( 1.00    -0.2518)  ( 1.00    -0.2370)  ( 1.00    -0.2310)
                     ( 1.00    -0.2189)  ( 1.00    -0.1188)  ( 0.00    -0.0802)
 ***** SPIN 2 *****
 orbitals (Q,E):
 ---------------
 A :18...28          ( 1.00    -0.3832)  ( 1.00    -0.3829)  ( 1.00    -0.3801)  ( 1.00    -0.3588)
                     ( 1.00    -0.3564)  ( 1.00    -0.3468)  ( 1.00    -0.2939)  ( 1.00    -0.2332)
                     ( 1.00    -0.2298)  ( 1.00    -0.2142)  ( 0.00    -0.1950)
  
 Spin polar: 2 (Spin_A minus Spin_B electrons)

 CYCLE   10
  SDIIS (wt  1.000):  0.0042 -0.0218  0.0019 -0.0427 -0.0293  0.0783  0.1178  0.2279  0.6637
  DIIS coefficients:  0.0042 -0.0218  0.0019 -0.0427 -0.0293  0.0783  0.1178  0.2279  0.6637
 SCF Error: norm([F,P])=      0.000178272326, max([F,P])=      0.000016238907
 ***** SPIN 1 *****
 orbitals (Q,E):
 ---------------
 A :20...30          ( 1.00    -0.3851)  ( 1.00    -0.3666)  ( 1.00    -0.3637)  ( 1.00    -0.3505)
                     ( 1.00    -0.3155)  ( 1.00    -0.2518)  ( 1.00    -0.2370)  ( 1.00    -0.2310)
                     ( 1.00    -0.2189)  ( 1.00    -0.1188)  ( 0.00    -0.0802)
 ***** SPIN 2 *****
 orbitals (Q,E):
 ---------------
 A :18...28          ( 1.00    -0.3832)  ( 1.00    -0.3829)  ( 1.00    -0.3801)  ( 1.00    -0.3588)
                     ( 1.00    -0.3564)  ( 1.00    -0.3468)  ( 1.00    -0.2939)  ( 1.00    -0.2332)
                     ( 1.00    -0.2298)  ( 1.00    -0.2142)  ( 0.00    -0.1950)
  
 Spin polar: 2 (Spin_A minus Spin_B electrons)

 CYCLE   11
  SDIIS (wt  1.000):  0.0019 -0.0058  0.0016 -0.0137 -0.0119  0.0051  0.0314  0.1022  0.4226  0.4665
  DIIS coefficients:  0.0019 -0.0058  0.0016 -0.0137 -0.0119  0.0051  0.0314  0.1022  0.4226  0.4665
 SCF Error: norm([F,P])=      0.000084315272, max([F,P])=      0.000006620459
 ***** SPIN 1 *****
 orbitals (Q,E):
 ---------------
 A :20...30          ( 1.00    -0.3851)  ( 1.00    -0.3666)  ( 1.00    -0.3637)  ( 1.00    -0.3505)
                     ( 1.00    -0.3155)  ( 1.00    -0.2518)  ( 1.00    -0.2370)  ( 1.00    -0.2310)
                     ( 1.00    -0.2189)  ( 1.00    -0.1188)  ( 0.00    -0.0802)
 ***** SPIN 2 *****
 orbitals (Q,E):
 ---------------
 A :18...28          ( 1.00    -0.3832)  ( 1.00    -0.3829)  ( 1.00    -0.3801)  ( 1.00    -0.3588)
                     ( 1.00    -0.3564)  ( 1.00    -0.3468)  ( 1.00    -0.2939)  ( 1.00    -0.2332)
                     ( 1.00    -0.2298)  ( 1.00    -0.2142)  ( 0.00    -0.1950)
  
 Spin polar: 2 (Spin_A minus Spin_B electrons)

 CYCLE   12
  SDIIS (wt  1.000):  0.0036  0.0005  0.0060  0.0022 -0.0271 -0.0222 -0.0044  0.0816  0.2882  0.6716
  DIIS coefficients:  0.0036  0.0005  0.0060  0.0022 -0.0271 -0.0222 -0.0044  0.0816  0.2882  0.6716
 SCF Error: norm([F,P])=      0.000040862740, max([F,P])=      0.000004213503
 ***** SPIN 1 *****
 orbitals (Q,E):
 ---------------
 A :20...30          ( 1.00    -0.3851)  ( 1.00    -0.3666)  ( 1.00    -0.3637)  ( 1.00    -0.3505)
                     ( 1.00    -0.3155)  ( 1.00    -0.2518)  ( 1.00    -0.2370)  ( 1.00    -0.2310)
                     ( 1.00    -0.2189)  ( 1.00    -0.1188)  ( 0.00    -0.0802)
 ***** SPIN 2 *****
 orbitals (Q,E):
 ---------------
 A :18...28          ( 1.00    -0.3832)  ( 1.00    -0.3829)  ( 1.00    -0.3801)  ( 1.00    -0.3588)
                     ( 1.00    -0.3564)  ( 1.00    -0.3468)  ( 1.00    -0.2939)  ( 1.00    -0.2332)
                     ( 1.00    -0.2298)  ( 1.00    -0.2142)  ( 0.00    -0.1950)
  
 Spin polar: 2 (Spin_A minus Spin_B electrons)

 CYCLE   13
  SDIIS (wt  1.000): -0.0001  0.0008  0.0008 -0.0006 -0.0029 -0.0037 -0.0033  0.0743  0.3922  0.5424
  DIIS coefficients: -0.0001  0.0008  0.0008 -0.0006 -0.0029 -0.0037 -0.0033  0.0743  0.3922  0.5424
 SCF Error: norm([F,P])=      0.000016943413, max([F,P])=      0.000001442068
 ***** SPIN 1 *****
 orbitals (Q,E):
 ---------------
 A :20...30          ( 1.00    -0.3851)  ( 1.00    -0.3666)  ( 1.00    -0.3637)  ( 1.00    -0.3505)
                     ( 1.00    -0.3155)  ( 1.00    -0.2518)  ( 1.00    -0.2370)  ( 1.00    -0.2310)
                     ( 1.00    -0.2189)  ( 1.00    -0.1188)  ( 0.00    -0.0802)
 ***** SPIN 2 *****
 orbitals (Q,E):
 ---------------
 A :18...28          ( 1.00    -0.3832)  ( 1.00    -0.3829)  ( 1.00    -0.3801)  ( 1.00    -0.3588)
                     ( 1.00    -0.3564)  ( 1.00    -0.3468)  ( 1.00    -0.2939)  ( 1.00    -0.2332)
                     ( 1.00    -0.2298)  ( 1.00    -0.2142)  ( 0.00    -0.1950)
  
 Spin polar: 2 (Spin_A minus Spin_B electrons)

 CYCLE   14
  SDIIS (wt  1.000):  0.0001  0.0002  0.0005  0.0001 -0.0008 -0.0033  0.0079  0.0943  0.2819  0.6191
  DIIS coefficients:  0.0001  0.0002  0.0005  0.0001 -0.0008 -0.0033  0.0079  0.0943  0.2819  0.6191
 SCF Error: norm([F,P])=      0.000005657917, max([F,P])=      0.000000460074
 ***** SPIN 1 *****
 orbitals (Q,E):
 ---------------
 A :20...30          ( 1.00    -0.3851)  ( 1.00    -0.3666)  ( 1.00    -0.3637)  ( 1.00    -0.3505)
                     ( 1.00    -0.3155)  ( 1.00    -0.2518)  ( 1.00    -0.2370)  ( 1.00    -0.2310)
                     ( 1.00    -0.2189)  ( 1.00    -0.1188)  ( 0.00    -0.0802)
 ***** SPIN 2 *****
 orbitals (Q,E):
 ---------------
 A :18...28          ( 1.00    -0.3832)  ( 1.00    -0.3829)  ( 1.00    -0.3801)  ( 1.00    -0.3588)
                     ( 1.00    -0.3564)  ( 1.00    -0.3468)  ( 1.00    -0.2939)  ( 1.00    -0.2332)
                     ( 1.00    -0.2298)  ( 1.00    -0.2142)  ( 0.00    -0.1950)
  
 Spin polar: 2 (Spin_A minus Spin_B electrons)

 CYCLE   15
  SDIIS (wt  1.000):  0.0002  0.0002 -0.0002 -0.0022 -0.0117 -0.0210 -0.0355  0.0564  0.3406  0.6733
  DIIS coefficients:  0.0002  0.0002 -0.0002 -0.0022 -0.0117 -0.0210 -0.0355  0.0564  0.3406  0.6733
 SCF Error: norm([F,P])=      0.000005187995, max([F,P])=      0.000000557939
 ***** SPIN 1 *****
 orbitals (Q,E):
 ---------------
 A :20...30          ( 1.00    -0.3851)  ( 1.00    -0.3666)  ( 1.00    -0.3637)  ( 1.00    -0.3505)
                     ( 1.00    -0.3155)  ( 1.00    -0.2518)  ( 1.00    -0.2370)  ( 1.00    -0.2310)
                     ( 1.00    -0.2189)  ( 1.00    -0.1188)  ( 0.00    -0.0802)
 ***** SPIN 2 *****
 orbitals (Q,E):
 ---------------
 A :18...28          ( 1.00    -0.3832)  ( 1.00    -0.3829)  ( 1.00    -0.3801)  ( 1.00    -0.3588)
                     ( 1.00    -0.3564)  ( 1.00    -0.3468)  ( 1.00    -0.2939)  ( 1.00    -0.2332)
                     ( 1.00    -0.2298)  ( 1.00    -0.2142)  ( 0.00    -0.1950)
  
 Spin polar: 2 (Spin_A minus Spin_B electrons)

 CYCLE   16
  SDIIS (wt  1.000):  0.0001 -0.0001 -0.0009 -0.0056 -0.0125 -0.0274  0.0067  0.1178  0.2948  0.6269
  DIIS coefficients:  0.0001 -0.0001 -0.0009 -0.0056 -0.0125 -0.0274  0.0067  0.1178  0.2948  0.6269
 SCF Error: norm([F,P])=      0.000001158110, max([F,P])=      0.000000115942
 ***** SPIN 1 *****
 orbitals (Q,E):
 ---------------
 A :20...30          ( 1.00    -0.3851)  ( 1.00    -0.3666)  ( 1.00    -0.3637)  ( 1.00    -0.3505)
                     ( 1.00    -0.3155)  ( 1.00    -0.2518)  ( 1.00    -0.2370)  ( 1.00    -0.2310)
                     ( 1.00    -0.2189)  ( 1.00    -0.1188)  ( 0.00    -0.0802)
 ***** SPIN 2 *****
 orbitals (Q,E):
 ---------------
 A :18...28          ( 1.00    -0.3832)  ( 1.00    -0.3829)  ( 1.00    -0.3801)  ( 1.00    -0.3588)
                     ( 1.00    -0.3564)  ( 1.00    -0.3468)  ( 1.00    -0.2939)  ( 1.00    -0.2332)
                     ( 1.00    -0.2298)  ( 1.00    -0.2142)  ( 0.00    -0.1950)
  
 Spin polar: 2 (Spin_A minus Spin_B electrons)

 CYCLE   17
  SDIIS (wt  1.000): -0.0000 -0.0004 -0.0025 -0.0071 -0.0185 -0.0029  0.0615  0.1718  0.4355  0.3628
  DIIS coefficients: -0.0000 -0.0004 -0.0025 -0.0071 -0.0185 -0.0029  0.0615  0.1718  0.4355  0.3628
 SCF Error: norm([F,P])=      0.000000794827, max([F,P])=      0.000000068245
 ***** SPIN 1 *****
 orbitals (Q,E):
 ---------------
 A :20...30          ( 1.00    -0.3851)  ( 1.00    -0.3666)  ( 1.00    -0.3637)  ( 1.00    -0.3505)
                     ( 1.00    -0.3155)  ( 1.00    -0.2518)  ( 1.00    -0.2370)  ( 1.00    -0.2310)
                     ( 1.00    -0.2189)  ( 1.00    -0.1188)  ( 0.00    -0.0802)
 ***** SPIN 2 *****
 orbitals (Q,E):
 ---------------
 A :18...28          ( 1.00    -0.3832)  ( 1.00    -0.3829)  ( 1.00    -0.3801)  ( 1.00    -0.3588)
                     ( 1.00    -0.3564)  ( 1.00    -0.3468)  ( 1.00    -0.2939)  ( 1.00    -0.2332)
                     ( 1.00    -0.2298)  ( 1.00    -0.2142)  ( 0.00    -0.1950)
  
 Spin polar: 2 (Spin_A minus Spin_B electrons)

 CYCLE   18
  SDIIS (wt  1.000):  0.0001  0.0001 -0.0011 -0.0041 -0.0051  0.0043  0.0224  0.1566  0.1954  0.6314
  DIIS coefficients:  0.0001  0.0001 -0.0011 -0.0041 -0.0051  0.0043  0.0224  0.1566  0.1954  0.6314
 SCF Error: norm([F,P])=      0.000000233987, max([F,P])=      0.000000018369
 ***** SPIN 1 *****
 orbitals (Q,E):
 ---------------
 A :20...30          ( 1.00    -0.3851)  ( 1.00    -0.3666)  ( 1.00    -0.3637)  ( 1.00    -0.3505)
                     ( 1.00    -0.3155)  ( 1.00    -0.2518)  ( 1.00    -0.2370)  ( 1.00    -0.2310)
                     ( 1.00    -0.2189)  ( 1.00    -0.1188)  ( 0.00    -0.0802)
 ***** SPIN 2 *****
 orbitals (Q,E):
 ---------------
 A :18...28          ( 1.00    -0.3832)  ( 1.00    -0.3829)  ( 1.00    -0.3801)  ( 1.00    -0.3588)
                     ( 1.00    -0.3564)  ( 1.00    -0.3468)  ( 1.00    -0.2939)  ( 1.00    -0.2332)
                     ( 1.00    -0.2298)  ( 1.00    -0.2142)  ( 0.00    -0.1950)
  
 Spin polar: 2 (Spin_A minus Spin_B electrons)

 CYCLE   19
  SDIIS (wt  1.000): -0.0001 -0.0010 -0.0029 -0.0019  0.0103  0.0287  0.0913  0.1078  0.3850  0.3829
  DIIS coefficients: -0.0001 -0.0010 -0.0029 -0.0019  0.0103  0.0287  0.0913  0.1078  0.3850  0.3829
 SCF Error: norm([F,P])=      0.000000141249, max([F,P])=      0.000000013197
 ***** SPIN 1 *****
 orbitals (Q,E):
 ---------------
 A :20...30          ( 1.00    -0.3851)  ( 1.00    -0.3666)  ( 1.00    -0.3637)  ( 1.00    -0.3505)
                     ( 1.00    -0.3155)  ( 1.00    -0.2518)  ( 1.00    -0.2370)  ( 1.00    -0.2310)
                     ( 1.00    -0.2189)  ( 1.00    -0.1188)  ( 0.00    -0.0802)
 ***** SPIN 2 *****
 orbitals (Q,E):
 ---------------
 A :18...28          ( 1.00    -0.3832)  ( 1.00    -0.3829)  ( 1.00    -0.3801)  ( 1.00    -0.3588)
                     ( 1.00    -0.3564)  ( 1.00    -0.3468)  ( 1.00    -0.2939)  ( 1.00    -0.2332)
                     ( 1.00    -0.2298)  ( 1.00    -0.2142)  ( 0.00    -0.1950)
  
 Spin polar: 2 (Spin_A minus Spin_B electrons)

 CYCLE   20
  SDIIS (wt  1.000): -0.0003 -0.0007 -0.0016  0.0018  0.0073  0.0027  0.0062  0.0832  0.4314  0.4700
  DIIS coefficients: -0.0003 -0.0007 -0.0016  0.0018  0.0073  0.0027  0.0062  0.0832  0.4314  0.4700
 SCF Error: norm([F,P])=      0.000000126782, max([F,P])=      0.000000013257
 ***** SPIN 1 *****
 orbitals (Q,E):
 ---------------
 A :20...30          ( 1.00    -0.3851)  ( 1.00    -0.3666)  ( 1.00    -0.3637)  ( 1.00    -0.3505)
                     ( 1.00    -0.3155)  ( 1.00    -0.2518)  ( 1.00    -0.2370)  ( 1.00    -0.2310)
                     ( 1.00    -0.2189)  ( 1.00    -0.1188)  ( 0.00    -0.0802)
 ***** SPIN 2 *****
 orbitals (Q,E):
 ---------------
 A :18...28          ( 1.00    -0.3832)  ( 1.00    -0.3829)  ( 1.00    -0.3801)  ( 1.00    -0.3588)
                     ( 1.00    -0.3564)  ( 1.00    -0.3468)  ( 1.00    -0.2939)  ( 1.00    -0.2332)
                     ( 1.00    -0.2298)  ( 1.00    -0.2142)  ( 0.00    -0.1950)
  
 Spin polar: 2 (Spin_A minus Spin_B electrons)

 CYCLE   21
  SDIIS (wt  1.000):  0.0000 -0.0009 -0.0008 -0.0012 -0.0303 -0.0360 -0.0871  0.2132  0.3190  0.6241
  DIIS coefficients:  0.0000 -0.0009 -0.0008 -0.0012 -0.0303 -0.0360 -0.0871  0.2132  0.3190  0.6241
 SCF Error: norm([F,P])=      0.000000045747, max([F,P])=      0.000000004096
 ***** SPIN 1 *****
 orbitals (Q,E):
 ---------------
 A :20...30          ( 1.00    -0.3851)  ( 1.00    -0.3666)  ( 1.00    -0.3637)  ( 1.00    -0.3505)
                     ( 1.00    -0.3155)  ( 1.00    -0.2518)  ( 1.00    -0.2370)  ( 1.00    -0.2310)
                     ( 1.00    -0.2189)  ( 1.00    -0.1188)  ( 0.00    -0.0802)
 ***** SPIN 2 *****
 orbitals (Q,E):
 ---------------
 A :18...28          ( 1.00    -0.3832)  ( 1.00    -0.3829)  ( 1.00    -0.3801)  ( 1.00    -0.3588)
                     ( 1.00    -0.3564)  ( 1.00    -0.3468)  ( 1.00    -0.2939)  ( 1.00    -0.2332)
                     ( 1.00    -0.2298)  ( 1.00    -0.2142)  ( 0.00    -0.1950)
  
 Spin polar: 2 (Spin_A minus Spin_B electrons)

 SCF CONVERGED

 CYCLE   22
 *** Setting up for NEW gradients in Focky
 *** Using FIT density in Focky
 ***** SPIN 1 *****
 orbitals (Q,E):
 ---------------
 A :20...39          ( 1.00    -0.3851)  ( 1.00    -0.3666)  ( 1.00    -0.3637)  ( 1.00    -0.3505)
                     ( 1.00    -0.3155)  ( 1.00    -0.2518)  ( 1.00    -0.2370)  ( 1.00    -0.2310)
                     ( 1.00    -0.2189)  ( 1.00    -0.1188)  ( 0.00    -0.0802)  ( 0.00    -0.0342)
                     ( 0.00    -0.0039)  ( 0.00     0.0085)  ( 0.00     0.0194)  ( 0.00     0.0256)
                     ( 0.00     0.0378)  ( 0.00     0.0580)  ( 0.00     0.0645)  ( 0.00     0.0884)
 ***** SPIN 2 *****
 orbitals (Q,E):
 ---------------
 A :18...37          ( 1.00    -0.3832)  ( 1.00    -0.3829)  ( 1.00    -0.3801)  ( 1.00    -0.3588)
                     ( 1.00    -0.3564)  ( 1.00    -0.3468)  ( 1.00    -0.2939)  ( 1.00    -0.2332)
                     ( 1.00    -0.2298)  ( 1.00    -0.2142)  ( 0.00    -0.1950)  ( 0.00    -0.0802)
                     ( 0.00    -0.0615)  ( 0.00    -0.0316)  ( 0.00    -0.0006)  ( 0.00     0.0107)
                     ( 0.00     0.0257)  ( 0.00     0.0406)  ( 0.00     0.0440)  ( 0.00     0.0616)
  
 Spin polar: 2 (Spin_A minus Spin_B electrons)


 Fit test: (difference of exact and fit density, squared integrated, result summed over spins)
         SCF:                                          0.00001570251132

 Gross Charges per Atom (Z minus electrons)
 ==========================================
            -0.1307    0.0204   -0.0612    0.0861   -0.6012    0.0006    0.6174    0.0306    0.2675    0.0205
             0.4185   -0.1694   -0.1304   -0.1997   -0.1689
 Net Total:  0.00000000


 =================================================================
 M U L T I P O L E   D E R I V E D   C H A R G E   A N A L Y S I S
 =================================================================

 See: M. Swart, P.Th. van Duijnen, J.G. Snijders, J.Comput.Chem., (2001), p. 79-88.

 ----------------------------------------------------- 
 MDC atomic charges (includes spinA + spinB electrons)
 ----------------------------------------------------- 

        Atom    Level:     MDC-m        MDC-d        MDC-q
 ---------------------------------------------------------
     1     H           -0.041131    -0.009179    -1.031313
     2     H            0.048136     0.137881     1.637975
     3     N           -0.075735    -0.029029     0.960056
     4     N           -0.001899     0.067564     5.588404
     5     O           -0.400499    -0.502530    -3.549857
     6     H            0.048503     0.111352     1.823383
     7     C            0.235233     0.337016     7.301000
     8     C            0.028847     0.024423    -1.900837
     9     C            0.089853     0.093180     1.471197
    10     C           -0.161552    -0.155593   -11.910502
    11     C            0.218908     0.170090     1.107401
    12     H           -0.047135    -0.022584    -3.961500
    13     H           -0.040967    -0.011639    -1.046124
    14     H           -0.061810    -0.057000     1.863355
    15     S            0.161250    -0.153952     1.647361

 -------------------------------- 
 MDC spin density (spinA - spinB)
 -------------------------------- 

        Atom    Level:     MDC-m        MDC-d        MDC-q
 ---------------------------------------------------------
     1     H            0.036251     0.041458     0.324719
     2     H            0.008143     0.011194    -0.354121
     3     N            0.121565     0.118188    -1.902358
     4     N            0.124614     0.122804    -3.592926
     5     O            0.089371     0.087496     0.847473
     6     H            0.003068     0.002552    -0.529148
     7     C            0.056543     0.071847    -1.100579
     8     C            0.502387     0.436840     0.091595
     9     C            0.435601     0.425549     0.242276
    10     C            0.122501     0.104732     6.771176
    11     C            0.019632     0.029172     0.697852
    12     H            0.031357     0.060509     2.028618
    13     H            0.036056     0.044116     0.329509
    14     H            0.002453     0.007312    -1.270525
    15     S            0.410456     0.436232    -0.583562


 ==========
 S**2 value  ***  see also R. Bulo et al., J.Am.Chem.Soc., 124 (2002) 13903-13910, note (29)  ***
 ==========
  
                                       exact      expectation value

 Total S2 (S squared)                  2.00000             2.00719
 *** Using NEW gradient routines ***


 Geometry CYCLE 4
 ==============

 Energy gradients wrt nuclear displacements
 ==========================================

     Atom      Cartesian (a.u./angstrom)
                 X         Y         Z
 ----------------------------------------
     1 H     0.000792  0.000503  0.000040
     2 H     0.001632  0.000410  0.000118
     3 N    -0.018486 -0.003228 -0.001077
     4 N    -0.006409  0.000061  0.000148
     5 O    -0.004177 -0.001619 -0.000561
     6 H    -0.001204  0.001256  0.000217
     7 C     0.016723 -0.007754 -0.000185
     8 C    -0.000612  0.011325  0.001428
     9 C     0.005527 -0.006155 -0.001026
    10 C    -0.005928  0.008326  0.001420
    11 C    -0.003761 -0.002125 -0.000297
    12 H     0.000628  0.000720 -0.000001
    13 H     0.000773  0.000515  0.000178
    14 H     0.000237  0.000325  0.000053
    15 S     0.014265 -0.002559 -0.000455
 ----------------------------------------

 dE(predicted):    -0.83742E-03, dE(actual):    -0.91832E-03, Trust radius:    0.774597, all in a.u.
 
----------------------------------------------------------------------
Geometry Convergence after Step   4       (Hartree/Angstrom,Angstrom)
----------------------------------------------------------------------
current energy                               -3.37627289 Hartree
energy change                      -0.00091832     0.00100000    T
constrained gradient max            0.01848637     0.00100000    F
constrained gradient rms            0.00537286     0.00066667    F
gradient max                        0.01848637
gradient rms                        0.00537286
cart. step max                      0.01337622     0.01000000    F
cart. step rms                      0.00486219     0.00666667    T
 


 Coordinates (Cartesian)
 =======================

     Atom                    bohr                                 angstrom                 Geometric Variables
                   X           Y           Z              X           Y           Z       (0:frozen, *:LT par.)
 --------------------------------------------------------------------------------------------------------------
     1 H      -5.161830    0.273354   -1.688728      -2.731523    0.144653   -0.893637      1       2       3
     2 H       2.650727   -4.382051   -0.616529       1.402704   -2.318882   -0.326253      4       5       6
     3 N       2.003991   -2.593962   -0.354581       1.060466   -1.372666   -0.187636      7       8       9
     4 N       2.857824    1.660228    0.260916       1.512295    0.878555    0.138071     10      11      12
     5 O      -2.053701   -4.111130   -0.602461      -1.086772   -2.175517   -0.318809     13      14      15
     6 H       4.222749    3.003458    0.458014       2.234583    1.589361    0.242371     16      17      18
     7 C      -0.670565   -2.250934   -0.326557      -0.354848   -1.191143   -0.172807     19      20      21
     8 C      -1.508408    0.300852    0.044361      -0.798215    0.159204    0.023475     22      23      24
     9 C       0.375913    2.319227    0.367073       0.198924    1.227282    0.194247     25      26      27
    10 C       3.785676   -0.707120   -0.093894       2.003293   -0.374192   -0.049687     28      29      30
    11 C      -4.248935    0.865591    0.089001      -2.248439    0.458051    0.047097     31      32      33
    12 H      -0.082596    4.292580    0.671008      -0.043708    2.271535    0.355082     34      35      36
    13 H      -5.211491   -0.220579    1.584697      -2.757803   -0.116725    0.838585     37      38      39
    14 H      -4.611813    2.883564    0.387158      -2.440467    1.525916    0.204875     40      41      42
    15 S       6.924044   -1.242104   -0.200066       3.664046   -0.657293   -0.105870     43      44      45
 --------------------------------------------------------------------------------------------------------------

 Number of elements of the density matrix on this node (used, total):      4029     58311


 ===========================================
 Numerical Integration : Fuzzy Cells (Becke)
 ===========================================
  
 Becke grid quality: GOOD           
  
 Lebedev angular grid order:             min:  11 max:  31
 Nr. of radial points:                   min:  54 max:  69

 Total nr. of points:     188990
 Nr. of blocks:             1477
 Block length:               128
 Nr. of dummy points:         66


 Test of Precision of the Numerical Integration Grid
 ===================================================

 Integral of the Total Core Density:                  18.00000874324730
 Relative Error:                                       4.857E-07


 ========================
 Density Fitting (zlmFit)
 ========================
  
 ZlmFit Fit Quality: GOOD           
  
 Max L-expansion:                        min:   8 max:   9
 Nr. of radial interpolation points:     min:  78 max: 108


 =====
 S C F  ***  ScaSCF  ***
 =====
  
 Initial density matrix is taken from previous geometry

 CYCLE    1
 SCF Error: norm([F,P])=      0.035707742164, max([F,P])=      0.005936210455
 ***** SPIN 1 *****
 orbitals (Q,E):
 ---------------
 A :20...39          ( 1.00    -0.3841)  ( 1.00    -0.3648)  ( 1.00    -0.3619)  ( 1.00    -0.3500)
                     ( 1.00    -0.3147)  ( 1.00    -0.2501)  ( 1.00    -0.2361)  ( 1.00    -0.2293)
                     ( 1.00    -0.2167)  ( 1.00    -0.1181)  ( 0.00    -0.0773)  ( 0.00    -0.0327)
                     ( 0.00    -0.0033)  ( 0.00     0.0099)  ( 0.00     0.0241)  ( 0.00     0.0267)
                     ( 0.00     0.0387)  ( 0.00     0.0584)  ( 0.00     0.0653)  ( 0.00     0.0887)
 ***** SPIN 2 *****
 orbitals (Q,E):
 ---------------
 A :18...37          ( 1.00    -0.3825)  ( 1.00    -0.3823)  ( 1.00    -0.3793)  ( 1.00    -0.3570)
                     ( 1.00    -0.3545)  ( 1.00    -0.3462)  ( 1.00    -0.2931)  ( 1.00    -0.2323)
                     ( 1.00    -0.2279)  ( 1.00    -0.2119)  ( 0.00    -0.1936)  ( 0.00    -0.0789)
                     ( 0.00    -0.0592)  ( 0.00    -0.0300)  ( 0.00    -0.0001)  ( 0.00     0.0122)
                     ( 0.00     0.0302)  ( 0.00     0.0416)  ( 0.00     0.0447)  ( 0.00     0.0620)
  
 Spin polar: 2 (Spin_A minus Spin_B electrons)

 CYCLE    2
   MIX coefficients:  0.8000  0.2000
 SCF Error: norm([F,P])=      0.044334101264, max([F,P])=      0.004226893527
 ***** SPIN 1 *****
 orbitals (Q,E):
 ---------------
 A :20...30          ( 1.00    -0.3840)  ( 1.00    -0.3644)  ( 1.00    -0.3629)  ( 1.00    -0.3494)
                     ( 1.00    -0.3153)  ( 1.00    -0.2507)  ( 1.00    -0.2362)  ( 1.00    -0.2300)
                     ( 1.00    -0.2183)  ( 1.00    -0.1178)  ( 0.00    -0.0782)
 ***** SPIN 2 *****
 orbitals (Q,E):
 ---------------
 A :18...28          ( 1.00    -0.3821)  ( 1.00    -0.3817)  ( 1.00    -0.3796)  ( 1.00    -0.3582)
                     ( 1.00    -0.3540)  ( 1.00    -0.3456)  ( 1.00    -0.2937)  ( 1.00    -0.2323)
                     ( 1.00    -0.2289)  ( 1.00    -0.2136)  ( 0.00    -0.1938)
  
 Spin polar: 2 (Spin_A minus Spin_B electrons)

 CYCLE    3
  SDIIS (wt  0.000):  0.2329  0.7671
 A-DIIS (wt  1.000):  0.2266  0.7734
  DIIS coefficients:  0.2266  0.7734
 SCF Error: norm([F,P])=      0.019808851310, max([F,P])=      0.002017409439
 ***** SPIN 1 *****
 orbitals (Q,E):
 ---------------
 A :20...30          ( 1.00    -0.3867)  ( 1.00    -0.3670)  ( 1.00    -0.3639)  ( 1.00    -0.3524)
                     ( 1.00    -0.3173)  ( 1.00    -0.2528)  ( 1.00    -0.2396)  ( 1.00    -0.2307)
                     ( 1.00    -0.2179)  ( 1.00    -0.1204)  ( 0.00    -0.0801)
 ***** SPIN 2 *****
 orbitals (Q,E):
 ---------------
 A :18...28          ( 1.00    -0.3854)  ( 1.00    -0.3847)  ( 1.00    -0.3819)  ( 1.00    -0.3591)
                     ( 1.00    -0.3563)  ( 1.00    -0.3485)  ( 1.00    -0.2955)  ( 1.00    -0.2357)
                     ( 1.00    -0.2304)  ( 1.00    -0.2132)  ( 0.00    -0.1954)
  
 Spin polar: 2 (Spin_A minus Spin_B electrons)

 CYCLE    4
  SDIIS (wt  0.000):  0.0703  0.6707  0.2590
 A-DIIS (wt  1.000):  0.0454  0.7364  0.2182
  DIIS coefficients:  0.0454  0.7364  0.2182
 SCF Error: norm([F,P])=      0.047657487155, max([F,P])=      0.004898987887
 ***** SPIN 1 *****
 orbitals (Q,E):
 ---------------
 A :20...30          ( 1.00    -0.3857)  ( 1.00    -0.3661)  ( 1.00    -0.3636)  ( 1.00    -0.3515)
                     ( 1.00    -0.3165)  ( 1.00    -0.2519)  ( 1.00    -0.2381)  ( 1.00    -0.2308)
                     ( 1.00    -0.2184)  ( 1.00    -0.1196)  ( 0.00    -0.0792)
 ***** SPIN 2 *****
 orbitals (Q,E):
 ---------------
 A :18...28          ( 1.00    -0.3840)  ( 1.00    -0.3838)  ( 1.00    -0.3811)  ( 1.00    -0.3589)
                     ( 1.00    -0.3554)  ( 1.00    -0.3475)  ( 1.00    -0.2948)  ( 1.00    -0.2342)
                     ( 1.00    -0.2298)  ( 1.00    -0.2137)  ( 0.00    -0.1951)
  
 Spin polar: 2 (Spin_A minus Spin_B electrons)

 CYCLE    5
  SDIIS (wt  0.988): -0.0968  0.5228  0.0588  0.5152
 A-DIIS (wt  0.012):  0.0000  0.5082  0.0000  0.4918
  DIIS coefficients: -0.0957  0.5226  0.0581  0.5149
 SCF Error: norm([F,P])=      0.019951778752, max([F,P])=      0.002153058629
 ***** SPIN 1 *****
 orbitals (Q,E):
 ---------------
 A :20...30          ( 1.00    -0.3854)  ( 1.00    -0.3659)  ( 1.00    -0.3637)  ( 1.00    -0.3509)
                     ( 1.00    -0.3164)  ( 1.00    -0.2519)  ( 1.00    -0.2377)  ( 1.00    -0.2307)
                     ( 1.00    -0.2187)  ( 1.00    -0.1192)  ( 0.00    -0.0792)
 ***** SPIN 2 *****
 orbitals (Q,E):
 ---------------
 A :18...28          ( 1.00    -0.3835)  ( 1.00    -0.3833)  ( 1.00    -0.3808)  ( 1.00    -0.3590)
                     ( 1.00    -0.3551)  ( 1.00    -0.3470)  ( 1.00    -0.2948)  ( 1.00    -0.2338)
                     ( 1.00    -0.2299)  ( 1.00    -0.2141)  ( 0.00    -0.1949)
  
 Spin polar: 2 (Spin_A minus Spin_B electrons)

 CYCLE    6
  SDIIS (wt  1.000): -0.0852  0.2268  0.0003  0.3517  0.5064
  DIIS coefficients: -0.0852  0.2268  0.0003  0.3517  0.5064
 SCF Error: norm([F,P])=      0.002421282341, max([F,P])=      0.000194845472
 ***** SPIN 1 *****
 orbitals (Q,E):
 ---------------
 A :20...30          ( 1.00    -0.3853)  ( 1.00    -0.3658)  ( 1.00    -0.3637)  ( 1.00    -0.3510)
                     ( 1.00    -0.3164)  ( 1.00    -0.2518)  ( 1.00    -0.2376)  ( 1.00    -0.2307)
                     ( 1.00    -0.2187)  ( 1.00    -0.1192)  ( 0.00    -0.0791)
 ***** SPIN 2 *****
 orbitals (Q,E):
 ---------------
 A :18...28          ( 1.00    -0.3835)  ( 1.00    -0.3833)  ( 1.00    -0.3809)  ( 1.00    -0.3591)
                     ( 1.00    -0.3550)  ( 1.00    -0.3471)  ( 1.00    -0.2947)  ( 1.00    -0.2337)
                     ( 1.00    -0.2298)  ( 1.00    -0.2140)  ( 0.00    -0.1949)
  
 Spin polar: 2 (Spin_A minus Spin_B electrons)

 CYCLE    7
  SDIIS (wt  1.000):  0.0075 -0.0856  0.0147 -0.1160  0.1450  1.0344
  DIIS coefficients:  0.0075 -0.0856  0.0147 -0.1160  0.1450  1.0344
 SCF Error: norm([F,P])=      0.001113538862, max([F,P])=      0.000106200068
 ***** SPIN 1 *****
 orbitals (Q,E):
 ---------------
 A :20...30          ( 1.00    -0.3854)  ( 1.00    -0.3659)  ( 1.00    -0.3637)  ( 1.00    -0.3510)
                     ( 1.00    -0.3164)  ( 1.00    -0.2519)  ( 1.00    -0.2377)  ( 1.00    -0.2307)
                     ( 1.00    -0.2187)  ( 1.00    -0.1193)  ( 0.00    -0.0792)
 ***** SPIN 2 *****
 orbitals (Q,E):
 ---------------
 A :18...28          ( 1.00    -0.3835)  ( 1.00    -0.3834)  ( 1.00    -0.3809)  ( 1.00    -0.3591)
                     ( 1.00    -0.3550)  ( 1.00    -0.3471)  ( 1.00    -0.2948)  ( 1.00    -0.2338)
                     ( 1.00    -0.2299)  ( 1.00    -0.2141)  ( 0.00    -0.1949)
  
 Spin polar: 2 (Spin_A minus Spin_B electrons)

 CYCLE    8
  SDIIS (wt  1.000):  0.0228 -0.1094  0.0155 -0.1621  0.0087  0.7619  0.4625
  DIIS coefficients:  0.0228 -0.1094  0.0155 -0.1621  0.0087  0.7619  0.4625
 SCF Error: norm([F,P])=      0.000780451933, max([F,P])=      0.000073835164
 ***** SPIN 1 *****
 orbitals (Q,E):
 ---------------
 A :20...30          ( 1.00    -0.3854)  ( 1.00    -0.3659)  ( 1.00    -0.3637)  ( 1.00    -0.3510)
                     ( 1.00    -0.3164)  ( 1.00    -0.2519)  ( 1.00    -0.2377)  ( 1.00    -0.2307)
                     ( 1.00    -0.2187)  ( 1.00    -0.1193)  ( 0.00    -0.0791)
 ***** SPIN 2 *****
 orbitals (Q,E):
 ---------------
 A :18...28          ( 1.00    -0.3835)  ( 1.00    -0.3834)  ( 1.00    -0.3810)  ( 1.00    -0.3591)
                     ( 1.00    -0.3550)  ( 1.00    -0.3471)  ( 1.00    -0.2948)  ( 1.00    -0.2338)
                     ( 1.00    -0.2299)  ( 1.00    -0.2140)  ( 0.00    -0.1949)
  
 Spin polar: 2 (Spin_A minus Spin_B electrons)

 CYCLE    9
  SDIIS (wt  1.000):  0.0174 -0.0704  0.0119 -0.1123 -0.0271  0.4036  0.3846  0.3923
  DIIS coefficients:  0.0174 -0.0704  0.0119 -0.1123 -0.0271  0.4036  0.3846  0.3923
 SCF Error: norm([F,P])=      0.000426614824, max([F,P])=      0.000045940483
 ***** SPIN 1 *****
 orbitals (Q,E):
 ---------------
 A :20...30          ( 1.00    -0.3854)  ( 1.00    -0.3659)  ( 1.00    -0.3637)  ( 1.00    -0.3510)
                     ( 1.00    -0.3164)  ( 1.00    -0.2519)  ( 1.00    -0.2377)  ( 1.00    -0.2307)
                     ( 1.00    -0.2187)  ( 1.00    -0.1193)  ( 0.00    -0.0791)
 ***** SPIN 2 *****
 orbitals (Q,E):
 ---------------
 A :18...28          ( 1.00    -0.3835)  ( 1.00    -0.3834)  ( 1.00    -0.3810)  ( 1.00    -0.3591)
                     ( 1.00    -0.3550)  ( 1.00    -0.3471)  ( 1.00    -0.2947)  ( 1.00    -0.2338)
                     ( 1.00    -0.2299)  ( 1.00    -0.2140)  ( 0.00    -0.1949)
  
 Spin polar: 2 (Spin_A minus Spin_B electrons)

 CYCLE   10
  SDIIS (wt  1.000):  0.0070 -0.0228  0.0056 -0.0405 -0.0195  0.0944  0.1414  0.2583  0.5760
  DIIS coefficients:  0.0070 -0.0228  0.0056 -0.0405 -0.0195  0.0944  0.1414  0.2583  0.5760
 SCF Error: norm([F,P])=      0.000139002108, max([F,P])=      0.000013465526
 ***** SPIN 1 *****
 orbitals (Q,E):
 ---------------
 A :20...30          ( 1.00    -0.3854)  ( 1.00    -0.3659)  ( 1.00    -0.3637)  ( 1.00    -0.3510)
                     ( 1.00    -0.3164)  ( 1.00    -0.2519)  ( 1.00    -0.2377)  ( 1.00    -0.2307)
                     ( 1.00    -0.2187)  ( 1.00    -0.1193)  ( 0.00    -0.0791)
 ***** SPIN 2 *****
 orbitals (Q,E):
 ---------------
 A :18...28          ( 1.00    -0.3835)  ( 1.00    -0.3834)  ( 1.00    -0.3810)  ( 1.00    -0.3591)
                     ( 1.00    -0.3550)  ( 1.00    -0.3471)  ( 1.00    -0.2947)  ( 1.00    -0.2338)
                     ( 1.00    -0.2299)  ( 1.00    -0.2140)  ( 0.00    -0.1949)
  
 Spin polar: 2 (Spin_A minus Spin_B electrons)

 CYCLE   11
  SDIIS (wt  1.000):  0.0017 -0.0019  0.0021 -0.0063 -0.0076 -0.0113  0.0212  0.1038  0.3644  0.5339
  DIIS coefficients:  0.0017 -0.0019  0.0021 -0.0063 -0.0076 -0.0113  0.0212  0.1038  0.3644  0.5339
 SCF Error: norm([F,P])=      0.000066426484, max([F,P])=      0.000006331623
 ***** SPIN 1 *****
 orbitals (Q,E):
 ---------------
 A :20...30          ( 1.00    -0.3854)  ( 1.00    -0.3659)  ( 1.00    -0.3637)  ( 1.00    -0.3510)
                     ( 1.00    -0.3164)  ( 1.00    -0.2519)  ( 1.00    -0.2377)  ( 1.00    -0.2307)
                     ( 1.00    -0.2187)  ( 1.00    -0.1193)  ( 0.00    -0.0791)
 ***** SPIN 2 *****
 orbitals (Q,E):
 ---------------
 A :18...28          ( 1.00    -0.3835)  ( 1.00    -0.3834)  ( 1.00    -0.3810)  ( 1.00    -0.3591)
                     ( 1.00    -0.3550)  ( 1.00    -0.3471)  ( 1.00    -0.2947)  ( 1.00    -0.2338)
                     ( 1.00    -0.2299)  ( 1.00    -0.2140)  ( 0.00    -0.1949)
  
 Spin polar: 2 (Spin_A minus Spin_B electrons)

 CYCLE   12
  SDIIS (wt  1.000):  0.0024  0.0003  0.0030 -0.0008 -0.0217 -0.0131  0.0174  0.1160  0.3725  0.5240
  DIIS coefficients:  0.0024  0.0003  0.0030 -0.0008 -0.0217 -0.0131  0.0174  0.1160  0.3725  0.5240
 SCF Error: norm([F,P])=      0.000032050850, max([F,P])=      0.000002478304
 ***** SPIN 1 *****
 orbitals (Q,E):
 ---------------
 A :20...30          ( 1.00    -0.3854)  ( 1.00    -0.3659)  ( 1.00    -0.3637)  ( 1.00    -0.3510)
                     ( 1.00    -0.3164)  ( 1.00    -0.2519)  ( 1.00    -0.2377)  ( 1.00    -0.2307)
                     ( 1.00    -0.2187)  ( 1.00    -0.1193)  ( 0.00    -0.0791)
 ***** SPIN 2 *****
 orbitals (Q,E):
 ---------------
 A :18...28          ( 1.00    -0.3836)  ( 1.00    -0.3834)  ( 1.00    -0.3810)  ( 1.00    -0.3591)
                     ( 1.00    -0.3550)  ( 1.00    -0.3471)  ( 1.00    -0.2947)  ( 1.00    -0.2338)
                     ( 1.00    -0.2299)  ( 1.00    -0.2140)  ( 0.00    -0.1949)
  
 Spin polar: 2 (Spin_A minus Spin_B electrons)

 CYCLE   13
  SDIIS (wt  1.000): -0.0002  0.0008  0.0008 -0.0006 -0.0050 -0.0108 -0.0238  0.0601  0.2723  0.7063
  DIIS coefficients: -0.0002  0.0008  0.0008 -0.0006 -0.0050 -0.0108 -0.0238  0.0601  0.2723  0.7063
 SCF Error: norm([F,P])=      0.000009787010, max([F,P])=      0.000000941882
 ***** SPIN 1 *****
 orbitals (Q,E):
 ---------------
 A :20...30          ( 1.00    -0.3854)  ( 1.00    -0.3659)  ( 1.00    -0.3637)  ( 1.00    -0.3510)
                     ( 1.00    -0.3164)  ( 1.00    -0.2519)  ( 1.00    -0.2377)  ( 1.00    -0.2307)
                     ( 1.00    -0.2187)  ( 1.00    -0.1193)  ( 0.00    -0.0791)
 ***** SPIN 2 *****
 orbitals (Q,E):
 ---------------
 A :18...28          ( 1.00    -0.3835)  ( 1.00    -0.3834)  ( 1.00    -0.3810)  ( 1.00    -0.3591)
                     ( 1.00    -0.3550)  ( 1.00    -0.3471)  ( 1.00    -0.2947)  ( 1.00    -0.2338)
[truncated: 1,012,754 more chars]
