# Supplementary material for: Spin Orbit Coupling in Orthogonal Charge Transfer States: (TD-)DFT of Pyrene - Dimethylaniline
Source: Preprints.org preprint supplement (doi:10.20944/preprints202112.0109.v2), 2021-12-16
Supplement: Supplementary file 3 [file supplementary › Supporting INFO-14-12-2021/Coordinate files/ACETONE-B/PBE/S0/acetone-S0-PBE.mol]

acetone-S0-PBE
SCM ADF package: www.scm.com

 10  9  0  0  0  0  0  0  0  0999 V2000
   -0.0000   -0.0000   -0.6206 C   0  0  0  0  0  0  0  0  0  0  0  0
   -1.2884    0.0000    0.1782 C   0  0  0  0  0  0  0  0  0  0  0  0
    1.2884    0.0000    0.1782 C   0  0  0  0  0  0  0  0  0  0  0  0
   -0.0000   -0.0000   -1.8402 O   0  0  0  0  0  0  0  0  0  0  0  0
    1.3308    0.8817    0.8349 H   0  0  0  0  0  0  0  0  0  0  0  0
    2.1500    0.0000   -0.4968 H   0  0  0  0  0  0  0  0  0  0  0  0
    1.3308   -0.8817    0.8349 H   0  0  0  0  0  0  0  0  0  0  0  0
   -1.3308   -0.8816    0.8349 H   0  0  0  0  0  0  0  0  0  0  0  0
   -1.3308    0.8817    0.8349 H   0  0  0  0  0  0  0  0  0  0  0  0
   -2.1500   -0.0000   -0.4968 H   0  0  0  0  0  0  0  0  0  0  0  0
  1  3  1  0
  1  2  1  0
  3  6  1  0
  2 10  1  0
  2  9  1  0
  2  8  1  0
  3  5  1  0
  3  7  1  0
  1  4  2  0
M  END
