# Supplementary material for: Spin Orbit Coupling in Orthogonal Charge Transfer States: (TD-)DFT of Pyrene - Dimethylaniline
Source: Preprints.org preprint supplement (doi:10.20944/preprints202112.0109.v2), 2021-12-16
Supplement: Supplementary file 3 [file supplementary › Supporting INFO-14-12-2021/Coordinate files/ACETONE-B/PBE/S0/acetone-S0.out]

 *******************************************************************************
 *                                                                             *
 *  -------------------------------------                                      *
 *   Amsterdam Density Functional  (ADF)         2017                          *
 *  -------------------------------------                                      *
 *                                               r58813 2017-04-12             *
 *                                                                             *
 *                                                                             *
 *                            =====================                            *
 *                            |                   |                            *
 *                            |     D I R A C     |                            *
 *                            |                   |                            *
 *                            =====================                            *
 *                                                                             *
 *                                                                             *
 *   Online information and documentation:  https://www.scm.com/support/       *
 *   E-mail:  support@scm.com   info@scm.com                                   *
 *                                                                             *
 *   Scientific publications using ADF results must be properly referenced     *
 *   See the User Manuals (or the web site) for recommended citations          *
 *   The terms and conditions of the End User License Agreement apply to       *
 *   the use of ADF, https://www.scm.com/license-terms/                        *
 *                                                                             *
 **********************  x86_64_linux_intel / intelmpi  ************************
 
 Licensed to: SURF-SARA, Comp. & Networking Services / Amsterdam / NL
 SCM User ID: u7409
  
 DIRAC 2017  RunTime: Dec08-2020 02:12:43  Nodes: 1  Procs: 1

 Temporary files are created in /scratch/kid_0.ozbssX

1
 HYDROGEN ATOM RELATIVISTIC, Point Nuc, A and c from libtc   
 N J RN H ZN XION ANUC CLIGHT
 5000    1100.00000000197.36710137  1.00000000  0.00000000    1.007825  0.1370360E+03
  PH   PHI     EPS        DEL        DELRVR
  0.30  0.30     2500.00  0.00001000  0.00001000
 IDIRC  NC1  NDEBU NPRIN  IPUN IRCOR IWCOR
   1   300     0     0     0     0     0
   XALPHA      XLATTER      RNUC
  0.70000000  0.00000000  0.00000000 Point Charge
   XN   XL   XJ      XE          XZ      XDELL
  1.0  0.0  0.5      -1.000       1.000     0.00000
 ICORP=  0  NPCL=  0  DEMP=0.00  PEPS=0.000000
 R(1)=  0.1000000E-08 D=  0.1005080E+01 RNUC=  0.0000000E+00
 converged at cycle   32  DENSITY AVERAGING    0.2400
  MAXIMUM ERROR IN R.V(R) IS   0.79874357E-05
 Q,EY,EV,EZ,ESUM,ETOT,RHO  0.100000E+01 -0.266614E+00 -0.619969E+00 -0.910779E+00 -0.203940E+00 -0.415998E+00  0.337036E-17


 DIRAC CALCULATION
1                    HYDROGEN ATOM RELATIVISTIC, Point Nuc, A and c from libtc


 EXCHANGE COEFFICIENT=  0.7000000           TAIL CORRECTION=  0.           NUCLEAR RADIUS=  0.000E+00
0                       ORBITAL    N    L    J     ELECTRONS     EIGENVALUE                DELTA OF EIGENV.

                          1S1/2  1.0  0.0  0.5     1.000       -0.2039397E+00                 0.2720093E-06


                                        NUCLEAR CHARGE=    1.000000
                            INTEGRAL OF CHARGE DENSITY=    1.000000
                           SUM OF THE ORBITAL ENERGIES=     -0.2039
                                          TOTAL ENERGY=     -0.4160
                                        KINETIC ENERGY=      0.4160
                             NUCLEAR ATTRACTION ENERGY=     -0.9108
                             ELECTRON REPULSION ENERGY=      0.2787
                                       EXCHANGE ENERGY=     -0.2000

 *******************************************************************************

                             D I R A C   E X I T
 NORMAL TERMINATION


 =================
 Timing Statistics
 =================
  
 Total Used :                     CPU=        0.05      System=        0.00     Elapsed=        0.06

 Calls  Section                     ( Mean, Percentage )
 ---------------------------------------------------------------------------------------------------
     2  ><      ................      0.00    0.02             0.00    0.00             0.00    0.01
     1  EXIT PROCEDURE .........      0.05   99.98             0.00  100.00             0.06   99.99


 Currently Open Files (EXIT00)
 ====================

 Unit    Access Format  Status   Type       Ident (file)
 -------------------------------------------------------
   3      SEQ    FORM   TRANSP  NORMAL      LOGFILE
                                          ( logfile )


 Buffered I/O statistics
 =======================
 Memory available:                     67108864
 Number of records fitting in memory:     16131
 Input : 100.0% of                            0  *4k bytes
 Output: 100.0% of                            0  *4k bytes
 Records from serial files evicted:           0
                    others evicted:           0
 Hash table lookups:          0 with          0 conflicts (100.00%)
NORMAL TERMINATION

Create H   file=TZ2P-H
XC
  GGA PBE
End
relativistic ZORA
HartreeFock
Corepotentials t12.rel
End Input

 *******************************************************************************
 *                                                                             *
 *  -------------------------------------                                      *
 *   Amsterdam Density Functional  (ADF)         2017                          *
 *  -------------------------------------                                      *
 *                                               r58813 2017-04-12             *
 *                                                                             *
 *                                                                             *
 *                              =================                              *
 *                              |               |                              *
 *                              |     A D F     |                              *
 *                              |               |                              *
 *                              =================                              *
 *                                                                             *
 *                                                                             *
 *   Online information and documentation:  https://www.scm.com/support/       *
 *   E-mail:  support@scm.com   info@scm.com                                   *
 *                                                                             *
 *   Scientific publications using ADF results must be properly referenced     *
 *   See the User Manuals (or the web site) for recommended citations          *
 *   The terms and conditions of the End User License Agreement apply to       *
 *   the use of ADF, https://www.scm.com/license-terms/                        *
 *                                                                             *
 **********************  x86_64_linux_intel / intelmpi  ************************
 
 Licensed to: SURF-SARA, Comp. & Networking Services / Amsterdam / NL
 SCM User ID: u7409
  
 ADF 2017  RunTime: Dec08-2020 02:12:44  Nodes: 1  Procs: 1

 Temporary files are created in /scratch/kid_0.i1Qq3P

 Hydrogen (TZ2P)


 ===========================
 A T T A C H E D   F I L E S
 ===========================
  
 CREATE - Data File:    TZ2P-H
                        Hydrogen (TZ2P)
 Core Potentials:
         file : t12.rel


 ===============================
 M O D E L   P A R A M E T E R S
 ===============================
  
 DENSITY FUNCTIONAL POTENTIAL (scf)
    LDA:                               PW92                                    == Not Default ==
    Gradient Corrections:              PBEc PBEx                               == Not Default ==

 SPIN  (restricted / unrestr.)
    Molecule:                          Restricted                               

 OTHER ASPECTS
    Relativistic Corrections:          scalar (ZORA,MAPA)                      == Not Default ==

    Nuclear Charge Density Model:      Point Charge Nuclei                      
    Core Treatment:                    Frozen Orbital(s)                        

    Hyperfine or Zeeman Interaction:   ---                                      


 =====================================
 S Y M M E T R Y ,   E L E C T R O N S
 =====================================
  
 Symmetry: ATOM

 Irreducible Representations, including subspecies
 -------------------------------------------------
 S
 P:x  P:y  P:z
 D:z2  D:x2-y2  D:xy  D:xz  D:yz
 F:z3  F:z  F:xyz  F:z2x  F:z2y  F:x  F:y


 Configuration of Valence Electrons
 ==================================

          Occupation Numbers
          -------------------------------------------------
 S        1
 P        0
 D        0
 F        0
          -------------------------------------------------

 Total:   1

 Net Charge: 0 (Nuclei minus Electrons)

 Preset values for MO occupations will be applied through SCF cycle no. 1000000
 Thereafter, the program will assign electrons to MOs that are spatially
 similar to the occupied MOs in a "reference" cycle ("KeepOrbitals").
 The reference cycle is always the PREVIOUS cycle: it will evolve with
 the SCF procedure.


 ================================
 (Slater-type)  F U N C T I O N S  ***  (Basis and Fit)  ***
 ================================
  

 Atom Type    1  (H)
 ==============

 Valence Basis Sets:   5
 -----------------------
   1 S    0.690000
   1 S    0.920000
   1 S    1.580000
   2 P    1.250000
   3 D    2.500000


 BAS: List of all Elementary Cartesian Basis Functions
 =====================================================

 The numbering in the list below (to the right of the function characteristics) is referred
 to in print-outs of MO eigenvectors and Mulliken populations in the BAS representation
 (as contrasted to the SFO representation).

 Notes:
 1. The functions are characterized by a polynomial prefactor (powers of x,y,z and r) and
    an exponential decay factor alpha.
 2. Since the basis sets are specific for an atom TYPE, the individual functions occur on
    all atoms of that type.
 3. The word 'Core' in the left margin signals that it is a Core Function (CF) : not a
    degree of freedom in the valence set, but only used to ensure orthogonalization of
    the other valence basis functions on the frozen Core Orbitals.


 (power of) X  Y  Z  R     Alpha  on Atom
            ==========     =====     ==========

 H                                    1
                                  ---------------------------------------------------------------------------
            0  0  0  0     0.690      1
            0  0  0  0     0.920      2
            0  0  0  0     1.580      3
            1  0  0  0     1.250      4
            0  1  0  0     1.250      5
            0  0  1  0     1.250      6
            2  0  0  0     2.500      7
            1  1  0  0     2.500      8
            1  0  1  0     2.500      9
            0  2  0  0     2.500     10
            0  1  1  0     2.500     11
            0  0  2  0     2.500     12

 Total number of charge fitting functions (nprimf)        50
 Total number of Cartesian basis functions (naos)         12
 Total number of Cartesian core functions  (ncos)          0


 BAS: List of all Elementary Cartesian Basis Functions
 =====================================================

 The numbering in the list below (to the right of the function characteristics) is referred
 to in print-outs of MO eigenvectors and Mulliken populations in the BAS representation
 (as contrasted to the SFO representation).

 Notes:
 1. The functions are characterized by a polynomial prefactor (powers of x,y,z and r) and
    an exponential decay factor alpha.
 2. Since the basis sets are specific for an atom TYPE, the individual functions occur on
    all atoms of that type.
 3. The word 'Core' in the left margin signals that it is a Core Function (CF) : not a
    degree of freedom in the valence set, but only used to ensure orthogonalization of
    the other valence basis functions on the frozen Core Orbitals.


 (power of) X  Y  Z  R     Alpha  on Atom
            ==========     =====     ==========

 H                                    1
                                  ---------------------------------------------------------------------------
            0  0  0  0     0.690      1
            0  0  0  0     0.920      2
            0  0  0  0     1.580      3
            1  0  0  0     1.250      4
            0  1  0  0     1.250      5
            0  0  1  0     1.250      6
            2  0  0  0     2.500      7
            1  1  0  0     2.500      8
            1  0  1  0     2.500      9
            0  2  0  0     2.500     10
            0  1  1  0     2.500     11
            0  0  2  0     2.500     12
1
 ***************************************************************************************************


                                              ***********************
                                              *  T E C H N I C A L  *
                                              ***********************
  


 =============================================================
 P A R A L L E L I Z A T I O N  and  V E C T O R I Z A T I O N
 =============================================================
  
 Nr of parallel processes:                                1
 Maximum vector length in NumInt loops:                 128

 IO buffersize (Mb):                                     64.000000


 =====================
 S C F   U P D A T E S
 =====================
  
 Max. nr. of cycles:                               300
 Convergence criterion:                              0.0000000100
   secondary criterion:                              0.0000000100

 Mix parameter (when DIIS does not apply):           0.2000000000
 Special mix parameter for the first cycle:          1.0000000000
 Mixed ADIIS+DIIS will be used
    Max number of expansion vectors:                10
    Pure ADIIS when Max([F,P]) is above              0.1000000000
    Pure DIIS when Max([F,P]) is below               0.0010000000
 Automatic ElectronSmearing (in case of problematic SCF convergence) disabled


 =================
 P R E C I S I O N  ***  (General: NumInt, NeglectFunctionTails, ...)  ***
 =================
  

 NumInt:           Target precision:                12.0000000000
 -------           Initial precision:               10.0000000000
                   Min. precision (optimization):   10.0000000000

 Neglect Functions:          Basis functions:        0.1000000000E-13
 ------------------          Fit functions:          0.1000000000E-13


 ===========================
 L I N E A R   S C A L I N G
 ===========================
  

 Cut-off radii density fit:                        0.1000000000E-97
 Overlap cut-off criterion AO matrix elements:     0.1000000000E-97
 Cut-offs for Coulomb potential and fitted density:0.1000000000E-97
 Cut-off criterion for Coulomb multipole terms:    0.1000000000E-97
 Progressive Convergence parameter:                 0.000000000    
1
 ***************************************************************************************************


                                            ***************************
                                            *  C O M P U T A T I O N  *
                                            ***************************
  

 Number of elements of the density matrix on this node (used, total):        78        78


 ===========================================
 Numerical Integration : Fuzzy Cells (Becke)
 ===========================================
  
 Becke grid quality: VERYGOOD       
  
 Lebedev angular grid order:             min:  13 max:  41
 Nr. of radial points:                   min:  64 max:  64

 Total nr. of points:         64
 Nr. of blocks:                1
 Block length:                64
 Nr. of dummy points:          0


 Test of Precision of the Numerical Integration Grid
 ===================================================

 Integral of the Total Core Density:                   0.00000000000000


 ========================
 Density Fitting (zlmFit)
 ========================
  
 ZlmFit Fit Quality: VERYGOOD       
  
 Max L-expansion:                        min:   0 max:   0
 Nr. of radial interpolation points:     min: 130 max: 130


 =====
 S C F  ***  ScaSCF  ***
 =====
  

 CYCLE    1
 SCF Error: norm([F,P])=      0.000000000000, max([F,P])=      0.000000000000
 orbitals (Q,E):
 ---------------
 S :1...3            ( 1.00    -0.5000)  ( 0.00    -0.0900)  ( 0.00     1.2936)
 P :1...1            ( 0.00     0.1562)
 D :1...1            ( 0.00     2.2914)

 CYCLE    2
 SCF Error: norm([F,P])=      0.031550472103, max([F,P])=      0.030121296888
 orbitals (Q,E):
 ---------------
 S :1...2            ( 1.00    -0.2218)  ( 0.00     0.1019)
 P :1...1            ( 0.00     0.4189)
 D :1...1            ( 0.00     2.5824)

 CYCLE    3
  SDIIS (wt  0.000):  0.1996  0.8004
 A-DIIS (wt  1.000):  0.0000  1.0000
  DIIS coefficients:  0.0000  1.0000
 SCF Error: norm([F,P])=      0.008620363195, max([F,P])=      0.008345718591
 orbitals (Q,E):
 ---------------
 S :1...2            ( 1.00    -0.2422)  ( 0.00     0.0889)
 P :1...1            ( 0.00     0.4024)
 D :1...1            ( 0.00     2.5619)

 CYCLE    4
  SDIIS (wt  0.993):  0.1666  0.8334
 A-DIIS (wt  0.007):  0.0000  1.0000
  DIIS coefficients:  0.1654  0.8346
 SCF Error: norm([F,P])=      0.001733197582, max([F,P])=      0.001719525172
 orbitals (Q,E):
 ---------------
 S :1...2            ( 1.00    -0.2386)  ( 0.00     0.0908)
 P :1...1            ( 0.00     0.4054)
 D :1...1            ( 0.00     2.5657)

 CYCLE    5
  SDIIS (wt  1.000):  0.0236  0.9764
  DIIS coefficients:  0.0236  0.9764
 SCF Error: norm([F,P])=      0.000043722685, max([F,P])=      0.000039815539
 orbitals (Q,E):
 ---------------
 S :1...2            ( 1.00    -0.2386)  ( 0.00     0.0908)
 P :1...1            ( 0.00     0.4054)
 D :1...1            ( 0.00     2.5656)

 CYCLE    6
  SDIIS (wt  1.000): -0.0578  1.0578
  DIIS coefficients: -0.0578  1.0578
 SCF Error: norm([F,P])=      0.000002387703, max([F,P])=      0.000002161666
 orbitals (Q,E):
 ---------------
 S :1...2            ( 1.00    -0.2386)  ( 0.00     0.0908)
 P :1...1            ( 0.00     0.4054)
 D :1...1            ( 0.00     2.5656)

 CYCLE    7
  SDIIS (wt  1.000): -0.0032  1.0032
  DIIS coefficients: -0.0032  1.0032
 SCF Error: norm([F,P])=      0.000000007756, max([F,P])=      0.000000007262
 orbitals (Q,E):
 ---------------
 S :1...2            ( 1.00    -0.2386)  ( 0.00     0.0908)
 P :1...1            ( 0.00     0.4054)
 D :1...1            ( 0.00     2.5656)

 SCF CONVERGED

 CYCLE    8
1
 ***************************************************************************************************


                                                *******************
                                                *  R E S U L T S  *
                                                *******************
  
  
 Hartree-Fock exchange energy:  -0.144886863649891     
 *** Setting up for NEW gradients in Focky
 *** Using FIT density in Focky

 Scaled ZORA Orbital Energies, per Irrep and Spin:
 =================================================
                        Occup              E (au)              E (eV)       Diff (eV) with prev. cycle
                        -----      --------------------        ------       --------------------------
 S
               1        1.000     -0.23862975420190E+00        -6.493               7.48E-09
               2        0.000      0.90763523721241E-01         2.470
               3        0.000      0.15217347450008E+01        41.409
 P
               1        0.000      0.40536414462565E+00        11.031
 D
               1        0.000      0.25655939238649E+01        69.813


 Partially Occupied:
               1 S                -0.23862975420190E+00
  
 LUMO :        2 S                 0.90763523721241E-01
  


 Orbital Energies, all Irreps
 ========================================

 Irrep        no.  (spin)   Occup              E (au)                E (eV)
 ---------------------------------------------------------------------------
 S             1             1.00       -0.23862975420190E+00        -6.4934
 S             2             0.00        0.90763523721241E-01         2.4698
 P             1             0.00        0.40536414462565E+00        11.0305
 S             3             0.00        0.15217347450008E+01        41.4085
 D             1             0.00        0.25655939238649E+01        69.8134


 All Electron Calculation, thus no Orbital Energies of the Core Orbitals are calculated


 =======================================
 M U L L I K E N   P O P U L A T I O N S
 =======================================
  
 The survey below gives for each atom:
 a) the total charge (Z minus electrons)
 b) the net spin polarization (nr of electrons spin-A minus spin-B)
 c) for each spin the atomic electron valence density (integrated) per L-value.

 Atom              Charge    Spin density          S         P         D         F
 ----              ------    ------------       ------    ------    ------    ------
 1 H               0.0000                       1.0000    0.0000    0.0000    0.0000

 Populations of individual BAS functions
 ----------------------------------------
 1 H            0.2107  0.6786  0.1108  0.0000  0.0000  0.0000  0.0000  0.0000  0.0000  0.0000
                0.0000  0.0000

 Gross Charges per Atom (Z minus electrons)
 ==========================================
             0.0000
 Net Total:  0.00000000


 =======================================================================
 Electrostatic potential at the Nuclei due to electrons and other nuclei
 =======================================================================
  
         Atom                  Potential
         ----                  ---------
     1)   H                   0.94465291
 
 
 ========================
 No memory problems found
 ========================
 
 Maximum number of active allocate calls:         382
 
 *******************************************************************************

                             A D F   E X I T
 NORMAL TERMINATION


 =================
 Timing Statistics
 =================
  
 Total Used :                     CPU=        0.22      System=        0.02     Elapsed=        0.51

 Calls  Section                     ( Mean, Percentage )
 ---------------------------------------------------------------------------------------------------
     3  ><      ................      0.00    0.32             0.00    0.07             0.00    0.57
     1  INIT    ................      0.01    4.41             0.01   87.34             0.26   50.81
     1  GEOMET  ................      0.01    4.07             0.00   12.59             0.02    3.29
     1  INPUTA  ................      0.00    0.63             0.00    0.00             0.00    0.36
     1  MAINSY  ................      0.01    2.75             0.00    0.00             0.01    2.10
     1  SYMFIT  ................      0.00    0.38             0.00    0.00             0.00    0.16
     1  CORORT  ................      0.00    0.16             0.00    0.00             0.00    0.31
     1  SYMORB  ................      0.00    0.31             0.00    0.00             0.00    0.13
     1  FITINT  ................      0.01    2.89             0.00    0.00             0.01    1.52
     1  CLSMAT  ................      0.00    0.15             0.00    0.00             0.00    0.34
     1  ORTHON  ................      0.00    0.54             0.00    0.00             0.00    0.45
     1  GENPT   ................      0.01    3.00             0.00    0.00             0.01    1.69
     1  PTBAS   ................      0.00    1.58             0.00    0.00             0.00    0.92
     8  FOCKY   ................      0.02   60.45             0.00    0.00             0.02   26.41
     8  FOCKTR  ................      0.00    1.71             0.00    0.00             0.00    0.72
     8  SDIIS   ................      0.00    3.91             0.00    0.00             0.00    4.02
     1  COREPS  ................      0.01    5.32             0.00    0.00             0.01    2.23
     1  POPAN   ................      0.00    1.28             0.00    0.00             0.00    0.79
     1  DEBYE   ................      0.00    0.19             0.00    0.00             0.00    0.29
     1  EXIT PROCEDURE .........      0.01    5.95             0.00    0.00             0.01    2.89


 Currently Open Files (EXIT00)
 ====================

 Unit    Access Format  Status   Type       Ident (file)
 -------------------------------------------------------
   3      SEQ    FORM   TRANSP  NORMAL      LOGFILE
                                          ( logfile )


 Buffered I/O statistics
 =======================
 Memory available:                     67108864
 Number of records fitting in memory:     16131
 Input :   0.2% of                        19554  *4k bytes
 Output:  17.6% of                         1157  *4k bytes
 Records from serial files evicted:           0
                    others evicted:           0
 Hash table lookups:      50265 with          0 conflicts (  0.00%)

 ***************************************************************************************************
 (LOGFILE)
 <Dec08-2020> <02:12:43>  DIRAC 2017  RunTime: Dec08-2020 02:12:43  Nodes: 1  Procs: 1
 <Dec08-2020> <02:12:43>  NORMAL TERMINATION
 <Dec08-2020> <02:12:43>  END
 <Dec08-2020> <02:12:44>  ADF 2017  RunTime: Dec08-2020 02:12:44  Nodes: 1  Procs: 1
 <Dec08-2020> <02:12:44>  Hydrogen (TZ2P)
 <Dec08-2020> <02:12:44>  RunType   : CREATE
 <Dec08-2020> <02:12:44>  Net Charge: 0 (Nuclei minus Electrons)
 <Dec08-2020> <02:12:44>  Symmetry  : ATOM
  Coordinates
    Atom         X           Y           Z   (Angstrom)
    1.H         0.000000    0.000000    0.000000
 <Dec08-2020> <02:12:44>  >>>> CORORT
 <Dec08-2020> <02:12:44>  >>>> FITINT
 <Dec08-2020> <02:12:44>  >>>> CLSMAT
 <Dec08-2020> <02:12:44>  >>>> ORTHON
 <Dec08-2020> <02:12:44>  >>>> GENPT
 <Dec08-2020> <02:12:44>  Block Length=  64
 <Dec08-2020> <02:12:44>  >>>> PTBAS
 <Dec08-2020> <02:12:44>  >>>> CYCLE
 <Dec08-2020> <02:12:44>              |Error|         MaxErr       Wt(A-DIIS)
 <Dec08-2020> <02:12:44>      1      0.00000000      0.00000000
 <Dec08-2020> <02:12:44>      2      0.03155047      0.03012130
 <Dec08-2020> <02:12:44>      3      0.00862036      0.00834572    100.0
 <Dec08-2020> <02:12:44>      4      0.00173320      0.00171953      0.7
 <Dec08-2020> <02:12:44>      5      0.00004372      0.00003982      0.0
 <Dec08-2020> <02:12:44>      6      0.00000239      0.00000216      0.0
 <Dec08-2020> <02:12:44>      7      0.00000001      0.00000001      0.0
 <Dec08-2020> <02:12:44>  SCF converged
 <Dec08-2020> <02:12:44>      8      0.00000000      0.00000000      0.0
 <Dec08-2020> <02:12:44>  >>>> POPAN
 <Dec08-2020> <02:12:44>  >>>> DEBYE
 <Dec08-2020> <02:12:44>  NORMAL TERMINATION
 <Dec08-2020> <02:12:44>  END
NORMAL TERMINATION

 *******************************************************************************
 *                                                                             *
 *  -------------------------------------                                      *
 *   Amsterdam Density Functional  (ADF)         2017                          *
 *  -------------------------------------                                      *
 *                                               r58813 2017-04-12             *
 *                                                                             *
 *                                                                             *
 *                            =====================                            *
 *                            |                   |                            *
 *                            |     D I R A C     |                            *
 *                            |                   |                            *
 *                            =====================                            *
 *                                                                             *
 *                                                                             *
 *   Online information and documentation:  https://www.scm.com/support/       *
 *   E-mail:  support@scm.com   info@scm.com                                   *
 *                                                                             *
 *   Scientific publications using ADF results must be properly referenced     *
 *   See the User Manuals (or the web site) for recommended citations          *
 *   The terms and conditions of the End User License Agreement apply to       *
 *   the use of ADF, https://www.scm.com/license-terms/                        *
 *                                                                             *
 **********************  x86_64_linux_intel / intelmpi  ************************
 
 Licensed to: SURF-SARA, Comp. & Networking Services / Amsterdam / NL
 SCM User ID: u7409
  
 DIRAC 2017  RunTime: Dec08-2020 02:12:45  Nodes: 1  Procs: 1

 Temporary files are created in /scratch/kid_0.uHGY2p

1
 OXYGEN ATOM 1s CORE RELATIVISTIC, Point Nuc, A and c from li
 N J RN H ZN XION ANUC CLIGHT
 5000    4100.00000000197.36710137  8.00000000  0.00000000   15.994914  0.1370360E+03
  PH   PHI     EPS        DEL        DELRVR
  0.30  0.30     2500.00  0.00001000  0.00001000
 IDIRC  NC1  NDEBU NPRIN  IPUN IRCOR IWCOR
   1   300     0     0     0     0     1
   XALPHA      XLATTER      RNUC
  0.70000000  0.00000000  0.00000000 Point Charge
   XN   XL   XJ      XE          XZ      XDELL
  1.0  0.0  0.5      -5.000       2.000     0.00000
  2.0  0.0  0.5      -1.000       2.000     0.00000
  2.0  1.0  0.5      -1.000       2.000     0.00000
  2.0  1.0  1.5      -1.000       2.000     0.00000
 ICORP=  0  NPCL=  0  DEMP=0.00  PEPS=0.000000
 R(1)=  0.1000000E-08 D=  0.1005080E+01 RNUC=  0.0000000E+00
 converged at cycle   28  DENSITY AVERAGING    0.2400
  MAXIMUM ERROR IN R.V(R) IS   0.81125670E-05
 Q,EY,EV,EZ,ESUM,ETOT,RHO  0.800000E+01 -0.101247E+02 -0.114961E+03 -0.177573E+03 -0.405053E+02 -0.743427E+02  0.414766E-14


 DIRAC CALCULATION
1                    OXYGEN ATOM 1s CORE RELATIVISTIC, Point Nuc, A and c from libtc


 EXCHANGE COEFFICIENT=  0.7000000           TAIL CORRECTION=  0.           NUCLEAR RADIUS=  0.000E+00
0                       ORBITAL    N    L    J     ELECTRONS     EIGENVALUE                DELTA OF EIGENV.

                          1S1/2  1.0  0.0  0.5     2.000       -0.1880014E+02                 0.7264359E-06
                          2S1/2  2.0  0.0  0.5     2.000       -0.8412236E+00                 0.5932752E-05
                          2P1/2  2.0  1.0  0.5     2.000       -0.3063203E+00                 0.5998471E-05
                          2P3/2  2.0  1.0  1.5     2.000       -0.3049609E+00                 0.5986971E-05


                                        NUCLEAR CHARGE=    8.000000
                            INTEGRAL OF CHARGE DENSITY=    8.000000
                           SUM OF THE ORBITAL ENERGIES=    -40.5053
                                          TOTAL ENERGY=    -74.3427
                                        KINETIC ENERGY=     74.4552
                             NUCLEAR ATTRACTION ENERGY=   -177.5730
                             ELECTRON REPULSION ENERGY=     36.3686
                                       EXCHANGE ENERGY=     -7.5935

 *******************************************************************************

                             D I R A C   E X I T
 NORMAL TERMINATION


 =================
 Timing Statistics
 =================
  
 Total Used :                     CPU=        0.08      System=        0.00     Elapsed=        0.09

 Calls  Section                     ( Mean, Percentage )
 ---------------------------------------------------------------------------------------------------
     2  ><      ................      0.00    0.01             0.00    0.00             0.00    0.01
     1  EXIT PROCEDURE .........      0.08   99.99             0.00  100.00             0.09   99.99


 Currently Open Files (EXIT00)
 ====================

 Unit    Access Format  Status   Type       Ident (file)
 -------------------------------------------------------
   3      SEQ    FORM   TRANSP  NORMAL      LOGFILE
                                          ( logfile )


 Buffered I/O statistics
 =======================
 Memory available:                     67108864
 Number of records fitting in memory:     16131
 Input : 100.0% of                            0  *4k bytes
 Output: 100.0% of                            0  *4k bytes
 Records from serial files evicted:           0
                    others evicted:           0
 Hash table lookups:          0 with          0 conflicts (100.00%)
NORMAL TERMINATION

Create O   file=TZ2P-O.1s
XC
  GGA PBE
End
relativistic ZORA
HartreeFock
Corepotentials t12.rel
End Input

 *******************************************************************************
 *                                                                             *
 *  -------------------------------------                                      *
 *   Amsterdam Density Functional  (ADF)         2017                          *
 *  -------------------------------------                                      *
 *                                               r58813 2017-04-12             *
 *                                                                             *
 *                                                                             *
 *                              =================                              *
 *                              |               |                              *
 *                              |     A D F     |                              *
 *                              |               |                              *
 *                              =================                              *
 *                                                                             *
 *                                                                             *
 *   Online information and documentation:  https://www.scm.com/support/       *
 *   E-mail:  support@scm.com   info@scm.com                                   *
 *                                                                             *
 *   Scientific publications using ADF results must be properly referenced     *
 *   See the User Manuals (or the web site) for recommended citations          *
 *   The terms and conditions of the End User License Agreement apply to       *
 *   the use of ADF, https://www.scm.com/license-terms/                        *
 *                                                                             *
 **********************  x86_64_linux_intel / intelmpi  ************************
 
 Licensed to: SURF-SARA, Comp. & Networking Services / Amsterdam / NL
 SCM User ID: u7409
  
 ADF 2017  RunTime: Dec08-2020 02:12:45  Nodes: 1  Procs: 1

 Temporary files are created in /scratch/kid_0.nDmw5B

 Oxygen (TZ2P, 1s frozen)


 ===========================
 A T T A C H E D   F I L E S
 ===========================
  
 CREATE - Data File:    TZ2P-O.1s
                        Oxygen (TZ2P, 1s frozen)
 Core Potentials:
         file : t12.rel


 ===============================
 M O D E L   P A R A M E T E R S
 ===============================
  
 DENSITY FUNCTIONAL POTENTIAL (scf)
    LDA:                               PW92                                    == Not Default ==
    Gradient Corrections:              PBEc PBEx                               == Not Default ==

 SPIN  (restricted / unrestr.)
    Molecule:                          Restricted                               

 OTHER ASPECTS
    Relativistic Corrections:          scalar (ZORA,MAPA)                      == Not Default ==

    Nuclear Charge Density Model:      Point Charge Nuclei                      
    Core Treatment:                    Frozen Orbital(s)                        

    Hyperfine or Zeeman Interaction:   ---                                      


 =====================================
 S Y M M E T R Y ,   E L E C T R O N S
 =====================================
  
 Symmetry: ATOM

 Irreducible Representations, including subspecies
 -------------------------------------------------
 S
 P:x  P:y  P:z
 D:z2  D:x2-y2  D:xy  D:xz  D:yz
 F:z3  F:z  F:xyz  F:z2x  F:z2y  F:x  F:y


 Configuration of Valence Electrons
 ==================================

          Occupation Numbers
          -------------------------------------------------
 S        2
 P        4
 D        0
 F        0
          -------------------------------------------------

 Total:   6

 Net Charge: 0 (Nuclei minus Electrons)

 Preset values for MO occupations will be applied through SCF cycle no. 1000000
 Thereafter, the program will assign electrons to MOs that are spatially
 similar to the occupied MOs in a "reference" cycle ("KeepOrbitals").
 The reference cycle is always the PREVIOUS cycle: it will evolve with
 the SCF procedure.


 ================================
 (Slater-type)  F U N C T I O N S  ***  (Basis and Fit)  ***
 ================================
  

 Atom Type    1  (O)
 ==============

 Valence Basis Sets:   9
 -----------------------
   1 S    7.360000
   2 S    1.720000
   2 S    2.880000
   2 S    7.580000
   2 P    1.120000
   2 P    2.080000
   2 P    4.080000
   3 D    2.000000
   4 F    3.000000

 Frozen Core Shells
 ------------------
    S:  1


 BAS: List of all Elementary Cartesian Basis Functions
 =====================================================

 The numbering in the list below (to the right of the function characteristics) is referred
 to in print-outs of MO eigenvectors and Mulliken populations in the BAS representation
 (as contrasted to the SFO representation).

 Notes:
 1. The functions are characterized by a polynomial prefactor (powers of x,y,z and r) and
    an exponential decay factor alpha.
 2. Since the basis sets are specific for an atom TYPE, the individual functions occur on
    all atoms of that type.
 3. The word 'Core' in the left margin signals that it is a Core Function (CF) : not a
    degree of freedom in the valence set, but only used to ensure orthogonalization of
    the other valence basis functions on the frozen Core Orbitals.


 (power of) X  Y  Z  R     Alpha  on Atom
            ==========     =====     ==========

 O                                    1
                                  ---------------------------------------------------------------------------
    Core    0  0  0  0     7.360      1
            0  0  0  1     1.720      2
            0  0  0  1     2.880      3
            0  0  0  1     7.580      4
            1  0  0  0     1.120      5
            0  1  0  0     1.120      6
            0  0  1  0     1.120      7
            1  0  0  0     2.080      8
            0  1  0  0     2.080      9
            0  0  1  0     2.080     10
            1  0  0  0     4.080     11
            0  1  0  0     4.080     12
            0  0  1  0     4.080     13
            2  0  0  0     2.000     14
            1  1  0  0     2.000     15
            1  0  1  0     2.000     16
            0  2  0  0     2.000     17
            0  1  1  0     2.000     18
            0  0  2  0     2.000     19
            3  0  0  0     3.000     20
            2  1  0  0     3.000     21
            2  0  1  0     3.000     22
            1  2  0  0     3.000     23
            1  1  1  0     3.000     24
            1  0  2  0     3.000     25
            0  3  0  0     3.000     26
            0  2  1  0     3.000     27
            0  1  2  0     3.000     28
            0  0  3  0     3.000     29

 Total number of charge fitting functions (nprimf)        82
 Total number of Cartesian basis functions (naos)         29
 Total number of Cartesian core functions  (ncos)          1


 BAS: List of all Elementary Cartesian Basis Functions
 =====================================================

 The numbering in the list below (to the right of the function characteristics) is referred
 to in print-outs of MO eigenvectors and Mulliken populations in the BAS representation
 (as contrasted to the SFO representation).

 Notes:
 1. The functions are characterized by a polynomial prefactor (powers of x,y,z and r) and
    an exponential decay factor alpha.
 2. Since the basis sets are specific for an atom TYPE, the individual functions occur on
    all atoms of that type.
 3. The word 'Core' in the left margin signals that it is a Core Function (CF) : not a
    degree of freedom in the valence set, but only used to ensure orthogonalization of
    the other valence basis functions on the frozen Core Orbitals.


 (power of) X  Y  Z  R     Alpha  on Atom
            ==========     =====     ==========

 O                                    1
                                  ---------------------------------------------------------------------------
    Core    0  0  0  0     7.360      1
            0  0  0  1     1.720      2
            0  0  0  1     2.880      3
            0  0  0  1     7.580      4
            1  0  0  0     1.120      5
            0  1  0  0     1.120      6
            0  0  1  0     1.120      7
            1  0  0  0     2.080      8
            0  1  0  0     2.080      9
            0  0  1  0     2.080     10
            1  0  0  0     4.080     11
            0  1  0  0     4.080     12
            0  0  1  0     4.080     13
            2  0  0  0     2.000     14
            1  1  0  0     2.000     15
            1  0  1  0     2.000     16
            0  2  0  0     2.000     17
            0  1  1  0     2.000     18
            0  0  2  0     2.000     19
            3  0  0  0     3.000     20
            2  1  0  0     3.000     21
            2  0  1  0     3.000     22
            1  2  0  0     3.000     23
            1  1  1  0     3.000     24
            1  0  2  0     3.000     25
            0  3  0  0     3.000     26
            0  2  1  0     3.000     27
            0  1  2  0     3.000     28
            0  0  3  0     3.000     29
1
 ***************************************************************************************************


                                              ***********************
                                              *  T E C H N I C A L  *
                                              ***********************
  


 =============================================================
 P A R A L L E L I Z A T I O N  and  V E C T O R I Z A T I O N
 =============================================================
  
 Nr of parallel processes:                                1
 Maximum vector length in NumInt loops:                 128

 IO buffersize (Mb):                                     64.000000


 =====================
 S C F   U P D A T E S
 =====================
  
 Max. nr. of cycles:                               300
 Convergence criterion:                              0.0000000100
   secondary criterion:                              0.0000000100

 Mix parameter (when DIIS does not apply):           0.2000000000
 Special mix parameter for the first cycle:          1.0000000000
 Mixed ADIIS+DIIS will be used
    Max number of expansion vectors:                10
    Pure ADIIS when Max([F,P]) is above              0.1000000000
    Pure DIIS when Max([F,P]) is below               0.0010000000
 Automatic ElectronSmearing (in case of problematic SCF convergence) disabled


 =================
 P R E C I S I O N  ***  (General: NumInt, NeglectFunctionTails, ...)  ***
 =================
  

 NumInt:           Target precision:                12.0000000000
 -------           Initial precision:               10.0000000000
                   Min. precision (optimization):   10.0000000000

 Neglect Functions:          Basis functions:        0.1000000000E-13
 ------------------          Fit functions:          0.1000000000E-13


 ===========================
 L I N E A R   S C A L I N G
 ===========================
  

 Cut-off radii density fit:                        0.1000000000E-97
 Overlap cut-off criterion AO matrix elements:     0.1000000000E-97
 Cut-offs for Coulomb potential and fitted density:0.1000000000E-97
 Cut-off criterion for Coulomb multipole terms:    0.1000000000E-97
 Progressive Convergence parameter:                 0.000000000    
1
 ***************************************************************************************************


                                            ***************************
                                            *  C O M P U T A T I O N  *
                                            ***************************
  

 Number of elements of the density matrix on this node (used, total):       435       435


 ===========================================
 Numerical Integration : Fuzzy Cells (Becke)
 ===========================================
  
 Becke grid quality: VERYGOOD       
  
 Lebedev angular grid order:             min:  13 max:  41
 Nr. of radial points:                   min:  68 max:  68

 Total nr. of points:         68
 Nr. of blocks:                1
 Block length:                68
 Nr. of dummy points:          0


 Test of Precision of the Numerical Integration Grid
 ===================================================

 Integral of the Total Core Density:                   1.99999999865610
 Relative Error:                                      -6.720E-10


 ========================
 Density Fitting (zlmFit)
 ========================
  
 ZlmFit Fit Quality: VERYGOOD       
  
 Max L-expansion:                        min:   0 max:   0
 Nr. of radial interpolation points:     min: 160 max: 160


 =====
 S C F  ***  ScaSCF  ***
 =====
  

 CYCLE    1
 SCF Error: norm([F,P])=      0.000000000000, max([F,P])=      0.000000000000
 orbitals (Q,E):
 ---------------
 S :1...3            ( 2.00    -5.3654)  ( 0.00    -2.2073)  ( 0.00    23.6692)
 P :1...3            ( 4.00    -5.0045)  ( 0.00    -2.0150)  ( 0.00    -0.3846)
 D :1...1            ( 0.00    -2.0410)
 F :1...1            ( 0.00    -0.0529)

 CYCLE    2
 SCF Error: norm([F,P])=      4.562808071410, max([F,P])=      2.528883433981
 orbitals (Q,E):
 ---------------
 S :1...2            ( 2.00    -0.1547)  ( 0.00     1.6948)
 P :1...2            ( 4.00     0.1772)  ( 0.00     0.9552)
 D :1...1            ( 0.00     1.4650)
 F :1...1            ( 0.00     3.8403)

 CYCLE    3
  SDIIS (wt  0.000):  0.3378  0.6622
 A-DIIS (wt  1.000):  0.4815  0.5185
  DIIS coefficients:  0.4815  0.5185
 SCF Error: norm([F,P])=      2.723178007181, max([F,P])=      1.798781577477
 orbitals (Q,E):
 ---------------
 S :1...2            ( 2.00    -1.1092)  ( 0.00     0.7550)
 P :1...2            ( 4.00    -0.5517)  ( 0.00     0.2589)
 D :1...1            ( 0.00     0.8910)
 F :1...1            ( 0.00     3.1465)

 CYCLE    4
  SDIIS (wt  0.000):  0.0918  0.9082
 A-DIIS (wt  1.000):  0.0000  1.0000
  DIIS coefficients:  0.0000  1.0000
 SCF Error: norm([F,P])=      0.288798754269, max([F,P])=      0.130531379071
 orbitals (Q,E):
 ---------------
 S :1...2            ( 2.00    -0.7707)  ( 0.00     0.9912)
 P :1...2            ( 4.00    -0.2285)  ( 0.00     0.4047)
 D :1...1            ( 0.00     1.1288)
 F :1...1            ( 0.00     3.4263)

 CYCLE    5
  SDIIS (wt  0.000):  0.0259  0.6739  0.3002
 A-DIIS (wt  1.000):  0.0000  0.5762  0.4238
  DIIS coefficients:  0.0000  0.5762  0.4238
 SCF Error: norm([F,P])=      0.416079409659, max([F,P])=      0.232361399966
 orbitals (Q,E):
 ---------------
 S :1...2            ( 2.00    -0.8764)  ( 0.00     0.9107)
 P :1...2            ( 4.00    -0.3279)  ( 0.00     0.3558)
 D :1...1            ( 0.00     1.0703)
 F :1...1            ( 0.00     3.3558)

 CYCLE    6
  SDIIS (wt  0.943):  0.0005  0.0237 -0.0200  0.9958
 A-DIIS (wt  0.057):  0.0000  0.0000  0.0000  1.0000
  DIIS coefficients:  0.0005  0.0224 -0.0189  0.9960
 SCF Error: norm([F,P])=      0.013627981721, max([F,P])=      0.006665205403
 orbitals (Q,E):
 ---------------
 S :1...2            ( 2.00    -0.8830)  ( 0.00     0.9059)
 P :1...2            ( 4.00    -0.3343)  ( 0.00     0.3522)
 D :1...1            ( 0.00     1.0658)
 F :1...1            ( 0.00     3.3506)

 CYCLE    7
  SDIIS (wt  1.000): -0.0000  0.0016  0.0022  0.0423  0.9538
  DIIS coefficients: -0.0000  0.0016  0.0022  0.0423  0.9538
 SCF Error: norm([F,P])=      0.001087898542, max([F,P])=      0.000624942777
 orbitals (Q,E):
 ---------------
 S :1...2            ( 2.00    -0.8827)  ( 0.00     0.9061)
 P :1...2            ( 4.00    -0.3340)  ( 0.00     0.3524)
 D :1...1            ( 0.00     1.0659)
 F :1...1            ( 0.00     3.3508)

 CYCLE    8
  SDIIS (wt  1.000): -0.0000 -0.0001  0.0000 -0.0032  0.0268  0.9764
  DIIS coefficients: -0.0000 -0.0001  0.0000 -0.0032  0.0268  0.9764
 SCF Error: norm([F,P])=      0.000035165957, max([F,P])=      0.000019840684
 orbitals (Q,E):
 ---------------
 S :1...2            ( 2.00    -0.8827)  ( 0.00     0.9061)
 P :1...2            ( 4.00    -0.3340)  ( 0.00     0.3524)
 D :1...1            ( 0.00     1.0659)
 F :1...1            ( 0.00     3.3508)

 CYCLE    9
  SDIIS (wt  1.000): -0.0000  0.0008  0.0189  0.9803
  DIIS coefficients: -0.0000  0.0008  0.0189  0.9803
 SCF Error: norm([F,P])=      0.000000326442, max([F,P])=      0.000000184027
 orbitals (Q,E):
 ---------------
 S :1...2            ( 2.00    -0.8827)  ( 0.00     0.9061)
 P :1...2            ( 4.00    -0.3340)  ( 0.00     0.3524)
 D :1...1            ( 0.00     1.0659)
 F :1...1            ( 0.00     3.3508)

 CYCLE   10
  SDIIS (wt  1.000):  0.0000  0.0004  0.9996
  DIIS coefficients:  0.0000  0.0004  0.9996
 SCF Error: norm([F,P])=      0.000000000571, max([F,P])=      0.000000000313
 orbitals (Q,E):
 ---------------
 S :1...2            ( 2.00    -0.8827)  ( 0.00     0.9061)
 P :1...2            ( 4.00    -0.3340)  ( 0.00     0.3524)
 D :1...1            ( 0.00     1.0659)
 F :1...1            ( 0.00     3.3508)

 SCF CONVERGED

 CYCLE   11
1
 ***************************************************************************************************


                                                *******************
                                                *  R E S U L T S  *
                                                *******************
  
  
 Hartree-Fock exchange energy:   -2.57561980706707     
 *** Setting up for NEW gradients in Focky
 *** Using FIT density in Focky

 Scaled ZORA Orbital Energies, per Irrep and Spin:
 =================================================
                        Occup              E (au)              E (eV)       Diff (eV) with prev. cycle
                        -----      --------------------        ------       --------------------------
 S
               1        2.000     -0.88268550294761E+00       -24.019              -9.50E-11
               2        0.000      0.90607230378392E+00        24.655
               3        0.000      0.29578809504483E+02       804.880
 P
               1        4.000     -0.33397083422303E+00        -9.088              -9.15E-11
               2        0.000      0.35235595488271E+00         9.588
               3        0.000      0.38342840546130E+01       104.336
 D
               1        0.000      0.10659203266423E+01        29.005
 F
               1        0.000      0.33507642281247E+01        91.179


 Partially Occupied:
               1 P                -0.33397083422303E+00
  
 HOMO :        1 S                -0.88268550294761E+00
 LUMO :        2 P                 0.35235595488271E+00
  


 Orbital Energies, all Irreps
 ========================================

 Irrep        no.  (spin)   Occup              E (au)                E (eV)
 ---------------------------------------------------------------------------
 S             1             2.00       -0.88268550294761E+00       -24.0191
 P             1             4.00       -0.33397083422303E+00        -9.0878
 P             2             0.00        0.35235595488271E+00         9.5881
 S             2             0.00        0.90607230378392E+00        24.6555
 D             1             0.00        0.10659203266423E+01        29.0052
 F             1             0.00        0.33507642281247E+01        91.1789
 P             3             0.00        0.38342840546130E+01       104.3362
 S             3             0.00        0.29578809504483E+02       804.8804


 Scaled ZORA Orbital Energies of the Core Orbitals:
 ==================================================

 (Note that the atoms are grouped by atomtype, see the labels, and may hence NOT be in input order)

 AtomType  Orbital  Atom                   E (au)                        E (eV)
 --------  -------  ----           --------------------        ----------------
 O           1S        1          -0.18925931516241E+02                -515.001


 =======================================
 M U L L I K E N   P O P U L A T I O N S
 =======================================
  
 The survey below gives for each atom:
 a) the total charge (Z minus electrons)
 b) the net spin polarization (nr of electrons spin-A minus spin-B)
 c) for each spin the atomic electron valence density (integrated) per L-value.

 Atom              Charge    Spin density          S         P         D         F
 ----              ------    ------------       ------    ------    ------    ------
 1 O               0.0000                       2.0000    4.0000    0.0000    0.0000

 Populations of individual BAS functions
 ----------------------------------------
 1 O            0.0005  0.9226  1.0965 -0.0196  0.3345  0.3345  0.3345  0.7512  0.7512  0.7512
                0.2476  0.2476  0.2476  0.0000  0.0000  0.0000  0.0000  0.0000  0.0000  0.0000
                0.0000  0.0000  0.0000  0.0000  0.0000  0.0000  0.0000  0.0000  0.0000

 Gross Charges per Atom (Z minus electrons)
 ==========================================
             0.0000
 Net Total:  0.00000000


 =======================================================================
 Electrostatic potential at the Nuclei due to electrons and other nuclei
 =======================================================================
  
         Atom                  Potential
         ----                  ---------
     1)   O                  22.20265734
 
 
 ========================
 No memory problems found
 ========================
 
 Maximum number of active allocate calls:         493
 
 *******************************************************************************

                             A D F   E X I T
 NORMAL TERMINATION


 =================
 Timing Statistics
 =================
  
 Total Used :                     CPU=        0.29      System=        0.02     Elapsed=        0.36

 Calls  Section                     ( Mean, Percentage )
 ---------------------------------------------------------------------------------------------------
     3  ><      ................      0.00    0.16             0.00    1.42             0.00    0.73
     1  INIT    ................      0.01    2.42             0.01   43.05             0.03    6.94
     1  GEOMET  ................      0.01    2.15             0.00    0.00             0.01    3.34
     1  INPUTA  ................      0.00    0.32             0.00    2.97             0.00    0.57
     1  MAINSY  ................      0.01    2.29             0.00    2.18             0.01    3.46
     1  SYMFIT  ................      0.00    0.29             0.00    0.00             0.00    0.23
     1  CORORT  ................      0.00    0.30             0.00    0.00             0.00    0.61
     1  SYMORB  ................      0.00    0.29             0.00    0.00             0.00    0.23
     1  FITINT  ................      0.01    3.09             0.00    0.00             0.01    2.83
     1  CLSMAT  ................      0.00    0.10             0.00    0.00             0.00    0.46
     1  ORTHON  ................      0.00    0.44             0.00    0.00             0.00    0.63
     1  GENPT   ................      0.01    3.03             0.00    0.00             0.01    3.06
     1  PTBAS   ................      0.00    1.18             0.00    0.00             0.00    1.30
    11  FOCKY   ................      0.02   69.82             0.00    5.17             0.02   56.16
    11  FOCKTR  ................      0.00    2.23             0.00    0.34             0.00    1.78
    11  SDIIS   ................      0.00    4.01             0.00    5.48             0.00    7.99
     1  COREPS  ................      0.01    3.90             0.00   10.85             0.01    3.68
     1  POPAN   ................      0.00    0.72             0.00    8.16             0.01    1.42
     1  DEBYE   ................      0.00    0.15             0.00    0.17             0.00    0.42
     1  EXIT PROCEDURE .........      0.01    3.10             0.00   20.20             0.02    4.18


 Currently Open Files (EXIT00)
 ====================

 Unit    Access Format  Status   Type       Ident (file)
 -------------------------------------------------------
   3      SEQ    FORM   TRANSP  NORMAL      LOGFILE
                                          ( logfile )


 Buffered I/O statistics
 =======================
 Memory available:                     67108864
 Number of records fitting in memory:     16131
 Input :   0.1% of                        30344  *4k bytes
 Output:  15.8% of                         1477  *4k bytes
 Records from serial files evicted:           0
                    others evicted:           0
 Hash table lookups:      78539 with          0 conflicts (  0.00%)

 ***************************************************************************************************
 (LOGFILE)
 <Dec08-2020> <02:12:43>  DIRAC 2017  RunTime: Dec08-2020 02:12:43  Nodes: 1  Procs: 1
 <Dec08-2020> <02:12:43>  NORMAL TERMINATION
 <Dec08-2020> <02:12:43>  END
 <Dec08-2020> <02:12:44>  ADF 2017  RunTime: Dec08-2020 02:12:44  Nodes: 1  Procs: 1
 <Dec08-2020> <02:12:44>  Hydrogen (TZ2P)
 <Dec08-2020> <02:12:44>  RunType   : CREATE
 <Dec08-2020> <02:12:44>  Net Charge: 0 (Nuclei minus Electrons)
 <Dec08-2020> <02:12:44>  Symmetry  : ATOM
  Coordinates
    Atom         X           Y           Z   (Angstrom)
    1.H         0.000000    0.000000    0.000000
 <Dec08-2020> <02:12:44>  >>>> CORORT
 <Dec08-2020> <02:12:44>  >>>> FITINT
 <Dec08-2020> <02:12:44>  >>>> CLSMAT
 <Dec08-2020> <02:12:44>  >>>> ORTHON
 <Dec08-2020> <02:12:44>  >>>> GENPT
 <Dec08-2020> <02:12:44>  Block Length=  64
 <Dec08-2020> <02:12:44>  >>>> PTBAS
 <Dec08-2020> <02:12:44>  >>>> CYCLE
 <Dec08-2020> <02:12:44>              |Error|         MaxErr       Wt(A-DIIS)
 <Dec08-2020> <02:12:44>      1      0.00000000      0.00000000
 <Dec08-2020> <02:12:44>      2      0.03155047      0.03012130
 <Dec08-2020> <02:12:44>      3      0.00862036      0.00834572    100.0
 <Dec08-2020> <02:12:44>      4      0.00173320      0.00171953      0.7
 <Dec08-2020> <02:12:44>      5      0.00004372      0.00003982      0.0
 <Dec08-2020> <02:12:44>      6      0.00000239      0.00000216      0.0
 <Dec08-2020> <02:12:44>      7      0.00000001      0.00000001      0.0
 <Dec08-2020> <02:12:44>  SCF converged
 <Dec08-2020> <02:12:44>      8      0.00000000      0.00000000      0.0
 <Dec08-2020> <02:12:44>  >>>> POPAN
 <Dec08-2020> <02:12:44>  >>>> DEBYE
 <Dec08-2020> <02:12:44>  NORMAL TERMINATION
 <Dec08-2020> <02:12:44>  END
 <Dec08-2020> <02:12:45>  DIRAC 2017  RunTime: Dec08-2020 02:12:45  Nodes: 1  Procs: 1
 <Dec08-2020> <02:12:45>  NORMAL TERMINATION
 <Dec08-2020> <02:12:45>  END
 <Dec08-2020> <02:12:45>  ADF 2017  RunTime: Dec08-2020 02:12:45  Nodes: 1  Procs: 1
 <Dec08-2020> <02:12:45>  Oxygen (TZ2P, 1s frozen)
 <Dec08-2020> <02:12:45>  RunType   : CREATE
 <Dec08-2020> <02:12:45>  Net Charge: 0 (Nuclei minus Electrons)
 <Dec08-2020> <02:12:45>  Symmetry  : ATOM
  Coordinates
    Atom         X           Y           Z   (Angstrom)
    1.O         0.000000    0.000000    0.000000
 <Dec08-2020> <02:12:45>  >>>> CORORT
 <Dec08-2020> <02:12:45>  >>>> FITINT
 <Dec08-2020> <02:12:45>  >>>> CLSMAT
 <Dec08-2020> <02:12:45>  >>>> ORTHON
 <Dec08-2020> <02:12:45>  >>>> GENPT
 <Dec08-2020> <02:12:45>  Block Length=  68
 <Dec08-2020> <02:12:45>  >>>> PTBAS
 <Dec08-2020> <02:12:45>  >>>> CYCLE
 <Dec08-2020> <02:12:45>              |Error|         MaxErr       Wt(A-DIIS)
 <Dec08-2020> <02:12:45>      1      0.00000000      0.00000000
 <Dec08-2020> <02:12:45>      2      4.56280807      2.52888343
 <Dec08-2020> <02:12:45>      3      2.72317801      1.79878158    100.0
 <Dec08-2020> <02:12:45>      4      0.28879875      0.13053138    100.0
 <Dec08-2020> <02:12:45>      5      0.41607941      0.23236140    100.0
 <Dec08-2020> <02:12:45>      6      0.01362798      0.00666521      5.7
 <Dec08-2020> <02:12:45>      7      0.00108790      0.00062494      0.0
 <Dec08-2020> <02:12:45>      8      0.00003517      0.00001984      0.0
 <Dec08-2020> <02:12:45>      9      0.00000033      0.00000018      0.0
 <Dec08-2020> <02:12:45>     10      0.00000000      0.00000000      0.0
 <Dec08-2020> <02:12:45>  SCF converged
 <Dec08-2020> <02:12:45>     11      0.00000000      0.00000000      0.0
 <Dec08-2020> <02:12:45>  >>>> POPAN
 <Dec08-2020> <02:12:45>  >>>> DEBYE
 <Dec08-2020> <02:12:45>  NORMAL TERMINATION
 <Dec08-2020> <02:12:45>  END
NORMAL TERMINATION

 *******************************************************************************
 *                                                                             *
 *  -------------------------------------                                      *
 *   Amsterdam Density Functional  (ADF)         2017                          *
 *  -------------------------------------                                      *
 *                                               r58813 2017-04-12             *
 *                                                                             *
 *                                                                             *
 *                            =====================                            *
 *                            |                   |                            *
 *                            |     D I R A C     |                            *
 *                            |                   |                            *
 *                            =====================                            *
 *                                                                             *
 *                                                                             *
 *   Online information and documentation:  https://www.scm.com/support/       *
 *   E-mail:  support@scm.com   info@scm.com                                   *
 *                                                                             *
 *   Scientific publications using ADF results must be properly referenced     *
 *   See the User Manuals (or the web site) for recommended citations          *
 *   The terms and conditions of the End User License Agreement apply to       *
 *   the use of ADF, https://www.scm.com/license-terms/                        *
 *                                                                             *
 **********************  x86_64_linux_intel / intelmpi  ************************
 
 Licensed to: SURF-SARA, Comp. & Networking Services / Amsterdam / NL
 SCM User ID: u7409
  
 DIRAC 2017  RunTime: Dec08-2020 02:12:45  Nodes: 1  Procs: 1

 Temporary files are created in /scratch/kid_0.7f18P6

1
 CARBON ATOM 1s CORE RELATIVISTIC, Point Nuc, A and c from li
 N J RN H ZN XION ANUC CLIGHT
 5000    4100.00000000197.36710137  6.00000000  0.00000000   12.000000  0.1370360E+03
  PH   PHI     EPS        DEL        DELRVR
  0.30  0.30     2500.00  0.00001000  0.00001000
 IDIRC  NC1  NDEBU NPRIN  IPUN IRCOR IWCOR
   1   300     0     0     0     0     1
   XALPHA      XLATTER      RNUC
  0.70000000  0.00000000  0.00000000 Point Charge
   XN   XL   XJ      XE          XZ      XDELL
  1.0  0.0  0.5      -5.000       2.000     0.00000
  2.0  0.0  0.5      -1.000       2.000     0.00000
  2.0  1.0  0.5      -1.000       2.000     0.00000
  2.0  1.0  1.5      -1.000       0.000     0.00000
 ICORP=  0  NPCL=  0  DEMP=0.00  PEPS=0.000000
 R(1)=  0.1000000E-08 D=  0.1005080E+01 RNUC=  0.0000000E+00
 converged at cycle   26  DENSITY AVERAGING    0.3000
  MAXIMUM ERROR IN R.V(R) IS   0.55010513E-05
 Q,EY,EV,EZ,ESUM,ETOT,RHO  0.600000E+01 -0.610129E+01 -0.585189E+02 -0.876464E+02 -0.211985E+02 -0.372876E+02  0.164808E-14


 DIRAC CALCULATION
1                    CARBON ATOM 1s CORE RELATIVISTIC, Point Nuc, A and c from libtc


 EXCHANGE COEFFICIENT=  0.7000000           TAIL CORRECTION=  0.           NUCLEAR RADIUS=  0.000E+00
0                       ORBITAL    N    L    J     ELECTRONS     EIGENVALUE                DELTA OF EIGENV.

                          1S1/2  1.0  0.0  0.5     2.000       -0.9959611E+01                 0.1355092E-04
                          2S1/2  2.0  0.0  0.5     2.000       -0.4708542E+00                 0.1106918E-05
                          2P1/2  2.0  1.0  0.5     2.000       -0.1687896E+00                 0.8770186E-06
                          2P3/2  2.0  1.0  1.5     0.000       -0.1684646E+00                 0.8770830E-06


                                        NUCLEAR CHARGE=    6.000000
                            INTEGRAL OF CHARGE DENSITY=    6.000000
                           SUM OF THE ORBITAL ENERGIES=    -21.1985
                                          TOTAL ENERGY=    -37.2876
                                        KINETIC ENERGY=     37.3204
                             NUCLEAR ATTRACTION ENERGY=    -87.6464
                             ELECTRON REPULSION ENERGY=     17.6144
                                       EXCHANGE ENERGY=     -4.5760

 *******************************************************************************

                             D I R A C   E X I T
 NORMAL TERMINATION


 =================
 Timing Statistics
 =================
  
 Total Used :                     CPU=        0.07      System=        0.01     Elapsed=        0.09

 Calls  Section                     ( Mean, Percentage )
 ---------------------------------------------------------------------------------------------------
     2  ><      ................      0.00    0.01             0.00    0.03             0.00    0.01
     1  EXIT PROCEDURE .........      0.07   99.99             0.01   99.97             0.09   99.99


 Currently Open Files (EXIT00)
 ====================

 Unit    Access Format  Status   Type       Ident (file)
 -------------------------------------------------------
   3      SEQ    FORM   TRANSP  NORMAL      LOGFILE
                                          ( logfile )


 Buffered I/O statistics
 =======================
 Memory available:                     67108864
 Number of records fitting in memory:     16131
 Input : 100.0% of                            0  *4k bytes
 Output: 100.0% of                            0  *4k bytes
 Records from serial files evicted:           0
                    others evicted:           0
 Hash table lookups:          0 with          0 conflicts (100.00%)
NORMAL TERMINATION

Create C   file=TZ2P-C.1s
XC
  GGA PBE
End
relativistic ZORA
HartreeFock
Corepotentials t12.rel
End Input

 *******************************************************************************
 *                                                                             *
 *  -------------------------------------                                      *
 *   Amsterdam Density Functional  (ADF)         2017                          *
 *  -------------------------------------                                      *
 *                                               r58813 2017-04-12             *
 *                                                                             *
 *                                                                             *
 *                              =================                              *
 *                              |               |                              *
 *                              |     A D F     |                              *
 *                              |               |                              *
 *                              =================                              *
 *                                                                             *
 *                                                                             *
 *   Online information and documentation:  https://www.scm.com/support/       *
 *   E-mail:  support@scm.com   info@scm.com                                   *
 *                                                                             *
 *   Scientific publications using ADF results must be properly referenced     *
 *   See the User Manuals (or the web site) for recommended citations          *
 *   The terms and conditions of the End User License Agreement apply to       *
 *   the use of ADF, https://www.scm.com/license-terms/                        *
 *                                                                             *
 **********************  x86_64_linux_intel / intelmpi  ************************
 
 Licensed to: SURF-SARA, Comp. & Networking Services / Amsterdam / NL
 SCM User ID: u7409
  
 ADF 2017  RunTime: Dec08-2020 02:12:45  Nodes: 1  Procs: 1

 Temporary files are created in /scratch/kid_0.gTJyQi

 Carbon (TZ2P, 1s frozen)


 ===========================
 A T T A C H E D   F I L E S
 ===========================
  
 CREATE - Data File:    TZ2P-C.1s
                        Carbon (TZ2P, 1s frozen)
 Core Potentials:
         file : t12.rel


 ===============================
 M O D E L   P A R A M E T E R S
 ===============================
  
 DENSITY FUNCTIONAL POTENTIAL (scf)
    LDA:                               PW92                                    == Not Default ==
    Gradient Corrections:              PBEc PBEx                               == Not Default ==

 SPIN  (restricted / unrestr.)
    Molecule:                          Restricted                               

 OTHER ASPECTS
    Relativistic Corrections:          scalar (ZORA,MAPA)                      == Not Default ==

    Nuclear Charge Density Model:      Point Charge Nuclei                      
    Core Treatment:                    Frozen Orbital(s)                        

    Hyperfine or Zeeman Interaction:   ---                                      


 =====================================
 S Y M M E T R Y ,   E L E C T R O N S
 =====================================
  
 Symmetry: ATOM

 Irreducible Representations, including subspecies
 -------------------------------------------------
 S
 P:x  P:y  P:z
 D:z2  D:x2-y2  D:xy  D:xz  D:yz
 F:z3  F:z  F:xyz  F:z2x  F:z2y  F:x  F:y


 Configuration of Valence Electrons
 ==================================

          Occupation Numbers
          -------------------------------------------------
 S        2
 P        2
 D        0
 F        0
          -------------------------------------------------

 Total:   4

 Net Charge: 0 (Nuclei minus Electrons)

 Preset values for MO occupations will be applied through SCF cycle no. 1000000
 Thereafter, the program will assign electrons to MOs that are spatially
 similar to the occupied MOs in a "reference" cycle ("KeepOrbitals").
 The reference cycle is always the PREVIOUS cycle: it will evolve with
 the SCF procedure.


 ================================
 (Slater-type)  F U N C T I O N S  ***  (Basis and Fit)  ***
 ================================
  

 Atom Type    1  (C)
 ==============

 Valence Basis Sets:   9
 -----------------------
   1 S    5.400000
   2 S    1.280000
   2 S    2.100000
   2 S    4.600000
   2 P    0.820000
   2 P    1.480000
   2 P    2.940000
   3 D    2.200000
   4 F    3.300000

 Frozen Core Shells
 ------------------
    S:  1


 BAS: List of all Elementary Cartesian Basis Functions
 =====================================================

 The numbering in the list below (to the right of the function characteristics) is referred
 to in print-outs of MO eigenvectors and Mulliken populations in the BAS representation
 (as contrasted to the SFO representation).

 Notes:
 1. The functions are characterized by a polynomial prefactor (powers of x,y,z and r) and
    an exponential decay factor alpha.
 2. Since the basis sets are specific for an atom TYPE, the individual functions occur on
    all atoms of that type.
 3. The word 'Core' in the left margin signals that it is a Core Function (CF) : not a
    degree of freedom in the valence set, but only used to ensure orthogonalization of
    the other valence basis functions on the frozen Core Orbitals.


 (power of) X  Y  Z  R     Alpha  on Atom
            ==========     =====     ==========

 C                                    1
                                  ---------------------------------------------------------------------------
    Core    0  0  0  0     5.400      1
            0  0  0  1     1.280      2
            0  0  0  1     2.100      3
            0  0  0  1     4.600      4
            1  0  0  0     0.820      5
            0  1  0  0     0.820      6
            0  0  1  0     0.820      7
            1  0  0  0     1.480      8
            0  1  0  0     1.480      9
            0  0  1  0     1.480     10
            1  0  0  0     2.940     11
            0  1  0  0     2.940     12
            0  0  1  0     2.940     13
            2  0  0  0     2.200     14
            1  1  0  0     2.200     15
            1  0  1  0     2.200     16
            0  2  0  0     2.200     17
            0  1  1  0     2.200     18
            0  0  2  0     2.200     19
            3  0  0  0     3.300     20
            2  1  0  0     3.300     21
            2  0  1  0     3.300     22
            1  2  0  0     3.300     23
            1  1  1  0     3.300     24
            1  0  2  0     3.300     25
            0  3  0  0     3.300     26
            0  2  1  0     3.300     27
            0  1  2  0     3.300     28
            0  0  3  0     3.300     29

 Total number of charge fitting functions (nprimf)        82
 Total number of Cartesian basis functions (naos)         29
 Total number of Cartesian core functions  (ncos)          1


 BAS: List of all Elementary Cartesian Basis Functions
 =====================================================

 The numbering in the list below (to the right of the function characteristics) is referred
 to in print-outs of MO eigenvectors and Mulliken populations in the BAS representation
 (as contrasted to the SFO representation).

 Notes:
 1. The functions are characterized by a polynomial prefactor (powers of x,y,z and r) and
    an exponential decay factor alpha.
 2. Since the basis sets are specific for an atom TYPE, the individual functions occur on
    all atoms of that type.
 3. The word 'Core' in the left margin signals that it is a Core Function (CF) : not a
    degree of freedom in the valence set, but only used to ensure orthogonalization of
    the other valence basis functions on the frozen Core Orbitals.


 (power of) X  Y  Z  R     Alpha  on Atom
            ==========     =====     ==========

 C                                    1
                                  ---------------------------------------------------------------------------
    Core    0  0  0  0     5.400      1
            0  0  0  1     1.280      2
            0  0  0  1     2.100      3
            0  0  0  1     4.600      4
            1  0  0  0     0.820      5
            0  1  0  0     0.820      6
            0  0  1  0     0.820      7
            1  0  0  0     1.480      8
            0  1  0  0     1.480      9
            0  0  1  0     1.480     10
            1  0  0  0     2.940     11
            0  1  0  0     2.940     12
            0  0  1  0     2.940     13
            2  0  0  0     2.200     14
            1  1  0  0     2.200     15
            1  0  1  0     2.200     16
            0  2  0  0     2.200     17
            0  1  1  0     2.200     18
            0  0  2  0     2.200     19
            3  0  0  0     3.300     20
            2  1  0  0     3.300     21
            2  0  1  0     3.300     22
            1  2  0  0     3.300     23
            1  1  1  0     3.300     24
            1  0  2  0     3.300     25
            0  3  0  0     3.300     26
            0  2  1  0     3.300     27
            0  1  2  0     3.300     28
            0  0  3  0     3.300     29
1
 ***************************************************************************************************


                                              ***********************
                                              *  T E C H N I C A L  *
                                              ***********************
  


 =============================================================
 P A R A L L E L I Z A T I O N  and  V E C T O R I Z A T I O N
 =============================================================
  
 Nr of parallel processes:                                1
 Maximum vector length in NumInt loops:                 128

 IO buffersize (Mb):                                     64.000000


 =====================
 S C F   U P D A T E S
 =====================
  
 Max. nr. of cycles:                               300
 Convergence criterion:                              0.0000000100
   secondary criterion:                              0.0000000100

 Mix parameter (when DIIS does not apply):           0.2000000000
 Special mix parameter for the first cycle:          1.0000000000
 Mixed ADIIS+DIIS will be used
    Max number of expansion vectors:                10
    Pure ADIIS when Max([F,P]) is above              0.1000000000
    Pure DIIS when Max([F,P]) is below               0.0010000000
 Automatic ElectronSmearing (in case of problematic SCF convergence) disabled


 =================
 P R E C I S I O N  ***  (General: NumInt, NeglectFunctionTails, ...)  ***
 =================
  

 NumInt:           Target precision:                12.0000000000
 -------           Initial precision:               10.0000000000
                   Min. precision (optimization):   10.0000000000

 Neglect Functions:          Basis functions:        0.1000000000E-13
 ------------------          Fit functions:          0.1000000000E-13


 ===========================
 L I N E A R   S C A L I N G
 ===========================
  

 Cut-off radii density fit:                        0.1000000000E-97
 Overlap cut-off criterion AO matrix elements:     0.1000000000E-97
 Cut-offs for Coulomb potential and fitted density:0.1000000000E-97
 Cut-off criterion for Coulomb multipole terms:    0.1000000000E-97
 Progressive Convergence parameter:                 0.000000000    
1
 ***************************************************************************************************


                                            ***************************
                                            *  C O M P U T A T I O N  *
                                            ***************************
  

 Number of elements of the density matrix on this node (used, total):       435       435


 ===========================================
 Numerical Integration : Fuzzy Cells (Becke)
 ===========================================
  
 Becke grid quality: VERYGOOD       
  
 Lebedev angular grid order:             min:  13 max:  41
 Nr. of radial points:                   min:  72 max:  72

 Total nr. of points:         72
 Nr. of blocks:                1
 Block length:                72
 Nr. of dummy points:          0


 Test of Precision of the Numerical Integration Grid
 ===================================================

 Integral of the Total Core Density:                   1.99999999338073
 Relative Error:                                      -3.310E-09


 ========================
 Density Fitting (zlmFit)
 ========================
  
 ZlmFit Fit Quality: VERYGOOD       
  
 Max L-expansion:                        min:   0 max:   0
 Nr. of radial interpolation points:     min: 160 max: 160


 =====
 S C F  ***  ScaSCF  ***
 =====
  

 CYCLE    1
 SCF Error: norm([F,P])=      0.000000000000, max([F,P])=      0.000000000000
 orbitals (Q,E):
 ---------------
 S :1...3            ( 2.00    -2.5692)  ( 0.00    -1.0174)  ( 0.00     7.2796)
 P :1...3            ( 2.00    -2.3217)  ( 0.00    -0.9251)  ( 0.00    -0.0030)
 D :1...1            ( 0.00    -0.6267)
 F :1...1            ( 0.00     1.9961)

 CYCLE    2
 SCF Error: norm([F,P])=      1.588399888967, max([F,P])=      1.243959351543
 orbitals (Q,E):
 ---------------
 S :1...2            ( 2.00    -0.1717)  ( 0.00     0.7478)
 P :1...2            ( 2.00     0.0573)  ( 0.00     0.4149)
 D :1...1            ( 0.00     1.5814)
 F :1...1            ( 0.00     4.4142)

 CYCLE    3
  SDIIS (wt  0.000):  0.3215  0.6785
 A-DIIS (wt  1.000):  0.3217  0.6783
  DIIS coefficients:  0.3217  0.6783
 SCF Error: norm([F,P])=      0.835164933187, max([F,P])=      0.696959722204
 orbitals (Q,E):
 ---------------
 S :1...2            ( 2.00    -0.6548)  ( 0.00     0.3319)
 P :1...2            ( 2.00    -0.3390)  ( 0.00     0.1125)
 D :1...1            ( 0.00     1.0911)
 F :1...1            ( 0.00     3.8482)

 CYCLE    4
  SDIIS (wt  0.000):  0.1974  0.8026
 A-DIIS (wt  1.000):  0.0000  1.0000
  DIIS coefficients:  0.0000  1.0000
 SCF Error: norm([F,P])=      0.211930829960, max([F,P])=      0.169888557560
 orbitals (Q,E):
 ---------------
 S :1...2            ( 2.00    -0.4260)  ( 0.00     0.4963)
 P :1...2            ( 2.00    -0.1224)  ( 0.00     0.2118)
 D :1...1            ( 0.00     1.3128)
 F :1...1            ( 0.00     4.0971)

 CYCLE    5
  SDIIS (wt  0.000): -0.0390  0.4047  0.6343
 A-DIIS (wt  1.000):  0.0000  0.4243  0.5757
  DIIS coefficients:  0.0000  0.4243  0.5757
 SCF Error: norm([F,P])=      0.184808617934, max([F,P])=      0.149673115184
 orbitals (Q,E):
 ---------------
 S :1...2            ( 2.00    -0.5162)  ( 0.00     0.4284)
 P :1...2            ( 2.00    -0.2041)  ( 0.00     0.1676)
 D :1...1            ( 0.00     1.2258)
 F :1...1            ( 0.00     3.9972)

 CYCLE    6
  SDIIS (wt  0.876): -0.0007 -0.0265  0.0592  0.9681
 A-DIIS (wt  0.124):  0.0000  0.0000  0.0000  1.0000
  DIIS coefficients: -0.0006 -0.0233  0.0519  0.9720
 SCF Error: norm([F,P])=      0.016472831098, max([F,P])=      0.013230609839
 orbitals (Q,E):
 ---------------
 S :1...2            ( 2.00    -0.5063)  ( 0.00     0.4356)
 P :1...2            ( 2.00    -0.1948)  ( 0.00     0.1715)
 D :1...1            ( 0.00     1.2353)
 F :1...1            ( 0.00     4.0080)

 CYCLE    7
  SDIIS (wt  0.994):  0.0004  0.0080 -0.0178 -0.1481  1.1574
 A-DIIS (wt  0.006):  0.0000  0.0000  0.0000  0.0000  1.0000
  DIIS coefficients:  0.0004  0.0080 -0.0177 -0.1472  1.1565
 SCF Error: norm([F,P])=      0.001905320648, max([F,P])=      0.001549492888
 orbitals (Q,E):
 ---------------
 S :1...2            ( 2.00    -0.5072)  ( 0.00     0.4350)
 P :1...2            ( 2.00    -0.1957)  ( 0.00     0.1711)
 D :1...1            ( 0.00     1.2345)
 F :1...1            ( 0.00     4.0070)

 CYCLE    8
  SDIIS (wt  1.000):  0.0002 -0.0002 -0.0044  0.0092  0.9952
  DIIS coefficients:  0.0002 -0.0002 -0.0044  0.0092  0.9952
 SCF Error: norm([F,P])=      0.000014101331, max([F,P])=      0.000011368016
 orbitals (Q,E):
 ---------------
 S :1...2            ( 2.00    -0.5072)  ( 0.00     0.4350)
 P :1...2            ( 2.00    -0.1957)  ( 0.00     0.1711)
 D :1...1            ( 0.00     1.2345)
 F :1...1            ( 0.00     4.0070)

 CYCLE    9
  SDIIS (wt  1.000): -0.0000 -0.0006 -0.0188  1.0194
  DIIS coefficients: -0.0000 -0.0006 -0.0188  1.0194
 SCF Error: norm([F,P])=      0.000000372617, max([F,P])=      0.000000306168
 orbitals (Q,E):
 ---------------
 S :1...2            ( 2.00    -0.5072)  ( 0.00     0.4350)
 P :1...2            ( 2.00    -0.1957)  ( 0.00     0.1711)
 D :1...1            ( 0.00     1.2345)
 F :1...1            ( 0.00     4.0070)

 CYCLE   10
  SDIIS (wt  1.000): -0.0000  0.0034  0.9966
  DIIS coefficients: -0.0000  0.0034  0.9966
 SCF Error: norm([F,P])=      0.000000001551, max([F,P])=      0.000000001265
 orbitals (Q,E):
 ---------------
 S :1...2            ( 2.00    -0.5072)  ( 0.00     0.4350)
 P :1...2            ( 2.00    -0.1957)  ( 0.00     0.1711)
 D :1...1            ( 0.00     1.2345)
 F :1...1            ( 0.00     4.0070)

 SCF CONVERGED

 CYCLE   11
1
 ***************************************************************************************************


                                                *******************
                                                *  R E S U L T S  *
                                                *******************
  
  
 Hartree-Fock exchange energy:   -1.00241546229594     
 *** Setting up for NEW gradients in Focky
 *** Using FIT density in Focky

 Scaled ZORA Orbital Energies, per Irrep and Spin:
 =================================================
                        Occup              E (au)              E (eV)       Diff (eV) with prev. cycle
                        -----      --------------------        ------       --------------------------
 S
               1        2.000     -0.50715776408090E+00       -13.800              -1.49E-10
               2        0.000      0.43497730907763E+00        11.836
               3        0.000      0.99350900408098E+01       270.348
 P
               1        2.000     -0.19567480274567E+00        -5.325              -1.41E-10
               2        0.000      0.17109489205978E+00         4.656
               3        0.000      0.20249908577505E+01        55.103
 D
               1        0.000      0.12344587287095E+01        33.591
 F
               1        0.000      0.40069776225730E+01       109.035


 Partially Occupied:
               1 P                -0.19567480274567E+00
  
 HOMO :        1 S                -0.50715776408090E+00
 LUMO :        2 P                 0.17109489205978E+00
  


 Orbital Energies, all Irreps
 ========================================

 Irrep        no.  (spin)   Occup              E (au)                E (eV)
 ---------------------------------------------------------------------------
 S             1             2.00       -0.50715776408090E+00       -13.8005
 P             1             2.00       -0.19567480274567E+00        -5.3246
 P             2             0.00        0.17109489205978E+00         4.6557
 S             2             0.00        0.43497730907763E+00        11.8363
 D             1             0.00        0.12344587287095E+01        33.5913
 P             3             0.00        0.20249908577505E+01        55.1028
 F             1             0.00        0.40069776225730E+01       109.0354
 S             3             0.00        0.99350900408098E+01       270.3476


 Scaled ZORA Orbital Energies of the Core Orbitals:
 ==================================================

 (Note that the atoms are grouped by atomtype, see the labels, and may hence NOT be in input order)

 AtomType  Orbital  Atom                   E (au)                        E (eV)
 --------  -------  ----           --------------------        ----------------
 C           1S        1          -0.10058479630812E+02                -273.705


 =======================================
 M U L L I K E N   P O P U L A T I O N S
 =======================================
  
 The survey below gives for each atom:
 a) the total charge (Z minus electrons)
 b) the net spin polarization (nr of electrons spin-A minus spin-B)
 c) for each spin the atomic electron valence density (integrated) per L-value.

 Atom              Charge    Spin density          S         P         D         F
 ----              ------    ------------       ------    ------    ------    ------
 1 C               0.0000                       2.0000    2.0000    0.0000    0.0000

 Populations of individual BAS functions
 ----------------------------------------
 1 C            0.0007  0.9631  1.0755 -0.0394  0.1731  0.1731  0.1731  0.3899  0.3899  0.3899
                0.1037  0.1037  0.1037  0.0000  0.0000  0.0000  0.0000  0.0000  0.0000  0.0000
                0.0000  0.0000  0.0000  0.0000  0.0000  0.0000  0.0000  0.0000  0.0000

 Gross Charges per Atom (Z minus electrons)
 ==========================================
             0.0000
 Net Total:  0.00000000


 =======================================================================
 Electrostatic potential at the Nuclei due to electrons and other nuclei
 =======================================================================
  
         Atom                  Potential
         ----                  ---------
     1)   C                  14.62071621
 
 
 ========================
 No memory problems found
 ========================
 
 Maximum number of active allocate calls:         493
 
 *******************************************************************************

                             A D F   E X I T
 NORMAL TERMINATION


 =================
 Timing Statistics
 =================
  
 Total Used :                     CPU=        0.29      System=        0.02     Elapsed=        0.37

 Calls  Section                     ( Mean, Percentage )
 ---------------------------------------------------------------------------------------------------
     3  ><      ................      0.00    0.17             0.00    1.64             0.00    0.80
     1  INIT    ................      0.01    2.71             0.01   38.14             0.03    6.96
     1  GEOMET  ................      0.01    1.93             0.00    5.89             0.01    3.35
     1  INPUTA  ................      0.00    0.34             0.00    3.45             0.00    0.65
     1  MAINSY  ................      0.01    2.46             0.00    0.58             0.01    3.44
     1  SYMFIT  ................      0.00    0.29             0.00    0.00             0.00    0.23
     1  CORORT  ................      0.00    0.25             0.00    0.00             0.00    0.56
     1  SYMORB  ................      0.00    0.28             0.00    0.00             0.00    0.22
     1  FITINT  ................      0.01    3.04             0.00    0.00             0.01    2.77
     1  CLSMAT  ................      0.00    0.11             0.00    0.00             0.00    0.44
     1  ORTHON  ................      0.00    0.00             0.00    6.09             0.00    0.61
     1  GENPT   ................      0.01    2.65             0.00    3.77             0.01    2.95
     1  PTBAS   ................      0.00    1.15             0.00    0.00             0.00    1.28
    11  FOCKY   ................      0.02   68.07             0.00   28.62             0.02   56.30
    11  FOCKTR  ................      0.00    2.17             0.00    1.22             0.00    1.79
    11  SDIIS   ................      0.00    3.70             0.00   10.60             0.00    7.92
     1  COREPS  ................      0.01    4.63             0.00    0.00             0.01    3.67
     1  POPAN   ................      0.00    1.31             0.00    0.00             0.01    1.43
     1  DEBYE   ................      0.00    0.16             0.00    0.00             0.00    0.42
     1  EXIT PROCEDURE .........      0.01    4.59             0.00    0.00             0.02    4.21


 Currently Open Files (EXIT00)
 ====================

 Unit    Access Format  Status   Type       Ident (file)
 -------------------------------------------------------
   3      SEQ    FORM   TRANSP  NORMAL      LOGFILE
                                          ( logfile )


 Buffered I/O statistics
 =======================
 Memory available:                     67108864
 Number of records fitting in memory:     16131
 Input :   0.1% of                        30338  *4k bytes
 Output:  15.9% of                         1476  *4k bytes
 Records from serial files evicted:           0
                    others evicted:           0
 Hash table lookups:      78517 with          0 conflicts (  0.00%)

 ***************************************************************************************************
 (LOGFILE)
 <Dec08-2020> <02:12:43>  DIRAC 2017  RunTime: Dec08-2020 02:12:43  Nodes: 1  Procs: 1
 <Dec08-2020> <02:12:43>  NORMAL TERMINATION
 <Dec08-2020> <02:12:43>  END
 <Dec08-2020> <02:12:44>  ADF 2017  RunTime: Dec08-2020 02:12:44  Nodes: 1  Procs: 1
 <Dec08-2020> <02:12:44>  Hydrogen (TZ2P)
 <Dec08-2020> <02:12:44>  RunType   : CREATE
 <Dec08-2020> <02:12:44>  Net Charge: 0 (Nuclei minus Electrons)
 <Dec08-2020> <02:12:44>  Symmetry  : ATOM
  Coordinates
    Atom         X           Y           Z   (Angstrom)
    1.H         0.000000    0.000000    0.000000
 <Dec08-2020> <02:12:44>  >>>> CORORT
 <Dec08-2020> <02:12:44>  >>>> FITINT
 <Dec08-2020> <02:12:44>  >>>> CLSMAT
 <Dec08-2020> <02:12:44>  >>>> ORTHON
 <Dec08-2020> <02:12:44>  >>>> GENPT
 <Dec08-2020> <02:12:44>  Block Length=  64
 <Dec08-2020> <02:12:44>  >>>> PTBAS
 <Dec08-2020> <02:12:44>  >>>> CYCLE
 <Dec08-2020> <02:12:44>              |Error|         MaxErr       Wt(A-DIIS)
 <Dec08-2020> <02:12:44>      1      0.00000000      0.00000000
 <Dec08-2020> <02:12:44>      2      0.03155047      0.03012130
 <Dec08-2020> <02:12:44>      3      0.00862036      0.00834572    100.0
 <Dec08-2020> <02:12:44>      4      0.00173320      0.00171953      0.7
 <Dec08-2020> <02:12:44>      5      0.00004372      0.00003982      0.0
 <Dec08-2020> <02:12:44>      6      0.00000239      0.00000216      0.0
 <Dec08-2020> <02:12:44>      7      0.00000001      0.00000001      0.0
 <Dec08-2020> <02:12:44>  SCF converged
 <Dec08-2020> <02:12:44>      8      0.00000000      0.00000000      0.0
 <Dec08-2020> <02:12:44>  >>>> POPAN
 <Dec08-2020> <02:12:44>  >>>> DEBYE
 <Dec08-2020> <02:12:44>  NORMAL TERMINATION
 <Dec08-2020> <02:12:44>  END
 <Dec08-2020> <02:12:45>  DIRAC 2017  RunTime: Dec08-2020 02:12:45  Nodes: 1  Procs: 1
 <Dec08-2020> <02:12:45>  NORMAL TERMINATION
 <Dec08-2020> <02:12:45>  END
 <Dec08-2020> <02:12:45>  ADF 2017  RunTime: Dec08-2020 02:12:45  Nodes: 1  Procs: 1
 <Dec08-2020> <02:12:45>  Oxygen (TZ2P, 1s frozen)
 <Dec08-2020> <02:12:45>  RunType   : CREATE
 <Dec08-2020> <02:12:45>  Net Charge: 0 (Nuclei minus Electrons)
 <Dec08-2020> <02:12:45>  Symmetry  : ATOM
  Coordinates
    Atom         X           Y           Z   (Angstrom)
    1.O         0.000000    0.000000    0.000000
 <Dec08-2020> <02:12:45>  >>>> CORORT
 <Dec08-2020> <02:12:45>  >>>> FITINT
 <Dec08-2020> <02:12:45>  >>>> CLSMAT
 <Dec08-2020> <02:12:45>  >>>> ORTHON
 <Dec08-2020> <02:12:45>  >>>> GENPT
 <Dec08-2020> <02:12:45>  Block Length=  68
 <Dec08-2020> <02:12:45>  >>>> PTBAS
 <Dec08-2020> <02:12:45>  >>>> CYCLE
 <Dec08-2020> <02:12:45>              |Error|         MaxErr       Wt(A-DIIS)
 <Dec08-2020> <02:12:45>      1      0.00000000      0.00000000
 <Dec08-2020> <02:12:45>      2      4.56280807      2.52888343
 <Dec08-2020> <02:12:45>      3      2.72317801      1.79878158    100.0
 <Dec08-2020> <02:12:45>      4      0.28879875      0.13053138    100.0
 <Dec08-2020> <02:12:45>      5      0.41607941      0.23236140    100.0
 <Dec08-2020> <02:12:45>      6      0.01362798      0.00666521      5.7
 <Dec08-2020> <02:12:45>      7      0.00108790      0.00062494      0.0
 <Dec08-2020> <02:12:45>      8      0.00003517      0.00001984      0.0
 <Dec08-2020> <02:12:45>      9      0.00000033      0.00000018      0.0
 <Dec08-2020> <02:12:45>     10      0.00000000      0.00000000      0.0
 <Dec08-2020> <02:12:45>  SCF converged
 <Dec08-2020> <02:12:45>     11      0.00000000      0.00000000      0.0
 <Dec08-2020> <02:12:45>  >>>> POPAN
 <Dec08-2020> <02:12:45>  >>>> DEBYE
 <Dec08-2020> <02:12:45>  NORMAL TERMINATION
 <Dec08-2020> <02:12:45>  END
 <Dec08-2020> <02:12:45>  DIRAC 2017  RunTime: Dec08-2020 02:12:45  Nodes: 1  Procs: 1
 <Dec08-2020> <02:12:45>  NORMAL TERMINATION
 <Dec08-2020> <02:12:45>  END
 <Dec08-2020> <02:12:45>  ADF 2017  RunTime: Dec08-2020 02:12:45  Nodes: 1  Procs: 1
 <Dec08-2020> <02:12:45>  Carbon (TZ2P, 1s frozen)
 <Dec08-2020> <02:12:45>  RunType   : CREATE
 <Dec08-2020> <02:12:45>  Net Charge: 0 (Nuclei minus Electrons)
 <Dec08-2020> <02:12:45>  Symmetry  : ATOM
  Coordinates
    Atom         X           Y           Z   (Angstrom)
    1.C         0.000000    0.000000    0.000000
 <Dec08-2020> <02:12:45>  >>>> CORORT
 <Dec08-2020> <02:12:45>  >>>> FITINT
 <Dec08-2020> <02:12:45>  >>>> CLSMAT
 <Dec08-2020> <02:12:45>  >>>> ORTHON
 <Dec08-2020> <02:12:45>  >>>> GENPT
 <Dec08-2020> <02:12:45>  Block Length=  72
 <Dec08-2020> <02:12:45>  >>>> PTBAS
 <Dec08-2020> <02:12:45>  >>>> CYCLE
 <Dec08-2020> <02:12:45>              |Error|         MaxErr       Wt(A-DIIS)
 <Dec08-2020> <02:12:45>      1      0.00000000      0.00000000
 <Dec08-2020> <02:12:45>      2      1.58839989      1.24395935
 <Dec08-2020> <02:12:46>      3      0.83516493      0.69695972    100.0
 <Dec08-2020> <02:12:46>      4      0.21193083      0.16988856    100.0
 <Dec08-2020> <02:12:46>      5      0.18480862      0.14967312    100.0
 <Dec08-2020> <02:12:46>      6      0.01647283      0.01323061     12.4
 <Dec08-2020> <02:12:46>      7      0.00190532      0.00154949      0.6
 <Dec08-2020> <02:12:46>      8      0.00001410      0.00001137      0.0
 <Dec08-2020> <02:12:46>      9      0.00000037      0.00000031      0.0
 <Dec08-2020> <02:12:46>     10      0.00000000      0.00000000      0.0
 <Dec08-2020> <02:12:46>  SCF converged
 <Dec08-2020> <02:12:46>     11      0.00000000      0.00000000      0.0
 <Dec08-2020> <02:12:46>  >>>> POPAN
 <Dec08-2020> <02:12:46>  >>>> DEBYE
 <Dec08-2020> <02:12:46>  NORMAL TERMINATION
 <Dec08-2020> <02:12:46>  END
NORMAL TERMINATION


 Parallel Execution: Process Information
 ==============================================================================
 Rank   Node Name                              NodeID   MyNodeRank  NodeMaster
    0   r11n25.lisa.surfsara.nl                   0          0          0
    1   r11n25.lisa.surfsara.nl                   0          1         -1
    2   r11n25.lisa.surfsara.nl                   0          2         -1
    3   r11n25.lisa.surfsara.nl                   0          3         -1
    4   r11n25.lisa.surfsara.nl                   0          4         -1
    5   r11n25.lisa.surfsara.nl                   0          5         -1
    6   r11n25.lisa.surfsara.nl                   0          6         -1
    7   r11n25.lisa.surfsara.nl                   0          7         -1
    8   r12n9.lisa.surfsara.nl                    1          0          1
    9   r12n9.lisa.surfsara.nl                    1          1         -1
   10   r12n9.lisa.surfsara.nl                    1          2         -1
   11   r12n9.lisa.surfsara.nl                    1          3         -1
   12   r12n9.lisa.surfsara.nl                    1          4         -1
   13   r12n9.lisa.surfsara.nl                    1          5         -1
   14   r12n9.lisa.surfsara.nl                    1          6         -1
   15   r12n9.lisa.surfsara.nl                    1          7         -1
 ==============================================================================


May use up to 45443MB of RAM as shared memory on node 0
May use up to 45443MB of RAM as shared memory on node 1


ATOMS
      1.C           0.0000    0.0000   -0.5918
      2.C          -1.2975    0.0000    0.1566
      3.C           1.2975   -0.0000    0.1566
      4.O           0.0000   -0.0000   -1.8134
      5.H           1.3592    0.9049    0.7966
      6.H           2.1572    0.0000   -0.5472
      7.H           1.3592   -0.9049    0.7966
      8.H          -1.3592   -0.9049    0.7966
      9.H          -1.3592    0.9049    0.7966
     10.H          -2.1572   -0.0000   -0.5472
END

NUMERICALQUALITY Good

SYMMETRY NOSYM

Unrestricted

CHARGE {0 {0}}

noncollinear

HartreeFock

NoPrint LogFile

XC
  GGA PBE
END

RELATIVISTIC Scalar ZORA

GEOMETRY
    optim Delocalized
    iterations 10000
END

SCF
  converge 1.0e-8 1.0e-6
  diis ok=0.01
  iterations 10000
END

Fragments
H t21.H
O t21.O
C t21.C
End
end input

 *******************************************************************************
 *                                                                             *
 *  -------------------------------------                                      *
 *   Amsterdam Density Functional  (ADF)         2017                          *
 *  -------------------------------------                                      *
 *                                               r58813 2017-04-12             *
 *                                                                             *
 *                                                                             *
 *                              =================                              *
 *                              |               |                              *
 *                              |     A D F     |                              *
 *                              |               |                              *
 *                              =================                              *
 *                                                                             *
 *                                                                             *
 *   Online information and documentation:  https://www.scm.com/support/       *
 *   E-mail:  support@scm.com   info@scm.com                                   *
 *                                                                             *
 *   Scientific publications using ADF results must be properly referenced     *
 *   See the User Manuals (or the web site) for recommended citations          *
 *   The terms and conditions of the End User License Agreement apply to       *
 *   the use of ADF, https://www.scm.com/license-terms/                        *
 *                                                                             *
 **********************  x86_64_linux_intel / intelmpi  ************************
 
 Licensed to: SURF-SARA, Comp. & Networking Services / Amsterdam / NL
 SCM User ID: u7409
  
 ADF 2017  RunTime: Dec08-2020 02:12:48  Nodes: 2  Procs: 16

 Temporary files are created in /scratch/kid_0.JAV733


Communication costs MPI_COMM_WORLD:  21952.428 usec per message,  18.5918 usec per 8-byte item
Communication costs for intra-node:  19869.415 usec per message,  15.5072 usec per 8-byte item

 *** (NO TITLE) ***


 ===========================
 A T T A C H E D   F I L E S
 ===========================
  


 ===============================
 M O D E L   P A R A M E T E R S
 ===============================
  
 DENSITY FUNCTIONAL POTENTIAL (scf)
    LDA:                               PW92                                    == Not Default ==
    Gradient Corrections:              PBEc PBEx                               == Not Default ==

 SPIN  (restricted / unrestr.)
    Molecule:                          UNrestricted                            == Not Default ==
    Fragments:                         Restricted                               

 OTHER ASPECTS
    Relativistic Corrections:          scalar (ZORA,MAPA)                      == Not Default ==

    Nuclear Charge Density Model:      Point Charge Nuclei                      
    Core Treatment:                    Frozen Orbital(s)                        

    Hyperfine or Zeeman Interaction:   ---                                      


 Fragment File(s)
 ----------------
 C:
         file : t21.C
         jobid: ADF 2017  RunTime: Dec08-2020 02:12:45  Nodes: 1  Procs: 1
         title: Carbon (TZ2P, 1s frozen)
 O:
         file : t21.O
         jobid: ADF 2017  RunTime: Dec08-2020 02:12:45  Nodes: 1  Procs: 1
         title: Oxygen (TZ2P, 1s frozen)
 H:
         file : t21.H
         jobid: ADF 2017  RunTime: Dec08-2020 02:12:44  Nodes: 1  Procs: 1
         title: Hydrogen (TZ2P)


                                   *********************************************
                                   *  R U N   T Y P E : GEOMETRY OPTIMIZATION  *
                                   *********************************************
  


 ===============
 G E O M E T R Y  ***  3D  Molecule  ***
 ===============
  

 ATOMS
 =====                            X Y Z                    CHARGE
                                (Angstrom)             Nucl     +Core       At.Mass
                       --------------------------    ----------------       -------
    1  C               0.0000    0.0000   -0.5918      6.00      4.00       12.0000
    2  C              -1.2975    0.0000    0.1566      6.00      4.00       12.0000
    3  C               1.2975    0.0000    0.1566      6.00      4.00       12.0000
    4  O               0.0000    0.0000   -1.8134      8.00      6.00       15.9949
    5  H               1.3592    0.9049    0.7966      1.00      1.00        1.0078
    6  H               2.1572    0.0000   -0.5472      1.00      1.00        1.0078
    7  H               1.3592   -0.9049    0.7966      1.00      1.00        1.0078
    8  H              -1.3592   -0.9049    0.7966      1.00      1.00        1.0078
    9  H              -1.3592    0.9049    0.7966      1.00      1.00        1.0078
   10  H              -2.1572    0.0000   -0.5472      1.00      1.00        1.0078


 FRAGMENTS
 =========                                     Atoms in this Fragment     Cart. coord.s (Angstrom)
                                               -------------------------------------------------------
    1  C                                                 1  C            0.0000    0.0000   -0.5918
    2  C                                                 2  C           -1.2975    0.0000    0.1566
    3  C                                                 3  C            1.2975    0.0000    0.1566
    4  O                                                 4  O            0.0000    0.0000   -1.8134
    5  H                                                 5  H            1.3592    0.9049    0.7966
    6  H                                                 6  H            2.1572    0.0000   -0.5472
    7  H                                                 7  H            1.3592   -0.9049    0.7966
    8  H                                                 8  H           -1.3592   -0.9049    0.7966
    9  H                                                 9  H           -1.3592    0.9049    0.7966
   10  H                                                10  H           -2.1572    0.0000   -0.5472


 Interatomic Distance Matrix (Angstrom)
 --------------------------------------

   1)     0.000
   2)     1.498   0.000
   3)     1.498   2.595   0.000
   4)     1.222   2.359   2.359   0.000
   5)     2.143   2.879   1.110   3.079   0.000
   6)     2.158   3.526   1.111   2.501   1.806   0.000
   7)     2.143   2.879   1.110   3.079   1.810   1.806   0.000
   8)     2.143   1.110   2.879   3.079   3.266   3.872   2.718   0.000
   9)     2.143   1.110   2.879   3.079   2.718   3.872   3.266   1.810   0.000
  10)     2.158   1.111   3.526   2.501   3.872   4.314   3.872   1.806   1.806   0.000

 Min. Distance =    1.1101
 Max. Distance =    4.3144


 =====================================
 S Y M M E T R Y ,   E L E C T R O N S
 =====================================
  
 Symmetry: NOSYM

 Irreducible Representations, including subspecies
 -------------------------------------------------
 A


 Configuration of Valence Electrons
 ==================================
 ( determined in the SCF procedure )

 Total:   12 (Spin-A)  + 12 (Spin-B)

 Net Charge: 0 (Nuclei minus Electrons)
 Spin polar: 0 (Spin_A minus Spin_B electrons)

 Aufbau principle for MO occupations will be applied through SCF cycle no.    5000
 Thereafter, the program will assign electrons to MOs that are spatially
 similar to the occupied MOs in a "reference" cycle ("KeepOrbitals").
 The reference cycle is always the PREVIOUS cycle: it will evolve with
 the SCF procedure.
1
 ***************************************************************************************************


                                      ****************************************
                                      *  B U I L D : (Fragments, Functions)  *
                                      ****************************************
  


 =======
 S F O s  ***  (Symmetrized Fragment Orbitals)  ***
 =======
  
 SFOs are linear combinations of (valence) Fragment Orbitals (FOs), such that the SFOs transform as the
 irreducible representations of the (molecular) symmetry group. Each SFO is therefore characterized by
 an irrep of the molecule and by a few (or only one) generating FOs.
 The SFOs constitute a symmetry-adapted basis for the Fock matrix. The MO eigenvector coefficients in
 this basis provide a direct interpretation of the MOs in terms of Frontier Orbital Theory.

 The SFOs are combined with auxiliary Core Functions (CFs) to ensure orthogonalization on the (frozen)
 Core Orbitals (COs). The Core-orthogonalized SFOs (CSFOs) constitute the true Fock basis.

 The FOs, and hence also the (C)SFOs are combinations of the elementary basis functions (BAS). The basis
 functions that participate in the description of the SFOs depend on the irrep. The indices of the
 involved functions are printed below for each irrep.
 (The complete list of primitive basis functions is printed in another section)

 Total nr. of (C)SFOs (summation over all irreps) :   162

 NOTE: a (C)SFO that is defined as a combination of more than one FO is usually NOT normalized.


                                       === A ===
 Nr. of SFOs :  162
 Cartesian basis functions that participate in this irrep (total number =   188) :
      1    30    59    88     2     3     4     5     8    11
      6     9    12     7    10    13    14    15    16    17
     18    19    20    21    22    23    24    25    26    27
     28    29    31    32    33    34    37    40    35    38
     41    36    39    42    43    44    45    46    47    48
     49    50    51    52    53    54    55    56    57    58
     60    61    62    63    66    69    64    67    70    65
     68    71    72    73    74    75    76    77    78    79
     80    81    82    83    84    85    86    87    89    90
     91    92    95    98    93    96    99    94    97   100
    101   102   103   104   105   106   107   108   109   110
    111   112   113   114   115   116   117   118   119   120
    121   122   123   124   125   126   127   128   129   130
    131   132   133   134   135   136   137   138   139   140
    141   142   143   144   145   146   147   148   149   150
    151   152   153   154   155   156   157   158   159   160
    161   162   163   164   165   166   167   168   169   170
    171   172   173   174   175   176   177   178   179   180
    181   182   183   184   185   186   187   188

    SFO  (index         Fragment          Generating    Expansion in Fragment Orbitals
  indx  incl.CFs)   Occup   Orb.Energy   FragmentType  Coeff.   Orbital     on Fragment
 --------------------------------------------------------------------------------------
     1       5      2.000      -0.507 au  C             1.00      1 S               1
                        (     -13.801 eV)
     2       6       --         0.435 au  C             1.00      2 S               1
                        (      11.837 eV)
     3       7       --         9.943 au  C             1.00      3 S               1
                        (     270.574 eV)
     4       8      0.667      -0.196 au  C             1.00      1 P:x             1
                        (      -5.325 eV)
     5       9       --         0.171 au  C             1.00      2 P:x             1
                        (       4.656 eV)
     6      10       --         2.025 au  C             1.00      3 P:x             1
                        (      55.112 eV)
     7      11      0.667      -0.196 au  C             1.00      1 P:y             1
                        (      -5.325 eV)
     8      12       --         0.171 au  C             1.00      2 P:y             1
                        (       4.656 eV)
     9      13       --         2.025 au  C             1.00      3 P:y             1
                        (      55.112 eV)
    10      14      0.667      -0.196 au  C             1.00      1 P:z             1
                        (      -5.325 eV)
    11      15       --         0.171 au  C             1.00      2 P:z             1
                        (       4.656 eV)
    12      16       --         2.025 au  C             1.00      3 P:z             1
                        (      55.112 eV)
    13      17       --         1.235 au  C             1.00      1 D:z2            1
                        (      33.593 eV)
    14      18       --         1.235 au  C             1.00      1 D:x2-y2         1
                        (      33.593 eV)
    15      19       --         1.235 au  C             1.00      1 D:xy            1
                        (      33.593 eV)
    16      20       --         1.235 au  C             1.00      1 D:xz            1
                        (      33.593 eV)
    17      21       --         1.235 au  C             1.00      1 D:yz            1
                        (      33.593 eV)
    18      22       --         4.008 au  C             1.00      1 F:z3            1
                        (     109.051 eV)
    19      23       --         4.008 au  C             1.00      1 F:z             1
                        (     109.051 eV)
    20      24       --         4.008 au  C             1.00      1 F:xyz           1
                        (     109.051 eV)
    21      25       --         4.008 au  C             1.00      1 F:z2x           1
                        (     109.051 eV)
    22      26       --         4.008 au  C             1.00      1 F:z2y           1
                        (     109.051 eV)
    23      27       --         4.008 au  C             1.00      1 F:x             1
                        (     109.051 eV)
    24      28       --         4.008 au  C             1.00      1 F:y             1
                        (     109.051 eV)
    25      29      2.000      -0.507 au  C             1.00      1 S               2
                        (     -13.801 eV)
    26      30       --         0.435 au  C             1.00      2 S               2
                        (      11.837 eV)
    27      31       --         9.943 au  C             1.00      3 S               2
                        (     270.574 eV)
    28      32      0.667      -0.196 au  C             1.00      1 P:x             2
                        (      -5.325 eV)
    29      33       --         0.171 au  C             1.00      2 P:x             2
                        (       4.656 eV)
    30      34       --         2.025 au  C             1.00      3 P:x             2
                        (      55.112 eV)
    31      35      0.667      -0.196 au  C             1.00      1 P:y             2
                        (      -5.325 eV)
    32      36       --         0.171 au  C             1.00      2 P:y             2
                        (       4.656 eV)
    33      37       --         2.025 au  C             1.00      3 P:y             2
                        (      55.112 eV)
    34      38      0.667      -0.196 au  C             1.00      1 P:z             2
                        (      -5.325 eV)
    35      39       --         0.171 au  C             1.00      2 P:z             2
                        (       4.656 eV)
    36      40       --         2.025 au  C             1.00      3 P:z             2
                        (      55.112 eV)
    37      41       --         1.235 au  C             1.00      1 D:z2            2
                        (      33.593 eV)
    38      42       --         1.235 au  C             1.00      1 D:x2-y2         2
                        (      33.593 eV)
    39      43       --         1.235 au  C             1.00      1 D:xy            2
                        (      33.593 eV)
    40      44       --         1.235 au  C             1.00      1 D:xz            2
                        (      33.593 eV)
    41      45       --         1.235 au  C             1.00      1 D:yz            2
                        (      33.593 eV)
    42      46       --         4.008 au  C             1.00      1 F:z3            2
                        (     109.051 eV)
    43      47       --         4.008 au  C             1.00      1 F:z             2
                        (     109.051 eV)
    44      48       --         4.008 au  C             1.00      1 F:xyz           2
                        (     109.051 eV)
    45      49       --         4.008 au  C             1.00      1 F:z2x           2
                        (     109.051 eV)
    46      50       --         4.008 au  C             1.00      1 F:z2y           2
                        (     109.051 eV)
    47      51       --         4.008 au  C             1.00      1 F:x             2
                        (     109.051 eV)
    48      52       --         4.008 au  C             1.00      1 F:y             2
                        (     109.051 eV)
    49      53      2.000      -0.507 au  C             1.00      1 S               3
                        (     -13.801 eV)
    50      54       --         0.435 au  C             1.00      2 S               3
                        (      11.837 eV)
    51      55       --         9.943 au  C             1.00      3 S               3
                        (     270.574 eV)
    52      56      0.667      -0.196 au  C             1.00      1 P:x             3
                        (      -5.325 eV)
    53      57       --         0.171 au  C             1.00      2 P:x             3
                        (       4.656 eV)
    54      58       --         2.025 au  C             1.00      3 P:x             3
                        (      55.112 eV)
    55      59      0.667      -0.196 au  C             1.00      1 P:y             3
                        (      -5.325 eV)
    56      60       --         0.171 au  C             1.00      2 P:y             3
                        (       4.656 eV)
    57      61       --         2.025 au  C             1.00      3 P:y             3
                        (      55.112 eV)
    58      62      0.667      -0.196 au  C             1.00      1 P:z             3
                        (      -5.325 eV)
    59      63       --         0.171 au  C             1.00      2 P:z             3
                        (       4.656 eV)
    60      64       --         2.025 au  C             1.00      3 P:z             3
                        (      55.112 eV)
    61      65       --         1.235 au  C             1.00      1 D:z2            3
                        (      33.593 eV)
    62      66       --         1.235 au  C             1.00      1 D:x2-y2         3
                        (      33.593 eV)
    63      67       --         1.235 au  C             1.00      1 D:xy            3
                        (      33.593 eV)
    64      68       --         1.235 au  C             1.00      1 D:xz            3
                        (      33.593 eV)
    65      69       --         1.235 au  C             1.00      1 D:yz            3
                        (      33.593 eV)
    66      70       --         4.008 au  C             1.00      1 F:z3            3
                        (     109.051 eV)
    67      71       --         4.008 au  C             1.00      1 F:z             3
                        (     109.051 eV)
    68      72       --         4.008 au  C             1.00      1 F:xyz           3
                        (     109.051 eV)
    69      73       --         4.008 au  C             1.00      1 F:z2x           3
                        (     109.051 eV)
    70      74       --         4.008 au  C             1.00      1 F:z2y           3
                        (     109.051 eV)
    71      75       --         4.008 au  C             1.00      1 F:x             3
                        (     109.051 eV)
    72      76       --         4.008 au  C             1.00      1 F:y             3
                        (     109.051 eV)
    73      77      2.000      -0.883 au  O             1.00      1 S               4
                        (     -24.021 eV)
    74      78       --         0.906 au  O             1.00      2 S               4
                        (      24.659 eV)
    75      79       --        29.646 au  O             1.00      3 S               4
                        (     806.705 eV)
    76      80      1.333      -0.334 au  O             1.00      1 P:x             4
                        (      -9.088 eV)
    77      81       --         0.352 au  O             1.00      2 P:x             4
                        (       9.588 eV)
    78      82       --         3.835 au  O             1.00      3 P:x             4
                        (     104.368 eV)
    79      83      1.333      -0.334 au  O             1.00      1 P:y             4
                        (      -9.088 eV)
    80      84       --         0.352 au  O             1.00      2 P:y             4
                        (       9.588 eV)
    81      85       --         3.835 au  O             1.00      3 P:y             4
                        (     104.368 eV)
    82      86      1.333      -0.334 au  O             1.00      1 P:z             4
                        (      -9.088 eV)
    83      87       --         0.352 au  O             1.00      2 P:z             4
                        (       9.588 eV)
    84      88       --         3.835 au  O             1.00      3 P:z             4
                        (     104.368 eV)
    85      89       --         1.066 au  O             1.00      1 D:z2            4
                        (      29.007 eV)
    86      90       --         1.066 au  O             1.00      1 D:x2-y2         4
                        (      29.007 eV)
    87      91       --         1.066 au  O             1.00      1 D:xy            4
                        (      29.007 eV)
    88      92       --         1.066 au  O             1.00      1 D:xz            4
                        (      29.007 eV)
    89      93       --         1.066 au  O             1.00      1 D:yz            4
                        (      29.007 eV)
    90      94       --         3.351 au  O             1.00      1 F:z3            4
                        (      91.190 eV)
    91      95       --         3.351 au  O             1.00      1 F:z             4
                        (      91.190 eV)
    92      96       --         3.351 au  O             1.00      1 F:xyz           4
                        (      91.190 eV)
    93      97       --         3.351 au  O             1.00      1 F:z2x           4
                        (      91.190 eV)
    94      98       --         3.351 au  O             1.00      1 F:z2y           4
                        (      91.190 eV)
    95      99       --         3.351 au  O             1.00      1 F:x             4
                        (      91.190 eV)
    96     100       --         3.351 au  O             1.00      1 F:y             4
                        (      91.190 eV)
    97     101      1.000      -0.239 au  H             1.00      1 S               5
                        (      -6.494 eV)
    98     102       --         0.091 au  H             1.00      2 S               5
                        (       2.470 eV)
    99     103       --         1.522 au  H             1.00      3 S               5
                        (      41.412 eV)
   100     104       --         0.405 au  H             1.00      1 P:x             5
                        (      11.031 eV)
   101     105       --         0.405 au  H             1.00      1 P:y             5
                        (      11.031 eV)
   102     106       --         0.405 au  H             1.00      1 P:z             5
                        (      11.031 eV)
   103     107       --         2.566 au  H             1.00      1 D:z2            5
                        (      69.819 eV)
   104     108       --         2.566 au  H             1.00      1 D:x2-y2         5
                        (      69.819 eV)
   105     109       --         2.566 au  H             1.00      1 D:xy            5
                        (      69.819 eV)
   106     110       --         2.566 au  H             1.00      1 D:xz            5
                        (      69.819 eV)
   107     111       --         2.566 au  H             1.00      1 D:yz            5
                        (      69.819 eV)
   108     112      1.000      -0.239 au  H             1.00      1 S               6
                        (      -6.494 eV)
   109     113       --         0.091 au  H             1.00      2 S               6
                        (       2.470 eV)
   110     114       --         1.522 au  H             1.00      3 S               6
                        (      41.412 eV)
   111     115       --         0.405 au  H             1.00      1 P:x             6
                        (      11.031 eV)
   112     116       --         0.405 au  H             1.00      1 P:y             6
                        (      11.031 eV)
   113     117       --         0.405 au  H             1.00      1 P:z             6
                        (      11.031 eV)
   114     118       --         2.566 au  H             1.00      1 D:z2            6
                        (      69.819 eV)
   115     119       --         2.566 au  H             1.00      1 D:x2-y2         6
                        (      69.819 eV)
   116     120       --         2.566 au  H             1.00      1 D:xy            6
                        (      69.819 eV)
   117     121       --         2.566 au  H             1.00      1 D:xz            6
                        (      69.819 eV)
   118     122       --         2.566 au  H             1.00      1 D:yz            6
                        (      69.819 eV)
   119     123      1.000      -0.239 au  H             1.00      1 S               7
                        (      -6.494 eV)
   120     124       --         0.091 au  H             1.00      2 S               7
                        (       2.470 eV)
   121     125       --         1.522 au  H             1.00      3 S               7
                        (      41.412 eV)
   122     126       --         0.405 au  H             1.00      1 P:x             7
                        (      11.031 eV)
   123     127       --         0.405 au  H             1.00      1 P:y             7
                        (      11.031 eV)
   124     128       --         0.405 au  H             1.00      1 P:z             7
                        (      11.031 eV)
   125     129       --         2.566 au  H             1.00      1 D:z2            7
                        (      69.819 eV)
   126     130       --         2.566 au  H             1.00      1 D:x2-y2         7
                        (      69.819 eV)
   127     131       --         2.566 au  H             1.00      1 D:xy            7
                        (      69.819 eV)
   128     132       --         2.566 au  H             1.00      1 D:xz            7
                        (      69.819 eV)
   129     133       --         2.566 au  H             1.00      1 D:yz            7
                        (      69.819 eV)
   130     134      1.000      -0.239 au  H             1.00      1 S               8
                        (      -6.494 eV)
   131     135       --         0.091 au  H             1.00      2 S               8
                        (       2.470 eV)
   132     136       --         1.522 au  H             1.00      3 S               8
                        (      41.412 eV)
   133     137       --         0.405 au  H             1.00      1 P:x             8
                        (      11.031 eV)
   134     138       --         0.405 au  H             1.00      1 P:y             8
                        (      11.031 eV)
   135     139       --         0.405 au  H             1.00      1 P:z             8
                        (      11.031 eV)
   136     140       --         2.566 au  H             1.00      1 D:z2            8
                        (      69.819 eV)
   137     141       --         2.566 au  H             1.00      1 D:x2-y2         8
                        (      69.819 eV)
   138     142       --         2.566 au  H             1.00      1 D:xy            8
                        (      69.819 eV)
   139     143       --         2.566 au  H             1.00      1 D:xz            8
                        (      69.819 eV)
   140     144       --         2.566 au  H             1.00      1 D:yz            8
                        (      69.819 eV)
   141     145      1.000      -0.239 au  H             1.00      1 S               9
                        (      -6.494 eV)
   142     146       --         0.091 au  H             1.00      2 S               9
                        (       2.470 eV)
   143     147       --         1.522 au  H             1.00      3 S               9
                        (      41.412 eV)
   144     148       --         0.405 au  H             1.00      1 P:x             9
                        (      11.031 eV)
   145     149       --         0.405 au  H             1.00      1 P:y             9
                        (      11.031 eV)
   146     150       --         0.405 au  H             1.00      1 P:z             9
                        (      11.031 eV)
   147     151       --         2.566 au  H             1.00      1 D:z2            9
                        (      69.819 eV)
   148     152       --         2.566 au  H             1.00      1 D:x2-y2         9
                        (      69.819 eV)
   149     153       --         2.566 au  H             1.00      1 D:xy            9
                        (      69.819 eV)
   150     154       --         2.566 au  H             1.00      1 D:xz            9
                        (      69.819 eV)
   151     155       --         2.566 au  H             1.00      1 D:yz            9
                        (      69.819 eV)
   152     156      1.000      -0.239 au  H             1.00      1 S              10
                        (      -6.494 eV)
   153     157       --         0.091 au  H             1.00      2 S              10
                        (       2.470 eV)
   154     158       --         1.522 au  H             1.00      3 S              10
                        (      41.412 eV)
   155     159       --         0.405 au  H             1.00      1 P:x            10
                        (      11.031 eV)
   156     160       --         0.405 au  H             1.00      1 P:y            10
                        (      11.031 eV)
   157     161       --         0.405 au  H             1.00      1 P:z            10
                        (      11.031 eV)
   158     162       --         2.566 au  H             1.00      1 D:z2           10
                        (      69.819 eV)
   159     163       --         2.566 au  H             1.00      1 D:x2-y2        10
                        (      69.819 eV)
   160     164       --         2.566 au  H             1.00      1 D:xy           10
                        (      69.819 eV)
   161     165       --         2.566 au  H             1.00      1 D:xz           10
                        (      69.819 eV)
   162     166       --         2.566 au  H             1.00      1 D:yz           10
                        (      69.819 eV)


 ================================
 (Slater-type)  F U N C T I O N S  ***  (Basis and Fit)  ***
 ================================
  

 Atom Type    1  (C)
 ==============

 Valence Basis Sets:   9
 -----------------------
   1 S    5.400000
   2 S    1.280000
   2 S    2.100000
   2 S    4.600000
   2 P    0.820000
   2 P    1.480000
   2 P    2.940000
   3 D    2.200000
   4 F    3.300000

 Frozen Core Shells
 ------------------
    S:  1

 Atom Type    2  (O)
 ==============

 Valence Basis Sets:   9
 -----------------------
   1 S    7.360000
   2 S    1.720000
   2 S    2.880000
   2 S    7.580000
   2 P    1.120000
   2 P    2.080000
   2 P    4.080000
   3 D    2.000000
   4 F    3.000000

 Frozen Core Shells
 ------------------
    S:  1

 Atom Type    3  (H)
 ==============

 Valence Basis Sets:   5
 -----------------------
   1 S    0.690000
   1 S    0.920000
   1 S    1.580000
   2 P    1.250000
   3 D    2.500000


 BAS: List of all Elementary Cartesian Basis Functions
 =====================================================

 The numbering in the list below (to the right of the function characteristics) is referred
 to in print-outs of MO eigenvectors and Mulliken populations in the BAS representation
 (as contrasted to the SFO representation).

 Notes:
 1. The functions are characterized by a polynomial prefactor (powers of x,y,z and r) and
    an exponential decay factor alpha.
 2. Since the basis sets are specific for an atom TYPE, the individual functions occur on
    all atoms of that type.
 3. The word 'Core' in the left margin signals that it is a Core Function (CF) : not a
    degree of freedom in the valence set, but only used to ensure orthogonalization of
    the other valence basis functions on the frozen Core Orbitals.


 (power of) X  Y  Z  R     Alpha  on Atom
            ==========     =====     ==========

 C                                    1    2    3
                                  ---------------------------------------------------------------------------
    Core    0  0  0  0     5.400      1   30   59
            0  0  0  1     1.280      2   31   60
            0  0  0  1     2.100      3   32   61
            0  0  0  1     4.600      4   33   62
            1  0  0  0     0.820      5   34   63
            0  1  0  0     0.820      6   35   64
            0  0  1  0     0.820      7   36   65
            1  0  0  0     1.480      8   37   66
            0  1  0  0     1.480      9   38   67
            0  0  1  0     1.480     10   39   68
            1  0  0  0     2.940     11   40   69
            0  1  0  0     2.940     12   41   70
            0  0  1  0     2.940     13   42   71
            2  0  0  0     2.200     14   43   72
            1  1  0  0     2.200     15   44   73
            1  0  1  0     2.200     16   45   74
            0  2  0  0     2.200     17   46   75
            0  1  1  0     2.200     18   47   76
            0  0  2  0     2.200     19   48   77
            3  0  0  0     3.300     20   49   78
            2  1  0  0     3.300     21   50   79
            2  0  1  0     3.300     22   51   80
            1  2  0  0     3.300     23   52   81
            1  1  1  0     3.300     24   53   82
            1  0  2  0     3.300     25   54   83
            0  3  0  0     3.300     26   55   84
            0  2  1  0     3.300     27   56   85
            0  1  2  0     3.300     28   57   86
            0  0  3  0     3.300     29   58   87

 O                                    4
                                  ---------------------------------------------------------------------------
    Core    0  0  0  0     7.360     88
            0  0  0  1     1.720     89
            0  0  0  1     2.880     90
            0  0  0  1     7.580     91
            1  0  0  0     1.120     92
            0  1  0  0     1.120     93
            0  0  1  0     1.120     94
            1  0  0  0     2.080     95
            0  1  0  0     2.080     96
            0  0  1  0     2.080     97
            1  0  0  0     4.080     98
            0  1  0  0     4.080     99
            0  0  1  0     4.080    100
            2  0  0  0     2.000    101
            1  1  0  0     2.000    102
            1  0  1  0     2.000    103
            0  2  0  0     2.000    104
            0  1  1  0     2.000    105
            0  0  2  0     2.000    106
            3  0  0  0     3.000    107
            2  1  0  0     3.000    108
            2  0  1  0     3.000    109
            1  2  0  0     3.000    110
            1  1  1  0     3.000    111
            1  0  2  0     3.000    112
            0  3  0  0     3.000    113
            0  2  1  0     3.000    114
            0  1  2  0     3.000    115
            0  0  3  0     3.000    116

 H                                    5    6    7    8    9   10
                                  ---------------------------------------------------------------------------
            0  0  0  0     0.690    117  129  141  153  165  177
            0  0  0  0     0.920    118  130  142  154  166  178
            0  0  0  0     1.580    119  131  143  155  167  179
            1  0  0  0     1.250    120  132  144  156  168  180
            0  1  0  0     1.250    121  133  145  157  169  181
            0  0  1  0     1.250    122  134  146  158  170  182
            2  0  0  0     2.500    123  135  147  159  171  183
            1  1  0  0     2.500    124  136  148  160  172  184
            1  0  1  0     2.500    125  137  149  161  173  185
            0  2  0  0     2.500    126  138  150  162  174  186
            0  1  1  0     2.500    127  139  151  163  175  187
            0  0  2  0     2.500    128  140  152  164  176  188

 Total number of charge fitting functions (nprimf)       628
 Total number of Cartesian basis functions (naos)        188
 Total number of Cartesian core functions  (ncos)          4


 Coordinates (Cartesian)
 =======================

     Atom                    bohr                                 angstrom                 Geometric Variables
                   X           Y           Z              X           Y           Z       (0:frozen, *:LT par.)
 --------------------------------------------------------------------------------------------------------------
     1 C       0.000000    0.000000   -1.118340       0.000000    0.000000   -0.591800      1       2       3
     2 C      -2.451920    0.000000    0.295931      -1.297500    0.000000    0.156600      4       5       6
     3 C       2.451920    0.000000    0.295931       1.297500    0.000000    0.156600      7       8       9
     4 O       0.000000    0.000000   -3.426829       0.000000    0.000000   -1.813400     10      11      12
     5 H       2.568516    1.710013    1.505356       1.359200    0.904900    0.796600     13      14      15
     6 H       4.076517    0.000000   -1.034058       2.157200    0.000000   -0.547200     16      17      18
     7 H       2.568516   -1.710013    1.505356       1.359200   -0.904900    0.796600     19      20      21
     8 H      -2.568516   -1.710013    1.505356      -1.359200   -0.904900    0.796600     22      23      24
     9 H      -2.568516    1.710013    1.505356      -1.359200    0.904900    0.796600     25      26      27
    10 H      -4.076517    0.000000   -1.034058      -2.157200    0.000000   -0.547200     28      29      30
 --------------------------------------------------------------------------------------------------------------
1
 ***************************************************************************************************


                                              ***********************
                                              *  T E C H N I C A L  *
                                              ***********************
  


 =============================================================
 P A R A L L E L I Z A T I O N  and  V E C T O R I Z A T I O N
 =============================================================
  
 Nr of parallel processes:                               16
 Maximum vector length in NumInt loops:                 128

 IO buffersize (Mb):                                     64.000000


 ===============================
 G E O M E T R Y   U P D A T E S
 ===============================
  
 Optimization coordinates:                       Delocalized
 Optimization code branch:                       NEW
 Hessian update method:                          BFGS (Broyden-Fletcher-Goldfarb-Shanno)

 Iterative Geometry Improvements:
    Max. nr. of iterations:                      10000
    Convergence criteria:
         Change in energy (hartree):                 0.0010000000
         Gradients (au/Angstrom):                    0.0010000000
         Cart/bondlength changes (Angstrom):         0.0100000000
    Max. step to take:
         Trust Radius:                               0.2000000000

 GDIIS (Geometry Direct Inversion in Iteration Space):
    First geometry cycle:                            0
    Max. number expansion vectors:                   5


 =====================
 S C F   U P D A T E S
 =====================
  
 Max. nr. of cycles:                             10000
 Convergence criterion:                              0.0000000100
   secondary criterion:                              0.0000010000

 Mix parameter (when DIIS does not apply):           0.2000000000
 Mixed ADIIS+DIIS will be used
    Max number of expansion vectors:                10
    Pure ADIIS when Max([F,P]) is above              0.1000000000
    Pure DIIS when Max([F,P]) is below               0.0010000000


 =================
 P R E C I S I O N  ***  (General: NumInt, NeglectFunctionTails, ...)  ***
 =================
  

 NumInt:           Target precision:                 6.0000000000
 -------           Initial precision:                6.0000000000
                   Min. precision (optimization):    6.0000000000

 Neglect Functions:          Basis functions:        0.1000000000E-07
 ------------------          Fit functions:          0.1000000000E-07


 ===========================
 L I N E A R   S C A L I N G
 ===========================
  

 Cut-off radii density fit:                        0.1000000000E-09
 Overlap cut-off criterion AO matrix elements:     0.1000000000E-07
 Cut-offs for Coulomb potential and fitted density:0.1000000000E-09
 Cut-off criterion for Coulomb multipole terms:    0.1000000000E-09
 Progressive Convergence parameter:                 0.000000000    
1
 ***************************************************************************************************


                                            ***************************
                                            *  C O M P U T A T I O N  *
                                            ***************************
  

 Number of elements of the density matrix on this node (used, total):      1275     17766


 ===========================================
 Numerical Integration : Fuzzy Cells (Becke)
 ===========================================
  
 Becke grid quality: GOOD           
  
 Lebedev angular grid order:             min:  11 max:  31
 Nr. of radial points:                   min:  54 max:  61

 Total nr. of points:     122552
 Nr. of blocks:              958
 Block length:               128
 Nr. of dummy points:         72


 Test of Precision of the Numerical Integration Grid
 ===================================================

 Integral of the Total Core Density:                   8.00000706952771
 Relative Error:                                       8.837E-07


 ========================
 Density Fitting (zlmFit)
 ========================
  
 ZlmFit Fit Quality: GOOD           
  
 Max L-expansion:                        min:   8 max:   9
 Nr. of radial interpolation points:     min:  78 max:  96


 =====
 S C F  ***  ScaSCF  ***
 =====
  
 Initial density matrix is calculated as sum of fragments

 CYCLE    1
 SCF Error: norm([F,P])=      1.737877754635, max([F,P])=      0.118012013429
 ***** SPIN 1 *****
 orbitals (Q,E):
 ---------------
 A :3...22           ( 1.00    -0.8271)  ( 1.00    -0.6485)  ( 1.00    -0.5844)  ( 1.00    -0.5768)
                     ( 1.00    -0.5709)  ( 1.00    -0.5267)  ( 1.00    -0.5169)  ( 1.00    -0.5089)
                     ( 1.00    -0.4691)  ( 1.00    -0.3924)  ( 0.00    -0.1917)  ( 0.00    -0.0663)
                     ( 0.00    -0.0302)  ( 0.00    -0.0257)  ( 0.00    -0.0141)  ( 0.00     0.0037)
                     ( 0.00     0.0082)  ( 0.00     0.0148)  ( 0.00     0.0378)  ( 0.00     0.0698)
 ***** SPIN 2 *****
 orbitals (Q,E):
 ---------------
 A :3...22           ( 1.00    -0.8271)  ( 1.00    -0.6485)  ( 1.00    -0.5844)  ( 1.00    -0.5768)
                     ( 1.00    -0.5709)  ( 1.00    -0.5267)  ( 1.00    -0.5169)  ( 1.00    -0.5089)
                     ( 1.00    -0.4691)  ( 1.00    -0.3924)  ( 0.00    -0.1917)  ( 0.00    -0.0663)
                     ( 0.00    -0.0302)  ( 0.00    -0.0257)  ( 0.00    -0.0141)  ( 0.00     0.0037)
                     ( 0.00     0.0082)  ( 0.00     0.0148)  ( 0.00     0.0378)  ( 0.00     0.0698)
  
 Spin polar: 0 (Spin_A minus Spin_B electrons)

 CYCLE    2
  SDIIS (wt  0.000):  0.3036  0.6964
 A-DIIS (wt  1.000):  0.0000  1.0000
  DIIS coefficients:  0.0000  1.0000
 SCF Error: norm([F,P])=      0.992775524263, max([F,P])=      0.097849259614
 ***** SPIN 1 *****
 orbitals (Q,E):
 ---------------
 A :3...13           ( 1.00    -0.5162)  ( 1.00    -0.3598)  ( 1.00    -0.3219)  ( 1.00    -0.2900)
                     ( 1.00    -0.2738)  ( 1.00    -0.2673)  ( 1.00    -0.2256)  ( 1.00    -0.1845)
                     ( 1.00    -0.1779)  ( 1.00    -0.0196)  ( 0.00     0.0195)
 ***** SPIN 2 *****
 orbitals (Q,E):
 ---------------
 A :3...13           ( 1.00    -0.5162)  ( 1.00    -0.3598)  ( 1.00    -0.3219)  ( 1.00    -0.2900)
                     ( 1.00    -0.2738)  ( 1.00    -0.2673)  ( 1.00    -0.2256)  ( 1.00    -0.1845)
                     ( 1.00    -0.1779)  ( 1.00    -0.0196)  ( 0.00     0.0195)
  
 Spin polar: 0 (Spin_A minus Spin_B electrons)

 CYCLE    3
  SDIIS (wt  0.000):  0.0766  0.6162  0.3072
 A-DIIS (wt  1.000):  0.0000  0.7367  0.2633
  DIIS coefficients:  0.0000  0.7367  0.2633
 SCF Error: norm([F,P])=      1.803714625244, max([F,P])=      0.234754623430
 ***** SPIN 1 *****
 orbitals (Q,E):
 ---------------
 A :3...13           ( 1.00    -0.5952)  ( 1.00    -0.4449)  ( 1.00    -0.3880)  ( 1.00    -0.3766)
                     ( 1.00    -0.3744)  ( 1.00    -0.3212)  ( 1.00    -0.3124)  ( 1.00    -0.2985)
                     ( 1.00    -0.2941)  ( 1.00    -0.1887)  ( 0.00    -0.0436)
 ***** SPIN 2 *****
 orbitals (Q,E):
 ---------------
 A :3...13           ( 1.00    -0.5952)  ( 1.00    -0.4449)  ( 1.00    -0.3880)  ( 1.00    -0.3766)
                     ( 1.00    -0.3744)  ( 1.00    -0.3212)  ( 1.00    -0.3124)  ( 1.00    -0.2985)
                     ( 1.00    -0.2941)  ( 1.00    -0.1887)  ( 0.00    -0.0436)
  
 Spin polar: 0 (Spin_A minus Spin_B electrons)

 CYCLE    4
  SDIIS (wt  0.703):  0.4129  0.1702  0.4169
 A-DIIS (wt  0.297):  0.1602  0.0000  0.8398
  DIIS coefficients:  0.3379  0.1197  0.5424
 SCF Error: norm([F,P])=      0.465500782819, max([F,P])=      0.030382861615
 ***** SPIN 1 *****
 orbitals (Q,E):
 ---------------
 A :3...13           ( 1.00    -0.6721)  ( 1.00    -0.4966)  ( 1.00    -0.4393)  ( 1.00    -0.4304)
                     ( 1.00    -0.4100)  ( 1.00    -0.3870)  ( 1.00    -0.3581)  ( 1.00    -0.3475)
                     ( 1.00    -0.3125)  ( 1.00    -0.2011)  ( 0.00    -0.0662)
 ***** SPIN 2 *****
 orbitals (Q,E):
 ---------------
 A :3...13           ( 1.00    -0.6721)  ( 1.00    -0.4966)  ( 1.00    -0.4393)  ( 1.00    -0.4304)
                     ( 1.00    -0.4100)  ( 1.00    -0.3870)  ( 1.00    -0.3581)  ( 1.00    -0.3475)
                     ( 1.00    -0.3125)  ( 1.00    -0.2011)  ( 0.00    -0.0662)
  
 Spin polar: 0 (Spin_A minus Spin_B electrons)

 CYCLE    5
  SDIIS (wt  0.703):  0.1066 -0.0107  0.4120  0.4921
 A-DIIS (wt  0.297):  0.0000  0.0000  0.2900  0.7100
  DIIS coefficients:  0.0749 -0.0075  0.3758  0.5568
 SCF Error: norm([F,P])=      0.311406505850, max([F,P])=      0.046456810687
 ***** SPIN 1 *****
 orbitals (Q,E):
 ---------------
 A :3...13           ( 1.00    -0.6476)  ( 1.00    -0.4800)  ( 1.00    -0.4205)  ( 1.00    -0.4126)
                     ( 1.00    -0.4044)  ( 1.00    -0.3658)  ( 1.00    -0.3467)  ( 1.00    -0.3388)
                     ( 1.00    -0.3173)  ( 1.00    -0.2113)  ( 0.00    -0.0604)
 ***** SPIN 2 *****
 orbitals (Q,E):
 ---------------
 A :3...13           ( 1.00    -0.6476)  ( 1.00    -0.4800)  ( 1.00    -0.4205)  ( 1.00    -0.4126)
                     ( 1.00    -0.4044)  ( 1.00    -0.3658)  ( 1.00    -0.3467)  ( 1.00    -0.3388)
                     ( 1.00    -0.3173)  ( 1.00    -0.2113)  ( 0.00    -0.0604)
  
 Spin polar: 0 (Spin_A minus Spin_B electrons)

 CYCLE    6
  SDIIS (wt  0.808):  0.0324 -0.0028  0.2043  0.3664  0.3997
 A-DIIS (wt  0.192):  0.0000  0.0000  0.0000  0.1586  0.8414
  DIIS coefficients:  0.0262 -0.0023  0.1652  0.3265  0.4843
 SCF Error: norm([F,P])=      0.120854543625, max([F,P])=      0.019971055823
 ***** SPIN 1 *****
 orbitals (Q,E):
 ---------------
 A :3...13           ( 1.00    -0.6490)  ( 1.00    -0.4802)  ( 1.00    -0.4220)  ( 1.00    -0.4136)
                     ( 1.00    -0.4008)  ( 1.00    -0.3667)  ( 1.00    -0.3436)  ( 1.00    -0.3394)
                     ( 1.00    -0.3119)  ( 1.00    -0.2033)  ( 0.00    -0.0611)
 ***** SPIN 2 *****
 orbitals (Q,E):
 ---------------
 A :3...13           ( 1.00    -0.6490)  ( 1.00    -0.4802)  ( 1.00    -0.4220)  ( 1.00    -0.4136)
                     ( 1.00    -0.4008)  ( 1.00    -0.3667)  ( 1.00    -0.3436)  ( 1.00    -0.3394)
                     ( 1.00    -0.3119)  ( 1.00    -0.2033)  ( 0.00    -0.0611)
  
 Spin polar: 0 (Spin_A minus Spin_B electrons)

 CYCLE    7
  SDIIS (wt  0.938):  0.0028 -0.0023  0.0345  0.0809  0.2986  0.5855
 A-DIIS (wt  0.062):  0.0000  0.0000  0.0000  0.0000  0.1773  0.8227
  DIIS coefficients:  0.0026 -0.0022  0.0323  0.0759  0.2910  0.6003
 SCF Error: norm([F,P])=      0.041945021499, max([F,P])=      0.007149893644
 ***** SPIN 1 *****
 orbitals (Q,E):
 ---------------
 A :3...13           ( 1.00    -0.6488)  ( 1.00    -0.4801)  ( 1.00    -0.4218)  ( 1.00    -0.4135)
                     ( 1.00    -0.4019)  ( 1.00    -0.3666)  ( 1.00    -0.3447)  ( 1.00    -0.3393)
                     ( 1.00    -0.3135)  ( 1.00    -0.2058)  ( 0.00    -0.0611)
 ***** SPIN 2 *****
 orbitals (Q,E):
 ---------------
 A :3...13           ( 1.00    -0.6488)  ( 1.00    -0.4801)  ( 1.00    -0.4218)  ( 1.00    -0.4135)
                     ( 1.00    -0.4019)  ( 1.00    -0.3666)  ( 1.00    -0.3447)  ( 1.00    -0.3393)
                     ( 1.00    -0.3135)  ( 1.00    -0.2058)  ( 0.00    -0.0611)
  
 Spin polar: 0 (Spin_A minus Spin_B electrons)

 CYCLE    8
  SDIIS (wt  1.000): -0.0004 -0.0001 -0.0002  0.0047  0.0473  0.1446  0.8041
  DIIS coefficients: -0.0004 -0.0001 -0.0002  0.0047  0.0473  0.1446  0.8041
 SCF Error: norm([F,P])=      0.002227685289, max([F,P])=      0.000373455560
 ***** SPIN 1 *****
 orbitals (Q,E):
 ---------------
 A :3...13           ( 1.00    -0.6489)  ( 1.00    -0.4802)  ( 1.00    -0.4218)  ( 1.00    -0.4135)
                     ( 1.00    -0.4019)  ( 1.00    -0.3667)  ( 1.00    -0.3446)  ( 1.00    -0.3394)
                     ( 1.00    -0.3135)  ( 1.00    -0.2057)  ( 0.00    -0.0611)
 ***** SPIN 2 *****
 orbitals (Q,E):
 ---------------
 A :3...13           ( 1.00    -0.6489)  ( 1.00    -0.4802)  ( 1.00    -0.4218)  ( 1.00    -0.4135)
                     ( 1.00    -0.4019)  ( 1.00    -0.3667)  ( 1.00    -0.3446)  ( 1.00    -0.3394)
                     ( 1.00    -0.3135)  ( 1.00    -0.2057)  ( 0.00    -0.0611)
  
 Spin polar: 0 (Spin_A minus Spin_B electrons)

 CYCLE    9
  SDIIS (wt  1.000): -0.0001  0.0000 -0.0004  0.0000  0.0062  0.0282  0.2311  0.7350
  DIIS coefficients: -0.0001  0.0000 -0.0004  0.0000  0.0062  0.0282  0.2311  0.7350
 SCF Error: norm([F,P])=      0.000183151297, max([F,P])=      0.000021149324
 ***** SPIN 1 *****
 orbitals (Q,E):
 ---------------
 A :3...13           ( 1.00    -0.6489)  ( 1.00    -0.4802)  ( 1.00    -0.4219)  ( 1.00    -0.4135)
                     ( 1.00    -0.4019)  ( 1.00    -0.3667)  ( 1.00    -0.3446)  ( 1.00    -0.3394)
                     ( 1.00    -0.3135)  ( 1.00    -0.2057)  ( 0.00    -0.0611)
 ***** SPIN 2 *****
 orbitals (Q,E):
 ---------------
 A :3...13           ( 1.00    -0.6489)  ( 1.00    -0.4802)  ( 1.00    -0.4219)  ( 1.00    -0.4135)
                     ( 1.00    -0.4019)  ( 1.00    -0.3667)  ( 1.00    -0.3446)  ( 1.00    -0.3394)
                     ( 1.00    -0.3135)  ( 1.00    -0.2057)  ( 0.00    -0.0611)
  
 Spin polar: 0 (Spin_A minus Spin_B electrons)

 CYCLE   10
  SDIIS (wt  1.000): -0.0000  0.0000 -0.0001 -0.0001  0.0005  0.0039  0.0481  0.2367  0.7109
  DIIS coefficients: -0.0000  0.0000 -0.0001 -0.0001  0.0005  0.0039  0.0481  0.2367  0.7109
 SCF Error: norm([F,P])=      0.000045631236, max([F,P])=      0.000006924153
 ***** SPIN 1 *****
 orbitals (Q,E):
 ---------------
 A :3...13           ( 1.00    -0.6489)  ( 1.00    -0.4802)  ( 1.00    -0.4219)  ( 1.00    -0.4135)
                     ( 1.00    -0.4019)  ( 1.00    -0.3667)  ( 1.00    -0.3446)  ( 1.00    -0.3394)
                     ( 1.00    -0.3135)  ( 1.00    -0.2057)  ( 0.00    -0.0611)
 ***** SPIN 2 *****
 orbitals (Q,E):
 ---------------
 A :3...13           ( 1.00    -0.6489)  ( 1.00    -0.4802)  ( 1.00    -0.4219)  ( 1.00    -0.4135)
                     ( 1.00    -0.4019)  ( 1.00    -0.3667)  ( 1.00    -0.3446)  ( 1.00    -0.3394)
                     ( 1.00    -0.3135)  ( 1.00    -0.2057)  ( 0.00    -0.0611)
  
 Spin polar: 0 (Spin_A minus Spin_B electrons)

 CYCLE   11
  SDIIS (wt  1.000): -0.0000  0.0000  0.0000 -0.0000 -0.0001 -0.0002  0.0043  0.0380  0.2187  0.7392
  DIIS coefficients: -0.0000  0.0000  0.0000 -0.0000 -0.0001 -0.0002  0.0043  0.0380  0.2187  0.7392
 SCF Error: norm([F,P])=      0.000008412890, max([F,P])=      0.000001042299
 ***** SPIN 1 *****
 orbitals (Q,E):
 ---------------
 A :3...13           ( 1.00    -0.6489)  ( 1.00    -0.4802)  ( 1.00    -0.4219)  ( 1.00    -0.4135)
                     ( 1.00    -0.4019)  ( 1.00    -0.3667)  ( 1.00    -0.3446)  ( 1.00    -0.3394)
                     ( 1.00    -0.3135)  ( 1.00    -0.2057)  ( 0.00    -0.0611)
 ***** SPIN 2 *****
 orbitals (Q,E):
 ---------------
 A :3...13           ( 1.00    -0.6489)  ( 1.00    -0.4802)  ( 1.00    -0.4219)  ( 1.00    -0.4135)
                     ( 1.00    -0.4019)  ( 1.00    -0.3667)  ( 1.00    -0.3446)  ( 1.00    -0.3394)
                     ( 1.00    -0.3135)  ( 1.00    -0.2057)  ( 0.00    -0.0611)
  
 Spin polar: 0 (Spin_A minus Spin_B electrons)

 CYCLE   12
  SDIIS (wt  1.000):  0.0000  0.0000  0.0000 -0.0000 -0.0001  0.0001  0.0028  0.0259  0.1184  0.8530
  DIIS coefficients:  0.0000  0.0000  0.0000 -0.0000 -0.0001  0.0001  0.0028  0.0259  0.1184  0.8530
 SCF Error: norm([F,P])=      0.000000396853, max([F,P])=      0.000000053541
 ***** SPIN 1 *****
 orbitals (Q,E):
 ---------------
 A :3...13           ( 1.00    -0.6489)  ( 1.00    -0.4802)  ( 1.00    -0.4219)  ( 1.00    -0.4135)
                     ( 1.00    -0.4019)  ( 1.00    -0.3667)  ( 1.00    -0.3446)  ( 1.00    -0.3394)
                     ( 1.00    -0.3135)  ( 1.00    -0.2057)  ( 0.00    -0.0611)
 ***** SPIN 2 *****
 orbitals (Q,E):
 ---------------
 A :3...13           ( 1.00    -0.6489)  ( 1.00    -0.4802)  ( 1.00    -0.4219)  ( 1.00    -0.4135)
                     ( 1.00    -0.4019)  ( 1.00    -0.3667)  ( 1.00    -0.3446)  ( 1.00    -0.3394)
                     ( 1.00    -0.3135)  ( 1.00    -0.2057)  ( 0.00    -0.0611)
  
 Spin polar: 0 (Spin_A minus Spin_B electrons)

 CYCLE   13
  SDIIS (wt  1.000):  0.0000  0.0000 -0.0000 -0.0000 -0.0000  0.0002  0.0029  0.0151  0.1879  0.7939
  DIIS coefficients:  0.0000  0.0000 -0.0000 -0.0000 -0.0000  0.0002  0.0029  0.0151  0.1879  0.7939
 SCF Error: norm([F,P])=      0.000000127403, max([F,P])=      0.000000020716
 ***** SPIN 1 *****
 orbitals (Q,E):
 ---------------
 A :3...13           ( 1.00    -0.6489)  ( 1.00    -0.4802)  ( 1.00    -0.4219)  ( 1.00    -0.4135)
                     ( 1.00    -0.4019)  ( 1.00    -0.3667)  ( 1.00    -0.3446)  ( 1.00    -0.3394)
                     ( 1.00    -0.3135)  ( 1.00    -0.2057)  ( 0.00    -0.0611)
 ***** SPIN 2 *****
 orbitals (Q,E):
 ---------------
 A :3...13           ( 1.00    -0.6489)  ( 1.00    -0.4802)  ( 1.00    -0.4219)  ( 1.00    -0.4135)
                     ( 1.00    -0.4019)  ( 1.00    -0.3667)  ( 1.00    -0.3446)  ( 1.00    -0.3394)
                     ( 1.00    -0.3135)  ( 1.00    -0.2057)  ( 0.00    -0.0611)
  
 Spin polar: 0 (Spin_A minus Spin_B electrons)

 CYCLE   14
  SDIIS (wt  1.000):  0.0000  0.0000  0.0000  0.0000  0.0001  0.0007  0.0120  0.0781  0.9090
  DIIS coefficients:  0.0000  0.0000  0.0000  0.0000  0.0001  0.0007  0.0120  0.0781  0.9090
 SCF Error: norm([F,P])=      0.000000008683, max([F,P])=      0.000000001247
 ***** SPIN 1 *****
 orbitals (Q,E):
 ---------------
 A :3...13           ( 1.00    -0.6489)  ( 1.00    -0.4802)  ( 1.00    -0.4219)  ( 1.00    -0.4135)
                     ( 1.00    -0.4019)  ( 1.00    -0.3667)  ( 1.00    -0.3446)  ( 1.00    -0.3394)
                     ( 1.00    -0.3135)  ( 1.00    -0.2057)  ( 0.00    -0.0611)
 ***** SPIN 2 *****
 orbitals (Q,E):
 ---------------
 A :3...13           ( 1.00    -0.6489)  ( 1.00    -0.4802)  ( 1.00    -0.4219)  ( 1.00    -0.4135)
                     ( 1.00    -0.4019)  ( 1.00    -0.3667)  ( 1.00    -0.3446)  ( 1.00    -0.3394)
                     ( 1.00    -0.3135)  ( 1.00    -0.2057)  ( 0.00    -0.0611)
  
 Spin polar: 0 (Spin_A minus Spin_B electrons)

 SCF CONVERGED

 CYCLE   15
 *** Setting up for NEW gradients in Focky
 *** Using FIT density in Focky
 ***** SPIN 1 *****
 orbitals (Q,E):
 ---------------
 A :3...22           ( 1.00    -0.6489)  ( 1.00    -0.4802)  ( 1.00    -0.4219)  ( 1.00    -0.4135)
                     ( 1.00    -0.4019)  ( 1.00    -0.3667)  ( 1.00    -0.3446)  ( 1.00    -0.3394)
                     ( 1.00    -0.3135)  ( 1.00    -0.2057)  ( 0.00    -0.0611)  ( 0.00    -0.0136)
                     ( 0.00     0.0270)  ( 0.00     0.0392)  ( 0.00     0.0467)  ( 0.00     0.0737)
                     ( 0.00     0.0821)  ( 0.00     0.0852)  ( 0.00     0.1160)  ( 0.00     0.1547)
 ***** SPIN 2 *****
 orbitals (Q,E):
 ---------------
 A :3...22           ( 1.00    -0.6489)  ( 1.00    -0.4802)  ( 1.00    -0.4219)  ( 1.00    -0.4135)
                     ( 1.00    -0.4019)  ( 1.00    -0.3667)  ( 1.00    -0.3446)  ( 1.00    -0.3394)
                     ( 1.00    -0.3135)  ( 1.00    -0.2057)  ( 0.00    -0.0611)  ( 0.00    -0.0136)
                     ( 0.00     0.0270)  ( 0.00     0.0392)  ( 0.00     0.0467)  ( 0.00     0.0737)
                     ( 0.00     0.0821)  ( 0.00     0.0852)  ( 0.00     0.1160)  ( 0.00     0.1547)
  
 Spin polar: 0 (Spin_A minus Spin_B electrons)


 Fit test: (difference of exact and fit density, squared integrated, result summed over spins)
         SCF:                                          0.00001066781470

 Gross Charges per Atom (Z minus electrons)
 ==========================================
             0.6162    0.3600    0.3600   -0.5521   -0.1345   -0.1232   -0.1345   -0.1345   -0.1345   -0.1232
 Net Total:  0.00000000


 =================================================================
 M U L T I P O L E   D E R I V E D   C H A R G E   A N A L Y S I S
 =================================================================

 See: M. Swart, P.Th. van Duijnen, J.G. Snijders, J.Comput.Chem., (2001), p. 79-88.

 ----------------------------------------------------- 
 MDC atomic charges (includes spinA + spinB electrons)
 ----------------------------------------------------- 

        Atom    Level:     MDC-m        MDC-d        MDC-q
 ---------------------------------------------------------
     1     C            0.244108     0.306521     0.467782
     2     C            0.206138     0.171807     0.325972
     3     C            0.206138     0.171807     0.325972
     4     O           -0.369110    -0.474159    -0.572704
     5     H           -0.051040    -0.039016    -0.108307
     6     H           -0.041557    -0.009955    -0.056897
     7     H           -0.051040    -0.039016    -0.108307
     8     H           -0.051040    -0.039016    -0.108307
     9     H           -0.051040    -0.039016    -0.108307
    10     H           -0.041557    -0.009955    -0.056897

 -------------------------------- 
 MDC spin density (spinA - spinB)
 -------------------------------- 

        Atom    Level:     MDC-m        MDC-d        MDC-q
 ---------------------------------------------------------
     1     C            0.000000     0.000000     0.000000
     2     C            0.000000     0.000000    -0.000000
     3     C           -0.000000    -0.000000     0.000000
     4     O           -0.000000    -0.000000    -0.000000
     5     H            0.000000    -0.000000    -0.000000
     6     H           -0.000000    -0.000000    -0.000000
     7     H           -0.000000    -0.000000    -0.000000
     8     H           -0.000000     0.000000     0.000000
     9     H           -0.000000     0.000000     0.000000
    10     H           -0.000000    -0.000000     0.000000


 ==========
 S**2 value  ***  see also R. Bulo et al., J.Am.Chem.Soc., 124 (2002) 13903-13910, note (29)  ***
 ==========
  
                                       exact      expectation value

 Total S2 (S squared)                  0.00000             0.00000
 *** Using NEW gradient routines ***


 Geometry CYCLE 1
 ==============

 Energy gradients wrt nuclear displacements
 ==========================================

     Atom      Cartesian (a.u./angstrom)
                 X         Y         Z
 ----------------------------------------
     1 C     0.000000  0.000000  0.034896
     2 C     0.021951  0.000000 -0.013407
     3 C    -0.021951  0.000000 -0.013406
     4 O    -0.000000 -0.000000  0.010526
     5 H    -0.000787  0.013150 -0.000237
     6 H     0.017400  0.000000 -0.008830
     7 H    -0.000787 -0.013150 -0.000237
     8 H     0.000787 -0.013150 -0.000237
     9 H     0.000787  0.013150 -0.000237
    10 H    -0.017400 -0.000000 -0.008830
 ----------------------------------------
 
----------------------------------------------------------------------
Geometry Convergence after Step   1       (Hartree/Angstrom,Angstrom)
----------------------------------------------------------------------
current energy                               -2.05327851 Hartree
energy change                      -2.05327851     0.00100000    F
constrained gradient max            0.03489597     0.00100000    F
constrained gradient rms            0.01170123     0.00066667    F
gradient max                        0.03489597
gradient rms                        0.01170123
cart. step max                      0.04176346     0.01000000    F
cart. step rms                      0.02116732     0.00666667    F
 


 Coordinates (Cartesian)
 =======================

     Atom                    bohr                                 angstrom                 Geometric Variables
                   X           Y           Z              X           Y           Z       (0:frozen, *:LT par.)
 --------------------------------------------------------------------------------------------------------------
     1 C      -0.000000   -0.000001   -1.159950      -0.000000   -0.000000   -0.613819      1       2       3
     2 C      -2.428530    0.000002    0.335421      -1.285123    0.000001    0.177497      4       5       6
     3 C       2.428535    0.000003    0.335411       1.285125    0.000002    0.177492      7       8       9
     4 O      -0.000005   -0.000005   -3.480005      -0.000003   -0.000003   -1.841539     10      11      12
     5 H       2.526434    1.678678    1.565669       1.336931    0.888318    0.828516     13      14      15
     6 H       4.051915    0.000007   -0.955153       2.144181    0.000004   -0.505445     16      17      18
     7 H       2.526442   -1.678672    1.565667       1.336935   -0.888315    0.828515     19      20      21
     8 H      -2.526425   -1.678668    1.565684      -1.336926   -0.888313    0.828524     22      23      24
     9 H      -2.526430    1.678683    1.565670      -1.336929    0.888321    0.828517     25      26      27
    10 H      -4.051914   -0.000005   -0.955137      -2.144181   -0.000003   -0.505437     28      29      30
 --------------------------------------------------------------------------------------------------------------

 Number of elements of the density matrix on this node (used, total):      1275     17766


 ===========================================
 Numerical Integration : Fuzzy Cells (Becke)
 ===========================================
  
 Becke grid quality: GOOD           
  
 Lebedev angular grid order:             min:  11 max:  31
 Nr. of radial points:                   min:  54 max:  61

 Total nr. of points:     122550
 Nr. of blocks:              958
 Block length:               128
 Nr. of dummy points:         74


 Test of Precision of the Numerical Integration Grid
 ===================================================

 Integral of the Total Core Density:                   8.00000151332712
 Relative Error:                                       1.892E-07


 ========================
 Density Fitting (zlmFit)
 ========================
  
 ZlmFit Fit Quality: GOOD           
  
 Max L-expansion:                        min:   8 max:   9
 Nr. of radial interpolation points:     min:  78 max:  96


 =====
 S C F  ***  ScaSCF  ***
 =====
  
 Initial density matrix is taken from previous geometry

 CYCLE    1
 SCF Error: norm([F,P])=      0.044176578825, max([F,P])=      0.002983204806
 ***** SPIN 1 *****
 orbitals (Q,E):
 ---------------
 A :3...22           ( 1.00    -0.6462)  ( 1.00    -0.4805)  ( 1.00    -0.4176)  ( 1.00    -0.4119)
                     ( 1.00    -0.4021)  ( 1.00    -0.3620)  ( 1.00    -0.3476)  ( 1.00    -0.3362)
                     ( 1.00    -0.3120)  ( 1.00    -0.2058)  ( 0.00    -0.0627)  ( 0.00    -0.0112)
                     ( 0.00     0.0298)  ( 0.00     0.0418)  ( 0.00     0.0507)  ( 0.00     0.0769)
                     ( 0.00     0.0861)  ( 0.00     0.0865)  ( 0.00     0.1185)  ( 0.00     0.1564)
 ***** SPIN 2 *****
 orbitals (Q,E):
 ---------------
 A :3...22           ( 1.00    -0.6462)  ( 1.00    -0.4805)  ( 1.00    -0.4176)  ( 1.00    -0.4119)
                     ( 1.00    -0.4021)  ( 1.00    -0.3620)  ( 1.00    -0.3476)  ( 1.00    -0.3362)
                     ( 1.00    -0.3120)  ( 1.00    -0.2058)  ( 0.00    -0.0627)  ( 0.00    -0.0112)
                     ( 0.00     0.0298)  ( 0.00     0.0418)  ( 0.00     0.0507)  ( 0.00     0.0769)
                     ( 0.00     0.0861)  ( 0.00     0.0865)  ( 0.00     0.1185)  ( 0.00     0.1564)
  
 Spin polar: 0 (Spin_A minus Spin_B electrons)

 CYCLE    2
   MIX coefficients:  0.8000  0.2000
 SCF Error: norm([F,P])=      0.030798409872, max([F,P])=      0.004912989452
 ***** SPIN 1 *****
 orbitals (Q,E):
 ---------------
 A :3...13           ( 1.00    -0.6463)  ( 1.00    -0.4809)  ( 1.00    -0.4177)  ( 1.00    -0.4122)
                     ( 1.00    -0.4028)  ( 1.00    -0.3623)  ( 1.00    -0.3485)  ( 1.00    -0.3362)
                     ( 1.00    -0.3131)  ( 1.00    -0.2073)  ( 0.00    -0.0630)
 ***** SPIN 2 *****
 orbitals (Q,E):
 ---------------
 A :3...13           ( 1.00    -0.6463)  ( 1.00    -0.4809)  ( 1.00    -0.4177)  ( 1.00    -0.4122)
                     ( 1.00    -0.4028)  ( 1.00    -0.3623)  ( 1.00    -0.3485)  ( 1.00    -0.3362)
                     ( 1.00    -0.3131)  ( 1.00    -0.2073)  ( 0.00    -0.0630)
  
 Spin polar: 0 (Spin_A minus Spin_B electrons)

 CYCLE    3
  SDIIS (wt  0.000): -0.2825  1.2825
 A-DIIS (wt  1.000):  0.0000  1.0000
  DIIS coefficients:  0.0000  1.0000
 SCF Error: norm([F,P])=      0.009894478222, max([F,P])=      0.000953073938
 ***** SPIN 1 *****
 orbitals (Q,E):
 ---------------
 A :3...13           ( 1.00    -0.6481)  ( 1.00    -0.4828)  ( 1.00    -0.4192)  ( 1.00    -0.4141)
                     ( 1.00    -0.4046)  ( 1.00    -0.3646)  ( 1.00    -0.3507)  ( 1.00    -0.3376)
                     ( 1.00    -0.3148)  ( 1.00    -0.2094)  ( 0.00    -0.0638)
 ***** SPIN 2 *****
 orbitals (Q,E):
 ---------------
 A :3...13           ( 1.00    -0.6481)  ( 1.00    -0.4828)  ( 1.00    -0.4192)  ( 1.00    -0.4141)
                     ( 1.00    -0.4046)  ( 1.00    -0.3646)  ( 1.00    -0.3507)  ( 1.00    -0.3376)
                     ( 1.00    -0.3148)  ( 1.00    -0.2094)  ( 0.00    -0.0638)
  
 Spin polar: 0 (Spin_A minus Spin_B electrons)

 CYCLE    4
  SDIIS (wt  0.000):  0.3392  0.0228  0.6380
 A-DIIS (wt  1.000):  0.0000  0.6715  0.3285
  DIIS coefficients:  0.0000  0.6715  0.3285
 SCF Error: norm([F,P])=      0.016755010560, max([F,P])=      0.002633747778
 ***** SPIN 1 *****
 orbitals (Q,E):
 ---------------
 A :3...13           ( 1.00    -0.6483)  ( 1.00    -0.4829)  ( 1.00    -0.4194)  ( 1.00    -0.4144)
                     ( 1.00    -0.4044)  ( 1.00    -0.3645)  ( 1.00    -0.3504)  ( 1.00    -0.3379)
                     ( 1.00    -0.3144)  ( 1.00    -0.2087)  ( 0.00    -0.0642)
 ***** SPIN 2 *****
 orbitals (Q,E):
 ---------------
 A :3...13           ( 1.00    -0.6483)  ( 1.00    -0.4829)  ( 1.00    -0.4194)  ( 1.00    -0.4144)
                     ( 1.00    -0.4044)  ( 1.00    -0.3645)  ( 1.00    -0.3504)  ( 1.00    -0.3379)
                     ( 1.00    -0.3144)  ( 1.00    -0.2087)  ( 0.00    -0.0642)
  
 Spin polar: 0 (Spin_A minus Spin_B electrons)

 CYCLE    5
  SDIIS (wt  1.000): -0.4772  0.7779 -0.3054  1.0046
  DIIS coefficients: -0.4772  0.7779 -0.3054  1.0046
 SCF Error: norm([F,P])=      0.005384471760, max([F,P])=      0.000807650708
 ***** SPIN 1 *****
 orbitals (Q,E):
 ---------------
 A :3...13           ( 1.00    -0.6481)  ( 1.00    -0.4828)  ( 1.00    -0.4193)  ( 1.00    -0.4142)
                     ( 1.00    -0.4045)  ( 1.00    -0.3642)  ( 1.00    -0.3505)  ( 1.00    -0.3378)
                     ( 1.00    -0.3147)  ( 1.00    -0.2091)  ( 0.00    -0.0643)
 ***** SPIN 2 *****
 orbitals (Q,E):
 ---------------
 A :3...13           ( 1.00    -0.6481)  ( 1.00    -0.4828)  ( 1.00    -0.4193)  ( 1.00    -0.4142)
                     ( 1.00    -0.4045)  ( 1.00    -0.3642)  ( 1.00    -0.3505)  ( 1.00    -0.3378)
                     ( 1.00    -0.3147)  ( 1.00    -0.2091)  ( 0.00    -0.0643)
  
 Spin polar: 0 (Spin_A minus Spin_B electrons)

 CYCLE    6
  SDIIS (wt  1.000): -0.1724  0.2631 -0.1277  0.3574  0.6796
  DIIS coefficients: -0.1724  0.2631 -0.1277  0.3574  0.6796
 SCF Error: norm([F,P])=      0.000314525555, max([F,P])=      0.000045441396
 ***** SPIN 1 *****
 orbitals (Q,E):
 ---------------
 A :3...13           ( 1.00    -0.6481)  ( 1.00    -0.4828)  ( 1.00    -0.4193)  ( 1.00    -0.4142)
                     ( 1.00    -0.4045)  ( 1.00    -0.3643)  ( 1.00    -0.3505)  ( 1.00    -0.3378)
                     ( 1.00    -0.3147)  ( 1.00    -0.2091)  ( 0.00    -0.0643)
 ***** SPIN 2 *****
 orbitals (Q,E):
 ---------------
 A :3...13           ( 1.00    -0.6481)  ( 1.00    -0.4828)  ( 1.00    -0.4193)  ( 1.00    -0.4142)
                     ( 1.00    -0.4045)  ( 1.00    -0.3643)  ( 1.00    -0.3505)  ( 1.00    -0.3378)
                     ( 1.00    -0.3147)  ( 1.00    -0.2091)  ( 0.00    -0.0643)
  
 Spin polar: 0 (Spin_A minus Spin_B electrons)

 CYCLE    7
  SDIIS (wt  1.000): -0.0459  0.0679 -0.0359  0.0928  0.2327  0.6884
  DIIS coefficients: -0.0459  0.0679 -0.0359  0.0928  0.2327  0.6884
 SCF Error: norm([F,P])=      0.000041610489, max([F,P])=      0.000003149421
 ***** SPIN 1 *****
 orbitals (Q,E):
 ---------------
 A :3...13           ( 1.00    -0.6481)  ( 1.00    -0.4828)  ( 1.00    -0.4193)  ( 1.00    -0.4142)
                     ( 1.00    -0.4045)  ( 1.00    -0.3643)  ( 1.00    -0.3505)  ( 1.00    -0.3378)
                     ( 1.00    -0.3147)  ( 1.00    -0.2091)  ( 0.00    -0.0643)
 ***** SPIN 2 *****
 orbitals (Q,E):
 ---------------
 A :3...13           ( 1.00    -0.6481)  ( 1.00    -0.4828)  ( 1.00    -0.4193)  ( 1.00    -0.4142)
                     ( 1.00    -0.4045)  ( 1.00    -0.3643)  ( 1.00    -0.3505)  ( 1.00    -0.3378)
                     ( 1.00    -0.3147)  ( 1.00    -0.2091)  ( 0.00    -0.0643)
  
 Spin polar: 0 (Spin_A minus Spin_B electrons)

 CYCLE    8
  SDIIS (wt  1.000): -0.0062  0.0086 -0.0052  0.0113  0.0296  0.1576  0.8043
  DIIS coefficients: -0.0062  0.0086 -0.0052  0.0113  0.0296  0.1576  0.8043
 SCF Error: norm([F,P])=      0.000006077182, max([F,P])=      0.000000592454
 ***** SPIN 1 *****
 orbitals (Q,E):
 ---------------
 A :3...13           ( 1.00    -0.6481)  ( 1.00    -0.4828)  ( 1.00    -0.4193)  ( 1.00    -0.4142)
                     ( 1.00    -0.4045)  ( 1.00    -0.3643)  ( 1.00    -0.3505)  ( 1.00    -0.3378)
                     ( 1.00    -0.3147)  ( 1.00    -0.2091)  ( 0.00    -0.0643)
 ***** SPIN 2 *****
 orbitals (Q,E):
 ---------------
 A :3...13           ( 1.00    -0.6481)  ( 1.00    -0.4828)  ( 1.00    -0.4193)  ( 1.00    -0.4142)
                     ( 1.00    -0.4045)  ( 1.00    -0.3643)  ( 1.00    -0.3505)  ( 1.00    -0.3378)
                     ( 1.00    -0.3147)  ( 1.00    -0.2091)  ( 0.00    -0.0643)
  
 Spin polar: 0 (Spin_A minus Spin_B electrons)

 CYCLE    9
  SDIIS (wt  1.000): -0.0016  0.0022 -0.0014  0.0029  0.0070  0.0516  0.3592  0.5801
  DIIS coefficients: -0.0016  0.0022 -0.0014  0.0029  0.0070  0.0516  0.3592  0.5801
 SCF Error: norm([F,P])=      0.000002359494, max([F,P])=      0.000000272655
 ***** SPIN 1 *****
 orbitals (Q,E):
 ---------------
 A :3...13           ( 1.00    -0.6481)  ( 1.00    -0.4828)  ( 1.00    -0.4193)  ( 1.00    -0.4142)
                     ( 1.00    -0.4045)  ( 1.00    -0.3643)  ( 1.00    -0.3505)  ( 1.00    -0.3378)
                     ( 1.00    -0.3147)  ( 1.00    -0.2091)  ( 0.00    -0.0643)
 ***** SPIN 2 *****
 orbitals (Q,E):
 ---------------
 A :3...13           ( 1.00    -0.6481)  ( 1.00    -0.4828)  ( 1.00    -0.4193)  ( 1.00    -0.4142)
                     ( 1.00    -0.4045)  ( 1.00    -0.3643)  ( 1.00    -0.3505)  ( 1.00    -0.3378)
                     ( 1.00    -0.3147)  ( 1.00    -0.2091)  ( 0.00    -0.0643)
  
 Spin polar: 0 (Spin_A minus Spin_B electrons)

 CYCLE   10
  SDIIS (wt  1.000): -0.0001  0.0001 -0.0001  0.0001  0.0002  0.0090  0.0948  0.2982  0.5978
  DIIS coefficients: -0.0001  0.0001 -0.0001  0.0001  0.0002  0.0090  0.0948  0.2982  0.5978
 SCF Error: norm([F,P])=      0.000000810549, max([F,P])=      0.000000102442
 ***** SPIN 1 *****
 orbitals (Q,E):
 ---------------
 A :3...13           ( 1.00    -0.6481)  ( 1.00    -0.4828)  ( 1.00    -0.4193)  ( 1.00    -0.4142)
                     ( 1.00    -0.4045)  ( 1.00    -0.3643)  ( 1.00    -0.3505)  ( 1.00    -0.3378)
                     ( 1.00    -0.3147)  ( 1.00    -0.2091)  ( 0.00    -0.0643)
 ***** SPIN 2 *****
 orbitals (Q,E):
 ---------------
 A :3...13           ( 1.00    -0.6481)  ( 1.00    -0.4828)  ( 1.00    -0.4193)  ( 1.00    -0.4142)
                     ( 1.00    -0.4045)  ( 1.00    -0.3643)  ( 1.00    -0.3505)  ( 1.00    -0.3378)
                     ( 1.00    -0.3147)  ( 1.00    -0.2091)  ( 0.00    -0.0643)
  
 Spin polar: 0 (Spin_A minus Spin_B electrons)

 CYCLE   11
  SDIIS (wt  1.000):  0.0000 -0.0000  0.0000 -0.0000 -0.0001  0.0005  0.0105  0.0394  0.1152  0.8345
  DIIS coefficients:  0.0000 -0.0000  0.0000 -0.0000 -0.0001  0.0005  0.0105  0.0394  0.1152  0.8345
 SCF Error: norm([F,P])=      0.000000049577, max([F,P])=      0.000000007787
 ***** SPIN 1 *****
 orbitals (Q,E):
 ---------------
 A :3...13           ( 1.00    -0.6481)  ( 1.00    -0.4828)  ( 1.00    -0.4193)  ( 1.00    -0.4142)
                     ( 1.00    -0.4045)  ( 1.00    -0.3643)  ( 1.00    -0.3505)  ( 1.00    -0.3378)
                     ( 1.00    -0.3147)  ( 1.00    -0.2091)  ( 0.00    -0.0643)
 ***** SPIN 2 *****
 orbitals (Q,E):
 ---------------
 A :3...13           ( 1.00    -0.6481)  ( 1.00    -0.4828)  ( 1.00    -0.4193)  ( 1.00    -0.4142)
                     ( 1.00    -0.4045)  ( 1.00    -0.3643)  ( 1.00    -0.3505)  ( 1.00    -0.3378)
                     ( 1.00    -0.3147)  ( 1.00    -0.2091)  ( 0.00    -0.0643)
  
 Spin polar: 0 (Spin_A minus Spin_B electrons)

 SCF CONVERGED

 CYCLE   12
 *** Setting up for NEW gradients in Focky
 *** Using FIT density in Focky
 ***** SPIN 1 *****
 orbitals (Q,E):
 ---------------
 A :3...22           ( 1.00    -0.6481)  ( 1.00    -0.4828)  ( 1.00    -0.4193)  ( 1.00    -0.4142)
                     ( 1.00    -0.4045)  ( 1.00    -0.3643)  ( 1.00    -0.3505)  ( 1.00    -0.3378)
                     ( 1.00    -0.3147)  ( 1.00    -0.2091)  ( 0.00    -0.0643)  ( 0.00    -0.0132)
                     ( 0.00     0.0278)  ( 0.00     0.0400)  ( 0.00     0.0492)  ( 0.00     0.0750)
                     ( 0.00     0.0842)  ( 0.00     0.0845)  ( 0.00     0.1162)  ( 0.00     0.1548)
 ***** SPIN 2 *****
 orbitals (Q,E):
 ---------------
 A :3...22           ( 1.00    -0.6481)  ( 1.00    -0.4828)  ( 1.00    -0.4193)  ( 1.00    -0.4142)
                     ( 1.00    -0.4045)  ( 1.00    -0.3643)  ( 1.00    -0.3505)  ( 1.00    -0.3378)
                     ( 1.00    -0.3147)  ( 1.00    -0.2091)  ( 0.00    -0.0643)  ( 0.00    -0.0132)
                     ( 0.00     0.0278)  ( 0.00     0.0400)  ( 0.00     0.0492)  ( 0.00     0.0750)
                     ( 0.00     0.0842)  ( 0.00     0.0845)  ( 0.00     0.1162)  ( 0.00     0.1548)
  
 Spin polar: 0 (Spin_A minus Spin_B electrons)


 Fit test: (difference of exact and fit density, squared integrated, result summed over spins)
         SCF:                                          0.00001080846995

 Gross Charges per Atom (Z minus electrons)
 ==========================================
             0.5961    0.3823    0.3823   -0.5477   -0.1344   -0.1377   -0.1344   -0.1344   -0.1344   -0.1377
 Net Total:  0.00000000


 =================================================================
 M U L T I P O L E   D E R I V E D   C H A R G E   A N A L Y S I S
 =================================================================

 See: M. Swart, P.Th. van Duijnen, J.G. Snijders, J.Comput.Chem., (2001), p. 79-88.

 ----------------------------------------------------- 
 MDC atomic charges (includes spinA + spinB electrons)
 ----------------------------------------------------- 

        Atom    Level:     MDC-m        MDC-d        MDC-q
 ---------------------------------------------------------
     1     C            0.247867     0.301173     0.404018
     2     C            0.206616     0.171008     0.312481
     3     C            0.206616     0.171008     0.312481
     4     O           -0.365214    -0.466210    -0.532011
     5     H           -0.051243    -0.035547    -0.094913
     6     H           -0.045456    -0.017397    -0.058659
     7     H           -0.051243    -0.035546    -0.094912
     8     H           -0.051243    -0.035547    -0.094913
     9     H           -0.051243    -0.035546    -0.094913
    10     H           -0.045456    -0.017397    -0.058659

 -------------------------------- 
 MDC spin density (spinA - spinB)
 -------------------------------- 

        Atom    Level:     MDC-m        MDC-d        MDC-q
 ---------------------------------------------------------
     1     C           -0.000000    -0.000000     0.000000
     2     C            0.000000     0.000000    -0.000000
     3     C            0.000000    -0.000000     0.000000
     4     O           -0.000000    -0.000000    -0.000000
     5     H           -0.000000     0.000000    -0.000000
     6     H            0.000000     0.000000     0.000000
     7     H            0.000000    -0.000000    -0.000000
     8     H           -0.000000    -0.000000     0.000000
     9     H           -0.000000    -0.000000     0.000000
    10     H           -0.000000    -0.000000     0.000000


 ==========
 S**2 value  ***  see also R. Bulo et al., J.Am.Chem.Soc., 124 (2002) 13903-13910, note (29)  ***
 ==========
  
                                       exact      expectation value

 Total S2 (S squared)                  0.00000             0.00000
 *** Using NEW gradient routines ***


 Geometry CYCLE 2
 ==============

 Energy gradients wrt nuclear displacements
 ==========================================

     Atom      Cartesian (a.u./angstrom)
                 X         Y         Z
 ----------------------------------------
     1 C    -0.000000 -0.000000  0.023367
     2 C     0.009285  0.000000 -0.000307
     3 C    -0.009285  0.000000 -0.000306
     4 O    -0.000000  0.000000 -0.018800
     5 H     0.001039  0.003209 -0.000187
     6 H     0.002337 -0.000000 -0.001604
     7 H     0.001039 -0.003209 -0.000186
     8 H    -0.001039 -0.003209 -0.000186
     9 H    -0.001039  0.003209 -0.000186
    10 H    -0.002337 -0.000000 -0.001604
 ----------------------------------------

 dE(predicted):    -0.15539E-02, dE(actual):    -0.17086E-02, Trust radius:    0.632456, all in a.u.
 
----------------------------------------------------------------------
Geometry Convergence after Step   2       (Hartree/Angstrom,Angstrom)
----------------------------------------------------------------------
current energy                               -2.05498706 Hartree
energy change                      -0.00170855     0.00100000    F
constrained gradient max            0.02336674     0.00100000    F
constrained gradient rms            0.00614759     0.00066667    F
gradient max                        0.02336674
gradient rms                        0.00614759
cart. step max                      0.00775055     0.01000000    T
cart. step rms                      0.00451413     0.00666667    T
 


 Coordinates (Cartesian)
 =======================

     Atom                    bohr                                 angstrom                 Geometric Variables
                   X           Y           Z              X           Y           Z       (0:frozen, *:LT par.)
 --------------------------------------------------------------------------------------------------------------
     1 C      -0.000000   -0.000000   -1.174596      -0.000000   -0.000000   -0.621570      1       2       3
     2 C      -2.431393    0.000003    0.335469      -1.286638    0.000001    0.177522      4       5       6
     3 C       2.431398    0.000003    0.335458       1.286640    0.000002    0.177517      7       8       9
     4 O      -0.000005   -0.000005   -3.473278      -0.000003   -0.000003   -1.837980     10      11      12
     5 H       2.516308    1.665536    1.575271       1.331573    0.881364    0.833597     13      14      15
     6 H       4.056550    0.000014   -0.941090       2.146634    0.000007   -0.498004     16      17      18
     7 H       2.516323   -1.665539    1.575258       1.331581   -0.881365    0.833591     19      20      21
     8 H      -2.516300   -1.665528    1.575285      -1.331569   -0.881359    0.833605     22      23      24
     9 H      -2.516311    1.665551    1.575260      -1.331575    0.881371    0.833592     25      26      27
    10 H      -4.056549   -0.000011   -0.941075      -2.146633   -0.000006   -0.497995     28      29      30
 --------------------------------------------------------------------------------------------------------------

 Number of elements of the density matrix on this node (used, total):      1275     17766


 ===========================================
 Numerical Integration : Fuzzy Cells (Becke)
 ===========================================
  
 Becke grid quality: GOOD           
  
 Lebedev angular grid order:             min:  11 max:  31
 Nr. of radial points:                   min:  54 max:  61

 Total nr. of points:     122544
 Nr. of blocks:              958
 Block length:               128
 Nr. of dummy points:         80


 Test of Precision of the Numerical Integration Grid
 ===================================================

 Integral of the Total Core Density:                   7.99999999426431
 Relative Error:                                      -7.170E-10


 ========================
 Density Fitting (zlmFit)
 ========================
  
 ZlmFit Fit Quality: GOOD           
  
 Max L-expansion:                        min:   8 max:   9
 Nr. of radial interpolation points:     min:  78 max:  96


 =====
 S C F  ***  ScaSCF  ***
 =====
  
 Initial density matrix is taken from previous geometry

 CYCLE    1
 SCF Error: norm([F,P])=      0.022995522864, max([F,P])=      0.003085980115
 ***** SPIN 1 *****
 orbitals (Q,E):
 ---------------
 A :3...22           ( 1.00    -0.6452)  ( 1.00    -0.4795)  ( 1.00    -0.4159)  ( 1.00    -0.4122)
                     ( 1.00    -0.4023)  ( 1.00    -0.3606)  ( 1.00    -0.3497)  ( 1.00    -0.3362)
                     ( 1.00    -0.3135)  ( 1.00    -0.2055)  ( 0.00    -0.0581)  ( 0.00    -0.0109)
                     ( 0.00     0.0301)  ( 0.00     0.0424)  ( 0.00     0.0517)  ( 0.00     0.0773)
                     ( 0.00     0.0863)  ( 0.00     0.0875)  ( 0.00     0.1199)  ( 0.00     0.1565)
 ***** SPIN 2 *****
 orbitals (Q,E):
 ---------------
 A :3...22           ( 1.00    -0.6452)  ( 1.00    -0.4795)  ( 1.00    -0.4159)  ( 1.00    -0.4122)
                     ( 1.00    -0.4023)  ( 1.00    -0.3606)  ( 1.00    -0.3497)  ( 1.00    -0.3362)
                     ( 1.00    -0.3135)  ( 1.00    -0.2055)  ( 0.00    -0.0581)  ( 0.00    -0.0109)
                     ( 0.00     0.0301)  ( 0.00     0.0424)  ( 0.00     0.0517)  ( 0.00     0.0773)
                     ( 0.00     0.0863)  ( 0.00     0.0875)  ( 0.00     0.1199)  ( 0.00     0.1565)
  
 Spin polar: 0 (Spin_A minus Spin_B electrons)

 CYCLE    2
   MIX coefficients:  0.8000  0.2000
 SCF Error: norm([F,P])=      0.009653659679, max([F,P])=      0.001188143899
 ***** SPIN 1 *****
 orbitals (Q,E):
 ---------------
 A :3...13           ( 1.00    -0.6458)  ( 1.00    -0.4803)  ( 1.00    -0.4166)  ( 1.00    -0.4131)
                     ( 1.00    -0.4031)  ( 1.00    -0.3610)  ( 1.00    -0.3506)  ( 1.00    -0.3368)
                     ( 1.00    -0.3148)  ( 1.00    -0.2068)  ( 0.00    -0.0592)
 ***** SPIN 2 *****
 orbitals (Q,E):
 ---------------
 A :3...13           ( 1.00    -0.6458)  ( 1.00    -0.4803)  ( 1.00    -0.4166)  ( 1.00    -0.4131)
                     ( 1.00    -0.4031)  ( 1.00    -0.3610)  ( 1.00    -0.3506)  ( 1.00    -0.3368)
                     ( 1.00    -0.3148)  ( 1.00    -0.2068)  ( 0.00    -0.0592)
  
 Spin polar: 0 (Spin_A minus Spin_B electrons)

 CYCLE    3
  SDIIS (wt  0.000): -0.5808  1.5808
 A-DIIS (wt  1.000):  0.0000  1.0000
  DIIS coefficients:  0.0000  1.0000
 SCF Error: norm([F,P])=      0.005187631161, max([F,P])=      0.000763587032
 ***** SPIN 1 *****
 orbitals (Q,E):
 ---------------
 A :3...13           ( 1.00    -0.6480)  ( 1.00    -0.4829)  ( 1.00    -0.4191)  ( 1.00    -0.4161)
                     ( 1.00    -0.4056)  ( 1.00    -0.3628)  ( 1.00    -0.3535)  ( 1.00    -0.3390)
                     ( 1.00    -0.3184)  ( 1.00    -0.2105)  ( 0.00    -0.0626)
 ***** SPIN 2 *****
 orbitals (Q,E):
 ---------------
 A :3...13           ( 1.00    -0.6480)  ( 1.00    -0.4829)  ( 1.00    -0.4191)  ( 1.00    -0.4161)
                     ( 1.00    -0.4056)  ( 1.00    -0.3628)  ( 1.00    -0.3535)  ( 1.00    -0.3390)
                     ( 1.00    -0.3184)  ( 1.00    -0.2105)  ( 0.00    -0.0626)
  
 Spin polar: 0 (Spin_A minus Spin_B electrons)

 CYCLE    4
  SDIIS (wt  1.000):  0.5230 -0.1991  0.6761
  DIIS coefficients:  0.5230 -0.1991  0.6761
 SCF Error: norm([F,P])=      0.006264888138, max([F,P])=      0.000796399332
 ***** SPIN 1 *****
 orbitals (Q,E):
 ---------------
 A :3...13           ( 1.00    -0.6477)  ( 1.00    -0.4823)  ( 1.00    -0.4185)  ( 1.00    -0.4154)
                     ( 1.00    -0.4051)  ( 1.00    -0.3627)  ( 1.00    -0.3528)  ( 1.00    -0.3386)
                     ( 1.00    -0.3174)  ( 1.00    -0.2095)  ( 0.00    -0.0616)
 ***** SPIN 2 *****
 orbitals (Q,E):
 ---------------
 A :3...13           ( 1.00    -0.6477)  ( 1.00    -0.4823)  ( 1.00    -0.4185)  ( 1.00    -0.4154)
                     ( 1.00    -0.4051)  ( 1.00    -0.3627)  ( 1.00    -0.3528)  ( 1.00    -0.3386)
                     ( 1.00    -0.3174)  ( 1.00    -0.2095)  ( 0.00    -0.0616)
  
 Spin polar: 0 (Spin_A minus Spin_B electrons)

 CYCLE    5
  SDIIS (wt  1.000):  0.5383 -0.5238  0.4435  0.5420
  DIIS coefficients:  0.5383 -0.5238  0.4435  0.5420
 SCF Error: norm([F,P])=      0.002012824086, max([F,P])=      0.000356658147
 ***** SPIN 1 *****
 orbitals (Q,E):
 ---------------
 A :3...13           ( 1.00    -0.6477)  ( 1.00    -0.4824)  ( 1.00    -0.4186)  ( 1.00    -0.4155)
                     ( 1.00    -0.4051)  ( 1.00    -0.3627)  ( 1.00    -0.3528)  ( 1.00    -0.3387)
                     ( 1.00    -0.3174)  ( 1.00    -0.2095)  ( 0.00    -0.0617)
 ***** SPIN 2 *****
 orbitals (Q,E):
 ---------------
 A :3...13           ( 1.00    -0.6477)  ( 1.00    -0.4824)  ( 1.00    -0.4186)  ( 1.00    -0.4155)
                     ( 1.00    -0.4051)  ( 1.00    -0.3627)  ( 1.00    -0.3528)  ( 1.00    -0.3387)
                     ( 1.00    -0.3174)  ( 1.00    -0.2095)  ( 0.00    -0.0617)
  
 Spin polar: 0 (Spin_A minus Spin_B electrons)

 CYCLE    6
  SDIIS (wt  1.000):  0.1808 -0.1881  0.1286  0.1790  0.6997
  DIIS coefficients:  0.1808 -0.1881  0.1286  0.1790  0.6997
 SCF Error: norm([F,P])=      0.000161913466, max([F,P])=      0.000019472650
 ***** SPIN 1 *****
 orbitals (Q,E):
 ---------------
 A :3...13           ( 1.00    -0.6477)  ( 1.00    -0.4824)  ( 1.00    -0.4186)  ( 1.00    -0.4155)
                     ( 1.00    -0.4051)  ( 1.00    -0.3627)  ( 1.00    -0.3528)  ( 1.00    -0.3387)
                     ( 1.00    -0.3174)  ( 1.00    -0.2094)  ( 0.00    -0.0616)
 ***** SPIN 2 *****
 orbitals (Q,E):
 ---------------
 A :3...13           ( 1.00    -0.6477)  ( 1.00    -0.4824)  ( 1.00    -0.4186)  ( 1.00    -0.4155)
                     ( 1.00    -0.4051)  ( 1.00    -0.3627)  ( 1.00    -0.3528)  ( 1.00    -0.3387)
                     ( 1.00    -0.3174)  ( 1.00    -0.2094)  ( 0.00    -0.0616)
  
 Spin polar: 0 (Spin_A minus Spin_B electrons)

 CYCLE    7
  SDIIS (wt  1.000):  0.0709 -0.0751  0.0480  0.0730  0.3622  0.5211
  DIIS coefficients:  0.0709 -0.0751  0.0480  0.0730  0.3622  0.5211
 SCF Error: norm([F,P])=      0.000037704950, max([F,P])=      0.000002451736
 ***** SPIN 1 *****
 orbitals (Q,E):
 ---------------
 A :3...13           ( 1.00    -0.6477)  ( 1.00    -0.4824)  ( 1.00    -0.4186)  ( 1.00    -0.4155)
                     ( 1.00    -0.4051)  ( 1.00    -0.3627)  ( 1.00    -0.3528)  ( 1.00    -0.3387)
                     ( 1.00    -0.3174)  ( 1.00    -0.2094)  ( 0.00    -0.0616)
 ***** SPIN 2 *****
 orbitals (Q,E):
 ---------------
 A :3...13           ( 1.00    -0.6477)  ( 1.00    -0.4824)  ( 1.00    -0.4186)  ( 1.00    -0.4155)
                     ( 1.00    -0.4051)  ( 1.00    -0.3627)  ( 1.00    -0.3528)  ( 1.00    -0.3387)
                     ( 1.00    -0.3174)  ( 1.00    -0.2094)  ( 0.00    -0.0616)
  
 Spin polar: 0 (Spin_A minus Spin_B electrons)

 CYCLE    8
  SDIIS (wt  1.000):  0.0105 -0.0110  0.0070  0.0132  0.0813  0.2204  0.6787
  DIIS coefficients:  0.0105 -0.0110  0.0070  0.0132  0.0813  0.2204  0.6787
 SCF Error: norm([F,P])=      0.000010137948, max([F,P])=      0.000001316601
 ***** SPIN 1 *****
 orbitals (Q,E):
 ---------------
 A :3...13           ( 1.00    -0.6477)  ( 1.00    -0.4824)  ( 1.00    -0.4186)  ( 1.00    -0.4155)
                     ( 1.00    -0.4051)  ( 1.00    -0.3627)  ( 1.00    -0.3528)  ( 1.00    -0.3387)
                     ( 1.00    -0.3174)  ( 1.00    -0.2094)  ( 0.00    -0.0616)
 ***** SPIN 2 *****
 orbitals (Q,E):
 ---------------
 A :3...13           ( 1.00    -0.6477)  ( 1.00    -0.4824)  ( 1.00    -0.4186)  ( 1.00    -0.4155)
                     ( 1.00    -0.4051)  ( 1.00    -0.3627)  ( 1.00    -0.3528)  ( 1.00    -0.3387)
                     ( 1.00    -0.3174)  ( 1.00    -0.2094)  ( 0.00    -0.0616)
  
 Spin polar: 0 (Spin_A minus Spin_B electrons)

 CYCLE    9
  SDIIS (wt  1.000):  0.0008 -0.0008  0.0005  0.0015  0.0117  0.0474  0.1856  0.7534
  DIIS coefficients:  0.0008 -0.0008  0.0005  0.0015  0.0117  0.0474  0.1856  0.7534
 SCF Error: norm([F,P])=      0.000000884560, max([F,P])=      0.000000064744
 ***** SPIN 1 *****
 orbitals (Q,E):
 ---------------
 A :3...13           ( 1.00    -0.6477)  ( 1.00    -0.4824)  ( 1.00    -0.4186)  ( 1.00    -0.4155)
                     ( 1.00    -0.4051)  ( 1.00    -0.3627)  ( 1.00    -0.3528)  ( 1.00    -0.3387)
                     ( 1.00    -0.3174)  ( 1.00    -0.2094)  ( 0.00    -0.0616)
 ***** SPIN 2 *****
 orbitals (Q,E):
 ---------------
 A :3...13           ( 1.00    -0.6477)  ( 1.00    -0.4824)  ( 1.00    -0.4186)  ( 1.00    -0.4155)
                     ( 1.00    -0.4051)  ( 1.00    -0.3627)  ( 1.00    -0.3528)  ( 1.00    -0.3387)
                     ( 1.00    -0.3174)  ( 1.00    -0.2094)  ( 0.00    -0.0616)
  
 Spin polar: 0 (Spin_A minus Spin_B electrons)

 CYCLE   10
  SDIIS (wt  1.000): -0.0000  0.0001 -0.0000 -0.0000  0.0008  0.0079  0.0370  0.2834  0.6709
  DIIS coefficients: -0.0000  0.0001 -0.0000 -0.0000  0.0008  0.0079  0.0370  0.2834  0.6709
 SCF Error: norm([F,P])=      0.000000365571, max([F,P])=      0.000000054014
 ***** SPIN 1 *****
 orbitals (Q,E):
 ---------------
 A :3...13           ( 1.00    -0.6477)  ( 1.00    -0.4824)  ( 1.00    -0.4186)  ( 1.00    -0.4155)
                     ( 1.00    -0.4051)  ( 1.00    -0.3627)  ( 1.00    -0.3528)  ( 1.00    -0.3387)
                     ( 1.00    -0.3174)  ( 1.00    -0.2094)  ( 0.00    -0.0616)
 ***** SPIN 2 *****
 orbitals (Q,E):
 ---------------
 A :3...13           ( 1.00    -0.6477)  ( 1.00    -0.4824)  ( 1.00    -0.4186)  ( 1.00    -0.4155)
                     ( 1.00    -0.4051)  ( 1.00    -0.3627)  ( 1.00    -0.3528)  ( 1.00    -0.3387)
                     ( 1.00    -0.3174)  ( 1.00    -0.2094)  ( 0.00    -0.0616)
  
 Spin polar: 0 (Spin_A minus Spin_B electrons)

 CYCLE   11
  SDIIS (wt  1.000): -0.0000  0.0000 -0.0000 -0.0000 -0.0000  0.0012  0.0063  0.0565  0.1649  0.7712
  DIIS coefficients: -0.0000  0.0000 -0.0000 -0.0000 -0.0000  0.0012  0.0063  0.0565  0.1649  0.7712
 SCF Error: norm([F,P])=      0.000000020847, max([F,P])=      0.000000002332
 ***** SPIN 1 *****
 orbitals (Q,E):
 ---------------
 A :3...13           ( 1.00    -0.6477)  ( 1.00    -0.4824)  ( 1.00    -0.4186)  ( 1.00    -0.4155)
                     ( 1.00    -0.4051)  ( 1.00    -0.3627)  ( 1.00    -0.3528)  ( 1.00    -0.3387)
                     ( 1.00    -0.3174)  ( 1.00    -0.2094)  ( 0.00    -0.0616)
 ***** SPIN 2 *****
 orbitals (Q,E):
 ---------------
 A :3...13           ( 1.00    -0.6477)  ( 1.00    -0.4824)  ( 1.00    -0.4186)  ( 1.00    -0.4155)
                     ( 1.00    -0.4051)  ( 1.00    -0.3627)  ( 1.00    -0.3528)  ( 1.00    -0.3387)
                     ( 1.00    -0.3174)  ( 1.00    -0.2094)  ( 0.00    -0.0616)
  
 Spin polar: 0 (Spin_A minus Spin_B electrons)

 SCF CONVERGED

 CYCLE   12
 *** Setting up for NEW gradients in Focky
 *** Using FIT density in Focky
 ***** SPIN 1 *****
 orbitals (Q,E):
 ---------------
 A :3...22           ( 1.00    -0.6477)  ( 1.00    -0.4824)  ( 1.00    -0.4186)  ( 1.00    -0.4155)
                     ( 1.00    -0.4051)  ( 1.00    -0.3627)  ( 1.00    -0.3528)  ( 1.00    -0.3387)
                     ( 1.00    -0.3174)  ( 1.00    -0.2094)  ( 0.00    -0.0616)  ( 0.00    -0.0128)
                     ( 0.00     0.0283)  ( 0.00     0.0407)  ( 0.00     0.0499)  ( 0.00     0.0755)
                     ( 0.00     0.0841)  ( 0.00     0.0858)  ( 0.00     0.1176)  ( 0.00     0.1544)
 ***** SPIN 2 *****
 orbitals (Q,E):
 ---------------
 A :3...22           ( 1.00    -0.6477)  ( 1.00    -0.4824)  ( 1.00    -0.4186)  ( 1.00    -0.4155)
                     ( 1.00    -0.4051)  ( 1.00    -0.3627)  ( 1.00    -0.3528)  ( 1.00    -0.3387)
                     ( 1.00    -0.3174)  ( 1.00    -0.2094)  ( 0.00    -0.0616)  ( 0.00    -0.0128)
                     ( 0.00     0.0283)  ( 0.00     0.0407)  ( 0.00     0.0499)  ( 0.00     0.0755)
                     ( 0.00     0.0841)  ( 0.00     0.0858)  ( 0.00     0.1176)  ( 0.00     0.1544)
  
 Spin polar: 0 (Spin_A minus Spin_B electrons)


 Fit test: (difference of exact and fit density, squared integrated, result summed over spins)
         SCF:                                          0.00001086734821

 Gross Charges per Atom (Z minus electrons)
 ==========================================
             0.5998    0.3874    0.3874   -0.5474   -0.1354   -0.1428   -0.1354   -0.1354   -0.1354   -0.1428
 Net Total:  0.00000000


 =================================================================
 M U L T I P O L E   D E R I V E D   C H A R G E   A N A L Y S I S
 =================================================================

 See: M. Swart, P.Th. van Duijnen, J.G. Snijders, J.Comput.Chem., (2001), p. 79-88.

 ----------------------------------------------------- 
 MDC atomic charges (includes spinA + spinB electrons)
 ----------------------------------------------------- 

        Atom    Level:     MDC-m        MDC-d        MDC-q
 ---------------------------------------------------------
     1     C            0.246783     0.303450     0.394634
     2     C            0.206646     0.170781     0.300914
     3     C            0.206645     0.170781     0.300912
     4     O           -0.358638    -0.463097    -0.521095
     5     H           -0.052280    -0.035628    -0.090344
     6     H           -0.046157    -0.019701    -0.056994
     7     H           -0.052280    -0.035628    -0.090343
     8     H           -0.052280    -0.035628    -0.090344
     9     H           -0.052280    -0.035628    -0.090344
    10     H           -0.046157    -0.019701    -0.056995

 -------------------------------- 
 MDC spin density (spinA - spinB)
 -------------------------------- 

        Atom    Level:     MDC-m        MDC-d        MDC-q
 ---------------------------------------------------------
     1     C           -0.000000    -0.000000    -0.000000
     2     C           -0.000000    -0.000000    -0.000000
     3     C            0.000000     0.000000     0.000000
     4     O            0.000000     0.000000     0.000000
     5     H           -0.000000    -0.000000    -0.000000
     6     H            0.000000     0.000000     0.000000
     7     H           -0.000000     0.000000    -0.000000
     8     H            0.000000    -0.000000     0.000000
     9     H            0.000000     0.000000     0.000000
    10     H            0.000000     0.000000     0.000000


 ==========
 S**2 value  ***  see also R. Bulo et al., J.Am.Chem.Soc., 124 (2002) 13903-13910, note (29)  ***
 ==========
  
                                       exact      expectation value

 Total S2 (S squared)                  0.00000             0.00000
 *** Using NEW gradient routines ***


 Geometry CYCLE 3
 ==============

 Energy gradients wrt nuclear displacements
 ==========================================

     Atom      Cartesian (a.u./angstrom)
                 X         Y         Z
 ----------------------------------------
     1 C    -0.000000  0.000000 -0.008079
     2 C     0.002351  0.000000 -0.000257
     3 C    -0.002351 -0.000000 -0.000256
     4 O     0.000000 -0.000000  0.008993
     5 H     0.000614 -0.000771 -0.000529
     6 H    -0.001198 -0.000000  0.000857
     7 H     0.000614  0.000771 -0.000529
     8 H    -0.000614  0.000771 -0.000529
     9 H    -0.000614 -0.000771 -0.000529
    10 H     0.001198  0.000000  0.000857
 ----------------------------------------

 dE(predicted):    -0.20185E-03, dE(actual):    -0.16556E-03, Trust radius:    0.632456, all in a.u.
 
----------------------------------------------------------------------
Geometry Convergence after Step   3       (Hartree/Angstrom,Angstrom)
----------------------------------------------------------------------
current energy                               -2.05515262 Hartree
energy change                      -0.00016556     0.00100000    T
constrained gradient max            0.00899309     0.00100000    F
constrained gradient rms            0.00235712     0.00066667    F
gradient max                        0.00899309
gradient rms                        0.00235712
cart. step max                      0.00332567     0.01000000    T
cart. step rms                      0.00126091     0.00666667    T
 


 Coordinates (Cartesian)
 =======================

     Atom                    bohr                                 angstrom                 Geometric Variables
                   X           Y           Z              X           Y           Z       (0:frozen, *:LT par.)
 --------------------------------------------------------------------------------------------------------------
     1 C      -0.000000   -0.000001   -1.172700      -0.000000   -0.000001   -0.620566      1       2       3
     2 C      -2.434809    0.000003    0.336771      -1.288446    0.000002    0.178211      4       5       6
     3 C       2.434815    0.000003    0.336760       1.288448    0.000002    0.178206      7       8       9
     4 O      -0.000005   -0.000005   -3.477549      -0.000003   -0.000003   -1.840239     10      11      12
     5 H       2.514895    1.666084    1.577700       1.330825    0.881654    0.834883     13      14      15
     6 H       4.062835    0.000019   -0.938843       2.149960    0.000010   -0.496815     16      17      18
     7 H       2.514915   -1.666094    1.577678       1.330836   -0.881659    0.834871     19      20      21
     8 H      -2.514889   -1.666076    1.577713      -1.330822   -0.881649    0.834890     22      23      24
     9 H      -2.514903    1.666105    1.577681      -1.330829    0.881665    0.834873     25      26      27
    10 H      -4.062833   -0.000014   -0.938828      -2.149959   -0.000008   -0.496806     28      29      30
 --------------------------------------------------------------------------------------------------------------

 Number of elements of the density matrix on this node (used, total):      1275     17766


 ===========================================
 Numerical Integration : Fuzzy Cells (Becke)
 ===========================================
  
 Becke grid quality: GOOD           
  
 Lebedev angular grid order:             min:  11 max:  31
 Nr. of radial points:                   min:  54 max:  61

 Total nr. of points:     122544
 Nr. of blocks:              958
 Block length:               128
 Nr. of dummy points:         80


 Test of Precision of the Numerical Integration Grid
 ===================================================

 Integral of the Total Core Density:                   7.99999987465058
 Relative Error:                                      -1.567E-08


 ========================
 Density Fitting (zlmFit)
 ========================
  
 ZlmFit Fit Quality: GOOD           
  
 Max L-expansion:                        min:   8 max:   9
 Nr. of radial interpolation points:     min:  78 max:  96


 =====
 S C F  ***  ScaSCF  ***
 =====
  
 Initial density matrix is taken from previous geometry

 CYCLE    1
 SCF Error: norm([F,P])=      0.005949817458, max([F,P])=      0.000857736060
 ***** SPIN 1 *****
 orbitals (Q,E):
 ---------------
 A :3...22           ( 1.00    -0.6484)  ( 1.00    -0.4832)  ( 1.00    -0.4192)  ( 1.00    -0.4158)
                     ( 1.00    -0.4059)  ( 1.00    -0.3634)  ( 1.00    -0.3533)  ( 1.00    -0.3398)
                     ( 1.00    -0.3179)  ( 1.00    -0.2106)  ( 0.00    -0.0635)  ( 0.00    -0.0134)
                     ( 0.00     0.0278)  ( 0.00     0.0400)  ( 0.00     0.0491)  ( 0.00     0.0748)
                     ( 0.00     0.0833)  ( 0.00     0.0853)  ( 0.00     0.1168)  ( 0.00     0.1534)
 ***** SPIN 2 *****
 orbitals (Q,E):
 ---------------
 A :3...22           ( 1.00    -0.6484)  ( 1.00    -0.4832)  ( 1.00    -0.4192)  ( 1.00    -0.4158)
                     ( 1.00    -0.4059)  ( 1.00    -0.3634)  ( 1.00    -0.3533)  ( 1.00    -0.3398)
                     ( 1.00    -0.3179)  ( 1.00    -0.2106)  ( 0.00    -0.0635)  ( 0.00    -0.0134)
                     ( 0.00     0.0278)  ( 0.00     0.0400)  ( 0.00     0.0491)  ( 0.00     0.0748)
                     ( 0.00     0.0833)  ( 0.00     0.0853)  ( 0.00     0.1168)  ( 0.00     0.1534)
  
 Spin polar: 0 (Spin_A minus Spin_B electrons)

 CYCLE    2
  SDIIS (wt  0.000):  0.3250  0.6750
 A-DIIS (wt  1.000):  0.0000  1.0000
  DIIS coefficients:  0.0000  1.0000
 SCF Error: norm([F,P])=      0.003881676425, max([F,P])=      0.000473475219
 ***** SPIN 1 *****
 orbitals (Q,E):
 ---------------
 A :3...13           ( 1.00    -0.6474)  ( 1.00    -0.4820)  ( 1.00    -0.4180)  ( 1.00    -0.4144)
                     ( 1.00    -0.4047)  ( 1.00    -0.3628)  ( 1.00    -0.3520)  ( 1.00    -0.3389)
                     ( 1.00    -0.3161)  ( 1.00    -0.2087)  ( 0.00    -0.0615)
 ***** SPIN 2 *****
 orbitals (Q,E):
 ---------------
 A :3...13           ( 1.00    -0.6474)  ( 1.00    -0.4820)  ( 1.00    -0.4180)  ( 1.00    -0.4144)
                     ( 1.00    -0.4047)  ( 1.00    -0.3628)  ( 1.00    -0.3520)  ( 1.00    -0.3389)
                     ( 1.00    -0.3161)  ( 1.00    -0.2087)  ( 0.00    -0.0615)
  
 Spin polar: 0 (Spin_A minus Spin_B electrons)

 CYCLE    3
  SDIIS (wt  0.000):  0.0510  0.5675  0.3815
 A-DIIS (wt  1.000):  0.0000  0.6447  0.3553
  DIIS coefficients:  0.0000  0.6447  0.3553
 SCF Error: norm([F,P])=      0.005637585520, max([F,P])=      0.000565462927
 ***** SPIN 1 *****
 orbitals (Q,E):
 ---------------
 A :3...13           ( 1.00    -0.6476)  ( 1.00    -0.4823)  ( 1.00    -0.4182)  ( 1.00    -0.4148)
                     ( 1.00    -0.4050)  ( 1.00    -0.3628)  ( 1.00    -0.3523)  ( 1.00    -0.3391)
                     ( 1.00    -0.3166)  ( 1.00    -0.2092)  ( 0.00    -0.0622)
 ***** SPIN 2 *****
 orbitals (Q,E):
 ---------------
 A :3...13           ( 1.00    -0.6476)  ( 1.00    -0.4823)  ( 1.00    -0.4182)  ( 1.00    -0.4148)
                     ( 1.00    -0.4050)  ( 1.00    -0.3628)  ( 1.00    -0.3523)  ( 1.00    -0.3391)
                     ( 1.00    -0.3166)  ( 1.00    -0.2092)  ( 0.00    -0.0622)
  
 Spin polar: 0 (Spin_A minus Spin_B electrons)

 CYCLE    4
  SDIIS (wt  1.000):  0.2496  0.1001  0.6503
  DIIS coefficients:  0.2496  0.1001  0.6503
 SCF Error: norm([F,P])=      0.000765173293, max([F,P])=      0.000077964704
 ***** SPIN 1 *****
 orbitals (Q,E):
 ---------------
 A :3...13           ( 1.00    -0.6476)  ( 1.00    -0.4824)  ( 1.00    -0.4183)  ( 1.00    -0.4148)
                     ( 1.00    -0.4051)  ( 1.00    -0.3627)  ( 1.00    -0.3524)  ( 1.00    -0.3391)
                     ( 1.00    -0.3167)  ( 1.00    -0.2094)  ( 0.00    -0.0623)
 ***** SPIN 2 *****
 orbitals (Q,E):
 ---------------
 A :3...13           ( 1.00    -0.6476)  ( 1.00    -0.4824)  ( 1.00    -0.4183)  ( 1.00    -0.4148)
                     ( 1.00    -0.4051)  ( 1.00    -0.3627)  ( 1.00    -0.3524)  ( 1.00    -0.3391)
                     ( 1.00    -0.3167)  ( 1.00    -0.2094)  ( 0.00    -0.0623)
  
 Spin polar: 0 (Spin_A minus Spin_B electrons)

 CYCLE    5
  SDIIS (wt  1.000):  0.1269  0.0249  0.5313  0.3169
  DIIS coefficients:  0.1269  0.0249  0.5313  0.3169
 SCF Error: norm([F,P])=      0.000726371768, max([F,P])=      0.000117150727
 ***** SPIN 1 *****
 orbitals (Q,E):
 ---------------
 A :3...13           ( 1.00    -0.6476)  ( 1.00    -0.4823)  ( 1.00    -0.4183)  ( 1.00    -0.4148)
                     ( 1.00    -0.4051)  ( 1.00    -0.3628)  ( 1.00    -0.3524)  ( 1.00    -0.3391)
                     ( 1.00    -0.3167)  ( 1.00    -0.2094)  ( 0.00    -0.0623)
 ***** SPIN 2 *****
 orbitals (Q,E):
 ---------------
 A :3...13           ( 1.00    -0.6476)  ( 1.00    -0.4823)  ( 1.00    -0.4183)  ( 1.00    -0.4148)
                     ( 1.00    -0.4051)  ( 1.00    -0.3628)  ( 1.00    -0.3524)  ( 1.00    -0.3391)
                     ( 1.00    -0.3167)  ( 1.00    -0.2094)  ( 0.00    -0.0623)
  
 Spin polar: 0 (Spin_A minus Spin_B electrons)

 CYCLE    6
  SDIIS (wt  1.000):  0.0360 -0.0001  0.1921  0.1491  0.6229
  DIIS coefficients:  0.0360 -0.0001  0.1921  0.1491  0.6229
 SCF Error: norm([F,P])=      0.000068039729, max([F,P])=      0.000008580945
 ***** SPIN 1 *****
 orbitals (Q,E):
 ---------------
 A :3...13           ( 1.00    -0.6476)  ( 1.00    -0.4824)  ( 1.00    -0.4183)  ( 1.00    -0.4148)
                     ( 1.00    -0.4051)  ( 1.00    -0.3628)  ( 1.00    -0.3524)  ( 1.00    -0.3391)
                     ( 1.00    -0.3167)  ( 1.00    -0.2094)  ( 0.00    -0.0623)
 ***** SPIN 2 *****
 orbitals (Q,E):
 ---------------
 A :3...13           ( 1.00    -0.6476)  ( 1.00    -0.4824)  ( 1.00    -0.4183)  ( 1.00    -0.4148)
                     ( 1.00    -0.4051)  ( 1.00    -0.3628)  ( 1.00    -0.3524)  ( 1.00    -0.3391)
                     ( 1.00    -0.3167)  ( 1.00    -0.2094)  ( 0.00    -0.0623)
  
 Spin polar: 0 (Spin_A minus Spin_B electrons)

 CYCLE    7
  SDIIS (wt  1.000):  0.0097 -0.0018  0.0605  0.0496  0.2765  0.6056
  DIIS coefficients:  0.0097 -0.0018  0.0605  0.0496  0.2765  0.6056
 SCF Error: norm([F,P])=      0.000011830313, max([F,P])=      0.000000814360
 ***** SPIN 1 *****
 orbitals (Q,E):
 ---------------
 A :3...13           ( 1.00    -0.6476)  ( 1.00    -0.4824)  ( 1.00    -0.4183)  ( 1.00    -0.4148)
                     ( 1.00    -0.4051)  ( 1.00    -0.3628)  ( 1.00    -0.3524)  ( 1.00    -0.3391)
                     ( 1.00    -0.3167)  ( 1.00    -0.2094)  ( 0.00    -0.0623)
 ***** SPIN 2 *****
 orbitals (Q,E):
 ---------------
 A :3...13           ( 1.00    -0.6476)  ( 1.00    -0.4824)  ( 1.00    -0.4183)  ( 1.00    -0.4148)
                     ( 1.00    -0.4051)  ( 1.00    -0.3628)  ( 1.00    -0.3524)  ( 1.00    -0.3391)
                     ( 1.00    -0.3167)  ( 1.00    -0.2094)  ( 0.00    -0.0623)
  
 Spin polar: 0 (Spin_A minus Spin_B electrons)

 CYCLE    8
  SDIIS (wt  1.000):  0.0034 -0.0007  0.0211  0.0165  0.1067  0.3189  0.5342
  DIIS coefficients:  0.0034 -0.0007  0.0211  0.0165  0.1067  0.3189  0.5342
 SCF Error: norm([F,P])=      0.000004060607, max([F,P])=      0.000000357178
 ***** SPIN 1 *****
 orbitals (Q,E):
 ---------------
 A :3...13           ( 1.00    -0.6476)  ( 1.00    -0.4824)  ( 1.00    -0.4183)  ( 1.00    -0.4148)
                     ( 1.00    -0.4051)  ( 1.00    -0.3628)  ( 1.00    -0.3524)  ( 1.00    -0.3391)
                     ( 1.00    -0.3167)  ( 1.00    -0.2094)  ( 0.00    -0.0623)
 ***** SPIN 2 *****
 orbitals (Q,E):
 ---------------
 A :3...13           ( 1.00    -0.6476)  ( 1.00    -0.4824)  ( 1.00    -0.4183)  ( 1.00    -0.4148)
                     ( 1.00    -0.4051)  ( 1.00    -0.3628)  ( 1.00    -0.3524)  ( 1.00    -0.3391)
                     ( 1.00    -0.3167)  ( 1.00    -0.2094)  ( 0.00    -0.0623)
  
 Spin polar: 0 (Spin_A minus Spin_B electrons)

 CYCLE    9
  SDIIS (wt  1.000):  0.0004 -0.0001  0.0025  0.0014  0.0152  0.0568  0.1446  0.7793
  DIIS coefficients:  0.0004 -0.0001  0.0025  0.0014  0.0152  0.0568  0.1446  0.7793
 SCF Error: norm([F,P])=      0.000000555902, max([F,P])=      0.000000073826
 ***** SPIN 1 *****
 orbitals (Q,E):
 ---------------
 A :3...13           ( 1.00    -0.6476)  ( 1.00    -0.4824)  ( 1.00    -0.4183)  ( 1.00    -0.4148)
                     ( 1.00    -0.4051)  ( 1.00    -0.3628)  ( 1.00    -0.3524)  ( 1.00    -0.3391)
                     ( 1.00    -0.3167)  ( 1.00    -0.2094)  ( 0.00    -0.0623)
 ***** SPIN 2 *****
 orbitals (Q,E):
 ---------------
 A :3...13           ( 1.00    -0.6476)  ( 1.00    -0.4824)  ( 1.00    -0.4183)  ( 1.00    -0.4148)
                     ( 1.00    -0.4051)  ( 1.00    -0.3628)  ( 1.00    -0.3524)  ( 1.00    -0.3391)
                     ( 1.00    -0.3167)  ( 1.00    -0.2094)  ( 0.00    -0.0623)
  
 Spin polar: 0 (Spin_A minus Spin_B electrons)

 CYCLE   10
  SDIIS (wt  1.000):  0.0000 -0.0000  0.0001  0.0000  0.0007  0.0051  0.0191  0.1912  0.7838
  DIIS coefficients:  0.0000 -0.0000  0.0001  0.0000  0.0007  0.0051  0.0191  0.1912  0.7838
 SCF Error: norm([F,P])=      0.000000118514, max([F,P])=      0.000000019747
 ***** SPIN 1 *****
 orbitals (Q,E):
 ---------------
 A :3...13           ( 1.00    -0.6476)  ( 1.00    -0.4824)  ( 1.00    -0.4183)  ( 1.00    -0.4148)
                     ( 1.00    -0.4051)  ( 1.00    -0.3628)  ( 1.00    -0.3524)  ( 1.00    -0.3391)
                     ( 1.00    -0.3167)  ( 1.00    -0.2094)  ( 0.00    -0.0623)
 ***** SPIN 2 *****
 orbitals (Q,E):
 ---------------
 A :3...13           ( 1.00    -0.6476)  ( 1.00    -0.4824)  ( 1.00    -0.4183)  ( 1.00    -0.4148)
                     ( 1.00    -0.4051)  ( 1.00    -0.3628)  ( 1.00    -0.3524)  ( 1.00    -0.3391)
                     ( 1.00    -0.3167)  ( 1.00    -0.2094)  ( 0.00    -0.0623)
  
 Spin polar: 0 (Spin_A minus Spin_B electrons)

 CYCLE   11
  SDIIS (wt  1.000): -0.0000  0.0000 -0.0000 -0.0000 -0.0001  0.0004  0.0028  0.0365  0.1867  0.7738
  DIIS coefficients: -0.0000  0.0000 -0.0000 -0.0000 -0.0001  0.0004  0.0028  0.0365  0.1867  0.7738
 SCF Error: norm([F,P])=      0.000000006321, max([F,P])=      0.000000000486
 ***** SPIN 1 *****
 orbitals (Q,E):
 ---------------
 A :3...13           ( 1.00    -0.6476)  ( 1.00    -0.4824)  ( 1.00    -0.4183)  ( 1.00    -0.4148)
                     ( 1.00    -0.4051)  ( 1.00    -0.3628)  ( 1.00    -0.3524)  ( 1.00    -0.3391)
                     ( 1.00    -0.3167)  ( 1.00    -0.2094)  ( 0.00    -0.0623)
 ***** SPIN 2 *****
 orbitals (Q,E):
 ---------------
 A :3...13           ( 1.00    -0.6476)  ( 1.00    -0.4824)  ( 1.00    -0.4183)  ( 1.00    -0.4148)
                     ( 1.00    -0.4051)  ( 1.00    -0.3628)  ( 1.00    -0.3524)  ( 1.00    -0.3391)
                     ( 1.00    -0.3167)  ( 1.00    -0.2094)  ( 0.00    -0.0623)
  
 Spin polar: 0 (Spin_A minus Spin_B electrons)

 SCF CONVERGED

 CYCLE   12
 *** Setting up for NEW gradients in Focky
 *** Using FIT density in Focky
 ***** SPIN 1 *****
 orbitals (Q,E):
 ---------------
 A :3...22           ( 1.00    -0.6476)  ( 1.00    -0.4824)  ( 1.00    -0.4183)  ( 1.00    -0.4148)
                     ( 1.00    -0.4051)  ( 1.00    -0.3628)  ( 1.00    -0.3524)  ( 1.00    -0.3391)
                     ( 1.00    -0.3167)  ( 1.00    -0.2094)  ( 0.00    -0.0623)  ( 0.00    -0.0129)
                     ( 0.00     0.0283)  ( 0.00     0.0405)  ( 0.00     0.0496)  ( 0.00     0.0753)
                     ( 0.00     0.0839)  ( 0.00     0.0858)  ( 0.00     0.1174)  ( 0.00     0.1541)
 ***** SPIN 2 *****
 orbitals (Q,E):
 ---------------
 A :3...22           ( 1.00    -0.6476)  ( 1.00    -0.4824)  ( 1.00    -0.4183)  ( 1.00    -0.4148)
                     ( 1.00    -0.4051)  ( 1.00    -0.3628)  ( 1.00    -0.3524)  ( 1.00    -0.3391)
                     ( 1.00    -0.3167)  ( 1.00    -0.2094)  ( 0.00    -0.0623)  ( 0.00    -0.0129)
                     ( 0.00     0.0283)  ( 0.00     0.0405)  ( 0.00     0.0496)  ( 0.00     0.0753)
                     ( 0.00     0.0839)  ( 0.00     0.0858)  ( 0.00     0.1174)  ( 0.00     0.1541)
  
 Spin polar: 0 (Spin_A minus Spin_B electrons)


 Fit test: (difference of exact and fit density, squared integrated, result summed over spins)
         SCF:                                          0.00001083238189

 Gross Charges per Atom (Z minus electrons)
 ==========================================
             0.5966    0.3867    0.3867   -0.5469   -0.1348   -0.1420   -0.1348   -0.1348   -0.1348   -0.1420
 Net Total:  0.00000000


 =================================================================
 M U L T I P O L E   D E R I V E D   C H A R G E   A N A L Y S I S
 =================================================================

 See: M. Swart, P.Th. van Duijnen, J.G. Snijders, J.Comput.Chem., (2001), p. 79-88.

 ----------------------------------------------------- 
 MDC atomic charges (includes spinA + spinB electrons)
 ----------------------------------------------------- 

        Atom    Level:     MDC-m        MDC-d        MDC-q
 ---------------------------------------------------------
     1     C            0.247039     0.302457     0.392824
     2     C            0.206775     0.170672     0.300286
     3     C            0.206775     0.170672     0.300283
     4     O           -0.360280    -0.463493    -0.520800
     5     H           -0.052230    -0.035404    -0.089892
     6     H           -0.045695    -0.019348    -0.056513
     7     H           -0.052230    -0.035403    -0.089890
     8     H           -0.052230    -0.035404    -0.089892
     9     H           -0.052230    -0.035403    -0.089891
    10     H           -0.045695    -0.019348    -0.056514

 -------------------------------- 
 MDC spin density (spinA - spinB)
 -------------------------------- 

        Atom    Level:     MDC-m        MDC-d        MDC-q
 ---------------------------------------------------------
     1     C           -0.000000    -0.000000     0.000000
     2     C           -0.000000    -0.000000    -0.000000
     3     C           -0.000000    -0.000000    -0.000000
     4     O           -0.000000    -0.000000    -0.000000
     5     H           -0.000000    -0.000000     0.000000
     6     H            0.000000     0.000000     0.000000
     7     H            0.000000     0.000000     0.000000
     8     H           -0.000000    -0.000000    -0.000000
     9     H            0.000000     0.000000    -0.000000
    10     H            0.000000     0.000000     0.000000


 ==========
 S**2 value  ***  see also R. Bulo et al., J.Am.Chem.Soc., 124 (2002) 13903-13910, note (29)  ***
 ==========
  
                                       exact      expectation value

 Total S2 (S squared)                  0.00000             0.00000
 *** Using NEW gradient routines ***


 Geometry CYCLE 4
 ==============

 Energy gradients wrt nuclear displacements
 ==========================================

     Atom      Cartesian (a.u./angstrom)
                 X         Y         Z
 ----------------------------------------
     1 C    -0.000000 -0.000000  0.000325
     2 C     0.000845  0.000000  0.000073
     3 C    -0.000845 -0.000000  0.000073
     4 O     0.000000  0.000000 -0.000226
     5 H     0.000297 -0.000337 -0.000181
     6 H    -0.000079 -0.000000  0.000240
     7 H     0.000297  0.000338 -0.000181
     8 H    -0.000297  0.000337 -0.000181
     9 H    -0.000297 -0.000338 -0.000181
    10 H     0.000079  0.000000  0.000240
 ----------------------------------------

 dE(predicted):    -0.24292E-04, dE(actual):    -0.25298E-04, Trust radius:    0.632456, all in a.u.
 
---------------------------------------------------------
Geometry Convergence after Step   4       ** CONVERGED **
---------------------------------------------------------
current energy                               -2.05517792 Hartree
energy change                      -0.00002530     0.00100000    T
constrained gradient max            0.00084519     0.00100000    T
constrained gradient rms            0.00029802     0.00066667    T
gradient max                        0.00084519
gradient rms                        0.00029802
cart. step max                      0.00154469     0.01000000    T
cart. step rms                      0.00062048     0.00666667    T
 

 Number of elements of the density matrix on this node (used, total):      1275     17766


 ===========================================
 Numerical Integration : Fuzzy Cells (Becke)
 ===========================================
  
 Becke grid quality: GOOD           
  
 Lebedev angular grid order:             min:  11 max:  31
 Nr. of radial points:                   min:  54 max:  61

 Total nr. of points:     122544
 Nr. of blocks:              958
 Block length:               128
 Nr. of dummy points:         80


 Test of Precision of the Numerical Integration Grid
 ===================================================

 Integral of the Total Core Density:                   7.99999987465058
 Relative Error:                                      -1.567E-08


 ========================
 Density Fitting (zlmFit)
 ========================
  
 ZlmFit Fit Quality: GOOD           
  
 Max L-expansion:                        min:   8 max:   9
 Nr. of radial interpolation points:     min:  78 max:  96


 =====
 S C F  ***  ScaSCF  ***
 =====
  
 Initial density matrix is taken from previous geometry

 CYCLE    1
 SCF Error: norm([F,P])=      0.000000000050, max([F,P])=      0.000000000008
 ***** SPIN 1 *****
 orbitals (Q,E):
 ---------------
 A :3...22           ( 1.00    -0.6476)  ( 1.00    -0.4824)  ( 1.00    -0.4183)  ( 1.00    -0.4148)
                     ( 1.00    -0.4051)  ( 1.00    -0.3628)  ( 1.00    -0.3524)  ( 1.00    -0.3391)
                     ( 1.00    -0.3167)  ( 1.00    -0.2094)  ( 0.00    -0.0623)  ( 0.00    -0.0129)
                     ( 0.00     0.0283)  ( 0.00     0.0405)  ( 0.00     0.0496)  ( 0.00     0.0753)
                     ( 0.00     0.0839)  ( 0.00     0.0858)  ( 0.00     0.1174)  ( 0.00     0.1541)
 ***** SPIN 2 *****
 orbitals (Q,E):
 ---------------
 A :3...22           ( 1.00    -0.6476)  ( 1.00    -0.4824)  ( 1.00    -0.4183)  ( 1.00    -0.4148)
                     ( 1.00    -0.4051)  ( 1.00    -0.3628)  ( 1.00    -0.3524)  ( 1.00    -0.3391)
                     ( 1.00    -0.3167)  ( 1.00    -0.2094)  ( 0.00    -0.0623)  ( 0.00    -0.0129)
                     ( 0.00     0.0283)  ( 0.00     0.0405)  ( 0.00     0.0496)  ( 0.00     0.0753)
                     ( 0.00     0.0839)  ( 0.00     0.0858)  ( 0.00     0.1174)  ( 0.00     0.1541)
  
 Spin polar: 0 (Spin_A minus Spin_B electrons)

 CYCLE    2
  SDIIS (wt  0.000):  0.6642  0.3358
 A-DIIS (wt  1.000):  0.0000  1.0000
  DIIS coefficients:  0.0000  1.0000
 SCF Error: norm([F,P])=      0.000000000089, max([F,P])=      0.000000000021
 ***** SPIN 1 *****
 orbitals (Q,E):
 ---------------
 A :3...13           ( 1.00    -0.6476)  ( 1.00    -0.4824)  ( 1.00    -0.4183)  ( 1.00    -0.4148)
                     ( 1.00    -0.4051)  ( 1.00    -0.3628)  ( 1.00    -0.3524)  ( 1.00    -0.3391)
                     ( 1.00    -0.3167)  ( 1.00    -0.2094)  ( 0.00    -0.0623)
 ***** SPIN 2 *****
 orbitals (Q,E):
 ---------------
 A :3...13           ( 1.00    -0.6476)  ( 1.00    -0.4824)  ( 1.00    -0.4183)  ( 1.00    -0.4148)
                     ( 1.00    -0.4051)  ( 1.00    -0.3628)  ( 1.00    -0.3524)  ( 1.00    -0.3391)
                     ( 1.00    -0.3167)  ( 1.00    -0.2094)  ( 0.00    -0.0623)
  
 Spin polar: 0 (Spin_A minus Spin_B electrons)

 SCF CONVERGED

 CYCLE    3
1
 ***************************************************************************************************


                                                *******************
                                                *  R E S U L T S  *
                                                *******************
  
 Max allowed memory usage for fit           16777216000
 Memory usage for atom           1               6457344
 Memory usage for atom           2               6457344
 Memory usage for atom           3               6457344
 Memory usage for atom           4               6457344
 Memory usage for atom           5               2231280
 Memory usage for atom           6               2231280
 Memory usage for atom           7               2231280
 Memory usage for atom           8               2231280
 Memory usage for atom           9               2231280
 Memory usage for atom          10               2231280
 Start,  end atoms for each pass
     1    10
 Hartree-Fock: Doing       10 atoms in this pass
 ============= Using       31 Mbytes of shared memory for fitfit integrals and coeffs
 exenergy =   9.86342201829433        2.46585550457358     
 Max allowed memory usage for fit           16777216000
 Memory usage for atom           1               6457344
 Memory usage for atom           2               6457344
 Memory usage for atom           3               6457344
 Memory usage for atom           4               6457344
 Memory usage for atom           5               2231280
 Memory usage for atom           6               2231280
 Memory usage for atom           7               2231280
 Memory usage for atom           8               2231280
 Memory usage for atom           9               2231280
 Memory usage for atom          10               2231280
 Start,  end atoms for each pass
     1    10
 Hartree-Fock: Doing       10 atoms in this pass
 ============= Using       31 Mbytes of shared memory for fitfit integrals and coeffs
 exenergy =   9.86342201829435        2.46585550457359     
  
 Hartree-Fock exchange energy:   -9.86342201829434     
 *** Setting up for NEW gradients in Focky
 *** Using FIT density in Focky


                                   ***** SPIN 1 *****

 Scaled ZORA Orbital Energies, per Irrep and Spin:
 =================================================
                        Occup              E (au)              E (eV)       Diff (eV) with prev. cycle
                        -----      --------------------        ------       --------------------------
 A
               3        1.000     -0.64761158244908E+00       -17.622              -7.23E-10
               4        1.000     -0.48235202875234E+00       -13.125              -2.62E-10
               5        1.000     -0.41828854187192E+00       -11.382              -4.57E-10
               6        1.000     -0.41483975112757E+00       -11.288              -3.29E-10
               7        1.000     -0.40508744612677E+00       -11.023               4.67E-10
               8        1.000     -0.36276074442265E+00        -9.871              -6.88E-10
               9        1.000     -0.35241265380567E+00        -9.590               6.30E-10
              10        1.000     -0.33908435122689E+00        -9.227              -4.83E-10
              11        1.000     -0.31670278034989E+00        -8.618               1.16E-09
              12        1.000     -0.20936675408791E+00        -5.697               1.63E-09
              13        0.000     -0.62309423244762E-01        -1.696
              14        0.000     -0.12915434712586E-01        -0.351
              15        0.000      0.28257285559049E-01         0.769
              16        0.000      0.40463645696224E-01         1.101
              17        0.000      0.49627368931714E-01         1.350
              18        0.000      0.75348012977293E-01         2.050
              19        0.000      0.83949251964623E-01         2.284
              20        0.000      0.85754204032988E-01         2.333
              21        0.000      0.11737856408676E+00         3.194
              22        0.000      0.15408306641462E+00         4.193
  
 HOMO :       12 A                -0.20936675408791E+00
 LUMO :       13 A                -0.62309423244762E-01
  


                                   ***** SPIN 2 *****

 Scaled ZORA Orbital Energies, per Irrep and Spin:
 =================================================
                        Occup              E (au)              E (eV)       Diff (eV) with prev. cycle
                        -----      --------------------        ------       --------------------------
 A
               3        1.000     -0.64761158244908E+00       -17.622              -7.23E-10
               4        1.000     -0.48235202875234E+00       -13.125              -2.62E-10
               5        1.000     -0.41828854187192E+00       -11.382              -4.57E-10
               6        1.000     -0.41483975112757E+00       -11.288              -3.29E-10
               7        1.000     -0.40508744612677E+00       -11.023               4.67E-10
               8        1.000     -0.36276074442265E+00        -9.871              -6.89E-10
               9        1.000     -0.35241265380567E+00        -9.590               6.30E-10
              10        1.000     -0.33908435122688E+00        -9.227              -4.83E-10
              11        1.000     -0.31670278034989E+00        -8.618               1.16E-09
              12        1.000     -0.20936675408791E+00        -5.697               1.63E-09
              13        0.000     -0.62309423244771E-01        -1.696
              14        0.000     -0.12915434712597E-01        -0.351
              15        0.000      0.28257285559075E-01         0.769
              16        0.000      0.40463645696232E-01         1.101
              17        0.000      0.49627368931715E-01         1.350
              18        0.000      0.75348012977314E-01         2.050
              19        0.000      0.83949251964614E-01         2.284
              20        0.000      0.85754204033008E-01         2.333
              21        0.000      0.11737856408676E+00         3.194
              22        0.000      0.15408306641461E+00         4.193
  
 HOMO :       12 A                -0.20936675408791E+00
 LUMO :       13 A                -0.62309423244771E-01
  


 Orbital Energies, both Spins
 ========================================

 Irrep        no.  (spin)   Occup              E (au)                E (eV)
 ---------------------------------------------------------------------------
 A             1     A       1.00       -0.95528581091649E+00       -25.9946
 A             1      B      1.00       -0.95528581091649E+00       -25.9946
 A             2     A       1.00       -0.70385272426917E+00       -19.1528
 A             2      B      1.00       -0.70385272426917E+00       -19.1528
 A             3     A       1.00       -0.64761158244908E+00       -17.6224
 A             3      B      1.00       -0.64761158244908E+00       -17.6224
 A             4     A       1.00       -0.48235202875234E+00       -13.1255
 A             4      B      1.00       -0.48235202875234E+00       -13.1255
 A             5     A       1.00       -0.41828854187192E+00       -11.3822
 A             5      B      1.00       -0.41828854187192E+00       -11.3822
 A             6     A       1.00       -0.41483975112757E+00       -11.2884
 A             6      B      1.00       -0.41483975112757E+00       -11.2884
 A             7     A       1.00       -0.40508744612677E+00       -11.0230
 A             7      B      1.00       -0.40508744612677E+00       -11.0230
 A             8     A       1.00       -0.36276074442265E+00        -9.8712
 A             8      B      1.00       -0.36276074442265E+00        -9.8712
 A             9     A       1.00       -0.35241265380567E+00        -9.5896
 A             9      B      1.00       -0.35241265380567E+00        -9.5896
 A            10     A       1.00       -0.33908435122689E+00        -9.2270
 A            10      B      1.00       -0.33908435122688E+00        -9.2270
 A            11     A       1.00       -0.31670278034989E+00        -8.6179
 A            11      B      1.00       -0.31670278034989E+00        -8.6179
 A            12     A       1.00       -0.20936675408791E+00        -5.6972
 A            12      B      1.00       -0.20936675408791E+00        -5.6972
 A            13     A       0.00       -0.62309423244762E-01        -1.6955
 A            13      B      0.00       -0.62309423244771E-01        -1.6955
 A            14     A       0.00       -0.12915434712586E-01        -0.3514
 A            14      B      0.00       -0.12915434712597E-01        -0.3514
 A            15     A       0.00        0.28257285559049E-01         0.7689
 A            15      B      0.00        0.28257285559075E-01         0.7689
 A            16     A       0.00        0.40463645696224E-01         1.1011
 A            16      B      0.00        0.40463645696232E-01         1.1011
 A            17     A       0.00        0.49627368931714E-01         1.3504
 A            17      B      0.00        0.49627368931715E-01         1.3504
 A            18     A       0.00        0.75348012977293E-01         2.0503
 A            18      B      0.00        0.75348012977314E-01         2.0503
 A            19     A       0.00        0.83949251964623E-01         2.2844
 A            19      B      0.00        0.83949251964614E-01         2.2844
 A            20     A       0.00        0.85754204032988E-01         2.3335
 A            20      B      0.00        0.85754204033008E-01         2.3335
 A            21     A       0.00        0.11737856408676E+00         3.1940
 A            21      B      0.00        0.11737856408676E+00         3.1940
 A            22     A       0.00        0.15408306641462E+00         4.1928
 A            22      B      0.00        0.15408306641461E+00         4.1928
 A            23     A       0.00        0.15958476773182E+00         4.3425
 A            23      B      0.00        0.15958476773182E+00         4.3425
 A            24     A       0.00        0.15995824811088E+00         4.3527
 A            24      B      0.00        0.15995824811088E+00         4.3527
 A            25     A       0.00        0.18083695870100E+00         4.9208
 A            25      B      0.00        0.18083695870101E+00         4.9208
 A            26     A       0.00        0.24956576399743E+00         6.7910
 A            26      B      0.00        0.24956576399742E+00         6.7910
 A            27     A       0.00        0.25742545803855E+00         7.0049
 A            27      B      0.00        0.25742545803856E+00         7.0049
 A            28     A       0.00        0.27084417378948E+00         7.3700
 A            28      B      0.00        0.27084417378948E+00         7.3700
 A            29     A       0.00        0.30677363312215E+00         8.3477
 A            29      B      0.00        0.30677363312215E+00         8.3477
 A            30     A       0.00        0.31328429062464E+00         8.5249
 A            30      B      0.00        0.31328429062463E+00         8.5249
 A            31     A       0.00        0.35873389491527E+00         9.7616
 A            31      B      0.00        0.35873389491525E+00         9.7616
 A            32     A       0.00        0.36331420051640E+00         9.8863
 A            32      B      0.00        0.36331420051641E+00         9.8863
 A            33     A       0.00        0.39985383925718E+00        10.8806
 A            33      B      0.00        0.39985383925717E+00        10.8806
 A            34     A       0.00        0.40601613753295E+00        11.0483
 A            34      B      0.00        0.40601613753300E+00        11.0483
 A            35     A       0.00        0.41428841001163E+00        11.2734
 A            35      B      0.00        0.41428841001171E+00        11.2734
 A            36     A       0.00        0.42938505979537E+00        11.6842
 A            36      B      0.00        0.42938505979534E+00        11.6842
 A            37     A       0.00        0.44741673513908E+00        12.1748
 A            37      B      0.00        0.44741673513903E+00        12.1748
 A            38     A       0.00        0.49059734588442E+00        13.3498
 A            38      B      0.00        0.49059734588443E+00        13.3498
 A            39     A       0.00        0.49957679051774E+00        13.5942
 A            39      B      0.00        0.49957679051772E+00        13.5942
 A            40     A       0.00        0.57691545215983E+00        15.6987
 A            40      B      0.00        0.57691545215982E+00        15.6987
 A            41     A       0.00        0.67061098221100E+00        18.2483
 A            41      B      0.00        0.67061098221101E+00        18.2483
 A            42     A       0.00        0.68196032721565E+00        18.5571
 A            42      B      0.00        0.68196032721563E+00        18.5571
 A            43     A       0.00        0.70677802325518E+00        19.2324
 A            43      B      0.00        0.70677802325517E+00        19.2324
 A            44     A       0.00        0.79605614501738E+00        21.6618
 A            44      B      0.00        0.79605614501739E+00        21.6618
 A            45     A       0.00        0.83139124193168E+00        22.6233
 A            45      B      0.00        0.83139124193167E+00        22.6233
 A            46     A       0.00        0.83548576851602E+00        22.7347
 A            46      B      0.00        0.83548576851604E+00        22.7347
 A            47     A       0.00        0.84110447635079E+00        22.8876
 A            47      B      0.00        0.84110447635078E+00        22.8876
 A            48     A       0.00        0.95162061619783E+00        25.8949
 A            48      B      0.00        0.95162061619783E+00        25.8949
 A            49     A       0.00        0.95608150069803E+00        26.0163
 A            49      B      0.00        0.95608150069801E+00        26.0163
 A            50     A       0.00        0.10090157725808E+01        27.4567
 A            50      B      0.00        0.10090157725808E+01        27.4567
 A            51     A       0.00        0.10181590100300E+01        27.7055
 A            51      B      0.00        0.10181590100300E+01        27.7055
 A            52     A       0.00        0.10419292727414E+01        28.3523
 A            52      B      0.00        0.10419292727414E+01        28.3523
 A            53     A       0.00        0.10689082887540E+01        29.0865
 A            53      B      0.00        0.10689082887540E+01        29.0865
 A            54     A       0.00        0.10769000004488E+01        29.3039
 A            54      B      0.00        0.10769000004488E+01        29.3039
 A            55     A       0.00        0.10870749447642E+01        29.5808
 A            55      B      0.00        0.10870749447642E+01        29.5808
 A            56     A       0.00        0.11274466164379E+01        30.6794
 A            56      B      0.00        0.11274466164378E+01        30.6794
 A            57     A       0.00        0.11587980956943E+01        31.5325
 A            57      B      0.00        0.11587980956943E+01        31.5325
 A            58     A       0.00        0.12664316636981E+01        34.4614
 A            58      B      0.00        0.12664316636982E+01        34.4614
 A            59     A       0.00        0.12840125250595E+01        34.9398
 A            59      B      0.00        0.12840125250595E+01        34.9398
 A            60     A       0.00        0.12877156235786E+01        35.0405
 A            60      B      0.00        0.12877156235785E+01        35.0405
 A            61     A       0.00        0.12953197357643E+01        35.2474
 A            61      B      0.00        0.12953197357643E+01        35.2474
 A            62     A       0.00        0.13667599613123E+01        37.1914
 A            62      B      0.00        0.13667599613123E+01        37.1914
 A            63     A       0.00        0.14360040479205E+01        39.0757
 A            63      B      0.00        0.14360040479205E+01        39.0757
 A            64     A       0.00        0.14649282038802E+01        39.8627
 A            64      B      0.00        0.14649282038802E+01        39.8627
 A            65     A       0.00        0.15537822645213E+01        42.2806
 A            65      B      0.00        0.15537822645213E+01        42.2806
 A            66     A       0.00        0.15899745387113E+01        43.2654
 A            66      B      0.00        0.15899745387113E+01        43.2654
 A            67     A       0.00        0.16423916956492E+01        44.6918
 A            67      B      0.00        0.16423916956492E+01        44.6918
 A            68     A       0.00        0.16769318252348E+01        45.6316
 A            68      B      0.00        0.16769318252349E+01        45.6316
 A            69     A       0.00        0.17402940273920E+01        47.3558
 A            69      B      0.00        0.17402940273920E+01        47.3558
 A            70     A       0.00        0.17547692839730E+01        47.7497
 A            70      B      0.00        0.17547692839730E+01        47.7497
 A            71     A       0.00        0.17648166025484E+01        48.0231
 A            71      B      0.00        0.17648166025484E+01        48.0231
 A            72     A       0.00        0.17957642122712E+01        48.8652
 A            72      B      0.00        0.17957642122712E+01        48.8652
 A            73     A       0.00        0.18952040054175E+01        51.5711
 A            73      B      0.00        0.18952040054174E+01        51.5711
 A            74     A       0.00        0.19100831142272E+01        51.9760
 A            74      B      0.00        0.19100831142272E+01        51.9760
 A            75     A       0.00        0.19216224440544E+01        52.2900
 A            75      B      0.00        0.19216224440544E+01        52.2900
 A            76     A       0.00        0.19748771586435E+01        53.7391
 A            76      B      0.00        0.19748771586435E+01        53.7391
 A            77     A       0.00        0.20074636776871E+01        54.6259
 A            77      B      0.00        0.20074636776871E+01        54.6259
 A            78     A       0.00        0.20258473455112E+01        55.1261
 A            78      B      0.00        0.20258473455112E+01        55.1261
 A            79     A       0.00        0.21580513857657E+01        58.7236
 A            79      B      0.00        0.21580513857657E+01        58.7236
 A            80     A       0.00        0.21669414676593E+01        58.9655
 A            80      B      0.00        0.21669414676593E+01        58.9655
 A            81     A       0.00        0.22330963767698E+01        60.7656
 A            81      B      0.00        0.22330963767698E+01        60.7656
 A            82     A       0.00        0.23162846425749E+01        63.0293
 A            82      B      0.00        0.23162846425749E+01        63.0293
 A            83     A       0.00        0.23247730320121E+01        63.2603
 A            83      B      0.00        0.23247730320121E+01        63.2603
 A            84     A       0.00        0.23824123110830E+01        64.8287
 A            84      B      0.00        0.23824123110830E+01        64.8287
 A            85     A       0.00        0.24422332728021E+01        66.4565
 A            85      B      0.00        0.24422332728021E+01        66.4565
 A            86     A       0.00        0.24495803163528E+01        66.6565
 A            86      B      0.00        0.24495803163527E+01        66.6565
 A            87     A       0.00        0.25475831023361E+01        69.3233
 A            87      B      0.00        0.25475831023361E+01        69.3233
 A            88     A       0.00        0.26320729457336E+01        71.6223
 A            88      B      0.00        0.26320729457336E+01        71.6223
 A            89     A       0.00        0.27644915032314E+01        75.2256
 A            89      B      0.00        0.27644915032314E+01        75.2256
 A            90     A       0.00        0.27676361372747E+01        75.3112
 A            90      B      0.00        0.27676361372747E+01        75.3112
 A            91     A       0.00        0.28026973819103E+01        76.2653
 A            91      B      0.00        0.28026973819103E+01        76.2653
 A            92     A       0.00        0.28292032621158E+01        76.9865
 A            92      B      0.00        0.28292032621158E+01        76.9865
 A            93     A       0.00        0.28343110656838E+01        77.1255
 A            93      B      0.00        0.28343110656838E+01        77.1255
 A            94     A       0.00        0.28554933134703E+01        77.7019
 A            94      B      0.00        0.28554933134702E+01        77.7019
 A            95     A       0.00        0.28663275778276E+01        77.9967
 A            95      B      0.00        0.28663275778276E+01        77.9967
 A            96     A       0.00        0.29125605178685E+01        79.2548
 A            96      B      0.00        0.29125605178685E+01        79.2548
 A            97     A       0.00        0.29342565102648E+01        79.8452
 A            97      B      0.00        0.29342565102648E+01        79.8452
 A            98     A       0.00        0.29666255910602E+01        80.7260
 A            98      B      0.00        0.29666255910602E+01        80.7260
 A            99     A       0.00        0.29904127556964E+01        81.3733
 A            99      B      0.00        0.29904127556964E+01        81.3733
 A           100     A       0.00        0.30423900458454E+01        82.7876
 A           100      B      0.00        0.30423900458454E+01        82.7876
 A           101     A       0.00        0.30642756651472E+01        83.3832
 A           101      B      0.00        0.30642756651472E+01        83.3832
 A           102     A       0.00        0.32747580088629E+01        89.1107
 A           102      B      0.00        0.32747580088629E+01        89.1107
 A           103     A       0.00        0.32915714176880E+01        89.5682
 A           103      B      0.00        0.32915714176880E+01        89.5682
 A           104     A       0.00        0.33457314997294E+01        91.0420
 A           104      B      0.00        0.33457314997294E+01        91.0420
 A           105     A       0.00        0.33659229835278E+01        91.5914
 A           105      B      0.00        0.33659229835279E+01        91.5914
 A           106     A       0.00        0.33936402867364E+01        92.3457
 A           106      B      0.00        0.33936402867364E+01        92.3457
 A           107     A       0.00        0.34197252416582E+01        93.0555
 A           107      B      0.00        0.34197252416582E+01        93.0555
 A           108     A       0.00        0.34353915889606E+01        93.4818
 A           108      B      0.00        0.34353915889606E+01        93.4818
 A           109     A       0.00        0.34525263962707E+01        93.9480
 A           109      B      0.00        0.34525263962707E+01        93.9480
 A           110     A       0.00        0.34532878438412E+01        93.9687
 A           110      B      0.00        0.34532878438412E+01        93.9687
 A           111     A       0.00        0.35278530690793E+01        95.9978
 A           111      B      0.00        0.35278530690793E+01        95.9978
 A           112     A       0.00        0.35680371321435E+01        97.0912
 A           112      B      0.00        0.35680371321435E+01        97.0912
 A           113     A       0.00        0.35703566504232E+01        97.1543
 A           113      B      0.00        0.35703566504232E+01        97.1543
 A           114     A       0.00        0.37653869218384E+01       102.4614
 A           114      B      0.00        0.37653869218384E+01       102.4614
 A           115     A       0.00        0.37744687267802E+01       102.7085
 A           115      B      0.00        0.37744687267802E+01       102.7085
 A           116     A       0.00        0.38903943071992E+01       105.8630
 A           116      B      0.00        0.38903943071992E+01       105.8630
 A           117     A       0.00        0.39547691636400E+01       107.6147
 A           117      B      0.00        0.39547691636400E+01       107.6147
 A           118     A       0.00        0.40048654765144E+01       108.9779
 A           118      B      0.00        0.40048654765144E+01       108.9779
 A           119     A       0.00        0.40988033649344E+01       111.5341
 A           119      B      0.00        0.40988033649344E+01       111.5341
 A           120     A       0.00        0.41110002231966E+01       111.8660
 A           120      B      0.00        0.41110002231966E+01       111.8660
 A           121     A       0.00        0.42315606969517E+01       115.1466
 A           121      B      0.00        0.42315606969517E+01       115.1466
 A           122     A       0.00        0.42528025377150E+01       115.7246
 A           122      B      0.00        0.42528025377150E+01       115.7246
 A           123     A       0.00        0.44604178229506E+01       121.3741
 A           123      B      0.00        0.44604178229506E+01       121.3741
 A           124     A       0.00        0.44699478721421E+01       121.6335
 A           124      B      0.00        0.44699478721421E+01       121.6335
 A           125     A       0.00        0.44712473976391E+01       121.6688
 A           125      B      0.00        0.44712473976391E+01       121.6688
 A           126     A       0.00        0.45790087909456E+01       124.6012
 A           126      B      0.00        0.45790087909456E+01       124.6012
 A           127     A       0.00        0.46070453011324E+01       125.3641
 A           127      B      0.00        0.46070453011324E+01       125.3641
 A           128     A       0.00        0.46406004592970E+01       126.2772
 A           128      B      0.00        0.46406004592970E+01       126.2772
 A           129     A       0.00        0.47182949999085E+01       128.3913
 A           129      B      0.00        0.47182949999085E+01       128.3913
 A           130     A       0.00        0.47704803755703E+01       129.8114
 A           130      B      0.00        0.47704803755703E+01       129.8114
 A           131     A       0.00        0.48506110704670E+01       131.9918
 A           131      B      0.00        0.48506110704670E+01       131.9918
 A           132     A       0.00        0.48987116775505E+01       133.3007
 A           132      B      0.00        0.48987116775505E+01       133.3007
 A           133     A       0.00        0.49596356200463E+01       134.9586
 A           133      B      0.00        0.49596356200463E+01       134.9586
 A           134     A       0.00        0.49658027885826E+01       135.1264
 A           134      B      0.00        0.49658027885826E+01       135.1264
 A           135     A       0.00        0.51519383484438E+01       140.1914
 A           135      B      0.00        0.51519383484438E+01       140.1914
 A           136     A       0.00        0.53264438214800E+01       144.9399
 A           136      B      0.00        0.53264438214800E+01       144.9399
 A           137     A       0.00        0.54492264908326E+01       148.2810
 A           137      B      0.00        0.54492264908326E+01       148.2810
 A           138     A       0.00        0.54642714921205E+01       148.6904
 A           138      B      0.00        0.54642714921205E+01       148.6904
 A           139     A       0.00        0.54738149108004E+01       148.9501
 A           139      B      0.00        0.54738149108004E+01       148.9501
 A           140     A       0.00        0.57849813504453E+01       157.4174
 A           140      B      0.00        0.57849813504453E+01       157.4174
 A           141     A       0.00        0.58139308377742E+01       158.2051
 A           141      B      0.00        0.58139308377742E+01       158.2051
 A           142     A       0.00        0.62232306127717E+01       169.3427
 A           142      B      0.00        0.62232306127717E+01       169.3427
 A           143     A       0.00        0.63308559352737E+01       172.2714
 A           143      B      0.00        0.63308559352737E+01       172.2714
 A           144     A       0.00        0.63449962715103E+01       172.6561
 A           144      B      0.00        0.63449962715103E+01       172.6561
 A           145     A       0.00        0.64012591401422E+01       174.1871
 A           145      B      0.00        0.64012591401422E+01       174.1871
 A           146     A       0.00        0.64335885023317E+01       175.0669
 A           146      B      0.00        0.64335885023317E+01       175.0669
 A           147     A       0.00        0.64675482666039E+01       175.9909
 A           147      B      0.00        0.64675482666039E+01       175.9909
 A           148     A       0.00        0.65536633875033E+01       178.3343
 A           148      B      0.00        0.65536633875033E+01       178.3343
 A           149     A       0.00        0.66124328070184E+01       179.9335
 A           149      B      0.00        0.66124328070184E+01       179.9335
 A           150     A       0.00        0.66606207682876E+01       181.2447
 A           150      B      0.00        0.66606207682876E+01       181.2447
 A           151     A       0.00        0.70120756016982E+01       190.8083
 A           151      B      0.00        0.70120756016983E+01       190.8083
 A           152     A       0.00        0.71933586844059E+01       195.7412
 A           152      B      0.00        0.71933586844059E+01       195.7412
 A           153     A       0.00        0.72124303890740E+01       196.2602
 A           153      B      0.00        0.72124303890740E+01       196.2602
 A           154     A       0.00        0.73796944206488E+01       200.8117
 A           154      B      0.00        0.73796944206488E+01       200.8117
 A           155     A       0.00        0.75795836125515E+01       206.2510
 A           155      B      0.00        0.75795836125516E+01       206.2510
 A           156     A       0.00        0.75801090778429E+01       206.2653
 A           156      B      0.00        0.75801090778429E+01       206.2653
 A           157     A       0.00        0.79321673657210E+01       215.8453
 A           157      B      0.00        0.79321673657211E+01       215.8453
 A           158     A       0.00        0.80670271380734E+01       219.5150
 A           158      B      0.00        0.80670271380734E+01       219.5150
 A           159     A       0.00        0.12755793115349E+02       347.1028
 A           159      B      0.00        0.12755793115349E+02       347.1028
 A           160     A       0.00        0.14565519952166E+02       396.3480
 A           160      B      0.00        0.14565519952166E+02       396.3480
 A           161     A       0.00        0.14935000694235E+02       406.4020
 A           161      B      0.00        0.14935000694235E+02       406.4020
 A           162     A       0.00        0.33746553126534E+02       918.2904
 A           162      B      0.00        0.33746553126534E+02       918.2904
  
 Spin polar: 0 (Spin_A minus Spin_B electrons)


 Scaled ZORA Orbital Energies of the Core Orbitals:
 ==================================================

 (Note that the atoms are grouped by atomtype, see the labels, and may hence NOT be in input order)

 AtomType  Orbital  Atom                   E (au)                        E (eV)
 --------  -------  ----           --------------------        ----------------
 C           1S        1          -0.99939432903692E+01                -271.949
                       2          -0.99103631831806E+01                -269.675
                       3          -0.99103632206302E+01                -269.675
 O           1S        4          -0.18767890426992E+02                -510.700


 Fit test: (difference of exact and fit density, squared integrated, result summed over spins)
         Sum-of-Fragments:                             0.00000000000606
         Orthogonalized Fragments:                     0.00000589078621
         SCF:                                          0.00001083238189


 ==========================
 Electron Density at Nuclei
 ==========================
  
 The electron density is calculated at points on a small sphere around the center of a nucleus.
 The printed electron density is the average electron density on these points.
 The radius of the sphere is the printed approximate finite nuclear radius.
 Note: ZORA-4 density is used, which includes small component density

         Atom        Nuclear Radius (Angstrom)             Electron Density (a.u.)
         ----        -------------------------             -----------------------
     1)   C                 0.0000320678                              126.54410
     2)   C                 0.0000320678                              126.31305
     3)   C                 0.0000320678                              126.31305
     4)   O                 0.0000345546                              315.75958
     5)   H                 0.0000181514                                0.48889
     6)   H                 0.0000181514                                0.49349
     7)   H                 0.0000181514                                0.48889
     8)   H                 0.0000181514                                0.48889
     9)   H                 0.0000181514                                0.48889
    10)   H                 0.0000181514                                0.49349


 =======================================
 M U L L I K E N   P O P U L A T I O N S
 =======================================
  
 The survey below gives for each atom:
 a) the total charge (Z minus electrons)
 b) the net spin polarization (nr of electrons spin-A minus spin-B)
 c) for each spin the atomic electron valence density (integrated) per L-value.

 Atom              Charge    Spin density          S         P         D         F
 ----              ------    ------------       ------    ------    ------    ------
 1 C               0.5966         -0.0000   A:  0.5316    1.1006    0.0654    0.0042
                                            B:  0.5316    1.1006    0.0654    0.0042
 2 C               0.3867          0.0000   A:  0.5080    1.2801    0.0176    0.0010
                                            B:  0.5080    1.2801    0.0176    0.0010
 3 C               0.3867          0.0000   A:  0.5080    1.2801    0.0176    0.0010
                                            B:  0.5080    1.2801    0.0176    0.0010
 4 O              -0.5469          0.0000   A:  0.9397    2.3023    0.0285    0.0031
                                            B:  0.9397    2.3023    0.0285    0.0031
 5 H              -0.1348         -0.0000   A:  0.5232    0.0411    0.0031    0.0000
                                            B:  0.5232    0.0411    0.0031    0.0000
 6 H              -0.1420         -0.0000   A:  0.5316    0.0364    0.0030    0.0000
                                            B:  0.5316    0.0364    0.0030    0.0000
 7 H              -0.1348         -0.0000   A:  0.5232    0.0411    0.0031    0.0000
                                            B:  0.5232    0.0411    0.0031    0.0000
 8 H              -0.1348         -0.0000   A:  0.5232    0.0411    0.0031    0.0000
                                            B:  0.5232    0.0411    0.0031    0.0000
 9 H              -0.1348         -0.0000   A:  0.5232    0.0411    0.0031    0.0000
                                            B:  0.5232    0.0411    0.0031    0.0000
 10 H             -0.1420          0.0000   A:  0.5316    0.0364    0.0030    0.0000
                                            B:  0.5316    0.0364    0.0030    0.0000

 Populations of individual BAS functions
 ----------------------------------------
 1 C            0.0003  0.1518  0.3961 -0.0166 -0.1762  0.0217 -0.0301  0.4374  0.2786  0.3120
                0.0916  0.0589  0.1066  0.0105  0.0048  0.0307 -0.0077  0.0122  0.0148  0.0011
                0.0006 -0.0001 -0.0017  0.0003  0.0023 -0.0026 -0.0030  0.0031  0.0042
         B:     0.0003  0.1518  0.3961 -0.0166 -0.1762  0.0217 -0.0301  0.4374  0.2786  0.3120
                0.0916  0.0589  0.1066  0.0105  0.0048  0.0307 -0.0077  0.0122  0.0148  0.0011
                0.0006 -0.0001 -0.0017  0.0003  0.0023 -0.0026 -0.0030  0.0031  0.0042
 2 C            0.0003  0.1319  0.3923 -0.0165 -0.0676 -0.0681 -0.0578  0.3915  0.4022  0.4010
                0.0911  0.0929  0.0949  0.0049  0.0012  0.0054  0.0008  0.0045  0.0008  0.0010
                0.0001  0.0014 -0.0010  0.0001  0.0002 -0.0006  0.0004  0.0006 -0.0012
         B:     0.0003  0.1319  0.3923 -0.0165 -0.0676 -0.0681 -0.0578  0.3915  0.4022  0.4010
                0.0911  0.0929  0.0949  0.0049  0.0012  0.0054  0.0008  0.0045  0.0008  0.0010
                0.0001  0.0014 -0.0010  0.0001  0.0002 -0.0006  0.0004  0.0006 -0.0012
 3 C            0.0003  0.1319  0.3923 -0.0165 -0.0676 -0.0681 -0.0578  0.3915  0.4022  0.4010
                0.0911  0.0929  0.0949  0.0049  0.0012  0.0054  0.0008  0.0045  0.0008  0.0010
                0.0001  0.0014 -0.0010  0.0001  0.0002 -0.0006  0.0004  0.0006 -0.0012
         B:     0.0003  0.1319  0.3923 -0.0165 -0.0676 -0.0681 -0.0578  0.3915  0.4022  0.4010
                0.0911  0.0929  0.0949  0.0049  0.0012  0.0054  0.0008  0.0045  0.0008  0.0010
                0.0001  0.0014 -0.0010  0.0001  0.0002 -0.0006  0.0004  0.0006 -0.0012
 4 O            0.0002  0.4661  0.4815 -0.0082  0.2795  0.1806  0.1398  0.4846  0.3761  0.4287
                0.1676  0.1126  0.1326 -0.0059  0.0001  0.0074 -0.0012  0.0103  0.0178 -0.0056
               -0.0023 -0.0057  0.0000  0.0000  0.0066 -0.0028 -0.0040  0.0062  0.0106
         B:     0.0002  0.4661  0.4815 -0.0082  0.2795  0.1806  0.1398  0.4846  0.3761  0.4287
                0.1676  0.1126  0.1326 -0.0059  0.0001  0.0074 -0.0012  0.0103  0.0178 -0.0056
               -0.0023 -0.0057  0.0000  0.0000  0.0066 -0.0028 -0.0040  0.0062  0.0106
 5 H            0.0470  0.3238  0.1523  0.0119  0.0151  0.0142 -0.0027  0.0006  0.0004  0.0035
                0.0008  0.0006
         B:     0.0470  0.3238  0.1523  0.0119  0.0151  0.0142 -0.0027  0.0006  0.0004  0.0035
                0.0008  0.0006
 6 H            0.0630  0.3136  0.1550  0.0123  0.0108  0.0134  0.0034  0.0006  0.0008 -0.0031
                0.0004  0.0009
         B:     0.0630  0.3136  0.1550  0.0123  0.0108  0.0134  0.0034  0.0006  0.0008 -0.0031
                0.0004  0.0009
 7 H            0.0470  0.3238  0.1523  0.0119  0.0151  0.0142 -0.0027  0.0006  0.0004  0.0035
                0.0008  0.0006
         B:     0.0470  0.3238  0.1523  0.0119  0.0151  0.0142 -0.0027  0.0006  0.0004  0.0035
                0.0008  0.0006
 8 H            0.0470  0.3238  0.1523  0.0119  0.0151  0.0142 -0.0027  0.0006  0.0004  0.0035
                0.0008  0.0006
         B:     0.0470  0.3238  0.1523  0.0119  0.0151  0.0142 -0.0027  0.0006  0.0004  0.0035
                0.0008  0.0006
 9 H            0.0470  0.3238  0.1523  0.0119  0.0151  0.0142 -0.0027  0.0006  0.0004  0.0035
                0.0008  0.0006
         B:     0.0470  0.3238  0.1523  0.0119  0.0151  0.0142 -0.0027  0.0006  0.0004  0.0035
                0.0008  0.0006
 10 H           0.0630  0.3136  0.1550  0.0123  0.0108  0.0134  0.0034  0.0006  0.0008 -0.0031
                0.0004  0.0009
         B:     0.0630  0.3136  0.1550  0.0123  0.0108  0.0134  0.0034  0.0006  0.0008 -0.0031
                0.0004  0.0009

 Gross Charges per Atom (Z minus electrons)
 ==========================================
             0.5966    0.3867    0.3867   -0.5469   -0.1348   -0.1420   -0.1348   -0.1348   -0.1348   -0.1420
 Net Total:  0.00000000


 Atom-Atom Population Matrix (off-diagonal elements not doubled)
 ===============================================================


                                   ***** SPIN 1 *****

     1 :     1.1976
     2 :     0.1813    1.1463
     3 :     0.1813   -0.0646    1.1463
     4 :     0.2613   -0.0309   -0.0309    3.0758
     5 :    -0.0197   -0.0060    0.1975    0.0007    0.4496
     6 :    -0.0205   -0.0016    0.1932   -0.0023   -0.0242    0.4531
     7 :    -0.0197   -0.0060    0.1975    0.0007   -0.0242   -0.0242    0.4496
     8 :    -0.0197    0.1975   -0.0060    0.0007   -0.0051    0.0006   -0.0019    0.4496
     9 :    -0.0197    0.1975   -0.0060    0.0007   -0.0019    0.0006   -0.0051   -0.0242    0.4496
    10 :    -0.0205    0.1932   -0.0016   -0.0023    0.0006   -0.0037    0.0006   -0.0242   -0.0242    0.4531

                                   ***** SPIN 2 *****

     1 :     1.1976
     2 :     0.1813    1.1463
     3 :     0.1813   -0.0646    1.1463
     4 :     0.2613   -0.0309   -0.0309    3.0758
     5 :    -0.0197   -0.0060    0.1975    0.0007    0.4496
     6 :    -0.0205   -0.0016    0.1932   -0.0023   -0.0242    0.4531
     7 :    -0.0197   -0.0060    0.1975    0.0007   -0.0242   -0.0242    0.4496
     8 :    -0.0197    0.1975   -0.0060    0.0007   -0.0051    0.0006   -0.0019    0.4496
     9 :    -0.0197    0.1975   -0.0060    0.0007   -0.0019    0.0006   -0.0051   -0.0242    0.4496
    10 :    -0.0205    0.1932   -0.0016   -0.0023    0.0006   -0.0037    0.0006   -0.0242   -0.0242    0.4531


 =================================================
 H I R S H F E L D   C H A R G E   A N A L Y S I S
 =================================================
  
 For each fragment: the (numerical) integral of rho(scf) * rho(fragment)/rho(sum-of-fragments)
 (nuclear charges are included, electrons are counted negative)

 The fragments and their ordering are defined in the early G E O M E T R Y output section.
 If you use single-atom fragments, this usually implies that all atoms of the same
 chemical type are grouped together. This may not be the order in which you listed them
 in the input file!

    1  C                         0.1556
    2  C                        -0.1176
    3  C                        -0.1176
    4  O                        -0.2353
    5  H                         0.0533
    6  H                         0.0508
    7  H                         0.0533
    8  H                         0.0533
    9  H                         0.0533
   10  H                         0.0508

 Sum of these charges (accuracy NumInt/Tails) =           0.00001887


 =============================
 V O R O N O I   C H A R G E S
 =============================
  
 For each atom: the (numerical) integral of the total electronic charge density in its Voronoi cell,
 i.e. the region of space that is closer to that atom than to any other atom.
 (cf. Wigner-Seitz cells in crystals)

 Within the Voronoi cell the subintegrals over the atomic sphere and the remaining part are evaluated
 separately to give the numbers of electrons (negative charge) in these regions.
 The net total charge in the cell (including the nuclear charge) is also given.

 Values are provided for
    a) the Initial (sum-of-fragments) density
    b) the Orthogonalized-Fragments density
    c) the SCF density
    d) the Voronoi Deformation Density (VDD): the difference SCF-Initial for the complete atomic cell
 ---------------------------------------------------------------------------------------------------
 Total NetCharge:               0.000                      0.000                      0.000    0.000
 (accuracy NumInt/Tails)

 Remark: the 'NetTotal' Voronoi charges often do not match the Mulliken and/or Hirshfeld charges very
 well. This is caused by the fact that chemically different atoms are not treated in accordance with
 their relative sizes. (Voronoi cells are defined by boundary planes halfway between the atoms.)
 However, the CHANGES in charge, comparing 'Initial' to 'SCF' for instance, do give a fair indication
 of the flow of charge caused by the relaxation from sum-of-fragments to self-consistency.

 Warning: the absolute accuracy of the VDD charges obtained using the Fuzzy Cells (Becke) integration
 scheme is much poorer than the one obtained with an 'equivalent' Voronoi integration grid. 


 =================================================================
 M U L T I P O L E   D E R I V E D   C H A R G E   A N A L Y S I S
 =================================================================

 This charge analysis uses the atomic multipoles (obtained from the fitted density) up to some level X,
 and reconstructs these multipoles exactly (up to level X) by distributing charges over all atoms.
 This is achieved by using Lagrange multipliers and a weight function to keep the multipoles local.

 Dummy atoms can be included (by setting INCDUM in MDC-block to 1) to obtain a fractional charge.
 This is generally useful and necessary only for small symmetrical molecules, when there are not
 enough degrees of freedom to reconstruct the multipoles.

 Since the atomic multipoles are reconstructed up to level X,
 the molecular multipoles are represented also up to level X.
 The recommended level is to reconstruct up to quadrupole : -> MDC-q charges.

 See: M. Swart, P.Th. van Duijnen, J.G. Snijders, J.Comput.Chem., (2001), p. 79-88.

 ------------------------------------------------------------------------ 
 Atomic electronic multipole moments from SCF equations (a.u.) for spin A
 ------------------------------------------------------------------------ 

   atom        charge        dip-x     dip-y     dip-z      quad-xx   quad-xy   quad-xz   quad-yy   quad-yz   quad-zz
 --------------------------------------------------------------------------------------------------------------------
    1 C      0.123519    -0.000000 -0.000000 -0.021824     0.056192  0.000000  0.000000 -0.145616  0.000000  0.089424
    2 C      0.103388    -0.023307  0.000000  0.011840    -0.004240 -0.000000  0.006760 -0.016723 -0.000000  0.020963
    3 C      0.103388     0.023307 -0.000000  0.011840    -0.004240 -0.000000 -0.006760 -0.016724  0.000000  0.020964
    4 O     -0.180140     0.000000  0.000000  0.170191    -0.263342 -0.000000  0.000001 -0.068598  0.000000  0.331940
    5 H     -0.026115     0.000372  0.005376  0.002172    -0.044662  0.002013  0.003088  0.046840  0.049878 -0.002178
    6 H     -0.022847     0.001891  0.000000 -0.008782     0.047692  0.000001 -0.045944 -0.055474 -0.000001  0.007782
    7 H     -0.026115     0.000372 -0.005376  0.002172    -0.044662 -0.002014  0.003088  0.046842 -0.049878 -0.002180
    8 H     -0.026115    -0.000372 -0.005376  0.002172    -0.044662  0.002013 -0.003088  0.046840 -0.049878 -0.002177
    9 H     -0.026115    -0.000372  0.005376  0.002171    -0.044662 -0.002013 -0.003088  0.046843  0.049878 -0.002180
   10 H     -0.022847    -0.001891 -0.000000 -0.008782     0.047693  0.000001  0.045944 -0.055474  0.000001  0.007781

 ------------------------------------------------------------------------ 
 Atomic electronic multipole moments from SCF equations (a.u.) for spin B
 ------------------------------------------------------------------------ 

   atom        charge        dip-x     dip-y     dip-z      quad-xx   quad-xy   quad-xz   quad-yy   quad-yz   quad-zz
 --------------------------------------------------------------------------------------------------------------------
    1 C      0.123519    -0.000000 -0.000000 -0.021824     0.056192  0.000000  0.000000 -0.145616  0.000000  0.089424
    2 C      0.103388    -0.023307  0.000000  0.011840    -0.004240 -0.000000  0.006760 -0.016723 -0.000000  0.020963
    3 C      0.103388     0.023307 -0.000000  0.011840    -0.004240 -0.000000 -0.006760 -0.016724  0.000000  0.020964
    4 O     -0.180140     0.000000  0.000000  0.170191    -0.263342 -0.000000  0.000001 -0.068598  0.000000  0.331940
    5 H     -0.026115     0.000372  0.005376  0.002172    -0.044662  0.002013  0.003088  0.046840  0.049878 -0.002178
    6 H     -0.022847     0.001891  0.000000 -0.008782     0.047692  0.000001 -0.045944 -0.055474 -0.000001  0.007782
    7 H     -0.026115     0.000372 -0.005376  0.002172    -0.044662 -0.002014  0.003088  0.046842 -0.049878 -0.002180
    8 H     -0.026115    -0.000372 -0.005376  0.002172    -0.044662  0.002013 -0.003088  0.046840 -0.049878 -0.002177
    9 H     -0.026115    -0.000372  0.005376  0.002171    -0.044662 -0.002013 -0.003088  0.046843  0.049878 -0.002180
   10 H     -0.022847    -0.001891 -0.000000 -0.008782     0.047693  0.000001  0.045944 -0.055474  0.000001  0.007781

 ----------------------------------------------------- 
 MDC atomic charges (includes spinA + spinB electrons)
 ----------------------------------------------------- 

 The MDC-m charges are just the Monopole terms in the multipole expansion, while for the MDC-d charges
 also the Dipoles are reconstructed. The usually preferred charges are the MDC-q charges.
 These reconstruct the Monopoles, Dipoles and Quadrupoles (both atomic AND molecular).

 Given here are the atomic charges of both spins added. These should be compared
 to the values from a "normal" RESTRICTED calculation.

        Atom    Level:     MDC-m        MDC-d        MDC-q
 ---------------------------------------------------------
     1     C            0.247039     0.302457     0.392824
     2     C            0.206775     0.170672     0.300286
     3     C            0.206775     0.170672     0.300283
     4     O           -0.360280    -0.463493    -0.520800
     5     H           -0.052230    -0.035404    -0.089892
     6     H           -0.045695    -0.019348    -0.056513
     7     H           -0.052230    -0.035403    -0.089890
     8     H           -0.052230    -0.035404    -0.089892
     9     H           -0.052230    -0.035403    -0.089891
    10     H           -0.045695    -0.019348    -0.056514

 -------------------------------- 
 MDC spin density (spinA - spinB)
 -------------------------------- 
 Reported here are the the number of Alpha-electrons minus the number of Beta-electrons
 per atom, which usually are regarded as spin densities.

        Atom    Level:     MDC-m        MDC-d        MDC-q
 ---------------------------------------------------------
     1     C           -0.000000    -0.000000    -0.000000
     2     C            0.000000     0.000000    -0.000000
     3     C           -0.000000     0.000000    -0.000000
     4     O            0.000000     0.000000     0.000000
     5     H           -0.000000    -0.000000     0.000000
     6     H            0.000000    -0.000000     0.000000
     7     H           -0.000000    -0.000000     0.000000
     8     H           -0.000000    -0.000000     0.000000
     9     H           -0.000000    -0.000000    -0.000000
    10     H            0.000000     0.000000     0.000000

 --------------------------------------------- 
 Represented total molecular multipole moments
 --------------------------------------------- 

 Given here are the Molecular multipole moments from the atomic charges, and from the Fit Density.
 Note that the atomic charges represent the latter, NOT the ones from the Exact density.

 Reported here are the Molecular multipole moments of both spins added.
 They should be compared to the values from a "normal" RESTRICTED calculation.

            Q (a.u.)             Dipole moment (Debye)                                          Quadrupole moment (a.u.)
                                 x         y         z              xx        xy        xz        yy        yz        zz
------------------------------------------------------------------------------------------------------------------------
MDC-m         0.0000        0.0000    0.0000    2.1825          2.1972   -0.0000   -0.0000    1.8947   -0.0000   -4.0919
MDC-d         0.0000        0.0000    0.0000    3.0119          3.4543   -0.0000   -0.0000    2.1309   -0.0000   -5.5852
MDC-q        -0.0000        0.0000    0.0000    2.7744          3.2618   -0.0000   -0.0000    2.6339   -0.0000   -5.8957
 
Fit.Dens.     0.0000        0.0000    0.0000    3.0119          3.1143   -0.0000   -0.0000    2.4864   -0.0000   -5.6008


 ==========
 S**2 value  ***  see also R. Bulo et al., J.Am.Chem.Soc., 124 (2002) 13903-13910, note (29)  ***
 ==========
  
                                       exact      expectation value

 Total S2 (S squared)                  0.00000             0.00000


 =============
 Dipole Moment  ***  (Debye)  ***
 =============
  
 Vector   :         0.00000650      0.00000625      3.01220394
 Magnitude:         3.01220394

 This molecular dipole moment is calculated with analytic integration


 =========================================
 Quadrupole Moment (Buckingham convention)  ***  (a.u.)  ***
 =========================================
  
      quad-xx        quad-xy        quad-xz        quad-yy        quad-yz        quad-zz
      3.11468545    -0.00000808    -0.00001256     2.48645834    -0.00001381    -5.60114380

 This molecular quadrupole moment is calculated with analytic integration
1


 =======================================================
 S F O   P O P U L A T I O N S ,   M O   A N A L Y S I S
 =======================================================
  
 A Mulliken population analysis is performed on (input-)selected MOs. All populations refer to SFOs.
 BAS populations may have been printed directly after the SCF part.


                                   ***** SPIN 1 *****


                                       === A ===


 SFO contributions (%) per orbital
 (multiplication by the orbital occupation yields the SFO Gross Populations)

 Orb.:        3      4      5      6      7      8      9     10     11     12     13     14     15     16
 occup:     1.00   1.00   1.00   1.00   1.00   1.00   1.00   1.00   1.00   1.00   0.00   0.00   0.00   0.00
 CF+SFO     ----   ----   ----   ----   ----   ----   ----   ----   ----   ----   ----   ----   ----   ----
 ------
      5:    0.00  21.21   0.00   0.00   0.04  -0.00   0.72   0.00   0.00  -0.00   0.00  -1.42   0.00  -0.00
      6:   -0.00   0.10   0.00  -0.00   0.23   0.00   0.45  -0.00  -0.00   0.00  -0.00  -1.54  -0.00   0.00
      8:    6.43   0.00  -0.00  22.21  -0.00  -0.00  -0.00   5.39  -0.00   0.87   0.00   0.00  -6.63  -0.00
      9:   -6.51   0.00  -0.00   2.53  -0.00  -0.00  -0.00   3.30  -0.00   1.72  -0.00  -0.00 -19.76   0.00
     10:   -0.09   0.00  -0.00  -0.32   0.00  -0.00   0.00  -0.19  -0.00  -0.05  -0.00   0.00   1.33   0.00
     11:   -0.00   0.00  23.57   0.00   0.00   0.00   0.00  -0.00  12.68  -0.00  54.14  -0.00  -0.00   8.31
     12:    0.00   0.00  -1.23   0.00   0.00  -0.00   0.00  -0.00   1.03   0.00  -3.52  -0.00   0.00   7.29
     14:    0.00   2.56   0.00   0.00   7.55   0.00   3.78   0.00   0.00  -0.00   0.00  -0.01   0.00  -0.00
     15:    0.00   0.20   0.00   0.00   1.17  -0.00   6.73   0.00   0.00  -0.00  -0.00  -0.36  -0.00   0.00
     20:    0.25   0.00  -0.00   0.08   0.00   0.00   0.00   0.18   0.00   2.56  -0.00   0.00   0.00   0.00
     21:   -0.00  -0.00   0.01  -0.00  -0.00   0.00   0.00  -0.00   1.20  -0.00   0.81  -0.00  -0.00   0.01
     29:   26.26   2.40   0.00  -0.01   0.08   0.00   0.08  -0.09   0.00   1.25  -0.00   1.05   0.80   0.00
     30:    0.12   0.03  -0.00  -0.02   0.02  -0.00  -0.03  -0.14  -0.00  -0.53  -0.00  -4.75  -1.32  -0.00
     32:   -0.56  10.16   0.00   1.83   8.85  -0.00  -0.03  15.39   0.00   4.89  -0.00   0.05  -0.81   0.00
     33:   -1.20   0.37   0.00   0.13  -0.20  -0.00  -0.03   1.33   0.00   0.10   0.00  -0.10  -9.79  -0.00
     35:    0.00  -0.00  17.16   0.00  -0.00  22.57  -0.00   0.00   3.89   0.00   0.05   0.00   0.00   2.44
     36:    0.00  -0.00  -1.78   0.00  -0.00   0.84   0.00  -0.00   0.43  -0.00  -0.24  -0.00  -0.00 -25.55
     38:    0.11   2.59  -0.00  14.55   7.16   0.00  12.64   3.29   0.00   3.31  -0.00   1.05   0.58   0.00
     39:   -0.00   0.07  -0.00   0.48  -0.02   0.00  -0.73   0.22  -0.00   0.25   0.00  -2.50  -1.04  -0.00
     53:   26.26   2.40  -0.00  -0.01   0.08   0.00   0.08  -0.09  -0.00   1.25  -0.00   1.05   0.79  -0.00
     54:    0.12   0.03   0.00  -0.02   0.02   0.00  -0.03  -0.14   0.00  -0.53   0.00  -4.75  -1.32   0.00
     56:   -0.56  10.15   0.00   1.83   8.85   0.00  -0.03  15.39   0.00   4.89  -0.00   0.05  -0.81   0.00
     57:   -1.20   0.37   0.00   0.13  -0.20   0.00  -0.03   1.33   0.00   0.10   0.00  -0.10  -9.79  -0.00
     59:    0.00   0.00  17.16   0.00   0.00  22.57  -0.00   0.00   3.89   0.00   0.05  -0.00   0.00   2.44
     60:   -0.00  -0.00  -1.78   0.00   0.00   0.84  -0.00   0.00   0.43  -0.00  -0.24   0.00  -0.00 -25.55
     62:    0.11   2.59   0.00  14.55   7.16   0.00  12.64   3.29  -0.00   3.31   0.00   1.05   0.58  -0.00
     63:   -0.00   0.07   0.00   0.48  -0.02  -0.00  -0.73   0.22  -0.00   0.25  -0.00  -2.50  -1.04   0.00
     77:    0.00   8.42  -0.00   0.00   9.27  -0.00   4.76   0.00   0.00   0.00  -0.00   0.04   0.00   0.00
     80:    1.45   0.00  -0.00  15.98   0.00   0.00  -0.00   3.16   0.00  72.90   0.00   0.00   0.50  -0.00
     83:    0.00   0.00  10.56   0.00  -0.00   0.00  -0.00  -0.00  56.61  -0.00  32.71   0.00   0.00   1.01
     84:   -0.00   0.00  -0.28   0.00  -0.00  -0.00  -0.00  -0.00   0.03   0.00  -3.51  -0.00  -0.00  -0.77
     86:    0.00   8.78   0.00   0.00  21.89   0.00  31.20  -0.00   0.00   0.00  -0.00  -0.00   0.00   0.00
    101:    6.60   3.58   8.40   5.13   1.13  12.16   3.71   1.15   4.66   0.67   5.03   9.63   8.06  12.78
    102:    0.06  -0.05   0.16   0.23   0.01   0.55   0.13  -0.03   0.02  -0.01  -0.84  18.79  11.97  17.65
    103:   -0.21   0.05  -0.01  -0.01   0.00   0.04   0.02   0.00   0.01   0.00  -0.19  -0.74  -0.15   1.22
    112:    8.30   5.26  -0.00   0.69  10.11   0.00   5.09  20.36   0.00   0.14   0.00  -1.19   9.54  -0.00
    113:   -0.01   0.02  -0.00  -0.04   0.75   0.00   0.15   0.36   0.00   0.04  -0.00  -0.51  21.93  -0.00
    123:    6.60   3.58   8.41   5.12   1.13  12.16   3.71   1.15   4.66   0.67   5.02   9.63   8.06  12.77
    124:    0.06  -0.05   0.16   0.23   0.01   0.55   0.13  -0.03   0.02  -0.01  -0.84  18.79  11.97  17.66
    125:   -0.21   0.05  -0.01  -0.01   0.00   0.04   0.02   0.00   0.01   0.00  -0.19  -0.74  -0.15   1.22
    134:    6.60   3.58   8.41   5.12   1.13  12.16   3.71   1.15   4.66   0.67   5.02   9.63   8.06  12.77
    135:    0.06  -0.05   0.16   0.23   0.01   0.55   0.13  -0.03   0.02  -0.01  -0.84  18.79  11.97  17.66
    136:   -0.21   0.05  -0.01  -0.01   0.00   0.04   0.02   0.00   0.01   0.00  -0.19  -0.74  -0.15   1.22
    145:    6.61   3.58   8.40   5.12   1.13  12.16   3.71   1.15   4.66   0.67   5.03   9.63   8.06  12.78
    146:    0.06  -0.05   0.16   0.23   0.01   0.55   0.13  -0.03   0.02  -0.01  -0.84  18.79  11.97  17.65
    147:   -0.21   0.05  -0.01  -0.01   0.00   0.04   0.02   0.00   0.01   0.00  -0.19  -0.74  -0.15   1.22
    156:    8.31   5.26   0.00   0.69  10.11   0.00   5.09  20.36  -0.00   0.14  -0.00  -1.19   9.53  -0.00
    157:   -0.01   0.02   0.00  -0.04   0.75   0.00   0.15   0.36  -0.00   0.04   0.00  -0.51  21.93   0.00


 Summation over all MOs, multiplied by occupation: Total SFO Gross Populations in this Irrep
 ===========================================================================================

     0.00    0.00    0.00    0.00    0.53   -0.00    0.00    0.35    0.01   -0.01    0.36   -0.00
    -0.00    0.33    0.07   -0.01    0.01    0.00    0.00    0.03    0.01    0.00    0.00    0.00
     0.00    0.00    0.00    0.00    0.52   -0.01    0.00    0.42   -0.00   -0.00    0.44   -0.01
    -0.00    0.44    0.00   -0.00    0.00    0.01    0.00    0.01    0.00    0.00    0.00    0.00
     0.00    0.00    0.00    0.00    0.52   -0.01    0.00    0.42   -0.00   -0.00    0.44   -0.01
    -0.00    0.44    0.00   -0.00    0.00    0.01    0.00    0.01    0.00    0.00    0.00    0.00
     0.00    0.00    0.00    0.00    0.94   -0.00   -0.00    0.93   -0.00    0.00    0.67   -0.00
     0.00    0.70    0.00   -0.00    0.01    0.00    0.00    0.01    0.01    0.00    0.00    0.00
     0.00    0.00    0.00    0.00    0.52    0.00   -0.00    0.01    0.02    0.01    0.00    0.00
     0.00    0.00    0.00    0.53    0.01   -0.00    0.01    0.01    0.01    0.00    0.00    0.00
     0.00    0.00    0.52    0.00   -0.00    0.01    0.02    0.01    0.00    0.00    0.00    0.00
     0.00    0.52    0.00   -0.00    0.01    0.02    0.01    0.00    0.00    0.00    0.00    0.00
     0.52    0.00   -0.00    0.01    0.02    0.01    0.00    0.00    0.00    0.00    0.00    0.53
     0.01   -0.00    0.01    0.01    0.01    0.00    0.00    0.00    0.00    0.00


                                   ***** SPIN 2 *****


                                       === A ===


 SFO contributions (%) per orbital
 (multiplication by the orbital occupation yields the SFO Gross Populations)

 Orb.:        3      4      5      6      7      8      9     10     11     12     13     14     15     16
 occup:     1.00   1.00   1.00   1.00   1.00   1.00   1.00   1.00   1.00   1.00   0.00   0.00   0.00   0.00
 CF+SFO     ----   ----   ----   ----   ----   ----   ----   ----   ----   ----   ----   ----   ----   ----
 ------
      5:    0.00  21.21   0.00   0.00   0.04  -0.00   0.72   0.00   0.00  -0.00   0.00  -1.42   0.00  -0.00
      6:   -0.00   0.10   0.00  -0.00   0.23   0.00   0.45  -0.00  -0.00   0.00  -0.00  -1.54  -0.00   0.00
      8:    6.43   0.00  -0.00  22.21  -0.00  -0.00  -0.00   5.39  -0.00   0.87   0.00   0.00  -6.63  -0.00
      9:   -6.51   0.00  -0.00   2.53  -0.00  -0.00  -0.00   3.30  -0.00   1.72  -0.00  -0.00 -19.76   0.00
     10:   -0.09   0.00  -0.00  -0.32   0.00  -0.00   0.00  -0.19  -0.00  -0.05  -0.00   0.00   1.33   0.00
     11:   -0.00   0.00  23.57   0.00   0.00   0.00   0.00  -0.00  12.68  -0.00  54.14  -0.00  -0.00   8.31
     12:    0.00   0.00  -1.23   0.00   0.00  -0.00   0.00  -0.00   1.03   0.00  -3.52  -0.00   0.00   7.29
     14:    0.00   2.56   0.00   0.00   7.55   0.00   3.78   0.00   0.00  -0.00   0.00  -0.01   0.00  -0.00
     15:    0.00   0.20   0.00   0.00   1.17  -0.00   6.73   0.00   0.00  -0.00  -0.00  -0.36  -0.00   0.00
     20:    0.25   0.00  -0.00   0.08   0.00   0.00   0.00   0.18   0.00   2.56  -0.00   0.00   0.00   0.00
     21:   -0.00  -0.00   0.01  -0.00  -0.00   0.00   0.00  -0.00   1.20  -0.00   0.81  -0.00  -0.00   0.01
     29:   26.26   2.40   0.00  -0.01   0.08   0.00   0.08  -0.09   0.00   1.25  -0.00   1.05   0.80   0.00
     30:    0.12   0.03  -0.00  -0.02   0.02  -0.00  -0.03  -0.14  -0.00  -0.53  -0.00  -4.75  -1.32  -0.00
     32:   -0.56  10.16   0.00   1.83   8.85  -0.00  -0.03  15.39   0.00   4.89  -0.00   0.05  -0.81   0.00
     33:   -1.20   0.37   0.00   0.13  -0.20  -0.00  -0.03   1.33   0.00   0.10   0.00  -0.10  -9.79  -0.00
     35:    0.00  -0.00  17.16   0.00  -0.00  22.57  -0.00   0.00   3.89   0.00   0.05   0.00   0.00   2.44
     36:    0.00  -0.00  -1.78   0.00  -0.00   0.84   0.00  -0.00   0.43  -0.00  -0.24  -0.00  -0.00 -25.55
     38:    0.11   2.59  -0.00  14.55   7.16   0.00  12.64   3.29   0.00   3.31  -0.00   1.05   0.58   0.00
     39:   -0.00   0.07  -0.00   0.48  -0.02   0.00  -0.73   0.22  -0.00   0.25   0.00  -2.50  -1.04  -0.00
     53:   26.26   2.40  -0.00  -0.01   0.08   0.00   0.08  -0.09  -0.00   1.25  -0.00   1.05   0.79  -0.00
     54:    0.12   0.03   0.00  -0.02   0.02   0.00  -0.03  -0.14   0.00  -0.53   0.00  -4.75  -1.32   0.00
     56:   -0.56  10.15   0.00   1.83   8.85   0.00  -0.03  15.39   0.00   4.89  -0.00   0.05  -0.81   0.00
     57:   -1.20   0.37   0.00   0.13  -0.20   0.00  -0.03   1.33   0.00   0.10   0.00  -0.10  -9.79  -0.00
     59:    0.00   0.00  17.16   0.00   0.00  22.57  -0.00   0.00   3.89   0.00   0.05  -0.00   0.00   2.44
     60:   -0.00  -0.00  -1.78   0.00   0.00   0.84  -0.00   0.00   0.43  -0.00  -0.24   0.00  -0.00 -25.55
     62:    0.11   2.59   0.00  14.55   7.16   0.00  12.64   3.29  -0.00   3.31   0.00   1.05   0.58  -0.00
     63:   -0.00   0.07   0.00   0.48  -0.02  -0.00  -0.73   0.22  -0.00   0.25  -0.00  -2.50  -1.04   0.00
     77:    0.00   8.42  -0.00   0.00   9.27  -0.00   4.76   0.00   0.00   0.00  -0.00   0.04   0.00   0.00
     80:    1.45   0.00  -0.00  15.98   0.00   0.00  -0.00   3.16   0.00  72.90   0.00   0.00   0.50  -0.00
     83:    0.00   0.00  10.56   0.00  -0.00   0.00  -0.00  -0.00  56.61  -0.00  32.71   0.00   0.00   1.01
     84:   -0.00   0.00  -0.28   0.00  -0.00  -0.00  -0.00  -0.00   0.03   0.00  -3.51  -0.00  -0.00  -0.77
     86:    0.00   8.78   0.00   0.00  21.89   0.00  31.20  -0.00   0.00   0.00  -0.00  -0.00   0.00   0.00
    101:    6.60   3.58   8.40   5.13   1.13  12.16   3.71   1.15   4.66   0.67   5.03   9.63   8.06  12.78
    102:    0.06  -0.05   0.16   0.23   0.01   0.55   0.13  -0.03   0.02  -0.01  -0.84  18.79  11.97  17.65
    103:   -0.21   0.05  -0.01  -0.01   0.00   0.04   0.02   0.00   0.01   0.00  -0.19  -0.74  -0.15   1.22
    112:    8.30   5.26  -0.00   0.69  10.11   0.00   5.09  20.36   0.00   0.14   0.00  -1.19   9.54  -0.00
    113:   -0.01   0.02  -0.00  -0.04   0.75   0.00   0.15   0.36   0.00   0.04  -0.00  -0.51  21.93  -0.00
    123:    6.60   3.58   8.41   5.12   1.13  12.16   3.71   1.15   4.66   0.67   5.02   9.63   8.06  12.77
    124:    0.06  -0.05   0.16   0.23   0.01   0.55   0.13  -0.03   0.02  -0.01  -0.84  18.79  11.97  17.66
    125:   -0.21   0.05  -0.01  -0.01   0.00   0.04   0.02   0.00   0.01   0.00  -0.19  -0.74  -0.15   1.22
    134:    6.60   3.58   8.41   5.12   1.13  12.16   3.71   1.15   4.66   0.67   5.02   9.63   8.06  12.77
    135:    0.06  -0.05   0.16   0.23   0.01   0.55   0.13  -0.03   0.02  -0.01  -0.84  18.79  11.97  17.66
    136:   -0.21   0.05  -0.01  -0.01   0.00   0.04   0.02   0.00   0.01   0.00  -0.19  -0.74  -0.15   1.22
    145:    6.61   3.58   8.40   5.12   1.13  12.16   3.71   1.15   4.66   0.67   5.03   9.63   8.06  12.78
    146:    0.06  -0.05   0.16   0.23   0.01   0.55   0.13  -0.03   0.02  -0.01  -0.84  18.79  11.97  17.65
    147:   -0.21   0.05  -0.01  -0.01   0.00   0.04   0.02   0.00   0.01   0.00  -0.19  -0.74  -0.15   1.22
    156:    8.31   5.26   0.00   0.69  10.11   0.00   5.09  20.36  -0.00   0.14  -0.00  -1.19   9.53  -0.00
    157:   -0.01   0.02   0.00  -0.04   0.75   0.00   0.15   0.36  -0.00   0.04   0.00  -0.51  21.93   0.00


 Summation over all MOs, multiplied by occupation: Total SFO Gross Populations in this Irrep
 ===========================================================================================

     0.00    0.00    0.00    0.00    0.53   -0.00    0.00    0.35    0.01   -0.01    0.36   -0.00
    -0.00    0.33    0.07   -0.01    0.01    0.00    0.00    0.03    0.01    0.00    0.00    0.00
     0.00    0.00    0.00    0.00    0.52   -0.01    0.00    0.42   -0.00   -0.00    0.44   -0.01
    -0.00    0.44    0.00   -0.00    0.00    0.01    0.00    0.01    0.00    0.00    0.00    0.00
     0.00    0.00    0.00    0.00    0.52   -0.01    0.00    0.42   -0.00   -0.00    0.44   -0.01
    -0.00    0.44    0.00   -0.00    0.00    0.01    0.00    0.01    0.00    0.00    0.00    0.00
     0.00    0.00    0.00    0.00    0.94   -0.00   -0.00    0.93   -0.00    0.00    0.67   -0.00
     0.00    0.70    0.00   -0.00    0.01    0.00    0.00    0.01    0.01    0.00    0.00    0.00
     0.00    0.00    0.00    0.00    0.52    0.00   -0.00    0.01    0.02    0.01    0.00    0.00
     0.00    0.00    0.00    0.53    0.01   -0.00    0.01    0.01    0.01    0.00    0.00    0.00
     0.00    0.00    0.52    0.00   -0.00    0.01    0.02    0.01    0.00    0.00    0.00    0.00
     0.00    0.52    0.00   -0.00    0.01    0.02    0.01    0.00    0.00    0.00    0.00    0.00
     0.52    0.00   -0.00    0.01    0.02    0.01    0.00    0.00    0.00    0.00    0.00    0.53
     0.01   -0.00    0.01    0.01    0.01    0.00    0.00    0.00    0.00    0.00


 List of all MOs, ordered by energy, with the most significant SFO gross populations
 ===================================================================================

 Each percentage contribution in the table below corresponds to the indicated SFO.
 In general, a SFO may be a linear combination of several Fragment Orbitals on the same,
 or on symmetry-related Fragments. Only the first 'member' of such a combination is
 specified here. A full definition of all SFOs is given in an earlier part of the output.
 The numbering of the SFOs in this table does NOT include the Core Orbitals, and starts
 from one for each symmetry representation, as in the SFO definition list earlier.


                                       *** SPIN 1 ***


       E(eV)  Occ       MO           %     SFO (first member)   E(eV)  Occ   Fragment
 -------------------------------------------------------------------------------------

     -19.154  1.00     2 A         20.93%     1 S             -13.801  2.00     3 C
                                   20.93%     1 S             -13.801  2.00     2 C
                                   16.10%     1 S             -13.801  2.00     1 C
                                   11.79%     1 P:z            -5.325  0.67     1 C
                                    5.91%     1 S             -24.021  2.00     4 O
                                    4.85%     1 S              -6.494  1.00     5 H
                                    4.85%     1 S              -6.494  1.00     8 H
                                    4.85%     1 S              -6.494  1.00     9 H
                                    4.85%     1 S              -6.494  1.00     7 H
                                    2.54%     1 S              -6.494  1.00    10 H
                                    2.54%     1 S              -6.494  1.00     6 H
                                   -1.36%     2 P:z             4.656  0.00     1 C
                                    1.23%     1 P:x            -5.325  0.67     3 C
                                    1.23%     1 P:x            -5.325  0.67     2 C
     -17.623  1.00     3 A         26.26%     1 S             -13.801  2.00     2 C
                                   26.26%     1 S             -13.801  2.00     3 C
                                    8.31%     1 S              -6.494  1.00    10 H
                                    8.30%     1 S              -6.494  1.00     6 H
                                    6.61%     1 S              -6.494  1.00     9 H
                                    6.60%     1 S              -6.494  1.00     8 H
                                    6.60%     1 S              -6.494  1.00     7 H
                                    6.60%     1 S              -6.494  1.00     5 H
                                   -6.51%     2 P:x             4.656  0.00     1 C
                                    6.43%     1 P:x            -5.325  0.67     1 C
                                    1.45%     1 P:x            -9.088  1.33     4 O
                                   -1.20%     2 P:x             4.656  0.00     3 C
                                   -1.20%     2 P:x             4.656  0.00     2 C
     -13.126  1.00     4 A         21.21%     1 S             -13.801  2.00     1 C
                                   10.16%     1 P:x            -5.325  0.67     2 C
                                   10.15%     1 P:x            -5.325  0.67     3 C
                                    8.78%     1 P:z            -9.088  1.33     4 O
                                    8.42%     1 S             -24.021  2.00     4 O
                                    5.26%     1 S              -6.494  1.00     6 H
                                    5.26%     1 S              -6.494  1.00    10 H
                                    3.58%     1 S              -6.494  1.00     7 H
                                    3.58%     1 S              -6.494  1.00     9 H
                                    3.58%     1 S              -6.494  1.00     5 H
                                    3.58%     1 S              -6.494  1.00     8 H
                                    2.59%     1 P:z            -5.325  0.67     2 C
                                    2.59%     1 P:z            -5.325  0.67     3 C
                                    2.56%     1 P:z            -5.325  0.67     1 C
                                    2.40%     1 S             -13.801  2.00     2 C
                                    2.40%     1 S             -13.801  2.00     3 C
     -11.383  1.00     5 A         23.57%     1 P:y            -5.325  0.67     1 C
                                   17.16%     1 P:y            -5.325  0.67     2 C
                                   17.16%     1 P:y            -5.325  0.67     3 C
                                   10.56%     1 P:y            -9.088  1.33     4 O
                                    8.41%     1 S              -6.494  1.00     7 H
                                    8.41%     1 S              -6.494  1.00     8 H
                                    8.40%     1 S              -6.494  1.00     9 H
                                    8.40%     1 S              -6.494  1.00     5 H
                                   -1.78%     2 P:y             4.656  0.00     2 C
                                   -1.78%     2 P:y             4.656  0.00     3 C
                                   -1.23%     2 P:y             4.656  0.00     1 C
     -11.289  1.00     6 A         22.21%     1 P:x            -5.325  0.67     1 C
                                   15.98%     1 P:x            -9.088  1.33     4 O
                                   14.55%     1 P:z            -5.325  0.67     3 C
                                   14.55%     1 P:z            -5.325  0.67     2 C
                                    5.13%     1 S              -6.494  1.00     5 H
                                    5.12%     1 S              -6.494  1.00     7 H
                                    5.12%     1 S              -6.494  1.00     8 H
                                    5.12%     1 S              -6.494  1.00     9 H
                                    2.53%     2 P:x             4.656  0.00     1 C
                                    1.83%     1 P:x            -5.325  0.67     2 C
                                    1.83%     1 P:x            -5.325  0.67     3 C
     -11.023  1.00     7 A         21.89%     1 P:z            -9.088  1.33     4 O
                                   10.11%     1 S              -6.494  1.00     6 H
                                   10.11%     1 S              -6.494  1.00    10 H
                                    9.27%     1 S             -24.021  2.00     4 O
                                    8.85%     1 P:x            -5.325  0.67     3 C
                                    8.85%     1 P:x            -5.325  0.67     2 C
                                    7.55%     1 P:z            -5.325  0.67     1 C
                                    7.16%     1 P:z            -5.325  0.67     2 C
                                    7.16%     1 P:z            -5.325  0.67     3 C
                                    1.17%     2 P:z             4.656  0.00     1 C
                                    1.13%     1 S              -6.494  1.00     8 H
                                    1.13%     1 S              -6.494  1.00     5 H
                                    1.13%     1 S              -6.494  1.00     9 H
                                    1.13%     1 S              -6.494  1.00     7 H
      -9.871  1.00     8 A         22.57%     1 P:y            -5.325  0.67     3 C
                                   22.57%     1 P:y            -5.325  0.67     2 C
                                   12.16%     1 S              -6.494  1.00     7 H
                                   12.16%     1 S              -6.494  1.00     9 H
                                   12.16%     1 S              -6.494  1.00     8 H
                                   12.16%     1 S              -6.494  1.00     5 H
      -9.590  1.00     9 A         31.20%     1 P:z            -9.088  1.33     4 O
                                   12.64%     1 P:z            -5.325  0.67     3 C
                                   12.64%     1 P:z            -5.325  0.67     2 C
                                    6.73%     2 P:z             4.656  0.00     1 C
                                    5.09%     1 S              -6.494  1.00     6 H
                                    5.09%     1 S              -6.494  1.00    10 H
                                    4.76%     1 S             -24.021  2.00     4 O
                                    3.78%     1 P:z            -5.325  0.67     1 C
                                    3.71%     1 S              -6.494  1.00     5 H
                                    3.71%     1 S              -6.494  1.00     8 H
                                    3.71%     1 S              -6.494  1.00     9 H
                                    3.71%     1 S              -6.494  1.00     7 H
      -9.227  1.00    10 A         20.36%     1 S              -6.494  1.00    10 H
                                   20.36%     1 S              -6.494  1.00     6 H
                                   15.39%     1 P:x            -5.325  0.67     2 C
                                   15.39%     1 P:x            -5.325  0.67     3 C
                                    5.39%     1 P:x            -5.325  0.67     1 C
                                    3.30%     2 P:x             4.656  0.00     1 C
                                    3.29%     1 P:z            -5.325  0.67     3 C
                                    3.29%     1 P:z            -5.325  0.67     2 C
                                    3.16%     1 P:x            -9.088  1.33     4 O
                                    1.33%     2 P:x             4.656  0.00     2 C
                                    1.33%     2 P:x             4.656  0.00     3 C
                                    1.15%     1 S              -6.494  1.00     5 H
                                    1.15%     1 S              -6.494  1.00     7 H
                                    1.15%     1 S              -6.494  1.00     8 H
                                    1.15%     1 S              -6.494  1.00     9 H
      -8.618  1.00    11 A         56.61%     1 P:y            -9.088  1.33     4 O
                                   12.68%     1 P:y            -5.325  0.67     1 C
                                    4.66%     1 S              -6.494  1.00     9 H
                                    4.66%     1 S              -6.494  1.00     5 H
                                    4.66%     1 S              -6.494  1.00     7 H
                                    4.66%     1 S              -6.494  1.00     8 H
                                    3.89%     1 P:y            -5.325  0.67     3 C
                                    3.89%     1 P:y            -5.325  0.67     2 C
                                    1.20%     1 D:yz           33.593  0.00     1 C
                                    1.03%     2 P:y             4.656  0.00     1 C
      -5.698  1.00    12 A         72.90%     1 P:x            -9.088  1.33     4 O
                                    4.89%     1 P:x            -5.325  0.67     3 C
                                    4.89%     1 P:x            -5.325  0.67     2 C
                                    3.31%     1 P:z            -5.325  0.67     2 C
                                    3.31%     1 P:z            -5.325  0.67     3 C
                                    2.56%     1 D:xz           33.593  0.00     1 C
                                    1.72%     2 P:x             4.656  0.00     1 C
                                    1.25%     1 S             -13.801  2.00     3 C
                                    1.25%     1 S             -13.801  2.00     2 C
      -1.696  0.00    13 A         54.14%     1 P:y            -5.325  0.67     1 C
                                   32.71%     1 P:y            -9.088  1.33     4 O
                                    5.03%     1 S              -6.494  1.00     9 H
                                    5.03%     1 S              -6.494  1.00     5 H
                                    5.02%     1 S              -6.494  1.00     7 H
                                    5.02%     1 S              -6.494  1.00     8 H
                                   -3.52%     2 P:y             4.656  0.00     1 C
                                   -3.51%     2 P:y             9.588  0.00     4 O
      -0.351  0.00    14 A         18.79%     2 S               2.470  0.00     7 H
                                   18.79%     2 S               2.470  0.00     9 H
                                   18.79%     2 S               2.470  0.00     8 H
                                   18.79%     2 S               2.470  0.00     5 H
                                    9.63%     1 S              -6.494  1.00     7 H
                                    9.63%     1 S              -6.494  1.00     9 H
                                    9.63%     1 S              -6.494  1.00     8 H
                                    9.63%     1 S              -6.494  1.00     5 H
                                   -4.75%     2 S              11.837  0.00     3 C
                                   -4.75%     2 S              11.837  0.00     2 C
                                   -2.50%     2 P:z             4.656  0.00     3 C
                                   -2.50%     2 P:z             4.656  0.00     2 C
                                   -1.54%     2 S              11.837  0.00     1 C
                                   -1.42%     1 S             -13.801  2.00     1 C
                                   -1.19%     1 S              -6.494  1.00    10 H
                                   -1.19%     1 S              -6.494  1.00     6 H
                                    1.05%     1 P:z            -5.325  0.67     2 C
                                    1.05%     1 P:z            -5.325  0.67     3 C
                                    1.05%     1 S             -13.801  2.00     2 C
                                    1.05%     1 S             -13.801  2.00     3 C
       0.769  0.00    15 A         21.93%     2 S               2.470  0.00    10 H
                                   21.93%     2 S               2.470  0.00     6 H
                                  -19.76%     2 P:x             4.656  0.00     1 C
                                   11.97%     2 S               2.470  0.00     9 H
                                   11.97%     2 S               2.470  0.00     8 H
                                   11.97%     2 S               2.470  0.00     7 H
                                   11.97%     2 S               2.470  0.00     5 H
                                   -9.79%     2 P:x             4.656  0.00     3 C
                                   -9.79%     2 P:x             4.656  0.00     2 C
                                    9.54%     1 S              -6.494  1.00     6 H
                                    9.53%     1 S              -6.494  1.00    10 H
                                    8.06%     1 S              -6.494  1.00     7 H
                                    8.06%     1 S              -6.494  1.00     5 H
                                    8.06%     1 S              -6.494  1.00     9 H
                                    8.06%     1 S              -6.494  1.00     8 H
                                   -6.63%     1 P:x            -5.325  0.67     1 C
                                    1.33%     3 P:x            55.112  0.00     1 C
                                   -1.32%     2 S              11.837  0.00     2 C
                                   -1.32%     2 S              11.837  0.00     3 C
                                   -1.04%     2 P:z             4.656  0.00     2 C
                                   -1.04%     2 P:z             4.656  0.00     3 C
       1.101  0.00    16 A        -25.55%     2 P:y             4.656  0.00     2 C
                                  -25.55%     2 P:y             4.656  0.00     3 C
                                   17.66%     2 S               2.470  0.00     8 H
                                   17.66%     2 S               2.470  0.00     7 H
                                   17.65%     2 S               2.470  0.00     9 H
                                   17.65%     2 S               2.470  0.00     5 H
                                   12.78%     1 S              -6.494  1.00     5 H
                                   12.78%     1 S              -6.494  1.00     9 H
                                   12.77%     1 S              -6.494  1.00     8 H
                                   12.77%     1 S              -6.494  1.00     7 H
                                    8.31%     1 P:y            -5.325  0.67     1 C
                                    7.29%     2 P:y             4.656  0.00     1 C
                                    2.44%     1 P:y            -5.325  0.67     3 C
                                    2.44%     1 P:y            -5.325  0.67     2 C
                                    1.22%     3 S              41.412  0.00     8 H
                                    1.22%     3 S              41.412  0.00     7 H
                                    1.22%     3 S              41.412  0.00     9 H
                                    1.22%     3 S              41.412  0.00     5 H
                                    1.01%     1 P:y            -9.088  1.33     4 O
       1.350  0.00    17 A         33.83%     1 S              -6.494  1.00     6 H
                                   33.83%     1 S              -6.494  1.00    10 H
                                   23.88%     2 S               2.470  0.00     6 H
                                   23.88%     2 S               2.470  0.00    10 H
                                  -15.71%     2 P:z             4.656  0.00     3 C
                                  -15.71%     2 P:z             4.656  0.00     2 C
                                    6.74%     1 P:z            -5.325  0.67     3 C
                                    6.74%     1 P:z            -5.325  0.67     2 C
                                   -4.27%     2 P:x             4.656  0.00     3 C
                                   -4.27%     2 P:x             4.656  0.00     2 C
                                    3.11%     1 S              -6.494  1.00     8 H
                                    3.11%     1 S              -6.494  1.00     5 H
                                    3.11%     1 S              -6.494  1.00     7 H
                                    3.11%     1 S              -6.494  1.00     9 H
                                   -2.01%     2 S               2.470  0.00     9 H
                                   -2.01%     2 S               2.470  0.00     7 H
                                   -2.01%     2 S               2.470  0.00     5 H
                                   -2.01%     2 S               2.470  0.00     8 H
       2.050  0.00    18 A         26.17%     1 S              -6.494  1.00     6 H
                                   26.14%     1 S              -6.494  1.00    10 H
                                  -11.55%     2 P:z             4.656  0.00     3 C
                                  -11.55%     2 P:z             4.656  0.00     2 C
                                   10.04%     2 S               2.470  0.00    10 H
                                   10.03%     2 S               2.470  0.00     6 H
                                    7.42%     1 P:x            -5.325  0.67     2 C
                                    7.42%     1 P:x            -5.325  0.67     3 C
                                    7.04%     1 S              -6.494  1.00     8 H
                                    7.04%     1 S              -6.494  1.00     9 H
                                    7.03%     1 S              -6.494  1.00     5 H
                                    7.03%     1 S              -6.494  1.00     7 H
                                   -6.75%     2 P:x             4.656  0.00     2 C
                                   -6.75%     2 P:x             4.656  0.00     3 C
                                    2.53%     2 S               2.470  0.00     7 H
                                    2.53%     2 S               2.470  0.00     5 H
                                    2.52%     2 S               2.470  0.00     9 H
                                    2.52%     2 S               2.470  0.00     8 H
                                    1.43%     3 S              41.412  0.00    10 H
                                    1.43%     3 S              41.412  0.00     6 H
                                   -1.26%     2 P:x             4.656  0.00     1 C
                                    1.14%     1 P:z            -5.325  0.67     3 C
                                    1.14%     1 P:z            -5.325  0.67     2 C
       2.284  0.00    19 A        -20.40%     2 S              11.837  0.00     1 C
                                   19.61%     2 P:z             4.656  0.00     2 C
                                   19.61%     2 P:z             4.656  0.00     3 C
                                   13.05%     2 P:x             4.656  0.00     2 C
                                   13.04%     2 P:x             4.656  0.00     3 C
                                   11.15%     1 P:x            -5.325  0.67     3 C
                                   11.14%     1 P:x            -5.325  0.67     2 C
                                    8.41%     1 P:z            -5.325  0.67     1 C
                                    7.31%     1 P:z            -5.325  0.67     2 C
                                    7.31%     1 P:z            -5.325  0.67     3 C
                                    2.74%     1 S             -13.801  2.00     1 C
                                    2.59%     2 P:z             4.656  0.00     1 C
                                    2.07%     2 S               2.470  0.00    10 H
                                    2.07%     2 S               2.470  0.00     6 H
       2.334  0.00    20 A         24.78%     1 S              -6.494  1.00     5 H
                                   24.78%     1 S              -6.494  1.00     8 H
                                   24.78%     1 S              -6.494  1.00     9 H
                                   24.78%     1 S              -6.494  1.00     7 H
                                  -21.20%     2 P:y             4.656  0.00     3 C
                                  -21.20%     2 P:y             4.656  0.00     2 C
                                    9.19%     1 P:y            -5.325  0.67     3 C
                                    9.19%     1 P:y            -5.325  0.67     2 C
                                    3.69%     2 S               2.470  0.00     9 H
                                    3.69%     2 S               2.470  0.00     7 H
                                    3.69%     2 S               2.470  0.00     5 H
                                    3.69%     2 S               2.470  0.00     8 H
                                    1.81%     3 S              41.412  0.00     9 H
                                    1.81%     3 S              41.412  0.00     7 H
                                    1.81%     3 S              41.412  0.00     5 H
                                    1.81%     3 S              41.412  0.00     8 H
       3.194  0.00    21 A         20.34%     2 P:z             4.656  0.00     2 C
                                   20.34%     2 P:z             4.656  0.00     3 C
                                   13.22%     1 P:x            -5.325  0.67     2 C
                                   13.21%     1 P:x            -5.325  0.67     3 C
                                   12.71%     1 S             -13.801  2.00     1 C
                                   10.10%     1 S              -6.494  1.00     6 H
                                   10.10%     1 S              -6.494  1.00    10 H
                                   -6.73%     2 P:z             4.656  0.00     1 C
                                    6.05%     2 P:x             4.656  0.00     3 C
                                    6.05%     2 P:x             4.656  0.00     2 C
                                   -4.21%     2 S               2.470  0.00     6 H
                                   -4.21%     2 S               2.470  0.00    10 H
                                    3.90%     1 P:z            -5.325  0.67     2 C
                                    3.90%     1 P:z            -5.325  0.67     3 C
                                   -3.67%     1 P:z            -5.325  0.67     1 C
                                   -2.62%     2 S              11.837  0.00     1 C
                                   -2.16%     3 S              41.412  0.00    10 H
                                   -2.16%     3 S              41.412  0.00     6 H
                                    2.15%     1 P:z            -9.088  1.33     4 O
                                    1.75%     1 P:x            11.031  0.00     5 H
                                    1.75%     1 P:x            11.031  0.00     8 H
                                    1.75%     1 P:x            11.031  0.00     7 H
                                    1.75%     1 P:x            11.031  0.00     9 H
                                   -1.37%     2 S              24.659  0.00     4 O


                                       *** SPIN 2 ***


       E(eV)  Occ       MO           %     SFO (first member)   E(eV)  Occ   Fragment
 -------------------------------------------------------------------------------------

     -19.154  1.00     2 A         20.93%     1 S             -13.801  2.00     3 C
                                   20.93%     1 S             -13.801  2.00     2 C
                                   16.10%     1 S             -13.801  2.00     1 C
                                   11.79%     1 P:z            -5.325  0.67     1 C
                                    5.91%     1 S             -24.021  2.00     4 O
                                    4.85%     1 S              -6.494  1.00     5 H
                                    4.85%     1 S              -6.494  1.00     8 H
                                    4.85%     1 S              -6.494  1.00     9 H
                                    4.85%     1 S              -6.494  1.00     7 H
                                    2.54%     1 S              -6.494  1.00    10 H
                                    2.54%     1 S              -6.494  1.00     6 H
                                   -1.36%     2 P:z             4.656  0.00     1 C
                                    1.23%     1 P:x            -5.325  0.67     3 C
                                    1.23%     1 P:x            -5.325  0.67     2 C
     -17.623  1.00     3 A         26.26%     1 S             -13.801  2.00     2 C
                                   26.26%     1 S             -13.801  2.00     3 C
                                    8.31%     1 S              -6.494  1.00    10 H
                                    8.30%     1 S              -6.494  1.00     6 H
                                    6.61%     1 S              -6.494  1.00     9 H
                                    6.60%     1 S              -6.494  1.00     8 H
                                    6.60%     1 S              -6.494  1.00     7 H
                                    6.60%     1 S              -6.494  1.00     5 H
                                   -6.51%     2 P:x             4.656  0.00     1 C
                                    6.43%     1 P:x            -5.325  0.67     1 C
                                    1.45%     1 P:x            -9.088  1.33     4 O
                                   -1.20%     2 P:x             4.656  0.00     3 C
                                   -1.20%     2 P:x             4.656  0.00     2 C
     -13.126  1.00     4 A         21.21%     1 S             -13.801  2.00     1 C
                                   10.16%     1 P:x            -5.325  0.67     2 C
                                   10.15%     1 P:x            -5.325  0.67     3 C
                                    8.78%     1 P:z            -9.088  1.33     4 O
                                    8.42%     1 S             -24.021  2.00     4 O
                                    5.26%     1 S              -6.494  1.00     6 H
                                    5.26%     1 S              -6.494  1.00    10 H
                                    3.58%     1 S              -6.494  1.00     7 H
                                    3.58%     1 S              -6.494  1.00     9 H
                                    3.58%     1 S              -6.494  1.00     5 H
                                    3.58%     1 S              -6.494  1.00     8 H
                                    2.59%     1 P:z            -5.325  0.67     2 C
                                    2.59%     1 P:z            -5.325  0.67     3 C
                                    2.56%     1 P:z            -5.325  0.67     1 C
                                    2.40%     1 S             -13.801  2.00     2 C
                                    2.40%     1 S             -13.801  2.00     3 C
     -11.383  1.00     5 A         23.57%     1 P:y            -5.325  0.67     1 C
                                   17.16%     1 P:y            -5.325  0.67     2 C
                                   17.16%     1 P:y            -5.325  0.67     3 C
                                   10.56%     1 P:y            -9.088  1.33     4 O
                                    8.41%     1 S              -6.494  1.00     7 H
                                    8.41%     1 S              -6.494  1.00     8 H
                                    8.40%     1 S              -6.494  1.00     9 H
                                    8.40%     1 S              -6.494  1.00     5 H
                                   -1.78%     2 P:y             4.656  0.00     2 C
                                   -1.78%     2 P:y             4.656  0.00     3 C
                                   -1.23%     2 P:y             4.656  0.00     1 C
     -11.289  1.00     6 A         22.21%     1 P:x            -5.325  0.67     1 C
                                   15.98%     1 P:x            -9.088  1.33     4 O
                                   14.55%     1 P:z            -5.325  0.67     3 C
                                   14.55%     1 P:z            -5.325  0.67     2 C
                                    5.13%     1 S              -6.494  1.00     5 H
                                    5.12%     1 S              -6.494  1.00     7 H
                                    5.12%     1 S              -6.494  1.00     8 H
                                    5.12%     1 S              -6.494  1.00     9 H
                                    2.53%     2 P:x             4.656  0.00     1 C
                                    1.83%     1 P:x            -5.325  0.67     2 C
                                    1.83%     1 P:x            -5.325  0.67     3 C
     -11.023  1.00     7 A         21.89%     1 P:z            -9.088  1.33     4 O
                                   10.11%     1 S              -6.494  1.00     6 H
                                   10.11%     1 S              -6.494  1.00    10 H
                                    9.27%     1 S             -24.021  2.00     4 O
                                    8.85%     1 P:x            -5.325  0.67     3 C
                                    8.85%     1 P:x            -5.325  0.67     2 C
                                    7.55%     1 P:z            -5.325  0.67     1 C
                                    7.16%     1 P:z            -5.325  0.67     2 C
                                    7.16%     1 P:z            -5.325  0.67     3 C
                                    1.17%     2 P:z             4.656  0.00     1 C
                                    1.13%     1 S              -6.494  1.00     8 H
                                    1.13%     1 S              -6.494  1.00     5 H
                                    1.13%     1 S              -6.494  1.00     9 H
                                    1.13%     1 S              -6.494  1.00     7 H
      -9.871  1.00     8 A         22.57%     1 P:y            -5.325  0.67     3 C
                                   22.57%     1 P:y            -5.325  0.67     2 C
                                   12.16%     1 S              -6.494  1.00     7 H
                                   12.16%     1 S              -6.494  1.00     9 H
                                   12.16%     1 S              -6.494  1.00     8 H
                                   12.16%     1 S              -6.494  1.00     5 H
      -9.590  1.00     9 A         31.20%     1 P:z            -9.088  1.33     4 O
                                   12.64%     1 P:z            -5.325  0.67     3 C
                                   12.64%     1 P:z            -5.325  0.67     2 C
                                    6.73%     2 P:z             4.656  0.00     1 C
                                    5.09%     1 S              -6.494  1.00     6 H
                                    5.09%     1 S              -6.494  1.00    10 H
                                    4.76%     1 S             -24.021  2.00     4 O
                                    3.78%     1 P:z            -5.325  0.67     1 C
                                    3.71%     1 S              -6.494  1.00     5 H
                                    3.71%     1 S              -6.494  1.00     8 H
                                    3.71%     1 S              -6.494  1.00     9 H
                                    3.71%     1 S              -6.494  1.00     7 H
      -9.227  1.00    10 A         20.36%     1 S              -6.494  1.00    10 H
                                   20.36%     1 S              -6.494  1.00     6 H
                                   15.39%     1 P:x            -5.325  0.67     2 C
                                   15.39%     1 P:x            -5.325  0.67     3 C
                                    5.39%     1 P:x            -5.325  0.67     1 C
                                    3.30%     2 P:x             4.656  0.00     1 C
                                    3.29%     1 P:z            -5.325  0.67     3 C
                                    3.29%     1 P:z            -5.325  0.67     2 C
                                    3.16%     1 P:x            -9.088  1.33     4 O
                                    1.33%     2 P:x             4.656  0.00     2 C
                                    1.33%     2 P:x             4.656  0.00     3 C
                                    1.15%     1 S              -6.494  1.00     5 H
                                    1.15%     1 S              -6.494  1.00     7 H
                                    1.15%     1 S              -6.494  1.00     8 H
                                    1.15%     1 S              -6.494  1.00     9 H
      -8.618  1.00    11 A         56.61%     1 P:y            -9.088  1.33     4 O
                                   12.68%     1 P:y            -5.325  0.67     1 C
                                    4.66%     1 S              -6.494  1.00     9 H
                                    4.66%     1 S              -6.494  1.00     5 H
                                    4.66%     1 S              -6.494  1.00     7 H
                                    4.66%     1 S              -6.494  1.00     8 H
                                    3.89%     1 P:y            -5.325  0.67     3 C
                                    3.89%     1 P:y            -5.325  0.67     2 C
                                    1.20%     1 D:yz           33.593  0.00     1 C
                                    1.03%     2 P:y             4.656  0.00     1 C
      -5.698  1.00    12 A         72.90%     1 P:x            -9.088  1.33     4 O
                                    4.89%     1 P:x            -5.325  0.67     3 C
                                    4.89%     1 P:x            -5.325  0.67     2 C
                                    3.31%     1 P:z            -5.325  0.67     2 C
                                    3.31%     1 P:z            -5.325  0.67     3 C
                                    2.56%     1 D:xz           33.593  0.00     1 C
                                    1.72%     2 P:x             4.656  0.00     1 C
                                    1.25%     1 S             -13.801  2.00     3 C
                                    1.25%     1 S             -13.801  2.00     2 C
      -1.696  0.00    13 A         54.14%     1 P:y            -5.325  0.67     1 C
                                   32.71%     1 P:y            -9.088  1.33     4 O
                                    5.03%     1 S              -6.494  1.00     9 H
                                    5.03%     1 S              -6.494  1.00     5 H
                                    5.02%     1 S              -6.494  1.00     7 H
                                    5.02%     1 S              -6.494  1.00     8 H
                                   -3.52%     2 P:y             4.656  0.00     1 C
                                   -3.51%     2 P:y             9.588  0.00     4 O
      -0.351  0.00    14 A         18.79%     2 S               2.470  0.00     7 H
                                   18.79%     2 S               2.470  0.00     9 H
                                   18.79%     2 S               2.470  0.00     8 H
                                   18.79%     2 S               2.470  0.00     5 H
                                    9.63%     1 S              -6.494  1.00     7 H
                                    9.63%     1 S              -6.494  1.00     9 H
                                    9.63%     1 S              -6.494  1.00     8 H
                                    9.63%     1 S              -6.494  1.00     5 H
                                   -4.75%     2 S              11.837  0.00     3 C
                                   -4.75%     2 S              11.837  0.00     2 C
                                   -2.50%     2 P:z             4.656  0.00     3 C
                                   -2.50%     2 P:z             4.656  0.00     2 C
                                   -1.54%     2 S              11.837  0.00     1 C
                                   -1.42%     1 S             -13.801  2.00     1 C
                                   -1.19%     1 S              -6.494  1.00    10 H
                                   -1.19%     1 S              -6.494  1.00     6 H
                                    1.05%     1 P:z            -5.325  0.67     2 C
                                    1.05%     1 P:z            -5.325  0.67     3 C
                                    1.05%     1 S             -13.801  2.00     2 C
                                    1.05%     1 S             -13.801  2.00     3 C
       0.769  0.00    15 A         21.93%     2 S               2.470  0.00    10 H
                                   21.93%     2 S               2.470  0.00     6 H
                                  -19.76%     2 P:x             4.656  0.00     1 C
                                   11.97%     2 S               2.470  0.00     9 H
                                   11.97%     2 S               2.470  0.00     8 H
                                   11.97%     2 S               2.470  0.00     7 H
                                   11.97%     2 S               2.470  0.00     5 H
                                   -9.79%     2 P:x             4.656  0.00     3 C
                                   -9.79%     2 P:x             4.656  0.00     2 C
                                    9.54%     1 S              -6.494  1.00     6 H
                                    9.53%     1 S              -6.494  1.00    10 H
                                    8.06%     1 S              -6.494  1.00     7 H
                                    8.06%     1 S              -6.494  1.00     5 H
                                    8.06%     1 S              -6.494  1.00     9 H
                                    8.06%     1 S              -6.494  1.00     8 H
                                   -6.63%     1 P:x            -5.325  0.67     1 C
                                    1.33%     3 P:x            55.112  0.00     1 C
                                   -1.32%     2 S              11.837  0.00     2 C
                                   -1.32%     2 S              11.837  0.00     3 C
                                   -1.04%     2 P:z             4.656  0.00     2 C
                                   -1.04%     2 P:z             4.656  0.00     3 C
       1.101  0.00    16 A        -25.55%     2 P:y             4.656  0.00     2 C
                                  -25.55%     2 P:y             4.656  0.00     3 C
                                   17.66%     2 S               2.470  0.00     8 H
                                   17.66%     2 S               2.470  0.00     7 H
                                   17.65%     2 S               2.470  0.00     9 H
                                   17.65%     2 S               2.470  0.00     5 H
                                   12.78%     1 S              -6.494  1.00     5 H
                                   12.78%     1 S              -6.494  1.00     9 H
                                   12.77%     1 S              -6.494  1.00     8 H
                                   12.77%     1 S              -6.494  1.00     7 H
                                    8.31%     1 P:y            -5.325  0.67     1 C
                                    7.29%     2 P:y             4.656  0.00     1 C
                                    2.44%     1 P:y            -5.325  0.67     3 C
                                    2.44%     1 P:y            -5.325  0.67     2 C
                                    1.22%     3 S              41.412  0.00     8 H
                                    1.22%     3 S              41.412  0.00     7 H
                                    1.22%     3 S              41.412  0.00     9 H
                                    1.22%     3 S              41.412  0.00     5 H
                                    1.01%     1 P:y            -9.088  1.33     4 O
       1.350  0.00    17 A         33.83%     1 S              -6.494  1.00     6 H
                                   33.83%     1 S              -6.494  1.00    10 H
                                   23.88%     2 S               2.470  0.00     6 H
                                   23.88%     2 S               2.470  0.00    10 H
                                  -15.71%     2 P:z             4.656  0.00     3 C
                                  -15.71%     2 P:z             4.656  0.00     2 C
                                    6.74%     1 P:z            -5.325  0.67     3 C
                                    6.74%     1 P:z            -5.325  0.67     2 C
                                   -4.27%     2 P:x             4.656  0.00     3 C
                                   -4.27%     2 P:x             4.656  0.00     2 C
                                    3.11%     1 S              -6.494  1.00     8 H
                                    3.11%     1 S              -6.494  1.00     5 H
                                    3.11%     1 S              -6.494  1.00     7 H
                                    3.11%     1 S              -6.494  1.00     9 H
                                   -2.01%     2 S               2.470  0.00     9 H
                                   -2.01%     2 S               2.470  0.00     7 H
                                   -2.01%     2 S               2.470  0.00     5 H
                                   -2.01%     2 S               2.470  0.00     8 H
       2.050  0.00    18 A         26.17%     1 S              -6.494  1.00     6 H
                                   26.14%     1 S              -6.494  1.00    10 H
                                  -11.55%     2 P:z             4.656  0.00     3 C
                                  -11.55%     2 P:z             4.656  0.00     2 C
                                   10.04%     2 S               2.470  0.00    10 H
                                   10.03%     2 S               2.470  0.00     6 H
                                    7.42%     1 P:x            -5.325  0.67     2 C
                                    7.42%     1 P:x            -5.325  0.67     3 C
                                    7.04%     1 S              -6.494  1.00     8 H
                                    7.04%     1 S              -6.494  1.00     9 H
                                    7.03%     1 S              -6.494  1.00     5 H
                                    7.03%     1 S              -6.494  1.00     7 H
                                   -6.75%     2 P:x             4.656  0.00     2 C
                                   -6.75%     2 P:x             4.656  0.00     3 C
                                    2.53%     2 S               2.470  0.00     7 H
                                    2.53%     2 S               2.470  0.00     5 H
                                    2.52%     2 S               2.470  0.00     9 H
                                    2.52%     2 S               2.470  0.00     8 H
                                    1.43%     3 S              41.412  0.00    10 H
                                    1.43%     3 S              41.412  0.00     6 H
                                   -1.26%     2 P:x             4.656  0.00     1 C
                                    1.14%     1 P:z            -5.325  0.67     3 C
                                    1.14%     1 P:z            -5.325  0.67     2 C
       2.284  0.00    19 A        -20.40%     2 S              11.837  0.00     1 C
                                   19.61%     2 P:z             4.656  0.00     2 C
                                   19.61%     2 P:z             4.656  0.00     3 C
                                   13.05%     2 P:x             4.656  0.00     2 C
                                   13.04%     2 P:x             4.656  0.00     3 C
                                   11.15%     1 P:x            -5.325  0.67     3 C
                                   11.14%     1 P:x            -5.325  0.67     2 C
                                    8.41%     1 P:z            -5.325  0.67     1 C
                                    7.31%     1 P:z            -5.325  0.67     2 C
                                    7.31%     1 P:z            -5.325  0.67     3 C
                                    2.74%     1 S             -13.801  2.00     1 C
                                    2.59%     2 P:z             4.656  0.00     1 C
                                    2.07%     2 S               2.470  0.00    10 H
                                    2.07%     2 S               2.470  0.00     6 H
       2.334  0.00    20 A         24.78%     1 S              -6.494  1.00     5 H
                                   24.78%     1 S              -6.494  1.00     8 H
                                   24.78%     1 S              -6.494  1.00     9 H
                                   24.78%     1 S              -6.494  1.00     7 H
                                  -21.20%     2 P:y             4.656  0.00     3 C
                                  -21.20%     2 P:y             4.656  0.00     2 C
                                    9.19%     1 P:y            -5.325  0.67     3 C
                                    9.19%     1 P:y            -5.325  0.67     2 C
                                    3.69%     2 S               2.470  0.00     9 H
                                    3.69%     2 S               2.470  0.00     7 H
                                    3.69%     2 S               2.470  0.00     5 H
                                    3.69%     2 S               2.470  0.00     8 H
                                    1.81%     3 S              41.412  0.00     9 H
                                    1.81%     3 S              41.412  0.00     7 H
                                    1.81%     3 S              41.412  0.00     5 H
                                    1.81%     3 S              41.412  0.00     8 H
       3.194  0.00    21 A         20.34%     2 P:z             4.656  0.00     2 C
                                   20.34%     2 P:z             4.656  0.00     3 C
                                   13.22%     1 P:x            -5.325  0.67     2 C
                                   13.21%     1 P:x            -5.325  0.67     3 C
                                   12.71%     1 S             -13.801  2.00     1 C
                                   10.10%     1 S              -6.494  1.00     6 H
                                   10.10%     1 S              -6.494  1.00    10 H
                                   -6.73%     2 P:z             4.656  0.00     1 C
                                    6.05%     2 P:x             4.656  0.00     3 C
                                    6.05%     2 P:x             4.656  0.00     2 C
                                   -4.21%     2 S               2.470  0.00     6 H
                                   -4.21%     2 S               2.470  0.00    10 H
                                    3.90%     1 P:z            -5.325  0.67     2 C
                                    3.90%     1 P:z            -5.325  0.67     3 C
                                   -3.67%     1 P:z            -5.325  0.67     1 C
                                   -2.62%     2 S              11.837  0.00     1 C
                                   -2.16%     3 S              41.412  0.00    10 H
                                   -2.16%     3 S              41.412  0.00     6 H
                                    2.15%     1 P:z            -9.088  1.33     4 O
                                    1.75%     1 P:x            11.031  0.00     5 H
                                    1.75%     1 P:x            11.031  0.00     8 H
                                    1.75%     1 P:x            11.031  0.00     7 H
                                    1.75%     1 P:x            11.031  0.00     9 H
                                   -1.37%     2 S              24.659  0.00     4 O
1


 ===========================
 B O N D I N G   E N E R G Y  ***  (decomposition)  ***
 ===========================
  
*** IMPORTANT NOTE ***

The bond energy is computed as an energy difference between molecule and
fragments. In particular when the fragments are single atoms, they are usually
computed as SPHERICALLY SYMMETRIC and SPIN-RESTRICTED. Obviously, this usually
does NOT represent the true atomic groundstate.

To obtain the 'real' bond energy, (atomic) correction terms must be applied
for the true (multiplet) fragment ground state. See ref: E.J.Baerends,
V.Branchadell, M.Sodupe, Chem.Phys.Lett.265 (1997) 481

General theoretical background on the bond energy decomposition scheme used
here (Morokuma-Ziegler) can be found in the review paper:
F.M. Bickelhaupt and E.J. Baerends,
"Kohn-Sham Density Functional Theory: Predicting and Understanding Chemistry"
In: Rev. Comput. Chem.; Lipkowitz, K. B. and Boyd, D. B., Eds.;
Wiley-VCH: New York, 2000, Vol. 15, 1-86.

Symbols used in the Bickelhaupt-Baerends (BB) paper are given below to make
the direct connection to that paper, where detailed explanations can be found
on the meaning of the various terms.


                                                   hartree              eV         kcal/mol           kJ/mol
                                      --------------------     -----------       ----------      -----------

Pauli Repulsion
  Kinetic (Delta T^0):                  18.592582470168193        505.9299         11667.02         48814.82
  Delta V^Pauli Coulomb:                -9.528047632234356       -259.2714         -5978.94        -25015.89
  Delta V^Pauli LDA-XC:                 -2.369563242173803        -64.4791         -1486.92         -6221.29
  Delta V^Pauli GGA-Exchange:            0.085913251160605          2.3378            53.91           225.57
  Delta V^Pauli GGA-Correlation:        -0.014427346995281         -0.3926            -9.05           -37.88
                                      --------------------     -----------       ----------      -----------
  Total Pauli Repulsion:                 6.766457499925357        184.1247          4246.02         17765.33
 (Total Pauli Repulsion =
  Delta E^Pauli in BB paper)

Steric Interaction
  Pauli Repulsion (Delta E^Pauli):       6.766457499925357        184.1247          4246.02         17765.33
  Electrostatic Interaction:            -1.327125164675160        -36.1129          -832.78         -3484.37
 (Electrostatic Interaction =
  Delta V_elstat in the BB paper)
                                      --------------------     -----------       ----------      -----------
  Total Steric Interaction:              5.439332335250198        148.0118          3413.23         14280.97
 (Total Steric Interaction =
  Delta E^0 in the BB paper)

Orbital Interactions
  A:                                    -7.494755401613896       -203.9427         -4703.03        -19677.48
                                      --------------------     -----------       ----------      -----------
  Total Orbital Interactions:           -7.494507702829949       -203.9359         -4702.88        -19676.83

Alternative Decomposition Orb.Int.
  Kinetic:                             -16.750209290995620       -455.7964        -10510.92        -43977.67
  Coulomb:                               8.774488398051604        238.7660          5506.08         23037.42
  XC:                                    0.481213190114070         13.0945           301.97          1263.43
                                      --------------------     -----------       ----------      -----------
  Total Orbital Interactions:           -7.494507702829946       -203.9359         -4702.88        -19676.83

  Residu (E=Steric+OrbInt+Res):         -0.000002551993889         -0.0001            -0.00            -0.01

Total Bonding Energy:                   -2.055177919573641        -55.9242         -1289.64         -5395.87


Summary of Bonding Energy (energy terms are taken from the energy decomposition above)
======================================================================================

  Electrostatic Energy:                 -1.327125164675160        -36.1129          -832.78         -3484.37
  Kinetic Energy:                        1.842373179172570         50.1335          1156.11          4837.15
  Coulomb (Steric+OrbInt) Energy:       -0.753561786176641        -20.5055          -472.87         -1978.48
  XC Energy:                            -1.816864147894409        -49.4394         -1140.10         -4770.18
                                      --------------------     -----------       ----------      -----------
  Total Bonding Energy:                 -2.055177919573639        -55.9242         -1289.64         -5395.87


Correction terms (incorporated in energies above; only for test purposes):

1. Indication of fit-quality: 1st-order fit-correction used in the energy (hartree):   0.0000136351
2. Electrostatic (Fit correction):   0.0000000000

Scaled ZORA energy correction, not included in bonding energy (hartree):           -0.0000341091
 NOTE: This scaled ZORA energy correction should only be used to compare two calculations
 in which the only difference in the calculation is the electron configuration.
 Then the difference in energy of this term should be added to the difference in energy of
 the two electron configurations.
 This term should not be used otherwise.
 In practice it is useful only for core excitation energy calculations.


 =========================================
 F R A G M E N T   E N E R G Y   T E R M S  ***  (summed over all fragments)  ***
 =========================================
  

The energy terms below are (parts of) the Total Energy of the fragments from which the molecule
 is built.

Exchange and Correlation
  Exchange LDA:                        -21.515693294129271       -585.4718        -13501.30        -56489.44
  Exchange GGA:                         -2.630608590426839        -71.5825         -1650.73         -6906.66
  Correlation LDA:                      -1.900033171385752        -51.7025         -1192.29         -4988.54
  Correlation GGA:                       1.106459804023145         30.1083           694.31          2905.01
                                      --------------------     -----------       ----------      -----------
  Total XC:                            -24.939875251918714       -678.6485        -15650.01        -65479.63


 =======================================================================
 Electrostatic potential at the Nuclei due to electrons and other nuclei
 =======================================================================
  
         Atom                  Potential
         ----                  ---------
     1)   C                  14.64209678
     2)   C                  14.72073664
     3)   C                  14.72073660
     4)   O                  22.34164908
     5)   H                   1.08571178
     6)   H                   1.10080733
     7)   H                   1.08571152
     8)   H                   1.08571178
     9)   H                   1.08571156
    10)   H                   1.10080739
 
 
 ========================
 No memory problems found
 ========================
 
 Maximum number of active allocate calls:        2313
 
 *******************************************************************************

                             A D F   E X I T
 NORMAL TERMINATION with warnings


 =================
 Timing Statistics
 =================
  
 Total Used :                     CPU=      262.88      System=        2.30     Elapsed=     2121.94

 Calls  Section                     ( Mean, Percentage )
 ---------------------------------------------------------------------------------------------------
     3  ><      ................      0.00    0.00             0.00    0.00             0.01    0.00
     1  INIT    ................      3.20    1.22             0.07    3.10            26.20    1.23
     1  GEOMET  ................      0.68    0.26             0.04    1.84             5.81    0.27
     1  FRAGM   ................      0.01    0.00             0.01    0.31             0.06    0.00
     1  INPUTA  ................      0.00    0.00             0.00    0.01             0.00    0.00
     1  ATDEN   ................      0.00    0.00             0.00    0.19             0.10    0.00
     5  MAINSY  ................      0.44    0.84             0.02    4.40             3.68    0.87
     5  SYMFIT  ................      0.00    0.01             0.00    0.00             0.03    0.01
     5  CORORT  ................      0.02    0.04             0.00    1.04             0.20    0.05
     5  SYMORB  ................      0.01    0.03             0.00    0.18             0.12    0.03
     5  FITINT  ................      0.04    0.07             0.00    0.07             0.29    0.07
     5  CLSMAT  ................      0.01    0.02             0.00    0.73             0.14    0.03
     5  ORTHON  ................      1.13    2.15             0.01    3.21             9.16    2.16
     5  GENPT   ................      0.43    0.81             0.02    4.56             3.58    0.84
     5  PTBAS   ................      0.38    0.73             0.01    1.85             3.14    0.74
    54  FOCKY   ................      3.51   72.19             0.02   52.94            28.29   72.00
    54  FOCKTR  ................      0.26    5.30             0.00    1.18             2.06    5.25
    54  SDIIS   ................      0.27    5.46             0.00    5.49             2.15    5.48
     5  TOTEN   ................      3.50    6.66             0.02    4.73            28.17    6.64
     5  POPAN   ................      0.03    0.06             0.00    0.34             0.32    0.07
     5  DEBYE   ................      0.05    0.09             0.00    0.35             0.40    0.09
     5  INPUTE  ................      0.00    0.00             0.00    0.00             0.00    0.00
     5  SYMORE  ................      0.00    0.00             0.00    0.00             0.00    0.00
     9  ELNRGY  ................      0.45    1.56             0.02    7.03             3.79    1.61
     4  ENGRAD  ................      0.00    0.00             0.00    0.00             0.00    0.00
     1  COREPS  ................      3.81    1.45             0.01    0.33            30.57    1.44
     2  METS    ................      0.01    0.00             0.00    0.00             0.05    0.00
     1  CETS    ................      0.22    0.08             0.03    1.21             2.00    0.09
     1  POPUL   ................      2.55    0.97             0.11    4.71            21.29    1.00
     1  EXIT PROCEDURE .........      0.03    0.01             0.00    0.18             0.28    0.01


 Currently Open Files (EXIT00)
 ====================

 Unit    Access Format  Status   Type       Ident (file)
 -------------------------------------------------------
   3      SEQ    FORM   TRANSP  NORMAL      LOGFILE
                                          ( logfile )


 Buffered I/O statistics
 =======================
 Memory available:                     67108864
 Number of records fitting in memory:     16131
 Input :   0.3% of                       525341  *4k bytes
 Output:  11.3% of                        52822  *4k bytes
 Records from serial files evicted:           0
                    others evicted:           0
 Hash table lookups:    1490845 with          0 conflicts (  0.00%)
NORMAL TERMINATION with warnings
