# Supplementary material for: Spin Orbit Coupling in Orthogonal Charge Transfer States: (TD-)DFT of Pyrene - Dimethylaniline
Source: Preprints.org preprint supplement (doi:10.20944/preprints202112.0109.v2), 2021-12-16
Supplement: Supplementary file 3 [file supplementary › Supporting INFO-14-12-2021/Coordinate files/ACETONE-B/PBE/S2/acetone-S2-PBE.mol]

acetone-S2-PBE
SCM ADF package: www.scm.com

 10  9  0  0  0  0  0  0  0  0999 V2000
    0.0000   -0.0000   -0.5247 C   0  0  0  0  0  0  0  0  0  0  0  0
   -1.3133    0.0000    0.1605 C   0  0  0  0  0  0  0  0  0  0  0  0
    1.3133    0.0000    0.1605 C   0  0  0  0  0  0  0  0  0  0  0  0
   -0.0000   -0.0000   -1.8719 O   0  0  0  0  0  0  0  0  0  0  0  0
    1.4346    0.8884    0.8140 H   0  0  0  0  0  0  0  0  0  0  0  0
    2.1371    0.0000   -0.5639 H   0  0  0  0  0  0  0  0  0  0  0  0
    1.4347   -0.8884    0.8140 H   0  0  0  0  0  0  0  0  0  0  0  0
   -1.4346   -0.8884    0.8141 H   0  0  0  0  0  0  0  0  0  0  0  0
   -1.4346    0.8884    0.8140 H   0  0  0  0  0  0  0  0  0  0  0  0
   -2.1371   -0.0000   -0.5639 H   0  0  0  0  0  0  0  0  0  0  0  0
  1  3  1  0
  1  2  1  0
  2 10  1  0
  3  6  1  0
  2  8  1  0
  3  5  1  0
  3  7  1  0
  2  9  1  0
  1  4  2  0
M  END
