# Supplementary material for: Spin Orbit Coupling in Orthogonal Charge Transfer States: (TD-)DFT of Pyrene - Dimethylaniline
Source: Preprints.org preprint supplement (doi:10.20944/preprints202112.0109.v2), 2021-12-16
Supplement: Supplementary file 3 [file supplementary › Supporting INFO-14-12-2021/Coordinate files/ACETONE-B/PBE/S2/acetone-S2.out]

 *******************************************************************************
 *                                                                             *
 *  -------------------------------------                                      *
 *   Amsterdam Density Functional  (ADF)         2017                          *
 *  -------------------------------------                                      *
 *                                               r58813 2017-04-12             *
 *                                                                             *
 *                                                                             *
 *                            =====================                            *
 *                            |                   |                            *
 *                            |     D I R A C     |                            *
 *                            |                   |                            *
 *                            =====================                            *
 *                                                                             *
 *                                                                             *
 *   Online information and documentation:  https://www.scm.com/support/       *
 *   E-mail:  support@scm.com   info@scm.com                                   *
 *                                                                             *
 *   Scientific publications using ADF results must be properly referenced     *
 *   See the User Manuals (or the web site) for recommended citations          *
 *   The terms and conditions of the End User License Agreement apply to       *
 *   the use of ADF, https://www.scm.com/license-terms/                        *
 *                                                                             *
 **********************  x86_64_linux_intel / intelmpi  ************************
 
 Licensed to: SURF-SARA, Comp. & Networking Services / Amsterdam / NL
 SCM User ID: u7409
  
 DIRAC 2017  RunTime: Dec12-2020 05:11:27  Nodes: 1  Procs: 1

 Temporary files are created in /scratch/kid_0.Vcbxt0

1
 HYDROGEN ATOM RELATIVISTIC, Point Nuc, A and c from libtc   
 N J RN H ZN XION ANUC CLIGHT
 5000    1100.00000000197.36710137  1.00000000  0.00000000    1.007825  0.1370360E+03
  PH   PHI     EPS        DEL        DELRVR
  0.30  0.30     2500.00  0.00001000  0.00001000
 IDIRC  NC1  NDEBU NPRIN  IPUN IRCOR IWCOR
   1   300     0     0     0     0     0
   XALPHA      XLATTER      RNUC
  0.70000000  0.00000000  0.00000000 Point Charge
   XN   XL   XJ      XE          XZ      XDELL
  1.0  0.0  0.5      -1.000       1.000     0.00000
 ICORP=  0  NPCL=  0  DEMP=0.00  PEPS=0.000000
 R(1)=  0.1000000E-08 D=  0.1005080E+01 RNUC=  0.0000000E+00
 converged at cycle   32  DENSITY AVERAGING    0.2400
  MAXIMUM ERROR IN R.V(R) IS   0.79874357E-05
 Q,EY,EV,EZ,ESUM,ETOT,RHO  0.100000E+01 -0.266614E+00 -0.619969E+00 -0.910779E+00 -0.203940E+00 -0.415998E+00  0.337036E-17


 DIRAC CALCULATION
1                    HYDROGEN ATOM RELATIVISTIC, Point Nuc, A and c from libtc


 EXCHANGE COEFFICIENT=  0.7000000           TAIL CORRECTION=  0.           NUCLEAR RADIUS=  0.000E+00
0                       ORBITAL    N    L    J     ELECTRONS     EIGENVALUE                DELTA OF EIGENV.

                          1S1/2  1.0  0.0  0.5     1.000       -0.2039397E+00                 0.2720093E-06


                                        NUCLEAR CHARGE=    1.000000
                            INTEGRAL OF CHARGE DENSITY=    1.000000
                           SUM OF THE ORBITAL ENERGIES=     -0.2039
                                          TOTAL ENERGY=     -0.4160
                                        KINETIC ENERGY=      0.4160
                             NUCLEAR ATTRACTION ENERGY=     -0.9108
                             ELECTRON REPULSION ENERGY=      0.2787
                                       EXCHANGE ENERGY=     -0.2000

 *******************************************************************************

                             D I R A C   E X I T
 NORMAL TERMINATION


 =================
 Timing Statistics
 =================
  
 Total Used :                     CPU=        0.05      System=        0.01     Elapsed=        0.07

 Calls  Section                     ( Mean, Percentage )
 ---------------------------------------------------------------------------------------------------
     2  ><      ................      0.00    0.02             0.00    0.00             0.00    0.01
     1  EXIT PROCEDURE .........      0.05   99.98             0.01  100.00             0.07   99.99


 Currently Open Files (EXIT00)
 ====================

 Unit    Access Format  Status   Type       Ident (file)
 -------------------------------------------------------
   3      SEQ    FORM   TRANSP  NORMAL      LOGFILE
                                          ( logfile )


 Buffered I/O statistics
 =======================
 Memory available:                     67108864
 Number of records fitting in memory:     16131
 Input : 100.0% of                            0  *4k bytes
 Output: 100.0% of                            0  *4k bytes
 Records from serial files evicted:           0
                    others evicted:           0
 Hash table lookups:          0 with          0 conflicts (100.00%)
NORMAL TERMINATION

Create H   file=TZ2P-H
XC
  GGA PBE
End
relativistic ZORA
HartreeFock
Corepotentials t12.rel
End Input

 *******************************************************************************
 *                                                                             *
 *  -------------------------------------                                      *
 *   Amsterdam Density Functional  (ADF)         2017                          *
 *  -------------------------------------                                      *
 *                                               r58813 2017-04-12             *
 *                                                                             *
 *                                                                             *
 *                              =================                              *
 *                              |               |                              *
 *                              |     A D F     |                              *
 *                              |               |                              *
 *                              =================                              *
 *                                                                             *
 *                                                                             *
 *   Online information and documentation:  https://www.scm.com/support/       *
 *   E-mail:  support@scm.com   info@scm.com                                   *
 *                                                                             *
 *   Scientific publications using ADF results must be properly referenced     *
 *   See the User Manuals (or the web site) for recommended citations          *
 *   The terms and conditions of the End User License Agreement apply to       *
 *   the use of ADF, https://www.scm.com/license-terms/                        *
 *                                                                             *
 **********************  x86_64_linux_intel / intelmpi  ************************
 
 Licensed to: SURF-SARA, Comp. & Networking Services / Amsterdam / NL
 SCM User ID: u7409
  
 ADF 2017  RunTime: Dec12-2020 05:11:28  Nodes: 1  Procs: 1

 Temporary files are created in /scratch/kid_0.CY7AZf

 Hydrogen (TZ2P)


 ===========================
 A T T A C H E D   F I L E S
 ===========================
  
 CREATE - Data File:    TZ2P-H
                        Hydrogen (TZ2P)
 Core Potentials:
         file : t12.rel


 ===============================
 M O D E L   P A R A M E T E R S
 ===============================
  
 DENSITY FUNCTIONAL POTENTIAL (scf)
    LDA:                               PW92                                    == Not Default ==
    Gradient Corrections:              PBEc PBEx                               == Not Default ==

 SPIN  (restricted / unrestr.)
    Molecule:                          Restricted                               

 OTHER ASPECTS
    Relativistic Corrections:          scalar (ZORA,MAPA)                      == Not Default ==

    Nuclear Charge Density Model:      Point Charge Nuclei                      
    Core Treatment:                    Frozen Orbital(s)                        

    Hyperfine or Zeeman Interaction:   ---                                      


 =====================================
 S Y M M E T R Y ,   E L E C T R O N S
 =====================================
  
 Symmetry: ATOM

 Irreducible Representations, including subspecies
 -------------------------------------------------
 S
 P:x  P:y  P:z
 D:z2  D:x2-y2  D:xy  D:xz  D:yz
 F:z3  F:z  F:xyz  F:z2x  F:z2y  F:x  F:y


 Configuration of Valence Electrons
 ==================================

          Occupation Numbers
          -------------------------------------------------
 S        1
 P        0
 D        0
 F        0
          -------------------------------------------------

 Total:   1

 Net Charge: 0 (Nuclei minus Electrons)

 Preset values for MO occupations will be applied through SCF cycle no. 1000000
 Thereafter, the program will assign electrons to MOs that are spatially
 similar to the occupied MOs in a "reference" cycle ("KeepOrbitals").
 The reference cycle is always the PREVIOUS cycle: it will evolve with
 the SCF procedure.


 ================================
 (Slater-type)  F U N C T I O N S  ***  (Basis and Fit)  ***
 ================================
  

 Atom Type    1  (H)
 ==============

 Valence Basis Sets:   5
 -----------------------
   1 S    0.690000
   1 S    0.920000
   1 S    1.580000
   2 P    1.250000
   3 D    2.500000


 BAS: List of all Elementary Cartesian Basis Functions
 =====================================================

 The numbering in the list below (to the right of the function characteristics) is referred
 to in print-outs of MO eigenvectors and Mulliken populations in the BAS representation
 (as contrasted to the SFO representation).

 Notes:
 1. The functions are characterized by a polynomial prefactor (powers of x,y,z and r) and
    an exponential decay factor alpha.
 2. Since the basis sets are specific for an atom TYPE, the individual functions occur on
    all atoms of that type.
 3. The word 'Core' in the left margin signals that it is a Core Function (CF) : not a
    degree of freedom in the valence set, but only used to ensure orthogonalization of
    the other valence basis functions on the frozen Core Orbitals.


 (power of) X  Y  Z  R     Alpha  on Atom
            ==========     =====     ==========

 H                                    1
                                  ---------------------------------------------------------------------------
            0  0  0  0     0.690      1
            0  0  0  0     0.920      2
            0  0  0  0     1.580      3
            1  0  0  0     1.250      4
            0  1  0  0     1.250      5
            0  0  1  0     1.250      6
            2  0  0  0     2.500      7
            1  1  0  0     2.500      8
            1  0  1  0     2.500      9
            0  2  0  0     2.500     10
            0  1  1  0     2.500     11
            0  0  2  0     2.500     12

 Total number of charge fitting functions (nprimf)        50
 Total number of Cartesian basis functions (naos)         12
 Total number of Cartesian core functions  (ncos)          0


 BAS: List of all Elementary Cartesian Basis Functions
 =====================================================

 The numbering in the list below (to the right of the function characteristics) is referred
 to in print-outs of MO eigenvectors and Mulliken populations in the BAS representation
 (as contrasted to the SFO representation).

 Notes:
 1. The functions are characterized by a polynomial prefactor (powers of x,y,z and r) and
    an exponential decay factor alpha.
 2. Since the basis sets are specific for an atom TYPE, the individual functions occur on
    all atoms of that type.
 3. The word 'Core' in the left margin signals that it is a Core Function (CF) : not a
    degree of freedom in the valence set, but only used to ensure orthogonalization of
    the other valence basis functions on the frozen Core Orbitals.


 (power of) X  Y  Z  R     Alpha  on Atom
            ==========     =====     ==========

 H                                    1
                                  ---------------------------------------------------------------------------
            0  0  0  0     0.690      1
            0  0  0  0     0.920      2
            0  0  0  0     1.580      3
            1  0  0  0     1.250      4
            0  1  0  0     1.250      5
            0  0  1  0     1.250      6
            2  0  0  0     2.500      7
            1  1  0  0     2.500      8
            1  0  1  0     2.500      9
            0  2  0  0     2.500     10
            0  1  1  0     2.500     11
            0  0  2  0     2.500     12
1
 ***************************************************************************************************


                                              ***********************
                                              *  T E C H N I C A L  *
                                              ***********************
  


 =============================================================
 P A R A L L E L I Z A T I O N  and  V E C T O R I Z A T I O N
 =============================================================
  
 Nr of parallel processes:                                1
 Maximum vector length in NumInt loops:                 128

 IO buffersize (Mb):                                     64.000000


 =====================
 S C F   U P D A T E S
 =====================
  
 Max. nr. of cycles:                               300
 Convergence criterion:                              0.0000000100
   secondary criterion:                              0.0000000100

 Mix parameter (when DIIS does not apply):           0.2000000000
 Special mix parameter for the first cycle:          1.0000000000
 Mixed ADIIS+DIIS will be used
    Max number of expansion vectors:                10
    Pure ADIIS when Max([F,P]) is above              0.1000000000
    Pure DIIS when Max([F,P]) is below               0.0010000000
 Automatic ElectronSmearing (in case of problematic SCF convergence) disabled


 =================
 P R E C I S I O N  ***  (General: NumInt, NeglectFunctionTails, ...)  ***
 =================
  

 NumInt:           Target precision:                12.0000000000
 -------           Initial precision:               10.0000000000
                   Min. precision (optimization):   10.0000000000

 Neglect Functions:          Basis functions:        0.1000000000E-13
 ------------------          Fit functions:          0.1000000000E-13


 ===========================
 L I N E A R   S C A L I N G
 ===========================
  

 Cut-off radii density fit:                        0.1000000000E-97
 Overlap cut-off criterion AO matrix elements:     0.1000000000E-97
 Cut-offs for Coulomb potential and fitted density:0.1000000000E-97
 Cut-off criterion for Coulomb multipole terms:    0.1000000000E-97
 Progressive Convergence parameter:                 0.000000000    
1
 ***************************************************************************************************


                                            ***************************
                                            *  C O M P U T A T I O N  *
                                            ***************************
  

 Number of elements of the density matrix on this node (used, total):        78        78


 ===========================================
 Numerical Integration : Fuzzy Cells (Becke)
 ===========================================
  
 Becke grid quality: VERYGOOD       
  
 Lebedev angular grid order:             min:  13 max:  41
 Nr. of radial points:                   min:  64 max:  64

 Total nr. of points:         64
 Nr. of blocks:                1
 Block length:                64
 Nr. of dummy points:          0


 Test of Precision of the Numerical Integration Grid
 ===================================================

 Integral of the Total Core Density:                   0.00000000000000


 ========================
 Density Fitting (zlmFit)
 ========================
  
 ZlmFit Fit Quality: VERYGOOD       
  
 Max L-expansion:                        min:   0 max:   0
 Nr. of radial interpolation points:     min: 130 max: 130


 =====
 S C F  ***  ScaSCF  ***
 =====
  

 CYCLE    1
 SCF Error: norm([F,P])=      0.000000000000, max([F,P])=      0.000000000000
 orbitals (Q,E):
 ---------------
 S :1...3            ( 1.00    -0.5000)  ( 0.00    -0.0900)  ( 0.00     1.2936)
 P :1...1            ( 0.00     0.1562)
 D :1...1            ( 0.00     2.2914)

 CYCLE    2
 SCF Error: norm([F,P])=      0.031550472103, max([F,P])=      0.030121296888
 orbitals (Q,E):
 ---------------
 S :1...2            ( 1.00    -0.2218)  ( 0.00     0.1019)
 P :1...1            ( 0.00     0.4189)
 D :1...1            ( 0.00     2.5824)

 CYCLE    3
  SDIIS (wt  0.000):  0.1996  0.8004
 A-DIIS (wt  1.000):  0.0000  1.0000
  DIIS coefficients:  0.0000  1.0000
 SCF Error: norm([F,P])=      0.008620363195, max([F,P])=      0.008345718591
 orbitals (Q,E):
 ---------------
 S :1...2            ( 1.00    -0.2422)  ( 0.00     0.0889)
 P :1...1            ( 0.00     0.4024)
 D :1...1            ( 0.00     2.5619)

 CYCLE    4
  SDIIS (wt  0.993):  0.1666  0.8334
 A-DIIS (wt  0.007):  0.0000  1.0000
  DIIS coefficients:  0.1654  0.8346
 SCF Error: norm([F,P])=      0.001733197582, max([F,P])=      0.001719525172
 orbitals (Q,E):
 ---------------
 S :1...2            ( 1.00    -0.2386)  ( 0.00     0.0908)
 P :1...1            ( 0.00     0.4054)
 D :1...1            ( 0.00     2.5657)

 CYCLE    5
  SDIIS (wt  1.000):  0.0236  0.9764
  DIIS coefficients:  0.0236  0.9764
 SCF Error: norm([F,P])=      0.000043722685, max([F,P])=      0.000039815539
 orbitals (Q,E):
 ---------------
 S :1...2            ( 1.00    -0.2386)  ( 0.00     0.0908)
 P :1...1            ( 0.00     0.4054)
 D :1...1            ( 0.00     2.5656)

 CYCLE    6
  SDIIS (wt  1.000): -0.0578  1.0578
  DIIS coefficients: -0.0578  1.0578
 SCF Error: norm([F,P])=      0.000002387703, max([F,P])=      0.000002161666
 orbitals (Q,E):
 ---------------
 S :1...2            ( 1.00    -0.2386)  ( 0.00     0.0908)
 P :1...1            ( 0.00     0.4054)
 D :1...1            ( 0.00     2.5656)

 CYCLE    7
  SDIIS (wt  1.000): -0.0032  1.0032
  DIIS coefficients: -0.0032  1.0032
 SCF Error: norm([F,P])=      0.000000007756, max([F,P])=      0.000000007262
 orbitals (Q,E):
 ---------------
 S :1...2            ( 1.00    -0.2386)  ( 0.00     0.0908)
 P :1...1            ( 0.00     0.4054)
 D :1...1            ( 0.00     2.5656)

 SCF CONVERGED

 CYCLE    8
1
 ***************************************************************************************************


                                                *******************
                                                *  R E S U L T S  *
                                                *******************
  
  
 Hartree-Fock exchange energy:  -0.144886863649891     
 *** Setting up for NEW gradients in Focky
 *** Using FIT density in Focky

 Scaled ZORA Orbital Energies, per Irrep and Spin:
 =================================================
                        Occup              E (au)              E (eV)       Diff (eV) with prev. cycle
                        -----      --------------------        ------       --------------------------
 S
               1        1.000     -0.23862975420190E+00        -6.493               7.48E-09
               2        0.000      0.90763523721241E-01         2.470
               3        0.000      0.15217347450008E+01        41.409
 P
               1        0.000      0.40536414462565E+00        11.031
 D
               1        0.000      0.25655939238649E+01        69.813


 Partially Occupied:
               1 S                -0.23862975420190E+00
  
 LUMO :        2 S                 0.90763523721241E-01
  


 Orbital Energies, all Irreps
 ========================================

 Irrep        no.  (spin)   Occup              E (au)                E (eV)
 ---------------------------------------------------------------------------
 S             1             1.00       -0.23862975420190E+00        -6.4934
 S             2             0.00        0.90763523721241E-01         2.4698
 P             1             0.00        0.40536414462565E+00        11.0305
 S             3             0.00        0.15217347450008E+01        41.4085
 D             1             0.00        0.25655939238649E+01        69.8134


 All Electron Calculation, thus no Orbital Energies of the Core Orbitals are calculated


 =======================================
 M U L L I K E N   P O P U L A T I O N S
 =======================================
  
 The survey below gives for each atom:
 a) the total charge (Z minus electrons)
 b) the net spin polarization (nr of electrons spin-A minus spin-B)
 c) for each spin the atomic electron valence density (integrated) per L-value.

 Atom              Charge    Spin density          S         P         D         F
 ----              ------    ------------       ------    ------    ------    ------
 1 H               0.0000                       1.0000    0.0000    0.0000    0.0000

 Populations of individual BAS functions
 ----------------------------------------
 1 H            0.2107  0.6786  0.1108  0.0000  0.0000  0.0000  0.0000  0.0000  0.0000  0.0000
                0.0000  0.0000

 Gross Charges per Atom (Z minus electrons)
 ==========================================
             0.0000
 Net Total:  0.00000000


 =======================================================================
 Electrostatic potential at the Nuclei due to electrons and other nuclei
 =======================================================================
  
         Atom                  Potential
         ----                  ---------
     1)   H                   0.94465291
 
 
 ========================
 No memory problems found
 ========================
 
 Maximum number of active allocate calls:         382
 
 *******************************************************************************

                             A D F   E X I T
 NORMAL TERMINATION


 =================
 Timing Statistics
 =================
  
 Total Used :                     CPU=        0.19      System=        0.03     Elapsed=        0.31

 Calls  Section                     ( Mean, Percentage )
 ---------------------------------------------------------------------------------------------------
     3  ><      ................      0.00    0.01             0.00    2.72             0.00    1.06
     1  INIT    ................      0.00    1.98             0.02   50.68             0.06   19.36
     1  GEOMET  ................      0.01    3.76             0.00    6.53             0.02    5.17
     1  INPUTA  ................      0.00    0.00             0.00    5.76             0.00    0.81
     1  MAINSY  ................      0.01    3.05             0.00    2.82             0.01    4.12
     1  SYMFIT  ................      0.00    0.48             0.00    0.00             0.00    0.30
     1  CORORT  ................      0.00    0.20             0.00    0.00             0.00    0.57
     1  SYMORB  ................      0.00    0.38             0.00    0.00             0.00    0.24
     1  FITINT  ................      0.01    3.09             0.00    0.00             0.01    2.44
     1  CLSMAT  ................      0.00    0.15             0.00    0.00             0.00    0.46
     1  ORTHON  ................      0.00    0.12             0.00    2.71             0.00    0.69
     1  GENPT   ................      0.00    1.83             0.00    8.17             0.01    2.78
     1  PTBAS   ................      0.00    1.53             0.00    0.99             0.00    1.48
     8  FOCKY   ................      0.02   64.57             0.00   15.25             0.02   42.71
     8  FOCKTR  ................      0.00    1.85             0.00    0.32             0.00    1.18
     8  SDIIS   ................      0.00    4.06             0.00    2.30             0.00    6.81
     1  COREPS  ................      0.01    4.90             0.00    1.74             0.01    3.23
     1  POPAN   ................      0.00    1.45             0.00    0.00             0.00    1.38
     1  DEBYE   ................      0.00    0.21             0.00    0.00             0.00    0.49
     1  EXIT PROCEDURE .........      0.01    6.40             0.00    0.00             0.01    4.71


 Currently Open Files (EXIT00)
 ====================

 Unit    Access Format  Status   Type       Ident (file)
 -------------------------------------------------------
   3      SEQ    FORM   TRANSP  NORMAL      LOGFILE
                                          ( logfile )


 Buffered I/O statistics
 =======================
 Memory available:                     67108864
 Number of records fitting in memory:     16131
 Input :   0.2% of                        19554  *4k bytes
 Output:  17.6% of                         1157  *4k bytes
 Records from serial files evicted:           0
                    others evicted:           0
 Hash table lookups:      50265 with          0 conflicts (  0.00%)

 ***************************************************************************************************
 (LOGFILE)
 <Dec12-2020> <05:11:27>  DIRAC 2017  RunTime: Dec12-2020 05:11:27  Nodes: 1  Procs: 1
 <Dec12-2020> <05:11:27>  NORMAL TERMINATION
 <Dec12-2020> <05:11:27>  END
 <Dec12-2020> <05:11:28>  ADF 2017  RunTime: Dec12-2020 05:11:28  Nodes: 1  Procs: 1
 <Dec12-2020> <05:11:28>  Hydrogen (TZ2P)
 <Dec12-2020> <05:11:28>  RunType   : CREATE
 <Dec12-2020> <05:11:28>  Net Charge: 0 (Nuclei minus Electrons)
 <Dec12-2020> <05:11:28>  Symmetry  : ATOM
  Coordinates
    Atom         X           Y           Z   (Angstrom)
    1.H         0.000000    0.000000    0.000000
 <Dec12-2020> <05:11:28>  >>>> CORORT
 <Dec12-2020> <05:11:28>  >>>> FITINT
 <Dec12-2020> <05:11:28>  >>>> CLSMAT
 <Dec12-2020> <05:11:28>  >>>> ORTHON
 <Dec12-2020> <05:11:28>  >>>> GENPT
 <Dec12-2020> <05:11:28>  Block Length=  64
 <Dec12-2020> <05:11:28>  >>>> PTBAS
 <Dec12-2020> <05:11:28>  >>>> CYCLE
 <Dec12-2020> <05:11:28>              |Error|         MaxErr       Wt(A-DIIS)
 <Dec12-2020> <05:11:28>      1      0.00000000      0.00000000
 <Dec12-2020> <05:11:28>      2      0.03155047      0.03012130
 <Dec12-2020> <05:11:28>      3      0.00862036      0.00834572    100.0
 <Dec12-2020> <05:11:28>      4      0.00173320      0.00171953      0.7
 <Dec12-2020> <05:11:28>      5      0.00004372      0.00003982      0.0
 <Dec12-2020> <05:11:28>      6      0.00000239      0.00000216      0.0
 <Dec12-2020> <05:11:28>      7      0.00000001      0.00000001      0.0
 <Dec12-2020> <05:11:28>  SCF converged
 <Dec12-2020> <05:11:28>      8      0.00000000      0.00000000      0.0
 <Dec12-2020> <05:11:28>  >>>> POPAN
 <Dec12-2020> <05:11:28>  >>>> DEBYE
 <Dec12-2020> <05:11:28>  NORMAL TERMINATION
 <Dec12-2020> <05:11:28>  END
NORMAL TERMINATION

 *******************************************************************************
 *                                                                             *
 *  -------------------------------------                                      *
 *   Amsterdam Density Functional  (ADF)         2017                          *
 *  -------------------------------------                                      *
 *                                               r58813 2017-04-12             *
 *                                                                             *
 *                                                                             *
 *                            =====================                            *
 *                            |                   |                            *
 *                            |     D I R A C     |                            *
 *                            |                   |                            *
 *                            =====================                            *
 *                                                                             *
 *                                                                             *
 *   Online information and documentation:  https://www.scm.com/support/       *
 *   E-mail:  support@scm.com   info@scm.com                                   *
 *                                                                             *
 *   Scientific publications using ADF results must be properly referenced     *
 *   See the User Manuals (or the web site) for recommended citations          *
 *   The terms and conditions of the End User License Agreement apply to       *
 *   the use of ADF, https://www.scm.com/license-terms/                        *
 *                                                                             *
 **********************  x86_64_linux_intel / intelmpi  ************************
 
 Licensed to: SURF-SARA, Comp. & Networking Services / Amsterdam / NL
 SCM User ID: u7409
  
 DIRAC 2017  RunTime: Dec12-2020 05:11:28  Nodes: 1  Procs: 1

 Temporary files are created in /scratch/kid_0.051USB

1
 OXYGEN ATOM all electron RELATIVISTIC, Point Nuc, A and c fr
 N J RN H ZN XION ANUC CLIGHT
 5000    4100.00000000197.36710137  8.00000000  0.00000000   15.994914  0.1370360E+03
  PH   PHI     EPS        DEL        DELRVR
  0.30  0.30     2500.00  0.00001000  0.00001000
 IDIRC  NC1  NDEBU NPRIN  IPUN IRCOR IWCOR
   1   300     0     0     0     0     0
   XALPHA      XLATTER      RNUC
  0.70000000  0.00000000  0.00000000 Point Charge
   XN   XL   XJ      XE          XZ      XDELL
  1.0  0.0  0.5      -5.000       2.000     0.00000
  2.0  0.0  0.5      -1.000       2.000     0.00000
  2.0  1.0  0.5      -1.000       2.000     0.00000
  2.0  1.0  1.5      -1.000       2.000     0.00000
 ICORP=  0  NPCL=  0  DEMP=0.00  PEPS=0.000000
 R(1)=  0.1000000E-08 D=  0.1005080E+01 RNUC=  0.0000000E+00
 converged at cycle   28  DENSITY AVERAGING    0.2400
  MAXIMUM ERROR IN R.V(R) IS   0.81125670E-05
 Q,EY,EV,EZ,ESUM,ETOT,RHO  0.800000E+01 -0.101247E+02 -0.114961E+03 -0.177573E+03 -0.405053E+02 -0.743427E+02  0.414766E-14


 DIRAC CALCULATION
1                    OXYGEN ATOM all electron RELATIVISTIC, Point Nuc, A and c from libtc


 EXCHANGE COEFFICIENT=  0.7000000           TAIL CORRECTION=  0.           NUCLEAR RADIUS=  0.000E+00
0                       ORBITAL    N    L    J     ELECTRONS     EIGENVALUE                DELTA OF EIGENV.

                          1S1/2  1.0  0.0  0.5     2.000       -0.1880014E+02                 0.7264359E-06
                          2S1/2  2.0  0.0  0.5     2.000       -0.8412236E+00                 0.5932752E-05
                          2P1/2  2.0  1.0  0.5     2.000       -0.3063203E+00                 0.5998471E-05
                          2P3/2  2.0  1.0  1.5     2.000       -0.3049609E+00                 0.5986971E-05


                                        NUCLEAR CHARGE=    8.000000
                            INTEGRAL OF CHARGE DENSITY=    8.000000
                           SUM OF THE ORBITAL ENERGIES=    -40.5053
                                          TOTAL ENERGY=    -74.3427
                                        KINETIC ENERGY=     74.4552
                             NUCLEAR ATTRACTION ENERGY=   -177.5730
                             ELECTRON REPULSION ENERGY=     36.3686
                                       EXCHANGE ENERGY=     -7.5935

 *******************************************************************************

                             D I R A C   E X I T
 NORMAL TERMINATION


 =================
 Timing Statistics
 =================
  
 Total Used :                     CPU=        0.06      System=        0.01     Elapsed=        0.09

 Calls  Section                     ( Mean, Percentage )
 ---------------------------------------------------------------------------------------------------
     2  ><      ................      0.00    0.01             0.00    0.05             0.00    0.01
     1  EXIT PROCEDURE .........      0.06   99.99             0.01   99.95             0.09   99.99


 Currently Open Files (EXIT00)
 ====================

 Unit    Access Format  Status   Type       Ident (file)
 -------------------------------------------------------
   3      SEQ    FORM   TRANSP  NORMAL      LOGFILE
                                          ( logfile )


 Buffered I/O statistics
 =======================
 Memory available:                     67108864
 Number of records fitting in memory:     16131
 Input : 100.0% of                            0  *4k bytes
 Output: 100.0% of                            0  *4k bytes
 Records from serial files evicted:           0
                    others evicted:           0
 Hash table lookups:          0 with          0 conflicts (100.00%)
NORMAL TERMINATION

Create O   file=TZ2P-O
XC
  GGA PBE
End
relativistic ZORA
HartreeFock
Corepotentials t12.rel
End Input

 *******************************************************************************
 *                                                                             *
 *  -------------------------------------                                      *
 *   Amsterdam Density Functional  (ADF)         2017                          *
 *  -------------------------------------                                      *
 *                                               r58813 2017-04-12             *
 *                                                                             *
 *                                                                             *
 *                              =================                              *
 *                              |               |                              *
 *                              |     A D F     |                              *
 *                              |               |                              *
 *                              =================                              *
 *                                                                             *
 *                                                                             *
 *   Online information and documentation:  https://www.scm.com/support/       *
 *   E-mail:  support@scm.com   info@scm.com                                   *
 *                                                                             *
 *   Scientific publications using ADF results must be properly referenced     *
 *   See the User Manuals (or the web site) for recommended citations          *
 *   The terms and conditions of the End User License Agreement apply to       *
 *   the use of ADF, https://www.scm.com/license-terms/                        *
 *                                                                             *
 **********************  x86_64_linux_intel / intelmpi  ************************
 
 Licensed to: SURF-SARA, Comp. & Networking Services / Amsterdam / NL
 SCM User ID: u7409
  
 ADF 2017  RunTime: Dec12-2020 05:11:28  Nodes: 1  Procs: 1

 Temporary files are created in /scratch/kid_0.Te037M

 Oxygen (TZ2P)


 ===========================
 A T T A C H E D   F I L E S
 ===========================
  
 CREATE - Data File:    TZ2P-O
                        Oxygen (TZ2P)
 Core Potentials:
         file : t12.rel


 ===============================
 M O D E L   P A R A M E T E R S
 ===============================
  
 DENSITY FUNCTIONAL POTENTIAL (scf)
    LDA:                               PW92                                    == Not Default ==
    Gradient Corrections:              PBEc PBEx                               == Not Default ==

 SPIN  (restricted / unrestr.)
    Molecule:                          Restricted                               

 OTHER ASPECTS
    Relativistic Corrections:          scalar (ZORA,MAPA)                      == Not Default ==

    Nuclear Charge Density Model:      Point Charge Nuclei                      
    Core Treatment:                    Frozen Orbital(s)                        

    Hyperfine or Zeeman Interaction:   ---                                      


 =====================================
 S Y M M E T R Y ,   E L E C T R O N S
 =====================================
  
 Symmetry: ATOM

 Irreducible Representations, including subspecies
 -------------------------------------------------
 S
 P:x  P:y  P:z
 D:z2  D:x2-y2  D:xy  D:xz  D:yz
 F:z3  F:z  F:xyz  F:z2x  F:z2y  F:x  F:y


 Configuration of Valence Electrons
 ==================================

          Occupation Numbers
          -------------------------------------------------
 S        2*2
 P        4
 D        0
 F        0
          -------------------------------------------------

 Total:   8

 Net Charge: 0 (Nuclei minus Electrons)

 Preset values for MO occupations will be applied through SCF cycle no. 1000000
 Thereafter, the program will assign electrons to MOs that are spatially
 similar to the occupied MOs in a "reference" cycle ("KeepOrbitals").
 The reference cycle is always the PREVIOUS cycle: it will evolve with
 the SCF procedure.


 ================================
 (Slater-type)  F U N C T I O N S  ***  (Basis and Fit)  ***
 ================================
  

 Atom Type    1  (O)
 ==============

 Valence Basis Sets:  10
 -----------------------
   1 S    9.800000
   1 S    6.800000
   2 S    7.580000
   2 S    2.880000
   2 S    1.720000
   2 P    4.080000
   2 P    2.080000
   2 P    1.120000
   3 D    2.000000
   4 F    3.000000


 BAS: List of all Elementary Cartesian Basis Functions
 =====================================================

 The numbering in the list below (to the right of the function characteristics) is referred
 to in print-outs of MO eigenvectors and Mulliken populations in the BAS representation
 (as contrasted to the SFO representation).

 Notes:
 1. The functions are characterized by a polynomial prefactor (powers of x,y,z and r) and
    an exponential decay factor alpha.
 2. Since the basis sets are specific for an atom TYPE, the individual functions occur on
    all atoms of that type.
 3. The word 'Core' in the left margin signals that it is a Core Function (CF) : not a
    degree of freedom in the valence set, but only used to ensure orthogonalization of
    the other valence basis functions on the frozen Core Orbitals.


 (power of) X  Y  Z  R     Alpha  on Atom
            ==========     =====     ==========

 O                                    1
                                  ---------------------------------------------------------------------------
            0  0  0  0     9.800      1
            0  0  0  0     6.800      2
            0  0  0  1     7.580      3
            0  0  0  1     2.880      4
            0  0  0  1     1.720      5
            1  0  0  0     4.080      6
            0  1  0  0     4.080      7
            0  0  1  0     4.080      8
            1  0  0  0     2.080      9
            0  1  0  0     2.080     10
            0  0  1  0     2.080     11
            1  0  0  0     1.120     12
            0  1  0  0     1.120     13
            0  0  1  0     1.120     14
            2  0  0  0     2.000     15
            1  1  0  0     2.000     16
            1  0  1  0     2.000     17
            0  2  0  0     2.000     18
            0  1  1  0     2.000     19
            0  0  2  0     2.000     20
            3  0  0  0     3.000     21
            2  1  0  0     3.000     22
            2  0  1  0     3.000     23
            1  2  0  0     3.000     24
            1  1  1  0     3.000     25
            1  0  2  0     3.000     26
            0  3  0  0     3.000     27
            0  2  1  0     3.000     28
            0  1  2  0     3.000     29
            0  0  3  0     3.000     30

 Total number of charge fitting functions (nprimf)        84
 Total number of Cartesian basis functions (naos)         30
 Total number of Cartesian core functions  (ncos)          0


 BAS: List of all Elementary Cartesian Basis Functions
 =====================================================

 The numbering in the list below (to the right of the function characteristics) is referred
 to in print-outs of MO eigenvectors and Mulliken populations in the BAS representation
 (as contrasted to the SFO representation).

 Notes:
 1. The functions are characterized by a polynomial prefactor (powers of x,y,z and r) and
    an exponential decay factor alpha.
 2. Since the basis sets are specific for an atom TYPE, the individual functions occur on
    all atoms of that type.
 3. The word 'Core' in the left margin signals that it is a Core Function (CF) : not a
    degree of freedom in the valence set, but only used to ensure orthogonalization of
    the other valence basis functions on the frozen Core Orbitals.


 (power of) X  Y  Z  R     Alpha  on Atom
            ==========     =====     ==========

 O                                    1
                                  ---------------------------------------------------------------------------
            0  0  0  0     9.800      1
            0  0  0  0     6.800      2
            0  0  0  1     7.580      3
            0  0  0  1     2.880      4
            0  0  0  1     1.720      5
            1  0  0  0     4.080      6
            0  1  0  0     4.080      7
            0  0  1  0     4.080      8
            1  0  0  0     2.080      9
            0  1  0  0     2.080     10
            0  0  1  0     2.080     11
            1  0  0  0     1.120     12
            0  1  0  0     1.120     13
            0  0  1  0     1.120     14
            2  0  0  0     2.000     15
            1  1  0  0     2.000     16
            1  0  1  0     2.000     17
            0  2  0  0     2.000     18
            0  1  1  0     2.000     19
            0  0  2  0     2.000     20
            3  0  0  0     3.000     21
            2  1  0  0     3.000     22
            2  0  1  0     3.000     23
            1  2  0  0     3.000     24
            1  1  1  0     3.000     25
            1  0  2  0     3.000     26
            0  3  0  0     3.000     27
            0  2  1  0     3.000     28
            0  1  2  0     3.000     29
            0  0  3  0     3.000     30
1
 ***************************************************************************************************


                                              ***********************
                                              *  T E C H N I C A L  *
                                              ***********************
  


 =============================================================
 P A R A L L E L I Z A T I O N  and  V E C T O R I Z A T I O N
 =============================================================
  
 Nr of parallel processes:                                1
 Maximum vector length in NumInt loops:                 128

 IO buffersize (Mb):                                     64.000000


 =====================
 S C F   U P D A T E S
 =====================
  
 Max. nr. of cycles:                               300
 Convergence criterion:                              0.0000000100
   secondary criterion:                              0.0000000100

 Mix parameter (when DIIS does not apply):           0.2000000000
 Special mix parameter for the first cycle:          1.0000000000
 Mixed ADIIS+DIIS will be used
    Max number of expansion vectors:                10
    Pure ADIIS when Max([F,P]) is above              0.1000000000
    Pure DIIS when Max([F,P]) is below               0.0010000000
 Automatic ElectronSmearing (in case of problematic SCF convergence) disabled


 =================
 P R E C I S I O N  ***  (General: NumInt, NeglectFunctionTails, ...)  ***
 =================
  

 NumInt:           Target precision:                12.0000000000
 -------           Initial precision:               10.0000000000
                   Min. precision (optimization):   10.0000000000

 Neglect Functions:          Basis functions:        0.1000000000E-13
 ------------------          Fit functions:          0.1000000000E-13


 ===========================
 L I N E A R   S C A L I N G
 ===========================
  

 Cut-off radii density fit:                        0.1000000000E-97
 Overlap cut-off criterion AO matrix elements:     0.1000000000E-97
 Cut-offs for Coulomb potential and fitted density:0.1000000000E-97
 Cut-off criterion for Coulomb multipole terms:    0.1000000000E-97
 Progressive Convergence parameter:                 0.000000000    
1
 ***************************************************************************************************


                                            ***************************
                                            *  C O M P U T A T I O N  *
                                            ***************************
  

 Number of elements of the density matrix on this node (used, total):       465       465


 ===========================================
 Numerical Integration : Fuzzy Cells (Becke)
 ===========================================
  
 Becke grid quality: VERYGOOD       
  
 Lebedev angular grid order:             min:  13 max:  41
 Nr. of radial points:                   min:  68 max:  68

 Total nr. of points:         68
 Nr. of blocks:                1
 Block length:                68
 Nr. of dummy points:          0


 Test of Precision of the Numerical Integration Grid
 ===================================================

 Integral of the Total Core Density:                   0.00000000000000


 ========================
 Density Fitting (zlmFit)
 ========================
  
 ZlmFit Fit Quality: VERYGOOD       
  
 Max L-expansion:                        min:   0 max:   0
 Nr. of radial interpolation points:     min: 180 max: 180


 =====
 S C F  ***  ScaSCF  ***
 =====
  

 CYCLE    1
 SCF Error: norm([F,P])=      0.000000000000, max([F,P])=      0.000000000000
 orbitals (Q,E):
 ---------------
 S :1...5            ( 2.00   -32.0157)  ( 2.00    -7.9419)  ( 0.00    -3.4652)  ( 0.00     4.2896)
                     ( 0.00   109.0744)
 P :1...3            ( 4.00    -8.0011)  ( 0.00    -3.4871)  ( 0.00    -1.8916)
 D :1...1            ( 0.00    -3.3333)
 F :1...1            ( 0.00    -1.5001)

 CYCLE    2
  SDIIS (wt  0.000):  1.0000 -0.0000
 A-DIIS (wt  1.000):  0.0000  1.0000
  DIIS coefficients:  0.0000  1.0000
 SCF Error: norm([F,P])=      8.793317839064, max([F,P])=      5.532923201920
 orbitals (Q,E):
 ---------------
 S :1...3            ( 2.00   -14.5314)  ( 2.00     0.0217)  ( 0.00     1.8292)
 P :1...2            ( 4.00     0.2457)  ( 0.00     1.2348)
 D :1...1            ( 0.00     1.5788)
 F :1...1            ( 0.00     3.9810)

 CYCLE    3
  SDIIS (wt  0.000):  0.2252  0.7748
 A-DIIS (wt  1.000):  0.3116  0.6884
  DIIS coefficients:  0.3116  0.6884
 SCF Error: norm([F,P])=      3.552092106639, max([F,P])=      2.506991696998
 orbitals (Q,E):
 ---------------
 S :1...3            ( 2.00   -19.8037)  ( 2.00    -1.5267)  ( 0.00     0.4003)
 P :1...2            ( 4.00    -0.9798)  ( 0.00     0.1275)
 D :1...1            ( 0.00     0.6570)
 F :1...1            ( 0.00     2.8663)

 CYCLE    4
  SDIIS (wt  0.000): -0.0485  0.1722  0.8763
 A-DIIS (wt  1.000):  0.0000  0.0000  1.0000
  DIIS coefficients:  0.0000  0.0000  1.0000
 SCF Error: norm([F,P])=      1.186400285312, max([F,P])=      0.598203866081
 orbitals (Q,E):
 ---------------
 S :1...3            ( 2.00   -18.0177)  ( 2.00    -0.5481)  ( 0.00     1.0428)
 P :1...2            ( 4.00    -0.0407)  ( 0.00     0.5430)
 D :1...1            ( 0.00     1.2478)
 F :1...1            ( 0.00     3.5719)

 CYCLE    5
  SDIIS (wt  0.000): -0.0198 -0.0845  0.5648  0.5395
 A-DIIS (wt  1.000):  0.0000  0.0000  0.6214  0.3786
  DIIS coefficients:  0.0000  0.0000  0.6214  0.3786
 SCF Error: norm([F,P])=      1.467725689533, max([F,P])=      0.818577363889
 orbitals (Q,E):
 ---------------
 S :1...3            ( 2.00   -18.8197)  ( 2.00    -0.8638)  ( 0.00     0.8067)
 P :1...2            ( 4.00    -0.3145)  ( 0.00     0.3640)
 D :1...1            ( 0.00     1.0692)
 F :1...1            ( 0.00     3.3561)

 CYCLE    6
  SDIIS (wt  0.149):  0.0037 -0.0019  0.0499 -0.0369  0.9853
 A-DIIS (wt  0.851):  0.0000  0.0000  0.0000  0.0000  1.0000
  DIIS coefficients:  0.0005 -0.0003  0.0074 -0.0055  0.9978
 SCF Error: norm([F,P])=      0.142992517789, max([F,P])=      0.085258187544
 orbitals (Q,E):
 ---------------
 S :1...3            ( 2.00   -18.9955)  ( 2.00    -0.9126)  ( 0.00     0.7748)
 P :1...2            ( 4.00    -0.3625)  ( 0.00     0.3405)
 D :1...1            ( 0.00     1.0512)
 F :1...1            ( 0.00     3.3328)

 CYCLE    7
  SDIIS (wt  0.300): -0.0003  0.0000 -0.0125  0.0179  0.3033  0.6916
 A-DIIS (wt  0.700):  0.0000  0.0000  0.0000  0.0000  0.4767  0.5233
  DIIS coefficients: -0.0001  0.0000 -0.0037  0.0054  0.4248  0.5737
 SCF Error: norm([F,P])=      0.122685051133, max([F,P])=      0.070349314819
 orbitals (Q,E):
 ---------------
 S :1...3            ( 2.00   -18.9129)  ( 2.00    -0.8805)  ( 0.00     0.7958)
 P :1...2            ( 4.00    -0.3314)  ( 0.00     0.3535)
 D :1...1            ( 0.00     1.0678)
 F :1...1            ( 0.00     3.3529)

 CYCLE    8
  SDIIS (wt  0.999): -0.0000  0.0002  0.0031 -0.0028 -0.0102 -0.0489  1.0586
 A-DIIS (wt  0.001):  0.0000  0.0000  0.0000  0.0000  0.0000  0.0000  1.0000
  DIIS coefficients: -0.0000  0.0002  0.0031 -0.0028 -0.0102 -0.0489  1.0586
 SCF Error: norm([F,P])=      0.002323244436, max([F,P])=      0.001053744043
 orbitals (Q,E):
 ---------------
 S :1...3            ( 2.00   -18.9136)  ( 2.00    -0.8815)  ( 0.00     0.7952)
 P :1...2            ( 4.00    -0.3323)  ( 0.00     0.3530)
 D :1...1            ( 0.00     1.0672)
 F :1...1            ( 0.00     3.3522)

 CYCLE    9
  SDIIS (wt  1.000): -0.0000  0.0000  0.0001 -0.0000 -0.0002 -0.0012  0.0321  0.9692
  DIIS coefficients: -0.0000  0.0000  0.0001 -0.0000 -0.0002 -0.0012  0.0321  0.9692
 SCF Error: norm([F,P])=      0.000124650038, max([F,P])=      0.000065124834
 orbitals (Q,E):
 ---------------
 S :1...3            ( 2.00   -18.9135)  ( 2.00    -0.8814)  ( 0.00     0.7952)
 P :1...2            ( 4.00    -0.3323)  ( 0.00     0.3530)
 D :1...1            ( 0.00     1.0672)
 F :1...1            ( 0.00     3.3522)

 CYCLE   10
  SDIIS (wt  1.000):  0.0000  0.0000 -0.0000 -0.0000 -0.0000 -0.0013 -0.0142  1.0155
  DIIS coefficients:  0.0000  0.0000 -0.0000 -0.0000 -0.0000 -0.0013 -0.0142  1.0155
 SCF Error: norm([F,P])=      0.000001661077, max([F,P])=      0.000000867614
 orbitals (Q,E):
 ---------------
 S :1...3            ( 2.00   -18.9135)  ( 2.00    -0.8815)  ( 0.00     0.7952)
 P :1...2            ( 4.00    -0.3323)  ( 0.00     0.3530)
 D :1...1            ( 0.00     1.0672)
 F :1...1            ( 0.00     3.3522)

 CYCLE   11
  SDIIS (wt  1.000):  0.0000  0.0006 -0.0229  1.0224
  DIIS coefficients:  0.0000  0.0006 -0.0229  1.0224
 SCF Error: norm([F,P])=      0.000000038670, max([F,P])=      0.000000020401
 orbitals (Q,E):
 ---------------
 S :1...3            ( 2.00   -18.9135)  ( 2.00    -0.8815)  ( 0.00     0.7952)
 P :1...2            ( 4.00    -0.3323)  ( 0.00     0.3530)
 D :1...1            ( 0.00     1.0672)
 F :1...1            ( 0.00     3.3522)

 CYCLE   12
  SDIIS (wt  1.000):  0.0000 -0.0002  0.0092  0.9909
  DIIS coefficients:  0.0000 -0.0002  0.0092  0.9909
 SCF Error: norm([F,P])=      0.000000000195, max([F,P])=      0.000000000117
 orbitals (Q,E):
 ---------------
 S :1...3            ( 2.00   -18.9135)  ( 2.00    -0.8815)  ( 0.00     0.7952)
 P :1...2            ( 4.00    -0.3323)  ( 0.00     0.3530)
 D :1...1            ( 0.00     1.0672)
 F :1...1            ( 0.00     3.3522)

 SCF CONVERGED

 CYCLE   13
1
 ***************************************************************************************************


                                                *******************
                                                *  R E S U L T S  *
                                                *******************
  
  
 Hartree-Fock exchange energy:   -7.61452215177507     
 *** Setting up for NEW gradients in Focky
 *** Using FIT density in Focky

 Scaled ZORA Orbital Energies, per Irrep and Spin:
 =================================================
                        Occup              E (au)              E (eV)       Diff (eV) with prev. cycle
                        -----      --------------------        ------       --------------------------
 S
               1        2.000     -0.18913533563385E+02      -514.663               2.57E-10
               2        2.000     -0.88145005995936E+00       -23.985               1.66E-10
               3        0.000      0.79518653321380E+00        21.638
               4        0.000      0.13451744054023E+02       366.041
               5        0.000      0.12163768645271E+03      3309.930
 P
               1        4.000     -0.33230950183288E+00        -9.043               1.57E-10
               2        0.000      0.35303509398589E+00         9.607
               3        0.000      0.38372579488415E+01       104.417
 D
               1        0.000      0.10671903238138E+01        29.040
 F
               1        0.000      0.33522196652462E+01        91.219


 Partially Occupied:
               1 P                -0.33230950183288E+00
  
 HOMO :        2 S                -0.88145005995936E+00
 LUMO :        2 P                 0.35303509398589E+00
  


 Orbital Energies, all Irreps
 ========================================

 Irrep        no.  (spin)   Occup              E (au)                E (eV)
 ---------------------------------------------------------------------------
 S             1             2.00       -0.18913533563385E+02      -514.6634
 S             2             2.00       -0.88145005995936E+00       -23.9855
 P             1             4.00       -0.33230950183288E+00        -9.0426
 P             2             0.00        0.35303509398589E+00         9.6066
 S             3             0.00        0.79518653321380E+00        21.6381
 D             1             0.00        0.10671903238138E+01        29.0397
 F             1             0.00        0.33522196652462E+01        91.2185
 P             3             0.00        0.38372579488415E+01       104.4171
 S             4             0.00        0.13451744054023E+02       366.0406
 S             5             0.00        0.12163768645271E+03      3309.9299


 All Electron Calculation, thus no Orbital Energies of the Core Orbitals are calculated


 =======================================
 M U L L I K E N   P O P U L A T I O N S
 =======================================
  
 The survey below gives for each atom:
 a) the total charge (Z minus electrons)
 b) the net spin polarization (nr of electrons spin-A minus spin-B)
 c) for each spin the atomic electron valence density (integrated) per L-value.

 Atom              Charge    Spin density          S         P         D         F
 ----              ------    ------------       ------    ------    ------    ------
 1 O               0.0000                       4.0000    4.0000    0.0000    0.0000

 Populations of individual BAS functions
 ----------------------------------------
 1 O            0.6830  1.2735  0.0088  1.1505  0.8842  0.2473  0.2473  0.2473  0.7502  0.7502
                0.7502  0.3359  0.3359  0.3359  0.0000  0.0000  0.0000  0.0000  0.0000  0.0000
                0.0000  0.0000  0.0000  0.0000  0.0000  0.0000  0.0000  0.0000  0.0000  0.0000

 Gross Charges per Atom (Z minus electrons)
 ==========================================
             0.0000
 Net Total:  0.00000000


 =======================================================================
 Electrostatic potential at the Nuclei due to electrons and other nuclei
 =======================================================================
  
         Atom                  Potential
         ----                  ---------
     1)   O                  22.26074866
 
 
 ========================
 No memory problems found
 ========================
 
 Maximum number of active allocate calls:         480
 
 *******************************************************************************

                             A D F   E X I T
 NORMAL TERMINATION


 =================
 Timing Statistics
 =================
  
 Total Used :                     CPU=        0.34      System=        0.02     Elapsed=        0.42

 Calls  Section                     ( Mean, Percentage )
 ---------------------------------------------------------------------------------------------------
     3  ><      ................      0.00    0.12             0.00    1.29             0.00    0.74
     1  INIT    ................      0.01    2.03             0.01   42.54             0.03    6.01
     1  GEOMET  ................      0.01    1.54             0.00    5.03             0.01    2.93
     1  INPUTA  ................      0.00    0.51             0.00    0.00             0.00    0.56
     1  MAINSY  ................      0.01    1.95             0.00    2.69             0.01    3.08
     1  SYMFIT  ................      0.00    0.19             0.00    1.61             0.00    0.23
     1  CORORT  ................      0.00    0.08             0.00    0.67             0.00    0.44
     1  SYMORB  ................      0.00    0.19             0.00    1.57             0.00    0.23
     1  FITINT  ................      0.01    1.70             0.00   14.29             0.01    2.39
     1  CLSMAT  ................      0.00    0.08             0.00    0.63             0.00    0.42
     1  ORTHON  ................      0.00    0.36             0.00    0.72             0.00    0.60
     1  GENPT   ................      0.01    3.05             0.00    0.00             0.01    3.09
     1  PTBAS   ................      0.00    1.05             0.00    0.00             0.01    1.19
    13  FOCKY   ................      0.02   70.92             0.00   28.49             0.02   58.81
    13  FOCKTR  ................      0.00    2.27             0.00    0.00             0.00    1.82
    13  SDIIS   ................      0.00    4.63             0.00    0.46             0.00    8.46
     1  COREPS  ................      0.01    4.17             0.00    0.00             0.01    3.34
     1  POPAN   ................      0.00    1.11             0.00    0.00             0.01    1.24
     1  DEBYE   ................      0.00    0.14             0.00    0.00             0.00    0.39
     1  EXIT PROCEDURE .........      0.01    3.91             0.00    0.00             0.02    4.02


 Currently Open Files (EXIT00)
 ====================

 Unit    Access Format  Status   Type       Ident (file)
 -------------------------------------------------------
   3      SEQ    FORM   TRANSP  NORMAL      LOGFILE
                                          ( logfile )


 Buffered I/O statistics
 =======================
 Memory available:                     67108864
 Number of records fitting in memory:     16131
 Input :   0.1% of                        32852  *4k bytes
 Output:  15.2% of                         1529  *4k bytes
 Records from serial files evicted:           0
                    others evicted:           0
 Hash table lookups:      85281 with          0 conflicts (  0.00%)

 ***************************************************************************************************
 (LOGFILE)
 <Dec12-2020> <05:11:27>  DIRAC 2017  RunTime: Dec12-2020 05:11:27  Nodes: 1  Procs: 1
 <Dec12-2020> <05:11:27>  NORMAL TERMINATION
 <Dec12-2020> <05:11:27>  END
 <Dec12-2020> <05:11:28>  ADF 2017  RunTime: Dec12-2020 05:11:28  Nodes: 1  Procs: 1
 <Dec12-2020> <05:11:28>  Hydrogen (TZ2P)
 <Dec12-2020> <05:11:28>  RunType   : CREATE
 <Dec12-2020> <05:11:28>  Net Charge: 0 (Nuclei minus Electrons)
 <Dec12-2020> <05:11:28>  Symmetry  : ATOM
  Coordinates
    Atom         X           Y           Z   (Angstrom)
    1.H         0.000000    0.000000    0.000000
 <Dec12-2020> <05:11:28>  >>>> CORORT
 <Dec12-2020> <05:11:28>  >>>> FITINT
 <Dec12-2020> <05:11:28>  >>>> CLSMAT
 <Dec12-2020> <05:11:28>  >>>> ORTHON
 <Dec12-2020> <05:11:28>  >>>> GENPT
 <Dec12-2020> <05:11:28>  Block Length=  64
 <Dec12-2020> <05:11:28>  >>>> PTBAS
 <Dec12-2020> <05:11:28>  >>>> CYCLE
 <Dec12-2020> <05:11:28>              |Error|         MaxErr       Wt(A-DIIS)
 <Dec12-2020> <05:11:28>      1      0.00000000      0.00000000
 <Dec12-2020> <05:11:28>      2      0.03155047      0.03012130
 <Dec12-2020> <05:11:28>      3      0.00862036      0.00834572    100.0
 <Dec12-2020> <05:11:28>      4      0.00173320      0.00171953      0.7
 <Dec12-2020> <05:11:28>      5      0.00004372      0.00003982      0.0
 <Dec12-2020> <05:11:28>      6      0.00000239      0.00000216      0.0
 <Dec12-2020> <05:11:28>      7      0.00000001      0.00000001      0.0
 <Dec12-2020> <05:11:28>  SCF converged
 <Dec12-2020> <05:11:28>      8      0.00000000      0.00000000      0.0
 <Dec12-2020> <05:11:28>  >>>> POPAN
 <Dec12-2020> <05:11:28>  >>>> DEBYE
 <Dec12-2020> <05:11:28>  NORMAL TERMINATION
 <Dec12-2020> <05:11:28>  END
 <Dec12-2020> <05:11:28>  DIRAC 2017  RunTime: Dec12-2020 05:11:28  Nodes: 1  Procs: 1
 <Dec12-2020> <05:11:28>  NORMAL TERMINATION
 <Dec12-2020> <05:11:28>  END
 <Dec12-2020> <05:11:28>  ADF 2017  RunTime: Dec12-2020 05:11:28  Nodes: 1  Procs: 1
 <Dec12-2020> <05:11:28>  Oxygen (TZ2P)
 <Dec12-2020> <05:11:28>  RunType   : CREATE
 <Dec12-2020> <05:11:28>  Net Charge: 0 (Nuclei minus Electrons)
 <Dec12-2020> <05:11:28>  Symmetry  : ATOM
  Coordinates
    Atom         X           Y           Z   (Angstrom)
    1.O         0.000000    0.000000    0.000000
 <Dec12-2020> <05:11:28>  >>>> CORORT
 <Dec12-2020> <05:11:28>  >>>> FITINT
 <Dec12-2020> <05:11:28>  >>>> CLSMAT
 <Dec12-2020> <05:11:28>  >>>> ORTHON
 <Dec12-2020> <05:11:28>  >>>> GENPT
 <Dec12-2020> <05:11:28>  Block Length=  68
 <Dec12-2020> <05:11:28>  >>>> PTBAS
 <Dec12-2020> <05:11:28>  >>>> CYCLE
 <Dec12-2020> <05:11:28>              |Error|         MaxErr       Wt(A-DIIS)
 <Dec12-2020> <05:11:28>      1      0.00000000      0.00000000
 <Dec12-2020> <05:11:28>      2      8.79331784      5.53292320    100.0
 <Dec12-2020> <05:11:28>      3      3.55209211      2.50699170    100.0
 <Dec12-2020> <05:11:28>      4      1.18640029      0.59820387    100.0
 <Dec12-2020> <05:11:28>      5      1.46772569      0.81857736    100.0
 <Dec12-2020> <05:11:28>      6      0.14299252      0.08525819     85.1
 <Dec12-2020> <05:11:28>      7      0.12268505      0.07034931     70.0
 <Dec12-2020> <05:11:28>      8      0.00232324      0.00105374      0.1
 <Dec12-2020> <05:11:28>      9      0.00012465      0.00006512      0.0
 <Dec12-2020> <05:11:28>     10      0.00000166      0.00000087      0.0
 <Dec12-2020> <05:11:28>     11      0.00000004      0.00000002      0.0
 <Dec12-2020> <05:11:28>     12      0.00000000      0.00000000      0.0
 <Dec12-2020> <05:11:28>  SCF converged
 <Dec12-2020> <05:11:28>     13      0.00000000      0.00000000      0.0
 <Dec12-2020> <05:11:28>  >>>> POPAN
 <Dec12-2020> <05:11:28>  >>>> DEBYE
 <Dec12-2020> <05:11:28>  NORMAL TERMINATION
 <Dec12-2020> <05:11:28>  END
NORMAL TERMINATION

 *******************************************************************************
 *                                                                             *
 *  -------------------------------------                                      *
 *   Amsterdam Density Functional  (ADF)         2017                          *
 *  -------------------------------------                                      *
 *                                               r58813 2017-04-12             *
 *                                                                             *
 *                                                                             *
 *                            =====================                            *
 *                            |                   |                            *
 *                            |     D I R A C     |                            *
 *                            |                   |                            *
 *                            =====================                            *
 *                                                                             *
 *                                                                             *
 *   Online information and documentation:  https://www.scm.com/support/       *
 *   E-mail:  support@scm.com   info@scm.com                                   *
 *                                                                             *
 *   Scientific publications using ADF results must be properly referenced     *
 *   See the User Manuals (or the web site) for recommended citations          *
 *   The terms and conditions of the End User License Agreement apply to       *
 *   the use of ADF, https://www.scm.com/license-terms/                        *
 *                                                                             *
 **********************  x86_64_linux_intel / intelmpi  ************************
 
 Licensed to: SURF-SARA, Comp. & Networking Services / Amsterdam / NL
 SCM User ID: u7409
  
 DIRAC 2017  RunTime: Dec12-2020 05:11:29  Nodes: 1  Procs: 1

 Temporary files are created in /scratch/kid_0.S2RkQb

1
 CARBON ATOM all electron RELATIVISTIC, Point Nuc, A and c fr
 N J RN H ZN XION ANUC CLIGHT
 5000    4100.00000000197.36710137  6.00000000  0.00000000   12.000000  0.1370360E+03
  PH   PHI     EPS        DEL        DELRVR
  0.30  0.30     2500.00  0.00001000  0.00001000
 IDIRC  NC1  NDEBU NPRIN  IPUN IRCOR IWCOR
   1   300     0     0     0     0     0
   XALPHA      XLATTER      RNUC
  0.70000000  0.00000000  0.00000000 Point Charge
   XN   XL   XJ      XE          XZ      XDELL
  1.0  0.0  0.5      -5.000       2.000     0.00000
  2.0  0.0  0.5      -1.000       2.000     0.00000
  2.0  1.0  0.5      -1.000       2.000     0.00000
  2.0  1.0  1.5      -1.000       0.000     0.00000
 ICORP=  0  NPCL=  0  DEMP=0.00  PEPS=0.000000
 R(1)=  0.1000000E-08 D=  0.1005080E+01 RNUC=  0.0000000E+00
 converged at cycle   26  DENSITY AVERAGING    0.3000
  MAXIMUM ERROR IN R.V(R) IS   0.55010513E-05
 Q,EY,EV,EZ,ESUM,ETOT,RHO  0.600000E+01 -0.610129E+01 -0.585189E+02 -0.876464E+02 -0.211985E+02 -0.372876E+02  0.164808E-14


 DIRAC CALCULATION
1                    CARBON ATOM all electron RELATIVISTIC, Point Nuc, A and c from libtc


 EXCHANGE COEFFICIENT=  0.7000000           TAIL CORRECTION=  0.           NUCLEAR RADIUS=  0.000E+00
0                       ORBITAL    N    L    J     ELECTRONS     EIGENVALUE                DELTA OF EIGENV.

                          1S1/2  1.0  0.0  0.5     2.000       -0.9959611E+01                 0.1355092E-04
                          2S1/2  2.0  0.0  0.5     2.000       -0.4708542E+00                 0.1106918E-05
                          2P1/2  2.0  1.0  0.5     2.000       -0.1687896E+00                 0.8770186E-06
                          2P3/2  2.0  1.0  1.5     0.000       -0.1684646E+00                 0.8770830E-06


                                        NUCLEAR CHARGE=    6.000000
                            INTEGRAL OF CHARGE DENSITY=    6.000000
                           SUM OF THE ORBITAL ENERGIES=    -21.1985
                                          TOTAL ENERGY=    -37.2876
                                        KINETIC ENERGY=     37.3204
                             NUCLEAR ATTRACTION ENERGY=    -87.6464
                             ELECTRON REPULSION ENERGY=     17.6144
                                       EXCHANGE ENERGY=     -4.5760

 *******************************************************************************

                             D I R A C   E X I T
 NORMAL TERMINATION


 =================
 Timing Statistics
 =================
  
 Total Used :                     CPU=        0.07      System=        0.00     Elapsed=        0.08

 Calls  Section                     ( Mean, Percentage )
 ---------------------------------------------------------------------------------------------------
     2  ><      ................      0.00    0.02             0.00    0.07             0.00    0.02
     1  EXIT PROCEDURE .........      0.07   99.98             0.00   99.93             0.08   99.98


 Currently Open Files (EXIT00)
 ====================

 Unit    Access Format  Status   Type       Ident (file)
 -------------------------------------------------------
   3      SEQ    FORM   TRANSP  NORMAL      LOGFILE
                                          ( logfile )


 Buffered I/O statistics
 =======================
 Memory available:                     67108864
 Number of records fitting in memory:     16131
 Input : 100.0% of                            0  *4k bytes
 Output: 100.0% of                            0  *4k bytes
 Records from serial files evicted:           0
                    others evicted:           0
 Hash table lookups:          0 with          0 conflicts (100.00%)
NORMAL TERMINATION

Create C   file=TZ2P-C
XC
  GGA PBE
End
relativistic ZORA
HartreeFock
Corepotentials t12.rel
End Input

 *******************************************************************************
 *                                                                             *
 *  -------------------------------------                                      *
 *   Amsterdam Density Functional  (ADF)         2017                          *
 *  -------------------------------------                                      *
 *                                               r58813 2017-04-12             *
 *                                                                             *
 *                                                                             *
 *                              =================                              *
 *                              |               |                              *
 *                              |     A D F     |                              *
 *                              |               |                              *
 *                              =================                              *
 *                                                                             *
 *                                                                             *
 *   Online information and documentation:  https://www.scm.com/support/       *
 *   E-mail:  support@scm.com   info@scm.com                                   *
 *                                                                             *
 *   Scientific publications using ADF results must be properly referenced     *
 *   See the User Manuals (or the web site) for recommended citations          *
 *   The terms and conditions of the End User License Agreement apply to       *
 *   the use of ADF, https://www.scm.com/license-terms/                        *
 *                                                                             *
 **********************  x86_64_linux_intel / intelmpi  ************************
 
 Licensed to: SURF-SARA, Comp. & Networking Services / Amsterdam / NL
 SCM User ID: u7409
  
 ADF 2017  RunTime: Dec12-2020 05:11:29  Nodes: 1  Procs: 1

 Temporary files are created in /scratch/kid_0.VUsL1n

 Carbon (TZ2P)


 ===========================
 A T T A C H E D   F I L E S
 ===========================
  
 CREATE - Data File:    TZ2P-C
                        Carbon (TZ2P)
 Core Potentials:
         file : t12.rel


 ===============================
 M O D E L   P A R A M E T E R S
 ===============================
  
 DENSITY FUNCTIONAL POTENTIAL (scf)
    LDA:                               PW92                                    == Not Default ==
    Gradient Corrections:              PBEc PBEx                               == Not Default ==

 SPIN  (restricted / unrestr.)
    Molecule:                          Restricted                               

 OTHER ASPECTS
    Relativistic Corrections:          scalar (ZORA,MAPA)                      == Not Default ==

    Nuclear Charge Density Model:      Point Charge Nuclei                      
    Core Treatment:                    Frozen Orbital(s)                        

    Hyperfine or Zeeman Interaction:   ---                                      


 =====================================
 S Y M M E T R Y ,   E L E C T R O N S
 =====================================
  
 Symmetry: ATOM

 Irreducible Representations, including subspecies
 -------------------------------------------------
 S
 P:x  P:y  P:z
 D:z2  D:x2-y2  D:xy  D:xz  D:yz
 F:z3  F:z  F:xyz  F:z2x  F:z2y  F:x  F:y


 Configuration of Valence Electrons
 ==================================

          Occupation Numbers
          -------------------------------------------------
 S        2*2
 P        2
 D        0
 F        0
          -------------------------------------------------

 Total:   6

 Net Charge: 0 (Nuclei minus Electrons)

 Preset values for MO occupations will be applied through SCF cycle no. 1000000
 Thereafter, the program will assign electrons to MOs that are spatially
 similar to the occupied MOs in a "reference" cycle ("KeepOrbitals").
 The reference cycle is always the PREVIOUS cycle: it will evolve with
 the SCF procedure.


 ================================
 (Slater-type)  F U N C T I O N S  ***  (Basis and Fit)  ***
 ================================
  

 Atom Type    1  (C)
 ==============

 Valence Basis Sets:  10
 -----------------------
   1 S    7.680000
   1 S    5.000000
   2 S    1.280000
   2 S    2.100000
   2 S    4.600000
   2 P    0.820000
   2 P    1.480000
   2 P    2.940000
   3 D    2.200000
   4 F    3.300000


 BAS: List of all Elementary Cartesian Basis Functions
 =====================================================

 The numbering in the list below (to the right of the function characteristics) is referred
 to in print-outs of MO eigenvectors and Mulliken populations in the BAS representation
 (as contrasted to the SFO representation).

 Notes:
 1. The functions are characterized by a polynomial prefactor (powers of x,y,z and r) and
    an exponential decay factor alpha.
 2. Since the basis sets are specific for an atom TYPE, the individual functions occur on
    all atoms of that type.
 3. The word 'Core' in the left margin signals that it is a Core Function (CF) : not a
    degree of freedom in the valence set, but only used to ensure orthogonalization of
    the other valence basis functions on the frozen Core Orbitals.


 (power of) X  Y  Z  R     Alpha  on Atom
            ==========     =====     ==========

 C                                    1
                                  ---------------------------------------------------------------------------
            0  0  0  0     7.680      1
            0  0  0  0     5.000      2
            0  0  0  1     1.280      3
            0  0  0  1     2.100      4
            0  0  0  1     4.600      5
            1  0  0  0     0.820      6
            0  1  0  0     0.820      7
            0  0  1  0     0.820      8
            1  0  0  0     1.480      9
            0  1  0  0     1.480     10
            0  0  1  0     1.480     11
            1  0  0  0     2.940     12
            0  1  0  0     2.940     13
            0  0  1  0     2.940     14
            2  0  0  0     2.200     15
            1  1  0  0     2.200     16
            1  0  1  0     2.200     17
            0  2  0  0     2.200     18
            0  1  1  0     2.200     19
            0  0  2  0     2.200     20
            3  0  0  0     3.300     21
            2  1  0  0     3.300     22
            2  0  1  0     3.300     23
            1  2  0  0     3.300     24
            1  1  1  0     3.300     25
            1  0  2  0     3.300     26
            0  3  0  0     3.300     27
            0  2  1  0     3.300     28
            0  1  2  0     3.300     29
            0  0  3  0     3.300     30

 Total number of charge fitting functions (nprimf)        84
 Total number of Cartesian basis functions (naos)         30
 Total number of Cartesian core functions  (ncos)          0


 BAS: List of all Elementary Cartesian Basis Functions
 =====================================================

 The numbering in the list below (to the right of the function characteristics) is referred
 to in print-outs of MO eigenvectors and Mulliken populations in the BAS representation
 (as contrasted to the SFO representation).

 Notes:
 1. The functions are characterized by a polynomial prefactor (powers of x,y,z and r) and
    an exponential decay factor alpha.
 2. Since the basis sets are specific for an atom TYPE, the individual functions occur on
    all atoms of that type.
 3. The word 'Core' in the left margin signals that it is a Core Function (CF) : not a
    degree of freedom in the valence set, but only used to ensure orthogonalization of
    the other valence basis functions on the frozen Core Orbitals.


 (power of) X  Y  Z  R     Alpha  on Atom
            ==========     =====     ==========

 C                                    1
                                  ---------------------------------------------------------------------------
            0  0  0  0     7.680      1
            0  0  0  0     5.000      2
            0  0  0  1     1.280      3
            0  0  0  1     2.100      4
            0  0  0  1     4.600      5
            1  0  0  0     0.820      6
            0  1  0  0     0.820      7
            0  0  1  0     0.820      8
            1  0  0  0     1.480      9
            0  1  0  0     1.480     10
            0  0  1  0     1.480     11
            1  0  0  0     2.940     12
            0  1  0  0     2.940     13
            0  0  1  0     2.940     14
            2  0  0  0     2.200     15
            1  1  0  0     2.200     16
            1  0  1  0     2.200     17
            0  2  0  0     2.200     18
            0  1  1  0     2.200     19
            0  0  2  0     2.200     20
            3  0  0  0     3.300     21
            2  1  0  0     3.300     22
            2  0  1  0     3.300     23
            1  2  0  0     3.300     24
            1  1  1  0     3.300     25
            1  0  2  0     3.300     26
            0  3  0  0     3.300     27
            0  2  1  0     3.300     28
            0  1  2  0     3.300     29
            0  0  3  0     3.300     30
1
 ***************************************************************************************************


                                              ***********************
                                              *  T E C H N I C A L  *
                                              ***********************
  


 =============================================================
 P A R A L L E L I Z A T I O N  and  V E C T O R I Z A T I O N
 =============================================================
  
 Nr of parallel processes:                                1
 Maximum vector length in NumInt loops:                 128

 IO buffersize (Mb):                                     64.000000


 =====================
 S C F   U P D A T E S
 =====================
  
 Max. nr. of cycles:                               300
 Convergence criterion:                              0.0000000100
   secondary criterion:                              0.0000000100

 Mix parameter (when DIIS does not apply):           0.2000000000
 Special mix parameter for the first cycle:          1.0000000000
 Mixed ADIIS+DIIS will be used
    Max number of expansion vectors:                10
    Pure ADIIS when Max([F,P]) is above              0.1000000000
    Pure DIIS when Max([F,P]) is below               0.0010000000
 Automatic ElectronSmearing (in case of problematic SCF convergence) disabled


 =================
 P R E C I S I O N  ***  (General: NumInt, NeglectFunctionTails, ...)  ***
 =================
  

 NumInt:           Target precision:                12.0000000000
 -------           Initial precision:               10.0000000000
                   Min. precision (optimization):   10.0000000000

 Neglect Functions:          Basis functions:        0.1000000000E-13
 ------------------          Fit functions:          0.1000000000E-13


 ===========================
 L I N E A R   S C A L I N G
 ===========================
  

 Cut-off radii density fit:                        0.1000000000E-97
 Overlap cut-off criterion AO matrix elements:     0.1000000000E-97
 Cut-offs for Coulomb potential and fitted density:0.1000000000E-97
 Cut-off criterion for Coulomb multipole terms:    0.1000000000E-97
 Progressive Convergence parameter:                 0.000000000    
1
 ***************************************************************************************************


                                            ***************************
                                            *  C O M P U T A T I O N  *
                                            ***************************
  

 Number of elements of the density matrix on this node (used, total):       465       465


 ===========================================
 Numerical Integration : Fuzzy Cells (Becke)
 ===========================================
  
 Becke grid quality: VERYGOOD       
  
 Lebedev angular grid order:             min:  13 max:  41
 Nr. of radial points:                   min:  72 max:  72

 Total nr. of points:         72
 Nr. of blocks:                1
 Block length:                72
 Nr. of dummy points:          0


 Test of Precision of the Numerical Integration Grid
 ===================================================

 Integral of the Total Core Density:                   0.00000000000000


 ========================
 Density Fitting (zlmFit)
 ========================
  
 ZlmFit Fit Quality: VERYGOOD       
  
 Max L-expansion:                        min:   0 max:   0
 Nr. of radial interpolation points:     min: 160 max: 160


 =====
 S C F  ***  ScaSCF  ***
 =====
  

 CYCLE    1
 SCF Error: norm([F,P])=      0.000000000000, max([F,P])=      0.000000000000
 orbitals (Q,E):
 ---------------
 S :1...5            ( 2.00   -18.0043)  ( 2.00    -4.4778)  ( 0.00    -1.9487)  ( 0.00     0.6764)
                     ( 0.00    42.5219)
 P :1...3            ( 2.00    -4.5000)  ( 0.00    -1.9811)  ( 0.00    -1.0851)
 D :1...1            ( 0.00    -1.9800)
 F :1...1            ( 0.00     0.4946)

 CYCLE    2
  SDIIS (wt  0.000):  1.0000  0.0000
 A-DIIS (wt  1.000):  0.0000  1.0000
  DIIS coefficients:  0.0000  1.0000
 SCF Error: norm([F,P])=      4.504248014088, max([F,P])=      3.336725253580
 orbitals (Q,E):
 ---------------
 S :1...3            ( 2.00    -7.7636)  ( 2.00    -0.0273)  ( 0.00     0.8585)
 P :1...2            ( 2.00     0.1276)  ( 0.00     0.5906)
 D :1...1            ( 0.00     1.7635)
 F :1...1            ( 0.00     4.6353)

 CYCLE    3
  SDIIS (wt  0.000):  0.2135  0.7865
 A-DIIS (wt  1.000):  0.0951  0.9049
  DIIS coefficients:  0.0951  0.9049
 SCF Error: norm([F,P])=      1.598641295360, max([F,P])=      1.299865175390
 orbitals (Q,E):
 ---------------
 S :1...3            ( 2.00   -11.0442)  ( 2.00    -0.9652)  ( 0.00     0.1078)
 P :1...2            ( 2.00    -0.6605)  ( 0.00     0.0134)
 D :1...1            ( 0.00     0.8190)
 F :1...1            ( 0.00     3.5399)

 CYCLE    4
  SDIIS (wt  0.000): -0.0686  0.2255  0.8431
 A-DIIS (wt  1.000):  0.0000  0.0975  0.9025
  DIIS coefficients:  0.0000  0.0975  0.9025
 SCF Error: norm([F,P])=      0.757185849772, max([F,P])=      0.611521671871
 orbitals (Q,E):
 ---------------
 S :1...3            ( 2.00    -9.6252)  ( 2.00    -0.3730)  ( 0.00     0.4689)
 P :1...2            ( 2.00    -0.0787)  ( 0.00     0.2472)
 D :1...1            ( 0.00     1.3641)
 F :1...1            ( 0.00     4.1588)

 CYCLE    5
  SDIIS (wt  0.000): -0.0210 -0.0620  0.3481  0.7349
 A-DIIS (wt  1.000):  0.0000  0.0000  0.1855  0.8145
  DIIS coefficients:  0.0000  0.0000  0.1855  0.8145
 SCF Error: norm([F,P])=      0.377258149771, max([F,P])=      0.304834017371
 orbitals (Q,E):
 ---------------
 S :1...3            ( 2.00   -10.2267)  ( 2.00    -0.5859)  ( 0.00     0.3251)
 P :1...2            ( 2.00    -0.2708)  ( 0.00     0.1396)
 D :1...1            ( 0.00     1.1599)
 F :1...1            ( 0.00     3.9221)

 CYCLE    6
  SDIIS (wt  0.000):  0.0026 -0.0126 -0.0849  0.2523  0.8425
 A-DIIS (wt  1.000):  0.0000  0.0000  0.0000  0.0590  0.9410
  DIIS coefficients:  0.0000  0.0000  0.0000  0.0590  0.9410
 SCF Error: norm([F,P])=      0.155944681388, max([F,P])=      0.122417410719
 orbitals (Q,E):
 ---------------
 S :1...3            ( 2.00    -9.9299)  ( 2.00    -0.4620)  ( 0.00     0.4056)
 P :1...2            ( 2.00    -0.1542)  ( 0.00     0.1926)
 D :1...1            ( 0.00     1.2775)
 F :1...1            ( 0.00     4.0563)

 CYCLE    7
  SDIIS (wt  0.168):  0.0001  0.0023 -0.0075 -0.1316  0.3017  0.8350
 A-DIIS (wt  0.832):  0.0000  0.0000  0.0000  0.0000  0.2920  0.7080
  DIIS coefficients:  0.0000  0.0004 -0.0013 -0.0221  0.2936  0.7293
 SCF Error: norm([F,P])=      0.105416662228, max([F,P])=      0.083411860504
 orbitals (Q,E):
 ---------------
 S :1...3            ( 2.00   -10.0703)  ( 2.00    -0.5161)  ( 0.00     0.3698)
 P :1...2            ( 2.00    -0.2040)  ( 0.00     0.1673)
 D :1...1            ( 0.00     1.2259)
 F :1...1            ( 0.00     3.9970)

 CYCLE    8
  SDIIS (wt  0.840): -0.0000  0.0003  0.0006 -0.0137 -0.0385  0.1707  0.8807
 A-DIIS (wt  0.160):  0.0000  0.0000  0.0000  0.0000  0.0000  0.0000  1.0000
  DIIS coefficients: -0.0000  0.0002  0.0005 -0.0115 -0.0323  0.1433  0.8998
 SCF Error: norm([F,P])=      0.021423375961, max([F,P])=      0.016868570812
 orbitals (Q,E):
 ---------------
 S :1...3            ( 2.00   -10.0430)  ( 2.00    -0.5049)  ( 0.00     0.3772)
 P :1...2            ( 2.00    -0.1934)  ( 0.00     0.1722)
 D :1...1            ( 0.00     1.2365)
 F :1...1            ( 0.00     4.0092)

 CYCLE    9
  SDIIS (wt  0.987): -0.0000  0.0000  0.0005 -0.0017 -0.0010 -0.0044  0.0718  0.9348
 A-DIIS (wt  0.013):  0.0000  0.0000  0.0000  0.0000  0.0000  0.0000  0.0000  1.0000
  DIIS coefficients: -0.0000  0.0000  0.0004 -0.0016 -0.0010 -0.0044  0.0708  0.9357
 SCF Error: norm([F,P])=      0.002894575839, max([F,P])=      0.002292658632
 orbitals (Q,E):
 ---------------
 S :1...3            ( 2.00   -10.0463)  ( 2.00    -0.5062)  ( 0.00     0.3764)
 P :1...2            ( 2.00    -0.1946)  ( 0.00     0.1716)
 D :1...1            ( 0.00     1.2353)
 F :1...1            ( 0.00     4.0078)

 CYCLE   10
  SDIIS (wt  1.000):  0.0000  0.0000 -0.0000 -0.0002  0.0004  0.0019  0.0010 -0.0152  1.0122
  DIIS coefficients:  0.0000  0.0000 -0.0000 -0.0002  0.0004  0.0019  0.0010 -0.0152  1.0122
 SCF Error: norm([F,P])=      0.000034784103, max([F,P])=      0.000027638631
 orbitals (Q,E):
 ---------------
 S :1...3            ( 2.00   -10.0462)  ( 2.00    -0.5062)  ( 0.00     0.3764)
 P :1...2            ( 2.00    -0.1946)  ( 0.00     0.1716)
 D :1...1            ( 0.00     1.2353)
 F :1...1            ( 0.00     4.0078)

 CYCLE   11
  SDIIS (wt  1.000):  0.0000  0.0000 -0.0000 -0.0000  0.0005 -0.0152  1.0147
  DIIS coefficients:  0.0000  0.0000 -0.0000 -0.0000  0.0005 -0.0152  1.0147
 SCF Error: norm([F,P])=      0.000000087724, max([F,P])=      0.000000073717
 orbitals (Q,E):
 ---------------
 S :1...3            ( 2.00   -10.0462)  ( 2.00    -0.5062)  ( 0.00     0.3764)
 P :1...2            ( 2.00    -0.1946)  ( 0.00     0.1716)
 D :1...1            ( 0.00     1.2353)
 F :1...1            ( 0.00     4.0078)

 CYCLE   12
  SDIIS (wt  1.000): -0.0000  0.0001 -0.0132  1.0131
  DIIS coefficients: -0.0000  0.0001 -0.0132  1.0131
 SCF Error: norm([F,P])=      0.000000003338, max([F,P])=      0.000000002501
 orbitals (Q,E):
 ---------------
 S :1...3            ( 2.00   -10.0462)  ( 2.00    -0.5062)  ( 0.00     0.3764)
 P :1...2            ( 2.00    -0.1946)  ( 0.00     0.1716)
 D :1...1            ( 0.00     1.2353)
 F :1...1            ( 0.00     4.0078)

 SCF CONVERGED

 CYCLE   13
1
 ***************************************************************************************************


                                                *******************
                                                *  R E S U L T S  *
                                                *******************
  
  
 Hartree-Fock exchange energy:   -4.65117241890225     
 *** Setting up for NEW gradients in Focky
 *** Using FIT density in Focky

 Scaled ZORA Orbital Energies, per Irrep and Spin:
 =================================================
                        Occup              E (au)              E (eV)       Diff (eV) with prev. cycle
                        -----      --------------------        ------       --------------------------
 S
               1        2.000     -0.10046243090602E+02      -273.372              -3.47E-09
               2        2.000     -0.50615057529249E+00       -13.773              -2.14E-09
               3        0.000      0.37636350174777E+00        10.241
               4        0.000      0.54260724623189E+01       147.651
               5        0.000      0.49901831679842E+02      1357.898
 P
               1        2.000     -0.19462885662885E+00        -5.296              -2.01E-09
               2        0.000      0.17159156222919E+00         4.669
               3        0.000      0.20275722516901E+01        55.173
 D
               1        0.000      0.12353389027293E+01        33.615
 F
               1        0.000      0.40078091367494E+01       109.058


 Partially Occupied:
               1 P                -0.19462885662885E+00
  
 HOMO :        2 S                -0.50615057529249E+00
 LUMO :        2 P                 0.17159156222919E+00
  


 Orbital Energies, all Irreps
 ========================================

 Irrep        no.  (spin)   Occup              E (au)                E (eV)
 ---------------------------------------------------------------------------
 S             1             2.00       -0.10046243090602E+02      -273.3722
 S             2             2.00       -0.50615057529249E+00       -13.7731
 P             1             2.00       -0.19462885662885E+00        -5.2961
 P             2             0.00        0.17159156222919E+00         4.6692
 S             3             0.00        0.37636350174777E+00        10.2414
 D             1             0.00        0.12353389027293E+01        33.6153
 P             3             0.00        0.20275722516901E+01        55.1730
 F             1             0.00        0.40078091367494E+01       109.0580
 S             4             0.00        0.54260724623189E+01       147.6509
 S             5             0.00        0.49901831679842E+02      1357.8979


 All Electron Calculation, thus no Orbital Energies of the Core Orbitals are calculated


 =======================================
 M U L L I K E N   P O P U L A T I O N S
 =======================================
  
 The survey below gives for each atom:
 a) the total charge (Z minus electrons)
 b) the net spin polarization (nr of electrons spin-A minus spin-B)
 c) for each spin the atomic electron valence density (integrated) per L-value.

 Atom              Charge    Spin density          S         P         D         F
 ----              ------    ------------       ------    ------    ------    ------
 1 C              -0.0000                       4.0000    2.0000    0.0000    0.0000

 Populations of individual BAS functions
 ----------------------------------------
 1 C            0.4934  1.5043  0.9274  1.1304 -0.0555  0.1738  0.1738  0.1738  0.3895  0.3895
                0.3895  0.1034  0.1034  0.1034  0.0000  0.0000  0.0000  0.0000  0.0000  0.0000
                0.0000  0.0000  0.0000  0.0000  0.0000  0.0000  0.0000  0.0000  0.0000  0.0000

 Gross Charges per Atom (Z minus electrons)
 ==========================================
            -0.0000
 Net Total: -0.00000000


 =======================================================================
 Electrostatic potential at the Nuclei due to electrons and other nuclei
 =======================================================================
  
         Atom                  Potential
         ----                  ---------
     1)   C                  14.67531420
 
 
 ========================
 No memory problems found
 ========================
 
 Maximum number of active allocate calls:         480
 
 *******************************************************************************

                             A D F   E X I T
 NORMAL TERMINATION


 =================
 Timing Statistics
 =================
  
 Total Used :                     CPU=        0.32      System=        0.02     Elapsed=        0.40

 Calls  Section                     ( Mean, Percentage )
 ---------------------------------------------------------------------------------------------------
     3  ><      ................      0.00    0.29             0.00    0.03             0.00    0.84
     1  INIT    ................      0.01    3.11             0.01   35.24             0.03    6.52
     1  GEOMET  ................      0.00    1.50             0.00   17.49             0.01    3.43
     1  INPUTA  ................      0.00    0.54             0.00    0.00             0.00    0.58
     1  MAINSY  ................      0.01    1.77             0.00    4.41             0.01    2.93
     1  SYMFIT  ................      0.00    0.18             0.00    1.86             0.00    0.23
     1  CORORT  ................      0.00    0.07             0.00    0.76             0.00    0.39
     1  SYMORB  ................      0.00    0.18             0.00    1.81             0.00    0.22
     1  FITINT  ................      0.01    2.53             0.00    7.94             0.01    2.73
     1  CLSMAT  ................      0.00    0.09             0.00    0.00             0.00    0.42
     1  ORTHON  ................      0.00    0.41             0.00    0.00             0.00    0.59
     1  GENPT   ................      0.01    2.81             0.00    0.00             0.01    2.80
     1  PTBAS   ................      0.00    1.02             0.00    0.00             0.00    1.16
    13  FOCKY   ................      0.02   69.85             0.00    8.25             0.02   57.48
    13  FOCKTR  ................      0.00    2.37             0.00    0.31             0.00    1.93
    13  SDIIS   ................      0.00    4.77             0.00    0.38             0.00    8.77
     1  COREPS  ................      0.01    4.02             0.00    0.00             0.01    3.24
     1  POPAN   ................      0.00    1.21             0.00    0.00             0.01    1.35
     1  DEBYE   ................      0.00    0.14             0.00    0.00             0.00    0.38
     1  EXIT PROCEDURE .........      0.01    3.13             0.00   21.53             0.02    4.00


 Currently Open Files (EXIT00)
 ====================

 Unit    Access Format  Status   Type       Ident (file)
 -------------------------------------------------------
   3      SEQ    FORM   TRANSP  NORMAL      LOGFILE
                                          ( logfile )


 Buffered I/O statistics
 =======================
 Memory available:                     67108864
 Number of records fitting in memory:     16131
 Input :   0.1% of                        32775  *4k bytes
 Output:  15.4% of                         1510  *4k bytes
 Records from serial files evicted:           0
                    others evicted:           0
 Hash table lookups:      85112 with          0 conflicts (  0.00%)

 ***************************************************************************************************
 (LOGFILE)
 <Dec12-2020> <05:11:27>  DIRAC 2017  RunTime: Dec12-2020 05:11:27  Nodes: 1  Procs: 1
 <Dec12-2020> <05:11:27>  NORMAL TERMINATION
 <Dec12-2020> <05:11:27>  END
 <Dec12-2020> <05:11:28>  ADF 2017  RunTime: Dec12-2020 05:11:28  Nodes: 1  Procs: 1
 <Dec12-2020> <05:11:28>  Hydrogen (TZ2P)
 <Dec12-2020> <05:11:28>  RunType   : CREATE
 <Dec12-2020> <05:11:28>  Net Charge: 0 (Nuclei minus Electrons)
 <Dec12-2020> <05:11:28>  Symmetry  : ATOM
  Coordinates
    Atom         X           Y           Z   (Angstrom)
    1.H         0.000000    0.000000    0.000000
 <Dec12-2020> <05:11:28>  >>>> CORORT
 <Dec12-2020> <05:11:28>  >>>> FITINT
 <Dec12-2020> <05:11:28>  >>>> CLSMAT
 <Dec12-2020> <05:11:28>  >>>> ORTHON
 <Dec12-2020> <05:11:28>  >>>> GENPT
 <Dec12-2020> <05:11:28>  Block Length=  64
 <Dec12-2020> <05:11:28>  >>>> PTBAS
 <Dec12-2020> <05:11:28>  >>>> CYCLE
 <Dec12-2020> <05:11:28>              |Error|         MaxErr       Wt(A-DIIS)
 <Dec12-2020> <05:11:28>      1      0.00000000      0.00000000
 <Dec12-2020> <05:11:28>      2      0.03155047      0.03012130
 <Dec12-2020> <05:11:28>      3      0.00862036      0.00834572    100.0
 <Dec12-2020> <05:11:28>      4      0.00173320      0.00171953      0.7
 <Dec12-2020> <05:11:28>      5      0.00004372      0.00003982      0.0
 <Dec12-2020> <05:11:28>      6      0.00000239      0.00000216      0.0
 <Dec12-2020> <05:11:28>      7      0.00000001      0.00000001      0.0
 <Dec12-2020> <05:11:28>  SCF converged
 <Dec12-2020> <05:11:28>      8      0.00000000      0.00000000      0.0
 <Dec12-2020> <05:11:28>  >>>> POPAN
 <Dec12-2020> <05:11:28>  >>>> DEBYE
 <Dec12-2020> <05:11:28>  NORMAL TERMINATION
 <Dec12-2020> <05:11:28>  END
 <Dec12-2020> <05:11:28>  DIRAC 2017  RunTime: Dec12-2020 05:11:28  Nodes: 1  Procs: 1
 <Dec12-2020> <05:11:28>  NORMAL TERMINATION
 <Dec12-2020> <05:11:28>  END
 <Dec12-2020> <05:11:28>  ADF 2017  RunTime: Dec12-2020 05:11:28  Nodes: 1  Procs: 1
 <Dec12-2020> <05:11:28>  Oxygen (TZ2P)
 <Dec12-2020> <05:11:28>  RunType   : CREATE
 <Dec12-2020> <05:11:28>  Net Charge: 0 (Nuclei minus Electrons)
 <Dec12-2020> <05:11:28>  Symmetry  : ATOM
  Coordinates
    Atom         X           Y           Z   (Angstrom)
    1.O         0.000000    0.000000    0.000000
 <Dec12-2020> <05:11:28>  >>>> CORORT
 <Dec12-2020> <05:11:28>  >>>> FITINT
 <Dec12-2020> <05:11:28>  >>>> CLSMAT
 <Dec12-2020> <05:11:28>  >>>> ORTHON
 <Dec12-2020> <05:11:28>  >>>> GENPT
 <Dec12-2020> <05:11:28>  Block Length=  68
 <Dec12-2020> <05:11:28>  >>>> PTBAS
 <Dec12-2020> <05:11:28>  >>>> CYCLE
 <Dec12-2020> <05:11:28>              |Error|         MaxErr       Wt(A-DIIS)
 <Dec12-2020> <05:11:28>      1      0.00000000      0.00000000
 <Dec12-2020> <05:11:28>      2      8.79331784      5.53292320    100.0
 <Dec12-2020> <05:11:28>      3      3.55209211      2.50699170    100.0
 <Dec12-2020> <05:11:28>      4      1.18640029      0.59820387    100.0
 <Dec12-2020> <05:11:28>      5      1.46772569      0.81857736    100.0
 <Dec12-2020> <05:11:28>      6      0.14299252      0.08525819     85.1
 <Dec12-2020> <05:11:28>      7      0.12268505      0.07034931     70.0
 <Dec12-2020> <05:11:28>      8      0.00232324      0.00105374      0.1
 <Dec12-2020> <05:11:28>      9      0.00012465      0.00006512      0.0
 <Dec12-2020> <05:11:28>     10      0.00000166      0.00000087      0.0
 <Dec12-2020> <05:11:28>     11      0.00000004      0.00000002      0.0
 <Dec12-2020> <05:11:28>     12      0.00000000      0.00000000      0.0
 <Dec12-2020> <05:11:28>  SCF converged
 <Dec12-2020> <05:11:28>     13      0.00000000      0.00000000      0.0
 <Dec12-2020> <05:11:28>  >>>> POPAN
 <Dec12-2020> <05:11:28>  >>>> DEBYE
 <Dec12-2020> <05:11:28>  NORMAL TERMINATION
 <Dec12-2020> <05:11:28>  END
 <Dec12-2020> <05:11:29>  DIRAC 2017  RunTime: Dec12-2020 05:11:29  Nodes: 1  Procs: 1
 <Dec12-2020> <05:11:29>  NORMAL TERMINATION
 <Dec12-2020> <05:11:29>  END
 <Dec12-2020> <05:11:29>  ADF 2017  RunTime: Dec12-2020 05:11:29  Nodes: 1  Procs: 1
 <Dec12-2020> <05:11:29>  Carbon (TZ2P)
 <Dec12-2020> <05:11:29>  RunType   : CREATE
 <Dec12-2020> <05:11:29>  Net Charge: 0 (Nuclei minus Electrons)
 <Dec12-2020> <05:11:29>  Symmetry  : ATOM
  Coordinates
    Atom         X           Y           Z   (Angstrom)
    1.C         0.000000    0.000000    0.000000
 <Dec12-2020> <05:11:29>  >>>> CORORT
 <Dec12-2020> <05:11:29>  >>>> FITINT
 <Dec12-2020> <05:11:29>  >>>> CLSMAT
 <Dec12-2020> <05:11:29>  >>>> ORTHON
 <Dec12-2020> <05:11:29>  >>>> GENPT
 <Dec12-2020> <05:11:29>  Block Length=  72
 <Dec12-2020> <05:11:29>  >>>> PTBAS
 <Dec12-2020> <05:11:29>  >>>> CYCLE
 <Dec12-2020> <05:11:29>              |Error|         MaxErr       Wt(A-DIIS)
 <Dec12-2020> <05:11:29>      1      0.00000000      0.00000000
 <Dec12-2020> <05:11:29>      2      4.50424801      3.33672525    100.0
 <Dec12-2020> <05:11:29>      3      1.59864130      1.29986518    100.0
 <Dec12-2020> <05:11:29>      4      0.75718585      0.61152167    100.0
 <Dec12-2020> <05:11:29>      5      0.37725815      0.30483402    100.0
 <Dec12-2020> <05:11:29>      6      0.15594468      0.12241741    100.0
 <Dec12-2020> <05:11:29>      7      0.10541666      0.08341186     83.2
 <Dec12-2020> <05:11:29>      8      0.02142338      0.01686857     16.0
 <Dec12-2020> <05:11:29>      9      0.00289458      0.00229266      1.3
 <Dec12-2020> <05:11:29>     10      0.00003478      0.00002764      0.0
 <Dec12-2020> <05:11:29>     11      0.00000009      0.00000007      0.0
 <Dec12-2020> <05:11:29>     12      0.00000000      0.00000000      0.0
 <Dec12-2020> <05:11:29>  SCF converged
 <Dec12-2020> <05:11:29>     13      0.00000000      0.00000000      0.0
 <Dec12-2020> <05:11:29>  >>>> POPAN
 <Dec12-2020> <05:11:29>  >>>> DEBYE
 <Dec12-2020> <05:11:29>  NORMAL TERMINATION
 <Dec12-2020> <05:11:29>  END
NORMAL TERMINATION


 Parallel Execution: Process Information
 ==============================================================================
 Rank   Node Name                              NodeID   MyNodeRank  NodeMaster
    0   r11n18.lisa.surfsara.nl                   0          0          0
    1   r11n18.lisa.surfsara.nl                   0          1         -1
    2   r11n18.lisa.surfsara.nl                   0          2         -1
    3   r11n18.lisa.surfsara.nl                   0          3         -1
    4   r11n18.lisa.surfsara.nl                   0          4         -1
    5   r11n18.lisa.surfsara.nl                   0          5         -1
    6   r11n18.lisa.surfsara.nl                   0          6         -1
    7   r11n18.lisa.surfsara.nl                   0          7         -1
    8   r12n28.lisa.surfsara.nl                   1          0          1
    9   r12n28.lisa.surfsara.nl                   1          1         -1
   10   r12n28.lisa.surfsara.nl                   1          2         -1
   11   r12n28.lisa.surfsara.nl                   1          3         -1
   12   r12n28.lisa.surfsara.nl                   1          4         -1
   13   r12n28.lisa.surfsara.nl                   1          5         -1
   14   r12n28.lisa.surfsara.nl                   1          6         -1
   15   r12n28.lisa.surfsara.nl                   1          7         -1
 ==============================================================================


May use up to 45443MB of RAM as shared memory on node 0
May use up to 45443MB of RAM as shared memory on node 1


ATOMS
      1.C           0.0000    0.0000   -0.5918
      2.C          -1.2975    0.0000    0.1566
      3.C           1.2975   -0.0000    0.1566
      4.O           0.0000   -0.0000   -1.8134
      5.H           1.3592    0.9049    0.7966
      6.H           2.1572    0.0000   -0.5472
      7.H           1.3592   -0.9049    0.7966
      8.H          -1.3592   -0.9049    0.7966
      9.H          -1.3592    0.9049    0.7966
     10.H          -2.1572   -0.0000   -0.5472
END

NUMERICALQUALITY Good

SYMMETRY NOSYM

Unrestricted

CHARGE {0 {0}}

noncollinear

HartreeFock

NoPrint LogFile

XC
  GGA PBE
END

RELATIVISTIC Scalar ZORA

GEOMETRY
END

EXCITATIONS
ONLYSING
lowest 4
END

EXCITEDGO
    state A 2
    Singlet
END

SCF
  converge 1.0e-8 1.0e-6
  diis ok=0.01
  iterations 10000
END

Fragments
H t21.H
O t21.O
C t21.C
End
end input

 *******************************************************************************
 *                                                                             *
 *  -------------------------------------                                      *
 *   Amsterdam Density Functional  (ADF)         2017                          *
 *  -------------------------------------                                      *
 *                                               r58813 2017-04-12             *
 *                                                                             *
 *                                                                             *
 *                              =================                              *
 *                              |               |                              *
 *                              |     A D F     |                              *
 *                              |               |                              *
 *                              =================                              *
 *                                                                             *
 *                                                                             *
 *   Online information and documentation:  https://www.scm.com/support/       *
 *   E-mail:  support@scm.com   info@scm.com                                   *
 *                                                                             *
 *   Scientific publications using ADF results must be properly referenced     *
 *   See the User Manuals (or the web site) for recommended citations          *
 *   The terms and conditions of the End User License Agreement apply to       *
 *   the use of ADF, https://www.scm.com/license-terms/                        *
 *                                                                             *
 **********************  x86_64_linux_intel / intelmpi  ************************
 
 Licensed to: SURF-SARA, Comp. & Networking Services / Amsterdam / NL
 SCM User ID: u7409
  
 ADF 2017  RunTime: Dec12-2020 05:11:31  Nodes: 2  Procs: 16

 Temporary files are created in /scratch/kid_0.sj5nIY


Communication costs MPI_COMM_WORLD:  21423.795 usec per message,  18.4277 usec per 8-byte item
Communication costs for intra-node:  20240.780 usec per message,  15.7525 usec per 8-byte item

 *** (NO TITLE) ***


 ===========================
 A T T A C H E D   F I L E S
 ===========================
  


 ===============================
 M O D E L   P A R A M E T E R S
 ===============================
  
 DENSITY FUNCTIONAL POTENTIAL (scf)
    LDA:                               PW92                                    == Not Default ==
    Gradient Corrections:              PBEc PBEx                               == Not Default ==

 SPIN  (restricted / unrestr.)
    Molecule:                          UNrestricted                            == Not Default ==
    Fragments:                         Restricted                               

 OTHER ASPECTS
    Relativistic Corrections:          scalar (ZORA,MAPA)                      == Not Default ==

    Nuclear Charge Density Model:      Point Charge Nuclei                      
    Core Treatment:                    Frozen Orbital(s)                        

    Hyperfine or Zeeman Interaction:   ---                                      


 Fragment File(s)
 ----------------
 C:
         file : t21.C
         jobid: ADF 2017  RunTime: Dec12-2020 05:11:29  Nodes: 1  Procs: 1
         title: Carbon (TZ2P)
 O:
         file : t21.O
         jobid: ADF 2017  RunTime: Dec12-2020 05:11:28  Nodes: 1  Procs: 1
         title: Oxygen (TZ2P)
 H:
         file : t21.H
         jobid: ADF 2017  RunTime: Dec12-2020 05:11:28  Nodes: 1  Procs: 1
         title: Hydrogen (TZ2P)


                                   *********************************************
                                   *  R U N   T Y P E : GEOMETRY OPTIMIZATION  *
                                   *********************************************
  


 ===============
 G E O M E T R Y  ***  3D  Molecule  ***
 ===============
  

 ATOMS
 =====                            X Y Z                    CHARGE
                                (Angstrom)             Nucl     +Core       At.Mass
                       --------------------------    ----------------       -------
    1  C               0.0000    0.0000   -0.5918      6.00      6.00       12.0000
    2  C              -1.2975    0.0000    0.1566      6.00      6.00       12.0000
    3  C               1.2975    0.0000    0.1566      6.00      6.00       12.0000
    4  O               0.0000    0.0000   -1.8134      8.00      8.00       15.9949
    5  H               1.3592    0.9049    0.7966      1.00      1.00        1.0078
    6  H               2.1572    0.0000   -0.5472      1.00      1.00        1.0078
    7  H               1.3592   -0.9049    0.7966      1.00      1.00        1.0078
    8  H              -1.3592   -0.9049    0.7966      1.00      1.00        1.0078
    9  H              -1.3592    0.9049    0.7966      1.00      1.00        1.0078
   10  H              -2.1572    0.0000   -0.5472      1.00      1.00        1.0078


 FRAGMENTS
 =========                                     Atoms in this Fragment     Cart. coord.s (Angstrom)
                                               -------------------------------------------------------
    1  C                                                 1  C            0.0000    0.0000   -0.5918
    2  C                                                 2  C           -1.2975    0.0000    0.1566
    3  C                                                 3  C            1.2975    0.0000    0.1566
    4  O                                                 4  O            0.0000    0.0000   -1.8134
    5  H                                                 5  H            1.3592    0.9049    0.7966
    6  H                                                 6  H            2.1572    0.0000   -0.5472
    7  H                                                 7  H            1.3592   -0.9049    0.7966
    8  H                                                 8  H           -1.3592   -0.9049    0.7966
    9  H                                                 9  H           -1.3592    0.9049    0.7966
   10  H                                                10  H           -2.1572    0.0000   -0.5472


 Interatomic Distance Matrix (Angstrom)
 --------------------------------------

   1)     0.000
   2)     1.498   0.000
   3)     1.498   2.595   0.000
   4)     1.222   2.359   2.359   0.000
   5)     2.143   2.879   1.110   3.079   0.000
   6)     2.158   3.526   1.111   2.501   1.806   0.000
   7)     2.143   2.879   1.110   3.079   1.810   1.806   0.000
   8)     2.143   1.110   2.879   3.079   3.266   3.872   2.718   0.000
   9)     2.143   1.110   2.879   3.079   2.718   3.872   3.266   1.810   0.000
  10)     2.158   1.111   3.526   2.501   3.872   4.314   3.872   1.806   1.806   0.000

 Min. Distance =    1.1101
 Max. Distance =    4.3144


 =====================================
 S Y M M E T R Y ,   E L E C T R O N S
 =====================================
  
 Symmetry: NOSYM

 Irreducible Representations, including subspecies
 -------------------------------------------------
 A


 Configuration of Valence Electrons
 ==================================
 ( determined in the SCF procedure )

 Total:   16 (Spin-A)  + 16 (Spin-B)

 Net Charge: 0 (Nuclei minus Electrons)
 Spin polar: 0 (Spin_A minus Spin_B electrons)

 Aufbau principle for MO occupations will be applied through SCF cycle no.    5000
 Thereafter, the program will assign electrons to MOs that are spatially
 similar to the occupied MOs in a "reference" cycle ("KeepOrbitals").
 The reference cycle is always the PREVIOUS cycle: it will evolve with
 the SCF procedure.
1
 ***************************************************************************************************


                                      ****************************************
                                      *  B U I L D : (Fragments, Functions)  *
                                      ****************************************
  


 =======
 S F O s  ***  (Symmetrized Fragment Orbitals)  ***
 =======
  
 SFOs are linear combinations of (valence) Fragment Orbitals (FOs), such that the SFOs transform as the
 irreducible representations of the (molecular) symmetry group. Each SFO is therefore characterized by
 an irrep of the molecule and by a few (or only one) generating FOs.
 The SFOs constitute a symmetry-adapted basis for the Fock matrix. The MO eigenvector coefficients in
 this basis provide a direct interpretation of the MOs in terms of Frontier Orbital Theory.

 The SFOs are combined with auxiliary Core Functions (CFs) to ensure orthogonalization on the (frozen)
 Core Orbitals (COs). The Core-orthogonalized SFOs (CSFOs) constitute the true Fock basis.

 The FOs, and hence also the (C)SFOs are combinations of the elementary basis functions (BAS). The basis
 functions that participate in the description of the SFOs depend on the irrep. The indices of the
 involved functions are printed below for each irrep.
 (The complete list of primitive basis functions is printed in another section)

 Total nr. of (C)SFOs (summation over all irreps) :   170

 NOTE: a (C)SFO that is defined as a combination of more than one FO is usually NOT normalized.


                                       === A ===
 Nr. of SFOs :  170
 Cartesian basis functions that participate in this irrep (total number =   192) :
      1     2     3     4     5     6     9    12     7    10
     13     8    11    14    15    16    17    18    19    20
     21    22    23    24    25    26    27    28    29    30
     31    32    33    34    35    36    39    42    37    40
     43    38    41    44    45    46    47    48    49    50
     51    52    53    54    55    56    57    58    59    60
     61    62    63    64    65    66    69    72    67    70
     73    68    71    74    75    76    77    78    79    80
     81    82    83    84    85    86    87    88    89    90
     91    92    93    94    95    96    99   102    97   100
    103    98   101   104   105   106   107   108   109   110
    111   112   113   114   115   116   117   118   119   120
    121   122   123   124   125   126   127   128   129   130
    131   132   133   134   135   136   137   138   139   140
    141   142   143   144   145   146   147   148   149   150
    151   152   153   154   155   156   157   158   159   160
    161   162   163   164   165   166   167   168   169   170
    171   172   173   174   175   176   177   178   179   180
    181   182   183   184   185   186   187   188   189   190
    191   192

    SFO  (index         Fragment          Generating    Expansion in Fragment Orbitals
  indx  incl.CFs)   Occup   Orb.Energy   FragmentType  Coeff.   Orbital     on Fragment
 --------------------------------------------------------------------------------------
     1       1      2.000     -10.051 au  C             1.00      1 S               1
                        (    -273.488 eV)
     2       2      2.000      -0.506 au  C             1.00      2 S               1
                        (     -13.774 eV)
     3       3       --         0.376 au  C             1.00      3 S               1
                        (      10.242 eV)
     4       4       --         5.428 au  C             1.00      4 S               1
                        (     147.709 eV)
     5       5       --        50.037 au  C             1.00      5 S               1
                        (    1361.567 eV)
     6       6      0.667      -0.195 au  C             1.00      1 P:x             1
                        (      -5.296 eV)
     7       7       --         0.172 au  C             1.00      2 P:x             1
                        (       4.669 eV)
     8       8       --         2.028 au  C             1.00      3 P:x             1
                        (      55.182 eV)
     9       9      0.667      -0.195 au  C             1.00      1 P:y             1
                        (      -5.296 eV)
    10      10       --         0.172 au  C             1.00      2 P:y             1
                        (       4.669 eV)
    11      11       --         2.028 au  C             1.00      3 P:y             1
                        (      55.182 eV)
    12      12      0.667      -0.195 au  C             1.00      1 P:z             1
                        (      -5.296 eV)
    13      13       --         0.172 au  C             1.00      2 P:z             1
                        (       4.669 eV)
    14      14       --         2.028 au  C             1.00      3 P:z             1
                        (      55.182 eV)
    15      15       --         1.235 au  C             1.00      1 D:z2            1
                        (      33.617 eV)
    16      16       --         1.235 au  C             1.00      1 D:x2-y2         1
                        (      33.617 eV)
    17      17       --         1.235 au  C             1.00      1 D:xy            1
                        (      33.617 eV)
    18      18       --         1.235 au  C             1.00      1 D:xz            1
                        (      33.617 eV)
    19      19       --         1.235 au  C             1.00      1 D:yz            1
                        (      33.617 eV)
    20      20       --         4.008 au  C             1.00      1 F:z3            1
                        (     109.074 eV)
    21      21       --         4.008 au  C             1.00      1 F:z             1
                        (     109.074 eV)
    22      22       --         4.008 au  C             1.00      1 F:xyz           1
                        (     109.074 eV)
    23      23       --         4.008 au  C             1.00      1 F:z2x           1
                        (     109.074 eV)
    24      24       --         4.008 au  C             1.00      1 F:z2y           1
                        (     109.074 eV)
    25      25       --         4.008 au  C             1.00      1 F:x             1
                        (     109.074 eV)
    26      26       --         4.008 au  C             1.00      1 F:y             1
                        (     109.074 eV)
    27      27      2.000     -10.051 au  C             1.00      1 S               2
                        (    -273.488 eV)
    28      28      2.000      -0.506 au  C             1.00      2 S               2
                        (     -13.774 eV)
    29      29       --         0.376 au  C             1.00      3 S               2
                        (      10.242 eV)
    30      30       --         5.428 au  C             1.00      4 S               2
                        (     147.709 eV)
    31      31       --        50.037 au  C             1.00      5 S               2
                        (    1361.567 eV)
    32      32      0.667      -0.195 au  C             1.00      1 P:x             2
                        (      -5.296 eV)
    33      33       --         0.172 au  C             1.00      2 P:x             2
                        (       4.669 eV)
    34      34       --         2.028 au  C             1.00      3 P:x             2
                        (      55.182 eV)
    35      35      0.667      -0.195 au  C             1.00      1 P:y             2
                        (      -5.296 eV)
    36      36       --         0.172 au  C             1.00      2 P:y             2
                        (       4.669 eV)
    37      37       --         2.028 au  C             1.00      3 P:y             2
                        (      55.182 eV)
    38      38      0.667      -0.195 au  C             1.00      1 P:z             2
                        (      -5.296 eV)
    39      39       --         0.172 au  C             1.00      2 P:z             2
                        (       4.669 eV)
    40      40       --         2.028 au  C             1.00      3 P:z             2
                        (      55.182 eV)
    41      41       --         1.235 au  C             1.00      1 D:z2            2
                        (      33.617 eV)
    42      42       --         1.235 au  C             1.00      1 D:x2-y2         2
                        (      33.617 eV)
    43      43       --         1.235 au  C             1.00      1 D:xy            2
                        (      33.617 eV)
    44      44       --         1.235 au  C             1.00      1 D:xz            2
                        (      33.617 eV)
    45      45       --         1.235 au  C             1.00      1 D:yz            2
                        (      33.617 eV)
    46      46       --         4.008 au  C             1.00      1 F:z3            2
                        (     109.074 eV)
    47      47       --         4.008 au  C             1.00      1 F:z             2
                        (     109.074 eV)
    48      48       --         4.008 au  C             1.00      1 F:xyz           2
                        (     109.074 eV)
    49      49       --         4.008 au  C             1.00      1 F:z2x           2
                        (     109.074 eV)
    50      50       --         4.008 au  C             1.00      1 F:z2y           2
                        (     109.074 eV)
    51      51       --         4.008 au  C             1.00      1 F:x             2
                        (     109.074 eV)
    52      52       --         4.008 au  C             1.00      1 F:y             2
                        (     109.074 eV)
    53      53      2.000     -10.051 au  C             1.00      1 S               3
                        (    -273.488 eV)
    54      54      2.000      -0.506 au  C             1.00      2 S               3
                        (     -13.774 eV)
    55      55       --         0.376 au  C             1.00      3 S               3
                        (      10.242 eV)
    56      56       --         5.428 au  C             1.00      4 S               3
                        (     147.709 eV)
    57      57       --        50.037 au  C             1.00      5 S               3
                        (    1361.567 eV)
    58      58      0.667      -0.195 au  C             1.00      1 P:x             3
                        (      -5.296 eV)
    59      59       --         0.172 au  C             1.00      2 P:x             3
                        (       4.669 eV)
    60      60       --         2.028 au  C             1.00      3 P:x             3
                        (      55.182 eV)
    61      61      0.667      -0.195 au  C             1.00      1 P:y             3
                        (      -5.296 eV)
    62      62       --         0.172 au  C             1.00      2 P:y             3
                        (       4.669 eV)
    63      63       --         2.028 au  C             1.00      3 P:y             3
                        (      55.182 eV)
    64      64      0.667      -0.195 au  C             1.00      1 P:z             3
                        (      -5.296 eV)
    65      65       --         0.172 au  C             1.00      2 P:z             3
                        (       4.669 eV)
    66      66       --         2.028 au  C             1.00      3 P:z             3
                        (      55.182 eV)
    67      67       --         1.235 au  C             1.00      1 D:z2            3
                        (      33.617 eV)
    68      68       --         1.235 au  C             1.00      1 D:x2-y2         3
                        (      33.617 eV)
    69      69       --         1.235 au  C             1.00      1 D:xy            3
                        (      33.617 eV)
    70      70       --         1.235 au  C             1.00      1 D:xz            3
                        (      33.617 eV)
    71      71       --         1.235 au  C             1.00      1 D:yz            3
                        (      33.617 eV)
    72      72       --         4.008 au  C             1.00      1 F:z3            3
                        (     109.074 eV)
    73      73       --         4.008 au  C             1.00      1 F:z             3
                        (     109.074 eV)
    74      74       --         4.008 au  C             1.00      1 F:xyz           3
                        (     109.074 eV)
    75      75       --         4.008 au  C             1.00      1 F:z2x           3
                        (     109.074 eV)
    76      76       --         4.008 au  C             1.00      1 F:z2y           3
                        (     109.074 eV)
    77      77       --         4.008 au  C             1.00      1 F:x             3
                        (     109.074 eV)
    78      78       --         4.008 au  C             1.00      1 F:y             3
                        (     109.074 eV)
    79      79      2.000     -18.928 au  O             1.00      1 S               4
                        (    -515.063 eV)
    80      80      2.000      -0.882 au  O             1.00      2 S               4
                        (     -23.988 eV)
    81      81       --         0.795 au  O             1.00      3 S               4
                        (      21.640 eV)
    82      82       --        13.464 au  O             1.00      4 S               4
                        (     366.386 eV)
    83      83       --       122.385 au  O             1.00      5 S               4
                        (    3330.270 eV)
    84      84      1.333      -0.332 au  O             1.00      1 P:x             4
                        (      -9.043 eV)
    85      85       --         0.353 au  O             1.00      2 P:x             4
                        (       9.607 eV)
    86      86       --         3.838 au  O             1.00      3 P:x             4
                        (     104.449 eV)
    87      87      1.333      -0.332 au  O             1.00      1 P:y             4
                        (      -9.043 eV)
    88      88       --         0.353 au  O             1.00      2 P:y             4
                        (       9.607 eV)
    89      89       --         3.838 au  O             1.00      3 P:y             4
                        (     104.449 eV)
    90      90      1.333      -0.332 au  O             1.00      1 P:z             4
                        (      -9.043 eV)
    91      91       --         0.353 au  O             1.00      2 P:z             4
                        (       9.607 eV)
    92      92       --         3.838 au  O             1.00      3 P:z             4
                        (     104.449 eV)
    93      93       --         1.067 au  O             1.00      1 D:z2            4
                        (      29.041 eV)
    94      94       --         1.067 au  O             1.00      1 D:x2-y2         4
                        (      29.041 eV)
    95      95       --         1.067 au  O             1.00      1 D:xy            4
                        (      29.041 eV)
    96      96       --         1.067 au  O             1.00      1 D:xz            4
                        (      29.041 eV)
    97      97       --         1.067 au  O             1.00      1 D:yz            4
                        (      29.041 eV)
    98      98       --         3.353 au  O             1.00      1 F:z3            4
                        (      91.229 eV)
    99      99       --         3.353 au  O             1.00      1 F:z             4
                        (      91.229 eV)
   100     100       --         3.353 au  O             1.00      1 F:xyz           4
                        (      91.229 eV)
   101     101       --         3.353 au  O             1.00      1 F:z2x           4
                        (      91.229 eV)
   102     102       --         3.353 au  O             1.00      1 F:z2y           4
                        (      91.229 eV)
   103     103       --         3.353 au  O             1.00      1 F:x             4
                        (      91.229 eV)
   104     104       --         3.353 au  O             1.00      1 F:y             4
                        (      91.229 eV)
   105     105      1.000      -0.239 au  H             1.00      1 S               5
                        (      -6.494 eV)
   106     106       --         0.091 au  H             1.00      2 S               5
                        (       2.470 eV)
   107     107       --         1.522 au  H             1.00      3 S               5
                        (      41.412 eV)
   108     108       --         0.405 au  H             1.00      1 P:x             5
                        (      11.031 eV)
   109     109       --         0.405 au  H             1.00      1 P:y             5
                        (      11.031 eV)
   110     110       --         0.405 au  H             1.00      1 P:z             5
                        (      11.031 eV)
   111     111       --         2.566 au  H             1.00      1 D:z2            5
                        (      69.819 eV)
   112     112       --         2.566 au  H             1.00      1 D:x2-y2         5
                        (      69.819 eV)
   113     113       --         2.566 au  H             1.00      1 D:xy            5
                        (      69.819 eV)
   114     114       --         2.566 au  H             1.00      1 D:xz            5
                        (      69.819 eV)
   115     115       --         2.566 au  H             1.00      1 D:yz            5
                        (      69.819 eV)
   116     116      1.000      -0.239 au  H             1.00      1 S               6
                        (      -6.494 eV)
   117     117       --         0.091 au  H             1.00      2 S               6
                        (       2.470 eV)
   118     118       --         1.522 au  H             1.00      3 S               6
                        (      41.412 eV)
   119     119       --         0.405 au  H             1.00      1 P:x             6
                        (      11.031 eV)
   120     120       --         0.405 au  H             1.00      1 P:y             6
                        (      11.031 eV)
   121     121       --         0.405 au  H             1.00      1 P:z             6
                        (      11.031 eV)
   122     122       --         2.566 au  H             1.00      1 D:z2            6
                        (      69.819 eV)
   123     123       --         2.566 au  H             1.00      1 D:x2-y2         6
                        (      69.819 eV)
   124     124       --         2.566 au  H             1.00      1 D:xy            6
                        (      69.819 eV)
   125     125       --         2.566 au  H             1.00      1 D:xz            6
                        (      69.819 eV)
   126     126       --         2.566 au  H             1.00      1 D:yz            6
                        (      69.819 eV)
   127     127      1.000      -0.239 au  H             1.00      1 S               7
                        (      -6.494 eV)
   128     128       --         0.091 au  H             1.00      2 S               7
                        (       2.470 eV)
   129     129       --         1.522 au  H             1.00      3 S               7
                        (      41.412 eV)
   130     130       --         0.405 au  H             1.00      1 P:x             7
                        (      11.031 eV)
   131     131       --         0.405 au  H             1.00      1 P:y             7
                        (      11.031 eV)
   132     132       --         0.405 au  H             1.00      1 P:z             7
                        (      11.031 eV)
   133     133       --         2.566 au  H             1.00      1 D:z2            7
                        (      69.819 eV)
   134     134       --         2.566 au  H             1.00      1 D:x2-y2         7
                        (      69.819 eV)
   135     135       --         2.566 au  H             1.00      1 D:xy            7
                        (      69.819 eV)
   136     136       --         2.566 au  H             1.00      1 D:xz            7
                        (      69.819 eV)
   137     137       --         2.566 au  H             1.00      1 D:yz            7
                        (      69.819 eV)
   138     138      1.000      -0.239 au  H             1.00      1 S               8
                        (      -6.494 eV)
   139     139       --         0.091 au  H             1.00      2 S               8
                        (       2.470 eV)
   140     140       --         1.522 au  H             1.00      3 S               8
                        (      41.412 eV)
   141     141       --         0.405 au  H             1.00      1 P:x             8
                        (      11.031 eV)
   142     142       --         0.405 au  H             1.00      1 P:y             8
                        (      11.031 eV)
   143     143       --         0.405 au  H             1.00      1 P:z             8
                        (      11.031 eV)
   144     144       --         2.566 au  H             1.00      1 D:z2            8
                        (      69.819 eV)
   145     145       --         2.566 au  H             1.00      1 D:x2-y2         8
                        (      69.819 eV)
   146     146       --         2.566 au  H             1.00      1 D:xy            8
                        (      69.819 eV)
   147     147       --         2.566 au  H             1.00      1 D:xz            8
                        (      69.819 eV)
   148     148       --         2.566 au  H             1.00      1 D:yz            8
                        (      69.819 eV)
   149     149      1.000      -0.239 au  H             1.00      1 S               9
                        (      -6.494 eV)
   150     150       --         0.091 au  H             1.00      2 S               9
                        (       2.470 eV)
   151     151       --         1.522 au  H             1.00      3 S               9
                        (      41.412 eV)
   152     152       --         0.405 au  H             1.00      1 P:x             9
                        (      11.031 eV)
   153     153       --         0.405 au  H             1.00      1 P:y             9
                        (      11.031 eV)
   154     154       --         0.405 au  H             1.00      1 P:z             9
                        (      11.031 eV)
   155     155       --         2.566 au  H             1.00      1 D:z2            9
                        (      69.819 eV)
   156     156       --         2.566 au  H             1.00      1 D:x2-y2         9
                        (      69.819 eV)
   157     157       --         2.566 au  H             1.00      1 D:xy            9
                        (      69.819 eV)
   158     158       --         2.566 au  H             1.00      1 D:xz            9
                        (      69.819 eV)
   159     159       --         2.566 au  H             1.00      1 D:yz            9
                        (      69.819 eV)
   160     160      1.000      -0.239 au  H             1.00      1 S              10
                        (      -6.494 eV)
   161     161       --         0.091 au  H             1.00      2 S              10
                        (       2.470 eV)
   162     162       --         1.522 au  H             1.00      3 S              10
                        (      41.412 eV)
   163     163       --         0.405 au  H             1.00      1 P:x            10
                        (      11.031 eV)
   164     164       --         0.405 au  H             1.00      1 P:y            10
                        (      11.031 eV)
   165     165       --         0.405 au  H             1.00      1 P:z            10
                        (      11.031 eV)
   166     166       --         2.566 au  H             1.00      1 D:z2           10
                        (      69.819 eV)
   167     167       --         2.566 au  H             1.00      1 D:x2-y2        10
                        (      69.819 eV)
   168     168       --         2.566 au  H             1.00      1 D:xy           10
                        (      69.819 eV)
   169     169       --         2.566 au  H             1.00      1 D:xz           10
                        (      69.819 eV)
   170     170       --         2.566 au  H             1.00      1 D:yz           10
                        (      69.819 eV)


 ================================
 (Slater-type)  F U N C T I O N S  ***  (Basis and Fit)  ***
 ================================
  

 Atom Type    1  (C)
 ==============

 Valence Basis Sets:  10
 -----------------------
   1 S    7.680000
   1 S    5.000000
   2 S    1.280000
   2 S    2.100000
   2 S    4.600000
   2 P    0.820000
   2 P    1.480000
   2 P    2.940000
   3 D    2.200000
   4 F    3.300000

 Atom Type    2  (O)
 ==============

 Valence Basis Sets:  10
 -----------------------
   1 S    9.800000
   1 S    6.800000
   2 S    7.580000
   2 S    2.880000
   2 S    1.720000
   2 P    4.080000
   2 P    2.080000
   2 P    1.120000
   3 D    2.000000
   4 F    3.000000

 Atom Type    3  (H)
 ==============

 Valence Basis Sets:   5
 -----------------------
   1 S    0.690000
   1 S    0.920000
   1 S    1.580000
   2 P    1.250000
   3 D    2.500000


 BAS: List of all Elementary Cartesian Basis Functions
 =====================================================

 The numbering in the list below (to the right of the function characteristics) is referred
 to in print-outs of MO eigenvectors and Mulliken populations in the BAS representation
 (as contrasted to the SFO representation).

 Notes:
 1. The functions are characterized by a polynomial prefactor (powers of x,y,z and r) and
    an exponential decay factor alpha.
 2. Since the basis sets are specific for an atom TYPE, the individual functions occur on
    all atoms of that type.
 3. The word 'Core' in the left margin signals that it is a Core Function (CF) : not a
    degree of freedom in the valence set, but only used to ensure orthogonalization of
    the other valence basis functions on the frozen Core Orbitals.


 (power of) X  Y  Z  R     Alpha  on Atom
            ==========     =====     ==========

 C                                    1    2    3
                                  ---------------------------------------------------------------------------
            0  0  0  0     7.680      1   31   61
            0  0  0  0     5.000      2   32   62
            0  0  0  1     1.280      3   33   63
            0  0  0  1     2.100      4   34   64
            0  0  0  1     4.600      5   35   65
            1  0  0  0     0.820      6   36   66
            0  1  0  0     0.820      7   37   67
            0  0  1  0     0.820      8   38   68
            1  0  0  0     1.480      9   39   69
            0  1  0  0     1.480     10   40   70
            0  0  1  0     1.480     11   41   71
            1  0  0  0     2.940     12   42   72
            0  1  0  0     2.940     13   43   73
            0  0  1  0     2.940     14   44   74
            2  0  0  0     2.200     15   45   75
            1  1  0  0     2.200     16   46   76
            1  0  1  0     2.200     17   47   77
            0  2  0  0     2.200     18   48   78
            0  1  1  0     2.200     19   49   79
            0  0  2  0     2.200     20   50   80
            3  0  0  0     3.300     21   51   81
            2  1  0  0     3.300     22   52   82
            2  0  1  0     3.300     23   53   83
            1  2  0  0     3.300     24   54   84
            1  1  1  0     3.300     25   55   85
            1  0  2  0     3.300     26   56   86
            0  3  0  0     3.300     27   57   87
            0  2  1  0     3.300     28   58   88
            0  1  2  0     3.300     29   59   89
            0  0  3  0     3.300     30   60   90

 O                                    4
                                  ---------------------------------------------------------------------------
            0  0  0  0     9.800     91
            0  0  0  0     6.800     92
            0  0  0  1     7.580     93
            0  0  0  1     2.880     94
            0  0  0  1     1.720     95
            1  0  0  0     4.080     96
            0  1  0  0     4.080     97
            0  0  1  0     4.080     98
            1  0  0  0     2.080     99
            0  1  0  0     2.080    100
            0  0  1  0     2.080    101
            1  0  0  0     1.120    102
            0  1  0  0     1.120    103
            0  0  1  0     1.120    104
            2  0  0  0     2.000    105
            1  1  0  0     2.000    106
            1  0  1  0     2.000    107
            0  2  0  0     2.000    108
            0  1  1  0     2.000    109
            0  0  2  0     2.000    110
            3  0  0  0     3.000    111
            2  1  0  0     3.000    112
            2  0  1  0     3.000    113
            1  2  0  0     3.000    114
            1  1  1  0     3.000    115
            1  0  2  0     3.000    116
            0  3  0  0     3.000    117
            0  2  1  0     3.000    118
            0  1  2  0     3.000    119
            0  0  3  0     3.000    120

 H                                    5    6    7    8    9   10
                                  ---------------------------------------------------------------------------
            0  0  0  0     0.690    121  133  145  157  169  181
            0  0  0  0     0.920    122  134  146  158  170  182
            0  0  0  0     1.580    123  135  147  159  171  183
            1  0  0  0     1.250    124  136  148  160  172  184
            0  1  0  0     1.250    125  137  149  161  173  185
            0  0  1  0     1.250    126  138  150  162  174  186
            2  0  0  0     2.500    127  139  151  163  175  187
            1  1  0  0     2.500    128  140  152  164  176  188
            1  0  1  0     2.500    129  141  153  165  177  189
            0  2  0  0     2.500    130  142  154  166  178  190
            0  1  1  0     2.500    131  143  155  167  179  191
            0  0  2  0     2.500    132  144  156  168  180  192

 Total number of charge fitting functions (nprimf)       636
 Total number of Cartesian basis functions (naos)        192
 Total number of Cartesian core functions  (ncos)          0


 Coordinates (Cartesian)
 =======================

     Atom                    bohr                                 angstrom                 Geometric Variables
                   X           Y           Z              X           Y           Z       (0:frozen, *:LT par.)
 --------------------------------------------------------------------------------------------------------------
     1 C       0.000000    0.000000   -1.118340       0.000000    0.000000   -0.591800      1       2       3
     2 C      -2.451920    0.000000    0.295931      -1.297500    0.000000    0.156600      4       5       6
     3 C       2.451920    0.000000    0.295931       1.297500    0.000000    0.156600      7       8       9
     4 O       0.000000    0.000000   -3.426829       0.000000    0.000000   -1.813400     10      11      12
     5 H       2.568516    1.710013    1.505356       1.359200    0.904900    0.796600     13      14      15
     6 H       4.076517    0.000000   -1.034058       2.157200    0.000000   -0.547200     16      17      18
     7 H       2.568516   -1.710013    1.505356       1.359200   -0.904900    0.796600     19      20      21
     8 H      -2.568516   -1.710013    1.505356      -1.359200   -0.904900    0.796600     22      23      24
     9 H      -2.568516    1.710013    1.505356      -1.359200    0.904900    0.796600     25      26      27
    10 H      -4.076517    0.000000   -1.034058      -2.157200    0.000000   -0.547200     28      29      30
 --------------------------------------------------------------------------------------------------------------
1
 ***************************************************************************************************


                                              ***********************
                                              *  T E C H N I C A L  *
                                              ***********************
  


 =============================================================
 P A R A L L E L I Z A T I O N  and  V E C T O R I Z A T I O N
 =============================================================
  
 Nr of parallel processes:                               16
 Maximum vector length in NumInt loops:                 128

 IO buffersize (Mb):                                     64.000000


 ===============================
 G E O M E T R Y   U P D A T E S
 ===============================
  
 Optimization coordinates:                       Delocalized
 Optimization code branch:                       NEW
 Hessian update method:                          BFGS (Broyden-Fletcher-Goldfarb-Shanno)

 Iterative Geometry Improvements:
    Max. nr. of iterations:                         60
    Convergence criteria:
         Change in energy (hartree):                 0.0010000000
         Gradients (au/Angstrom):                    0.0010000000
         Cart/bondlength changes (Angstrom):         0.0100000000
    Max. step to take:
         Trust Radius:                               0.2000000000

 GDIIS (Geometry Direct Inversion in Iteration Space):
    First geometry cycle:                            0
    Max. number expansion vectors:                   5


 =====================
 S C F   U P D A T E S
 =====================
  
 Max. nr. of cycles:                             10000
 Convergence criterion:                              0.0000000100
   secondary criterion:                              0.0000010000

 Mix parameter (when DIIS does not apply):           0.2000000000
 Mixed ADIIS+DIIS will be used
    Max number of expansion vectors:                10
    Pure ADIIS when Max([F,P]) is above              0.1000000000
    Pure DIIS when Max([F,P]) is below               0.0010000000
 Automatic ElectronSmearing (in case of problematic SCF convergence) disabled


 =================
 P R E C I S I O N  ***  (General: NumInt, NeglectFunctionTails, ...)  ***
 =================
  

 NumInt:           Target precision:                 6.0000000000
 -------           Initial precision:                6.0000000000
                   Min. precision (optimization):    6.0000000000

 Neglect Functions:          Basis functions:        0.1000000000E-15
 ------------------          Fit functions:          0.1000000000E-15


 ===========================
 L I N E A R   S C A L I N G
 ===========================
  

 Cut-off radii density fit:                        0.1000000000E-09
 Overlap cut-off criterion AO matrix elements:     0.1000000000E-07
 Cut-offs for Coulomb potential and fitted density:0.1000000000E-09
 Cut-off criterion for Coulomb multipole terms:    0.1000000000E-09
 Progressive Convergence parameter:                 0.000000000    
1
 ***************************************************************************************************


                                            ***************************
                                            *  C O M P U T A T I O N  *
                                            ***************************
  

 Number of elements of the density matrix on this node (used, total):      1329     18528


 ===========================================
 Numerical Integration : Fuzzy Cells (Becke)
 ===========================================
  
 Becke grid quality: GOOD           
  
 Lebedev angular grid order:             min:  11 max:  31
 Nr. of radial points:                   min:  54 max:  61

 Total nr. of points:     122552
 Nr. of blocks:              958
 Block length:               128
 Nr. of dummy points:         72


 Test of Precision of the Numerical Integration Grid
 ===================================================

 Integral of the Total Core Density:                   0.00000000000000


 ========================
 Density Fitting (zlmFit)
 ========================
  
 ZlmFit Fit Quality: GOOD           
  
 Max L-expansion:                        min:   8 max:   9
 Nr. of radial interpolation points:     min:  78 max: 108


 =====
 S C F  ***  ScaSCF  ***
 =====
  
 Initial density matrix is calculated as sum of fragments

 CYCLE    1
 SCF Error: norm([F,P])=      4.823484473161, max([F,P])=      0.532567924089
 ***** SPIN 1 *****
 orbitals (Q,E):
 ---------------
 A :7...26           ( 1.00    -0.8260)  ( 1.00    -0.6472)  ( 1.00    -0.5828)  ( 1.00    -0.5752)
                     ( 1.00    -0.5696)  ( 1.00    -0.5257)  ( 1.00    -0.5154)  ( 1.00    -0.5077)
                     ( 1.00    -0.4673)  ( 1.00    -0.3905)  ( 0.00    -0.1900)  ( 0.00    -0.0660)
                     ( 0.00    -0.0295)  ( 0.00    -0.0254)  ( 0.00    -0.0137)  ( 0.00     0.0042)
                     ( 0.00     0.0088)  ( 0.00     0.0154)  ( 0.00     0.0381)  ( 0.00     0.0706)
 ***** SPIN 2 *****
 orbitals (Q,E):
 ---------------
 A :7...26           ( 1.00    -0.8260)  ( 1.00    -0.6472)  ( 1.00    -0.5828)  ( 1.00    -0.5752)
                     ( 1.00    -0.5696)  ( 1.00    -0.5257)  ( 1.00    -0.5154)  ( 1.00    -0.5077)
                     ( 1.00    -0.4673)  ( 1.00    -0.3905)  ( 0.00    -0.1900)  ( 0.00    -0.0660)
                     ( 0.00    -0.0295)  ( 0.00    -0.0254)  ( 0.00    -0.0137)  ( 0.00     0.0042)
                     ( 0.00     0.0088)  ( 0.00     0.0154)  ( 0.00     0.0381)  ( 0.00     0.0706)
  
 Spin polar: 0 (Spin_A minus Spin_B electrons)

 CYCLE    2
   MIX coefficients:  0.8000  0.2000
 SCF Error: norm([F,P])=      0.992069718473, max([F,P])=      0.097109643557
 ***** SPIN 1 *****
 orbitals (Q,E):
 ---------------
 A :7...17           ( 1.00    -0.7613)  ( 1.00    -0.5856)  ( 1.00    -0.5203)  ( 1.00    -0.5153)
                     ( 1.00    -0.5073)  ( 1.00    -0.4688)  ( 1.00    -0.4501)  ( 1.00    -0.4471)
                     ( 1.00    -0.4019)  ( 1.00    -0.3115)  ( 0.00    -0.1412)
 ***** SPIN 2 *****
 orbitals (Q,E):
 ---------------
 A :7...17           ( 1.00    -0.7613)  ( 1.00    -0.5856)  ( 1.00    -0.5203)  ( 1.00    -0.5153)
                     ( 1.00    -0.5073)  ( 1.00    -0.4688)  ( 1.00    -0.4501)  ( 1.00    -0.4471)
                     ( 1.00    -0.4019)  ( 1.00    -0.3115)  ( 0.00    -0.1412)
  
 Spin polar: 0 (Spin_A minus Spin_B electrons)

 CYCLE    3
  SDIIS (wt  0.000): -0.7922  1.7922
 A-DIIS (wt  1.000):  0.0000  1.0000
  DIIS coefficients:  0.0000  1.0000
 SCF Error: norm([F,P])=      0.490658923817, max([F,P])=      0.043759312938
 ***** SPIN 1 *****
 orbitals (Q,E):
 ---------------
 A :7...17           ( 1.00    -0.5638)  ( 1.00    -0.4030)  ( 1.00    -0.3550)  ( 1.00    -0.3346)
                     ( 1.00    -0.3248)  ( 1.00    -0.2998)  ( 1.00    -0.2665)  ( 1.00    -0.2654)
                     ( 1.00    -0.2399)  ( 1.00    -0.1150)  ( 0.00     0.0010)
 ***** SPIN 2 *****
 orbitals (Q,E):
 ---------------
 A :7...17           ( 1.00    -0.5638)  ( 1.00    -0.4030)  ( 1.00    -0.3550)  ( 1.00    -0.3346)
                     ( 1.00    -0.3248)  ( 1.00    -0.2998)  ( 1.00    -0.2665)  ( 1.00    -0.2654)
                     ( 1.00    -0.2399)  ( 1.00    -0.1150)  ( 0.00     0.0010)
  
 Spin polar: 0 (Spin_A minus Spin_B electrons)

 CYCLE    4
  SDIIS (wt  0.000):  0.2656  0.2331  0.5012
 A-DIIS (wt  1.000):  0.0000  0.6603  0.3397
  DIIS coefficients:  0.0000  0.6603  0.3397
 SCF Error: norm([F,P])=      0.748045940176, max([F,P])=      0.078199454126
 ***** SPIN 1 *****
 orbitals (Q,E):
 ---------------
 A :7...17           ( 1.00    -0.6304)  ( 1.00    -0.4660)  ( 1.00    -0.4089)  ( 1.00    -0.3991)
                     ( 1.00    -0.3919)  ( 1.00    -0.3503)  ( 1.00    -0.3336)  ( 1.00    -0.3225)
                     ( 1.00    -0.3088)  ( 1.00    -0.2009)  ( 0.00    -0.0539)
 ***** SPIN 2 *****
 orbitals (Q,E):
 ---------------
 A :7...17           ( 1.00    -0.6304)  ( 1.00    -0.4660)  ( 1.00    -0.4089)  ( 1.00    -0.3991)
                     ( 1.00    -0.3919)  ( 1.00    -0.3503)  ( 1.00    -0.3336)  ( 1.00    -0.3225)
                     ( 1.00    -0.3088)  ( 1.00    -0.2009)  ( 0.00    -0.0539)
  
 Spin polar: 0 (Spin_A minus Spin_B electrons)

 CYCLE    5
  SDIIS (wt  0.834): -0.0862  0.4691  0.1485  0.4686
 A-DIIS (wt  0.166):  0.0000  0.0000  0.0000  1.0000
  DIIS coefficients: -0.0719  0.3911  0.1239  0.5569
 SCF Error: norm([F,P])=      0.151130077586, max([F,P])=      0.017450705230
 ***** SPIN 1 *****
 orbitals (Q,E):
 ---------------
 A :7...17           ( 1.00    -0.6539)  ( 1.00    -0.4824)  ( 1.00    -0.4249)  ( 1.00    -0.4158)
                     ( 1.00    -0.4007)  ( 1.00    -0.3708)  ( 1.00    -0.3428)  ( 1.00    -0.3425)
                     ( 1.00    -0.3094)  ( 1.00    -0.1998)  ( 0.00    -0.0600)
 ***** SPIN 2 *****
 orbitals (Q,E):
 ---------------
 A :7...17           ( 1.00    -0.6539)  ( 1.00    -0.4824)  ( 1.00    -0.4249)  ( 1.00    -0.4158)
                     ( 1.00    -0.4007)  ( 1.00    -0.3708)  ( 1.00    -0.3428)  ( 1.00    -0.3425)
                     ( 1.00    -0.3094)  ( 1.00    -0.1998)  ( 0.00    -0.0600)
  
 Spin polar: 0 (Spin_A minus Spin_B electrons)

 CYCLE    6
  SDIIS (wt  0.834): -0.0061  0.0876  0.0062  0.4464  0.4659
 A-DIIS (wt  0.166):  0.0000  0.0000  0.0000  0.3695  0.6305
  DIIS coefficients: -0.0051  0.0730  0.0052  0.4336  0.4933
 SCF Error: norm([F,P])=      0.117738212846, max([F,P])=      0.018070293790
 ***** SPIN 1 *****
 orbitals (Q,E):
 ---------------
 A :7...17           ( 1.00    -0.6490)  ( 1.00    -0.4804)  ( 1.00    -0.4218)  ( 1.00    -0.4136)
                     ( 1.00    -0.4023)  ( 1.00    -0.3667)  ( 1.00    -0.3450)  ( 1.00    -0.3395)
                     ( 1.00    -0.3140)  ( 1.00    -0.2063)  ( 0.00    -0.0612)
 ***** SPIN 2 *****
 orbitals (Q,E):
 ---------------
 A :7...17           ( 1.00    -0.6490)  ( 1.00    -0.4804)  ( 1.00    -0.4218)  ( 1.00    -0.4136)
                     ( 1.00    -0.4023)  ( 1.00    -0.3667)  ( 1.00    -0.3450)  ( 1.00    -0.3395)
                     ( 1.00    -0.3140)  ( 1.00    -0.2063)  ( 0.00    -0.0612)
  
 Spin polar: 0 (Spin_A minus Spin_B electrons)

 CYCLE    7
  SDIIS (wt  0.990): -0.0089  0.0282  0.0006  0.1251  0.1856  0.6694
 A-DIIS (wt  0.010):  0.0000  0.0000  0.0000  0.0000  0.0000  1.0000
  DIIS coefficients: -0.0088  0.0279  0.0006  0.1239  0.1838  0.6727
 SCF Error: norm([F,P])=      0.013643393859, max([F,P])=      0.001993618090
 ***** SPIN 1 *****
 orbitals (Q,E):
 ---------------
 A :7...17           ( 1.00    -0.6488)  ( 1.00    -0.4800)  ( 1.00    -0.4217)  ( 1.00    -0.4132)
                     ( 1.00    -0.4017)  ( 1.00    -0.3665)  ( 1.00    -0.3444)  ( 1.00    -0.3391)
                     ( 1.00    -0.3132)  ( 1.00    -0.2053)  ( 0.00    -0.0610)
 ***** SPIN 2 *****
 orbitals (Q,E):
 ---------------
 A :7...17           ( 1.00    -0.6488)  ( 1.00    -0.4800)  ( 1.00    -0.4217)  ( 1.00    -0.4132)
                     ( 1.00    -0.4017)  ( 1.00    -0.3665)  ( 1.00    -0.3444)  ( 1.00    -0.3391)
                     ( 1.00    -0.3132)  ( 1.00    -0.2053)  ( 0.00    -0.0610)
  
 Spin polar: 0 (Spin_A minus Spin_B electrons)

 CYCLE    8
  SDIIS (wt  1.000): -0.0011  0.0068  0.0010  0.0400  0.0611  0.2560  0.6361
  DIIS coefficients: -0.0011  0.0068  0.0010  0.0400  0.0611  0.2560  0.6361
 SCF Error: norm([F,P])=      0.001371334505, max([F,P])=      0.000212272790
 ***** SPIN 1 *****
 orbitals (Q,E):
 ---------------
 A :7...17           ( 1.00    -0.6488)  ( 1.00    -0.4800)  ( 1.00    -0.4217)  ( 1.00    -0.4132)
                     ( 1.00    -0.4017)  ( 1.00    -0.3665)  ( 1.00    -0.3444)  ( 1.00    -0.3391)
                     ( 1.00    -0.3133)  ( 1.00    -0.2053)  ( 0.00    -0.0609)
 ***** SPIN 2 *****
 orbitals (Q,E):
 ---------------
 A :7...17           ( 1.00    -0.6488)  ( 1.00    -0.4800)  ( 1.00    -0.4217)  ( 1.00    -0.4132)
                     ( 1.00    -0.4017)  ( 1.00    -0.3665)  ( 1.00    -0.3444)  ( 1.00    -0.3391)
                     ( 1.00    -0.3133)  ( 1.00    -0.2053)  ( 0.00    -0.0609)
  
 Spin polar: 0 (Spin_A minus Spin_B electrons)

 CYCLE    9
  SDIIS (wt  1.000): -0.0003  0.0009 -0.0000  0.0040  0.0065  0.0384  0.2171  0.7335
  DIIS coefficients: -0.0003  0.0009 -0.0000  0.0040  0.0065  0.0384  0.2171  0.7335
 SCF Error: norm([F,P])=      0.000243918397, max([F,P])=      0.000026449368
 ***** SPIN 1 *****
 orbitals (Q,E):
 ---------------
 A :7...17           ( 1.00    -0.6488)  ( 1.00    -0.4800)  ( 1.00    -0.4217)  ( 1.00    -0.4132)
                     ( 1.00    -0.4017)  ( 1.00    -0.3665)  ( 1.00    -0.3444)  ( 1.00    -0.3391)
                     ( 1.00    -0.3133)  ( 1.00    -0.2053)  ( 0.00    -0.0609)
 ***** SPIN 2 *****
 orbitals (Q,E):
 ---------------
 A :7...17           ( 1.00    -0.6488)  ( 1.00    -0.4800)  ( 1.00    -0.4217)  ( 1.00    -0.4132)
                     ( 1.00    -0.4017)  ( 1.00    -0.3665)  ( 1.00    -0.3444)  ( 1.00    -0.3391)
                     ( 1.00    -0.3133)  ( 1.00    -0.2053)  ( 0.00    -0.0609)
  
 Spin polar: 0 (Spin_A minus Spin_B electrons)

 CYCLE   10
  SDIIS (wt  1.000): -0.0000  0.0000  0.0000  0.0003  0.0006  0.0051  0.0483  0.2461  0.6996
  DIIS coefficients: -0.0000  0.0000  0.0000  0.0003  0.0006  0.0051  0.0483  0.2461  0.6996
 SCF Error: norm([F,P])=      0.000044207815, max([F,P])=      0.000005290517
 ***** SPIN 1 *****
 orbitals (Q,E):
 ---------------
 A :7...17           ( 1.00    -0.6488)  ( 1.00    -0.4800)  ( 1.00    -0.4217)  ( 1.00    -0.4132)
                     ( 1.00    -0.4017)  ( 1.00    -0.3665)  ( 1.00    -0.3444)  ( 1.00    -0.3391)
                     ( 1.00    -0.3133)  ( 1.00    -0.2053)  ( 0.00    -0.0609)
 ***** SPIN 2 *****
 orbitals (Q,E):
 ---------------
 A :7...17           ( 1.00    -0.6488)  ( 1.00    -0.4800)  ( 1.00    -0.4217)  ( 1.00    -0.4132)
                     ( 1.00    -0.4017)  ( 1.00    -0.3665)  ( 1.00    -0.3444)  ( 1.00    -0.3391)
                     ( 1.00    -0.3133)  ( 1.00    -0.2053)  ( 0.00    -0.0609)
  
 Spin polar: 0 (Spin_A minus Spin_B electrons)

 CYCLE   11
  SDIIS (wt  1.000):  0.0000 -0.0000 -0.0000 -0.0000 -0.0000  0.0004  0.0080  0.0578  0.2471  0.6868
  DIIS coefficients:  0.0000 -0.0000 -0.0000 -0.0000 -0.0000  0.0004  0.0080  0.0578  0.2471  0.6868
 SCF Error: norm([F,P])=      0.000009068083, max([F,P])=      0.000000758662
 ***** SPIN 1 *****
 orbitals (Q,E):
 ---------------
 A :7...17           ( 1.00    -0.6488)  ( 1.00    -0.4800)  ( 1.00    -0.4217)  ( 1.00    -0.4132)
                     ( 1.00    -0.4017)  ( 1.00    -0.3665)  ( 1.00    -0.3444)  ( 1.00    -0.3391)
                     ( 1.00    -0.3133)  ( 1.00    -0.2053)  ( 0.00    -0.0609)
 ***** SPIN 2 *****
 orbitals (Q,E):
 ---------------
 A :7...17           ( 1.00    -0.6488)  ( 1.00    -0.4800)  ( 1.00    -0.4217)  ( 1.00    -0.4132)
                     ( 1.00    -0.4017)  ( 1.00    -0.3665)  ( 1.00    -0.3444)  ( 1.00    -0.3391)
                     ( 1.00    -0.3133)  ( 1.00    -0.2053)  ( 0.00    -0.0609)
  
 Spin polar: 0 (Spin_A minus Spin_B electrons)

 CYCLE   12
  SDIIS (wt  1.000): -0.0000 -0.0000  0.0000 -0.0000  0.0000  0.0007  0.0081  0.0419  0.1837  0.7656
  DIIS coefficients: -0.0000 -0.0000  0.0000 -0.0000  0.0000  0.0007  0.0081  0.0419  0.1837  0.7656
 SCF Error: norm([F,P])=      0.000001181431, max([F,P])=      0.000000117172
 ***** SPIN 1 *****
 orbitals (Q,E):
 ---------------
 A :7...17           ( 1.00    -0.6488)  ( 1.00    -0.4800)  ( 1.00    -0.4217)  ( 1.00    -0.4132)
                     ( 1.00    -0.4017)  ( 1.00    -0.3665)  ( 1.00    -0.3444)  ( 1.00    -0.3391)
                     ( 1.00    -0.3133)  ( 1.00    -0.2053)  ( 0.00    -0.0609)
 ***** SPIN 2 *****
 orbitals (Q,E):
 ---------------
 A :7...17           ( 1.00    -0.6488)  ( 1.00    -0.4800)  ( 1.00    -0.4217)  ( 1.00    -0.4132)
                     ( 1.00    -0.4017)  ( 1.00    -0.3665)  ( 1.00    -0.3444)  ( 1.00    -0.3391)
                     ( 1.00    -0.3133)  ( 1.00    -0.2053)  ( 0.00    -0.0609)
  
 Spin polar: 0 (Spin_A minus Spin_B electrons)

 CYCLE   13
  SDIIS (wt  1.000): -0.0000  0.0000 -0.0000 -0.0000 -0.0001 -0.0001  0.0011  0.0109  0.1248  0.8634
  DIIS coefficients: -0.0000  0.0000 -0.0000 -0.0000 -0.0001 -0.0001  0.0011  0.0109  0.1248  0.8634
 SCF Error: norm([F,P])=      0.000000155129, max([F,P])=      0.000000016573
 ***** SPIN 1 *****
 orbitals (Q,E):
 ---------------
 A :7...17           ( 1.00    -0.6488)  ( 1.00    -0.4800)  ( 1.00    -0.4217)  ( 1.00    -0.4132)
                     ( 1.00    -0.4017)  ( 1.00    -0.3665)  ( 1.00    -0.3444)  ( 1.00    -0.3391)
                     ( 1.00    -0.3133)  ( 1.00    -0.2053)  ( 0.00    -0.0609)
 ***** SPIN 2 *****
 orbitals (Q,E):
 ---------------
 A :7...17           ( 1.00    -0.6488)  ( 1.00    -0.4800)  ( 1.00    -0.4217)  ( 1.00    -0.4132)
                     ( 1.00    -0.4017)  ( 1.00    -0.3665)  ( 1.00    -0.3444)  ( 1.00    -0.3391)
                     ( 1.00    -0.3133)  ( 1.00    -0.2053)  ( 0.00    -0.0609)
  
 Spin polar: 0 (Spin_A minus Spin_B electrons)

 CYCLE   14
  SDIIS (wt  1.000): -0.0000 -0.0000 -0.0000 -0.0000 -0.0001 -0.0002 -0.0001  0.0083  0.1059  0.8861
  DIIS coefficients: -0.0000 -0.0000 -0.0000 -0.0000 -0.0001 -0.0002 -0.0001  0.0083  0.1059  0.8861
 SCF Error: norm([F,P])=      0.000000033512, max([F,P])=      0.000000005965
 ***** SPIN 1 *****
 orbitals (Q,E):
 ---------------
 A :7...17           ( 1.00    -0.6488)  ( 1.00    -0.4800)  ( 1.00    -0.4217)  ( 1.00    -0.4132)
                     ( 1.00    -0.4017)  ( 1.00    -0.3665)  ( 1.00    -0.3444)  ( 1.00    -0.3391)
                     ( 1.00    -0.3133)  ( 1.00    -0.2053)  ( 0.00    -0.0609)
 ***** SPIN 2 *****
 orbitals (Q,E):
 ---------------
 A :7...17           ( 1.00    -0.6488)  ( 1.00    -0.4800)  ( 1.00    -0.4217)  ( 1.00    -0.4132)
                     ( 1.00    -0.4017)  ( 1.00    -0.3665)  ( 1.00    -0.3444)  ( 1.00    -0.3391)
                     ( 1.00    -0.3133)  ( 1.00    -0.2053)  ( 0.00    -0.0609)
  
 Spin polar: 0 (Spin_A minus Spin_B electrons)

 SCF CONVERGED

 CYCLE   15
 *** Setting up for NEW gradients in Focky
 *** Using FIT density in Focky
 ***** SPIN 1 *****
 orbitals (Q,E):
 ---------------
 A :7...26           ( 1.00    -0.6488)  ( 1.00    -0.4800)  ( 1.00    -0.4217)  ( 1.00    -0.4132)
                     ( 1.00    -0.4017)  ( 1.00    -0.3665)  ( 1.00    -0.3444)  ( 1.00    -0.3391)
                     ( 1.00    -0.3133)  ( 1.00    -0.2053)  ( 0.00    -0.0609)  ( 0.00    -0.0139)
                     ( 0.00     0.0270)  ( 0.00     0.0392)  ( 0.00     0.0466)  ( 0.00     0.0737)
                     ( 0.00     0.0821)  ( 0.00     0.0841)  ( 0.00     0.1156)  ( 0.00     0.1548)
 ***** SPIN 2 *****
 orbitals (Q,E):
 ---------------
 A :7...26           ( 1.00    -0.6488)  ( 1.00    -0.4800)  ( 1.00    -0.4217)  ( 1.00    -0.4132)
                     ( 1.00    -0.4017)  ( 1.00    -0.3665)  ( 1.00    -0.3444)  ( 1.00    -0.3391)
                     ( 1.00    -0.3133)  ( 1.00    -0.2053)  ( 0.00    -0.0609)  ( 0.00    -0.0139)
                     ( 0.00     0.0270)  ( 0.00     0.0392)  ( 0.00     0.0466)  ( 0.00     0.0737)
                     ( 0.00     0.0821)  ( 0.00     0.0841)  ( 0.00     0.1156)  ( 0.00     0.1548)
  
 Spin polar: 0 (Spin_A minus Spin_B electrons)


 Fit test: (difference of exact and fit density, squared integrated, result summed over spins)
         SCF:                                          0.00001077308035

 Gross Charges per Atom (Z minus electrons)
 ==========================================
             0.4555    0.4663    0.4663   -0.4926   -0.1495   -0.1487   -0.1495   -0.1495   -0.1495   -0.1487
 Net Total: -0.00000000


 =================================================================
 M U L T I P O L E   D E R I V E D   C H A R G E   A N A L Y S I S
 =================================================================

 See: M. Swart, P.Th. van Duijnen, J.G. Snijders, J.Comput.Chem., (2001), p. 79-88.

 ----------------------------------------------------- 
 MDC atomic charges (includes spinA + spinB electrons)
 ----------------------------------------------------- 

        Atom    Level:     MDC-m        MDC-d        MDC-q
 ---------------------------------------------------------
     1     C            0.244765     0.307355     0.471734
     2     C            0.207636     0.173368     0.326566
     3     C            0.207636     0.173368     0.326566
     4     O           -0.369328    -0.474504    -0.574565
     5     H           -0.051596    -0.039608    -0.108808
     6     H           -0.042163    -0.010578    -0.057534
     7     H           -0.051596    -0.039608    -0.108808
     8     H           -0.051596    -0.039608    -0.108808
     9     H           -0.051596    -0.039608    -0.108808
    10     H           -0.042163    -0.010578    -0.057534

 -------------------------------- 
 MDC spin density (spinA - spinB)
 -------------------------------- 

        Atom    Level:     MDC-m        MDC-d        MDC-q
 ---------------------------------------------------------
     1     C            0.000000     0.000000    -0.000000
     2     C            0.000000     0.000000     0.000000
     3     C           -0.000000    -0.000000     0.000000
     4     O           -0.000000     0.000000     0.000000
     5     H           -0.000000    -0.000000    -0.000000
     6     H           -0.000000    -0.000000    -0.000000
     7     H           -0.000000    -0.000000    -0.000000
     8     H            0.000000     0.000000     0.000000
     9     H           -0.000000    -0.000000     0.000000
    10     H           -0.000000    -0.000000    -0.000000


 ==========
 S**2 value  ***  see also R. Bulo et al., J.Am.Chem.Soc., 124 (2002) 13903-13910, note (29)  ***
 ==========
  
                                       exact      expectation value

 Total S2 (S squared)                  0.00000            -0.00000


 =======================================
 OCCUPIED-VIRTUAL DIPOLE MATRIX ELEMENTS  ***  (numeric integrals)  ***
 =======================================
  

**************************************************************************
*                                                                        *
*        EXCITATION ENERGY CALCULATION, a part of the ADF-RESPONSE code  *
*                                                                        *
*        RESPONSE, extension of the ADF program for linear and nonlinear *
*        response calculations, by:                                      *
*        S.J.A. van Gisbergen, J.G. Snijders and E.J. Baerends,          *
*                   with contributions by:                               *
*        J.A. Groeneveld, F. Kootstra, and V.P. Osinga                   *
*              version of February 1999, in ADF99                        *
*                                                                        *
*        The most extensive description of the used algorithms is        *
*        given in: S.J.A. van Gisbergen, J.G. Snijders, E.J. Baerends    *
*                  Comp. Phys. Commun. 118 (1999) p.119-138              *
*        and in: S.J.A. van Gisbergen, Ph.D. thesis Amsterdam (1998)     *
*                                                                        *
**************************************************************************


**************************************************************************
*                                                                        *
*             Data for EXCITATION program part                           *
*                                                                        *
* Relevant references are:                                               *
*   S.J.A. van Gisbergen, J.G. Snijders, E.J. Baerends,                  *
*     Comput. Phys. Commun. 118, p.119 (1999)                            *
*   S.J.A. van Gisbergen, F. Kootstra, P.R.T. Schipper, O.V. Gritsenko,  *
*   J. G. Snijders, E.J. Baerends, Phys. Rev. A57 p.2556 (1998)          *
*                                                                        *
*   Ch. Jamorski, M.E. Casida, and D.R. Salahub                          *
*        J. Chem. Phys. 104, p.5134 (1996)                               *
*   R. Bauernschmitt and R. Ahlrichs Chem. Phys. Lett. 256, p.454 (1996) *
*                                                                        *
*   Maximum number of cycles in Davidson part, ndvcyc =              200 *
*                                                                        *
*   The exchange correlation kernel f_xc which is used, is               *
*   Adiabatic LDA, which is frequency-independent.                       *
*                                                                        *
*   Tails of functions are neglected                                     *
*         tailbas =    0.1000000000E-15                                  *
*         tailfit =    0.1000000000E-15                                  *
*   Dipole-allowed irreps are = A                                        *
*                               A                                        *
*                               A                                        *
*                                                                        *
*   Nr of excitation energies per irrep to be calculated                 *
*   Excitations calculated with the davidson method                      *
*       4 of     4928 excitations in irrep A    column   1               *
*                                                                        *
**************************************************************************

 The Clebsch-Gordan series for each direct product
                               A
                         -------
 A * A                        X


**************************************************************************
*****  STARTING CALCULATION OF SPIN-UNRESTRICTED EXCITATION ENERGIES  ******
**************************************************************************


Eigenvalues of small (approximate) problem
   i, eigenvalue(i) in dvdson     1    0.1354701336E+00
   i, eigenvalue(i) in dvdson     2    0.1563779393E+00
   i, eigenvalue(i) in dvdson     3    0.1902124443E+00
   i, eigenvalue(i) in dvdson     4    0.1925409207E+00
Eigenvalues of small (approximate) problem
   i, eigenvalue(i) in dvdson     1    0.1346824624E+00
   i, eigenvalue(i) in dvdson     2    0.1545886602E+00
   i, eigenvalue(i) in dvdson     3    0.1900573948E+00
   i, eigenvalue(i) in dvdson     4    0.1920989744E+00
Eigenvalues of small (approximate) problem
   i, eigenvalue(i) in dvdson     1    0.1346819273E+00
   i, eigenvalue(i) in dvdson     2    0.1544990204E+00
   i, eigenvalue(i) in dvdson     3    0.1900564034E+00
   i, eigenvalue(i) in dvdson     4    0.1920909519E+00
Eigenvalues of small (approximate) problem
   i, eigenvalue(i) in dvdson     1    0.1346819240E+00
   i, eigenvalue(i) in dvdson     2    0.1544989598E+00
   i, eigenvalue(i) in dvdson     3    0.1900563892E+00
   i, eigenvalue(i) in dvdson     4    0.1920904754E+00


**************************************************************************
*                                                                        *
*   Final excitation energies from Davidson algorithm                    *
*                                                                        *
**************************************************************************

    Number of loops in Davidson routine     =    4                    
    Number of matrix-vector multiplications =   16                    
    Type of excitations = SPIN-UNRESTRICTED                                 
                                                                          

 Symmetry A    

 Excitation energies E in a.u. and eV, dE wrt prev. cycle,
 oscillator strengths f in a.u.

 no.  E/a.u.        E/eV      f           dE/a.u.
 -----------------------------------------------------
   1 0.13468      3.6649     0.15161E-27  0.91E-09
   2 0.15450      4.2041     0.57546E-18  0.19E-07
   3 0.19006      5.1717     0.83815E-24  0.54E-08
   4 0.19209      5.2270     0.28526E-01  0.18E-06
 
 Transition dipole moments mu (x,y,z) in a.u.
 (weak excitations are not printed)

 no.  E/eV          f                       mu (x,y,z)
 ------------------------------------------------------------------
   4  5.2270     0.28526E-01  0.47197     -0.16439E-08  0.16042E-08
 
                                                        
 Major MO -> MO transitions for the above excitations   
                                                        
    Excitation  Occupied to virtual  Contribution       

     Nr.          orbitals           weight        contributions to     
                                     (sum=1) transition dipole moment   
                                              x       y       z       


     1: Alph  16a     ->  17a        0.4998
     1: Beta  16a     ->  17a        0.4998


     2: Beta  16a     ->  17a        0.4996
     2: Alph  16a     ->  17a        0.4996


     3: Beta  16a     ->  18a        0.4999  0.2600  0.0000  0.0000
     3: Alph  16a     ->  18a        0.4999 -0.2600 -0.0000 -0.0000


     4: Alph  16a     ->  18a        0.4998  0.2586  0.0000  0.0000
     4: Beta  16a     ->  18a        0.4998  0.2586  0.0000  0.0000
 

 All SPIN-UNRESTRICTED excitation energies 

 no.     E/a.u.        E/eV      f           Symmetry
 -----------------------------------------------------
   1:     0.13468      3.66488   0.1516E-27  A           
   2:     0.15450      4.20413   0.5755E-18  A           
   3:     0.19006      5.17170   0.8381E-24  A           
   4:     0.19209      5.22705   0.2853E-01  A           


 Normal termination of EXCITATION program part


 *** Using NEW gradient routines ***

 *** Calculating Gradients of Excitation Energy ***

 Relevent references:
    C. Van Caille and R. D. Amos, Chem. Phys. Lett. 308,249 (1999) and 317,159 (2000)
    F. Furche and R. Ahlrichs, J. Chem. Phys. 117,7433 (2002)
    M. Seth, G. Mazur,  T. Ziegler, Theor. Chem. Acc., 129, 331 (2011) 


   ---Begin solution of CPKS Equations--
   Real perturbation
Iter    5 Error   0.000525
  CPKS converged. Remaining residual is  0.0000134

 *** Finished Excitation Energy Gradients ***


 Geometry CYCLE 1
 ==============

 Energy gradients wrt nuclear displacements
 ==========================================

     Atom      Cartesian (a.u./angstrom)
                 X         Y         Z
 ----------------------------------------
     1 C     0.000000  0.000000 -0.221875
     2 C     0.007320 -0.000000  0.012067
     3 C    -0.007320  0.000000  0.012067
     4 O     0.000000  0.000000  0.235877
     5 H    -0.004566  0.003649 -0.003633
     6 H     0.012394  0.000000 -0.011801
     7 H    -0.004567 -0.003649 -0.003633
     8 H     0.004566 -0.003649 -0.003633
     9 H     0.004567  0.003649 -0.003633
    10 H    -0.012394 -0.000000 -0.011801
 ----------------------------------------
 
----------------------------------------------------------------------
Geometry Convergence after Step   1       (Hartree/Angstrom,Angstrom)
----------------------------------------------------------------------
current energy                               -1.89836741 Hartree
energy change                      -1.89836741     0.00100000    F
constrained gradient max            0.23587703     0.00100000    F
constrained gradient rms            0.05945314     0.00066667    F
gradient max                        0.23587703
gradient rms                        0.05945314
cart. step max                      0.10365574     0.01000000    F
cart. step rms                      0.03227977     0.00666667    F
 


 Coordinates (Cartesian)
 =======================

     Atom                    bohr                                 angstrom                 Geometric Variables
                   X           Y           Z              X           Y           Z       (0:frozen, *:LT par.)
 --------------------------------------------------------------------------------------------------------------
     1 C      -0.000001   -0.000001   -1.055029      -0.000000   -0.000001   -0.558297      1       2       3
     2 C      -2.455323    0.000017    0.371384      -1.299301    0.000009    0.196528      4       5       6
     3 C       2.455359    0.000015    0.371320       1.299320    0.000008    0.196494      7       8       9
     4 O      -0.000035   -0.000031   -3.622710      -0.000018   -0.000017   -1.917056     10      11      12
     5 H       2.602362    1.694392    1.597854       1.377111    0.896634    0.845548     13      14      15
     6 H       4.065682    0.000009   -0.939758       2.151466    0.000005   -0.497298     16      17      18
     7 H       2.602371   -1.694342    1.597880       1.377116   -0.896607    0.845562     19      20      21
     8 H      -2.602295   -1.694331    1.597962      -1.377075   -0.896601    0.845605     22      23      24
     9 H      -2.602301    1.694404    1.597908      -1.377078    0.896640    0.845577     25      26      27
    10 H      -4.065681   -0.000005   -0.939650      -2.151466   -0.000003   -0.497241     28      29      30
 --------------------------------------------------------------------------------------------------------------

 Number of elements of the density matrix on this node (used, total):      1329     18528


 ===========================================
 Numerical Integration : Fuzzy Cells (Becke)
 ===========================================
  
 Becke grid quality: GOOD           
  
 Lebedev angular grid order:             min:  11 max:  31
 Nr. of radial points:                   min:  54 max:  61

 Total nr. of points:     122548
 Nr. of blocks:              958
 Block length:               128
 Nr. of dummy points:         76


 Test of Precision of the Numerical Integration Grid
 ===================================================

 Integral of the Total Core Density:                   0.00000000000000


 ========================
 Density Fitting (zlmFit)
 ========================
  
 ZlmFit Fit Quality: GOOD           
  
 Max L-expansion:                        min:   8 max:   9
 Nr. of radial interpolation points:     min:  78 max: 108


 =====
 S C F  ***  ScaSCF  ***
 =====
  
 Initial density matrix is taken from previous geometry

 CYCLE    1
 SCF Error: norm([F,P])=      0.550649025858, max([F,P])=      0.127434594210
 ***** SPIN 1 *****
 orbitals (Q,E):
 ---------------
 A :7...26           ( 1.00    -0.6739)  ( 1.00    -0.5172)  ( 1.00    -0.4411)  ( 1.00    -0.4351)
                     ( 1.00    -0.4316)  ( 1.00    -0.3854)  ( 1.00    -0.3663)  ( 1.00    -0.3620)
                     ( 1.00    -0.3306)  ( 1.00    -0.2498)  ( 0.00    -0.1321)  ( 0.00    -0.0302)
                     ( 0.00     0.0120)  ( 0.00     0.0232)  ( 0.00     0.0299)  ( 0.00     0.0588)
                     ( 0.00     0.0642)  ( 0.00     0.0663)  ( 0.00     0.0814)  ( 0.00     0.1358)
 ***** SPIN 2 *****
 orbitals (Q,E):
 ---------------
 A :7...26           ( 1.00    -0.6739)  ( 1.00    -0.5172)  ( 1.00    -0.4411)  ( 1.00    -0.4351)
                     ( 1.00    -0.4316)  ( 1.00    -0.3854)  ( 1.00    -0.3663)  ( 1.00    -0.3620)
                     ( 1.00    -0.3306)  ( 1.00    -0.2498)  ( 0.00    -0.1321)  ( 0.00    -0.0302)
                     ( 0.00     0.0120)  ( 0.00     0.0232)  ( 0.00     0.0299)  ( 0.00     0.0588)
                     ( 0.00     0.0642)  ( 0.00     0.0663)  ( 0.00     0.0814)  ( 0.00     0.1358)
  
 Spin polar: 0 (Spin_A minus Spin_B electrons)

 CYCLE    2
  SDIIS (wt  0.000):  0.1008  0.8992
 A-DIIS (wt  1.000):  0.0000  1.0000
  DIIS coefficients:  0.0000  1.0000
 SCF Error: norm([F,P])=      0.167158202891, max([F,P])=      0.017840718031
 ***** SPIN 1 *****
 orbitals (Q,E):
 ---------------
 A :7...17           ( 1.00    -0.6511)  ( 1.00    -0.4796)  ( 1.00    -0.4135)  ( 1.00    -0.3950)
                     ( 1.00    -0.3935)  ( 1.00    -0.3752)  ( 1.00    -0.3356)  ( 1.00    -0.3032)
                     ( 1.00    -0.2457)  ( 1.00    -0.1627)  ( 0.00    -0.0557)
 ***** SPIN 2 *****
 orbitals (Q,E):
 ---------------
 A :7...17           ( 1.00    -0.6511)  ( 1.00    -0.4796)  ( 1.00    -0.4135)  ( 1.00    -0.3950)
                     ( 1.00    -0.3935)  ( 1.00    -0.3752)  ( 1.00    -0.3356)  ( 1.00    -0.3032)
                     ( 1.00    -0.2457)  ( 1.00    -0.1627)  ( 0.00    -0.0557)
  
 Spin polar: 0 (Spin_A minus Spin_B electrons)

 CYCLE    3
  SDIIS (wt  0.000):  0.0180  0.6372  0.3448
 A-DIIS (wt  1.000):  0.0000  0.7026  0.2974
  DIIS coefficients:  0.0000  0.7026  0.2974
 SCF Error: norm([F,P])=      0.295916978553, max([F,P])=      0.042135918133
 ***** SPIN 1 *****
 orbitals (Q,E):
 ---------------
 A :7...17           ( 1.00    -0.6505)  ( 1.00    -0.4886)  ( 1.00    -0.4140)  ( 1.00    -0.4026)
                     ( 1.00    -0.4013)  ( 1.00    -0.3698)  ( 1.00    -0.3393)  ( 1.00    -0.3322)
                     ( 1.00    -0.2812)  ( 1.00    -0.2021)  ( 0.00    -0.0830)
 ***** SPIN 2 *****
 orbitals (Q,E):
 ---------------
 A :7...17           ( 1.00    -0.6505)  ( 1.00    -0.4886)  ( 1.00    -0.4140)  ( 1.00    -0.4026)
                     ( 1.00    -0.4013)  ( 1.00    -0.3698)  ( 1.00    -0.3393)  ( 1.00    -0.3322)
                     ( 1.00    -0.2812)  ( 1.00    -0.2021)  ( 0.00    -0.0830)
  
 Spin polar: 0 (Spin_A minus Spin_B electrons)

 CYCLE    4
  SDIIS (wt  0.845):  0.4501  0.2225  0.3274
 A-DIIS (wt  0.155):  0.1807  0.0000  0.8193
  DIIS coefficients:  0.4084  0.1881  0.4035
 SCF Error: norm([F,P])=      0.106841873024, max([F,P])=      0.016324137559
 ***** SPIN 1 *****
 orbitals (Q,E):
 ---------------
 A :7...17           ( 1.00    -0.6549)  ( 1.00    -0.4938)  ( 1.00    -0.4185)  ( 1.00    -0.4079)
                     ( 1.00    -0.4051)  ( 1.00    -0.3716)  ( 1.00    -0.3438)  ( 1.00    -0.3342)
                     ( 1.00    -0.2840)  ( 1.00    -0.2017)  ( 0.00    -0.0912)
 ***** SPIN 2 *****
 orbitals (Q,E):
 ---------------
 A :7...17           ( 1.00    -0.6549)  ( 1.00    -0.4938)  ( 1.00    -0.4185)  ( 1.00    -0.4079)
                     ( 1.00    -0.4051)  ( 1.00    -0.3716)  ( 1.00    -0.3438)  ( 1.00    -0.3342)
                     ( 1.00    -0.2840)  ( 1.00    -0.2017)  ( 0.00    -0.0912)
  
 Spin polar: 0 (Spin_A minus Spin_B electrons)

 CYCLE    5
  SDIIS (wt  0.864):  0.1508  0.0174  0.3787  0.4531
 A-DIIS (wt  0.136):  0.0000  0.0000  0.3741  0.6259
  DIIS coefficients:  0.1303  0.0151  0.3780  0.4766
 SCF Error: norm([F,P])=      0.075920706647, max([F,P])=      0.014449134357
 ***** SPIN 1 *****
 orbitals (Q,E):
 ---------------
 A :7...17           ( 1.00    -0.6532)  ( 1.00    -0.4925)  ( 1.00    -0.4169)  ( 1.00    -0.4065)
                     ( 1.00    -0.4053)  ( 1.00    -0.3700)  ( 1.00    -0.3424)  ( 1.00    -0.3360)
                     ( 1.00    -0.2873)  ( 1.00    -0.2065)  ( 0.00    -0.0912)
 ***** SPIN 2 *****
 orbitals (Q,E):
 ---------------
 A :7...17           ( 1.00    -0.6532)  ( 1.00    -0.4925)  ( 1.00    -0.4169)  ( 1.00    -0.4065)
                     ( 1.00    -0.4053)  ( 1.00    -0.3700)  ( 1.00    -0.3424)  ( 1.00    -0.3360)
                     ( 1.00    -0.2873)  ( 1.00    -0.2065)  ( 0.00    -0.0912)
  
 Spin polar: 0 (Spin_A minus Spin_B electrons)

 CYCLE    6
  SDIIS (wt  0.995):  0.0359  0.0120  0.1006  0.1786  0.6728
 A-DIIS (wt  0.005):  0.0000  0.0000  0.0000  0.0000  1.0000
  DIIS coefficients:  0.0357  0.0120  0.1001  0.1777  0.6744
 SCF Error: norm([F,P])=      0.009150710234, max([F,P])=      0.001501113846
 ***** SPIN 1 *****
 orbitals (Q,E):
 ---------------
 A :7...17           ( 1.00    -0.6534)  ( 1.00    -0.4925)  ( 1.00    -0.4171)  ( 1.00    -0.4065)
                     ( 1.00    -0.4051)  ( 1.00    -0.3704)  ( 1.00    -0.3424)  ( 1.00    -0.3356)
                     ( 1.00    -0.2867)  ( 1.00    -0.2057)  ( 0.00    -0.0909)
 ***** SPIN 2 *****
 orbitals (Q,E):
 ---------------
 A :7...17           ( 1.00    -0.6534)  ( 1.00    -0.4925)  ( 1.00    -0.4171)  ( 1.00    -0.4065)
                     ( 1.00    -0.4051)  ( 1.00    -0.3704)  ( 1.00    -0.3424)  ( 1.00    -0.3356)
                     ( 1.00    -0.2867)  ( 1.00    -0.2057)  ( 0.00    -0.0909)
  
 Spin polar: 0 (Spin_A minus Spin_B electrons)

 CYCLE    7
  SDIIS (wt  1.000):  0.0040  0.0027  0.0133  0.0332  0.2167  0.7302
  DIIS coefficients:  0.0040  0.0027  0.0133  0.0332  0.2167  0.7302
 SCF Error: norm([F,P])=      0.000440952495, max([F,P])=      0.000033305317
 ***** SPIN 1 *****
 orbitals (Q,E):
 ---------------
 A :7...17           ( 1.00    -0.6534)  ( 1.00    -0.4925)  ( 1.00    -0.4171)  ( 1.00    -0.4065)
                     ( 1.00    -0.4051)  ( 1.00    -0.3704)  ( 1.00    -0.3424)  ( 1.00    -0.3356)
                     ( 1.00    -0.2867)  ( 1.00    -0.2057)  ( 0.00    -0.0909)
 ***** SPIN 2 *****
 orbitals (Q,E):
 ---------------
 A :7...17           ( 1.00    -0.6534)  ( 1.00    -0.4925)  ( 1.00    -0.4171)  ( 1.00    -0.4065)
                     ( 1.00    -0.4051)  ( 1.00    -0.3704)  ( 1.00    -0.3424)  ( 1.00    -0.3356)
                     ( 1.00    -0.2867)  ( 1.00    -0.2057)  ( 0.00    -0.0909)
  
 Spin polar: 0 (Spin_A minus Spin_B electrons)

 CYCLE    8
  SDIIS (wt  1.000):  0.0000  0.0004  0.0004  0.0026  0.0290  0.1689  0.7987
  DIIS coefficients:  0.0000  0.0004  0.0004  0.0026  0.0290  0.1689  0.7987
 SCF Error: norm([F,P])=      0.000065450269, max([F,P])=      0.000005205352
 ***** SPIN 1 *****
 orbitals (Q,E):
 ---------------
 A :7...17           ( 1.00    -0.6534)  ( 1.00    -0.4925)  ( 1.00    -0.4171)  ( 1.00    -0.4065)
                     ( 1.00    -0.4051)  ( 1.00    -0.3704)  ( 1.00    -0.3424)  ( 1.00    -0.3356)
                     ( 1.00    -0.2867)  ( 1.00    -0.2057)  ( 0.00    -0.0909)
 ***** SPIN 2 *****
 orbitals (Q,E):
 ---------------
 A :7...17           ( 1.00    -0.6534)  ( 1.00    -0.4925)  ( 1.00    -0.4171)  ( 1.00    -0.4065)
                     ( 1.00    -0.4051)  ( 1.00    -0.3704)  ( 1.00    -0.3424)  ( 1.00    -0.3356)
                     ( 1.00    -0.2867)  ( 1.00    -0.2057)  ( 0.00    -0.0909)
  
 Spin polar: 0 (Spin_A minus Spin_B electrons)

 CYCLE    9
  SDIIS (wt  1.000): -0.0000  0.0001 -0.0000  0.0004  0.0075  0.0610  0.4093  0.5218
  DIIS coefficients: -0.0000  0.0001 -0.0000  0.0004  0.0075  0.0610  0.4093  0.5218
 SCF Error: norm([F,P])=      0.000032019903, max([F,P])=      0.000004227081
 ***** SPIN 1 *****
 orbitals (Q,E):
 ---------------
 A :7...17           ( 1.00    -0.6534)  ( 1.00    -0.4925)  ( 1.00    -0.4171)  ( 1.00    -0.4065)
                     ( 1.00    -0.4051)  ( 1.00    -0.3704)  ( 1.00    -0.3424)  ( 1.00    -0.3356)
                     ( 1.00    -0.2867)  ( 1.00    -0.2057)  ( 0.00    -0.0909)
 ***** SPIN 2 *****
 orbitals (Q,E):
 ---------------
 A :7...17           ( 1.00    -0.6534)  ( 1.00    -0.4925)  ( 1.00    -0.4171)  ( 1.00    -0.4065)
                     ( 1.00    -0.4051)  ( 1.00    -0.3704)  ( 1.00    -0.3424)  ( 1.00    -0.3356)
                     ( 1.00    -0.2867)  ( 1.00    -0.2057)  ( 0.00    -0.0909)
  
 Spin polar: 0 (Spin_A minus Spin_B electrons)

 CYCLE   10
  SDIIS (wt  1.000): -0.0000  0.0000 -0.0000 -0.0001  0.0007  0.0099  0.0861  0.2248  0.6786
  DIIS coefficients: -0.0000  0.0000 -0.0000 -0.0001  0.0007  0.0099  0.0861  0.2248  0.6786
 SCF Error: norm([F,P])=      0.000009400408, max([F,P])=      0.000001482316
 ***** SPIN 1 *****
 orbitals (Q,E):
 ---------------
 A :7...17           ( 1.00    -0.6534)  ( 1.00    -0.4925)  ( 1.00    -0.4171)  ( 1.00    -0.4065)
                     ( 1.00    -0.4051)  ( 1.00    -0.3704)  ( 1.00    -0.3424)  ( 1.00    -0.3356)
                     ( 1.00    -0.2867)  ( 1.00    -0.2057)  ( 0.00    -0.0909)
 ***** SPIN 2 *****
 orbitals (Q,E):
 ---------------
 A :7...17           ( 1.00    -0.6534)  ( 1.00    -0.4925)  ( 1.00    -0.4171)  ( 1.00    -0.4065)
                     ( 1.00    -0.4051)  ( 1.00    -0.3704)  ( 1.00    -0.3424)  ( 1.00    -0.3356)
                     ( 1.00    -0.2867)  ( 1.00    -0.2057)  ( 0.00    -0.0909)
  
 Spin polar: 0 (Spin_A minus Spin_B electrons)

 CYCLE   11
  SDIIS (wt  1.000): -0.0000  0.0000 -0.0000 -0.0000  0.0001  0.0014  0.0121  0.0411  0.1340  0.8113
  DIIS coefficients: -0.0000  0.0000 -0.0000 -0.0000  0.0001  0.0014  0.0121  0.0411  0.1340  0.8113
 SCF Error: norm([F,P])=      0.000000728954, max([F,P])=      0.000000126729
 ***** SPIN 1 *****
 orbitals (Q,E):
 ---------------
 A :7...17           ( 1.00    -0.6534)  ( 1.00    -0.4925)  ( 1.00    -0.4171)  ( 1.00    -0.4065)
                     ( 1.00    -0.4051)  ( 1.00    -0.3704)  ( 1.00    -0.3424)  ( 1.00    -0.3356)
                     ( 1.00    -0.2867)  ( 1.00    -0.2057)  ( 0.00    -0.0909)
 ***** SPIN 2 *****
 orbitals (Q,E):
 ---------------
 A :7...17           ( 1.00    -0.6534)  ( 1.00    -0.4925)  ( 1.00    -0.4171)  ( 1.00    -0.4065)
                     ( 1.00    -0.4051)  ( 1.00    -0.3704)  ( 1.00    -0.3424)  ( 1.00    -0.3356)
                     ( 1.00    -0.2867)  ( 1.00    -0.2057)  ( 0.00    -0.0909)
  
 Spin polar: 0 (Spin_A minus Spin_B electrons)

 CYCLE   12
  SDIIS (wt  1.000):  0.0000  0.0000 -0.0000  0.0000  0.0001  0.0009  0.0055  0.0204  0.2293  0.7438
  DIIS coefficients:  0.0000  0.0000 -0.0000  0.0000  0.0001  0.0009  0.0055  0.0204  0.2293  0.7438
 SCF Error: norm([F,P])=      0.000000070071, max([F,P])=      0.000000005331
 ***** SPIN 1 *****
 orbitals (Q,E):
 ---------------
 A :7...17           ( 1.00    -0.6534)  ( 1.00    -0.4925)  ( 1.00    -0.4171)  ( 1.00    -0.4065)
                     ( 1.00    -0.4051)  ( 1.00    -0.3704)  ( 1.00    -0.3424)  ( 1.00    -0.3356)
                     ( 1.00    -0.2867)  ( 1.00    -0.2057)  ( 0.00    -0.0909)
 ***** SPIN 2 *****
 orbitals (Q,E):
 ---------------
 A :7...17           ( 1.00    -0.6534)  ( 1.00    -0.4925)  ( 1.00    -0.4171)  ( 1.00    -0.4065)
                     ( 1.00    -0.4051)  ( 1.00    -0.3704)  ( 1.00    -0.3424)  ( 1.00    -0.3356)
                     ( 1.00    -0.2867)  ( 1.00    -0.2057)  ( 0.00    -0.0909)
  
 Spin polar: 0 (Spin_A minus Spin_B electrons)

 SCF CONVERGED

 CYCLE   13
 *** Setting up for NEW gradients in Focky
 *** Using FIT density in Focky
 ***** SPIN 1 *****
 orbitals (Q,E):
 ---------------
 A :7...26           ( 1.00    -0.6534)  ( 1.00    -0.4925)  ( 1.00    -0.4171)  ( 1.00    -0.4065)
                     ( 1.00    -0.4051)  ( 1.00    -0.3704)  ( 1.00    -0.3424)  ( 1.00    -0.3356)
                     ( 1.00    -0.2867)  ( 1.00    -0.2057)  ( 0.00    -0.0909)  ( 0.00    -0.0163)
                     ( 0.00     0.0241)  ( 0.00     0.0360)  ( 0.00     0.0458)  ( 0.00     0.0729)
                     ( 0.00     0.0782)  ( 0.00     0.0819)  ( 0.00     0.1030)  ( 0.00     0.1540)
 ***** SPIN 2 *****
 orbitals (Q,E):
 ---------------
 A :7...26           ( 1.00    -0.6534)  ( 1.00    -0.4925)  ( 1.00    -0.4171)  ( 1.00    -0.4065)
                     ( 1.00    -0.4051)  ( 1.00    -0.3704)  ( 1.00    -0.3424)  ( 1.00    -0.3356)
                     ( 1.00    -0.2867)  ( 1.00    -0.2057)  ( 0.00    -0.0909)  ( 0.00    -0.0163)
                     ( 0.00     0.0241)  ( 0.00     0.0360)  ( 0.00     0.0458)  ( 0.00     0.0729)
                     ( 0.00     0.0782)  ( 0.00     0.0819)  ( 0.00     0.1030)  ( 0.00     0.1540)
  
 Spin polar: 0 (Spin_A minus Spin_B electrons)


 Fit test: (difference of exact and fit density, squared integrated, result summed over spins)
         SCF:                                          0.00001043180837

 Gross Charges per Atom (Z minus electrons)
 ==========================================
             0.3827    0.4936    0.4936   -0.4985   -0.1442   -0.1473   -0.1442   -0.1442   -0.1442   -0.1473
 Net Total:  0.00000000


 =================================================================
 M U L T I P O L E   D E R I V E D   C H A R G E   A N A L Y S I S
 =================================================================

 See: M. Swart, P.Th. van Duijnen, J.G. Snijders, J.Comput.Chem., (2001), p. 79-88.

 ----------------------------------------------------- 
 MDC atomic charges (includes spinA + spinB electrons)
 ----------------------------------------------------- 

        Atom    Level:     MDC-m        MDC-d        MDC-q
 ---------------------------------------------------------
     1     C            0.258767     0.260370     0.357363
     2     C            0.213375     0.173602     0.263789
     3     C            0.213374     0.173602     0.263791
     4     O           -0.418595    -0.481277    -0.532644
     5     H           -0.046349    -0.028388    -0.072843
     6     H           -0.040761    -0.006373    -0.030467
     7     H           -0.046349    -0.028387    -0.072841
     8     H           -0.046349    -0.028388    -0.072841
     9     H           -0.046349    -0.028387    -0.072841
    10     H           -0.040761    -0.006373    -0.030467

 -------------------------------- 
 MDC spin density (spinA - spinB)
 -------------------------------- 

        Atom    Level:     MDC-m        MDC-d        MDC-q
 ---------------------------------------------------------
     1     C            0.000000     0.000000    -0.000000
     2     C           -0.000000    -0.000000     0.000000
     3     C            0.000000     0.000000    -0.000000
     4     O            0.000000     0.000000     0.000000
     5     H            0.000000     0.000000     0.000000
     6     H           -0.000000    -0.000000    -0.000000
     7     H            0.000000     0.000000     0.000000
     8     H            0.000000     0.000000    -0.000000
     9     H            0.000000     0.000000    -0.000000
    10     H            0.000000    -0.000000    -0.000000


 ==========
 S**2 value  ***  see also R. Bulo et al., J.Am.Chem.Soc., 124 (2002) 13903-13910, note (29)  ***
 ==========
  
                                       exact      expectation value

 Total S2 (S squared)                  0.00000             0.00000


 =======================================
 OCCUPIED-VIRTUAL DIPOLE MATRIX ELEMENTS  ***  (numeric integrals)  ***
 =======================================
  

**************************************************************************
*                                                                        *
*        EXCITATION ENERGY CALCULATION, a part of the ADF-RESPONSE code  *
*                                                                        *
*        RESPONSE, extension of the ADF program for linear and nonlinear *
*        response calculations, by:                                      *
*        S.J.A. van Gisbergen, J.G. Snijders and E.J. Baerends,          *
*                   with contributions by:                               *
*        J.A. Groeneveld, F. Kootstra, and V.P. Osinga                   *
*              version of February 1999, in ADF99                        *
*                                                                        *
*        The most extensive description of the used algorithms is        *
*        given in: S.J.A. van Gisbergen, J.G. Snijders, E.J. Baerends    *
*                  Comp. Phys. Commun. 118 (1999) p.119-138              *
*        and in: S.J.A. van Gisbergen, Ph.D. thesis Amsterdam (1998)     *
*                                                                        *
**************************************************************************


**************************************************************************
*                                                                        *
*             Data for EXCITATION program part                           *
*                                                                        *
* Relevant references are:                                               *
*   S.J.A. van Gisbergen, J.G. Snijders, E.J. Baerends,                  *
*     Comput. Phys. Commun. 118, p.119 (1999)                            *
*   S.J.A. van Gisbergen, F. Kootstra, P.R.T. Schipper, O.V. Gritsenko,  *
*   J. G. Snijders, E.J. Baerends, Phys. Rev. A57 p.2556 (1998)          *
*                                                                        *
*   Ch. Jamorski, M.E. Casida, and D.R. Salahub                          *
*        J. Chem. Phys. 104, p.5134 (1996)                               *
*   R. Bauernschmitt and R. Ahlrichs Chem. Phys. Lett. 256, p.454 (1996) *
*                                                                        *
*   Maximum number of cycles in Davidson part, ndvcyc =              200 *
*                                                                        *
*   The exchange correlation kernel f_xc which is used, is               *
*   Adiabatic LDA, which is frequency-independent.                       *
*                                                                        *
*   Tails of functions are neglected                                     *
*         tailbas =    0.1000000000E-15                                  *
*         tailfit =    0.1000000000E-15                                  *
*   Dipole-allowed irreps are = A                                        *
*                               A                                        *
*                               A                                        *
*                                                                        *
*   Nr of excitation energies per irrep to be calculated                 *
*   Excitations calculated with the davidson method                      *
*       4 of     4928 excitations in irrep A    column   1               *
*                                                                        *
**************************************************************************

 The Clebsch-Gordan series for each direct product
                               A
                         -------
 A * A                        X


**************************************************************************
*****  STARTING CALCULATION OF SPIN-UNRESTRICTED EXCITATION ENERGIES  ******
**************************************************************************


Eigenvalues of small (approximate) problem
   i, eigenvalue(i) in dvdson     1    0.1055632225E+00
   i, eigenvalue(i) in dvdson     2    0.1264476617E+00
   i, eigenvalue(i) in dvdson     3    0.1883302954E+00
   i, eigenvalue(i) in dvdson     4    0.1904628130E+00
Eigenvalues of small (approximate) problem
   i, eigenvalue(i) in dvdson     1    0.1047335586E+00
   i, eigenvalue(i) in dvdson     2    0.1249932085E+00
   i, eigenvalue(i) in dvdson     3    0.1881872989E+00
   i, eigenvalue(i) in dvdson     4    0.1900736793E+00
Eigenvalues of small (approximate) problem
   i, eigenvalue(i) in dvdson     1    0.1047331071E+00
   i, eigenvalue(i) in dvdson     2    0.1249258493E+00
   i, eigenvalue(i) in dvdson     3    0.1881866959E+00
   i, eigenvalue(i) in dvdson     4    0.1900610200E+00
Eigenvalues of small (approximate) problem
   i, eigenvalue(i) in dvdson     1    0.1047331041E+00
   i, eigenvalue(i) in dvdson     2    0.1249258084E+00
   i, eigenvalue(i) in dvdson     3    0.1881866854E+00
   i, eigenvalue(i) in dvdson     4    0.1900599208E+00


**************************************************************************
*                                                                        *
*   Final excitation energies from Davidson algorithm                    *
*                                                                        *
**************************************************************************

    Number of loops in Davidson routine     =    4                    
    Number of matrix-vector multiplications =   16                    
    Type of excitations = SPIN-UNRESTRICTED                                 
                                                                          

 Symmetry A    

 Excitation energies E in a.u. and eV, dE wrt prev. cycle,
 oscillator strengths f in a.u.

 no.  E/a.u.        E/eV      f           dE/a.u.
 -----------------------------------------------------
   1 0.10473      2.8499     0.25829E-25  0.64E-09
   2 0.12493      3.3994     0.46992E-11  0.10E-07
   3 0.18819      5.1208     0.31676E-18  0.39E-08
   4 0.19006      5.1718     0.23098E-01  0.42E-06
 
 Transition dipole moments mu (x,y,z) in a.u.
 (weak excitations are not printed)

 no.  E/eV          f                       mu (x,y,z)
 ------------------------------------------------------------------
   4  5.1718     0.23098E-01 -0.42696      0.31939E-06  0.16631E-02
 
                                                        
 Major MO -> MO transitions for the above excitations   
                                                        
    Excitation  Occupied to virtual  Contribution       

     Nr.          orbitals           weight        contributions to     
                                     (sum=1) transition dipole moment   
                                              x       y       z       


     1: Alph  16a     ->  17a        0.4998 -0.0000  0.0000 -0.0000
     1: Beta  16a     ->  17a        0.4998  0.0000 -0.0000  0.0000


     2: Beta  16a     ->  17a        0.4998 -0.0000  0.0000 -0.0000
     2: Alph  16a     ->  17a        0.4998 -0.0000  0.0000 -0.0000


     3: Alph  16a     ->  18a        0.4998  0.2432 -0.0000 -0.0000
     3: Beta  16a     ->  18a        0.4998 -0.2432  0.0000  0.0000


     4: Beta  16a     ->  18a        0.4997 -0.2420  0.0000  0.0000
     4: Alph  16a     ->  18a        0.4997 -0.2420  0.0000  0.0000
 

 All SPIN-UNRESTRICTED excitation energies 

 no.     E/a.u.        E/eV      f           Symmetry
 -----------------------------------------------------
   1:     0.10473      2.84993   0.2583E-25  A           
   2:     0.12493      3.39940   0.4699E-11  A           
   3:     0.18819      5.12082   0.3168E-18  A           
   4:     0.19006      5.17179   0.2310E-01  A           


 Normal termination of EXCITATION program part


 *** Using NEW gradient routines ***

 *** Calculating Gradients of Excitation Energy ***

 Relevent references:
    C. Van Caille and R. D. Amos, Chem. Phys. Lett. 308,249 (1999) and 317,159 (2000)
    F. Furche and R. Ahlrichs, J. Chem. Phys. 117,7433 (2002)
    M. Seth, G. Mazur,  T. Ziegler, Theor. Chem. Acc., 129, 331 (2011) 


   ---Begin solution of CPKS Equations--
   Real perturbation
Iter    5 Error   0.000708
  CPKS converged. Remaining residual is  0.0000147

 *** Finished Excitation Energy Gradients ***


 Geometry CYCLE 2
 ==============

 Energy gradients wrt nuclear displacements
 ==========================================

     Atom      Cartesian (a.u./angstrom)
                 X         Y         Z
 ----------------------------------------
     1 C    -0.000000 -0.000000 -0.011136
     2 C    -0.009425  0.000001  0.022830
     3 C     0.009426 -0.000000  0.022830
     4 O    -0.000000 -0.000000 -0.027576
     5 H    -0.000513  0.002965 -0.000165
     6 H     0.000200  0.000000 -0.003144
     7 H    -0.000513 -0.002964 -0.000165
     8 H     0.000513 -0.002965 -0.000165
     9 H     0.000513  0.002964 -0.000165
    10 H    -0.000200 -0.000000 -0.003144
 ----------------------------------------

 dE(predicted):    -0.16715E-01, dE(actual):    -0.12074E-01, Trust radius:    0.632456, all in a.u.
 
----------------------------------------------------------------------
Geometry Convergence after Step   2       (Hartree/Angstrom,Angstrom)
----------------------------------------------------------------------
current energy                               -1.91044169 Hartree
energy change                      -0.01207428     0.00100000    F
constrained gradient max            0.02757551     0.00100000    F
constrained gradient rms            0.00848669     0.00066667    F
gradient max                        0.02757551
gradient rms                        0.00848669
cart. step max                      0.02886553     0.01000000    F
cart. step rms                      0.01476655     0.00666667    F
 


 Coordinates (Cartesian)
 =======================

     Atom                    bohr                                 angstrom                 Geometric Variables
                   X           Y           Z              X           Y           Z       (0:frozen, *:LT par.)
 --------------------------------------------------------------------------------------------------------------
     1 C      -0.000001   -0.000001   -1.026349      -0.000000   -0.000001   -0.543120      1       2       3
     2 C      -2.469468    0.000015    0.335480      -1.306786    0.000008    0.177528      4       5       6
     3 C       2.469505    0.000014    0.335411       1.306806    0.000007    0.177492      7       8       9
     4 O      -0.000037   -0.000028   -3.575295      -0.000019   -0.000015   -1.891964     10      11      12
     5 H       2.643578    1.685888    1.565396       1.398921    0.892133    0.828372     13      14      15
     6 H       4.060126    0.000013   -0.994306       2.148526    0.000007   -0.526164     16      17      18
     7 H       2.643590   -1.685851    1.565408       1.398927   -0.892114    0.828378     19      20      21
     8 H      -2.643507   -1.685832    1.565507      -1.398884   -0.892104    0.828431     22      23      24
     9 H      -2.643516    1.685907    1.565444      -1.398888    0.892144    0.828397     25      26      27
    10 H      -4.060127   -0.000012   -0.994191      -2.148527   -0.000006   -0.526103     28      29      30
 --------------------------------------------------------------------------------------------------------------

 Number of elements of the density matrix on this node (used, total):      1329     18528


 ===========================================
 Numerical Integration : Fuzzy Cells (Becke)
 ===========================================
  
 Becke grid quality: GOOD           
  
 Lebedev angular grid order:             min:  11 max:  31
 Nr. of radial points:                   min:  54 max:  61

 Total nr. of points:     122554
 Nr. of blocks:              958
 Block length:               128
 Nr. of dummy points:         70


 Test of Precision of the Numerical Integration Grid
 ===================================================

 Integral of the Total Core Density:                   0.00000000000000


 ========================
 Density Fitting (zlmFit)
 ========================
  
 ZlmFit Fit Quality: GOOD           
  
 Max L-expansion:                        min:   8 max:   9
 Nr. of radial interpolation points:     min:  78 max: 108


 =====
 S C F  ***  ScaSCF  ***
 =====
  
 Initial density matrix is taken from previous geometry

 CYCLE    1
 SCF Error: norm([F,P])=      0.061872710732, max([F,P])=      0.007480161932
 ***** SPIN 1 *****
 orbitals (Q,E):
 ---------------
 A :7...26           ( 1.00    -0.6517)  ( 1.00    -0.4888)  ( 1.00    -0.4135)  ( 1.00    -0.4051)
                     ( 1.00    -0.4015)  ( 1.00    -0.3668)  ( 1.00    -0.3414)  ( 1.00    -0.3309)
                     ( 1.00    -0.2835)  ( 1.00    -0.2015)  ( 0.00    -0.0841)  ( 0.00    -0.0133)
                     ( 0.00     0.0261)  ( 0.00     0.0390)  ( 0.00     0.0485)  ( 0.00     0.0750)
                     ( 0.00     0.0797)  ( 0.00     0.0859)  ( 0.00     0.1077)  ( 0.00     0.1575)
 ***** SPIN 2 *****
 orbitals (Q,E):
 ---------------
 A :7...26           ( 1.00    -0.6517)  ( 1.00    -0.4888)  ( 1.00    -0.4135)  ( 1.00    -0.4051)
                     ( 1.00    -0.4015)  ( 1.00    -0.3668)  ( 1.00    -0.3414)  ( 1.00    -0.3309)
                     ( 1.00    -0.2835)  ( 1.00    -0.2015)  ( 0.00    -0.0841)  ( 0.00    -0.0133)
                     ( 0.00     0.0261)  ( 0.00     0.0390)  ( 0.00     0.0485)  ( 0.00     0.0750)
                     ( 0.00     0.0797)  ( 0.00     0.0859)  ( 0.00     0.1077)  ( 0.00     0.1575)
  
 Spin polar: 0 (Spin_A minus Spin_B electrons)

 CYCLE    2
   MIX coefficients:  0.8000  0.2000
 SCF Error: norm([F,P])=      0.029799958962, max([F,P])=      0.005081566668
 ***** SPIN 1 *****
 orbitals (Q,E):
 ---------------
 A :7...17           ( 1.00    -0.6532)  ( 1.00    -0.4901)  ( 1.00    -0.4149)  ( 1.00    -0.4066)
                     ( 1.00    -0.4023)  ( 1.00    -0.3679)  ( 1.00    -0.3429)  ( 1.00    -0.3313)
                     ( 1.00    -0.2837)  ( 1.00    -0.2011)  ( 0.00    -0.0852)
 ***** SPIN 2 *****
 orbitals (Q,E):
 ---------------
 A :7...17           ( 1.00    -0.6532)  ( 1.00    -0.4901)  ( 1.00    -0.4149)  ( 1.00    -0.4066)
                     ( 1.00    -0.4023)  ( 1.00    -0.3679)  ( 1.00    -0.3429)  ( 1.00    -0.3313)
                     ( 1.00    -0.2837)  ( 1.00    -0.2011)  ( 0.00    -0.0852)
  
 Spin polar: 0 (Spin_A minus Spin_B electrons)

 CYCLE    3
  SDIIS (wt  0.000): -0.0613  1.0613
 A-DIIS (wt  1.000):  0.0000  1.0000
  DIIS coefficients:  0.0000  1.0000
 SCF Error: norm([F,P])=      0.006229092871, max([F,P])=      0.000797029613
 ***** SPIN 1 *****
 orbitals (Q,E):
 ---------------
 A :7...17           ( 1.00    -0.6566)  ( 1.00    -0.4935)  ( 1.00    -0.4180)  ( 1.00    -0.4102)
                     ( 1.00    -0.4057)  ( 1.00    -0.3705)  ( 1.00    -0.3463)  ( 1.00    -0.3347)
                     ( 1.00    -0.2878)  ( 1.00    -0.2050)  ( 0.00    -0.0893)
 ***** SPIN 2 *****
 orbitals (Q,E):
 ---------------
 A :7...17           ( 1.00    -0.6566)  ( 1.00    -0.4935)  ( 1.00    -0.4180)  ( 1.00    -0.4102)
                     ( 1.00    -0.4057)  ( 1.00    -0.3705)  ( 1.00    -0.3463)  ( 1.00    -0.3347)
                     ( 1.00    -0.2878)  ( 1.00    -0.2050)  ( 0.00    -0.0893)
  
 Spin polar: 0 (Spin_A minus Spin_B electrons)

 CYCLE    4
  SDIIS (wt  1.000):  0.0207  0.5591  0.4202
  DIIS coefficients:  0.0207  0.5591  0.4202
 SCF Error: norm([F,P])=      0.008937336479, max([F,P])=      0.000866259423
 ***** SPIN 1 *****
 orbitals (Q,E):
 ---------------
 A :7...17           ( 1.00    -0.6558)  ( 1.00    -0.4926)  ( 1.00    -0.4172)  ( 1.00    -0.4092)
                     ( 1.00    -0.4048)  ( 1.00    -0.3701)  ( 1.00    -0.3455)  ( 1.00    -0.3337)
                     ( 1.00    -0.2865)  ( 1.00    -0.2037)  ( 0.00    -0.0879)
 ***** SPIN 2 *****
 orbitals (Q,E):
 ---------------
 A :7...17           ( 1.00    -0.6558)  ( 1.00    -0.4926)  ( 1.00    -0.4172)  ( 1.00    -0.4092)
                     ( 1.00    -0.4048)  ( 1.00    -0.3701)  ( 1.00    -0.3455)  ( 1.00    -0.3337)
                     ( 1.00    -0.2865)  ( 1.00    -0.2037)  ( 0.00    -0.0879)
  
 Spin polar: 0 (Spin_A minus Spin_B electrons)

 CYCLE    5
  SDIIS (wt  1.000):  0.0062  0.1559  0.1264  0.7115
  DIIS coefficients:  0.0062  0.1559  0.1264  0.7115
 SCF Error: norm([F,P])=      0.000696697784, max([F,P])=      0.000070906930
 ***** SPIN 1 *****
 orbitals (Q,E):
 ---------------
 A :7...17           ( 1.00    -0.6557)  ( 1.00    -0.4926)  ( 1.00    -0.4172)  ( 1.00    -0.4092)
                     ( 1.00    -0.4048)  ( 1.00    -0.3700)  ( 1.00    -0.3454)  ( 1.00    -0.3337)
                     ( 1.00    -0.2866)  ( 1.00    -0.2038)  ( 0.00    -0.0880)
 ***** SPIN 2 *****
 orbitals (Q,E):
 ---------------
 A :7...17           ( 1.00    -0.6557)  ( 1.00    -0.4926)  ( 1.00    -0.4172)  ( 1.00    -0.4092)
                     ( 1.00    -0.4048)  ( 1.00    -0.3700)  ( 1.00    -0.3454)  ( 1.00    -0.3337)
                     ( 1.00    -0.2866)  ( 1.00    -0.2038)  ( 0.00    -0.0880)
  
 Spin polar: 0 (Spin_A minus Spin_B electrons)

 CYCLE    6
  SDIIS (wt  1.000):  0.0033  0.0437  0.0340  0.3166  0.6024
  DIIS coefficients:  0.0033  0.0437  0.0340  0.3166  0.6024
 SCF Error: norm([F,P])=      0.000269641742, max([F,P])=      0.000025967651
 ***** SPIN 1 *****
 orbitals (Q,E):
 ---------------
 A :7...17           ( 1.00    -0.6557)  ( 1.00    -0.4926)  ( 1.00    -0.4172)  ( 1.00    -0.4092)
                     ( 1.00    -0.4048)  ( 1.00    -0.3700)  ( 1.00    -0.3454)  ( 1.00    -0.3337)
                     ( 1.00    -0.2865)  ( 1.00    -0.2037)  ( 0.00    -0.0879)
 ***** SPIN 2 *****
 orbitals (Q,E):
 ---------------
 A :7...17           ( 1.00    -0.6557)  ( 1.00    -0.4926)  ( 1.00    -0.4172)  ( 1.00    -0.4092)
                     ( 1.00    -0.4048)  ( 1.00    -0.3700)  ( 1.00    -0.3454)  ( 1.00    -0.3337)
                     ( 1.00    -0.2865)  ( 1.00    -0.2037)  ( 0.00    -0.0879)
  
 Spin polar: 0 (Spin_A minus Spin_B electrons)

 CYCLE    7
  SDIIS (wt  1.000):  0.0014  0.0155  0.0112  0.1342  0.3066  0.5312
  DIIS coefficients:  0.0014  0.0155  0.0112  0.1342  0.3066  0.5312
 SCF Error: norm([F,P])=      0.000061010508, max([F,P])=      0.000003777332
 ***** SPIN 1 *****
 orbitals (Q,E):
 ---------------
 A :7...17           ( 1.00    -0.6557)  ( 1.00    -0.4925)  ( 1.00    -0.4172)  ( 1.00    -0.4092)
                     ( 1.00    -0.4048)  ( 1.00    -0.3700)  ( 1.00    -0.3454)  ( 1.00    -0.3337)
                     ( 1.00    -0.2865)  ( 1.00    -0.2037)  ( 0.00    -0.0879)
 ***** SPIN 2 *****
 orbitals (Q,E):
 ---------------
 A :7...17           ( 1.00    -0.6557)  ( 1.00    -0.4925)  ( 1.00    -0.4172)  ( 1.00    -0.4092)
                     ( 1.00    -0.4048)  ( 1.00    -0.3700)  ( 1.00    -0.3454)  ( 1.00    -0.3337)
                     ( 1.00    -0.2865)  ( 1.00    -0.2037)  ( 0.00    -0.0879)
  
 Spin polar: 0 (Spin_A minus Spin_B electrons)

 CYCLE    8
  SDIIS (wt  1.000):  0.0002  0.0035  0.0020  0.0311  0.0780  0.2253  0.6599
  DIIS coefficients:  0.0002  0.0035  0.0020  0.0311  0.0780  0.2253  0.6599
 SCF Error: norm([F,P])=      0.000013737581, max([F,P])=      0.000000762008
 ***** SPIN 1 *****
 orbitals (Q,E):
 ---------------
 A :7...17           ( 1.00    -0.6557)  ( 1.00    -0.4925)  ( 1.00    -0.4172)  ( 1.00    -0.4092)
                     ( 1.00    -0.4048)  ( 1.00    -0.3700)  ( 1.00    -0.3454)  ( 1.00    -0.3337)
                     ( 1.00    -0.2865)  ( 1.00    -0.2037)  ( 0.00    -0.0879)
 ***** SPIN 2 *****
 orbitals (Q,E):
 ---------------
 A :7...17           ( 1.00    -0.6557)  ( 1.00    -0.4925)  ( 1.00    -0.4172)  ( 1.00    -0.4092)
                     ( 1.00    -0.4048)  ( 1.00    -0.3700)  ( 1.00    -0.3454)  ( 1.00    -0.3337)
                     ( 1.00    -0.2865)  ( 1.00    -0.2037)  ( 0.00    -0.0879)
  
 Spin polar: 0 (Spin_A minus Spin_B electrons)

 CYCLE    9
  SDIIS (wt  1.000):  0.0000  0.0002  0.0001  0.0019  0.0058  0.0319  0.1702  0.7898
  DIIS coefficients:  0.0000  0.0002  0.0001  0.0019  0.0058  0.0319  0.1702  0.7898
 SCF Error: norm([F,P])=      0.000001758606, max([F,P])=      0.000000191779
 ***** SPIN 1 *****
 orbitals (Q,E):
 ---------------
 A :7...17           ( 1.00    -0.6557)  ( 1.00    -0.4925)  ( 1.00    -0.4172)  ( 1.00    -0.4092)
                     ( 1.00    -0.4048)  ( 1.00    -0.3700)  ( 1.00    -0.3454)  ( 1.00    -0.3337)
                     ( 1.00    -0.2865)  ( 1.00    -0.2037)  ( 0.00    -0.0879)
 ***** SPIN 2 *****
 orbitals (Q,E):
 ---------------
 A :7...17           ( 1.00    -0.6557)  ( 1.00    -0.4925)  ( 1.00    -0.4172)  ( 1.00    -0.4092)
                     ( 1.00    -0.4048)  ( 1.00    -0.3700)  ( 1.00    -0.3454)  ( 1.00    -0.3337)
                     ( 1.00    -0.2865)  ( 1.00    -0.2037)  ( 0.00    -0.0879)
  
 Spin polar: 0 (Spin_A minus Spin_B electrons)

 CYCLE   10
  SDIIS (wt  1.000): -0.0000  0.0000  0.0000  0.0002  0.0008  0.0050  0.0310  0.1793  0.7837
  DIIS coefficients: -0.0000  0.0000  0.0000  0.0002  0.0008  0.0050  0.0310  0.1793  0.7837
 SCF Error: norm([F,P])=      0.000000150276, max([F,P])=      0.000000014407
 ***** SPIN 1 *****
 orbitals (Q,E):
 ---------------
 A :7...17           ( 1.00    -0.6557)  ( 1.00    -0.4925)  ( 1.00    -0.4172)  ( 1.00    -0.4092)
                     ( 1.00    -0.4048)  ( 1.00    -0.3700)  ( 1.00    -0.3454)  ( 1.00    -0.3337)
                     ( 1.00    -0.2865)  ( 1.00    -0.2037)  ( 0.00    -0.0879)
 ***** SPIN 2 *****
 orbitals (Q,E):
 ---------------
 A :7...17           ( 1.00    -0.6557)  ( 1.00    -0.4925)  ( 1.00    -0.4172)  ( 1.00    -0.4092)
                     ( 1.00    -0.4048)  ( 1.00    -0.3700)  ( 1.00    -0.3454)  ( 1.00    -0.3337)
                     ( 1.00    -0.2865)  ( 1.00    -0.2037)  ( 0.00    -0.0879)
  
 Spin polar: 0 (Spin_A minus Spin_B electrons)

 CYCLE   11
  SDIIS (wt  1.000):  0.0000 -0.0000 -0.0000 -0.0000 -0.0000  0.0001  0.0019  0.0151  0.1763  0.8067
  DIIS coefficients:  0.0000 -0.0000 -0.0000 -0.0000 -0.0000  0.0001  0.0019  0.0151  0.1763  0.8067
 SCF Error: norm([F,P])=      0.000000037307, max([F,P])=      0.000000005347
 ***** SPIN 1 *****
 orbitals (Q,E):
 ---------------
 A :7...17           ( 1.00    -0.6557)  ( 1.00    -0.4925)  ( 1.00    -0.4172)  ( 1.00    -0.4092)
                     ( 1.00    -0.4048)  ( 1.00    -0.3700)  ( 1.00    -0.3454)  ( 1.00    -0.3337)
                     ( 1.00    -0.2865)  ( 1.00    -0.2037)  ( 0.00    -0.0879)
 ***** SPIN 2 *****
 orbitals (Q,E):
 ---------------
 A :7...17           ( 1.00    -0.6557)  ( 1.00    -0.4925)  ( 1.00    -0.4172)  ( 1.00    -0.4092)
                     ( 1.00    -0.4048)  ( 1.00    -0.3700)  ( 1.00    -0.3454)  ( 1.00    -0.3337)
                     ( 1.00    -0.2865)  ( 1.00    -0.2037)  ( 0.00    -0.0879)
  
 Spin polar: 0 (Spin_A minus Spin_B electrons)

 SCF CONVERGED

 CYCLE   12
 *** Setting up for NEW gradients in Focky
 *** Using FIT density in Focky
 ***** SPIN 1 *****
 orbitals (Q,E):
 ---------------
 A :7...26           ( 1.00    -0.6557)  ( 1.00    -0.4925)  ( 1.00    -0.4172)  ( 1.00    -0.4092)
                     ( 1.00    -0.4048)  ( 1.00    -0.3700)  ( 1.00    -0.3454)  ( 1.00    -0.3337)
                     ( 1.00    -0.2865)  ( 1.00    -0.2037)  ( 0.00    -0.0879)  ( 0.00    -0.0156)
                     ( 0.00     0.0240)  ( 0.00     0.0367)  ( 0.00     0.0461)  ( 0.00     0.0728)
                     ( 0.00     0.0774)  ( 0.00     0.0834)  ( 0.00     0.1047)  ( 0.00     0.1548)
 ***** SPIN 2 *****
 orbitals (Q,E):
 ---------------
 A :7...26           ( 1.00    -0.6557)  ( 1.00    -0.4925)  ( 1.00    -0.4172)  ( 1.00    -0.4092)
                     ( 1.00    -0.4048)  ( 1.00    -0.3700)  ( 1.00    -0.3454)  ( 1.00    -0.3337)
                     ( 1.00    -0.2865)  ( 1.00    -0.2037)  ( 0.00    -0.0879)  ( 0.00    -0.0156)
                     ( 0.00     0.0240)  ( 0.00     0.0367)  ( 0.00     0.0461)  ( 0.00     0.0728)
                     ( 0.00     0.0774)  ( 0.00     0.0834)  ( 0.00     0.1047)  ( 0.00     0.1548)
  
 Spin polar: 0 (Spin_A minus Spin_B electrons)


 Fit test: (difference of exact and fit density, squared integrated, result summed over spins)
         SCF:                                          0.00001051413845

 Gross Charges per Atom (Z minus electrons)
 ==========================================
             0.3919    0.4974    0.4974   -0.5017   -0.1483   -0.1459   -0.1483   -0.1483   -0.1483   -0.1459
 Net Total: -0.00000000


 =================================================================
 M U L T I P O L E   D E R I V E D   C H A R G E   A N A L Y S I S
 =================================================================

 See: M. Swart, P.Th. van Duijnen, J.G. Snijders, J.Comput.Chem., (2001), p. 79-88.

 ----------------------------------------------------- 
 MDC atomic charges (includes spinA + spinB electrons)
 ----------------------------------------------------- 

        Atom    Level:     MDC-m        MDC-d        MDC-q
 ---------------------------------------------------------
     1     C            0.257412     0.262394     0.364693
     2     C            0.214774     0.176209     0.252747
     3     C            0.214774     0.176209     0.252750
     4     O           -0.419693    -0.487221    -0.540422
     5     H           -0.047183    -0.029959    -0.071239
     6     H           -0.039268    -0.003879    -0.022409
     7     H           -0.047182    -0.029958    -0.071237
     8     H           -0.047183    -0.029959    -0.071237
     9     H           -0.047182    -0.029958    -0.071237
    10     H           -0.039268    -0.003879    -0.022409

 -------------------------------- 
 MDC spin density (spinA - spinB)
 -------------------------------- 

        Atom    Level:     MDC-m        MDC-d        MDC-q
 ---------------------------------------------------------
     1     C           -0.000000    -0.000000    -0.000000
     2     C           -0.000000    -0.000000     0.000000
     3     C            0.000000     0.000000     0.000000
     4     O            0.000000     0.000000     0.000000
     5     H            0.000000     0.000000     0.000000
     6     H           -0.000000    -0.000000    -0.000000
     7     H            0.000000     0.000000     0.000000
     8     H            0.000000     0.000000     0.000000
     9     H            0.000000     0.000000     0.000000
    10     H           -0.000000    -0.000000    -0.000000


 ==========
 S**2 value  ***  see also R. Bulo et al., J.Am.Chem.Soc., 124 (2002) 13903-13910, note (29)  ***
 ==========
  
                                       exact      expectation value

 Total S2 (S squared)                  0.00000            -0.00000


 =======================================
 OCCUPIED-VIRTUAL DIPOLE MATRIX ELEMENTS  ***  (numeric integrals)  ***
 =======================================
  

**************************************************************************
*                                                                        *
*        EXCITATION ENERGY CALCULATION, a part of the ADF-RESPONSE code  *
*                                                                        *
*        RESPONSE, extension of the ADF program for linear and nonlinear *
*        response calculations, by:                                      *
*        S.J.A. van Gisbergen, J.G. Snijders and E.J. Baerends,          *
*                   with contributions by:                               *
*        J.A. Groeneveld, F. Kootstra, and V.P. Osinga                   *
*              version of February 1999, in ADF99                        *
*                                                                        *
*        The most extensive description of the used algorithms is        *
*        given in: S.J.A. van Gisbergen, J.G. Snijders, E.J. Baerends    *
*                  Comp. Phys. Commun. 118 (1999) p.119-138              *
*        and in: S.J.A. van Gisbergen, Ph.D. thesis Amsterdam (1998)     *
*                                                                        *
**************************************************************************


**************************************************************************
*                                                                        *
*             Data for EXCITATION program part                           *
*                                                                        *
* Relevant references are:                                               *
*   S.J.A. van Gisbergen, J.G. Snijders, E.J. Baerends,                  *
*     Comput. Phys. Commun. 118, p.119 (1999)                            *
*   S.J.A. van Gisbergen, F. Kootstra, P.R.T. Schipper, O.V. Gritsenko,  *
*   J. G. Snijders, E.J. Baerends, Phys. Rev. A57 p.2556 (1998)          *
*                                                                        *
*   Ch. Jamorski, M.E. Casida, and D.R. Salahub                          *
*        J. Chem. Phys. 104, p.5134 (1996)                               *
*   R. Bauernschmitt and R. Ahlrichs Chem. Phys. Lett. 256, p.454 (1996) *
*                                                                        *
*   Maximum number of cycles in Davidson part, ndvcyc =              200 *
*                                                                        *
*   The exchange correlation kernel f_xc which is used, is               *
*   Adiabatic LDA, which is frequency-independent.                       *
*                                                                        *
*   Tails of functions are neglected                                     *
*         tailbas =    0.1000000000E-15                                  *
*         tailfit =    0.1000000000E-15                                  *
*   Dipole-allowed irreps are = A                                        *
*                               A                                        *
*                               A                                        *
*                                                                        *
*   Nr of excitation energies per irrep to be calculated                 *
*   Excitations calculated with the davidson method                      *
*       4 of     4928 excitations in irrep A    column   1               *
*                                                                        *
**************************************************************************

 The Clebsch-Gordan series for each direct product
                               A
                         -------
 A * A                        X


**************************************************************************
*****  STARTING CALCULATION OF SPIN-UNRESTRICTED EXCITATION ENERGIES  ******
**************************************************************************


Eigenvalues of small (approximate) problem
   i, eigenvalue(i) in dvdson     1    0.1065304755E+00
   i, eigenvalue(i) in dvdson     2    0.1275548763E+00
   i, eigenvalue(i) in dvdson     3    0.1871493818E+00
   i, eigenvalue(i) in dvdson     4    0.1891764401E+00
Eigenvalues of small (approximate) problem
   i, eigenvalue(i) in dvdson     1    0.1056983890E+00
   i, eigenvalue(i) in dvdson     2    0.1260692698E+00
   i, eigenvalue(i) in dvdson     3    0.1870146426E+00
   i, eigenvalue(i) in dvdson     4    0.1888018213E+00
Eigenvalues of small (approximate) problem
   i, eigenvalue(i) in dvdson     1    0.1056979413E+00
   i, eigenvalue(i) in dvdson     2    0.1259991768E+00
   i, eigenvalue(i) in dvdson     3    0.1870140332E+00
   i, eigenvalue(i) in dvdson     4    0.1887891375E+00
Eigenvalues of small (approximate) problem
   i, eigenvalue(i) in dvdson     1    0.1056979381E+00
   i, eigenvalue(i) in dvdson     2    0.1259991350E+00
   i, eigenvalue(i) in dvdson     3    0.1870140229E+00
   i, eigenvalue(i) in dvdson     4    0.1887879014E+00


**************************************************************************
*                                                                        *
*   Final excitation energies from Davidson algorithm                    *
*                                                                        *
**************************************************************************

    Number of loops in Davidson routine     =    4                    
    Number of matrix-vector multiplications =   16                    
    Type of excitations = SPIN-UNRESTRICTED                                 
                                                                          

 Symmetry A    

 Excitation energies E in a.u. and eV, dE wrt prev. cycle,
 oscillator strengths f in a.u.

 no.  E/a.u.        E/eV      f           dE/a.u.
 -----------------------------------------------------
   1 0.10570      2.8762     0.13065E-24  0.67E-09
   2 0.12600      3.4286     0.11554E-11  0.11E-07
   3 0.18701      5.0889     0.30845E-18  0.39E-08
   4 0.18879      5.1372     0.23100E-01  0.47E-06
 
 Transition dipole moments mu (x,y,z) in a.u.
 (weak excitations are not printed)

 no.  E/eV          f                       mu (x,y,z)
 ------------------------------------------------------------------
   4  5.1372     0.23100E-01 -0.42842      0.75437E-06  0.46226E-03
 
                                                        
 Major MO -> MO transitions for the above excitations   
                                                        
    Excitation  Occupied to virtual  Contribution       

     Nr.          orbitals           weight        contributions to     
                                     (sum=1) transition dipole moment   
                                              x       y       z       


     1: Beta  16a     ->  17a        0.4998  0.0000 -0.0000  0.0000
     1: Alph  16a     ->  17a        0.4998 -0.0000  0.0000 -0.0000


     2: Alph  16a     ->  17a        0.4998  0.0000 -0.0000  0.0000
     2: Beta  16a     ->  17a        0.4998  0.0000 -0.0000  0.0000


     3: Alph  16a     ->  18a        0.4998  0.2439 -0.0000 -0.0000
     3: Beta  16a     ->  18a        0.4998 -0.2439  0.0000  0.0000


     4: Beta  16a     ->  18a        0.4998 -0.2427  0.0000  0.0000
     4: Alph  16a     ->  18a        0.4998 -0.2427  0.0000  0.0000
 

 All SPIN-UNRESTRICTED excitation energies 

 no.     E/a.u.        E/eV      f           Symmetry
 -----------------------------------------------------
   1:     0.10570      2.87619   0.1306E-24  A           
   2:     0.12600      3.42861   0.1155E-11  A           
   3:     0.18701      5.08891   0.3085E-18  A           
   4:     0.18879      5.13718   0.2310E-01  A           


 Normal termination of EXCITATION program part


 *** Using NEW gradient routines ***

 *** Calculating Gradients of Excitation Energy ***

 Relevent references:
    C. Van Caille and R. D. Amos, Chem. Phys. Lett. 308,249 (1999) and 317,159 (2000)
    F. Furche and R. Ahlrichs, J. Chem. Phys. 117,7433 (2002)
    M. Seth, G. Mazur,  T. Ziegler, Theor. Chem. Acc., 129, 331 (2011) 


   ---Begin solution of CPKS Equations--
   Real perturbation
Iter    5 Error   0.000681
  CPKS converged. Remaining residual is  0.0000144

 *** Finished Excitation Energy Gradients ***


 Geometry CYCLE 3
 ==============

 Energy gradients wrt nuclear displacements
 ==========================================

     Atom      Cartesian (a.u./angstrom)
                 X         Y         Z
 ----------------------------------------
     1 C    -0.000000  0.000000 -0.007814
     2 C    -0.007809  0.000000  0.011153
     3 C     0.007810  0.000000  0.011152
     4 O    -0.000000 -0.000000 -0.008357
     5 H    -0.001258  0.000483 -0.001208
     6 H    -0.000049 -0.000000 -0.000651
     7 H    -0.001258 -0.000483 -0.001208
     8 H     0.001258 -0.000483 -0.001208
     9 H     0.001258  0.000483 -0.001208
    10 H     0.000049  0.000000 -0.000651
 ----------------------------------------

 dE(predicted):    -0.74321E-03, dE(actual):    -0.10884E-02, Trust radius:    0.632456, all in a.u.
 
----------------------------------------------------------------------
Geometry Convergence after Step   3       (Hartree/Angstrom,Angstrom)
----------------------------------------------------------------------
current energy                               -1.91153009 Hartree
energy change                      -0.00108840     0.00100000    F
constrained gradient max            0.01115257     0.00100000    F
constrained gradient rms            0.00414565     0.00066667    F
gradient max                        0.01115257
gradient rms                        0.00414565
cart. step max                      0.03256333     0.01000000    F
cart. step rms                      0.01588855     0.00666667    F
 


 Coordinates (Cartesian)
 =======================

     Atom                    bohr                                 angstrom                 Geometric Variables
                   X           Y           Z              X           Y           Z       (0:frozen, *:LT par.)
 --------------------------------------------------------------------------------------------------------------
     1 C      -0.000000   -0.000003   -0.996312      -0.000000   -0.000002   -0.527225      1       2       3
     2 C      -2.479817    0.000015    0.304070      -1.312263    0.000008    0.160907      4       5       6
     3 C       2.479855    0.000012    0.303997       1.312283    0.000007    0.160868      7       8       9
     4 O      -0.000038   -0.000025   -3.536157      -0.000020   -0.000013   -1.871254     10      11      12
     5 H       2.696350    1.678918    1.538477       1.426847    0.888445    0.814127     13      14      15
     6 H       4.042582    0.000023   -1.055841       2.139242    0.000012   -0.558727     16      17      18
     7 H       2.696375   -1.678895    1.538472       1.426860   -0.888433    0.814124     19      20      21
     8 H      -2.696277   -1.678862    1.538594      -1.426808   -0.888416    0.814189     22      23      24
     9 H      -2.696296    1.678951    1.538513      -1.426818    0.888463    0.814146     25      26      27
    10 H      -4.042585   -0.000024   -1.055720      -2.139244   -0.000013   -0.558663     28      29      30
 --------------------------------------------------------------------------------------------------------------

 Number of elements of the density matrix on this node (used, total):      1329     18528


 ===========================================
 Numerical Integration : Fuzzy Cells (Becke)
 ===========================================
  
 Becke grid quality: GOOD           
  
 Lebedev angular grid order:             min:  11 max:  31
 Nr. of radial points:                   min:  54 max:  61

 Total nr. of points:     122538
 Nr. of blocks:              958
 Block length:               128
 Nr. of dummy points:         86


 Test of Precision of the Numerical Integration Grid
 ===================================================

 Integral of the Total Core Density:                   0.00000000000000


 ========================
 Density Fitting (zlmFit)
 ========================
  
 ZlmFit Fit Quality: GOOD           
  
 Max L-expansion:                        min:   8 max:   9
 Nr. of radial interpolation points:     min:  78 max: 108


 =====
 S C F  ***  ScaSCF  ***
 =====
  
 Initial density matrix is taken from previous geometry

 CYCLE    1
 SCF Error: norm([F,P])=      0.057362532920, max([F,P])=      0.005695480370
 ***** SPIN 1 *****
 orbitals (Q,E):
 ---------------
 A :7...26           ( 1.00    -0.6564)  ( 1.00    -0.4920)  ( 1.00    -0.4158)  ( 1.00    -0.4109)
                     ( 1.00    -0.4034)  ( 1.00    -0.3683)  ( 1.00    -0.3456)  ( 1.00    -0.3316)
                     ( 1.00    -0.2853)  ( 1.00    -0.2023)  ( 0.00    -0.0855)  ( 0.00    -0.0145)
                     ( 0.00     0.0242)  ( 0.00     0.0380)  ( 0.00     0.0474)  ( 0.00     0.0730)
                     ( 0.00     0.0765)  ( 0.00     0.0855)  ( 0.00     0.1055)  ( 0.00     0.1566)
 ***** SPIN 2 *****
 orbitals (Q,E):
 ---------------
 A :7...26           ( 1.00    -0.6564)  ( 1.00    -0.4920)  ( 1.00    -0.4158)  ( 1.00    -0.4109)
                     ( 1.00    -0.4034)  ( 1.00    -0.3683)  ( 1.00    -0.3456)  ( 1.00    -0.3316)
                     ( 1.00    -0.2853)  ( 1.00    -0.2023)  ( 0.00    -0.0855)  ( 0.00    -0.0145)
                     ( 0.00     0.0242)  ( 0.00     0.0380)  ( 0.00     0.0474)  ( 0.00     0.0730)
                     ( 0.00     0.0765)  ( 0.00     0.0855)  ( 0.00     0.1055)  ( 0.00     0.1566)
  
 Spin polar: 0 (Spin_A minus Spin_B electrons)

 CYCLE    2
   MIX coefficients:  0.8000  0.2000
 SCF Error: norm([F,P])=      0.021535566145, max([F,P])=      0.003702676580
 ***** SPIN 1 *****
 orbitals (Q,E):
 ---------------
 A :7...17           ( 1.00    -0.6571)  ( 1.00    -0.4924)  ( 1.00    -0.4163)  ( 1.00    -0.4115)
                     ( 1.00    -0.4035)  ( 1.00    -0.3688)  ( 1.00    -0.3462)  ( 1.00    -0.3313)
                     ( 1.00    -0.2849)  ( 1.00    -0.2014)  ( 0.00    -0.0858)
 ***** SPIN 2 *****
 orbitals (Q,E):
 ---------------
 A :7...17           ( 1.00    -0.6571)  ( 1.00    -0.4924)  ( 1.00    -0.4163)  ( 1.00    -0.4115)
                     ( 1.00    -0.4035)  ( 1.00    -0.3688)  ( 1.00    -0.3462)  ( 1.00    -0.3313)
                     ( 1.00    -0.2849)  ( 1.00    -0.2014)  ( 0.00    -0.0858)
  
 Spin polar: 0 (Spin_A minus Spin_B electrons)

 CYCLE    3
  SDIIS (wt  0.000): -0.0514  1.0514
 A-DIIS (wt  1.000):  0.0000  1.0000
  DIIS coefficients:  0.0000  1.0000
 SCF Error: norm([F,P])=      0.003713350765, max([F,P])=      0.000308916664
 ***** SPIN 1 *****
 orbitals (Q,E):
 ---------------
 A :7...17           ( 1.00    -0.6581)  ( 1.00    -0.4934)  ( 1.00    -0.4170)  ( 1.00    -0.4127)
                     ( 1.00    -0.4045)  ( 1.00    -0.3693)  ( 1.00    -0.3474)  ( 1.00    -0.3323)
                     ( 1.00    -0.2861)  ( 1.00    -0.2024)  ( 0.00    -0.0869)
 ***** SPIN 2 *****
 orbitals (Q,E):
 ---------------
 A :7...17           ( 1.00    -0.6581)  ( 1.00    -0.4934)  ( 1.00    -0.4170)  ( 1.00    -0.4127)
                     ( 1.00    -0.4045)  ( 1.00    -0.3693)  ( 1.00    -0.3474)  ( 1.00    -0.3323)
                     ( 1.00    -0.2861)  ( 1.00    -0.2024)  ( 0.00    -0.0869)
  
 Spin polar: 0 (Spin_A minus Spin_B electrons)

 CYCLE    4
  SDIIS (wt  1.000):  0.0419  0.4488  0.5093
  DIIS coefficients:  0.0419  0.4488  0.5093
 SCF Error: norm([F,P])=      0.004354481103, max([F,P])=      0.000447315274
 ***** SPIN 1 *****
 orbitals (Q,E):
 ---------------
 A :7...17           ( 1.00    -0.6578)  ( 1.00    -0.4931)  ( 1.00    -0.4168)  ( 1.00    -0.4123)
                     ( 1.00    -0.4042)  ( 1.00    -0.3692)  ( 1.00    -0.3470)  ( 1.00    -0.3319)
                     ( 1.00    -0.2856)  ( 1.00    -0.2020)  ( 0.00    -0.0864)
 ***** SPIN 2 *****
 orbitals (Q,E):
 ---------------
 A :7...17           ( 1.00    -0.6578)  ( 1.00    -0.4931)  ( 1.00    -0.4168)  ( 1.00    -0.4123)
                     ( 1.00    -0.4042)  ( 1.00    -0.3692)  ( 1.00    -0.3470)  ( 1.00    -0.3319)
                     ( 1.00    -0.2856)  ( 1.00    -0.2020)  ( 0.00    -0.0864)
  
 Spin polar: 0 (Spin_A minus Spin_B electrons)

 CYCLE    5
  SDIIS (wt  1.000):  0.0281  0.1456  0.2388  0.5875
  DIIS coefficients:  0.0281  0.1456  0.2388  0.5875
 SCF Error: norm([F,P])=      0.000819931237, max([F,P])=      0.000105649183
 ***** SPIN 1 *****
 orbitals (Q,E):
 ---------------
 A :7...17           ( 1.00    -0.6578)  ( 1.00    -0.4932)  ( 1.00    -0.4169)  ( 1.00    -0.4123)
                     ( 1.00    -0.4043)  ( 1.00    -0.3693)  ( 1.00    -0.3470)  ( 1.00    -0.3320)
                     ( 1.00    -0.2857)  ( 1.00    -0.2021)  ( 0.00    -0.0866)
 ***** SPIN 2 *****
 orbitals (Q,E):
 ---------------
 A :7...17           ( 1.00    -0.6578)  ( 1.00    -0.4932)  ( 1.00    -0.4169)  ( 1.00    -0.4123)
                     ( 1.00    -0.4043)  ( 1.00    -0.3693)  ( 1.00    -0.3470)  ( 1.00    -0.3320)
                     ( 1.00    -0.2857)  ( 1.00    -0.2021)  ( 0.00    -0.0866)
  
 Spin polar: 0 (Spin_A minus Spin_B electrons)

 CYCLE    6
  SDIIS (wt  1.000):  0.0131  0.0185  0.0582  0.2698  0.6404
  DIIS coefficients:  0.0131  0.0185  0.0582  0.2698  0.6404
 SCF Error: norm([F,P])=      0.000262256021, max([F,P])=      0.000035390799
 ***** SPIN 1 *****
 orbitals (Q,E):
 ---------------
 A :7...17           ( 1.00    -0.6578)  ( 1.00    -0.4931)  ( 1.00    -0.4168)  ( 1.00    -0.4123)
                     ( 1.00    -0.4042)  ( 1.00    -0.3692)  ( 1.00    -0.3470)  ( 1.00    -0.3320)
                     ( 1.00    -0.2857)  ( 1.00    -0.2021)  ( 0.00    -0.0865)
 ***** SPIN 2 *****
 orbitals (Q,E):
 ---------------
 A :7...17           ( 1.00    -0.6578)  ( 1.00    -0.4931)  ( 1.00    -0.4168)  ( 1.00    -0.4123)
                     ( 1.00    -0.4042)  ( 1.00    -0.3692)  ( 1.00    -0.3470)  ( 1.00    -0.3320)
                     ( 1.00    -0.2857)  ( 1.00    -0.2021)  ( 0.00    -0.0865)
  
 Spin polar: 0 (Spin_A minus Spin_B electrons)

 CYCLE    7
  SDIIS (wt  1.000):  0.0039  0.0056  0.0172  0.0874  0.2157  0.6703
  DIIS coefficients:  0.0039  0.0056  0.0172  0.0874  0.2157  0.6703
 SCF Error: norm([F,P])=      0.000018327916, max([F,P])=      0.000001767678
 ***** SPIN 1 *****
 orbitals (Q,E):
 ---------------
 A :7...17           ( 1.00    -0.6578)  ( 1.00    -0.4931)  ( 1.00    -0.4168)  ( 1.00    -0.4123)
                     ( 1.00    -0.4042)  ( 1.00    -0.3692)  ( 1.00    -0.3470)  ( 1.00    -0.3320)
                     ( 1.00    -0.2857)  ( 1.00    -0.2021)  ( 0.00    -0.0865)
 ***** SPIN 2 *****
 orbitals (Q,E):
 ---------------
 A :7...17           ( 1.00    -0.6578)  ( 1.00    -0.4931)  ( 1.00    -0.4168)  ( 1.00    -0.4123)
                     ( 1.00    -0.4042)  ( 1.00    -0.3692)  ( 1.00    -0.3470)  ( 1.00    -0.3320)
                     ( 1.00    -0.2857)  ( 1.00    -0.2021)  ( 0.00    -0.0865)
  
 Spin polar: 0 (Spin_A minus Spin_B electrons)

 CYCLE    8
  SDIIS (wt  1.000):  0.0003  0.0009  0.0018  0.0118  0.0314  0.3780  0.5759
  DIIS coefficients:  0.0003  0.0009  0.0018  0.0118  0.0314  0.3780  0.5759
 SCF Error: norm([F,P])=      0.000009764605, max([F,P])=      0.000000609220
 ***** SPIN 1 *****
 orbitals (Q,E):
 ---------------
 A :7...17           ( 1.00    -0.6578)  ( 1.00    -0.4931)  ( 1.00    -0.4168)  ( 1.00    -0.4123)
                     ( 1.00    -0.4042)  ( 1.00    -0.3692)  ( 1.00    -0.3470)  ( 1.00    -0.3320)
                     ( 1.00    -0.2857)  ( 1.00    -0.2021)  ( 0.00    -0.0865)
 ***** SPIN 2 *****
 orbitals (Q,E):
 ---------------
 A :7...17           ( 1.00    -0.6578)  ( 1.00    -0.4931)  ( 1.00    -0.4168)  ( 1.00    -0.4123)
                     ( 1.00    -0.4042)  ( 1.00    -0.3692)  ( 1.00    -0.3470)  ( 1.00    -0.3320)
                     ( 1.00    -0.2857)  ( 1.00    -0.2021)  ( 0.00    -0.0865)
  
 Spin polar: 0 (Spin_A minus Spin_B electrons)

 CYCLE    9
  SDIIS (wt  1.000):  0.0000  0.0001  0.0001  0.0010  0.0036  0.0963  0.1769  0.7221
  DIIS coefficients:  0.0000  0.0001  0.0001  0.0010  0.0036  0.0963  0.1769  0.7221
 SCF Error: norm([F,P])=      0.000001192008, max([F,P])=      0.000000147822
 ***** SPIN 1 *****
 orbitals (Q,E):
 ---------------
 A :7...17           ( 1.00    -0.6578)  ( 1.00    -0.4931)  ( 1.00    -0.4168)  ( 1.00    -0.4123)
                     ( 1.00    -0.4042)  ( 1.00    -0.3692)  ( 1.00    -0.3470)  ( 1.00    -0.3320)
                     ( 1.00    -0.2857)  ( 1.00    -0.2021)  ( 0.00    -0.0865)
 ***** SPIN 2 *****
 orbitals (Q,E):
 ---------------
 A :7...17           ( 1.00    -0.6578)  ( 1.00    -0.4931)  ( 1.00    -0.4168)  ( 1.00    -0.4123)
                     ( 1.00    -0.4042)  ( 1.00    -0.3692)  ( 1.00    -0.3470)  ( 1.00    -0.3320)
                     ( 1.00    -0.2857)  ( 1.00    -0.2021)  ( 0.00    -0.0865)
  
 Spin polar: 0 (Spin_A minus Spin_B electrons)

 CYCLE   10
  SDIIS (wt  1.000): -0.0000 -0.0000 -0.0000 -0.0001  0.0001  0.0139  0.0274  0.1721  0.7866
  DIIS coefficients: -0.0000 -0.0000 -0.0000 -0.0001  0.0001  0.0139  0.0274  0.1721  0.7866
 SCF Error: norm([F,P])=      0.000000094705, max([F,P])=      0.000000016462
 ***** SPIN 1 *****
 orbitals (Q,E):
 ---------------
 A :7...17           ( 1.00    -0.6578)  ( 1.00    -0.4931)  ( 1.00    -0.4168)  ( 1.00    -0.4123)
                     ( 1.00    -0.4042)  ( 1.00    -0.3692)  ( 1.00    -0.3470)  ( 1.00    -0.3320)
                     ( 1.00    -0.2857)  ( 1.00    -0.2021)  ( 0.00    -0.0865)
 ***** SPIN 2 *****
 orbitals (Q,E):
 ---------------
 A :7...17           ( 1.00    -0.6578)  ( 1.00    -0.4931)  ( 1.00    -0.4168)  ( 1.00    -0.4123)
                     ( 1.00    -0.4042)  ( 1.00    -0.3692)  ( 1.00    -0.3470)  ( 1.00    -0.3320)
                     ( 1.00    -0.2857)  ( 1.00    -0.2021)  ( 0.00    -0.0865)
  
 Spin polar: 0 (Spin_A minus Spin_B electrons)

 CYCLE   11
  SDIIS (wt  1.000): -0.0000 -0.0000 -0.0000 -0.0000 -0.0000  0.0010  0.0022  0.0211  0.1476  0.8281
  DIIS coefficients: -0.0000 -0.0000 -0.0000 -0.0000 -0.0000  0.0010  0.0022  0.0211  0.1476  0.8281
 SCF Error: norm([F,P])=      0.000000009892, max([F,P])=      0.000000000829
 ***** SPIN 1 *****
 orbitals (Q,E):
 ---------------
 A :7...17           ( 1.00    -0.6578)  ( 1.00    -0.4931)  ( 1.00    -0.4168)  ( 1.00    -0.4123)
                     ( 1.00    -0.4042)  ( 1.00    -0.3692)  ( 1.00    -0.3470)  ( 1.00    -0.3320)
                     ( 1.00    -0.2857)  ( 1.00    -0.2021)  ( 0.00    -0.0865)
 ***** SPIN 2 *****
 orbitals (Q,E):
 ---------------
 A :7...17           ( 1.00    -0.6578)  ( 1.00    -0.4931)  ( 1.00    -0.4168)  ( 1.00    -0.4123)
                     ( 1.00    -0.4042)  ( 1.00    -0.3692)  ( 1.00    -0.3470)  ( 1.00    -0.3320)
                     ( 1.00    -0.2857)  ( 1.00    -0.2021)  ( 0.00    -0.0865)
  
 Spin polar: 0 (Spin_A minus Spin_B electrons)

 SCF CONVERGED

 CYCLE   12
 *** Setting up for NEW gradients in Focky
 *** Using FIT density in Focky
 ***** SPIN 1 *****
 orbitals (Q,E):
 ---------------
 A :7...26           ( 1.00    -0.6578)  ( 1.00    -0.4931)  ( 1.00    -0.4168)  ( 1.00    -0.4123)
                     ( 1.00    -0.4042)  ( 1.00    -0.3692)  ( 1.00    -0.3470)  ( 1.00    -0.3320)
                     ( 1.00    -0.2857)  ( 1.00    -0.2021)  ( 0.00    -0.0865)  ( 0.00    -0.0150)
                     ( 0.00     0.0237)  ( 0.00     0.0375)  ( 0.00     0.0466)  ( 0.00     0.0723)
                     ( 0.00     0.0759)  ( 0.00     0.0848)  ( 0.00     0.1048)  ( 0.00     0.1557)
 ***** SPIN 2 *****
 orbitals (Q,E):
 ---------------
 A :7...26           ( 1.00    -0.6578)  ( 1.00    -0.4931)  ( 1.00    -0.4168)  ( 1.00    -0.4123)
                     ( 1.00    -0.4042)  ( 1.00    -0.3692)  ( 1.00    -0.3470)  ( 1.00    -0.3320)
                     ( 1.00    -0.2857)  ( 1.00    -0.2021)  ( 0.00    -0.0865)  ( 0.00    -0.0150)
                     ( 0.00     0.0237)  ( 0.00     0.0375)  ( 0.00     0.0466)  ( 0.00     0.0723)
                     ( 0.00     0.0759)  ( 0.00     0.0848)  ( 0.00     0.1048)  ( 0.00     0.1557)
  
 Spin polar: 0 (Spin_A minus Spin_B electrons)


 Fit test: (difference of exact and fit density, squared integrated, result summed over spins)
         SCF:                                          0.00001058434417

 Gross Charges per Atom (Z minus electrons)
 ==========================================
             0.4012    0.4970    0.4970   -0.5045   -0.1510   -0.1434   -0.1510   -0.1510   -0.1510   -0.1434
 Net Total:  0.00000000


 =================================================================
 M U L T I P O L E   D E R I V E D   C H A R G E   A N A L Y S I S
 =================================================================

 See: M. Swart, P.Th. van Duijnen, J.G. Snijders, J.Comput.Chem., (2001), p. 79-88.

 ----------------------------------------------------- 
 MDC atomic charges (includes spinA + spinB electrons)
 ----------------------------------------------------- 

        Atom    Level:     MDC-m        MDC-d        MDC-q
 ---------------------------------------------------------
     1     C            0.256379     0.262596     0.365993
     2     C            0.215518     0.177602     0.240554
     3     C            0.215518     0.177602     0.240557
     4     O           -0.421226    -0.491917    -0.544898
     5     H           -0.047416    -0.030799    -0.068669
     6     H           -0.038264    -0.001345    -0.013768
     7     H           -0.047415    -0.030798    -0.068667
     8     H           -0.047416    -0.030799    -0.068668
     9     H           -0.047415    -0.030798    -0.068666
    10     H           -0.038264    -0.001344    -0.013768

 -------------------------------- 
 MDC spin density (spinA - spinB)
 -------------------------------- 

        Atom    Level:     MDC-m        MDC-d        MDC-q
 ---------------------------------------------------------
     1     C           -0.000000    -0.000000    -0.000000
     2     C            0.000000    -0.000000     0.000000
     3     C           -0.000000    -0.000000     0.000000
     4     O           -0.000000    -0.000000    -0.000000
     5     H           -0.000000    -0.000000    -0.000000
     6     H           -0.000000    -0.000000    -0.000000
     7     H            0.000000     0.000000    -0.000000
     8     H            0.000000     0.000000     0.000000
     9     H            0.000000     0.000000     0.000000
    10     H            0.000000     0.000000     0.000000


 ==========
 S**2 value  ***  see also R. Bulo et al., J.Am.Chem.Soc., 124 (2002) 13903-13910, note (29)  ***
 ==========
  
                                       exact      expectation value

 Total S2 (S squared)                  0.00000             0.00000


 =======================================
 OCCUPIED-VIRTUAL DIPOLE MATRIX ELEMENTS  ***  (numeric integrals)  ***
 =======================================
  

**************************************************************************
*                                                                        *
*        EXCITATION ENERGY CALCULATION, a part of the ADF-RESPONSE code  *
*                                                                        *
*        RESPONSE, extension of the ADF program for linear and nonlinear *
*        response calculations, by:                                      *
*        S.J.A. van Gisbergen, J.G. Snijders and E.J. Baerends,          *
*                   with contributions by:                               *
*        J.A. Groeneveld, F. Kootstra, and V.P. Osinga                   *
*              version of February 1999, in ADF99                        *
*                                                                        *
*        The most extensive description of the used algorithms is        *
*        given in: S.J.A. van Gisbergen, J.G. Snijders, E.J. Baerends    *
*                  Comp. Phys. Commun. 118 (1999) p.119-138              *
*        and in: S.J.A. van Gisbergen, Ph.D. thesis Amsterdam (1998)     *
*                                                                        *
**************************************************************************


**************************************************************************
*                                                                        *
*             Data for EXCITATION program part                           *
*                                                                        *
* Relevant references are:                                               *
*   S.J.A. van Gisbergen, J.G. Snijders, E.J. Baerends,                  *
*     Comput. Phys. Commun. 118, p.119 (1999)                            *
*   S.J.A. van Gisbergen, F. Kootstra, P.R.T. Schipper, O.V. Gritsenko,  *
*   J. G. Snijders, E.J. Baerends, Phys. Rev. A57 p.2556 (1998)          *
*                                                                        *
*   Ch. Jamorski, M.E. Casida, and D.R. Salahub                          *
*        J. Chem. Phys. 104, p.5134 (1996)                               *
*   R. Bauernschmitt and R. Ahlrichs Chem. Phys. Lett. 256, p.454 (1996) *
*                                                                        *
*   Maximum number of cycles in Davidson part, ndvcyc =              200 *
*                                                                        *
*   The exchange correlation kernel f_xc which is used, is               *
*   Adiabatic LDA, which is frequency-independent.                       *
*                                                                        *
*   Tails of functions are neglected                                     *
*         tailbas =    0.1000000000E-15                                  *
*         tailfit =    0.1000000000E-15                                  *
*   Dipole-allowed irreps are = A                                        *
*                               A                                        *
*                               A                                        *
*                                                                        *
*   Nr of excitation energies per irrep to be calculated                 *
*   Excitations calculated with the davidson method                      *
*       4 of     4928 excitations in irrep A    column   1               *
*                                                                        *
**************************************************************************

 The Clebsch-Gordan series for each direct product
                               A
                         -------
 A * A                        X


**************************************************************************
*****  STARTING CALCULATION OF SPIN-UNRESTRICTED EXCITATION ENERGIES  ******
**************************************************************************


Eigenvalues of small (approximate) problem
   i, eigenvalue(i) in dvdson     1    0.1062687905E+00
   i, eigenvalue(i) in dvdson     2    0.1274172978E+00
   i, eigenvalue(i) in dvdson     3    0.1861112069E+00
   i, eigenvalue(i) in dvdson     4    0.1880615517E+00
Eigenvalues of small (approximate) problem
   i, eigenvalue(i) in dvdson     1    0.1054326414E+00
   i, eigenvalue(i) in dvdson     2    0.1259065275E+00
   i, eigenvalue(i) in dvdson     3    0.1859826195E+00
   i, eigenvalue(i) in dvdson     4    0.1876966766E+00
Eigenvalues of small (approximate) problem
   i, eigenvalue(i) in dvdson     1    0.1054321865E+00
   i, eigenvalue(i) in dvdson     2    0.1258344010E+00
   i, eigenvalue(i) in dvdson     3    0.1859820121E+00
   i, eigenvalue(i) in dvdson     4    0.1876825054E+00
Eigenvalues of small (approximate) problem
   i, eigenvalue(i) in dvdson     1    0.1054321832E+00
   i, eigenvalue(i) in dvdson     2    0.1258343581E+00
   i, eigenvalue(i) in dvdson     3    0.1859820020E+00
   i, eigenvalue(i) in dvdson     4    0.1876812614E+00


**************************************************************************
*                                                                        *
*   Final excitation energies from Davidson algorithm                    *
*                                                                        *
**************************************************************************

    Number of loops in Davidson routine     =    4                    
    Number of matrix-vector multiplications =   16                    
    Type of excitations = SPIN-UNRESTRICTED                                 
                                                                          

 Symmetry A    

 Excitation energies E in a.u. and eV, dE wrt prev. cycle,
 oscillator strengths f in a.u.

 no.  E/a.u.        E/eV      f           dE/a.u.
 -----------------------------------------------------
   1 0.10543      2.8690     0.60677E-26  0.70E-09
   2 0.12583      3.4241     0.10964E-10  0.11E-07
   3 0.18598      5.0608     0.73570E-19  0.38E-08
   4 0.18768      5.1071     0.23124E-01  0.47E-06
 
 Transition dipole moments mu (x,y,z) in a.u.
 (weak excitations are not printed)

 no.  E/eV          f                       mu (x,y,z)
 ------------------------------------------------------------------
   4  5.1071     0.23124E-01  0.42990     -0.87747E-06 -0.35204E-03
 
                                                        
 Major MO -> MO transitions for the above excitations   
                                                        
    Excitation  Occupied to virtual  Contribution       

     Nr.          orbitals           weight        contributions to     
                                     (sum=1) transition dipole moment   
                                              x       y       z       


     1: Beta  16a     ->  17a        0.4998 -0.0000  0.0000 -0.0000
     1: Alph  16a     ->  17a        0.4998  0.0000 -0.0000  0.0000


     2: Alph  16a     ->  17a        0.4998 -0.0000  0.0000 -0.0000
     2: Beta  16a     ->  17a        0.4998 -0.0000  0.0000 -0.0000


     3: Beta  16a     ->  18a        0.4998  0.2454 -0.0000 -0.0000
     3: Alph  16a     ->  18a        0.4998 -0.2454  0.0000  0.0000


     4: Alph  16a     ->  18a        0.4998  0.2442 -0.0000 -0.0000
     4: Beta  16a     ->  18a        0.4998  0.2442 -0.0000 -0.0000
 

 All SPIN-UNRESTRICTED excitation energies 

 no.     E/a.u.        E/eV      f           Symmetry
 -----------------------------------------------------
   1:     0.10543      2.86896   0.6068E-26  A           
   2:     0.12583      3.42413   0.1096E-10  A           
   3:     0.18598      5.06083   0.7357E-19  A           
   4:     0.18768      5.10707   0.2312E-01  A           


 Normal termination of EXCITATION program part


 *** Using NEW gradient routines ***

 *** Calculating Gradients of Excitation Energy ***

 Relevent references:
    C. Van Caille and R. D. Amos, Chem. Phys. Lett. 308,249 (1999) and 317,159 (2000)
    F. Furche and R. Ahlrichs, J. Chem. Phys. 117,7433 (2002)
    M. Seth, G. Mazur,  T. Ziegler, Theor. Chem. Acc., 129, 331 (2011) 


   ---Begin solution of CPKS Equations--
   Real perturbation
Iter    5 Error   0.000644
  CPKS converged. Remaining residual is  0.0000141

 *** Finished Excitation Energy Gradients ***


 Geometry CYCLE 4
 ==============

 Energy gradients wrt nuclear displacements
 ==========================================

     Atom      Cartesian (a.u./angstrom)
                 X         Y         Z
 ----------------------------------------
     1 C    -0.000000  0.000000 -0.003015
     2 C    -0.002120  0.000001 -0.000092
     3 C     0.002119 -0.000001 -0.000092
     4 O     0.000000 -0.000000  0.004351
     5 H    -0.000790 -0.000519 -0.000633
     6 H    -0.000472  0.000000  0.000689
     7 H    -0.000790  0.000520 -0.000632
     8 H     0.000790  0.000519 -0.000633
     9 H     0.000790 -0.000520 -0.000633
    10 H     0.000472 -0.000000  0.000689
 ----------------------------------------

 dE(predicted):    -0.29637E-03, dE(actual):    -0.32066E-03, Trust radius:    0.632456, all in a.u.
 
----------------------------------------------------------------------
Geometry Convergence after Step   4       (Hartree/Angstrom,Angstrom)
----------------------------------------------------------------------
current energy                               -1.91185075 Hartree
energy change                      -0.00032066     0.00100000    T
constrained gradient max            0.00435094     0.00100000    F
constrained gradient rms            0.00120546     0.00066667    F
gradient max                        0.00435094
gradient rms                        0.00120546
cart. step max                      0.00779000     0.01000000    T
cart. step rms                      0.00324324     0.00666667    T
 


 Coordinates (Cartesian)
 =======================

     Atom                    bohr                                 angstrom                 Geometric Variables
                   X           Y           Z              X           Y           Z       (0:frozen, *:LT par.)
 --------------------------------------------------------------------------------------------------------------
     1 C       0.000000   -0.000007   -0.991457       0.000000   -0.000004   -0.524657      1       2       3
     2 C      -2.481689    0.000015    0.303282      -1.313253    0.000008    0.160490      4       5       6
     3 C       2.481727    0.000013    0.303208       1.313274    0.000007    0.160451      7       8       9
     4 O      -0.000038   -0.000024   -3.537316      -0.000020   -0.000013   -1.871867     10      11      12
     5 H       2.711065    1.678837    1.538243       1.434634    0.888402    0.814003     13      14      15
     6 H       4.038467    0.000032   -1.065667       2.137065    0.000017   -0.563927     16      17      18
     7 H       2.711096   -1.678824    1.538220       1.434650   -0.888395    0.813991     19      20      21
     8 H      -2.710995   -1.678776    1.538365      -1.434597   -0.888370    0.814068     22      23      24
     9 H      -2.711014    1.678886    1.538257      -1.434607    0.888428    0.814010     25      26      27
    10 H      -4.038470   -0.000032   -1.065546      -2.137066   -0.000017   -0.563863     28      29      30
 --------------------------------------------------------------------------------------------------------------

 Number of elements of the density matrix on this node (used, total):      1329     18528


 ===========================================
 Numerical Integration : Fuzzy Cells (Becke)
 ===========================================
  
 Becke grid quality: GOOD           
  
 Lebedev angular grid order:             min:  11 max:  31
 Nr. of radial points:                   min:  54 max:  61

 Total nr. of points:     122542
 Nr. of blocks:              958
 Block length:               128
 Nr. of dummy points:         82


 Test of Precision of the Numerical Integration Grid
 ===================================================

 Integral of the Total Core Density:                   0.00000000000000


 ========================
 Density Fitting (zlmFit)
 ========================
  
 ZlmFit Fit Quality: GOOD           
  
 Max L-expansion:                        min:   8 max:   9
 Nr. of radial interpolation points:     min:  78 max: 108


 =====
 S C F  ***  ScaSCF  ***
 =====
  
 Initial density matrix is taken from previous geometry

 CYCLE    1
 SCF Error: norm([F,P])=      0.015229027368, max([F,P])=      0.002970828570
 ***** SPIN 1 *****
 orbitals (Q,E):
 ---------------
 A :7...26           ( 1.00    -0.6590)  ( 1.00    -0.4947)  ( 1.00    -0.4176)  ( 1.00    -0.4139)
                     ( 1.00    -0.4051)  ( 1.00    -0.3701)  ( 1.00    -0.3477)  ( 1.00    -0.3329)
                     ( 1.00    -0.2866)  ( 1.00    -0.2036)  ( 0.00    -0.0889)  ( 0.00    -0.0158)
                     ( 0.00     0.0227)  ( 0.00     0.0368)  ( 0.00     0.0459)  ( 0.00     0.0714)
                     ( 0.00     0.0746)  ( 0.00     0.0841)  ( 0.00     0.1029)  ( 0.00     0.1550)
 ***** SPIN 2 *****
 orbitals (Q,E):
 ---------------
 A :7...26           ( 1.00    -0.6590)  ( 1.00    -0.4947)  ( 1.00    -0.4176)  ( 1.00    -0.4139)
                     ( 1.00    -0.4051)  ( 1.00    -0.3701)  ( 1.00    -0.3477)  ( 1.00    -0.3329)
                     ( 1.00    -0.2866)  ( 1.00    -0.2036)  ( 0.00    -0.0889)  ( 0.00    -0.0158)
                     ( 0.00     0.0227)  ( 0.00     0.0368)  ( 0.00     0.0459)  ( 0.00     0.0714)
                     ( 0.00     0.0746)  ( 0.00     0.0841)  ( 0.00     0.1029)  ( 0.00     0.1550)
  
 Spin polar: 0 (Spin_A minus Spin_B electrons)

 CYCLE    2
  SDIIS (wt  0.000):  0.0962  0.9038
 A-DIIS (wt  1.000):  0.0000  1.0000
  DIIS coefficients:  0.0000  1.0000
 SCF Error: norm([F,P])=      0.004339296939, max([F,P])=      0.000530788853
 ***** SPIN 1 *****
 orbitals (Q,E):
 ---------------
 A :7...17           ( 1.00    -0.6574)  ( 1.00    -0.4930)  ( 1.00    -0.4158)  ( 1.00    -0.4120)
                     ( 1.00    -0.4035)  ( 1.00    -0.3688)  ( 1.00    -0.3462)  ( 1.00    -0.3310)
                     ( 1.00    -0.2843)  ( 1.00    -0.2013)  ( 0.00    -0.0864)
 ***** SPIN 2 *****
 orbitals (Q,E):
 ---------------
 A :7...17           ( 1.00    -0.6574)  ( 1.00    -0.4930)  ( 1.00    -0.4158)  ( 1.00    -0.4120)
                     ( 1.00    -0.4035)  ( 1.00    -0.3688)  ( 1.00    -0.3462)  ( 1.00    -0.3310)
                     ( 1.00    -0.2843)  ( 1.00    -0.2013)  ( 0.00    -0.0864)
  
 Spin polar: 0 (Spin_A minus Spin_B electrons)

 CYCLE    3
  SDIIS (wt  0.000):  0.0067  0.6087  0.3846
 A-DIIS (wt  1.000):  0.0000  0.6703  0.3297
  DIIS coefficients:  0.0000  0.6703  0.3297
 SCF Error: norm([F,P])=      0.006747713136, max([F,P])=      0.000657509869
 ***** SPIN 1 *****
 orbitals (Q,E):
 ---------------
 A :7...17           ( 1.00    -0.6578)  ( 1.00    -0.4935)  ( 1.00    -0.4163)  ( 1.00    -0.4126)
                     ( 1.00    -0.4039)  ( 1.00    -0.3690)  ( 1.00    -0.3466)  ( 1.00    -0.3315)
                     ( 1.00    -0.2849)  ( 1.00    -0.2019)  ( 0.00    -0.0872)
 ***** SPIN 2 *****
 orbitals (Q,E):
 ---------------
 A :7...17           ( 1.00    -0.6578)  ( 1.00    -0.4935)  ( 1.00    -0.4163)  ( 1.00    -0.4126)
                     ( 1.00    -0.4039)  ( 1.00    -0.3690)  ( 1.00    -0.3466)  ( 1.00    -0.3315)
                     ( 1.00    -0.2849)  ( 1.00    -0.2019)  ( 0.00    -0.0872)
  
 Spin polar: 0 (Spin_A minus Spin_B electrons)

 CYCLE    4
  SDIIS (wt  1.000):  0.4414  0.2483  0.3103
  DIIS coefficients:  0.4414  0.2483  0.3103
 SCF Error: norm([F,P])=      0.001879329147, max([F,P])=      0.000296271505
 ***** SPIN 1 *****
 orbitals (Q,E):
 ---------------
 A :7...17           ( 1.00    -0.6579)  ( 1.00    -0.4935)  ( 1.00    -0.4164)  ( 1.00    -0.4127)
                     ( 1.00    -0.4040)  ( 1.00    -0.3690)  ( 1.00    -0.3466)  ( 1.00    -0.3317)
                     ( 1.00    -0.2852)  ( 1.00    -0.2022)  ( 0.00    -0.0874)
 ***** SPIN 2 *****
 orbitals (Q,E):
 ---------------
 A :7...17           ( 1.00    -0.6579)  ( 1.00    -0.4935)  ( 1.00    -0.4164)  ( 1.00    -0.4127)
                     ( 1.00    -0.4040)  ( 1.00    -0.3690)  ( 1.00    -0.3466)  ( 1.00    -0.3317)
                     ( 1.00    -0.2852)  ( 1.00    -0.2022)  ( 0.00    -0.0874)
  
 Spin polar: 0 (Spin_A minus Spin_B electrons)

 CYCLE    5
  SDIIS (wt  1.000):  0.1331  0.0550  0.2318  0.5801
  DIIS coefficients:  0.1331  0.0550  0.2318  0.5801
 SCF Error: norm([F,P])=      0.000590873262, max([F,P])=      0.000081872733
 ***** SPIN 1 *****
 orbitals (Q,E):
 ---------------
 A :7...17           ( 1.00    -0.6579)  ( 1.00    -0.4935)  ( 1.00    -0.4164)  ( 1.00    -0.4127)
                     ( 1.00    -0.4040)  ( 1.00    -0.3691)  ( 1.00    -0.3466)  ( 1.00    -0.3317)
                     ( 1.00    -0.2851)  ( 1.00    -0.2021)  ( 0.00    -0.0874)
 ***** SPIN 2 *****
 orbitals (Q,E):
 ---------------
 A :7...17           ( 1.00    -0.6579)  ( 1.00    -0.4935)  ( 1.00    -0.4164)  ( 1.00    -0.4127)
                     ( 1.00    -0.4040)  ( 1.00    -0.3691)  ( 1.00    -0.3466)  ( 1.00    -0.3317)
                     ( 1.00    -0.2851)  ( 1.00    -0.2021)  ( 0.00    -0.0874)
  
 Spin polar: 0 (Spin_A minus Spin_B electrons)

 CYCLE    6
  SDIIS (wt  1.000):  0.0404  0.0151  0.0667  0.2241  0.6538
  DIIS coefficients:  0.0404  0.0151  0.0667  0.2241  0.6538
 SCF Error: norm([F,P])=      0.000067588461, max([F,P])=      0.000008444783
 ***** SPIN 1 *****
 orbitals (Q,E):
 ---------------
 A :7...17           ( 1.00    -0.6579)  ( 1.00    -0.4935)  ( 1.00    -0.4164)  ( 1.00    -0.4127)
                     ( 1.00    -0.4040)  ( 1.00    -0.3691)  ( 1.00    -0.3466)  ( 1.00    -0.3317)
                     ( 1.00    -0.2851)  ( 1.00    -0.2021)  ( 0.00    -0.0874)
 ***** SPIN 2 *****
 orbitals (Q,E):
 ---------------
 A :7...17           ( 1.00    -0.6579)  ( 1.00    -0.4935)  ( 1.00    -0.4164)  ( 1.00    -0.4127)
                     ( 1.00    -0.4040)  ( 1.00    -0.3691)  ( 1.00    -0.3466)  ( 1.00    -0.3317)
                     ( 1.00    -0.2851)  ( 1.00    -0.2021)  ( 0.00    -0.0874)
  
 Spin polar: 0 (Spin_A minus Spin_B electrons)

 CYCLE    7
  SDIIS (wt  1.000):  0.0115  0.0034  0.0191  0.0765  0.3382  0.5514
  DIIS coefficients:  0.0115  0.0034  0.0191  0.0765  0.3382  0.5514
 SCF Error: norm([F,P])=      0.000016951009, max([F,P])=      0.000000976594
 ***** SPIN 1 *****
 orbitals (Q,E):
 ---------------
 A :7...17           ( 1.00    -0.6579)  ( 1.00    -0.4935)  ( 1.00    -0.4164)  ( 1.00    -0.4127)
                     ( 1.00    -0.4040)  ( 1.00    -0.3691)  ( 1.00    -0.3466)  ( 1.00    -0.3317)
                     ( 1.00    -0.2851)  ( 1.00    -0.2021)  ( 0.00    -0.0874)
 ***** SPIN 2 *****
 orbitals (Q,E):
 ---------------
 A :7...17           ( 1.00    -0.6579)  ( 1.00    -0.4935)  ( 1.00    -0.4164)  ( 1.00    -0.4127)
                     ( 1.00    -0.4040)  ( 1.00    -0.3691)  ( 1.00    -0.3466)  ( 1.00    -0.3317)
                     ( 1.00    -0.2851)  ( 1.00    -0.2021)  ( 0.00    -0.0874)
  
 Spin polar: 0 (Spin_A minus Spin_B electrons)

 CYCLE    8
  SDIIS (wt  1.000):  0.0029  0.0007  0.0051  0.0197  0.1061  0.2381  0.6274
  DIIS coefficients:  0.0029  0.0007  0.0051  0.0197  0.1061  0.2381  0.6274
 SCF Error: norm([F,P])=      0.000003794620, max([F,P])=      0.000000410841
 ***** SPIN 1 *****
 orbitals (Q,E):
 ---------------
 A :7...17           ( 1.00    -0.6579)  ( 1.00    -0.4935)  ( 1.00    -0.4164)  ( 1.00    -0.4127)
                     ( 1.00    -0.4040)  ( 1.00    -0.3691)  ( 1.00    -0.3466)  ( 1.00    -0.3317)
                     ( 1.00    -0.2851)  ( 1.00    -0.2021)  ( 0.00    -0.0874)
 ***** SPIN 2 *****
 orbitals (Q,E):
 ---------------
 A :7...17           ( 1.00    -0.6579)  ( 1.00    -0.4935)  ( 1.00    -0.4164)  ( 1.00    -0.4127)
                     ( 1.00    -0.4040)  ( 1.00    -0.3691)  ( 1.00    -0.3466)  ( 1.00    -0.3317)
                     ( 1.00    -0.2851)  ( 1.00    -0.2021)  ( 0.00    -0.0874)
  
 Spin polar: 0 (Spin_A minus Spin_B electrons)

 CYCLE    9
  SDIIS (wt  1.000):  0.0002  0.0000  0.0004  0.0012  0.0109  0.0411  0.2211  0.7250
  DIIS coefficients:  0.0002  0.0000  0.0004  0.0012  0.0109  0.0411  0.2211  0.7250
 SCF Error: norm([F,P])=      0.000000716147, max([F,P])=      0.000000053131
 ***** SPIN 1 *****
 orbitals (Q,E):
 ---------------
 A :7...17           ( 1.00    -0.6579)  ( 1.00    -0.4935)  ( 1.00    -0.4164)  ( 1.00    -0.4127)
                     ( 1.00    -0.4040)  ( 1.00    -0.3691)  ( 1.00    -0.3466)  ( 1.00    -0.3317)
                     ( 1.00    -0.2851)  ( 1.00    -0.2021)  ( 0.00    -0.0874)
 ***** SPIN 2 *****
 orbitals (Q,E):
 ---------------
 A :7...17           ( 1.00    -0.6579)  ( 1.00    -0.4935)  ( 1.00    -0.4164)  ( 1.00    -0.4127)
                     ( 1.00    -0.4040)  ( 1.00    -0.3691)  ( 1.00    -0.3466)  ( 1.00    -0.3317)
                     ( 1.00    -0.2851)  ( 1.00    -0.2021)  ( 0.00    -0.0874)
  
 Spin polar: 0 (Spin_A minus Spin_B electrons)

 CYCLE   10
  SDIIS (wt  1.000):  0.0000  0.0000  0.0000  0.0001  0.0010  0.0063  0.0422  0.1487  0.8016
  DIIS coefficients:  0.0000  0.0000  0.0000  0.0001  0.0010  0.0063  0.0422  0.1487  0.8016
 SCF Error: norm([F,P])=      0.000000071406, max([F,P])=      0.000000011231
 ***** SPIN 1 *****
 orbitals (Q,E):
 ---------------
 A :7...17           ( 1.00    -0.6579)  ( 1.00    -0.4935)  ( 1.00    -0.4164)  ( 1.00    -0.4127)
                     ( 1.00    -0.4040)  ( 1.00    -0.3691)  ( 1.00    -0.3466)  ( 1.00    -0.3317)
                     ( 1.00    -0.2851)  ( 1.00    -0.2021)  ( 0.00    -0.0874)
 ***** SPIN 2 *****
 orbitals (Q,E):
 ---------------
 A :7...17           ( 1.00    -0.6579)  ( 1.00    -0.4935)  ( 1.00    -0.4164)  ( 1.00    -0.4127)
                     ( 1.00    -0.4040)  ( 1.00    -0.3691)  ( 1.00    -0.3466)  ( 1.00    -0.3317)
                     ( 1.00    -0.2851)  ( 1.00    -0.2021)  ( 0.00    -0.0874)
  
 Spin polar: 0 (Spin_A minus Spin_B electrons)

 CYCLE   11
  SDIIS (wt  1.000): -0.0000 -0.0000 -0.0000 -0.0000  0.0000  0.0004  0.0041  0.0150  0.1824  0.7981
  DIIS coefficients: -0.0000 -0.0000 -0.0000 -0.0000  0.0000  0.0004  0.0041  0.0150  0.1824  0.7981
 SCF Error: norm([F,P])=      0.000000013017, max([F,P])=      0.000000001830
 ***** SPIN 1 *****
 orbitals (Q,E):
 ---------------
 A :7...17           ( 1.00    -0.6579)  ( 1.00    -0.4935)  ( 1.00    -0.4164)  ( 1.00    -0.4127)
                     ( 1.00    -0.4040)  ( 1.00    -0.3691)  ( 1.00    -0.3466)  ( 1.00    -0.3317)
                     ( 1.00    -0.2851)  ( 1.00    -0.2021)  ( 0.00    -0.0874)
 ***** SPIN 2 *****
 orbitals (Q,E):
 ---------------
 A :7...17           ( 1.00    -0.6579)  ( 1.00    -0.4935)  ( 1.00    -0.4164)  ( 1.00    -0.4127)
                     ( 1.00    -0.4040)  ( 1.00    -0.3691)  ( 1.00    -0.3466)  ( 1.00    -0.3317)
                     ( 1.00    -0.2851)  ( 1.00    -0.2021)  ( 0.00    -0.0874)
  
 Spin polar: 0 (Spin_A minus Spin_B electrons)

 SCF CONVERGED

 CYCLE   12
 *** Setting up for NEW gradients in Focky
 *** Using FIT density in Focky
 ***** SPIN 1 *****
 orbitals (Q,E):
 ---------------
 A :7...26           ( 1.00    -0.6579)  ( 1.00    -0.4935)  ( 1.00    -0.4164)  ( 1.00    -0.4127)
                     ( 1.00    -0.4040)  ( 1.00    -0.3691)  ( 1.00    -0.3466)  ( 1.00    -0.3317)
                     ( 1.00    -0.2851)  ( 1.00    -0.2021)  ( 0.00    -0.0874)  ( 0.00    -0.0150)
                     ( 0.00     0.0234)  ( 0.00     0.0375)  ( 0.00     0.0466)  ( 0.00     0.0721)
                     ( 0.00     0.0753)  ( 0.00     0.0849)  ( 0.00     0.1039)  ( 0.00     0.1559)
 ***** SPIN 2 *****
 orbitals (Q,E):
 ---------------
 A :7...26           ( 1.00    -0.6579)  ( 1.00    -0.4935)  ( 1.00    -0.4164)  ( 1.00    -0.4127)
                     ( 1.00    -0.4040)  ( 1.00    -0.3691)  ( 1.00    -0.3466)  ( 1.00    -0.3317)
                     ( 1.00    -0.2851)  ( 1.00    -0.2021)  ( 0.00    -0.0874)  ( 0.00    -0.0150)
                     ( 0.00     0.0234)  ( 0.00     0.0375)  ( 0.00     0.0466)  ( 0.00     0.0721)
                     ( 0.00     0.0753)  ( 0.00     0.0849)  ( 0.00     0.1039)  ( 0.00     0.1559)
  
 Spin polar: 0 (Spin_A minus Spin_B electrons)


 Fit test: (difference of exact and fit density, squared integrated, result summed over spins)
         SCF:                                          0.00001056622171

 Gross Charges per Atom (Z minus electrons)
 ==========================================
             0.4013    0.4948    0.4948   -0.5045   -0.1506   -0.1421   -0.1506   -0.1506   -0.1506   -0.1421
 Net Total:  0.00000000


 =================================================================
 M U L T I P O L E   D E R I V E D   C H A R G E   A N A L Y S I S
 =================================================================

 See: M. Swart, P.Th. van Duijnen, J.G. Snijders, J.Comput.Chem., (2001), p. 79-88.

 ----------------------------------------------------- 
 MDC atomic charges (includes spinA + spinB electrons)
 ----------------------------------------------------- 

        Atom    Level:     MDC-m        MDC-d        MDC-q
 ---------------------------------------------------------
     1     C            0.256536     0.261179     0.363135
     2     C            0.215294     0.176925     0.236125
     3     C            0.215293     0.176924     0.236128
     4     O           -0.422006    -0.491811    -0.543621
     5     H           -0.047152    -0.030434    -0.067189
     6     H           -0.038254    -0.000742    -0.011510
     7     H           -0.047152    -0.030433    -0.067186
     8     H           -0.047153    -0.030435    -0.067188
     9     H           -0.047152    -0.030432    -0.067184
    10     H           -0.038254    -0.000742    -0.011510

 -------------------------------- 
 MDC spin density (spinA - spinB)
 -------------------------------- 

        Atom    Level:     MDC-m        MDC-d        MDC-q
 ---------------------------------------------------------
     1     C            0.000000     0.000000     0.000000
     2     C            0.000000     0.000000     0.000000
     3     C            0.000000     0.000000    -0.000000
     4     O            0.000000     0.000000     0.000000
     5     H            0.000000     0.000000     0.000000
     6     H            0.000000     0.000000     0.000000
     7     H            0.000000     0.000000     0.000000
     8     H           -0.000000    -0.000000    -0.000000
     9     H           -0.000000    -0.000000    -0.000000
    10     H            0.000000     0.000000     0.000000


 ==========
 S**2 value  ***  see also R. Bulo et al., J.Am.Chem.Soc., 124 (2002) 13903-13910, note (29)  ***
 ==========
  
                                       exact      expectation value

 Total S2 (S squared)                  0.00000             0.00000


 =======================================
 OCCUPIED-VIRTUAL DIPOLE MATRIX ELEMENTS  ***  (numeric integrals)  ***
 =======================================
  

**************************************************************************
*                                                                        *
*        EXCITATION ENERGY CALCULATION, a part of the ADF-RESPONSE code  *
*                                                                        *
*        RESPONSE, extension of the ADF program for linear and nonlinear *
*        response calculations, by:                                      *
*        S.J.A. van Gisbergen, J.G. Snijders and E.J. Baerends,          *
*                   with contributions by:                               *
*        J.A. Groeneveld, F. Kootstra, and V.P. Osinga                   *
*              version of February 1999, in ADF99                        *
*                                                                        *
*        The most extensive description of the used algorithms is        *
*        given in: S.J.A. van Gisbergen, J.G. Snijders, E.J. Baerends    *
*                  Comp. Phys. Commun. 118 (1999) p.119-138              *
*        and in: S.J.A. van Gisbergen, Ph.D. thesis Amsterdam (1998)     *
*                                                                        *
**************************************************************************


**************************************************************************
*                                                                        *
*             Data for EXCITATION program part                           *
*                                                                        *
* Relevant references are:                                               *
*   S.J.A. van Gisbergen, J.G. Snijders, E.J. Baerends,                  *
*     Comput. Phys. Commun. 118, p.119 (1999)                            *
*   S.J.A. van Gisbergen, F. Kootstra, P.R.T. Schipper, O.V. Gritsenko,  *
*   J. G. Snijders, E.J. Baerends, Phys. Rev. A57 p.2556 (1998)          *
*                                                                        *
*   Ch. Jamorski, M.E. Casida, and D.R. Salahub                          *
*        J. Chem. Phys. 104, p.5134 (1996)                               *
*   R. Bauernschmitt and R. Ahlrichs Chem. Phys. Lett. 256, p.454 (1996) *
*                                                                        *
*   Maximum number of cycles in Davidson part, ndvcyc =              200 *
*                                                                        *
*   The exchange correlation kernel f_xc which is used, is               *
*   Adiabatic LDA, which is frequency-independent.                       *
*                                                                        *
*   Tails of functions are neglected                                     *
*         tailbas =    0.1000000000E-15                                  *
*         tailfit =    0.1000000000E-15                                  *
*   Dipole-allowed irreps are = A                                        *
*                               A                                        *
*                               A                                        *
*                                                                        *
*   Nr of excitation energies per irrep to be calculated                 *
*   Excitations calculated with the davidson method                      *
*       4 of     4928 excitations in irrep A    column   1               *
*                                                                        *
**************************************************************************

 The Clebsch-Gordan series for each direct product
                               A
                         -------
 A * A                        X


**************************************************************************
*****  STARTING CALCULATION OF SPIN-UNRESTRICTED EXCITATION ENERGIES  ******
**************************************************************************


Eigenvalues of small (approximate) problem
   i, eigenvalue(i) in dvdson     1    0.1054221220E+00
   i, eigenvalue(i) in dvdson     2    0.1265821751E+00
   i, eigenvalue(i) in dvdson     3    0.1861289318E+00
   i, eigenvalue(i) in dvdson     4    0.1880772081E+00
Eigenvalues of small (approximate) problem
   i, eigenvalue(i) in dvdson     1    0.1045843863E+00
   i, eigenvalue(i) in dvdson     2    0.1250750887E+00
   i, eigenvalue(i) in dvdson     3    0.1860008492E+00
   i, eigenvalue(i) in dvdson     4    0.1877118442E+00
Eigenvalues of small (approximate) problem
   i, eigenvalue(i) in dvdson     1    0.1045839287E+00
   i, eigenvalue(i) in dvdson     2    0.1250033104E+00
   i, eigenvalue(i) in dvdson     3    0.1860002483E+00
   i, eigenvalue(i) in dvdson     4    0.1876965572E+00
Eigenvalues of small (approximate) problem
   i, eigenvalue(i) in dvdson     1    0.1045839254E+00
   i, eigenvalue(i) in dvdson     2    0.1250032677E+00
   i, eigenvalue(i) in dvdson     3    0.1860002383E+00
   i, eigenvalue(i) in dvdson     4    0.1876953121E+00


**************************************************************************
*                                                                        *
*   Final excitation energies from Davidson algorithm                    *
*                                                                        *
**************************************************************************

    Number of loops in Davidson routine     =    4                    
    Number of matrix-vector multiplications =   16                    
    Type of excitations = SPIN-UNRESTRICTED                                 
                                                                          

 Symmetry A    

 Excitation energies E in a.u. and eV, dE wrt prev. cycle,
 oscillator strengths f in a.u.

 no.  E/a.u.        E/eV      f           dE/a.u.
 -----------------------------------------------------
   1 0.10458      2.8459     0.32870E-24  0.70E-09
   2 0.12500      3.4015     0.31538E-11  0.11E-07
   3 0.18600      5.0613     0.34607E-15  0.37E-08
   4 0.18770      5.1074     0.23144E-01  0.47E-06
 
 Transition dipole moments mu (x,y,z) in a.u.
 (weak excitations are not printed)

 no.  E/eV          f                       mu (x,y,z)
 ------------------------------------------------------------------
   4  5.1074     0.23144E-01  0.43007     -0.18466E-05 -0.57056E-03
 
                                                        
 Major MO -> MO transitions for the above excitations   
                                                        
    Excitation  Occupied to virtual  Contribution       

     Nr.          orbitals           weight        contributions to     
                                     (sum=1) transition dipole moment   
                                              x       y       z       


     1: Beta  16a     ->  17a        0.4998 -0.0000  0.0000 -0.0000
     1: Alph  16a     ->  17a        0.4998  0.0000 -0.0000  0.0000


     2: Alph  16a     ->  17a        0.4998 -0.0000  0.0000 -0.0000
     2: Beta  16a     ->  17a        0.4998 -0.0000  0.0000 -0.0000


     3: Beta  16a     ->  18a        0.4998 -0.2460  0.0000  0.0000
     3: Alph  16a     ->  18a        0.4998  0.2460 -0.0000 -0.0000


     4: Alph  16a     ->  18a        0.4998  0.2449 -0.0000 -0.0000
     4: Beta  16a     ->  18a        0.4998  0.2449 -0.0000 -0.0000
 

 All SPIN-UNRESTRICTED excitation energies 

 no.     E/a.u.        E/eV      f           Symmetry
 -----------------------------------------------------
   1:     0.10458      2.84587   0.3287E-24  A           
   2:     0.12500      3.40151   0.3154E-11  A           
   3:     0.18600      5.06132   0.3461E-15  A           
   4:     0.18770      5.10745   0.2314E-01  A           


 Normal termination of EXCITATION program part


 *** Using NEW gradient routines ***

 *** Calculating Gradients of Excitation Energy ***

 Relevent references:
    C. Van Caille and R. D. Amos, Chem. Phys. Lett. 308,249 (1999) and 317,159 (2000)
    F. Furche and R. Ahlrichs, J. Chem. Phys. 117,7433 (2002)
    M. Seth, G. Mazur,  T. Ziegler, Theor. Chem. Acc., 129, 331 (2011) 


   ---Begin solution of CPKS Equations--
   Real perturbation
Iter    5 Error   0.000641
  CPKS converged. Remaining residual is  0.0000142

 *** Finished Excitation Energy Gradients ***


 Geometry CYCLE 5
 ==============

 Energy gradients wrt nuclear displacements
 ==========================================

     Atom      Cartesian (a.u./angstrom)
                 X         Y         Z
 ----------------------------------------
     1 C    -0.000000  0.000001 -0.000592
     2 C    -0.000317 -0.000000 -0.000216
     3 C     0.000317  0.000000 -0.000216
     4 O    -0.000000 -0.000000  0.000407
     5 H    -0.000043  0.000005  0.000106
     6 H    -0.000097 -0.000000  0.000096
     7 H    -0.000044 -0.000005  0.000106
     8 H     0.000043 -0.000005  0.000106
     9 H     0.000044  0.000004  0.000106
    10 H     0.000097  0.000000  0.000096
 ----------------------------------------

 dE(predicted):    -0.81789E-05, dE(actual):    -0.85139E-05, Trust radius:    0.632456, all in a.u.
 
---------------------------------------------------------
Geometry Convergence after Step   5       ** CONVERGED **
---------------------------------------------------------
current energy                               -1.91185926 Hartree
energy change                      -0.00000851     0.00100000    T
constrained gradient max            0.00059179     0.00100000    T
constrained gradient rms            0.00017323     0.00066667    T
gradient max                        0.00059179
gradient rms                        0.00017323
cart. step max                      0.00103087     0.01000000    T
cart. step rms                      0.00051141     0.00666667    T
 

 Number of elements of the density matrix on this node (used, total):      1329     18528


 ===========================================
 Numerical Integration : Fuzzy Cells (Becke)
 ===========================================
  
 Becke grid quality: GOOD           
  
 Lebedev angular grid order:             min:  11 max:  31
 Nr. of radial points:                   min:  54 max:  61

 Total nr. of points:     122542
 Nr. of blocks:              958
 Block length:               128
 Nr. of dummy points:         82


 Test of Precision of the Numerical Integration Grid
 ===================================================

 Integral of the Total Core Density:                   0.00000000000000


 ========================
 Density Fitting (zlmFit)
 ========================
  
 ZlmFit Fit Quality: GOOD           
  
 Max L-expansion:                        min:   8 max:   9
 Nr. of radial interpolation points:     min:  78 max: 108


 =====
 S C F  ***  ScaSCF  ***
 =====
  
 Initial density matrix is taken from previous geometry

 CYCLE    1
 SCF Error: norm([F,P])=      0.000000000114, max([F,P])=      0.000000000010
 ***** SPIN 1 *****
 orbitals (Q,E):
 ---------------
 A :7...26           ( 1.00    -0.6579)  ( 1.00    -0.4935)  ( 1.00    -0.4164)  ( 1.00    -0.4127)
                     ( 1.00    -0.4040)  ( 1.00    -0.3691)  ( 1.00    -0.3466)  ( 1.00    -0.3317)
                     ( 1.00    -0.2851)  ( 1.00    -0.2021)  ( 0.00    -0.0874)  ( 0.00    -0.0150)
                     ( 0.00     0.0234)  ( 0.00     0.0375)  ( 0.00     0.0466)  ( 0.00     0.0721)
                     ( 0.00     0.0753)  ( 0.00     0.0849)  ( 0.00     0.1039)  ( 0.00     0.1559)
 ***** SPIN 2 *****
 orbitals (Q,E):
 ---------------
 A :7...26           ( 1.00    -0.6579)  ( 1.00    -0.4935)  ( 1.00    -0.4164)  ( 1.00    -0.4127)
                     ( 1.00    -0.4040)  ( 1.00    -0.3691)  ( 1.00    -0.3466)  ( 1.00    -0.3317)
                     ( 1.00    -0.2851)  ( 1.00    -0.2021)  ( 0.00    -0.0874)  ( 0.00    -0.0150)
                     ( 0.00     0.0234)  ( 0.00     0.0375)  ( 0.00     0.0466)  ( 0.00     0.0721)
                     ( 0.00     0.0753)  ( 0.00     0.0849)  ( 0.00     0.1039)  ( 0.00     0.1559)
  
 Spin polar: 0 (Spin_A minus Spin_B electrons)

 CYCLE    2
  SDIIS (wt  0.000):  0.5362  0.4638
 A-DIIS (wt  1.000):  0.0000  1.0000
  DIIS coefficients:  0.0000  1.0000
 SCF Error: norm([F,P])=      0.000000000130, max([F,P])=      0.000000000022
 ***** SPIN 1 *****
 orbitals (Q,E):
 ---------------
 A :7...17           ( 1.00    -0.6579)  ( 1.00    -0.4935)  ( 1.00    -0.4164)  ( 1.00    -0.4127)
                     ( 1.00    -0.4040)  ( 1.00    -0.3691)  ( 1.00    -0.3466)  ( 1.00    -0.3317)
                     ( 1.00    -0.2851)  ( 1.00    -0.2021)  ( 0.00    -0.0874)
 ***** SPIN 2 *****
 orbitals (Q,E):
 ---------------
 A :7...17           ( 1.00    -0.6579)  ( 1.00    -0.4935)  ( 1.00    -0.4164)  ( 1.00    -0.4127)
                     ( 1.00    -0.4040)  ( 1.00    -0.3691)  ( 1.00    -0.3466)  ( 1.00    -0.3317)
                     ( 1.00    -0.2851)  ( 1.00    -0.2021)  ( 0.00    -0.0874)
  
 Spin polar: 0 (Spin_A minus Spin_B electrons)

 SCF CONVERGED

 CYCLE    3
1
 ***************************************************************************************************


                                                *******************
                                                *  R E S U L T S  *
                                                *******************
  
 Max allowed memory usage for fit           16777216000
 Memory usage for atom           1               7020224
 Memory usage for atom           2               7020224
 Memory usage for atom           3               7020224
 Memory usage for atom           4               7020224
 Memory usage for atom           5               2321328
 Memory usage for atom           6               2321328
 Memory usage for atom           7               2321328
 Memory usage for atom           8               2321328
 Memory usage for atom           9               2321328
 Memory usage for atom          10               2321328
 Start,  end atoms for each pass
     1    10
 Hartree-Fock: Doing       10 atoms in this pass
 ============= Using       34 Mbytes of shared memory for fitfit integrals and coeffs
 exenergy =   25.7255116716564        6.43137791791409     
 Max allowed memory usage for fit           16777216000
 Memory usage for atom           1               7020224
 Memory usage for atom           2               7020224
 Memory usage for atom           3               7020224
 Memory usage for atom           4               7020224
 Memory usage for atom           5               2321328
 Memory usage for atom           6               2321328
 Memory usage for atom           7               2321328
 Memory usage for atom           8               2321328
 Memory usage for atom           9               2321328
 Memory usage for atom          10               2321328
 Start,  end atoms for each pass
     1    10
 Hartree-Fock: Doing       10 atoms in this pass
 ============= Using       34 Mbytes of shared memory for fitfit integrals and coeffs
 exenergy =   25.7255116742098        6.43137791855245     
  
 Hartree-Fock exchange energy:   -25.7255116729331     
 *** Setting up for NEW gradients in Focky
 *** Using FIT density in Focky


                                   ***** SPIN 1 *****

 Scaled ZORA Orbital Energies, per Irrep and Spin:
 =================================================
                        Occup              E (au)              E (eV)       Diff (eV) with prev. cycle
                        -----      --------------------        ------       --------------------------
 A
               7        1.000     -0.65787790110853E+00       -17.902              -1.04E-09
               8        1.000     -0.49354822341906E+00       -13.430              -9.01E-10
               9        1.000     -0.41638653941961E+00       -11.330              -9.72E-10
              10        1.000     -0.41270180688759E+00       -11.230              -1.11E-09
              11        1.000     -0.40396701479792E+00       -10.993              -1.67E-10
              12        1.000     -0.36905852208570E+00       -10.043              -7.28E-10
              13        1.000     -0.34663081823617E+00        -9.432              -9.02E-10
              14        1.000     -0.33171014293129E+00        -9.026               3.43E-10
              15        1.000     -0.28513767535561E+00        -7.759               6.88E-10
              16        1.000     -0.20212303135241E+00        -5.500               1.47E-09
              17        0.000     -0.87393769486738E-01        -2.378
              18        0.000     -0.14997989894688E-01        -0.408
              19        0.000      0.23397518477631E-01         0.637
              20        0.000      0.37521665243920E-01         1.021
              21        0.000      0.46636567628317E-01         1.269
              22        0.000      0.72084867074359E-01         1.962
              23        0.000      0.75276534146911E-01         2.048
              24        0.000      0.84902266462295E-01         2.310
              25        0.000      0.10388417351859E+00         2.827
              26        0.000      0.15591077811687E+00         4.243
  
 HOMO :       16 A                -0.20212303135241E+00
 LUMO :       17 A                -0.87393769486738E-01
  


                                   ***** SPIN 2 *****

 Scaled ZORA Orbital Energies, per Irrep and Spin:
 =================================================
                        Occup              E (au)              E (eV)       Diff (eV) with prev. cycle
                        -----      --------------------        ------       --------------------------
 A
               7        1.000     -0.65787790110854E+00       -17.902              -1.04E-09
               8        1.000     -0.49354822341905E+00       -13.430              -8.99E-10
               9        1.000     -0.41638653941961E+00       -11.330              -9.72E-10
              10        1.000     -0.41270180688761E+00       -11.230              -1.11E-09
              11        1.000     -0.40396701479795E+00       -10.993              -1.68E-10
              12        1.000     -0.36905852208570E+00       -10.043              -7.28E-10
              13        1.000     -0.34663081823619E+00        -9.432              -9.03E-10
              14        1.000     -0.33171014293131E+00        -9.026               3.40E-10
              15        1.000     -0.28513767535560E+00        -7.759               6.88E-10
              16        1.000     -0.20212303135244E+00        -5.500               1.46E-09
              17        0.000     -0.87393769486733E-01        -2.378
              18        0.000     -0.14997989894624E-01        -0.408
              19        0.000      0.23397518477687E-01         0.637
              20        0.000      0.37521665243967E-01         1.021
              21        0.000      0.46636567628343E-01         1.269
              22        0.000      0.72084867074418E-01         1.962
              23        0.000      0.75276534146923E-01         2.048
              24        0.000      0.84902266462327E-01         2.310
              25        0.000      0.10388417351857E+00         2.827
              26        0.000      0.15591077811687E+00         4.243
  
 HOMO :       16 A                -0.20212303135244E+00
 LUMO :       17 A                -0.87393769486733E-01
  


 Orbital Energies, both Spins
 ========================================

 Irrep        no.  (spin)   Occup              E (au)                E (eV)
 ---------------------------------------------------------------------------
 A             1     A       1.00       -0.18751097727625E+02      -510.2433
 A             1      B      1.00       -0.18751097727625E+02      -510.2433
 A             2     A       1.00       -0.99916822501509E+01      -271.8875
 A             2      B      1.00       -0.99916822501510E+01      -271.8875
 A             3     A       1.00       -0.99073620736314E+01      -269.5930
 A             3      B      1.00       -0.99073620736314E+01      -269.5930
 A             4     A       1.00       -0.99073604167309E+01      -269.5930
 A             4      B      1.00       -0.99073604167309E+01      -269.5930
 A             5     A       1.00       -0.89480250681245E+00       -24.3488
 A             5      B      1.00       -0.89480250681246E+00       -24.3488
 A             6     A       1.00       -0.70975342280943E+00       -19.3134
 A             6      B      1.00       -0.70975342280942E+00       -19.3134
 A             7     A       1.00       -0.65787790110853E+00       -17.9018
 A             7      B      1.00       -0.65787790110854E+00       -17.9018
 A             8     A       1.00       -0.49354822341906E+00       -13.4301
 A             8      B      1.00       -0.49354822341905E+00       -13.4301
 A             9     A       1.00       -0.41638653941961E+00       -11.3305
 A             9      B      1.00       -0.41638653941961E+00       -11.3305
 A            10     A       1.00       -0.41270180688759E+00       -11.2302
 A            10      B      1.00       -0.41270180688761E+00       -11.2302
 A            11     A       1.00       -0.40396701479792E+00       -10.9925
 A            11      B      1.00       -0.40396701479795E+00       -10.9925
 A            12     A       1.00       -0.36905852208570E+00       -10.0426
 A            12      B      1.00       -0.36905852208570E+00       -10.0426
 A            13     A       1.00       -0.34663081823617E+00        -9.4323
 A            13      B      1.00       -0.34663081823619E+00        -9.4323
 A            14     A       1.00       -0.33171014293129E+00        -9.0263
 A            14      B      1.00       -0.33171014293131E+00        -9.0263
 A            15     A       1.00       -0.28513767535561E+00        -7.7590
 A            15      B      1.00       -0.28513767535560E+00        -7.7590
 A            16     A       1.00       -0.20212303135241E+00        -5.5000
 A            16      B      1.00       -0.20212303135244E+00        -5.5000
 A            17     A       0.00       -0.87393769486738E-01        -2.3781
 A            17      B      0.00       -0.87393769486733E-01        -2.3781
 A            18     A       0.00       -0.14997989894688E-01        -0.4081
 A            18      B      0.00       -0.14997989894624E-01        -0.4081
 A            19     A       0.00        0.23397518477631E-01         0.6367
 A            19      B      0.00        0.23397518477687E-01         0.6367
 A            20     A       0.00        0.37521665243920E-01         1.0210
 A            20      B      0.00        0.37521665243967E-01         1.0210
 A            21     A       0.00        0.46636567628317E-01         1.2690
 A            21      B      0.00        0.46636567628343E-01         1.2690
 A            22     A       0.00        0.72084867074359E-01         1.9615
 A            22      B      0.00        0.72084867074418E-01         1.9615
 A            23     A       0.00        0.75276534146911E-01         2.0484
 A            23      B      0.00        0.75276534146923E-01         2.0484
 A            24     A       0.00        0.84902266462295E-01         2.3103
 A            24      B      0.00        0.84902266462327E-01         2.3103
 A            25     A       0.00        0.10388417351859E+00         2.8268
 A            25      B      0.00        0.10388417351857E+00         2.8268
 A            26     A       0.00        0.15591077811687E+00         4.2425
 A            26      B      0.00        0.15591077811687E+00         4.2425
 A            27     A       0.00        0.15777582533188E+00         4.2933
 A            27      B      0.00        0.15777582533182E+00         4.2933
 A            28     A       0.00        0.16710187942540E+00         4.5471
 A            28      B      0.00        0.16710187942541E+00         4.5471
 A            29     A       0.00        0.17479613982928E+00         4.7564
 A            29      B      0.00        0.17479613982923E+00         4.7564
 A            30     A       0.00        0.23978046836673E+00         6.5248
 A            30      B      0.00        0.23978046836678E+00         6.5248
 A            31     A       0.00        0.24158208256251E+00         6.5738
 A            31      B      0.00        0.24158208256254E+00         6.5738
 A            32     A       0.00        0.28001023469430E+00         7.6195
 A            32      B      0.00        0.28001023469429E+00         7.6195
 A            33     A       0.00        0.28574375497454E+00         7.7755
 A            33      B      0.00        0.28574375497453E+00         7.7755
 A            34     A       0.00        0.31208183458078E+00         8.4922
 A            34      B      0.00        0.31208183458081E+00         8.4922
 A            35     A       0.00        0.35360177195712E+00         9.6220
 A            35      B      0.00        0.35360177195713E+00         9.6220
 A            36     A       0.00        0.35981956079088E+00         9.7912
 A            36      B      0.00        0.35981956079101E+00         9.7912
 A            37     A       0.00        0.37527342021200E+00        10.2117
 A            37      B      0.00        0.37527342021199E+00        10.2117
 A            38     A       0.00        0.39324050215239E+00        10.7006
 A            38      B      0.00        0.39324050215242E+00        10.7006
 A            39     A       0.00        0.39997728549143E+00        10.8839
 A            39      B      0.00        0.39997728549139E+00        10.8839
 A            40     A       0.00        0.41791221571093E+00        11.3720
 A            40      B      0.00        0.41791221571088E+00        11.3720
 A            41     A       0.00        0.45812750111265E+00        12.4663
 A            41      B      0.00        0.45812750111269E+00        12.4663
 A            42     A       0.00        0.46785585500330E+00        12.7310
 A            42      B      0.00        0.46785585500331E+00        12.7310
 A            43     A       0.00        0.49804448571076E+00        13.5525
 A            43      B      0.00        0.49804448571075E+00        13.5525
 A            44     A       0.00        0.54734328975725E+00        14.8940
 A            44      B      0.00        0.54734328975725E+00        14.8940
 A            45     A       0.00        0.65216107369116E+00        17.7462
 A            45      B      0.00        0.65216107369109E+00        17.7462
 A            46     A       0.00        0.67425041748396E+00        18.3473
 A            46      B      0.00        0.67425041748396E+00        18.3473
 A            47     A       0.00        0.67915838943304E+00        18.4808
 A            47      B      0.00        0.67915838943300E+00        18.4808
 A            48     A       0.00        0.77127649429697E+00        20.9875
 A            48      B      0.00        0.77127649429694E+00        20.9875
 A            49     A       0.00        0.78503275838722E+00        21.3618
 A            49      B      0.00        0.78503275838713E+00        21.3618
 A            50     A       0.00        0.82380280912999E+00        22.4168
 A            50      B      0.00        0.82380280913002E+00        22.4168
 A            51     A       0.00        0.83098310678310E+00        22.6122
 A            51      B      0.00        0.83098310678313E+00        22.6122
 A            52     A       0.00        0.92494680149306E+00        25.1691
 A            52      B      0.00        0.92494680149310E+00        25.1691
 A            53     A       0.00        0.95226292527408E+00        25.9124
 A            53      B      0.00        0.95226292527409E+00        25.9124
 A            54     A       0.00        0.99609977391245E+00        27.1053
 A            54      B      0.00        0.99609977391244E+00        27.1053
 A            55     A       0.00        0.10071967387172E+01        27.4072
 A            55      B      0.00        0.10071967387172E+01        27.4072
 A            56     A       0.00        0.10218681182948E+01        27.8064
 A            56      B      0.00        0.10218681182949E+01        27.8064
 A            57     A       0.00        0.10435033212497E+01        28.3952
 A            57      B      0.00        0.10435033212497E+01        28.3952
 A            58     A       0.00        0.10977868228883E+01        29.8723
 A            58      B      0.00        0.10977868228883E+01        29.8723
 A            59     A       0.00        0.11064161705843E+01        30.1071
 A            59      B      0.00        0.11064161705843E+01        30.1071
 A            60     A       0.00        0.11278894459320E+01        30.6914
 A            60      B      0.00        0.11278894459321E+01        30.6914
 A            61     A       0.00        0.11449538463201E+01        31.1558
 A            61      B      0.00        0.11449538463201E+01        31.1558
 A            62     A       0.00        0.12316360704633E+01        33.5145
 A            62      B      0.00        0.12316360704633E+01        33.5145
 A            63     A       0.00        0.12590543200842E+01        34.2606
 A            63      B      0.00        0.12590543200842E+01        34.2606
 A            64     A       0.00        0.12643271741966E+01        34.4041
 A            64      B      0.00        0.12643271741967E+01        34.4041
 A            65     A       0.00        0.12783873731162E+01        34.7867
 A            65      B      0.00        0.12783873731162E+01        34.7867
 A            66     A       0.00        0.13082285654966E+01        35.5987
 A            66      B      0.00        0.13082285654966E+01        35.5987
 A            67     A       0.00        0.14250704758818E+01        38.7781
 A            67      B      0.00        0.14250704758819E+01        38.7781
 A            68     A       0.00        0.14461004497210E+01        39.3504
 A            68      B      0.00        0.14461004497211E+01        39.3504
 A            69     A       0.00        0.15071852031034E+01        41.0126
 A            69      B      0.00        0.15071852031035E+01        41.0126
 A            70     A       0.00        0.15386900327485E+01        41.8699
 A            70      B      0.00        0.15386900327485E+01        41.8699
 A            71     A       0.00        0.16076320293134E+01        43.7459
 A            71      B      0.00        0.16076320293134E+01        43.7459
 A            72     A       0.00        0.16434711556689E+01        44.7211
 A            72      B      0.00        0.16434711556690E+01        44.7211
 A            73     A       0.00        0.16561727262596E+01        45.0668
 A            73      B      0.00        0.16561727262596E+01        45.0668
 A            74     A       0.00        0.17347148298537E+01        47.2040
 A            74      B      0.00        0.17347148298537E+01        47.2040
 A            75     A       0.00        0.17357472568812E+01        47.2321
 A            75      B      0.00        0.17357472568813E+01        47.2321
 A            76     A       0.00        0.18097025606537E+01        49.2445
 A            76      B      0.00        0.18097025606538E+01        49.2445
 A            77     A       0.00        0.18253704923243E+01        49.6709
 A            77      B      0.00        0.18253704923243E+01        49.6709
 A            78     A       0.00        0.18498018344355E+01        50.3357
 A            78      B      0.00        0.18498018344355E+01        50.3357
 A            79     A       0.00        0.18771758186856E+01        51.0806
 A            79      B      0.00        0.18771758186856E+01        51.0806
 A            80     A       0.00        0.19571849860126E+01        53.2577
 A            80      B      0.00        0.19571849860126E+01        53.2577
 A            81     A       0.00        0.19633411125994E+01        53.4252
 A            81      B      0.00        0.19633411125995E+01        53.4252
 A            82     A       0.00        0.20140018311103E+01        54.8038
 A            82      B      0.00        0.20140018311102E+01        54.8038
 A            83     A       0.00        0.20922771577984E+01        56.9338
 A            83      B      0.00        0.20922771577984E+01        56.9338
 A            84     A       0.00        0.21624520318014E+01        58.8433
 A            84      B      0.00        0.21624520318014E+01        58.8433
 A            85     A       0.00        0.21802855818854E+01        59.3286
 A            85      B      0.00        0.21802855818855E+01        59.3286
 A            86     A       0.00        0.22546887695260E+01        61.3532
 A            86      B      0.00        0.22546887695259E+01        61.3532
 A            87     A       0.00        0.22571470461847E+01        61.4201
 A            87      B      0.00        0.22571470461847E+01        61.4201
 A            88     A       0.00        0.22698513509976E+01        61.7658
 A            88      B      0.00        0.22698513509976E+01        61.7658
 A            89     A       0.00        0.23586154606264E+01        64.1812
 A            89      B      0.00        0.23586154606264E+01        64.1812
 A            90     A       0.00        0.24306713398424E+01        66.1419
 A            90      B      0.00        0.24306713398424E+01        66.1419
 A            91     A       0.00        0.24891403979420E+01        67.7330
 A            91      B      0.00        0.24891403979421E+01        67.7330
 A            92     A       0.00        0.26716949044032E+01        72.7005
 A            92      B      0.00        0.26716949044032E+01        72.7005
 A            93     A       0.00        0.27113551769608E+01        73.7797
 A            93      B      0.00        0.27113551769608E+01        73.7797
 A            94     A       0.00        0.27705678623756E+01        75.3910
 A            94      B      0.00        0.27705678623755E+01        75.3910
 A            95     A       0.00        0.27882366126102E+01        75.8718
 A            95      B      0.00        0.27882366126100E+01        75.8718
 A            96     A       0.00        0.28042602906475E+01        76.3078
 A            96      B      0.00        0.28042602906474E+01        76.3078
 A            97     A       0.00        0.28435183557290E+01        77.3761
 A            97      B      0.00        0.28435183557290E+01        77.3761
 A            98     A       0.00        0.28460735385833E+01        77.4456
 A            98      B      0.00        0.28460735385833E+01        77.4456
 A            99     A       0.00        0.28565783976895E+01        77.7315
 A            99      B      0.00        0.28565783976895E+01        77.7315
 A           100     A       0.00        0.29042782781420E+01        79.0294
 A           100      B      0.00        0.29042782781422E+01        79.0294
 A           101     A       0.00        0.29112467273951E+01        79.2191
 A           101      B      0.00        0.29112467273950E+01        79.2191
 A           102     A       0.00        0.29501969780832E+01        80.2789
 A           102      B      0.00        0.29501969780832E+01        80.2789
 A           103     A       0.00        0.29984384667407E+01        81.5917
 A           103      B      0.00        0.29984384667408E+01        81.5917
 A           104     A       0.00        0.30042944276856E+01        81.7510
 A           104      B      0.00        0.30042944276857E+01        81.7510
 A           105     A       0.00        0.30696440280934E+01        83.5293
 A           105      B      0.00        0.30696440280934E+01        83.5293
 A           106     A       0.00        0.32737010549917E+01        89.0819
 A           106      B      0.00        0.32737010549917E+01        89.0819
 A           107     A       0.00        0.33250217811813E+01        90.4784
 A           107      B      0.00        0.33250217811812E+01        90.4784
 A           108     A       0.00        0.33404267955393E+01        90.8976
 A           108      B      0.00        0.33404267955392E+01        90.8976
 A           109     A       0.00        0.33428232264637E+01        90.9628
 A           109      B      0.00        0.33428232264638E+01        90.9628
 A           110     A       0.00        0.33823061339494E+01        92.0372
 A           110      B      0.00        0.33823061339494E+01        92.0372
 A           111     A       0.00        0.34251350555504E+01        93.2027
 A           111      B      0.00        0.34251350555504E+01        93.2027
 A           112     A       0.00        0.34529680143025E+01        93.9600
 A           112      B      0.00        0.34529680143025E+01        93.9600
 A           113     A       0.00        0.34558879228480E+01        94.0395
 A           113      B      0.00        0.34558879228480E+01        94.0395
 A           114     A       0.00        0.34584799594607E+01        94.1100
 A           114      B      0.00        0.34584799594609E+01        94.1100
 A           115     A       0.00        0.34955188054143E+01        95.1179
 A           115      B      0.00        0.34955188054142E+01        95.1179
 A           116     A       0.00        0.35055045987999E+01        95.3896
 A           116      B      0.00        0.35055045987999E+01        95.3896
 A           117     A       0.00        0.35514850552688E+01        96.6408
 A           117      B      0.00        0.35514850552687E+01        96.6408
 A           118     A       0.00        0.36963515722461E+01       100.5828
 A           118      B      0.00        0.36963515722461E+01       100.5828
 A           119     A       0.00        0.37124846338094E+01       101.0218
 A           119      B      0.00        0.37124846338094E+01       101.0218
 A           120     A       0.00        0.38366653935648E+01       104.4010
 A           120      B      0.00        0.38366653935648E+01       104.4010
 A           121     A       0.00        0.38555719670980E+01       104.9155
 A           121      B      0.00        0.38555719670980E+01       104.9155
 A           122     A       0.00        0.40130310324258E+01       109.2001
 A           122      B      0.00        0.40130310324258E+01       109.2001
 A           123     A       0.00        0.40404944581844E+01       109.9474
 A           123      B      0.00        0.40404944581844E+01       109.9474
 A           124     A       0.00        0.40469191826965E+01       110.1223
 A           124      B      0.00        0.40469191826965E+01       110.1223
 A           125     A       0.00        0.42182084202923E+01       114.7833
 A           125      B      0.00        0.42182084202923E+01       114.7833
 A           126     A       0.00        0.42465173689057E+01       115.5536
 A           126      B      0.00        0.42465173689057E+01       115.5536
 A           127     A       0.00        0.43025401775949E+01       117.0781
 A           127      B      0.00        0.43025401775948E+01       117.0781
 A           128     A       0.00        0.43553536850174E+01       118.5152
 A           128      B      0.00        0.43553536850174E+01       118.5152
 A           129     A       0.00        0.44191578212248E+01       120.2514
 A           129      B      0.00        0.44191578212248E+01       120.2514
 A           130     A       0.00        0.44370881192246E+01       120.7393
 A           130      B      0.00        0.44370881192247E+01       120.7393
 A           131     A       0.00        0.45019482225531E+01       122.5042
 A           131      B      0.00        0.45019482225531E+01       122.5042
 A           132     A       0.00        0.45670033410863E+01       124.2745
 A           132      B      0.00        0.45670033410863E+01       124.2745
 A           133     A       0.00        0.46531593211493E+01       126.6189
 A           133      B      0.00        0.46531593211494E+01       126.6189
 A           134     A       0.00        0.47296019080139E+01       128.6990
 A           134      B      0.00        0.47296019080139E+01       128.6990
 A           135     A       0.00        0.47473306064556E+01       129.1814
 A           135      B      0.00        0.47473306064556E+01       129.1814
 A           136     A       0.00        0.48350222652841E+01       131.5677
 A           136      B      0.00        0.48350222652843E+01       131.5677
 A           137     A       0.00        0.49015976214247E+01       133.3793
 A           137      B      0.00        0.49015976214247E+01       133.3793
 A           138     A       0.00        0.49030781479891E+01       133.4195
 A           138      B      0.00        0.49030781479891E+01       133.4195
 A           139     A       0.00        0.49249708772608E+01       134.0153
 A           139      B      0.00        0.49249708772607E+01       134.0153
 A           140     A       0.00        0.52665702909297E+01       143.3107
 A           140      B      0.00        0.52665702909297E+01       143.3107
 A           141     A       0.00        0.54156069844629E+01       147.3662
 A           141      B      0.00        0.54156069844630E+01       147.3662
 A           142     A       0.00        0.54437867798474E+01       148.1330
 A           142      B      0.00        0.54437867798476E+01       148.1330
 A           143     A       0.00        0.54681965606440E+01       148.7972
 A           143      B      0.00        0.54681965606440E+01       148.7972
 A           144     A       0.00        0.57135637464370E+01       155.4740
 A           144      B      0.00        0.57135637464370E+01       155.4740
 A           145     A       0.00        0.57250366704683E+01       155.7862
 A           145      B      0.00        0.57250366704683E+01       155.7862
 A           146     A       0.00        0.59783857693812E+01       162.6802
 A           146      B      0.00        0.59783857693812E+01       162.6802
 A           147     A       0.00        0.60288263253739E+01       164.0527
 A           147      B      0.00        0.60288263253738E+01       164.0527
 A           148     A       0.00        0.60682057179184E+01       165.1243
 A           148      B      0.00        0.60682057179183E+01       165.1243
 A           149     A       0.00        0.63118895925473E+01       171.7553
 A           149      B      0.00        0.63118895925473E+01       171.7553
 A           150     A       0.00        0.63380218315754E+01       172.4663
 A           150      B      0.00        0.63380218315753E+01       172.4663
 A           151     A       0.00        0.64157476010528E+01       174.5814
 A           151      B      0.00        0.64157476010528E+01       174.5814
 A           152     A       0.00        0.64934265157058E+01       176.6951
 A           152      B      0.00        0.64934265157058E+01       176.6951
 A           153     A       0.00        0.65113059092997E+01       177.1816
 A           153      B      0.00        0.65113059092997E+01       177.1816
 A           154     A       0.00        0.65216291452829E+01       177.4626
 A           154      B      0.00        0.65216291452829E+01       177.4626
 A           155     A       0.00        0.65385563341481E+01       177.9232
 A           155      B      0.00        0.65385563341481E+01       177.9232
 A           156     A       0.00        0.69200748842515E+01       188.3048
 A           156      B      0.00        0.69200748842515E+01       188.3048
 A           157     A       0.00        0.69489996395973E+01       189.0919
 A           157      B      0.00        0.69489996395974E+01       189.0919
 A           158     A       0.00        0.70966296696473E+01       193.1091
 A           158      B      0.00        0.70966296696473E+01       193.1091
 A           159     A       0.00        0.72372104393477E+01       196.9345
 A           159      B      0.00        0.72372104393476E+01       196.9345
 A           160     A       0.00        0.72717326197261E+01       197.8739
 A           160      B      0.00        0.72717326197260E+01       197.8739
 A           161     A       0.00        0.74910277466618E+01       203.8412
 A           161      B      0.00        0.74910277466619E+01       203.8412
 A           162     A       0.00        0.75219002240197E+01       204.6813
 A           162      B      0.00        0.75219002240197E+01       204.6813
 A           163     A       0.00        0.78422168139507E+01       213.3976
 A           163      B      0.00        0.78422168139508E+01       213.3976
 A           164     A       0.00        0.90110896144731E+01       245.2042
 A           164      B      0.00        0.90110896144731E+01       245.2042
 A           165     A       0.00        0.91098147849715E+01       247.8907
 A           165      B      0.00        0.91098147849716E+01       247.8907
 A           166     A       0.00        0.15549289783247E+02       423.1177
 A           166      B      0.00        0.15549289783274E+02       423.1177
 A           167     A       0.00        0.53453351739989E+02      1454.5397
 A           167      B      0.00        0.53453351739989E+02      1454.5397
 A           168     A       0.00        0.57881720896010E+02      1575.0418
 A           168      B      0.00        0.57881720896010E+02      1575.0418
 A           169     A       0.00        0.58305430426513E+02      1586.5715
 A           169      B      0.00        0.58305430426513E+02      1586.5715
 A           170     A       0.00        0.12745011233917E+03      3468.0940
 A           170      B      0.00        0.12745011233929E+03      3468.0940
  
 Spin polar: 0 (Spin_A minus Spin_B electrons)


 All Electron Calculation, thus no Orbital Energies of the Core Orbitals are calculated


 Fit test: (difference of exact and fit density, squared integrated, result summed over spins)
         Sum-of-Fragments:                             0.00000000088755
         Orthogonalized Fragments:                     0.00000573097725
         SCF:                                          0.00001056622171


 ==========================
 Electron Density at Nuclei
 ==========================
  
 The electron density is calculated at points on a small sphere around the center of a nucleus.
 The printed electron density is the average electron density on these points.
 The radius of the sphere is the printed approximate finite nuclear radius.
 Note: ZORA-4 density is used, which includes small component density

         Atom        Nuclear Radius (Angstrom)             Electron Density (a.u.)
         ----        -------------------------             -----------------------
     1)   C                 0.0000320678                              126.97155
     2)   C                 0.0000320678                              126.74869
     3)   C                 0.0000320678                              126.74869
     4)   O                 0.0000345546                              313.84857
     5)   H                 0.0000181514                                0.48111
     6)   H                 0.0000181514                                0.48999
     7)   H                 0.0000181514                                0.48111
     8)   H                 0.0000181514                                0.48111
     9)   H                 0.0000181514                                0.48111
    10)   H                 0.0000181514                                0.48999


 =======================================
 M U L L I K E N   P O P U L A T I O N S
 =======================================
  
 The survey below gives for each atom:
 a) the total charge (Z minus electrons)
 b) the net spin polarization (nr of electrons spin-A minus spin-B)
 c) for each spin the atomic electron valence density (integrated) per L-value.

 Atom              Charge    Spin density          S         P         D         F
 ----              ------    ------------       ------    ------    ------    ------
 1 C               0.4013          0.0000   A:  1.5624    1.1760    0.0574    0.0036
                                            B:  1.5624    1.1760    0.0574    0.0036
 2 C               0.4948         -0.0000   A:  1.4467    1.2864    0.0185    0.0010
                                            B:  1.4467    1.2864    0.0185    0.0010
 3 C               0.4948         -0.0000   A:  1.4467    1.2864    0.0185    0.0010
                                            B:  1.4467    1.2864    0.0185    0.0010
 4 O              -0.5045          0.0000   A:  1.9370    2.2910    0.0219    0.0023
                                            B:  1.9370    2.2910    0.0219    0.0023
 5 H              -0.1506         -0.0000   A:  0.5309    0.0415    0.0029    0.0000
                                            B:  0.5309    0.0415    0.0029    0.0000
 6 H              -0.1421         -0.0000   A:  0.5308    0.0374    0.0028    0.0000
                                            B:  0.5308    0.0374    0.0028    0.0000
 7 H              -0.1506         -0.0000   A:  0.5309    0.0415    0.0029    0.0000
                                            B:  0.5309    0.0415    0.0029    0.0000
 8 H              -0.1506         -0.0000   A:  0.5309    0.0415    0.0029    0.0000
                                            B:  0.5309    0.0415    0.0029    0.0000
 9 H              -0.1506         -0.0000   A:  0.5309    0.0415    0.0029    0.0000
                                            B:  0.5309    0.0415    0.0029    0.0000
 10 H             -0.1421         -0.0000   A:  0.5308    0.0374    0.0028    0.0000
                                            B:  0.5308    0.0374    0.0028    0.0000

 Populations of individual BAS functions
 ----------------------------------------
 1 C            0.2485  0.7498  0.1421  0.4459 -0.0239 -0.1204  0.0437 -0.0271  0.4327  0.2731
                0.3331  0.0947  0.0552  0.0911  0.0133  0.0058  0.0239 -0.0073  0.0095  0.0122
                0.0023  0.0011  0.0007 -0.0019  0.0003  0.0011 -0.0024 -0.0023  0.0021  0.0026
         B:     0.2485  0.7498  0.1421  0.4459 -0.0239 -0.1204  0.0437 -0.0271  0.4327  0.2731
                0.3331  0.0947  0.0552  0.0911  0.0133  0.0058  0.0239 -0.0073  0.0095  0.0122
                0.0023  0.0011  0.0007 -0.0019  0.0003  0.0011 -0.0024 -0.0023  0.0021  0.0026
 2 C            0.2498  0.7481  0.0203  0.4539 -0.0253 -0.0583 -0.0748 -0.0594  0.3891  0.4065
                0.4054  0.0914  0.0915  0.0951  0.0060  0.0015  0.0054  0.0007  0.0045  0.0003
                0.0015  0.0004  0.0014 -0.0011  0.0001 -0.0001 -0.0007  0.0004  0.0004 -0.0013
         B:     0.2498  0.7481  0.0203  0.4539 -0.0253 -0.0583 -0.0748 -0.0594  0.3891  0.4065
                0.4054  0.0914  0.0915  0.0951  0.0060  0.0015  0.0054  0.0007  0.0045  0.0003
                0.0015  0.0004  0.0014 -0.0011  0.0001 -0.0001 -0.0007  0.0004  0.0004 -0.0013
 3 C            0.2498  0.7481  0.0203  0.4539 -0.0253 -0.0583 -0.0748 -0.0594  0.3891  0.4065
                0.4054  0.0914  0.0915  0.0951  0.0060  0.0015  0.0054  0.0007  0.0045  0.0003
                0.0015  0.0004  0.0014 -0.0011  0.0001 -0.0001 -0.0007  0.0004  0.0004 -0.0013
         B:     0.2498  0.7481  0.0203  0.4539 -0.0253 -0.0583 -0.0748 -0.0594  0.3891  0.4065
                0.4054  0.0914  0.0915  0.0951  0.0060  0.0015  0.0054  0.0007  0.0045  0.0003
                0.0015  0.0004  0.0014 -0.0011  0.0001 -0.0001 -0.0007  0.0004  0.0004 -0.0013
 4 O            0.3444  0.6259  0.0151  0.5222  0.4295  0.1705  0.1122  0.1209  0.4851  0.3644
                0.4002  0.2950  0.1965  0.1462 -0.0042  0.0001  0.0047  0.0006  0.0076  0.0131
               -0.0050 -0.0021 -0.0047  0.0003  0.0000  0.0054 -0.0021 -0.0029  0.0050  0.0084
         B:     0.3444  0.6259  0.0151  0.5222  0.4295  0.1705  0.1122  0.1209  0.4851  0.3644
                0.4002  0.2950  0.1965  0.1462 -0.0042  0.0001  0.0047  0.0006  0.0076  0.0131
               -0.0050 -0.0021 -0.0047  0.0003  0.0000  0.0054 -0.0021 -0.0029  0.0050  0.0084
 5 H            0.0343  0.3527  0.1439  0.0110  0.0159  0.0147 -0.0023  0.0006  0.0004  0.0031
                0.0006  0.0004
         B:     0.0343  0.3527  0.1439  0.0110  0.0159  0.0147 -0.0023  0.0006  0.0004  0.0031
                0.0006  0.0004
 6 H            0.0391  0.3425  0.1492  0.0120  0.0107  0.0147  0.0026  0.0005  0.0007 -0.0027
                0.0005  0.0012
         B:     0.0391  0.3425  0.1492  0.0120  0.0107  0.0147  0.0026  0.0005  0.0007 -0.0027
                0.0005  0.0012
 7 H            0.0343  0.3527  0.1439  0.0110  0.0159  0.0147 -0.0023  0.0006  0.0004  0.0031
                0.0006  0.0004
         B:     0.0343  0.3527  0.1439  0.0110  0.0159  0.0147 -0.0023  0.0006  0.0004  0.0031
                0.0006  0.0004
 8 H            0.0343  0.3527  0.1439  0.0110  0.0159  0.0147 -0.0023  0.0006  0.0004  0.0031
                0.0006  0.0004
         B:     0.0343  0.3527  0.1439  0.0110  0.0159  0.0147 -0.0023  0.0006  0.0004  0.0031
                0.0006  0.0004
 9 H            0.0343  0.3527  0.1439  0.0110  0.0159  0.0147 -0.0023  0.0006  0.0004  0.0031
                0.0006  0.0004
         B:     0.0343  0.3527  0.1439  0.0110  0.0159  0.0147 -0.0023  0.0006  0.0004  0.0031
                0.0006  0.0004
 10 H           0.0391  0.3425  0.1492  0.0120  0.0107  0.0147  0.0026  0.0005  0.0007 -0.0027
                0.0005  0.0012
         B:     0.0391  0.3425  0.1492  0.0120  0.0107  0.0147  0.0026  0.0005  0.0007 -0.0027
                0.0005  0.0012

 Gross Charges per Atom (Z minus electrons)
 ==========================================
             0.4013    0.4948    0.4948   -0.5045   -0.1506   -0.1421   -0.1506   -0.1506   -0.1506   -0.1421
 Net Total:  0.00000000


 Atom-Atom Population Matrix (off-diagonal elements not doubled)
 ===============================================================


                                   ***** SPIN 1 *****

     1 :     2.2190
     2 :     0.1986    2.0721
     3 :     0.1986   -0.0375    2.0721
     4 :     0.2687   -0.0330   -0.0330    4.0589
     5 :    -0.0146   -0.0052    0.1876    0.0003    0.4560
     6 :    -0.0135   -0.0003    0.1882   -0.0053   -0.0211    0.4459
     7 :    -0.0146   -0.0052    0.1876    0.0003   -0.0238   -0.0211    0.4560
     8 :    -0.0146    0.1876   -0.0052    0.0003   -0.0045    0.0005    0.0001    0.4560
     9 :    -0.0146    0.1876   -0.0052    0.0003    0.0001    0.0005   -0.0045   -0.0238    0.4560
    10 :    -0.0135    0.1882   -0.0003   -0.0053    0.0005   -0.0028    0.0005   -0.0211   -0.0211    0.4459

                                   ***** SPIN 2 *****

     1 :     2.2190
     2 :     0.1986    2.0721
     3 :     0.1986   -0.0375    2.0721
     4 :     0.2687   -0.0330   -0.0330    4.0589
     5 :    -0.0146   -0.0052    0.1876    0.0003    0.4560
     6 :    -0.0135   -0.0003    0.1882   -0.0053   -0.0211    0.4459
     7 :    -0.0146   -0.0052    0.1876    0.0003   -0.0238   -0.0211    0.4560
     8 :    -0.0146    0.1876   -0.0052    0.0003   -0.0045    0.0005    0.0001    0.4560
     9 :    -0.0146    0.1876   -0.0052    0.0003    0.0001    0.0005   -0.0045   -0.0238    0.4560
    10 :    -0.0135    0.1882   -0.0003   -0.0053    0.0005   -0.0028    0.0005   -0.0211   -0.0211    0.4459


 =================================================
 H I R S H F E L D   C H A R G E   A N A L Y S I S
 =================================================
  
 For each fragment: the (numerical) integral of rho(scf) * rho(fragment)/rho(sum-of-fragments)
 (nuclear charges are included, electrons are counted negative)

 The fragments and their ordering are defined in the early G E O M E T R Y output section.
 If you use single-atom fragments, this usually implies that all atoms of the same
 chemical type are grouped together. This may not be the order in which you listed them
 in the input file!

    1  C                         0.1481
    2  C                        -0.1105
    3  C                        -0.1105
    4  O                        -0.2657
    5  H                         0.0572
    6  H                         0.0549
    7  H                         0.0572
    8  H                         0.0572
    9  H                         0.0572
   10  H                         0.0549

 Sum of these charges (accuracy NumInt/Tails) =          -0.00000233


 =============================
 V O R O N O I   C H A R G E S
 =============================
  
 For each atom: the (numerical) integral of the total electronic charge density in its Voronoi cell,
 i.e. the region of space that is closer to that atom than to any other atom.
 (cf. Wigner-Seitz cells in crystals)

 Within the Voronoi cell the subintegrals over the atomic sphere and the remaining part are evaluated
 separately to give the numbers of electrons (negative charge) in these regions.
 The net total charge in the cell (including the nuclear charge) is also given.

 Values are provided for
    a) the Initial (sum-of-fragments) density
    b) the Orthogonalized-Fragments density
    c) the SCF density
    d) the Voronoi Deformation Density (VDD): the difference SCF-Initial for the complete atomic cell
 ---------------------------------------------------------------------------------------------------
 Total NetCharge:              -0.000                     -0.000                     -0.000    0.000
 (accuracy NumInt/Tails)

 Remark: the 'NetTotal' Voronoi charges often do not match the Mulliken and/or Hirshfeld charges very
 well. This is caused by the fact that chemically different atoms are not treated in accordance with
 their relative sizes. (Voronoi cells are defined by boundary planes halfway between the atoms.)
 However, the CHANGES in charge, comparing 'Initial' to 'SCF' for instance, do give a fair indication
 of the flow of charge caused by the relaxation from sum-of-fragments to self-consistency.

 Warning: the absolute accuracy of the VDD charges obtained using the Fuzzy Cells (Becke) integration
 scheme is much poorer than the one obtained with an 'equivalent' Voronoi integration grid. 


 =================================================================
 M U L T I P O L E   D E R I V E D   C H A R G E   A N A L Y S I S
 =================================================================

 This charge analysis uses the atomic multipoles (obtained from the fitted density) up to some level X,
 and reconstructs these multipoles exactly (up to level X) by distributing charges over all atoms.
 This is achieved by using Lagrange multipliers and a weight function to keep the multipoles local.

 Dummy atoms can be included (by setting INCDUM in MDC-block to 1) to obtain a fractional charge.
 This is generally useful and necessary only for small symmetrical molecules, when there are not
 enough degrees of freedom to reconstruct the multipoles.

 Since the atomic multipoles are reconstructed up to level X,
 the molecular multipoles are represented also up to level X.
 The recommended level is to reconstruct up to quadrupole : -> MDC-q charges.

 See: M. Swart, P.Th. van Duijnen, J.G. Snijders, J.Comput.Chem., (2001), p. 79-88.

 ------------------------------------------------------------------------ 
 Atomic electronic multipole moments from SCF equations (a.u.) for spin A
 ------------------------------------------------------------------------ 

   atom        charge        dip-x     dip-y     dip-z      quad-xx   quad-xy   quad-xz   quad-yy   quad-yz   quad-zz
 --------------------------------------------------------------------------------------------------------------------
    1 C      0.128268    -0.000000  0.000000 -0.012453     0.116848 -0.000000 -0.000001 -0.169720  0.000001  0.052872
    2 C      0.107647    -0.028282  0.000001  0.004675     0.013317 -0.000000 -0.009497 -0.020019 -0.000001  0.006702
    3 C      0.107647     0.028282 -0.000000  0.004674     0.013318  0.000000  0.009497 -0.020020  0.000001  0.006702
    4 O     -0.211003     0.000002  0.000001  0.133188    -0.263036 -0.000000  0.000006 -0.086823  0.000002  0.349859
    5 H     -0.023576     0.004268  0.007019  0.001446    -0.041338  0.007628  0.007562  0.046069  0.048414 -0.004732
    6 H     -0.019127     0.005503 -0.000000 -0.007440     0.042556  0.000001 -0.046195 -0.054973 -0.000001  0.012417
    7 H     -0.023576     0.004268 -0.007019  0.001446    -0.041337 -0.007630  0.007562  0.046071 -0.048414 -0.004734
    8 H     -0.023576    -0.004268 -0.007019  0.001446    -0.041338  0.007627 -0.007561  0.046066 -0.048415 -0.004728
    9 H     -0.023576    -0.004268  0.007019  0.001445    -0.041338 -0.007628 -0.007561  0.046075  0.048413 -0.004737
   10 H     -0.019127    -0.005503 -0.000000 -0.007440     0.042560  0.000002  0.046194 -0.054973  0.000002  0.012413

 ------------------------------------------------------------------------ 
 Atomic electronic multipole moments from SCF equations (a.u.) for spin B
 ------------------------------------------------------------------------ 

   atom        charge        dip-x     dip-y     dip-z      quad-xx   quad-xy   quad-xz   quad-yy   quad-yz   quad-zz
 --------------------------------------------------------------------------------------------------------------------
    1 C      0.128268    -0.000000  0.000000 -0.012453     0.116848 -0.000000 -0.000001 -0.169720  0.000001  0.052872
    2 C      0.107647    -0.028282  0.000001  0.004675     0.013317 -0.000000 -0.009497 -0.020019 -0.000001  0.006702
    3 C      0.107647     0.028282 -0.000000  0.004674     0.013318  0.000000  0.009497 -0.020020  0.000001  0.006702
    4 O     -0.211003     0.000002  0.000001  0.133188    -0.263036 -0.000000  0.000006 -0.086823  0.000002  0.349859
    5 H     -0.023576     0.004268  0.007019  0.001446    -0.041338  0.007628  0.007562  0.046069  0.048414 -0.004732
    6 H     -0.019127     0.005503 -0.000000 -0.007440     0.042556  0.000001 -0.046195 -0.054973 -0.000001  0.012417
    7 H     -0.023576     0.004268 -0.007019  0.001446    -0.041337 -0.007630  0.007562  0.046071 -0.048414 -0.004734
    8 H     -0.023576    -0.004268 -0.007019  0.001446    -0.041338  0.007627 -0.007561  0.046066 -0.048415 -0.004728
    9 H     -0.023576    -0.004268  0.007019  0.001445    -0.041338 -0.007628 -0.007561  0.046075  0.048413 -0.004737
   10 H     -0.019127    -0.005503 -0.000000 -0.007440     0.042560  0.000002  0.046194 -0.054973  0.000002  0.012413

 ----------------------------------------------------- 
 MDC atomic charges (includes spinA + spinB electrons)
 ----------------------------------------------------- 

 The MDC-m charges are just the Monopole terms in the multipole expansion, while for the MDC-d charges
 also the Dipoles are reconstructed. The usually preferred charges are the MDC-q charges.
 These reconstruct the Monopoles, Dipoles and Quadrupoles (both atomic AND molecular).

 Given here are the atomic charges of both spins added. These should be compared
 to the values from a "normal" RESTRICTED calculation.

        Atom    Level:     MDC-m        MDC-d        MDC-q
 ---------------------------------------------------------
     1     C            0.256536     0.261179     0.363135
     2     C            0.215294     0.176925     0.236125
     3     C            0.215293     0.176924     0.236128
     4     O           -0.422006    -0.491811    -0.543621
     5     H           -0.047152    -0.030434    -0.067189
     6     H           -0.038254    -0.000742    -0.011510
     7     H           -0.047152    -0.030433    -0.067186
     8     H           -0.047153    -0.030435    -0.067188
     9     H           -0.047152    -0.030432    -0.067184
    10     H           -0.038254    -0.000742    -0.011510

 -------------------------------- 
 MDC spin density (spinA - spinB)
 -------------------------------- 
 Reported here are the the number of Alpha-electrons minus the number of Beta-electrons
 per atom, which usually are regarded as spin densities.

        Atom    Level:     MDC-m        MDC-d        MDC-q
 ---------------------------------------------------------
     1     C            0.000000     0.000000    -0.000000
     2     C            0.000000     0.000000     0.000000
     3     C           -0.000000     0.000000     0.000000
     4     O            0.000000     0.000000     0.000000
     5     H           -0.000000    -0.000000    -0.000000
     6     H           -0.000000    -0.000000    -0.000000
     7     H            0.000000     0.000000    -0.000000
     8     H           -0.000000    -0.000000    -0.000000
     9     H           -0.000000    -0.000000    -0.000000
    10     H            0.000000     0.000000    -0.000000

 --------------------------------------------- 
 Represented total molecular multipole moments
 --------------------------------------------- 

 Given here are the Molecular multipole moments from the atomic charges, and from the Fit Density.
 Note that the atomic charges represent the latter, NOT the ones from the Exact density.

 Reported here are the Molecular multipole moments of both spins added.
 They should be compared to the values from a "normal" RESTRICTED calculation.

            Q (a.u.)             Dipole moment (Debye)                                          Quadrupole moment (a.u.)
                                 x         y         z              xx        xy        xz        yy        yz        zz
------------------------------------------------------------------------------------------------------------------------
MDC-m         0.0000        0.0000    0.0000    2.9494          3.0446   -0.0000   -0.0001    2.2204   -0.0000   -5.2650
MDC-d         0.0000        0.0001    0.0000    3.5645          4.5091   -0.0000   -0.0001    2.1038   -0.0001   -6.6129
MDC-q        -0.0000        0.0001    0.0000    3.3481          4.4685   -0.0000   -0.0002    2.4955   -0.0001   -6.9640
 
Fit.Dens.     0.0000        0.0001    0.0000    3.5645          4.3376   -0.0000   -0.0001    2.3646   -0.0001   -6.7022


 ==========
 S**2 value  ***  see also R. Bulo et al., J.Am.Chem.Soc., 124 (2002) 13903-13910, note (29)  ***
 ==========
  
                                       exact      expectation value

 Total S2 (S squared)                  0.00000             0.00000


 =============
 Dipole Moment  ***  (Debye)  ***
 =============
  
 Vector   :         0.00005364      0.00003656      3.56524802
 Magnitude:         3.56524802

 This molecular dipole moment is calculated with analytic integration


 =========================================
 Quadrupole Moment (Buckingham convention)  ***  (a.u.)  ***
 =========================================
  
      quad-xx        quad-xy        quad-xz        quad-yy        quad-yz        quad-zz
      4.33888215    -0.00002012    -0.00013142     2.36433320    -0.00006362    -6.70321535

 This molecular quadrupole moment is calculated with analytic integration
1


 =======================================================
 S F O   P O P U L A T I O N S ,   M O   A N A L Y S I S
 =======================================================
  
 A Mulliken population analysis is performed on (input-)selected MOs. All populations refer to SFOs.
 BAS populations may have been printed directly after the SCF part.


                                   ***** SPIN 1 *****


                                       === A ===


 SFO contributions (%) per orbital
 (multiplication by the orbital occupation yields the SFO Gross Populations)

 Orb.:        7      8      9     10     11     12     13     14     15     16     17     18     19     20
 occup:     1.00   1.00   1.00   1.00   1.00   1.00   1.00   1.00   1.00   1.00   0.00   0.00   0.00   0.00
 CF+SFO     ----   ----   ----   ----   ----   ----   ----   ----   ----   ----   ----   ----   ----   ----
 ------
      2:    0.00  20.02   0.00   0.00   0.36   0.00   0.00   0.06   0.00   0.00   0.00  -1.11  -0.00  -0.00
      3:   -0.00   1.04  -0.00   0.00   0.15   0.00   0.00   0.29   0.00   0.00   0.00  -1.59  -0.00  -0.00
      6:   10.59   0.00   0.00  22.27   0.00   0.00   5.23   0.00   0.00   0.04  -0.00  -0.00  -7.01  -0.00
      7:   -5.22   0.00   0.00   3.15   0.00  -0.00   3.56   0.00  -0.00   1.81  -0.00  -0.00 -20.57   0.00
      8:   -0.09  -0.00  -0.00  -0.32  -0.00   0.00  -0.20  -0.00  -0.00  -0.05   0.00  -0.00   1.48   0.00
      9:    0.00   0.00  21.02   0.00   0.00   0.00   0.00   0.00  16.80  -0.00  53.24   0.00   0.00   7.41
     10:   -0.00   0.00  -1.01  -0.00   0.00  -0.00   0.00   0.00   0.45  -0.00  -2.58   0.00  -0.00   7.81
     12:    0.00   1.73   0.00   0.00   8.52   0.00   0.00   6.62   0.00   0.00   0.00  -0.01  -0.00   0.00
     13:   -0.00   0.24  -0.00   0.00   0.37   0.00   0.00   7.19   0.00   0.00  -0.00  -0.02  -0.00   0.00
     18:    0.27   0.00  -0.00  -0.01   0.00   0.00   0.50   0.00   0.00   1.63   0.00   0.00   0.00   0.00
     28:   23.31   2.22   0.00  -0.09   0.04   0.00  -0.07   0.12  -0.00   0.80   0.00   1.24   0.92   0.00
     29:    0.26   0.04  -0.00  -0.08   0.02   0.00  -0.18  -0.03  -0.00  -0.40  -0.00  -5.78  -1.04   0.00
     32:   -0.46  11.97   0.00   3.68   6.73   0.00  16.24   0.15   0.00   1.95   0.00   0.16  -1.01   0.00
     33:   -0.84   0.33   0.00   0.34  -0.15  -0.00   1.38  -0.01   0.00   0.02  -0.00  -0.02  -7.47  -0.00
     35:   -0.00   0.00  18.96   0.00   0.00  22.45   0.00   0.00   1.90   0.00  -0.03   0.00   0.00   2.38
     36:   -0.00  -0.00  -1.83  -0.00   0.00   0.77   0.00  -0.00   0.47  -0.00  -0.12  -0.00  -0.00 -26.21
     38:    0.09   2.05   0.00  14.96  11.72   0.00   4.19   9.26  -0.00   1.75  -0.00   0.97   0.79   0.00
     39:   -0.01   0.05   0.00   0.57  -0.15   0.00   0.12  -0.51   0.00   0.22   0.00  -2.53  -1.99  -0.00
     54:   23.31   2.22   0.00  -0.09   0.04   0.00  -0.07   0.12  -0.00   0.80   0.00   1.24   0.92   0.00
     55:    0.26   0.04  -0.00  -0.08   0.02   0.00  -0.18  -0.03   0.00  -0.40  -0.00  -5.78  -1.04  -0.00
     58:   -0.46  11.97   0.00   3.68   6.73   0.00  16.24   0.15   0.00   1.95   0.00   0.16  -1.01   0.00
     59:   -0.84   0.33   0.00   0.34  -0.15   0.00   1.38  -0.01   0.00   0.02   0.00  -0.02  -7.47   0.00
     61:    0.00   0.00  18.96   0.00   0.00  22.45   0.00   0.00   1.90   0.00  -0.03   0.00  -0.00   2.38
     62:    0.00  -0.00  -1.83  -0.00   0.00   0.77   0.00  -0.00   0.47   0.00  -0.12  -0.00   0.00 -26.21
     64:    0.09   2.05   0.00  14.96  11.72   0.00   4.19   9.26   0.00   1.75  -0.00   0.97   0.79   0.00
     65:   -0.01   0.05   0.00   0.57  -0.15   0.00   0.12  -0.51   0.00   0.22  -0.00  -2.53  -1.99   0.00
     80:    0.00   6.31   0.00   0.00   7.20   0.00   0.00   4.64   0.00  -0.00  -0.00   0.09   0.00   0.00
     84:    0.87   0.00   0.00   8.80   0.00   0.00   0.30   0.00   0.00  85.38   0.00   0.00   0.54   0.00
     87:    0.00   0.00   4.60   0.00   0.00   0.00   0.00   0.00  62.77   0.00  32.68   0.00   0.00   0.58
     88:    0.00   0.00  -0.19  -0.00  -0.00  -0.00  -0.00   0.00   0.12  -0.00  -2.45  -0.00   0.00  -0.50
     90:    0.00   5.64   0.00   0.00  16.13   0.00  -0.00  39.44   0.00   0.00   0.00   0.08   0.00   0.00
    105:    6.75   4.15   9.56   5.68   1.68  12.26   0.88   3.07   3.36   0.57   4.69   9.80  10.18  13.24
    106:    0.05  -0.03   0.17   0.21   0.03   0.55  -0.02   0.09  -0.05  -0.01  -0.71  18.96  14.22  17.78
    107:   -0.18   0.04  -0.01  -0.00   0.01   0.03  -0.00   0.02   0.00   0.00  -0.14  -0.77  -0.16   1.18
    116:    8.01   5.99   0.00   0.48  10.29   0.00  20.31   4.35   0.00  -0.11   0.00  -0.95   5.82  -0.00
    117:   -0.02   0.03   0.00  -0.03   0.83   0.00   0.43   0.08   0.00   0.04   0.00  -0.74  15.53   0.00
    127:    6.75   4.15   9.56   5.68   1.68  12.26   0.88   3.07   3.36   0.57   4.69   9.80  10.18  13.24
    128:    0.05  -0.03   0.17   0.21   0.03   0.55  -0.02   0.09  -0.05  -0.01  -0.71  18.96  14.22  17.78
    129:   -0.18   0.04  -0.01  -0.00   0.01   0.03  -0.00   0.02   0.00   0.00  -0.14  -0.77  -0.16   1.18
    138:    6.75   4.15   9.56   5.68   1.68  12.26   0.88   3.07   3.36   0.57   4.69   9.80  10.18  13.24
    139:    0.05  -0.03   0.17   0.21   0.03   0.55  -0.02   0.09  -0.05  -0.01  -0.71  18.96  14.22  17.78
    140:   -0.18   0.04  -0.01  -0.00   0.01   0.03  -0.00   0.02   0.00   0.00  -0.14  -0.77  -0.16   1.18
    149:    6.75   4.15   9.56   5.68   1.68  12.26   0.88   3.07   3.36   0.57   4.69   9.80  10.18  13.24
    150:    0.05  -0.03   0.17   0.21   0.03   0.55  -0.02   0.09  -0.05  -0.01  -0.71  18.96  14.22  17.78
    151:   -0.18   0.04  -0.01  -0.00   0.01   0.03  -0.00   0.02   0.00   0.00  -0.14  -0.77  -0.16   1.18
    160:    8.01   5.99   0.00   0.48  10.29   0.00  20.31   4.35   0.00  -0.11   0.00  -0.95   5.82   0.00
    161:   -0.02   0.03   0.00  -0.03   0.83   0.00   0.43   0.08   0.00   0.04  -0.00  -0.74  15.53   0.00


 Summation over all MOs, multiplied by occupation: Total SFO Gross Populations in this Irrep
 ===========================================================================================

     1.00    0.56    0.00   -0.00   -0.00    0.38    0.03   -0.01    0.38   -0.01   -0.00    0.34
     0.06   -0.01    0.01    0.01    0.01    0.02    0.01    0.00    0.00    0.00    0.00    0.00
     0.00    0.00    1.00    0.46   -0.01    0.00   -0.00    0.42    0.00   -0.00    0.43   -0.01
    -0.00    0.44    0.00   -0.00    0.00    0.01    0.00    0.01    0.00    0.00    0.00    0.00
     0.00    0.00    0.00    0.00    1.00    0.46   -0.01    0.00   -0.00    0.42    0.00   -0.00
     0.43   -0.01   -0.00    0.44    0.00   -0.00    0.00    0.01    0.00    0.01    0.00    0.00
     0.00    0.00    0.00    0.00    0.00    0.00    1.00    0.94   -0.00   -0.00    0.00    0.95
    -0.00    0.00    0.67   -0.00    0.00    0.67   -0.00   -0.00    0.01    0.00    0.00    0.00
     0.01    0.00    0.00    0.00    0.00    0.00    0.00    0.00    0.53    0.00   -0.00    0.01
     0.02    0.01    0.00    0.00    0.00    0.00    0.00    0.52    0.01   -0.00    0.01    0.01
     0.01    0.00    0.00    0.00    0.00    0.00    0.53    0.00   -0.00    0.01    0.02    0.01
     0.00    0.00    0.00    0.00    0.00    0.53    0.00   -0.00    0.01    0.02    0.01    0.00
     0.00    0.00    0.00    0.00    0.53    0.00   -0.00    0.01    0.02    0.01    0.00    0.00
     0.00    0.00    0.00    0.52    0.01   -0.00    0.01    0.01    0.01    0.00    0.00    0.00
     0.00    0.00


                                   ***** SPIN 2 *****


                                       === A ===


 SFO contributions (%) per orbital
 (multiplication by the orbital occupation yields the SFO Gross Populations)

 Orb.:        7      8      9     10     11     12     13     14     15     16     17     18     19     20
 occup:     1.00   1.00   1.00   1.00   1.00   1.00   1.00   1.00   1.00   1.00   0.00   0.00   0.00   0.00
 CF+SFO     ----   ----   ----   ----   ----   ----   ----   ----   ----   ----   ----   ----   ----   ----
 ------
      2:    0.00  20.02   0.00   0.00   0.36   0.00   0.00   0.06   0.00   0.00   0.00  -1.11  -0.00  -0.00
      3:   -0.00   1.04  -0.00   0.00   0.15   0.00   0.00   0.29   0.00   0.00   0.00  -1.59  -0.00  -0.00
      6:   10.59   0.00   0.00  22.27   0.00   0.00   5.23   0.00   0.00   0.04  -0.00  -0.00  -7.01  -0.00
      7:   -5.22   0.00   0.00   3.15   0.00  -0.00   3.56   0.00  -0.00   1.81  -0.00  -0.00 -20.57   0.00
      8:   -0.09  -0.00  -0.00  -0.32  -0.00   0.00  -0.20  -0.00  -0.00  -0.05   0.00  -0.00   1.48   0.00
      9:    0.00   0.00  21.02   0.00   0.00   0.00   0.00   0.00  16.80  -0.00  53.24   0.00   0.00   7.41
     10:   -0.00   0.00  -1.01  -0.00   0.00  -0.00   0.00   0.00   0.45  -0.00  -2.58   0.00  -0.00   7.81
     12:    0.00   1.73   0.00   0.00   8.52   0.00   0.00   6.62   0.00   0.00   0.00  -0.01  -0.00   0.00
     13:   -0.00   0.24  -0.00   0.00   0.37   0.00   0.00   7.19   0.00   0.00  -0.00  -0.02  -0.00   0.00
     18:    0.27   0.00  -0.00  -0.01   0.00   0.00   0.50   0.00   0.00   1.63   0.00   0.00   0.00   0.00
     28:   23.31   2.22   0.00  -0.09   0.04   0.00  -0.07   0.12  -0.00   0.80   0.00   1.24   0.92   0.00
     29:    0.26   0.04  -0.00  -0.08   0.02   0.00  -0.18  -0.03  -0.00  -0.40  -0.00  -5.78  -1.04   0.00
     32:   -0.46  11.97   0.00   3.68   6.73   0.00  16.24   0.15   0.00   1.95   0.00   0.16  -1.01   0.00
     33:   -0.84   0.33   0.00   0.34  -0.15  -0.00   1.38  -0.01   0.00   0.02  -0.00  -0.02  -7.47  -0.00
     35:   -0.00   0.00  18.96   0.00   0.00  22.45   0.00   0.00   1.90   0.00  -0.03   0.00   0.00   2.38
     36:   -0.00  -0.00  -1.83  -0.00   0.00   0.77   0.00  -0.00   0.47  -0.00  -0.12  -0.00  -0.00 -26.21
     38:    0.09   2.05   0.00  14.96  11.72   0.00   4.19   9.26  -0.00   1.75  -0.00   0.97   0.79   0.00
     39:   -0.01   0.05   0.00   0.57  -0.15   0.00   0.12  -0.51   0.00   0.22   0.00  -2.53  -1.99  -0.00
     54:   23.31   2.22   0.00  -0.09   0.04   0.00  -0.07   0.12  -0.00   0.80   0.00   1.24   0.92   0.00
     55:    0.26   0.04  -0.00  -0.08   0.02   0.00  -0.18  -0.03   0.00  -0.40  -0.00  -5.78  -1.04  -0.00
     58:   -0.46  11.97   0.00   3.68   6.73   0.00  16.24   0.15   0.00   1.95   0.00   0.16  -1.01   0.00
     59:   -0.84   0.33   0.00   0.34  -0.15   0.00   1.38  -0.01   0.00   0.02   0.00  -0.02  -7.47   0.00
     61:    0.00   0.00  18.96   0.00   0.00  22.45   0.00   0.00   1.90   0.00  -0.03   0.00  -0.00   2.38
     62:    0.00  -0.00  -1.83  -0.00   0.00   0.77   0.00  -0.00   0.47   0.00  -0.12  -0.00   0.00 -26.21
     64:    0.09   2.05   0.00  14.96  11.72   0.00   4.19   9.26   0.00   1.75  -0.00   0.97   0.79   0.00
     65:   -0.01   0.05   0.00   0.57  -0.15   0.00   0.12  -0.51   0.00   0.22  -0.00  -2.53  -1.99   0.00
     80:    0.00   6.31   0.00   0.00   7.20   0.00   0.00   4.64   0.00  -0.00  -0.00   0.09   0.00   0.00
     84:    0.87   0.00   0.00   8.80   0.00   0.00   0.30   0.00   0.00  85.38   0.00   0.00   0.54   0.00
     87:    0.00   0.00   4.60   0.00   0.00   0.00   0.00   0.00  62.77   0.00  32.68   0.00   0.00   0.58
     88:    0.00   0.00  -0.19  -0.00  -0.00  -0.00  -0.00   0.00   0.12  -0.00  -2.45  -0.00   0.00  -0.50
     90:    0.00   5.64   0.00   0.00  16.13   0.00  -0.00  39.44   0.00   0.00   0.00   0.08   0.00   0.00
    105:    6.75   4.15   9.56   5.68   1.68  12.26   0.88   3.07   3.36   0.57   4.69   9.80  10.18  13.24
    106:    0.05  -0.03   0.17   0.21   0.03   0.55  -0.02   0.09  -0.05  -0.01  -0.71  18.96  14.22  17.78
    107:   -0.18   0.04  -0.01  -0.00   0.01   0.03  -0.00   0.02   0.00   0.00  -0.14  -0.77  -0.16   1.18
    116:    8.01   5.99   0.00   0.48  10.29   0.00  20.31   4.35   0.00  -0.11   0.00  -0.95   5.82  -0.00
    117:   -0.02   0.03   0.00  -0.03   0.83   0.00   0.43   0.08   0.00   0.04   0.00  -0.74  15.53   0.00
    127:    6.75   4.15   9.56   5.68   1.68  12.26   0.88   3.07   3.36   0.57   4.69   9.80  10.18  13.24
    128:    0.05  -0.03   0.17   0.21   0.03   0.55  -0.02   0.09  -0.05  -0.01  -0.71  18.96  14.22  17.78
    129:   -0.18   0.04  -0.01  -0.00   0.01   0.03  -0.00   0.02   0.00   0.00  -0.14  -0.77  -0.16   1.18
    138:    6.75   4.15   9.56   5.68   1.68  12.26   0.88   3.07   3.36   0.57   4.69   9.80  10.18  13.24
    139:    0.05  -0.03   0.17   0.21   0.03   0.55  -0.02   0.09  -0.05  -0.01  -0.71  18.96  14.22  17.78
    140:   -0.18   0.04  -0.01  -0.00   0.01   0.03  -0.00   0.02   0.00   0.00  -0.14  -0.77  -0.16   1.18
    149:    6.75   4.15   9.56   5.68   1.68  12.26   0.88   3.07   3.36   0.57   4.69   9.80  10.18  13.24
    150:    0.05  -0.03   0.17   0.21   0.03   0.55  -0.02   0.09  -0.05  -0.01  -0.71  18.96  14.22  17.78
    151:   -0.18   0.04  -0.01  -0.00   0.01   0.03  -0.00   0.02   0.00   0.00  -0.14  -0.77  -0.16   1.18
    160:    8.01   5.99   0.00   0.48  10.29   0.00  20.31   4.35   0.00  -0.11   0.00  -0.95   5.82   0.00
    161:   -0.02   0.03   0.00  -0.03   0.83   0.00   0.43   0.08   0.00   0.04  -0.00  -0.74  15.53   0.00


 Summation over all MOs, multiplied by occupation: Total SFO Gross Populations in this Irrep
 ===========================================================================================

     1.00    0.56    0.00   -0.00   -0.00    0.38    0.03   -0.01    0.38   -0.01   -0.00    0.34
     0.06   -0.01    0.01    0.01    0.01    0.02    0.01    0.00    0.00    0.00    0.00    0.00
     0.00    0.00    1.00    0.46   -0.01    0.00   -0.00    0.42    0.00   -0.00    0.43   -0.01
    -0.00    0.44    0.00   -0.00    0.00    0.01    0.00    0.01    0.00    0.00    0.00    0.00
     0.00    0.00    0.00    0.00    1.00    0.46   -0.01    0.00   -0.00    0.42    0.00   -0.00
     0.43   -0.01   -0.00    0.44    0.00   -0.00    0.00    0.01    0.00    0.01    0.00    0.00
     0.00    0.00    0.00    0.00    0.00    0.00    1.00    0.94   -0.00   -0.00    0.00    0.95
    -0.00    0.00    0.67   -0.00    0.00    0.67   -0.00   -0.00    0.01    0.00    0.00    0.00
     0.01    0.00    0.00    0.00    0.00    0.00    0.00    0.00    0.53    0.00   -0.00    0.01
     0.02    0.01    0.00    0.00    0.00    0.00    0.00    0.52    0.01   -0.00    0.01    0.01
     0.01    0.00    0.00    0.00    0.00    0.00    0.53    0.00   -0.00    0.01    0.02    0.01
     0.00    0.00    0.00    0.00    0.00    0.53    0.00   -0.00    0.01    0.02    0.01    0.00
     0.00    0.00    0.00    0.00    0.53    0.00   -0.00    0.01    0.02    0.01    0.00    0.00
     0.00    0.00    0.00    0.52    0.01   -0.00    0.01    0.01    0.01    0.00    0.00    0.00
     0.00    0.00


 List of all MOs, ordered by energy, with the most significant SFO gross populations
 ===================================================================================

 Each percentage contribution in the table below corresponds to the indicated SFO.
 In general, a SFO may be a linear combination of several Fragment Orbitals on the same,
 or on symmetry-related Fragments. Only the first 'member' of such a combination is
 specified here. A full definition of all SFOs is given in an earlier part of the output.
 The numbering of the SFOs in this table does NOT include the Core Orbitals, and starts
 from one for each symmetry representation, as in the SFO definition list earlier.


                                       *** SPIN 1 ***


       E(eV)  Occ       MO           %     SFO (first member)   E(eV)  Occ   Fragment
 -------------------------------------------------------------------------------------

     -24.350  1.00     5 A         64.94%     2 S             -23.988  2.00     4 O
                                   18.94%     2 S             -13.774  2.00     1 C
                                    5.82%     1 P:z            -9.043  1.33     4 O
                                    5.41%     1 P:z            -5.296  0.67     1 C
                                    1.81%     2 S             -13.774  2.00     2 C
                                    1.81%     2 S             -13.774  2.00     3 C
     -19.314  1.00     6 A         17.81%     2 S             -13.774  2.00     2 C
                                   17.81%     2 S             -13.774  2.00     3 C
                                   16.60%     2 S             -13.774  2.00     1 C
                                   11.67%     1 P:z            -5.296  0.67     1 C
                                   10.90%     2 S             -23.988  2.00     4 O
                                    4.75%     1 S              -6.494  1.00     8 H
                                    4.75%     1 S              -6.494  1.00     5 H
                                    4.75%     1 S              -6.494  1.00     9 H
                                    4.75%     1 S              -6.494  1.00     7 H
                                    2.65%     1 S              -6.494  1.00     6 H
                                    2.65%     1 S              -6.494  1.00    10 H
                                    1.32%     1 P:x            -5.296  0.67     2 C
                                    1.32%     1 P:x            -5.296  0.67     3 C
                                   -1.15%     2 P:z             4.669  0.00     1 C
     -17.902  1.00     7 A         23.31%     2 S             -13.774  2.00     3 C
                                   23.31%     2 S             -13.774  2.00     2 C
                                   10.59%     1 P:x            -5.296  0.67     1 C
                                    8.01%     1 S              -6.494  1.00     6 H
                                    8.01%     1 S              -6.494  1.00    10 H
                                    6.75%     1 S              -6.494  1.00     9 H
                                    6.75%     1 S              -6.494  1.00     7 H
                                    6.75%     1 S              -6.494  1.00     5 H
                                    6.75%     1 S              -6.494  1.00     8 H
                                   -5.22%     2 P:x             4.669  0.00     1 C
     -13.431  1.00     8 A         20.02%     2 S             -13.774  2.00     1 C
                                   11.97%     1 P:x            -5.296  0.67     3 C
                                   11.97%     1 P:x            -5.296  0.67     2 C
                                    6.31%     2 S             -23.988  2.00     4 O
                                    5.99%     1 S              -6.494  1.00    10 H
                                    5.99%     1 S              -6.494  1.00     6 H
                                    5.64%     1 P:z            -9.043  1.33     4 O
                                    4.15%     1 S              -6.494  1.00     5 H
                                    4.15%     1 S              -6.494  1.00     9 H
                                    4.15%     1 S              -6.494  1.00     8 H
                                    4.15%     1 S              -6.494  1.00     7 H
                                    2.22%     2 S             -13.774  2.00     3 C
                                    2.22%     2 S             -13.774  2.00     2 C
                                    2.05%     1 P:z            -5.296  0.67     2 C
                                    2.05%     1 P:z            -5.296  0.67     3 C
                                    1.73%     1 P:z            -5.296  0.67     1 C
                                    1.04%     3 S              10.242  0.00     1 C
     -11.331  1.00     9 A         21.02%     1 P:y            -5.296  0.67     1 C
                                   18.96%     1 P:y            -5.296  0.67     2 C
                                   18.96%     1 P:y            -5.296  0.67     3 C
                                    9.56%     1 S              -6.494  1.00     8 H
                                    9.56%     1 S              -6.494  1.00     5 H
                                    9.56%     1 S              -6.494  1.00     9 H
                                    9.56%     1 S              -6.494  1.00     7 H
                                    4.60%     1 P:y            -9.043  1.33     4 O
                                   -1.83%     2 P:y             4.669  0.00     2 C
                                   -1.83%     2 P:y             4.669  0.00     3 C
                                   -1.01%     2 P:y             4.669  0.00     1 C
     -11.231  1.00    10 A         22.27%     1 P:x            -5.296  0.67     1 C
                                   14.96%     1 P:z            -5.296  0.67     2 C
                                   14.96%     1 P:z            -5.296  0.67     3 C
                                    8.80%     1 P:x            -9.043  1.33     4 O
                                    5.68%     1 S              -6.494  1.00     7 H
                                    5.68%     1 S              -6.494  1.00     9 H
                                    5.68%     1 S              -6.494  1.00     5 H
                                    5.68%     1 S              -6.494  1.00     8 H
                                    3.68%     1 P:x            -5.296  0.67     3 C
                                    3.68%     1 P:x            -5.296  0.67     2 C
                                    3.15%     2 P:x             4.669  0.00     1 C
     -10.993  1.00    11 A         16.13%     1 P:z            -9.043  1.33     4 O
                                   11.72%     1 P:z            -5.296  0.67     3 C
                                   11.72%     1 P:z            -5.296  0.67     2 C
                                   10.29%     1 S              -6.494  1.00    10 H
                                   10.29%     1 S              -6.494  1.00     6 H
                                    8.52%     1 P:z            -5.296  0.67     1 C
                                    7.20%     2 S             -23.988  2.00     4 O
                                    6.73%     1 P:x            -5.296  0.67     2 C
                                    6.73%     1 P:x            -5.296  0.67     3 C
                                    1.68%     1 S              -6.494  1.00     8 H
                                    1.68%     1 S              -6.494  1.00     5 H
                                    1.68%     1 S              -6.494  1.00     9 H
                                    1.68%     1 S              -6.494  1.00     7 H
     -10.043  1.00    12 A         22.45%     1 P:y            -5.296  0.67     3 C
                                   22.45%     1 P:y            -5.296  0.67     2 C
                                   12.26%     1 S              -6.494  1.00     7 H
                                   12.26%     1 S              -6.494  1.00     9 H
                                   12.26%     1 S              -6.494  1.00     8 H
                                   12.26%     1 S              -6.494  1.00     5 H
      -9.433  1.00    13 A         20.31%     1 S              -6.494  1.00     6 H
                                   20.31%     1 S              -6.494  1.00    10 H
                                   16.24%     1 P:x            -5.296  0.67     2 C
                                   16.24%     1 P:x            -5.296  0.67     3 C
                                    5.23%     1 P:x            -5.296  0.67     1 C
                                    4.19%     1 P:z            -5.296  0.67     3 C
                                    4.19%     1 P:z            -5.296  0.67     2 C
                                    3.56%     2 P:x             4.669  0.00     1 C
                                    1.38%     2 P:x             4.669  0.00     2 C
                                    1.38%     2 P:x             4.669  0.00     3 C
      -9.027  1.00    14 A         39.44%     1 P:z            -9.043  1.33     4 O
                                    9.26%     1 P:z            -5.296  0.67     2 C
                                    9.26%     1 P:z            -5.296  0.67     3 C
                                    7.19%     2 P:z             4.669  0.00     1 C
                                    6.62%     1 P:z            -5.296  0.67     1 C
                                    4.64%     2 S             -23.988  2.00     4 O
                                    4.35%     1 S              -6.494  1.00    10 H
                                    4.35%     1 S              -6.494  1.00     6 H
                                    3.07%     1 S              -6.494  1.00     8 H
                                    3.07%     1 S              -6.494  1.00     5 H
                                    3.07%     1 S              -6.494  1.00     9 H
                                    3.07%     1 S              -6.494  1.00     7 H
      -7.759  1.00    15 A         62.77%     1 P:y            -9.043  1.33     4 O
                                   16.80%     1 P:y            -5.296  0.67     1 C
                                    3.36%     1 S              -6.494  1.00     7 H
                                    3.36%     1 S              -6.494  1.00     9 H
                                    3.36%     1 S              -6.494  1.00     8 H
                                    3.36%     1 S              -6.494  1.00     5 H
                                    1.90%     1 P:y            -5.296  0.67     3 C
                                    1.90%     1 P:y            -5.296  0.67     2 C
      -5.500  1.00    16 A         85.38%     1 P:x            -9.043  1.33     4 O
                                    1.95%     1 P:x            -5.296  0.67     3 C
                                    1.95%     1 P:x            -5.296  0.67     2 C
                                    1.81%     2 P:x             4.669  0.00     1 C
                                    1.75%     1 P:z            -5.296  0.67     2 C
                                    1.75%     1 P:z            -5.296  0.67     3 C
                                    1.63%     1 D:xz           33.617  0.00     1 C
      -2.378  0.00    17 A         53.24%     1 P:y            -5.296  0.67     1 C
                                   32.68%     1 P:y            -9.043  1.33     4 O
                                    4.69%     1 S              -6.494  1.00     9 H
                                    4.69%     1 S              -6.494  1.00     7 H
                                    4.69%     1 S              -6.494  1.00     5 H
                                    4.69%     1 S              -6.494  1.00     8 H
                                   -2.58%     2 P:y             4.669  0.00     1 C
                                   -2.45%     2 P:y             9.607  0.00     4 O
      -0.408  0.00    18 A         18.96%     2 S               2.470  0.00     7 H
                                   18.96%     2 S               2.470  0.00     8 H
                                   18.96%     2 S               2.470  0.00     5 H
                                   18.96%     2 S               2.470  0.00     9 H
                                    9.80%     1 S              -6.494  1.00     7 H
                                    9.80%     1 S              -6.494  1.00     8 H
                                    9.80%     1 S              -6.494  1.00     9 H
                                    9.80%     1 S              -6.494  1.00     5 H
                                   -5.78%     3 S              10.242  0.00     3 C
                                   -5.78%     3 S              10.242  0.00     2 C
                                   -2.53%     2 P:z             4.669  0.00     3 C
                                   -2.53%     2 P:z             4.669  0.00     2 C
                                   -1.59%     3 S              10.242  0.00     1 C
                                    1.24%     2 S             -13.774  2.00     3 C
                                    1.24%     2 S             -13.774  2.00     2 C
                                   -1.11%     2 S             -13.774  2.00     1 C
       0.637  0.00    19 A        -20.57%     2 P:x             4.669  0.00     1 C
                                   15.53%     2 S               2.470  0.00    10 H
                                   15.53%     2 S               2.470  0.00     6 H
                                   14.22%     2 S               2.470  0.00     9 H
                                   14.22%     2 S               2.470  0.00     7 H
                                   14.22%     2 S               2.470  0.00     8 H
                                   14.22%     2 S               2.470  0.00     5 H
                                   10.18%     1 S              -6.494  1.00     9 H
                                   10.18%     1 S              -6.494  1.00     7 H
                                   10.18%     1 S              -6.494  1.00     5 H
                                   10.18%     1 S              -6.494  1.00     8 H
                                   -7.47%     2 P:x             4.669  0.00     3 C
                                   -7.47%     2 P:x             4.669  0.00     2 C
                                   -7.01%     1 P:x            -5.296  0.67     1 C
                                    5.82%     1 S              -6.494  1.00    10 H
                                    5.82%     1 S              -6.494  1.00     6 H
                                   -1.99%     2 P:z             4.669  0.00     2 C
                                   -1.99%     2 P:z             4.669  0.00     3 C
                                    1.48%     3 P:x            55.182  0.00     1 C
                                   -1.04%     3 S              10.242  0.00     2 C
                                   -1.04%     3 S              10.242  0.00     3 C
                                   -1.01%     1 P:x            -5.296  0.67     3 C
                                   -1.01%     1 P:x            -5.296  0.67     2 C
       1.021  0.00    20 A        -26.21%     2 P:y             4.669  0.00     3 C
                                  -26.21%     2 P:y             4.669  0.00     2 C
                                   17.78%     2 S               2.470  0.00     9 H
                                   17.78%     2 S               2.470  0.00     5 H
                                   17.78%     2 S               2.470  0.00     7 H
                                   17.78%     2 S               2.470  0.00     8 H
                                   13.24%     1 S              -6.494  1.00     5 H
                                   13.24%     1 S              -6.494  1.00     8 H
                                   13.24%     1 S              -6.494  1.00     9 H
                                   13.24%     1 S              -6.494  1.00     7 H
                                    7.81%     2 P:y             4.669  0.00     1 C
                                    7.41%     1 P:y            -5.296  0.67     1 C
                                    2.38%     1 P:y            -5.296  0.67     3 C
                                    2.38%     1 P:y            -5.296  0.67     2 C
                                    1.18%     3 S              41.412  0.00     8 H
                                    1.18%     3 S              41.412  0.00     5 H
                                    1.18%     3 S              41.412  0.00     7 H
                                    1.18%     3 S              41.412  0.00     9 H
       1.269  0.00    21 A         35.04%     1 S              -6.494  1.00     6 H
                                   35.04%     1 S              -6.494  1.00    10 H
                                   19.30%     2 S               2.470  0.00     6 H
                                   19.29%     2 S               2.470  0.00    10 H
                                  -15.17%     2 P:z             4.669  0.00     3 C
                                  -15.17%     2 P:z             4.669  0.00     2 C
                                    8.56%     1 P:z            -5.296  0.67     2 C
                                    8.56%     1 P:z            -5.296  0.67     3 C
                                    3.00%     1 S              -6.494  1.00     9 H
                                    3.00%     1 S              -6.494  1.00     8 H
                                    3.00%     1 S              -6.494  1.00     7 H
                                    3.00%     1 S              -6.494  1.00     5 H
                                   -2.84%     2 S               2.470  0.00     7 H
                                   -2.84%     2 S               2.470  0.00     9 H
                                   -2.84%     2 S               2.470  0.00     8 H
                                   -2.84%     2 S               2.470  0.00     5 H
                                    1.53%     1 P:z            -9.043  1.33     4 O
                                   -1.51%     2 P:x             4.669  0.00     2 C
                                   -1.50%     2 P:x             4.669  0.00     3 C
                                    1.41%     1 P:z            -5.296  0.67     1 C
       1.962  0.00    22 A         30.18%     1 S              -6.494  1.00     6 H
                                   30.18%     1 S              -6.494  1.00    10 H
                                   14.43%     2 S               2.470  0.00     6 H
                                   14.43%     2 S               2.470  0.00    10 H
                                  -12.29%     2 P:z             4.669  0.00     3 C
                                  -12.29%     2 P:z             4.669  0.00     2 C
                                   -7.13%     2 P:x             4.669  0.00     2 C
                                   -7.13%     2 P:x             4.669  0.00     3 C
                                    6.05%     1 S              -6.494  1.00     8 H
                                    6.05%     1 S              -6.494  1.00     7 H
                                    6.05%     1 S              -6.494  1.00     5 H
                                    6.05%     1 S              -6.494  1.00     9 H
                                    5.88%     1 P:x            -5.296  0.67     2 C
                                    5.88%     1 P:x            -5.296  0.67     3 C
                                   -2.82%     2 P:x             4.669  0.00     1 C
                                    2.39%     1 P:z            -5.296  0.67     3 C
                                    2.39%     1 P:z            -5.296  0.67     2 C
                                    1.36%     3 S              41.412  0.00    10 H
                                    1.36%     3 S              41.412  0.00     6 H
       2.048  0.00    23 A         24.75%     1 S              -6.494  1.00     9 H
                                   24.75%     1 S              -6.494  1.00     7 H
                                   24.75%     1 S              -6.494  1.00     5 H
                                   24.75%     1 S              -6.494  1.00     8 H
                                  -21.13%     2 P:y             4.669  0.00     2 C
                                  -21.13%     2 P:y             4.669  0.00     3 C
                                   10.09%     1 P:y            -5.296  0.67     3 C
                                   10.09%     1 P:y            -5.296  0.67     2 C
                                    3.33%     2 S               2.470  0.00     5 H
                                    3.33%     2 S               2.470  0.00     8 H
                                    3.33%     2 S               2.470  0.00     9 H
                                    3.33%     2 S               2.470  0.00     7 H
                                    1.57%     3 S              41.412  0.00     5 H
                                    1.57%     3 S              41.412  0.00     8 H
                                    1.57%     3 S              41.412  0.00     9 H
                                    1.57%     3 S              41.412  0.00     7 H
       2.310  0.00    24 A        -21.87%     3 S              10.242  0.00     1 C
                                   20.15%     2 P:z             4.669  0.00     2 C
                                   20.15%     2 P:z             4.669  0.00     3 C
                                   13.45%     2 P:x             4.669  0.00     3 C
                                   13.45%     2 P:x             4.669  0.00     2 C
                                   11.24%     1 P:x            -5.296  0.67     3 C
                                   11.24%     1 P:x            -5.296  0.67     2 C
                                    7.62%     1 P:z            -5.296  0.67     1 C
                                    5.53%     1 P:z            -5.296  0.67     2 C
                                    5.53%     1 P:z            -5.296  0.67     3 C
                                    4.75%     2 S               2.470  0.00    10 H
                                    4.75%     2 S               2.470  0.00     6 H
                                    2.25%     2 P:z             4.669  0.00     1 C
                                   -1.69%     3 S              21.640  0.00     4 O
                                    1.20%     1 S              -6.494  1.00    10 H
                                    1.20%     1 S              -6.494  1.00     6 H
       2.827  0.00    25 A         16.49%     2 S             -13.774  2.00     1 C
                                   15.78%     2 P:z             4.669  0.00     3 C
                                   15.78%     2 P:z             4.669  0.00     2 C
                                   12.11%     1 P:x            -5.296  0.67     2 C
                                   12.11%     1 P:x            -5.296  0.67     3 C
                                   10.69%     2 P:x             4.669  0.00     2 C
                                   10.69%     2 P:x             4.669  0.00     3 C
                                    6.87%     1 S              -6.494  1.00    10 H
                                    6.87%     1 S              -6.494  1.00     6 H
                                   -6.65%     3 S              10.242  0.00     1 C
                                   -6.24%     2 P:z             4.669  0.00     1 C
                                    5.34%     1 P:z            -9.043  1.33     4 O
                                    3.79%     1 P:z            -5.296  0.67     3 C
                                    3.79%     1 P:z            -5.296  0.67     2 C
                                   -3.41%     1 P:z            -5.296  0.67     1 C
                                   -2.04%     2 S               2.470  0.00    10 H
                                   -2.04%     2 S               2.470  0.00     6 H
                                   -1.90%     3 S              41.412  0.00     6 H
                                   -1.90%     3 S              41.412  0.00    10 H
                                   -1.71%     3 S              21.640  0.00     4 O
                                    1.16%     1 P:x            11.031  0.00     8 H
                                    1.16%     1 P:x            11.031  0.00     5 H
                                    1.15%     1 P:x            11.031  0.00     9 H
                                    1.15%     1 P:x            11.031  0.00     7 H


                                       *** SPIN 2 ***


       E(eV)  Occ       MO           %     SFO (first member)   E(eV)  Occ   Fragment
 -------------------------------------------------------------------------------------

     -24.350  1.00     5 A         64.94%     2 S             -23.988  2.00     4 O
                                   18.94%     2 S             -13.774  2.00     1 C
                                    5.82%     1 P:z            -9.043  1.33     4 O
                                    5.41%     1 P:z            -5.296  0.67     1 C
                                    1.81%     2 S             -13.774  2.00     2 C
                                    1.81%     2 S             -13.774  2.00     3 C
     -19.314  1.00     6 A         17.81%     2 S             -13.774  2.00     2 C
                                   17.81%     2 S             -13.774  2.00     3 C
                                   16.60%     2 S             -13.774  2.00     1 C
                                   11.67%     1 P:z            -5.296  0.67     1 C
                                   10.90%     2 S             -23.988  2.00     4 O
                                    4.75%     1 S              -6.494  1.00     8 H
                                    4.75%     1 S              -6.494  1.00     5 H
                                    4.75%     1 S              -6.494  1.00     9 H
                                    4.75%     1 S              -6.494  1.00     7 H
                                    2.65%     1 S              -6.494  1.00     6 H
                                    2.65%     1 S              -6.494  1.00    10 H
                                    1.32%     1 P:x            -5.296  0.67     2 C
                                    1.32%     1 P:x            -5.296  0.67     3 C
                                   -1.15%     2 P:z             4.669  0.00     1 C
     -17.902  1.00     7 A         23.31%     2 S             -13.774  2.00     3 C
                                   23.31%     2 S             -13.774  2.00     2 C
                                   10.59%     1 P:x            -5.296  0.67     1 C
                                    8.01%     1 S              -6.494  1.00     6 H
                                    8.01%     1 S              -6.494  1.00    10 H
                                    6.75%     1 S              -6.494  1.00     9 H
                                    6.75%     1 S              -6.494  1.00     7 H
                                    6.75%     1 S              -6.494  1.00     5 H
                                    6.75%     1 S              -6.494  1.00     8 H
                                   -5.22%     2 P:x             4.669  0.00     1 C
     -13.431  1.00     8 A         20.02%     2 S             -13.774  2.00     1 C
                                   11.97%     1 P:x            -5.296  0.67     3 C
                                   11.97%     1 P:x            -5.296  0.67     2 C
                                    6.31%     2 S             -23.988  2.00     4 O
                                    5.99%     1 S              -6.494  1.00    10 H
                                    5.99%     1 S              -6.494  1.00     6 H
                                    5.64%     1 P:z            -9.043  1.33     4 O
                                    4.15%     1 S              -6.494  1.00     5 H
                                    4.15%     1 S              -6.494  1.00     9 H
                                    4.15%     1 S              -6.494  1.00     8 H
                                    4.15%     1 S              -6.494  1.00     7 H
                                    2.22%     2 S             -13.774  2.00     3 C
                                    2.22%     2 S             -13.774  2.00     2 C
                                    2.05%     1 P:z            -5.296  0.67     2 C
                                    2.05%     1 P:z            -5.296  0.67     3 C
                                    1.73%     1 P:z            -5.296  0.67     1 C
                                    1.04%     3 S              10.242  0.00     1 C
     -11.331  1.00     9 A         21.02%     1 P:y            -5.296  0.67     1 C
                                   18.96%     1 P:y            -5.296  0.67     2 C
                                   18.96%     1 P:y            -5.296  0.67     3 C
                                    9.56%     1 S              -6.494  1.00     8 H
                                    9.56%     1 S              -6.494  1.00     5 H
                                    9.56%     1 S              -6.494  1.00     9 H
                                    9.56%     1 S              -6.494  1.00     7 H
                                    4.60%     1 P:y            -9.043  1.33     4 O
                                   -1.83%     2 P:y             4.669  0.00     2 C
                                   -1.83%     2 P:y             4.669  0.00     3 C
                                   -1.01%     2 P:y             4.669  0.00     1 C
     -11.231  1.00    10 A         22.27%     1 P:x            -5.296  0.67     1 C
                                   14.96%     1 P:z            -5.296  0.67     2 C
                                   14.96%     1 P:z            -5.296  0.67     3 C
                                    8.80%     1 P:x            -9.043  1.33     4 O
                                    5.68%     1 S              -6.494  1.00     7 H
                                    5.68%     1 S              -6.494  1.00     9 H
                                    5.68%     1 S              -6.494  1.00     5 H
                                    5.68%     1 S              -6.494  1.00     8 H
                                    3.68%     1 P:x            -5.296  0.67     3 C
                                    3.68%     1 P:x            -5.296  0.67     2 C
                                    3.15%     2 P:x             4.669  0.00     1 C
     -10.993  1.00    11 A         16.13%     1 P:z            -9.043  1.33     4 O
                                   11.72%     1 P:z            -5.296  0.67     3 C
                                   11.72%     1 P:z            -5.296  0.67     2 C
                                   10.29%     1 S              -6.494  1.00    10 H
                                   10.29%     1 S              -6.494  1.00     6 H
                                    8.52%     1 P:z            -5.296  0.67     1 C
                                    7.20%     2 S             -23.988  2.00     4 O
                                    6.73%     1 P:x            -5.296  0.67     2 C
                                    6.73%     1 P:x            -5.296  0.67     3 C
                                    1.68%     1 S              -6.494  1.00     8 H
                                    1.68%     1 S              -6.494  1.00     5 H
                                    1.68%     1 S              -6.494  1.00     9 H
                                    1.68%     1 S              -6.494  1.00     7 H
     -10.043  1.00    12 A         22.45%     1 P:y            -5.296  0.67     3 C
                                   22.45%     1 P:y            -5.296  0.67     2 C
                                   12.26%     1 S              -6.494  1.00     7 H
                                   12.26%     1 S              -6.494  1.00     9 H
                                   12.26%     1 S              -6.494  1.00     8 H
                                   12.26%     1 S              -6.494  1.00     5 H
      -9.433  1.00    13 A         20.31%     1 S              -6.494  1.00     6 H
                                   20.31%     1 S              -6.494  1.00    10 H
                                   16.24%     1 P:x            -5.296  0.67     2 C
                                   16.24%     1 P:x            -5.296  0.67     3 C
                                    5.23%     1 P:x            -5.296  0.67     1 C
                                    4.19%     1 P:z            -5.296  0.67     3 C
                                    4.19%     1 P:z            -5.296  0.67     2 C
                                    3.56%     2 P:x             4.669  0.00     1 C
                                    1.38%     2 P:x             4.669  0.00     2 C
                                    1.38%     2 P:x             4.669  0.00     3 C
      -9.027  1.00    14 A         39.44%     1 P:z            -9.043  1.33     4 O
                                    9.26%     1 P:z            -5.296  0.67     2 C
                                    9.26%     1 P:z            -5.296  0.67     3 C
                                    7.19%     2 P:z             4.669  0.00     1 C
                                    6.62%     1 P:z            -5.296  0.67     1 C
                                    4.64%     2 S             -23.988  2.00     4 O
                                    4.35%     1 S              -6.494  1.00    10 H
                                    4.35%     1 S              -6.494  1.00     6 H
                                    3.07%     1 S              -6.494  1.00     8 H
                                    3.07%     1 S              -6.494  1.00     5 H
                                    3.07%     1 S              -6.494  1.00     9 H
                                    3.07%     1 S              -6.494  1.00     7 H
      -7.759  1.00    15 A         62.77%     1 P:y            -9.043  1.33     4 O
                                   16.80%     1 P:y            -5.296  0.67     1 C
                                    3.36%     1 S              -6.494  1.00     7 H
                                    3.36%     1 S              -6.494  1.00     9 H
                                    3.36%     1 S              -6.494  1.00     8 H
                                    3.36%     1 S              -6.494  1.00     5 H
                                    1.90%     1 P:y            -5.296  0.67     3 C
                                    1.90%     1 P:y            -5.296  0.67     2 C
      -5.500  1.00    16 A         85.38%     1 P:x            -9.043  1.33     4 O
                                    1.95%     1 P:x            -5.296  0.67     3 C
                                    1.95%     1 P:x            -5.296  0.67     2 C
                                    1.81%     2 P:x             4.669  0.00     1 C
                                    1.75%     1 P:z            -5.296  0.67     2 C
                                    1.75%     1 P:z            -5.296  0.67     3 C
                                    1.63%     1 D:xz           33.617  0.00     1 C
      -2.378  0.00    17 A         53.24%     1 P:y            -5.296  0.67     1 C
                                   32.68%     1 P:y            -9.043  1.33     4 O
                                    4.69%     1 S              -6.494  1.00     9 H
                                    4.69%     1 S              -6.494  1.00     7 H
                                    4.69%     1 S              -6.494  1.00     5 H
                                    4.69%     1 S              -6.494  1.00     8 H
                                   -2.58%     2 P:y             4.669  0.00     1 C
                                   -2.45%     2 P:y             9.607  0.00     4 O
      -0.408  0.00    18 A         18.96%     2 S               2.470  0.00     7 H
                                   18.96%     2 S               2.470  0.00     8 H
                                   18.96%     2 S               2.470  0.00     5 H
                                   18.96%     2 S               2.470  0.00     9 H
                                    9.80%     1 S              -6.494  1.00     7 H
                                    9.80%     1 S              -6.494  1.00     8 H
                                    9.80%     1 S              -6.494  1.00     9 H
                                    9.80%     1 S              -6.494  1.00     5 H
                                   -5.78%     3 S              10.242  0.00     3 C
                                   -5.78%     3 S              10.242  0.00     2 C
                                   -2.53%     2 P:z             4.669  0.00     3 C
                                   -2.53%     2 P:z             4.669  0.00     2 C
                                   -1.59%     3 S              10.242  0.00     1 C
                                    1.24%     2 S             -13.774  2.00     3 C
                                    1.24%     2 S             -13.774  2.00     2 C
                                   -1.11%     2 S             -13.774  2.00     1 C
       0.637  0.00    19 A        -20.57%     2 P:x             4.669  0.00     1 C
                                   15.53%     2 S               2.470  0.00    10 H
                                   15.53%     2 S               2.470  0.00     6 H
                                   14.22%     2 S               2.470  0.00     9 H
                                   14.22%     2 S               2.470  0.00     7 H
                                   14.22%     2 S               2.470  0.00     8 H
                                   14.22%     2 S               2.470  0.00     5 H
                                   10.18%     1 S              -6.494  1.00     9 H
                                   10.18%     1 S              -6.494  1.00     7 H
                                   10.18%     1 S              -6.494  1.00     5 H
                                   10.18%     1 S              -6.494  1.00     8 H
                                   -7.47%     2 P:x             4.669  0.00     3 C
                                   -7.47%     2 P:x             4.669  0.00     2 C
                                   -7.01%     1 P:x            -5.296  0.67     1 C
                                    5.82%     1 S              -6.494  1.00    10 H
                                    5.82%     1 S              -6.494  1.00     6 H
                                   -1.99%     2 P:z             4.669  0.00     2 C
                                   -1.99%     2 P:z             4.669  0.00     3 C
                                    1.48%     3 P:x            55.182  0.00     1 C
                                   -1.04%     3 S              10.242  0.00     2 C
                                   -1.04%     3 S              10.242  0.00     3 C
                                   -1.01%     1 P:x            -5.296  0.67     3 C
                                   -1.01%     1 P:x            -5.296  0.67     2 C
       1.021  0.00    20 A        -26.21%     2 P:y             4.669  0.00     3 C
                                  -26.21%     2 P:y             4.669  0.00     2 C
                                   17.78%     2 S               2.470  0.00     9 H
                                   17.78%     2 S               2.470  0.00     5 H
[truncated: 28,867 more chars]
