# Supplementary material for: Spin Orbit Coupling in Orthogonal Charge Transfer States: (TD-)DFT of Pyrene - Dimethylaniline
Source: Preprints.org preprint supplement (doi:10.20944/preprints202112.0109.v2), 2021-12-16
Supplement: Supplementary file 3 [file supplementary › Supporting INFO-14-12-2021/Coordinate files/PyrDMA/CAMYLYP/S0/PyrDMA-geometry-CAMYLYP-S0-ACN.mol]

PyrDMA-geometry-S0
SCM ADF package: www.scm.com

 44 48  0  0  0  0  0  0  0  0999 V2000
    0.4128   -1.0880   -4.0539 C   0  0  0  0  0  0  0  0  0  0  0  0
    0.7300    0.0799   -3.3627 C   0  0  0  0  0  0  0  0  0  0  0  0
    0.5510    0.1211   -1.9573 C   0  0  0  0  0  0  0  0  0  0  0  0
    0.0522   -1.0180   -1.2809 C   0  0  0  0  0  0  0  0  0  0  0  0
   -0.2533   -2.1664   -2.0109 C   0  0  0  0  0  0  0  0  0  0  0  0
   -0.0737   -2.1981   -3.3829 C   0  0  0  0  0  0  0  0  0  0  0  0
    0.8689    1.3021   -1.2293 C   0  0  0  0  0  0  0  0  0  0  0  0
    0.6917    1.3439    0.1775 C   0  0  0  0  0  0  0  0  0  0  0  0
    0.1810    0.1713    0.8300 C   0  0  0  0  0  0  0  0  0  0  0  0
   -0.1229   -0.9461    0.1379 C   0  0  0  0  0  0  0  0  0  0  0  0
    1.2329    1.2458   -4.0293 C   0  0  0  0  0  0  0  0  0  0  0  0
    1.5302    2.3669   -3.3434 C   0  0  0  0  0  0  0  0  0  0  0  0
    1.3590    2.4379   -1.9213 C   0  0  0  0  0  0  0  0  0  0  0  0
    1.6556    3.5880   -1.1977 C   0  0  0  0  0  0  0  0  0  0  0  0
    1.4808    3.6196    0.1743 C   0  0  0  0  0  0  0  0  0  0  0  0
    1.0089    2.5200    0.8770 C   0  0  0  0  0  0  0  0  0  0  0  0
    0.8066    2.6298    2.3681 C   0  0  0  0  0  0  0  0  0  0  0  0
    2.2129    0.7283    5.2784 C   0  0  0  0  0  0  0  0  0  0  0  0
    1.3133    1.4201    4.4456 C   0  0  0  0  0  0  0  0  0  0  0  0
    1.6738    1.7579    3.1535 N   0  0  0  0  0  0  0  0  0  0  0  0
    1.8531    0.3401    6.5566 C   0  0  0  0  0  0  0  0  0  0  0  0
    0.5968    0.6288    7.0686 C   0  0  0  0  0  0  0  0  0  0  0  0
   -0.2926    1.3275    6.2675 C   0  0  0  0  0  0  0  0  0  0  0  0
    0.0515    1.7258    4.9865 C   0  0  0  0  0  0  0  0  0  0  0  0
    3.0841    1.7441    2.8115 C   0  0  0  0  0  0  0  0  0  0  0  0
    0.3221    0.3250    8.0683 H   0  0  0  0  0  0  0  0  0  0  0  0
   -1.2741    1.5821    6.6439 H   0  0  0  0  0  0  0  0  0  0  0  0
   -0.6726    2.2872    4.4203 H   0  0  0  0  0  0  0  0  0  0  0  0
    3.2004    0.4829    4.9241 H   0  0  0  0  0  0  0  0  0  0  0  0
    2.5735   -0.1951    7.1605 H   0  0  0  0  0  0  0  0  0  0  0  0
    3.4897    0.7343    2.8482 H   0  0  0  0  0  0  0  0  0  0  0  0
    3.2092    2.1081    1.7985 H   0  0  0  0  0  0  0  0  0  0  0  0
    3.6750    2.3764    3.4813 H   0  0  0  0  0  0  0  0  0  0  0  0
   -0.2241    2.3636    2.5834 H   0  0  0  0  0  0  0  0  0  0  0  0
    0.9292    3.6778    2.6634 H   0  0  0  0  0  0  0  0  0  0  0  0
    1.7202    4.5238    0.7176 H   0  0  0  0  0  0  0  0  0  0  0  0
    2.0276    4.4611   -1.7163 H   0  0  0  0  0  0  0  0  0  0  0  0
    1.9067    3.2415   -3.8566 H   0  0  0  0  0  0  0  0  0  0  0  0
    1.3671    1.2055   -5.1019 H   0  0  0  0  0  0  0  0  0  0  0  0
    0.5502   -1.1193   -5.1263 H   0  0  0  0  0  0  0  0  0  0  0  0
   -0.3151   -3.0953   -3.9353 H   0  0  0  0  0  0  0  0  0  0  0  0
   -0.6341   -3.0355   -1.4919 H   0  0  0  0  0  0  0  0  0  0  0  0
   -0.5074   -1.8171    0.6514 H   0  0  0  0  0  0  0  0  0  0  0  0
    0.0498    0.1866    1.9009 H   0  0  0  0  0  0  0  0  0  0  0  0
  3  7  1  0
  4 10  1  0
  2 11  1  0
 12 13  1  0
  8  9  1  0
 18 21  4  0
 14 15  4  0
  5  6  4  0
 23 24  4  0
  1  6  4  0
 22 23  4  0
 21 22  4  0
 15 16  4  0
 13 14  4  0
  1  2  4  0
  4  5  4  0
 16 17  1  0
  8 16  4  0
 19 24  4  0
 18 19  4  0
  3  4  4  0
  2  3  4  0
  7 13  4  0
  7  8  4  0
 19 20  1  0
 24 28  1  0
 18 29  1  0
  9 44  1  0
 22 26  1  0
  6 41  1  0
 14 37  1  0
  5 42  1  0
  1 40  1  0
 23 27  1  0
 11 39  1  0
 12 38  1  0
 21 30  1  0
 15 36  1  0
 10 43  1  0
 25 32  1  0
 17 34  1  0
 25 31  1  0
 25 33  1  0
 17 35  1  0
 20 25  1  0
 17 20  1  0
 11 12  2  0
  9 10  2  0
M  END
