# Supplementary material for: Spin Orbit Coupling in Orthogonal Charge Transfer States: (TD-)DFT of Pyrene - Dimethylaniline
Source: Preprints.org preprint supplement (doi:10.20944/preprints202112.0109.v2), 2021-12-16
Supplement: Supplementary file 3 [file supplementary › Supporting INFO-14-12-2021/Coordinate files/PyrDMA/CAMYLYP/S0/PyrDMA-geometry-CAMYLYP-S0-gas.mol]

PyrDMA-geometry-S0
SCM ADF package: www.scm.com

 44 48  0  0  0  0  0  0  0  0999 V2000
    0.4358   -1.0810   -4.1054 C   0  0  0  0  0  0  0  0  0  0  0  0
    0.7336    0.0797   -3.3955 C   0  0  0  0  0  0  0  0  0  0  0  0
    0.5649    0.0911   -1.9890 C   0  0  0  0  0  0  0  0  0  0  0  0
    0.0973   -1.0705   -1.3303 C   0  0  0  0  0  0  0  0  0  0  0  0
   -0.1890   -2.2103   -2.0797 C   0  0  0  0  0  0  0  0  0  0  0  0
   -0.0208   -2.2129   -3.4524 C   0  0  0  0  0  0  0  0  0  0  0  0
    0.8610    1.2652   -1.2414 C   0  0  0  0  0  0  0  0  0  0  0  0
    0.6916    1.2774    0.1667 C   0  0  0  0  0  0  0  0  0  0  0  0
    0.2190    0.0800    0.8020 C   0  0  0  0  0  0  0  0  0  0  0  0
   -0.0646   -1.0292    0.0904 C   0  0  0  0  0  0  0  0  0  0  0  0
    1.2054    1.2680   -4.0426 C   0  0  0  0  0  0  0  0  0  0  0  0
    1.4836    2.3816   -3.3387 C   0  0  0  0  0  0  0  0  0  0  0  0
    1.3204    2.4236   -1.9154 C   0  0  0  0  0  0  0  0  0  0  0  0
    1.5938    3.5666   -1.1730 C   0  0  0  0  0  0  0  0  0  0  0  0
    1.4209    3.5713    0.1986 C   0  0  0  0  0  0  0  0  0  0  0  0
    0.9782    2.4500    0.8844 C   0  0  0  0  0  0  0  0  0  0  0  0
    0.7727    2.5309    2.3776 C   0  0  0  0  0  0  0  0  0  0  0  0
    2.0426    0.4317    5.1886 C   0  0  0  0  0  0  0  0  0  0  0  0
    1.3204    1.3922    4.4674 C   0  0  0  0  0  0  0  0  0  0  0  0
    1.6731    1.6792    3.1389 N   0  0  0  0  0  0  0  0  0  0  0  0
    1.6935    0.0997    6.4815 C   0  0  0  0  0  0  0  0  0  0  0  0
    0.6084    0.7030    7.1031 C   0  0  0  0  0  0  0  0  0  0  0  0
   -0.1138    1.6495    6.4028 C   0  0  0  0  0  0  0  0  0  0  0  0
    0.2366    1.9999    5.1063 C   0  0  0  0  0  0  0  0  0  0  0  0
    3.0791    1.9289    2.8669 C   0  0  0  0  0  0  0  0  0  0  0  0
    0.3347    0.4362    8.1134 H   0  0  0  0  0  0  0  0  0  0  0  0
   -0.9589    2.1387    6.8672 H   0  0  0  0  0  0  0  0  0  0  0  0
   -0.3378    2.7628    4.6063 H   0  0  0  0  0  0  0  0  0  0  0  0
    2.8688   -0.0805    4.7194 H   0  0  0  0  0  0  0  0  0  0  0  0
    2.2681   -0.6512    7.0061 H   0  0  0  0  0  0  0  0  0  0  0  0
    3.7052    1.2124    3.3845 H   0  0  0  0  0  0  0  0  0  0  0  0
    3.2700    1.8331    1.8016 H   0  0  0  0  0  0  0  0  0  0  0  0
    3.3805    2.9370    3.1829 H   0  0  0  0  0  0  0  0  0  0  0  0
   -0.2466    2.2240    2.6058 H   0  0  0  0  0  0  0  0  0  0  0  0
    0.8629    3.5834    2.6820 H   0  0  0  0  0  0  0  0  0  0  0  0
    1.6358    4.4734    0.7559 H   0  0  0  0  0  0  0  0  0  0  0  0
    1.9428    4.4571   -1.6779 H   0  0  0  0  0  0  0  0  0  0  0  0
    1.8371    3.2733   -3.8388 H   0  0  0  0  0  0  0  0  0  0  0  0
    1.3325    1.2512   -5.1168 H   0  0  0  0  0  0  0  0  0  0  0  0
    0.5648   -1.0894   -5.1793 H   0  0  0  0  0  0  0  0  0  0  0  0
   -0.2476   -3.1047   -4.0195 H   0  0  0  0  0  0  0  0  0  0  0  0
   -0.5464   -3.0972   -1.5742 H   0  0  0  0  0  0  0  0  0  0  0  0
   -0.4203   -1.9195    0.5916 H   0  0  0  0  0  0  0  0  0  0  0  0
    0.1089    0.0702    1.8749 H   0  0  0  0  0  0  0  0  0  0  0  0
  3  7  1  0
  4 10  1  0
  2 11  1  0
 12 13  1  0
  8  9  1  0
 18 21  4  0
 22 23  4  0
 14 15  4  0
  5  6  4  0
  1  6  4  0
 15 16  4  0
 23 24  4  0
 21 22  4  0
 13 14  4  0
  1  2  4  0
  4  5  4  0
 19 24  4  0
 16 17  1  0
 18 19  4  0
  8 16  4  0
  3  4  4  0
  2  3  4  0
  7 13  4  0
  7  8  4  0
 24 28  1  0
  9 44  1  0
 18 29  1  0
 22 26  1  0
  6 41  1  0
 19 20  1  0
 23 27  1  0
 21 30  1  0
 14 37  1  0
  5 42  1  0
  1 40  1  0
 11 39  1  0
 12 38  1  0
 10 43  1  0
 15 36  1  0
 25 31  1  0
 25 32  1  0
 17 34  1  0
 25 33  1  0
 17 35  1  0
 20 25  1  0
 17 20  1  0
 11 12  2  0
  9 10  2  0
M  END
