# Supplementary material for: Spin Orbit Coupling in Orthogonal Charge Transfer States: (TD-)DFT of Pyrene - Dimethylaniline
Source: Preprints.org preprint supplement (doi:10.20944/preprints202112.0109.v2), 2021-12-16
Supplement: Supplementary file 3 [file supplementary › Supporting INFO-14-12-2021/Coordinate files/PyrDMA/CAMYLYP/S0/PyrDMA-geometry-CAMYLYP-S0-Hexane.mol]

PyrDMA-geometry-S0
SCM ADF package: www.scm.com

 44 48  0  0  0  0  0  0  0  0999 V2000
    0.4263   -1.0667   -4.0860 C   0  0  0  0  0  0  0  0  0  0  0  0
    0.7347    0.0960   -3.3833 C   0  0  0  0  0  0  0  0  0  0  0  0
    0.5605    0.1197   -1.9771 C   0  0  0  0  0  0  0  0  0  0  0  0
    0.0763   -1.0318   -1.3116 C   0  0  0  0  0  0  0  0  0  0  0  0
   -0.2199   -2.1744   -2.0536 C   0  0  0  0  0  0  0  0  0  0  0  0
   -0.0455   -2.1891   -3.4260 C   0  0  0  0  0  0  0  0  0  0  0  0
    0.8683    1.2955   -1.2373 C   0  0  0  0  0  0  0  0  0  0  0  0
    0.6945    1.3197    0.1701 C   0  0  0  0  0  0  0  0  0  0  0  0
    0.2028    0.1341    0.8122 C   0  0  0  0  0  0  0  0  0  0  0  0
   -0.0913   -0.9781    0.1082 C   0  0  0  0  0  0  0  0  0  0  0  0
    1.2231    1.2741   -4.0377 C   0  0  0  0  0  0  0  0  0  0  0  0
    1.5112    2.3903   -3.3407 C   0  0  0  0  0  0  0  0  0  0  0  0
    1.3436    2.4442   -1.9179 C   0  0  0  0  0  0  0  0  0  0  0  0
    1.6284    3.5894   -1.1824 C   0  0  0  0  0  0  0  0  0  0  0  0
    1.4549    3.6047    0.1898 C   0  0  0  0  0  0  0  0  0  0  0  0
    0.9967    2.4926    0.8813 C   0  0  0  0  0  0  0  0  0  0  0  0
    0.7870    2.5860    2.3719 C   0  0  0  0  0  0  0  0  0  0  0  0
    2.1947    0.7142    5.2963 C   0  0  0  0  0  0  0  0  0  0  0  0
    1.3075    1.4231    4.4676 C   0  0  0  0  0  0  0  0  0  0  0  0
    1.6536    1.7167    3.1579 N   0  0  0  0  0  0  0  0  0  0  0  0
    1.8464    0.3716    6.5900 C   0  0  0  0  0  0  0  0  0  0  0  0
    0.6149    0.7246    7.1195 C   0  0  0  0  0  0  0  0  0  0  0  0
   -0.2600    1.4428    6.3221 C   0  0  0  0  0  0  0  0  0  0  0  0
    0.0736    1.7968    5.0253 C   0  0  0  0  0  0  0  0  0  0  0  0
    3.0556    1.6567    2.7950 C   0  0  0  0  0  0  0  0  0  0  0  0
    0.3493    0.4546    8.1309 H   0  0  0  0  0  0  0  0  0  0  0  0
   -1.2221    1.7471    6.7110 H   0  0  0  0  0  0  0  0  0  0  0  0
   -0.6373    2.3756    4.4601 H   0  0  0  0  0  0  0  0  0  0  0  0
    3.1634    0.4184    4.9289 H   0  0  0  0  0  0  0  0  0  0  0  0
    2.5560   -0.1801    7.1913 H   0  0  0  0  0  0  0  0  0  0  0  0
    3.4297    0.6342    2.8327 H   0  0  0  0  0  0  0  0  0  0  0  0
    3.1782    2.0071    1.7768 H   0  0  0  0  0  0  0  0  0  0  0  0
    3.6762    2.2740    3.4519 H   0  0  0  0  0  0  0  0  0  0  0  0
   -0.2429    2.3050    2.5799 H   0  0  0  0  0  0  0  0  0  0  0  0
    0.8941    3.6339    2.6773 H   0  0  0  0  0  0  0  0  0  0  0  0
    1.6822    4.5065    0.7423 H   0  0  0  0  0  0  0  0  0  0  0  0
    1.9890    4.4722   -1.6923 H   0  0  0  0  0  0  0  0  0  0  0  0
    1.8774    3.2741   -3.8453 H   0  0  0  0  0  0  0  0  0  0  0  0
    1.3547    1.2470   -5.1109 H   0  0  0  0  0  0  0  0  0  0  0  0
    0.5597   -1.0846   -5.1591 H   0  0  0  0  0  0  0  0  0  0  0  0
   -0.2801   -3.0824   -3.9874 H   0  0  0  0  0  0  0  0  0  0  0  0
   -0.5890   -3.0535   -1.5432 H   0  0  0  0  0  0  0  0  0  0  0  0
   -0.4602   -1.8600    0.6144 H   0  0  0  0  0  0  0  0  0  0  0  0
    0.0820    0.1344    1.8844 H   0  0  0  0  0  0  0  0  0  0  0  0
  3  7  1  0
  4 10  1  0
  2 11  1  0
 12 13  1  0
  8  9  1  0
 18 21  4  0
 14 15  4  0
  5  6  4  0
 22 23  4  0
  1  6  4  0
 23 24  4  0
 21 22  4  0
 15 16  4  0
 13 14  4  0
  1  2  4  0
  4  5  4  0
 16 17  1  0
  8 16  4  0
 19 24  4  0
 18 19  4  0
  3  4  4  0
  2  3  4  0
  7 13  4  0
  7  8  4  0
 19 20  1  0
 24 28  1  0
 18 29  1  0
  9 44  1  0
 22 26  1  0
  6 41  1  0
 14 37  1  0
 23 27  1  0
  5 42  1  0
 21 30  1  0
  1 40  1  0
 11 39  1  0
 12 38  1  0
 10 43  1  0
 15 36  1  0
 25 32  1  0
 17 34  1  0
 25 31  1  0
 25 33  1  0
 17 35  1  0
 20 25  1  0
 17 20  1  0
 11 12  2  0
  9 10  2  0
M  END
