# Supplementary material for: Spin Orbit Coupling in Orthogonal Charge Transfer States: (TD-)DFT of Pyrene - Dimethylaniline
Source: Preprints.org preprint supplement (doi:10.20944/preprints202112.0109.v2), 2021-12-16
Supplement: Supplementary file 3 [file supplementary › Supporting INFO-14-12-2021/Coordinate files/PyrDMA/CAMYLYP/S1/PyrDMA-geometry-CAMYLYP-S1-ACN.mol]

PyrDMA-geometry-S1
SCM ADF package: www.scm.com

 44 48  0  0  0  0  0  0  0  0999 V2000
    0.4580   -1.4466   -3.4245 C   0  0  0  0  0  0  0  0  0  0  0  0
    0.8329   -0.1891   -2.8832 C   0  0  0  0  0  0  0  0  0  0  0  0
    0.5103    0.1092   -1.5297 C   0  0  0  0  0  0  0  0  0  0  0  0
   -0.1883   -0.8529   -0.7430 C   0  0  0  0  0  0  0  0  0  0  0  0
   -0.5413   -2.0947   -1.3327 C   0  0  0  0  0  0  0  0  0  0  0  0
   -0.2155   -2.3701   -2.6484 C   0  0  0  0  0  0  0  0  0  0  0  0
    0.8809    1.3607   -0.9648 C   0  0  0  0  0  0  0  0  0  0  0  0
    0.5588    1.6578    0.3973 C   0  0  0  0  0  0  0  0  0  0  0  0
   -0.1376    0.6907    1.1349 C   0  0  0  0  0  0  0  0  0  0  0  0
   -0.4990   -0.5297    0.5854 C   0  0  0  0  0  0  0  0  0  0  0  0
    1.5166    0.7774   -3.6439 C   0  0  0  0  0  0  0  0  0  0  0  0
    1.8693    1.9916   -3.0988 C   0  0  0  0  0  0  0  0  0  0  0  0
    1.5669    2.3115   -1.7667 C   0  0  0  0  0  0  0  0  0  0  0  0
    1.9227    3.5700   -1.1942 C   0  0  0  0  0  0  0  0  0  0  0  0
    1.6222    3.8444    0.1151 C   0  0  0  0  0  0  0  0  0  0  0  0
    0.9469    2.9396    0.9336 C   0  0  0  0  0  0  0  0  0  0  0  0
    0.7477    3.2722    2.3766 C   0  0  0  0  0  0  0  0  0  0  0  0
    2.2395    0.4962    4.4145 C   0  0  0  0  0  0  0  0  0  0  0  0
    1.3319    1.5152    4.0617 C   0  0  0  0  0  0  0  0  0  0  0  0
    1.7054    2.5061    3.1911 N   0  0  0  0  0  0  0  0  0  0  0  0
    1.8797   -0.4838    5.3156 C   0  0  0  0  0  0  0  0  0  0  0  0
    0.6163   -0.4895    5.8926 C   0  0  0  0  0  0  0  0  0  0  0  0
   -0.2871    0.5125    5.5561 C   0  0  0  0  0  0  0  0  0  0  0  0
    0.0535    1.4999    4.6581 C   0  0  0  0  0  0  0  0  0  0  0  0
    3.1104    2.7079    2.8868 C   0  0  0  0  0  0  0  0  0  0  0  0
    0.3397   -1.2600    6.5968 H   0  0  0  0  0  0  0  0  0  0  0  0
   -1.2677    0.5294    6.0090 H   0  0  0  0  0  0  0  0  0  0  0  0
   -0.6585    2.2796    4.4431 H   0  0  0  0  0  0  0  0  0  0  0  0
    3.2203    0.4701    3.9689 H   0  0  0  0  0  0  0  0  0  0  0  0
    2.5919   -1.2567    5.5654 H   0  0  0  0  0  0  0  0  0  0  0  0
    3.5009    1.9631    2.1918 H   0  0  0  0  0  0  0  0  0  0  0  0
    3.2277    3.6871    2.4356 H   0  0  0  0  0  0  0  0  0  0  0  0
    3.6895    2.6696    3.8051 H   0  0  0  0  0  0  0  0  0  0  0  0
   -0.2577    3.0527    2.7158 H   0  0  0  0  0  0  0  0  0  0  0  0
    0.9302    4.3321    2.5468 H   0  0  0  0  0  0  0  0  0  0  0  0
    1.9070    4.8021    0.5325 H   0  0  0  0  0  0  0  0  0  0  0  0
    2.4211    4.3056   -1.8096 H   0  0  0  0  0  0  0  0  0  0  0  0
    2.3909    2.7220   -3.7031 H   0  0  0  0  0  0  0  0  0  0  0  0
    1.7625    0.5544   -4.6735 H   0  0  0  0  0  0  0  0  0  0  0  0
    0.7086   -1.6708   -4.4518 H   0  0  0  0  0  0  0  0  0  0  0  0
   -0.4936   -3.3239   -3.0764 H   0  0  0  0  0  0  0  0  0  0  0  0
   -1.0702   -2.8251   -0.7363 H   0  0  0  0  0  0  0  0  0  0  0  0
   -1.0318   -1.2511    1.1902 H   0  0  0  0  0  0  0  0  0  0  0  0
   -0.4140    0.8893    2.1574 H   0  0  0  0  0  0  0  0  0  0  0  0
  2  3  1  0
  3  4  1  0
 13 14  1  0
  7  8  1  0
 14 15  2  0
 11 12  1  0
 23 24  4  0
 18 21  4  0
  1  6  2  0
  5  6  1  0
 16 17  1  0
  9 10  2  0
 21 22  4  0
 22 23  4  0
 15 16  1  0
  8  9  1  0
  4 10  1  0
 12 13  2  0
  2 11  2  0
 19 20  1  0
 18 19  4  0
 19 24  4  0
  4  5  2  0
  1  2  1  0
  7 13  1  0
  3  7  2  0
 24 28  1  0
 18 29  1  0
  9 44  1  0
 22 26  1  0
 23 27  1  0
 21 30  1  0
 14 37  1  0
  1 40  1  0
  5 42  1  0
  8 16  2  0
 10 43  1  0
 11 39  1  0
  6 41  1  0
 12 38  1  0
 15 36  1  0
 17 34  1  0
 25 32  1  0
 25 33  1  0
 17 35  1  0
 25 31  1  0
 20 25  1  0
 17 20  1  0
M  END
