# Supplementary material for: Spin Orbit Coupling in Orthogonal Charge Transfer States: (TD-)DFT of Pyrene - Dimethylaniline
Source: Preprints.org preprint supplement (doi:10.20944/preprints202112.0109.v2), 2021-12-16
Supplement: Supplementary file 3 [file supplementary › Supporting INFO-14-12-2021/Coordinate files/PyrDMA/CAMYLYP/S1/PyrDMA-geometry-CAMYLYP-S1-gas.mol]

PyrDMA-geometry-S1
SCM ADF package: www.scm.com

 44 48  0  0  0  0  0  0  0  0999 V2000
    0.6097   -1.1390   -3.9953 C   0  0  0  0  0  0  0  0  0  0  0  0
    0.8509    0.0636   -3.3026 C   0  0  0  0  0  0  0  0  0  0  0  0
    0.5975    0.1223   -1.9037 C   0  0  0  0  0  0  0  0  0  0  0  0
    0.1042   -1.0337   -1.2252 C   0  0  0  0  0  0  0  0  0  0  0  0
   -0.1206   -2.2110   -1.9652 C   0  0  0  0  0  0  0  0  0  0  0  0
    0.1319   -2.2475   -3.3240 C   0  0  0  0  0  0  0  0  0  0  0  0
    0.8371    1.3306   -1.1851 C   0  0  0  0  0  0  0  0  0  0  0  0
    0.5835    1.3843    0.2220 C   0  0  0  0  0  0  0  0  0  0  0  0
    0.0999    0.2246    0.8535 C   0  0  0  0  0  0  0  0  0  0  0  0
   -0.1356   -0.9441    0.1603 C   0  0  0  0  0  0  0  0  0  0  0  0
    1.3390    1.2253   -3.9488 C   0  0  0  0  0  0  0  0  0  0  0  0
    1.5667    2.3792   -3.2571 C   0  0  0  0  0  0  0  0  0  0  0  0
    1.3293    2.4726   -1.8708 C   0  0  0  0  0  0  0  0  0  0  0  0
    1.5655    3.6734   -1.1441 C   0  0  0  0  0  0  0  0  0  0  0  0
    1.3295    3.7185    0.2025 C   0  0  0  0  0  0  0  0  0  0  0  0
    0.8503    2.6117    0.9089 C   0  0  0  0  0  0  0  0  0  0  0  0
    0.6297    2.7019    2.3634 C   0  0  0  0  0  0  0  0  0  0  0  0
    2.1609    0.5578    5.1094 C   0  0  0  0  0  0  0  0  0  0  0  0
    1.3328    1.4998    4.4383 C   0  0  0  0  0  0  0  0  0  0  0  0
    1.6187    1.9036    3.1891 N   0  0  0  0  0  0  0  0  0  0  0  0
    1.8603    0.1528    6.3825 C   0  0  0  0  0  0  0  0  0  0  0  0
    0.7445    0.6635    7.0425 C   0  0  0  0  0  0  0  0  0  0  0  0
   -0.0769    1.5915    6.4053 C   0  0  0  0  0  0  0  0  0  0  0  0
    0.1954    2.0044    5.1284 C   0  0  0  0  0  0  0  0  0  0  0  0
    2.8839    1.5576    2.5665 C   0  0  0  0  0  0  0  0  0  0  0  0
    0.5157    0.3394    8.0466 H   0  0  0  0  0  0  0  0  0  0  0  0
   -0.9358    1.9924    6.9217 H   0  0  0  0  0  0  0  0  0  0  0  0
   -0.4397    2.7340    4.6585 H   0  0  0  0  0  0  0  0  0  0  0  0
    3.0112    0.1352    4.6027 H   0  0  0  0  0  0  0  0  0  0  0  0
    2.4899   -0.5743    6.8725 H   0  0  0  0  0  0  0  0  0  0  0  0
    2.8517    0.5283    2.2085 H   0  0  0  0  0  0  0  0  0  0  0  0
    3.0175    2.2001    1.7062 H   0  0  0  0  0  0  0  0  0  0  0  0
    3.6966    1.6846    3.2742 H   0  0  0  0  0  0  0  0  0  0  0  0
   -0.3488    2.3234    2.6530 H   0  0  0  0  0  0  0  0  0  0  0  0
    0.7181    3.7325    2.7111 H   0  0  0  0  0  0  0  0  0  0  0  0
    1.5146    4.6413    0.7409 H   0  0  0  0  0  0  0  0  0  0  0  0
    1.9247    4.5469   -1.6686 H   0  0  0  0  0  0  0  0  0  0  0  0
    1.9390    3.2541   -3.7744 H   0  0  0  0  0  0  0  0  0  0  0  0
    1.5295    1.1828   -5.0128 H   0  0  0  0  0  0  0  0  0  0  0  0
    0.8021   -1.1812   -5.0580 H   0  0  0  0  0  0  0  0  0  0  0  0
   -0.0491   -3.1629   -3.8723 H   0  0  0  0  0  0  0  0  0  0  0  0
   -0.4961   -3.0875   -1.4557 H   0  0  0  0  0  0  0  0  0  0  0  0
   -0.5162   -1.8129    0.6794 H   0  0  0  0  0  0  0  0  0  0  0  0
   -0.1152    0.2363    1.9124 H   0  0  0  0  0  0  0  0  0  0  0  0
  2  3  1  0
 13 14  1  0
  3  4  1  0
  7  8  1  0
 11 12  1  0
 16 17  1  0
 14 15  2  0
 23 24  4  0
 18 21  4  0
  9 10  2  0
 19 20  1  0
  1  6  2  0
  5  6  1  0
 21 22  4  0
 22 23  4  0
 15 16  1  0
  8  9  1  0
  1  2  1  0
  4  5  2  0
  4 10  1  0
 12 13  2  0
  2 11  2  0
  7 13  1  0
 18 19  4  0
 19 24  4  0
  3  7  2  0
  8 16  2  0
 24 28  1  0
 18 29  1  0
 23 27  1  0
 21 30  1  0
 22 26  1  0
 14 37  1  0
  9 44  1  0
  1 40  1  0
  5 42  1  0
 10 43  1  0
 11 39  1  0
 25 32  1  0
  6 41  1  0
 12 38  1  0
 15 36  1  0
 25 33  1  0
 17 34  1  0
 25 31  1  0
 17 35  1  0
 20 25  1  0
 17 20  1  0
M  END
