# Supplementary material for: Spin Orbit Coupling in Orthogonal Charge Transfer States: (TD-)DFT of Pyrene - Dimethylaniline
Source: Preprints.org preprint supplement (doi:10.20944/preprints202112.0109.v2), 2021-12-16
Supplement: Supplementary file 3 [file supplementary › Supporting INFO-14-12-2021/Coordinate files/PyrDMA/CAMYLYP/S1/PyrDMA-geometry-CAMYLYP-S1-Hexane.mol]

PyrDMA-geometry-S1
SCM ADF package: www.scm.com

 44 48  0  0  0  0  0  0  0  0999 V2000
    0.4167   -1.0933   -4.1327 C   0  0  0  0  0  0  0  0  0  0  0  0
    0.7211    0.0923   -3.4077 C   0  0  0  0  0  0  0  0  0  0  0  0
    0.5688    0.0971   -1.9920 C   0  0  0  0  0  0  0  0  0  0  0  0
    0.1138   -1.0782   -1.3291 C   0  0  0  0  0  0  0  0  0  0  0  0
   -0.1783   -2.2352   -2.1028 C   0  0  0  0  0  0  0  0  0  0  0  0
   -0.0240   -2.2270   -3.4770 C   0  0  0  0  0  0  0  0  0  0  0  0
    0.8649    1.2608   -1.2481 C   0  0  0  0  0  0  0  0  0  0  0  0
    0.7121    1.2645    0.1716 C   0  0  0  0  0  0  0  0  0  0  0  0
    0.2686    0.0899    0.7967 C   0  0  0  0  0  0  0  0  0  0  0  0
   -0.0255   -1.0510    0.0633 C   0  0  0  0  0  0  0  0  0  0  0  0
    1.1679    1.2599   -4.0439 C   0  0  0  0  0  0  0  0  0  0  0  0
    1.4543    2.4018   -3.3179 C   0  0  0  0  0  0  0  0  0  0  0  0
    1.3098    2.4314   -1.9236 C   0  0  0  0  0  0  0  0  0  0  0  0
    1.5877    3.5976   -1.1604 C   0  0  0  0  0  0  0  0  0  0  0  0
    1.4263    3.5945    0.2096 C   0  0  0  0  0  0  0  0  0  0  0  0
    1.0017    2.4696    0.9012 C   0  0  0  0  0  0  0  0  0  0  0  0
    0.7924    2.5425    2.3827 C   0  0  0  0  0  0  0  0  0  0  0  0
    2.0371    0.4425    5.2150 C   0  0  0  0  0  0  0  0  0  0  0  0
    1.3172    1.3936    4.4764 C   0  0  0  0  0  0  0  0  0  0  0  0
    1.6746    1.6670    3.1490 N   0  0  0  0  0  0  0  0  0  0  0  0
    1.6785    0.1233    6.5092 C   0  0  0  0  0  0  0  0  0  0  0  0
    0.5870    0.7305    7.1171 C   0  0  0  0  0  0  0  0  0  0  0  0
   -0.1323    1.6685    6.4003 C   0  0  0  0  0  0  0  0  0  0  0  0
    0.2264    2.0058    5.1024 C   0  0  0  0  0  0  0  0  0  0  0  0
    3.0859    1.8754    2.8648 C   0  0  0  0  0  0  0  0  0  0  0  0
    0.3066    0.4741    8.1284 H   0  0  0  0  0  0  0  0  0  0  0  0
   -0.9822    2.1610    6.8529 H   0  0  0  0  0  0  0  0  0  0  0  0
   -0.3475    2.7610    4.5902 H   0  0  0  0  0  0  0  0  0  0  0  0
    2.8701   -0.0716    4.7604 H   0  0  0  0  0  0  0  0  0  0  0  0
    2.2523   -0.6197    7.0462 H   0  0  0  0  0  0  0  0  0  0  0  0
    3.6962    1.1384    3.3721 H   0  0  0  0  0  0  0  0  0  0  0  0
    3.2602    1.7779    1.7964 H   0  0  0  0  0  0  0  0  0  0  0  0
    3.4196    2.8732    3.1787 H   0  0  0  0  0  0  0  0  0  0  0  0
   -0.2340    2.2406    2.6021 H   0  0  0  0  0  0  0  0  0  0  0  0
    0.8968    3.5890    2.6987 H   0  0  0  0  0  0  0  0  0  0  0  0
    1.6371    4.4975    0.7672 H   0  0  0  0  0  0  0  0  0  0  0  0
    1.9245    4.4901   -1.6694 H   0  0  0  0  0  0  0  0  0  0  0  0
    1.7941    3.2927   -3.8281 H   0  0  0  0  0  0  0  0  0  0  0  0
    1.2860    1.2609   -5.1188 H   0  0  0  0  0  0  0  0  0  0  0  0
    0.5357   -1.0929   -5.2073 H   0  0  0  0  0  0  0  0  0  0  0  0
   -0.2513   -3.1183   -4.0450 H   0  0  0  0  0  0  0  0  0  0  0  0
   -0.5245   -3.1260   -1.5969 H   0  0  0  0  0  0  0  0  0  0  0  0
   -0.3648   -1.9411    0.5751 H   0  0  0  0  0  0  0  0  0  0  0  0
    0.1706    0.0652    1.8703 H   0  0  0  0  0  0  0  0  0  0  0  0
  7 13  1  0
  2  3  1  0
  3  4  1  0
  8 16  1  0
 14 15  1  0
 18 21  4  0
  1  6  1  0
 22 23  4  0
  5  6  2  0
 11 12  2  0
 15 16  2  0
  9 10  1  0
 23 24  4  0
 16 17  1  0
 21 22  4  0
 19 24  4  0
  4 10  2  0
 12 13  1  0
  8  9  2  0
  2 11  1  0
 18 19  4  0
  3  7  2  0
 13 14  2  0
  4  5  1  0
  1  2  2  0
  7  8  1  0
 24 28  1  0
  9 44  1  0
 19 20  1  0
 18 29  1  0
 22 26  1  0
  6 41  1  0
  1 40  1  0
 14 37  1  0
  5 42  1  0
 11 39  1  0
 10 43  1  0
 12 38  1  0
 23 27  1  0
 21 30  1  0
 15 36  1  0
 25 31  1  0
 25 32  1  0
 17 34  1  0
 25 33  1  0
 17 35  1  0
 20 25  1  0
 17 20  1  0
M  END
