# Supplementary material for: Spin Orbit Coupling in Orthogonal Charge Transfer States: (TD-)DFT of Pyrene - Dimethylaniline
Source: Preprints.org preprint supplement (doi:10.20944/preprints202112.0109.v2), 2021-12-16
Supplement: Supplementary file 3 [file supplementary › Supporting INFO-14-12-2021/Coordinate files/PyrDMA/CAMYLYP/S2/PyrDMA-geometry-CAMYLYP-S2-ACN.mol]

PyrDMA-geometry-S2
SCM ADF package: www.scm.com

 44 48  0  0  0  0  0  0  0  0999 V2000
    0.4762   -1.1454   -3.9912 C   0  0  0  0  0  0  0  0  0  0  0  0
    0.7687    0.0590   -3.3072 C   0  0  0  0  0  0  0  0  0  0  0  0
    0.5776    0.1211   -1.8986 C   0  0  0  0  0  0  0  0  0  0  0  0
    0.0976   -1.0279   -1.1959 C   0  0  0  0  0  0  0  0  0  0  0  0
   -0.1793   -2.2084   -1.9291 C   0  0  0  0  0  0  0  0  0  0  0  0
    0.0121   -2.2490   -3.2984 C   0  0  0  0  0  0  0  0  0  0  0  0
    0.8672    1.3230   -1.1911 C   0  0  0  0  0  0  0  0  0  0  0  0
    0.6721    1.3819    0.2240 C   0  0  0  0  0  0  0  0  0  0  0  0
    0.2013    0.2330    0.8813 C   0  0  0  0  0  0  0  0  0  0  0  0
   -0.0746   -0.9398    0.1964 C   0  0  0  0  0  0  0  0  0  0  0  0
    1.2464    1.2101   -3.9756 C   0  0  0  0  0  0  0  0  0  0  0  0
    1.5224    2.3652   -3.2911 C   0  0  0  0  0  0  0  0  0  0  0  0
    1.3452    2.4593   -1.8963 C   0  0  0  0  0  0  0  0  0  0  0  0
    1.6280    3.6533   -1.1722 C   0  0  0  0  0  0  0  0  0  0  0  0
    1.4397    3.6999    0.1878 C   0  0  0  0  0  0  0  0  0  0  0  0
    0.9795    2.6009    0.9087 C   0  0  0  0  0  0  0  0  0  0  0  0
    0.7504    2.7002    2.3771 C   0  0  0  0  0  0  0  0  0  0  0  0
    2.1043    0.4724    5.1006 C   0  0  0  0  0  0  0  0  0  0  0  0
    1.3364    1.4530    4.4356 C   0  0  0  0  0  0  0  0  0  0  0  0
    1.6886    1.8950    3.1873 N   0  0  0  0  0  0  0  0  0  0  0  0
    1.7110   -0.0010    6.3299 C   0  0  0  0  0  0  0  0  0  0  0  0
    0.5609    0.4843    6.9440 C   0  0  0  0  0  0  0  0  0  0  0  0
   -0.1960    1.4584    6.3069 C   0  0  0  0  0  0  0  0  0  0  0  0
    0.1749    1.9403    5.0705 C   0  0  0  0  0  0  0  0  0  0  0  0
    3.0452    1.8414    2.6958 C   0  0  0  0  0  0  0  0  0  0  0  0
    0.2637    0.1113    7.9126 H   0  0  0  0  0  0  0  0  0  0  0  0
   -1.0778    1.8574    6.7851 H   0  0  0  0  0  0  0  0  0  0  0  0
   -0.4023    2.7287    4.6197 H   0  0  0  0  0  0  0  0  0  0  0  0
    2.9799    0.0554    4.6338 H   0  0  0  0  0  0  0  0  0  0  0  0
    2.3020   -0.7634    6.8147 H   0  0  0  0  0  0  0  0  0  0  0  0
    3.6884    1.3014    3.3729 H   0  0  0  0  0  0  0  0  0  0  0  0
    3.0549    1.3824    1.7082 H   0  0  0  0  0  0  0  0  0  0  0  0
    3.4248    2.8587    2.5885 H   0  0  0  0  0  0  0  0  0  0  0  0
   -0.2521    2.3670    2.6420 H   0  0  0  0  0  0  0  0  0  0  0  0
    0.8550    3.7424    2.6908 H   0  0  0  0  0  0  0  0  0  0  0  0
    1.6595    4.6157    0.7232 H   0  0  0  0  0  0  0  0  0  0  0  0
    1.9961    4.5196   -1.7043 H   0  0  0  0  0  0  0  0  0  0  0  0
    1.8865    3.2334   -3.8259 H   0  0  0  0  0  0  0  0  0  0  0  0
    1.3929    1.1664   -5.0469 H   0  0  0  0  0  0  0  0  0  0  0  0
    0.6174   -1.1900   -5.0624 H   0  0  0  0  0  0  0  0  0  0  0  0
   -0.2064   -3.1616   -3.8377 H   0  0  0  0  0  0  0  0  0  0  0  0
   -0.5430   -3.0797   -1.4017 H   0  0  0  0  0  0  0  0  0  0  0  0
   -0.4328   -1.8053    0.7374 H   0  0  0  0  0  0  0  0  0  0  0  0
    0.0354    0.2558    1.9482 H   0  0  0  0  0  0  0  0  0  0  0  0
  2  3  1  0
 13 14  1  0
  7  8  1  0
  3  4  1  0
 11 12  1  0
 14 15  2  0
 18 21  4  0
 23 24  4  0
 16 17  1  0
  5  6  1  0
  1  6  2  0
  9 10  2  0
 22 23  4  0
 21 22  4  0
 15 16  1  0
  8  9  1  0
  4 10  1  0
 19 20  1  0
 12 13  2  0
 19 24  4  0
 18 19  4  0
  2 11  2  0
  1  2  1  0
  4  5  2  0
  7 13  1  0
  3  7  2  0
  8 16  2  0
 24 28  1  0
 18 29  1  0
 25 31  1  0
 23 27  1  0
 21 30  1  0
 22 26  1  0
  9 44  1  0
 14 37  1  0
  1 40  1  0
  5 42  1  0
 10 43  1  0
 11 39  1  0
  6 41  1  0
 12 38  1  0
 15 36  1  0
 17 34  1  0
 25 32  1  0
 25 33  1  0
 17 35  1  0
 20 25  1  0
 17 20  1  0
M  END
