# Supplementary material for: Spin Orbit Coupling in Orthogonal Charge Transfer States: (TD-)DFT of Pyrene - Dimethylaniline
Source: Preprints.org preprint supplement (doi:10.20944/preprints202112.0109.v2), 2021-12-16
Supplement: Supplementary file 3 [file supplementary › Supporting INFO-14-12-2021/Coordinate files/PyrDMA/CAMYLYP/S2/PyrDMA-geometry-CAMYLYP-S2-gas.mol]

PyrDMA-geometry-S2
SCM ADF package: www.scm.com

 44 48  0  0  0  0  0  0  0  0999 V2000
    0.4332   -1.0410   -4.1616 C   0  0  0  0  0  0  0  0  0  0  0  0
    0.7342    0.1313   -3.4270 C   0  0  0  0  0  0  0  0  0  0  0  0
    0.5714    0.1253   -2.0103 C   0  0  0  0  0  0  0  0  0  0  0  0
    0.1070   -1.0578   -1.3615 C   0  0  0  0  0  0  0  0  0  0  0  0
   -0.1806   -2.2025   -2.1463 C   0  0  0  0  0  0  0  0  0  0  0  0
   -0.0157   -2.1821   -3.5198 C   0  0  0  0  0  0  0  0  0  0  0  0
    0.8658    1.2778   -1.2560 C   0  0  0  0  0  0  0  0  0  0  0  0
    0.7011    1.2703    0.1641 C   0  0  0  0  0  0  0  0  0  0  0  0
    0.2458    0.0894    0.7771 C   0  0  0  0  0  0  0  0  0  0  0  0
   -0.0429   -1.0424    0.0337 C   0  0  0  0  0  0  0  0  0  0  0  0
    1.1912    1.3078   -4.0496 C   0  0  0  0  0  0  0  0  0  0  0  0
    1.4763    2.4379   -3.3128 C   0  0  0  0  0  0  0  0  0  0  0  0
    1.3225    2.4561   -1.9156 C   0  0  0  0  0  0  0  0  0  0  0  0
    1.6021    3.6092   -1.1414 C   0  0  0  0  0  0  0  0  0  0  0  0
    1.4346    3.5925    0.2279 C   0  0  0  0  0  0  0  0  0  0  0  0
    0.9963    2.4595    0.9046 C   0  0  0  0  0  0  0  0  0  0  0  0
    0.7692    2.5191    2.3827 C   0  0  0  0  0  0  0  0  0  0  0  0
    2.1840    0.7293    5.3547 C   0  0  0  0  0  0  0  0  0  0  0  0
    1.3000    1.4178    4.5071 C   0  0  0  0  0  0  0  0  0  0  0  0
    1.6223    1.6302    3.1734 N   0  0  0  0  0  0  0  0  0  0  0  0
    1.8530    0.4680    6.6709 C   0  0  0  0  0  0  0  0  0  0  0  0
    0.6440    0.8862    7.2033 C   0  0  0  0  0  0  0  0  0  0  0  0
   -0.2269    1.5853    6.3856 C   0  0  0  0  0  0  0  0  0  0  0  0
    0.0896    1.8577    5.0660 C   0  0  0  0  0  0  0  0  0  0  0  0
    3.0116    1.5110    2.7807 C   0  0  0  0  0  0  0  0  0  0  0  0
    0.3922    0.6808    8.2332 H   0  0  0  0  0  0  0  0  0  0  0  0
   -1.1703    1.9395    6.7779 H   0  0  0  0  0  0  0  0  0  0  0  0
   -0.6138    2.4265    4.4813 H   0  0  0  0  0  0  0  0  0  0  0  0
    3.1357    0.3868    4.9837 H   0  0  0  0  0  0  0  0  0  0  0  0
    2.5582   -0.0710    7.2889 H   0  0  0  0  0  0  0  0  0  0  0  0
    3.3608    0.4853    2.8909 H   0  0  0  0  0  0  0  0  0  0  0  0
    3.1080    1.7783    1.7338 H   0  0  0  0  0  0  0  0  0  0  0  0
    3.6679    2.1626    3.3678 H   0  0  0  0  0  0  0  0  0  0  0  0
   -0.2647    2.2234    2.5723 H   0  0  0  0  0  0  0  0  0  0  0  0
    0.8686    3.5597    2.7151 H   0  0  0  0  0  0  0  0  0  0  0  0
    1.6480    4.4868    0.7981 H   0  0  0  0  0  0  0  0  0  0  0  0
    1.9476    4.5048   -1.6386 H   0  0  0  0  0  0  0  0  0  0  0  0
    1.8234    3.3327   -3.8112 H   0  0  0  0  0  0  0  0  0  0  0  0
    1.3163    1.3176   -5.1237 H   0  0  0  0  0  0  0  0  0  0  0  0
    0.5593   -1.0314   -5.2355 H   0  0  0  0  0  0  0  0  0  0  0  0
   -0.2408   -3.0672   -4.0978 H   0  0  0  0  0  0  0  0  0  0  0  0
   -0.5329   -3.0977   -1.6524 H   0  0  0  0  0  0  0  0  0  0  0  0
   -0.3887   -1.9363    0.5341 H   0  0  0  0  0  0  0  0  0  0  0  0
    0.1342    0.0592    1.8496 H   0  0  0  0  0  0  0  0  0  0  0  0
  7 13  1  0
  2  3  1  0
  3  4  1  0
  8 16  1  0
 11 12  2  0
 14 15  1  0
 18 21  4  0
  5  6  2  0
  1  6  1  0
 22 23  4  0
 23 24  4  0
  9 10  1  0
 21 22  4  0
 16 17  1  0
 15 16  2  0
  4 10  2  0
 19 24  4  0
 18 19  4  0
 12 13  1  0
  8  9  2  0
  2 11  1  0
  3  7  2  0
  1  2  2  0
 13 14  2  0
  4  5  1  0
 19 20  1  0
  7  8  1  0
 24 28  1  0
 18 29  1  0
  9 44  1  0
 22 26  1  0
  6 41  1  0
 14 37  1  0
 10 43  1  0
  1 40  1  0
 11 39  1  0
  5 42  1  0
 23 27  1  0
 12 38  1  0
 21 30  1  0
 15 36  1  0
 25 32  1  0
 25 31  1  0
 17 34  1  0
 25 33  1  0
 17 35  1  0
 20 25  1  0
 17 20  1  0
M  END
