# Supplementary material for: Spin Orbit Coupling in Orthogonal Charge Transfer States: (TD-)DFT of Pyrene - Dimethylaniline
Source: Preprints.org preprint supplement (doi:10.20944/preprints202112.0109.v2), 2021-12-16
Supplement: Supplementary file 3 [file supplementary › Supporting INFO-14-12-2021/Coordinate files/PyrDMA/CAMYLYP/T1/PyrDMA-geometry-CAMYLYP-T1-ACN.mol]

PyrDMA-geometry-T1
SCM ADF package: www.scm.com

 44 48  0  0  0  0  0  0  0  0999 V2000
    0.3863   -1.1052   -4.1077 C   0  0  0  0  0  0  0  0  0  0  0  0
    0.7185    0.0930   -3.3895 C   0  0  0  0  0  0  0  0  0  0  0  0
    0.5549    0.1166   -1.9770 C   0  0  0  0  0  0  0  0  0  0  0  0
    0.0661   -1.0352   -1.3033 C   0  0  0  0  0  0  0  0  0  0  0  0
   -0.2512   -2.2069   -2.0684 C   0  0  0  0  0  0  0  0  0  0  0  0
   -0.0854   -2.2166   -3.4396 C   0  0  0  0  0  0  0  0  0  0  0  0
    0.8756    1.2868   -1.2427 C   0  0  0  0  0  0  0  0  0  0  0  0
    0.7115    1.3102    0.1720 C   0  0  0  0  0  0  0  0  0  0  0  0
    0.2323    0.1664    0.8045 C   0  0  0  0  0  0  0  0  0  0  0  0
   -0.0869   -0.9875    0.0787 C   0  0  0  0  0  0  0  0  0  0  0  0
    1.1948    1.2317   -4.0341 C   0  0  0  0  0  0  0  0  0  0  0  0
    1.5064    2.3879   -3.3120 C   0  0  0  0  0  0  0  0  0  0  0  0
    1.3533    2.4350   -1.9300 C   0  0  0  0  0  0  0  0  0  0  0  0
    1.6577    3.6155   -1.1705 C   0  0  0  0  0  0  0  0  0  0  0  0
    1.4904    3.6289    0.1962 C   0  0  0  0  0  0  0  0  0  0  0  0
    1.0316    2.5262    0.8975 C   0  0  0  0  0  0  0  0  0  0  0  0
    0.8135    2.6166    2.3781 C   0  0  0  0  0  0  0  0  0  0  0  0
    2.2056    0.7380    5.3099 C   0  0  0  0  0  0  0  0  0  0  0  0
    1.3124    1.4260    4.4676 C   0  0  0  0  0  0  0  0  0  0  0  0
    1.6750    1.7405    3.1704 N   0  0  0  0  0  0  0  0  0  0  0  0
    1.8427    0.3731    6.5942 C   0  0  0  0  0  0  0  0  0  0  0  0
    0.5898    0.6827    7.1021 C   0  0  0  0  0  0  0  0  0  0  0  0
   -0.2929    1.3789    6.2913 C   0  0  0  0  0  0  0  0  0  0  0  0
    0.0542    1.7536    5.0040 C   0  0  0  0  0  0  0  0  0  0  0  0
    3.0854    1.7183    2.8298 C   0  0  0  0  0  0  0  0  0  0  0  0
    0.3123    0.3973    8.1064 H   0  0  0  0  0  0  0  0  0  0  0  0
   -1.2719    1.6486    6.6639 H   0  0  0  0  0  0  0  0  0  0  0  0
   -0.6649    2.3116    4.4281 H   0  0  0  0  0  0  0  0  0  0  0  0
    3.1900    0.4768    4.9578 H   0  0  0  0  0  0  0  0  0  0  0  0
    2.5578   -0.1606    7.2055 H   0  0  0  0  0  0  0  0  0  0  0  0
    3.4854    0.7063    2.8664 H   0  0  0  0  0  0  0  0  0  0  0  0
    3.2084    2.0831    1.8163 H   0  0  0  0  0  0  0  0  0  0  0  0
    3.6801    2.3482    3.4984 H   0  0  0  0  0  0  0  0  0  0  0  0
   -0.2175    2.3340    2.5806 H   0  0  0  0  0  0  0  0  0  0  0  0
    0.9242    3.6615    2.6879 H   0  0  0  0  0  0  0  0  0  0  0  0
    1.7222    4.5317    0.7454 H   0  0  0  0  0  0  0  0  0  0  0  0
    2.0183    4.4903   -1.6881 H   0  0  0  0  0  0  0  0  0  0  0  0
    1.8707    3.2631   -3.8311 H   0  0  0  0  0  0  0  0  0  0  0  0
    1.3212    1.2172   -5.1073 H   0  0  0  0  0  0  0  0  0  0  0  0
    0.5133   -1.1195   -5.1787 H   0  0  0  0  0  0  0  0  0  0  0  0
   -0.3301   -3.1091   -3.9984 H   0  0  0  0  0  0  0  0  0  0  0  0
   -0.6214   -3.0789   -1.5528 H   0  0  0  0  0  0  0  0  0  0  0  0
   -0.4565   -1.8597    0.5989 H   0  0  0  0  0  0  0  0  0  0  0  0
    0.1149    0.1598    1.8766 H   0  0  0  0  0  0  0  0  0  0  0  0
  2  3  1  0
  7  8  1  0
  4  5  1  0
 13 14  1  0
 14 15  2  0
  1  6  1  0
  5  6  2  0
 18 21  4  0
 23 24  4  0
 15 16  1  0
 22 23  4  0
 21 22  4  0
 16 17  1  0
 12 13  1  0
  4 10  1  0
  8  9  1  0
  2 11  1  0
 11 12  2  0
  9 10  2  0
 19 24  4  0
 18 19  4  0
  3  7  1  0
 19 20  1  0
  7 13  2  0
  3  4  2  0
  1  2  2  0
 24 28  1  0
 18 29  1  0
 14 37  1  0
  9 44  1  0
  5 42  1  0
  1 40  1  0
 22 26  1  0
 10 43  1  0
 11 39  1  0
 12 38  1  0
  6 41  1  0
 23 27  1  0
 21 30  1  0
 15 36  1  0
 25 32  1  0
 17 34  1  0
  8 16  2  0
 25 31  1  0
 25 33  1  0
 17 35  1  0
 20 25  1  0
 17 20  1  0
M  END
