# Supplementary material for: Spin Orbit Coupling in Orthogonal Charge Transfer States: (TD-)DFT of Pyrene - Dimethylaniline
Source: Preprints.org preprint supplement (doi:10.20944/preprints202112.0109.v2), 2021-12-16
Supplement: Supplementary file 3 [file supplementary › Supporting INFO-14-12-2021/Coordinate files/PyrDMA/CAMYLYP/T1/PyrDMA-geometry-CAMYLYP-T1-gas.mol]

PyrDMA-geometry-T1
SCM ADF package: www.scm.com

 44 48  0  0  0  0  0  0  0  0999 V2000
    0.4201   -1.1017   -4.1380 C   0  0  0  0  0  0  0  0  0  0  0  0
    0.7241    0.0941   -3.4101 C   0  0  0  0  0  0  0  0  0  0  0  0
    0.5691    0.0954   -1.9968 C   0  0  0  0  0  0  0  0  0  0  0  0
    0.1176   -1.0775   -1.3346 C   0  0  0  0  0  0  0  0  0  0  0  0
   -0.1728   -2.2440   -2.1118 C   0  0  0  0  0  0  0  0  0  0  0  0
   -0.0176   -2.2346   -3.4839 C   0  0  0  0  0  0  0  0  0  0  0  0
    0.8620    1.2626   -1.2504 C   0  0  0  0  0  0  0  0  0  0  0  0
    0.7073    1.2631    0.1655 C   0  0  0  0  0  0  0  0  0  0  0  0
    0.2680    0.0974    0.7863 C   0  0  0  0  0  0  0  0  0  0  0  0
   -0.0243   -1.0513    0.0482 C   0  0  0  0  0  0  0  0  0  0  0  0
    1.1654    1.2528   -4.0420 C   0  0  0  0  0  0  0  0  0  0  0  0
    1.4508    2.4040   -3.3091 C   0  0  0  0  0  0  0  0  0  0  0  0
    1.3054    2.4307   -1.9263 C   0  0  0  0  0  0  0  0  0  0  0  0
    1.5835    3.6041   -1.1537 C   0  0  0  0  0  0  0  0  0  0  0  0
    1.4230    3.5988    0.2141 C   0  0  0  0  0  0  0  0  0  0  0  0
    0.9997    2.4750    0.9036 C   0  0  0  0  0  0  0  0  0  0  0  0
    0.7894    2.5414    2.3881 C   0  0  0  0  0  0  0  0  0  0  0  0
    2.0302    0.4378    5.2149 C   0  0  0  0  0  0  0  0  0  0  0  0
    1.3167    1.3953    4.4804 C   0  0  0  0  0  0  0  0  0  0  0  0
    1.6715    1.6676    3.1510 N   0  0  0  0  0  0  0  0  0  0  0  0
    1.6746    0.1213    6.5101 C   0  0  0  0  0  0  0  0  0  0  0  0
    0.5916    0.7374    7.1225 C   0  0  0  0  0  0  0  0  0  0  0  0
   -0.1220    1.6815    6.4096 C   0  0  0  0  0  0  0  0  0  0  0  0
    0.2344    2.0161    5.1109 C   0  0  0  0  0  0  0  0  0  0  0  0
    3.0818    1.8691    2.8636 C   0  0  0  0  0  0  0  0  0  0  0  0
    0.3132    0.4830    8.1345 H   0  0  0  0  0  0  0  0  0  0  0  0
   -0.9656    2.1809    6.8657 H   0  0  0  0  0  0  0  0  0  0  0  0
   -0.3352    2.7760    4.6015 H   0  0  0  0  0  0  0  0  0  0  0  0
    2.8556   -0.0847    4.7566 H   0  0  0  0  0  0  0  0  0  0  0  0
    2.2434   -0.6275    7.0437 H   0  0  0  0  0  0  0  0  0  0  0  0
    3.6891    1.1318    3.3738 H   0  0  0  0  0  0  0  0  0  0  0  0
    3.2566    1.7655    1.7962 H   0  0  0  0  0  0  0  0  0  0  0  0
    3.4218    2.8662    3.1742 H   0  0  0  0  0  0  0  0  0  0  0  0
   -0.2362    2.2404    2.6058 H   0  0  0  0  0  0  0  0  0  0  0  0
    0.8911    3.5884    2.7065 H   0  0  0  0  0  0  0  0  0  0  0  0
    1.6338    4.5013    0.7727 H   0  0  0  0  0  0  0  0  0  0  0  0
    1.9187    4.4963   -1.6626 H   0  0  0  0  0  0  0  0  0  0  0  0
    1.7894    3.2944   -3.8208 H   0  0  0  0  0  0  0  0  0  0  0  0
    1.2854    1.2572   -5.1165 H   0  0  0  0  0  0  0  0  0  0  0  0
    0.5400   -1.0992   -5.2118 H   0  0  0  0  0  0  0  0  0  0  0  0
   -0.2420   -3.1262   -4.0523 H   0  0  0  0  0  0  0  0  0  0  0  0
   -0.5161   -3.1336   -1.6037 H   0  0  0  0  0  0  0  0  0  0  0  0
   -0.3632   -1.9401    0.5621 H   0  0  0  0  0  0  0  0  0  0  0  0
    0.1687    0.0698    1.8596 H   0  0  0  0  0  0  0  0  0  0  0  0
  2  3  1  0
  7  8  1  0
  4  5  1  0
 13 14  1  0
 14 15  2  0
  1  6  1  0
 18 21  4  0
  5  6  2  0
 22 23  4  0
 15 16  1  0
 23 24  4  0
 21 22  4  0
  4 10  1  0
 12 13  1  0
 16 17  1  0
  2 11  1  0
  8  9  1  0
 11 12  2  0
  9 10  2  0
 19 24  4  0
 18 19  4  0
  3  7  1  0
  7 13  2  0
  3  4  2  0
  1  2  2  0
 24 28  1  0
  9 44  1  0
 18 29  1  0
 22 26  1  0
 19 20  1  0
 14 37  1  0
  5 42  1  0
  1 40  1  0
  6 41  1  0
 11 39  1  0
 23 27  1  0
 10 43  1  0
 21 30  1  0
 12 38  1  0
 15 36  1  0
 25 31  1  0
  8 16  2  0
 25 32  1  0
 17 34  1  0
 25 33  1  0
 17 35  1  0
 20 25  1  0
 17 20  1  0
M  END
