# Supplementary material for: Spin Orbit Coupling in Orthogonal Charge Transfer States: (TD-)DFT of Pyrene - Dimethylaniline
Source: Preprints.org preprint supplement (doi:10.20944/preprints202112.0109.v2), 2021-12-16
Supplement: Supplementary file 3 [file supplementary › Supporting INFO-14-12-2021/Coordinate files/PyrDMA/CAMYLYP/T1/PyrDMA-geometry-CAMYLYP-T1-Hexane.mol]

PyrDMA-geometry-T1
SCM ADF package: www.scm.com

 44 48  0  0  0  0  0  0  0  0999 V2000
    0.4124   -1.0891   -4.1236 C   0  0  0  0  0  0  0  0  0  0  0  0
    0.7279    0.1081   -3.4000 C   0  0  0  0  0  0  0  0  0  0  0  0
    0.5657    0.1199   -1.9874 C   0  0  0  0  0  0  0  0  0  0  0  0
    0.0951   -1.0429   -1.3204 C   0  0  0  0  0  0  0  0  0  0  0  0
   -0.2063   -2.2119   -2.0924 C   0  0  0  0  0  0  0  0  0  0  0  0
   -0.0428   -2.2118   -3.4637 C   0  0  0  0  0  0  0  0  0  0  0  0
    0.8705    1.2886   -1.2462 C   0  0  0  0  0  0  0  0  0  0  0  0
    0.7085    1.2996    0.1685 C   0  0  0  0  0  0  0  0  0  0  0  0
    0.2487    0.1445    0.7944 C   0  0  0  0  0  0  0  0  0  0  0  0
   -0.0550   -1.0066    0.0620 C   0  0  0  0  0  0  0  0  0  0  0  0
    1.1875    1.2573   -4.0371 C   0  0  0  0  0  0  0  0  0  0  0  0
    1.4845    2.4107   -3.3087 C   0  0  0  0  0  0  0  0  0  0  0  0
    1.3327    2.4470   -1.9265 C   0  0  0  0  0  0  0  0  0  0  0  0
    1.6237    3.6233   -1.1593 C   0  0  0  0  0  0  0  0  0  0  0  0
    1.4579    3.6267    0.2079 C   0  0  0  0  0  0  0  0  0  0  0  0
    1.0142    2.5133    0.9016 C   0  0  0  0  0  0  0  0  0  0  0  0
    0.7948    2.5917    2.3827 C   0  0  0  0  0  0  0  0  0  0  0  0
    2.1824    0.7098    5.3125 C   0  0  0  0  0  0  0  0  0  0  0  0
    1.3045    1.4283    4.4821 C   0  0  0  0  0  0  0  0  0  0  0  0
    1.6527    1.7128    3.1720 N   0  0  0  0  0  0  0  0  0  0  0  0
    1.8317    0.3802    6.6088 C   0  0  0  0  0  0  0  0  0  0  0  0
    0.6073    0.7562    7.1388 C   0  0  0  0  0  0  0  0  0  0  0  0
   -0.2589    1.4826    6.3388 C   0  0  0  0  0  0  0  0  0  0  0  0
    0.0766    1.8227    5.0393 C   0  0  0  0  0  0  0  0  0  0  0  0
    3.0503    1.6233    2.7999 C   0  0  0  0  0  0  0  0  0  0  0  0
    0.3396    0.4976    8.1526 H   0  0  0  0  0  0  0  0  0  0  0  0
   -1.2146    1.8042    6.7298 H   0  0  0  0  0  0  0  0  0  0  0  0
   -0.6257    2.4085    4.4703 H   0  0  0  0  0  0  0  0  0  0  0  0
    3.1446    0.3968    4.9419 H   0  0  0  0  0  0  0  0  0  0  0  0
    2.5333   -0.1793    7.2125 H   0  0  0  0  0  0  0  0  0  0  0  0
    3.4031    0.5933    2.8339 H   0  0  0  0  0  0  0  0  0  0  0  0
    3.1696    1.9751    1.7813 H   0  0  0  0  0  0  0  0  0  0  0  0
    3.6894    2.2269    3.4521 H   0  0  0  0  0  0  0  0  0  0  0  0
   -0.2374    2.3041    2.5802 H   0  0  0  0  0  0  0  0  0  0  0  0
    0.8982    3.6361    2.7002 H   0  0  0  0  0  0  0  0  0  0  0  0
    1.6798    4.5286    0.7629 H   0  0  0  0  0  0  0  0  0  0  0  0
    1.9738    4.5070   -1.6710 H   0  0  0  0  0  0  0  0  0  0  0  0
    1.8374    3.2940   -3.8225 H   0  0  0  0  0  0  0  0  0  0  0  0
    1.3127    1.2521   -5.1107 H   0  0  0  0  0  0  0  0  0  0  0  0
    0.5382   -1.0952   -5.1958 H   0  0  0  0  0  0  0  0  0  0  0  0
   -0.2754   -3.1040   -4.0279 H   0  0  0  0  0  0  0  0  0  0  0  0
   -0.5635   -3.0934   -1.5816 H   0  0  0  0  0  0  0  0  0  0  0  0
   -0.4098   -1.8878    0.5777 H   0  0  0  0  0  0  0  0  0  0  0  0
    0.1382    0.1274    1.8673 H   0  0  0  0  0  0  0  0  0  0  0  0
  2  3  1  0
  7  8  1  0
  4  5  1  0
 13 14  1  0
 14 15  2  0
  1  6  1  0
  5  6  2  0
 18 21  4  0
 23 24  4  0
 15 16  1  0
 22 23  4  0
 21 22  4  0
 16 17  1  0
  4 10  1  0
 12 13  1  0
  8  9  1  0
  2 11  1  0
 11 12  2  0
  9 10  2  0
 19 24  4  0
 18 19  4  0
  3  7  1  0
  7 13  2  0
  3  4  2  0
 19 20  1  0
  1  2  2  0
 24 28  1  0
 18 29  1  0
  9 44  1  0
 14 37  1  0
  5 42  1  0
  1 40  1  0
 22 26  1  0
 10 43  1  0
 11 39  1  0
  6 41  1  0
 12 38  1  0
 23 27  1  0
 21 30  1  0
 15 36  1  0
 25 32  1  0
  8 16  2  0
 25 31  1  0
 17 34  1  0
 25 33  1  0
 17 35  1  0
 20 25  1  0
 17 20  1  0
M  END
