# Supplementary material for: Spin Orbit Coupling in Orthogonal Charge Transfer States: (TD-)DFT of Pyrene - Dimethylaniline
Source: Preprints.org preprint supplement (doi:10.20944/preprints202112.0109.v2), 2021-12-16
Supplement: Supplementary file 3 [file supplementary › Supporting INFO-14-12-2021/Coordinate files/PyrDMA/CAMYLYP/T2/PyrDMA-geometry-CAMYLYP-T2-ACN.mol]

PyrDMA-geometry-T2
SCM ADF package: www.scm.com

 44 48  0  0  0  0  0  0  0  0999 V2000
    0.4090   -1.0963   -4.0503 C   0  0  0  0  0  0  0  0  0  0  0  0
    0.7254    0.0795   -3.3689 C   0  0  0  0  0  0  0  0  0  0  0  0
    0.5678    0.1404   -1.9380 C   0  0  0  0  0  0  0  0  0  0  0  0
    0.0772   -1.0293   -1.2606 C   0  0  0  0  0  0  0  0  0  0  0  0
   -0.2243   -2.1797   -1.9915 C   0  0  0  0  0  0  0  0  0  0  0  0
   -0.0649   -2.2347   -3.3831 C   0  0  0  0  0  0  0  0  0  0  0  0
    0.8736    1.2929   -1.2360 C   0  0  0  0  0  0  0  0  0  0  0  0
    0.7121    1.3558    0.1963 C   0  0  0  0  0  0  0  0  0  0  0  0
    0.2175    0.1860    0.8442 C   0  0  0  0  0  0  0  0  0  0  0  0
   -0.0843   -0.9490    0.1485 C   0  0  0  0  0  0  0  0  0  0  0  0
    1.2031    1.2444   -4.0321 C   0  0  0  0  0  0  0  0  0  0  0  0
    1.5020    2.3827   -3.3435 C   0  0  0  0  0  0  0  0  0  0  0  0
    1.3516    2.4603   -1.9298 C   0  0  0  0  0  0  0  0  0  0  0  0
    1.6416    3.6148   -1.2071 C   0  0  0  0  0  0  0  0  0  0  0  0
    1.4842    3.6736    0.1841 C   0  0  0  0  0  0  0  0  0  0  0  0
    1.0240    2.5442    0.8839 C   0  0  0  0  0  0  0  0  0  0  0  0
    0.8280    2.6540    2.3752 C   0  0  0  0  0  0  0  0  0  0  0  0
    2.1942    0.7068    5.2698 C   0  0  0  0  0  0  0  0  0  0  0  0
    1.3049    1.4165    4.4418 C   0  0  0  0  0  0  0  0  0  0  0  0
    1.6702    1.7550    3.1519 N   0  0  0  0  0  0  0  0  0  0  0  0
    1.8290    0.3192    6.5468 C   0  0  0  0  0  0  0  0  0  0  0  0
    0.5775    0.6248    7.0602 C   0  0  0  0  0  0  0  0  0  0  0  0
   -0.3021    1.3399    6.2624 C   0  0  0  0  0  0  0  0  0  0  0  0
    0.0476    1.7385    4.9832 C   0  0  0  0  0  0  0  0  0  0  0  0
    3.0767    1.6998    2.7983 C   0  0  0  0  0  0  0  0  0  0  0  0
    0.2986    0.3214    8.0587 H   0  0  0  0  0  0  0  0  0  0  0  0
   -1.2804    1.6060    6.6391 H   0  0  0  0  0  0  0  0  0  0  0  0
   -0.6689    2.3102    4.4175 H   0  0  0  0  0  0  0  0  0  0  0  0
    3.1775    0.4475    4.9135 H   0  0  0  0  0  0  0  0  0  0  0  0
    2.5415   -0.2296    7.1476 H   0  0  0  0  0  0  0  0  0  0  0  0
    3.4457    0.6753    2.8085 H   0  0  0  0  0  0  0  0  0  0  0  0
    3.2057    2.0844    1.7930 H   0  0  0  0  0  0  0  0  0  0  0  0
    3.6936    2.2956    3.4773 H   0  0  0  0  0  0  0  0  0  0  0  0
   -0.2116    2.4128    2.5814 H   0  0  0  0  0  0  0  0  0  0  0  0
    0.9774    3.6963    2.6753 H   0  0  0  0  0  0  0  0  0  0  0  0
    1.7186    4.5793    0.7210 H   0  0  0  0  0  0  0  0  0  0  0  0
    1.9989    4.4831   -1.7440 H   0  0  0  0  0  0  0  0  0  0  0  0
    1.8606    3.2537   -3.8740 H   0  0  0  0  0  0  0  0  0  0  0  0
    1.3274    1.2168   -5.1056 H   0  0  0  0  0  0  0  0  0  0  0  0
    0.5373   -1.1161   -5.1242 H   0  0  0  0  0  0  0  0  0  0  0  0
   -0.3034   -3.1331   -3.9294 H   0  0  0  0  0  0  0  0  0  0  0  0
   -0.5915   -3.0454   -1.4567 H   0  0  0  0  0  0  0  0  0  0  0  0
   -0.4567   -1.8149    0.6780 H   0  0  0  0  0  0  0  0  0  0  0  0
    0.0861    0.1927    1.9144 H   0  0  0  0  0  0  0  0  0  0  0  0
  3  4  1  0
  7 13  1  0
  2  3  1  0
  7  8  1  0
 11 12  4  0
  9 10  4  0
 18 21  4  0
 23 24  4  0
 22 23  4  0
 21 22  4  0
 13 14  4  0
  1  2  4  0
  4  5  4  0
 16 17  1  0
 14 15  4  0
  5  6  4  0
  1  6  4  0
 15 16  4  0
 19 24  4  0
 18 19  4  0
  8 16  4  0
 19 20  1  0
  4 10  4  0
  2 11  4  0
 12 13  4  0
  8  9  4  0
 24 28  1  0
 18 29  1  0
  6 41  1  0
  9 44  1  0
 15 36  1  0
 22 26  1  0
 12 38  1  0
 11 39  1  0
 10 43  1  0
 23 27  1  0
 21 30  1  0
 14 37  1  0
  1 40  1  0
  5 42  1  0
 25 32  1  0
 17 34  1  0
 25 31  1  0
 25 33  1  0
 17 35  1  0
 20 25  1  0
 17 20  1  0
  3  7  2  0
M  END
