# Supplementary material for: Spin Orbit Coupling in Orthogonal Charge Transfer States: (TD-)DFT of Pyrene - Dimethylaniline
Source: Preprints.org preprint supplement (doi:10.20944/preprints202112.0109.v2), 2021-12-16
Supplement: Supplementary file 3 [file supplementary › Supporting INFO-14-12-2021/Coordinate files/PyrDMA/CAMYLYP/T2/PyrDMA-geometry-CAMYLYP-T2-gas.mol]

PyrDMA-geometry-T2
SCM ADF package: www.scm.com

 44 48  0  0  0  0  0  0  0  0999 V2000
    0.4459   -1.1028   -4.0489 C   0  0  0  0  0  0  0  0  0  0  0  0
    0.7448    0.0784   -3.3646 C   0  0  0  0  0  0  0  0  0  0  0  0
    0.5757    0.1383   -1.9394 C   0  0  0  0  0  0  0  0  0  0  0  0
    0.0941   -1.0347   -1.2689 C   0  0  0  0  0  0  0  0  0  0  0  0
   -0.1896   -2.1887   -2.0044 C   0  0  0  0  0  0  0  0  0  0  0  0
   -0.0200   -2.2440   -3.3906 C   0  0  0  0  0  0  0  0  0  0  0  0
    0.8641    1.2928   -1.2346 C   0  0  0  0  0  0  0  0  0  0  0  0
    0.6939    1.3534    0.1937 C   0  0  0  0  0  0  0  0  0  0  0  0
    0.2113    0.1791    0.8372 C   0  0  0  0  0  0  0  0  0  0  0  0
   -0.0751   -0.9589    0.1360 C   0  0  0  0  0  0  0  0  0  0  0  0
    1.2160    1.2448   -4.0226 C   0  0  0  0  0  0  0  0  0  0  0  0
    1.4979    2.3873   -3.3307 C   0  0  0  0  0  0  0  0  0  0  0  0
    1.3351    2.4625   -1.9210 C   0  0  0  0  0  0  0  0  0  0  0  0
    1.6098    3.6198   -1.1942 C   0  0  0  0  0  0  0  0  0  0  0  0
    1.4463    3.6777    0.1930 C   0  0  0  0  0  0  0  0  0  0  0  0
    0.9928    2.5435    0.8855 C   0  0  0  0  0  0  0  0  0  0  0  0
    0.7980    2.6461    2.3769 C   0  0  0  0  0  0  0  0  0  0  0  0
    2.1628    0.6490    5.2382 C   0  0  0  0  0  0  0  0  0  0  0  0
    1.2993    1.4246    4.4474 C   0  0  0  0  0  0  0  0  0  0  0  0
    1.6500    1.7553    3.1472 N   0  0  0  0  0  0  0  0  0  0  0  0
    1.8111    0.2730    6.5210 C   0  0  0  0  0  0  0  0  0  0  0  0
    0.5998    0.6563    7.0737 C   0  0  0  0  0  0  0  0  0  0  0  0
   -0.2522    1.4373    6.3123 C   0  0  0  0  0  0  0  0  0  0  0  0
    0.0853    1.8250    5.0270 C   0  0  0  0  0  0  0  0  0  0  0  0
    3.0467    1.6710    2.7688 C   0  0  0  0  0  0  0  0  0  0  0  0
    0.3312    0.3609    8.0771 H   0  0  0  0  0  0  0  0  0  0  0  0
   -1.1970    1.7657    6.7234 H   0  0  0  0  0  0  0  0  0  0  0  0
   -0.6022    2.4562    4.4888 H   0  0  0  0  0  0  0  0  0  0  0  0
    3.1133    0.3265    4.8461 H   0  0  0  0  0  0  0  0  0  0  0  0
    2.5007   -0.3301    7.0954 H   0  0  0  0  0  0  0  0  0  0  0  0
    3.3839    0.6354    2.7213 H   0  0  0  0  0  0  0  0  0  0  0  0
    3.1774    2.1016    1.7820 H   0  0  0  0  0  0  0  0  0  0  0  0
    3.6913    2.2101    3.4697 H   0  0  0  0  0  0  0  0  0  0  0  0
   -0.2384    2.3893    2.5894 H   0  0  0  0  0  0  0  0  0  0  0  0
    0.9307    3.6920    2.6783 H   0  0  0  0  0  0  0  0  0  0  0  0
    1.6682    4.5845    0.7324 H   0  0  0  0  0  0  0  0  0  0  0  0
    1.9633    4.4932   -1.7275 H   0  0  0  0  0  0  0  0  0  0  0  0
    1.8532    3.2621   -3.8594 H   0  0  0  0  0  0  0  0  0  0  0  0
    1.3498    1.2195   -5.0961 H   0  0  0  0  0  0  0  0  0  0  0  0
    0.5833   -1.1221   -5.1228 H   0  0  0  0  0  0  0  0  0  0  0  0
   -0.2443   -3.1443   -3.9386 H   0  0  0  0  0  0  0  0  0  0  0  0
   -0.5516   -3.0598   -1.4731 H   0  0  0  0  0  0  0  0  0  0  0  0
   -0.4396   -1.8303    0.6642 H   0  0  0  0  0  0  0  0  0  0  0  0
    0.0812    0.1795    1.9087 H   0  0  0  0  0  0  0  0  0  0  0  0
  3  4  1  0
  7 13  1  0
  2  3  1  0
  7  8  1  0
 11 12  4  0
  9 10  4  0
 18 21  4  0
 22 23  4  0
 23 24  4  0
 21 22  4  0
 13 14  4  0
 16 17  1  0
  1  2  4  0
  1  6  4  0
  4  5  4  0
  5  6  4  0
 14 15  4  0
 19 24  4  0
 15 16  4  0
 18 19  4  0
  8 16  4  0
  4 10  4  0
  2 11  4  0
 12 13  4  0
  8  9  4  0
 19 20  1  0
 24 28  1  0
  6 41  1  0
 18 29  1  0
 15 36  1  0
  9 44  1  0
 22 26  1  0
 23 27  1  0
 21 30  1  0
 12 38  1  0
 11 39  1  0
 10 43  1  0
 14 37  1  0
  5 42  1  0
  1 40  1  0
 25 32  1  0
 17 34  1  0
 25 31  1  0
 25 33  1  0
 17 35  1  0
 20 25  1  0
 17 20  1  0
  3  7  2  0
M  END
