# Supplementary material for: Spin Orbit Coupling in Orthogonal Charge Transfer States: (TD-)DFT of Pyrene - Dimethylaniline
Source: Preprints.org preprint supplement (doi:10.20944/preprints202112.0109.v2), 2021-12-16
Supplement: Supplementary file 3 [file supplementary › Supporting INFO-14-12-2021/Coordinate files/PyrDMA/CAMYLYP/T2/PyrDMA-geometry-CAMYLYP-T2-Hexane.mol]

PyrDMA-geometry-T2
SCM ADF package: www.scm.com

 44 48  0  0  0  0  0  0  0  0999 V2000
    0.4311   -1.0952   -4.0565 C   0  0  0  0  0  0  0  0  0  0  0  0
    0.7366    0.0825   -3.3711 C   0  0  0  0  0  0  0  0  0  0  0  0
    0.5748    0.1389   -1.9430 C   0  0  0  0  0  0  0  0  0  0  0  0
    0.0929   -1.0352   -1.2715 C   0  0  0  0  0  0  0  0  0  0  0  0
   -0.1981   -2.1862   -2.0073 C   0  0  0  0  0  0  0  0  0  0  0  0
   -0.0354   -2.2376   -3.3964 C   0  0  0  0  0  0  0  0  0  0  0  0
    0.8692    1.2915   -1.2371 C   0  0  0  0  0  0  0  0  0  0  0  0
    0.7043    1.3495    0.1931 C   0  0  0  0  0  0  0  0  0  0  0  0
    0.2211    0.1743    0.8368 C   0  0  0  0  0  0  0  0  0  0  0  0
   -0.0706   -0.9613    0.1356 C   0  0  0  0  0  0  0  0  0  0  0  0
    1.2072    1.2508   -4.0293 C   0  0  0  0  0  0  0  0  0  0  0  0
    1.4950    2.3905   -3.3367 C   0  0  0  0  0  0  0  0  0  0  0  0
    1.3393    2.4632   -1.9247 C   0  0  0  0  0  0  0  0  0  0  0  0
    1.6185    3.6182   -1.1975 C   0  0  0  0  0  0  0  0  0  0  0  0
    1.4588    3.6732    0.1918 C   0  0  0  0  0  0  0  0  0  0  0  0
    1.0056    2.5383    0.8855 C   0  0  0  0  0  0  0  0  0  0  0  0
    0.8088    2.6412    2.3768 C   0  0  0  0  0  0  0  0  0  0  0  0
    2.1729    0.6715    5.2570 C   0  0  0  0  0  0  0  0  0  0  0  0
    1.3002    1.4210    4.4494 C   0  0  0  0  0  0  0  0  0  0  0  0
    1.6549    1.7457    3.1504 N   0  0  0  0  0  0  0  0  0  0  0  0
    1.8172    0.3001    6.5406 C   0  0  0  0  0  0  0  0  0  0  0  0
    0.5920    0.6614    7.0788 C   0  0  0  0  0  0  0  0  0  0  0  0
   -0.2700    1.4160    6.3007 C   0  0  0  0  0  0  0  0  0  0  0  0
    0.0714    1.7995    5.0148 C   0  0  0  0  0  0  0  0  0  0  0  0
    3.0547    1.6656    2.7796 C   0  0  0  0  0  0  0  0  0  0  0  0
    0.3203    0.3697    8.0825 H   0  0  0  0  0  0  0  0  0  0  0  0
   -1.2263    1.7266    6.6987 H   0  0  0  0  0  0  0  0  0  0  0  0
   -0.6273    2.4071    4.4642 H   0  0  0  0  0  0  0  0  0  0  0  0
    3.1347    0.3667    4.8786 H   0  0  0  0  0  0  0  0  0  0  0  0
    2.5152   -0.2817    7.1270 H   0  0  0  0  0  0  0  0  0  0  0  0
    3.4007    0.6326    2.7596 H   0  0  0  0  0  0  0  0  0  0  0  0
    3.1839    2.0719    1.7827 H   0  0  0  0  0  0  0  0  0  0  0  0
    3.6921    2.2288    3.4678 H   0  0  0  0  0  0  0  0  0  0  0  0
   -0.2293    2.3905    2.5848 H   0  0  0  0  0  0  0  0  0  0  0  0
    0.9480    3.6853    2.6794 H   0  0  0  0  0  0  0  0  0  0  0  0
    1.6837    4.5791    0.7317 H   0  0  0  0  0  0  0  0  0  0  0  0
    1.9709    4.4915   -1.7309 H   0  0  0  0  0  0  0  0  0  0  0  0
    1.8488    3.2657   -3.8645 H   0  0  0  0  0  0  0  0  0  0  0  0
    1.3351    1.2273   -5.1031 H   0  0  0  0  0  0  0  0  0  0  0  0
    0.5627   -1.1119   -5.1306 H   0  0  0  0  0  0  0  0  0  0  0  0
   -0.2654   -3.1361   -3.9453 H   0  0  0  0  0  0  0  0  0  0  0  0
   -0.5601   -3.0569   -1.4761 H   0  0  0  0  0  0  0  0  0  0  0  0
   -0.4356   -1.8325    0.6628 H   0  0  0  0  0  0  0  0  0  0  0  0
    0.0933    0.1746    1.9081 H   0  0  0  0  0  0  0  0  0  0  0  0
  3  4  1  0
  7 13  1  0
  2  3  1  0
  7  8  1  0
 11 12  4  0
  9 10  4  0
 18 21  4  0
 23 24  4  0
 22 23  4  0
 21 22  4  0
 13 14  4  0
  1  2  4  0
  4  5  4  0
 16 17  1  0
  1  6  4  0
  5  6  4  0
 14 15  4  0
 19 24  4  0
 15 16  4  0
 18 19  4  0
  8 16  4  0
  4 10  4  0
  2 11  4  0
 12 13  4  0
 19 20  1  0
  8  9  4  0
 24 28  1  0
 18 29  1  0
  6 41  1  0
 15 36  1  0
  9 44  1  0
 22 26  1  0
 21 30  1  0
 23 27  1  0
 12 38  1  0
 11 39  1  0
 10 43  1  0
 14 37  1  0
  1 40  1  0
  5 42  1  0
 25 32  1  0
 17 34  1  0
 25 31  1  0
 25 33  1  0
 17 35  1  0
 20 25  1  0
 17 20  1  0
  3  7  2  0
M  END
