# Supplementary material for: Spin Orbit Coupling in Orthogonal Charge Transfer States: (TD-)DFT of Pyrene - Dimethylaniline
Source: Preprints.org preprint supplement (doi:10.20944/preprints202112.0109.v2), 2021-12-16
Supplement: Supplementary file 3 [file supplementary › Supporting INFO-14-12-2021/Coordinate files/PyrDMA/PBE/S0/PyrDMA-geometry-PBE-S0-ACN.mol]

S0-ACN
SCM ADF package: www.scm.com

 44 48  0  0  0  0  0  0  0  0999 V2000
    0.3763   -1.1576   -4.0357 C   0  0  0  0  0  0  0  0  0  0  0  0
    0.7153    0.0324   -3.3639 C   0  0  0  0  0  0  0  0  0  0  0  0
    0.5402    0.1053   -1.9443 C   0  0  0  0  0  0  0  0  0  0  0  0
    0.0222   -1.0253   -1.2370 C   0  0  0  0  0  0  0  0  0  0  0  0
   -0.3039   -2.1945   -1.9515 C   0  0  0  0  0  0  0  0  0  0  0  0
   -0.1273   -2.2561   -3.3349 C   0  0  0  0  0  0  0  0  0  0  0  0
    0.8782    1.2995   -1.2387 C   0  0  0  0  0  0  0  0  0  0  0  0
    0.7059    1.3722    0.1828 C   0  0  0  0  0  0  0  0  0  0  0  0
    0.1786    0.2192    0.8608 C   0  0  0  0  0  0  0  0  0  0  0  0
   -0.1488   -0.9229    0.1828 C   0  0  0  0  0  0  0  0  0  0  0  0
    1.2321    1.1790   -4.0571 C   0  0  0  0  0  0  0  0  0  0  0  0
    1.5512    2.3255   -3.3854 C   0  0  0  0  0  0  0  0  0  0  0  0
    1.3860    2.4264   -1.9625 C   0  0  0  0  0  0  0  0  0  0  0  0
    1.7036    3.5981   -1.2546 C   0  0  0  0  0  0  0  0  0  0  0  0
    1.5356    3.6582    0.1283 C   0  0  0  0  0  0  0  0  0  0  0  0
    1.0482    2.5699    0.8631 C   0  0  0  0  0  0  0  0  0  0  0  0
    0.8588    2.7151    2.3594 C   0  0  0  0  0  0  0  0  0  0  0  0
    2.2644    0.8310    5.3157 C   0  0  0  0  0  0  0  0  0  0  0  0
    1.3248    1.4158    4.4241 C   0  0  0  0  0  0  0  0  0  0  0  0
    1.7222    1.8328    3.1566 N   0  0  0  0  0  0  0  0  0  0  0  0
    1.8730    0.3458    6.5643 C   0  0  0  0  0  0  0  0  0  0  0  0
    0.5435    0.4285    6.9908 C   0  0  0  0  0  0  0  0  0  0  0  0
   -0.3894    1.0219    6.1331 C   0  0  0  0  0  0  0  0  0  0  0  0
   -0.0166    1.5126    4.8811 C   0  0  0  0  0  0  0  0  0  0  0  0
    3.1506    1.9214    2.8727 C   0  0  0  0  0  0  0  0  0  0  0  0
    0.2436    0.0511    7.9700 H   0  0  0  0  0  0  0  0  0  0  0  0
   -1.4336    1.1155    6.4413 H   0  0  0  0  0  0  0  0  0  0  0  0
   -0.7874    1.9758    4.2669 H   0  0  0  0  0  0  0  0  0  0  0  0
    3.3123    0.7504    5.0317 H   0  0  0  0  0  0  0  0  0  0  0  0
    2.6299   -0.0998    7.2145 H   0  0  0  0  0  0  0  0  0  0  0  0
    3.6309    0.9367    2.9569 H   0  0  0  0  0  0  0  0  0  0  0  0
    3.2844    2.2673    1.8426 H   0  0  0  0  0  0  0  0  0  0  0  0
    3.6700    2.6241    3.5500 H   0  0  0  0  0  0  0  0  0  0  0  0
   -0.1860    2.4834    2.5959 H   0  0  0  0  0  0  0  0  0  0  0  0
    1.0193    3.7742    2.6366 H   0  0  0  0  0  0  0  0  0  0  0  0
    1.7910    4.5788    0.6591 H   0  0  0  0  0  0  0  0  0  0  0  0
    2.0888    4.4640   -1.7981 H   0  0  0  0  0  0  0  0  0  0  0  0
    1.9410    3.1924   -3.9245 H   0  0  0  0  0  0  0  0  0  0  0  0
    1.3636    1.1168   -5.1401 H   0  0  0  0  0  0  0  0  0  0  0  0
    0.5112   -1.2120   -5.1186 H   0  0  0  0  0  0  0  0  0  0  0  0
   -0.3850   -3.1700   -3.8739 H   0  0  0  0  0  0  0  0  0  0  0  0
   -0.6991   -3.0561   -1.4082 H   0  0  0  0  0  0  0  0  0  0  0  0
   -0.5496   -1.7848    0.7218 H   0  0  0  0  0  0  0  0  0  0  0  0
    0.0471    0.2560    1.9425 H   0  0  0  0  0  0  0  0  0  0  0  0
  1 40  1  0
  1  6  4  0
  1  2  4  0
  2  3  4  0
  2 11  1  0
  3  7  1  0
  3  4  4  0
  4  5  4  0
  4 10  1  0
  5 42  1  0
  5  6  4  0
  6 41  1  0
  7 13  4  0
  7  8  4  0
  8 16  4  0
  8  9  1  0
  9 44  1  0
  9 10  2  0
 10 43  1  0
 11 39  1  0
 11 12  2  0
 12 38  1  0
 12 13  1  0
 13 14  4  0
 14 37  1  0
 14 15  4  0
 15 36  1  0
 15 16  4  0
 16 17  1  0
 17 34  1  0
 17 35  1  0
 17 20  1  0
 18 29  1  0
 18 21  4  0
 18 19  4  0
 19 20  1  0
 19 24  4  0
 20 25  1  0
 21 30  1  0
 21 22  4  0
 22 26  1  0
 22 23  4  0
 23 27  1  0
 23 24  4  0
 24 28  1  0
 25 32  1  0
 25 31  1  0
 25 33  1  0
M  END
