# Supplementary material for: Spin Orbit Coupling in Orthogonal Charge Transfer States: (TD-)DFT of Pyrene - Dimethylaniline
Source: Preprints.org preprint supplement (doi:10.20944/preprints202112.0109.v2), 2021-12-16
Supplement: Supplementary file 3 [file supplementary › Supporting INFO-14-12-2021/Coordinate files/PyrDMA/PBE/S0/PyrDMA-geometry-PBE-S0-Gas.mol]

S0-gas
SCM ADF package: www.scm.com

 44 48  0  0  0  0  0  0  0  0999 V2000
    0.4171   -1.0989   -4.1274 C   0  0  0  0  0  0  0  0  0  0  0  0
    0.7284    0.0774   -3.4214 C   0  0  0  0  0  0  0  0  0  0  0  0
    0.5583    0.1020   -2.0002 C   0  0  0  0  0  0  0  0  0  0  0  0
    0.0742   -1.0626   -1.3259 C   0  0  0  0  0  0  0  0  0  0  0  0
   -0.2245   -2.2160   -2.0755 C   0  0  0  0  0  0  0  0  0  0  0  0
   -0.0540   -2.2305   -3.4598 C   0  0  0  0  0  0  0  0  0  0  0  0
    0.8678    1.2818   -1.2597 C   0  0  0  0  0  0  0  0  0  0  0  0
    0.6987    1.3056    0.1633 C   0  0  0  0  0  0  0  0  0  0  0  0
    0.2103    0.1187    0.8092 C   0  0  0  0  0  0  0  0  0  0  0  0
   -0.0893   -1.0087    0.0963 C   0  0  0  0  0  0  0  0  0  0  0  0
    1.2116    1.2575   -4.0790 C   0  0  0  0  0  0  0  0  0  0  0  0
    1.5049    2.3897   -3.3738 C   0  0  0  0  0  0  0  0  0  0  0  0
    1.3437    2.4431   -1.9490 C   0  0  0  0  0  0  0  0  0  0  0  0
    1.6342    3.5988   -1.2055 C   0  0  0  0  0  0  0  0  0  0  0  0
    1.4667    3.6128    0.1779 C   0  0  0  0  0  0  0  0  0  0  0  0
    1.0085    2.4911    0.8793 C   0  0  0  0  0  0  0  0  0  0  0  0
    0.8017    2.5888    2.3754 C   0  0  0  0  0  0  0  0  0  0  0  0
    2.2170    0.7184    5.3310 C   0  0  0  0  0  0  0  0  0  0  0  0
    1.3126    1.4082    4.4845 C   0  0  0  0  0  0  0  0  0  0  0  0
    1.6646    1.7050    3.1660 N   0  0  0  0  0  0  0  0  0  0  0  0
    1.8577    0.3588    6.6288 C   0  0  0  0  0  0  0  0  0  0  0  0
    0.5993    0.6776    7.1462 C   0  0  0  0  0  0  0  0  0  0  0  0
   -0.2921    1.3808    6.3329 C   0  0  0  0  0  0  0  0  0  0  0  0
    0.0514    1.7513    5.0324 C   0  0  0  0  0  0  0  0  0  0  0  0
    3.0742    1.6541    2.8020 C   0  0  0  0  0  0  0  0  0  0  0  0
    0.3250    0.3960    8.1639 H   0  0  0  0  0  0  0  0  0  0  0  0
   -1.2756    1.6628    6.7160 H   0  0  0  0  0  0  0  0  0  0  0  0
   -0.6733    2.3222    4.4543 H   0  0  0  0  0  0  0  0  0  0  0  0
    3.2093    0.4511    4.9713 H   0  0  0  0  0  0  0  0  0  0  0  0
    2.5823   -0.1786    7.2451 H   0  0  0  0  0  0  0  0  0  0  0  0
    3.4615    0.6269    2.8699 H   0  0  0  0  0  0  0  0  0  0  0  0
    3.1844    1.9778    1.7619 H   0  0  0  0  0  0  0  0  0  0  0  0
    3.6972    2.3043    3.4443 H   0  0  0  0  0  0  0  0  0  0  0  0
   -0.2406    2.3130    2.5904 H   0  0  0  0  0  0  0  0  0  0  0  0
    0.9179    3.6477    2.6832 H   0  0  0  0  0  0  0  0  0  0  0  0
    1.6971    4.5236    0.7368 H   0  0  0  0  0  0  0  0  0  0  0  0
    1.9952    4.4908   -1.7229 H   0  0  0  0  0  0  0  0  0  0  0  0
    1.8699    3.2822   -3.8880 H   0  0  0  0  0  0  0  0  0  0  0  0
    1.3398    1.2333   -5.1640 H   0  0  0  0  0  0  0  0  0  0  0  0
    0.5479   -1.1164   -5.2121 H   0  0  0  0  0  0  0  0  0  0  0  0
   -0.2908   -3.1339   -4.0257 H   0  0  0  0  0  0  0  0  0  0  0  0
   -0.5940   -3.1043   -1.5575 H   0  0  0  0  0  0  0  0  0  0  0  0
   -0.4598   -1.8987    0.6112 H   0  0  0  0  0  0  0  0  0  0  0  0
    0.0957    0.1176    1.8935 H   0  0  0  0  0  0  0  0  0  0  0  0
  1 40  1  0
  1  6  4  0
  1  2  4  0
  2  3  4  0
  2 11  1  0
  3  7  1  0
  3  4  4  0
  4  5  4  0
  4 10  1  0
  5 42  1  0
  5  6  4  0
  6 41  1  0
  7 13  4  0
  7  8  4  0
  8 16  4  0
  8  9  1  0
  9 44  1  0
  9 10  2  0
 10 43  1  0
 11 39  1  0
 11 12  4  0
 12 38  1  0
 12 13  4  0
 13 14  1  0
 14 37  1  0
 14 15  4  0
 15 36  1  0
 15 16  4  0
 16 17  1  0
 17 34  1  0
 17 35  1  0
 17 20  1  0
 18 29  1  0
 18 21  4  0
 18 19  4  0
 19 20  1  0
 19 24  4  0
 20 25  1  0
 21 30  1  0
 21 22  4  0
 22 26  1  0
 22 23  4  0
 23 27  1  0
 23 24  4  0
 24 28  1  0
 25 32  1  0
 25 31  1  0
 25 33  1  0
M  END
