# Supplementary material for: Spin Orbit Coupling in Orthogonal Charge Transfer States: (TD-)DFT of Pyrene - Dimethylaniline
Source: Preprints.org preprint supplement (doi:10.20944/preprints202112.0109.v2), 2021-12-16
Supplement: Supplementary file 3 [file supplementary › Supporting INFO-14-12-2021/Coordinate files/PyrDMA/PBE/S0/PyrDMA-geometry-PBE-S0-Hexane.mol]

S0-Hexane
SCM ADF package: www.scm.com

 44 48  0  0  0  0  0  0  0  0999 V2000
    0.4131   -1.1052   -4.1193 C   0  0  0  0  0  0  0  0  0  0  0  0
    0.7270    0.0727   -3.4162 C   0  0  0  0  0  0  0  0  0  0  0  0
    0.5568    0.1017   -1.9949 C   0  0  0  0  0  0  0  0  0  0  0  0
    0.0696   -1.0599   -1.3173 C   0  0  0  0  0  0  0  0  0  0  0  0
   -0.2319   -2.2153   -2.0633 C   0  0  0  0  0  0  0  0  0  0  0  0
   -0.0610   -2.2341   -3.4480 C   0  0  0  0  0  0  0  0  0  0  0  0
    0.8691    1.2831   -1.2578 C   0  0  0  0  0  0  0  0  0  0  0  0
    0.7000    1.3116    0.1653 C   0  0  0  0  0  0  0  0  0  0  0  0
    0.2072    0.1279    0.8142 C   0  0  0  0  0  0  0  0  0  0  0  0
   -0.0950   -1.0017    0.1051 C   0  0  0  0  0  0  0  0  0  0  0  0
    1.2131    1.2500   -4.0780 C   0  0  0  0  0  0  0  0  0  0  0  0
    1.5086    2.3839   -3.3759 C   0  0  0  0  0  0  0  0  0  0  0  0
    1.3473    2.4415   -1.9508 C   0  0  0  0  0  0  0  0  0  0  0  0
    1.6401    3.5993   -1.2107 C   0  0  0  0  0  0  0  0  0  0  0  0
    1.4727    3.6176    0.1730 C   0  0  0  0  0  0  0  0  0  0  0  0
    1.0125    2.4985    0.8778 C   0  0  0  0  0  0  0  0  0  0  0  0
    0.8062    2.6013    2.3740 C   0  0  0  0  0  0  0  0  0  0  0  0
    2.2223    0.7249    5.3281 C   0  0  0  0  0  0  0  0  0  0  0  0
    1.3152    1.4100    4.4785 C   0  0  0  0  0  0  0  0  0  0  0  0
    1.6726    1.7203    3.1664 N   0  0  0  0  0  0  0  0  0  0  0  0
    1.8575    0.3510    6.6208 C   0  0  0  0  0  0  0  0  0  0  0  0
    0.5914    0.6521    7.1321 C   0  0  0  0  0  0  0  0  0  0  0  0
   -0.3030    1.3507    6.3165 C   0  0  0  0  0  0  0  0  0  0  0  0
    0.0450    1.7336    5.0203 C   0  0  0  0  0  0  0  0  0  0  0  0
    3.0851    1.6831    2.8085 C   0  0  0  0  0  0  0  0  0  0  0  0
    0.3135    0.3613    8.1464 H   0  0  0  0  0  0  0  0  0  0  0  0
   -1.2925    1.6185    6.6944 H   0  0  0  0  0  0  0  0  0  0  0  0
   -0.6831    2.2982    4.4404 H   0  0  0  0  0  0  0  0  0  0  0  0
    3.2202    0.4722    4.9735 H   0  0  0  0  0  0  0  0  0  0  0  0
    2.5844   -0.1814    7.2388 H   0  0  0  0  0  0  0  0  0  0  0  0
    3.4844    0.6615    2.8834 H   0  0  0  0  0  0  0  0  0  0  0  0
    3.1960    2.0036    1.7677 H   0  0  0  0  0  0  0  0  0  0  0  0
    3.6974    2.3447    3.4492 H   0  0  0  0  0  0  0  0  0  0  0  0
   -0.2356    2.3269    2.5906 H   0  0  0  0  0  0  0  0  0  0  0  0
    0.9246    3.6603    2.6778 H   0  0  0  0  0  0  0  0  0  0  0  0
    1.7054    4.5296    0.7288 H   0  0  0  0  0  0  0  0  0  0  0  0
    2.0026    4.4892   -1.7306 H   0  0  0  0  0  0  0  0  0  0  0  0
    1.8753    3.2745   -3.8922 H   0  0  0  0  0  0  0  0  0  0  0  0
    1.3407    1.2218   -5.1629 H   0  0  0  0  0  0  0  0  0  0  0  0
    0.5437   -1.1262   -5.2039 H   0  0  0  0  0  0  0  0  0  0  0  0
   -0.2999   -3.1384   -4.0114 H   0  0  0  0  0  0  0  0  0  0  0  0
   -0.6038   -3.1011   -1.5429 H   0  0  0  0  0  0  0  0  0  0  0  0
   -0.4693   -1.8889    0.6219 H   0  0  0  0  0  0  0  0  0  0  0  0
    0.0885    0.1317    1.8980 H   0  0  0  0  0  0  0  0  0  0  0  0
  1 40  1  0
  1  6  4  0
  1  2  4  0
  2  3  4  0
  2 11  1  0
  3  7  1  0
  3  4  4  0
  4  5  4  0
  4 10  1  0
  5 42  1  0
  5  6  4  0
  6 41  1  0
  7 13  4  0
  7  8  4  0
  8 16  4  0
  8  9  1  0
  9 44  1  0
  9 10  2  0
 10 43  1  0
 11 39  1  0
 11 12  4  0
 12 38  1  0
 12 13  4  0
 13 14  1  0
 14 37  1  0
 14 15  4  0
 15 36  1  0
 15 16  4  0
 16 17  1  0
 17 34  1  0
 17 35  1  0
 17 20  1  0
 18 29  1  0
 18 21  4  0
 18 19  4  0
 19 20  1  0
 19 24  4  0
 20 25  1  0
 21 30  1  0
 21 22  4  0
 22 26  1  0
 22 23  4  0
 23 27  1  0
 23 24  4  0
 24 28  1  0
 25 32  1  0
 25 31  1  0
 25 33  1  0
M  END
