# Supplementary material for: Spin Orbit Coupling in Orthogonal Charge Transfer States: (TD-)DFT of Pyrene - Dimethylaniline
Source: Preprints.org preprint supplement (doi:10.20944/preprints202112.0109.v2), 2021-12-16
Supplement: Supplementary file 3 [file supplementary › Supporting INFO-14-12-2021/Coordinate files/PyrDMA/PBE/S1/PyrDMA-geometry-PBE-S1-ACN.mol]

S1-ACN
SCM ADF package: www.scm.com

 44 48  0  0  0  0  0  0  0  0999 V2000
    0.4321   -0.9177   -4.4241 C   0  0  0  0  0  0  0  0  0  0  0  0
    0.7344    0.1988   -3.5898 C   0  0  0  0  0  0  0  0  0  0  0  0
    0.5751    0.0729   -2.1650 C   0  0  0  0  0  0  0  0  0  0  0  0
    0.1159   -1.1724   -1.6111 C   0  0  0  0  0  0  0  0  0  0  0  0
   -0.1718   -2.2612   -2.4897 C   0  0  0  0  0  0  0  0  0  0  0  0
   -0.0124   -2.1184   -3.8677 C   0  0  0  0  0  0  0  0  0  0  0  0
    0.8618    1.1859   -1.3057 C   0  0  0  0  0  0  0  0  0  0  0  0
    0.6789    1.0659    0.1234 C   0  0  0  0  0  0  0  0  0  0  0  0
    0.2410   -0.1843    0.6316 C   0  0  0  0  0  0  0  0  0  0  0  0
   -0.0362   -1.2632   -0.2062 C   0  0  0  0  0  0  0  0  0  0  0  0
    1.1832    1.4375   -4.1189 C   0  0  0  0  0  0  0  0  0  0  0  0
    1.4641    2.5144   -3.2919 C   0  0  0  0  0  0  0  0  0  0  0  0
    1.3124    2.4261   -1.8845 C   0  0  0  0  0  0  0  0  0  0  0  0
    1.5709    3.5414   -1.0219 C   0  0  0  0  0  0  0  0  0  0  0  0
    1.3700    3.4266    0.3427 C   0  0  0  0  0  0  0  0  0  0  0  0
    0.9384    2.2269    0.9452 C   0  0  0  0  0  0  0  0  0  0  0  0
    0.5902    2.2404    2.3864 C   0  0  0  0  0  0  0  0  0  0  0  0
    2.2660    0.8426    5.5804 C   0  0  0  0  0  0  0  0  0  0  0  0
    1.3544    1.4961    4.6869 C   0  0  0  0  0  0  0  0  0  0  0  0
    1.6268    1.6144    3.3739 N   0  0  0  0  0  0  0  0  0  0  0  0
    1.9694    0.7268    6.9256 C   0  0  0  0  0  0  0  0  0  0  0  0
    0.7717    1.2492    7.4433 C   0  0  0  0  0  0  0  0  0  0  0  0
   -0.1348    1.8946    6.5833 C   0  0  0  0  0  0  0  0  0  0  0  0
    0.1355    2.0203    5.2349 C   0  0  0  0  0  0  0  0  0  0  0  0
    2.8882    1.1417    2.8263 C   0  0  0  0  0  0  0  0  0  0  0  0
    0.5426    1.1493    8.5046 H   0  0  0  0  0  0  0  0  0  0  0  0
   -1.0672    2.2989    6.9798 H   0  0  0  0  0  0  0  0  0  0  0  0
   -0.5817    2.5195    4.5903 H   0  0  0  0  0  0  0  0  0  0  0  0
    3.1906    0.4185    5.1948 H   0  0  0  0  0  0  0  0  0  0  0  0
    2.6709    0.2174    7.5876 H   0  0  0  0  0  0  0  0  0  0  0  0
    2.9471    0.0484    2.9058 H   0  0  0  0  0  0  0  0  0  0  0  0
    2.9041    1.4195    1.7691 H   0  0  0  0  0  0  0  0  0  0  0  0
    3.7346    1.5950    3.3570 H   0  0  0  0  0  0  0  0  0  0  0  0
   -0.3325    1.6857    2.6044 H   0  0  0  0  0  0  0  0  0  0  0  0
    0.4760    3.2697    2.7515 H   0  0  0  0  0  0  0  0  0  0  0  0
    1.5260    4.3115    0.9709 H   0  0  0  0  0  0  0  0  0  0  0  0
    1.8906    4.4859   -1.4664 H   0  0  0  0  0  0  0  0  0  0  0  0
    1.8013    3.4598   -3.7250 H   0  0  0  0  0  0  0  0  0  0  0  0
    1.2992    1.5283   -5.2026 H   0  0  0  0  0  0  0  0  0  0  0  0
    0.5503   -0.8163   -5.5054 H   0  0  0  0  0  0  0  0  0  0  0  0
   -0.2413   -2.9604   -4.5275 H   0  0  0  0  0  0  0  0  0  0  0  0
   -0.5242   -3.2055   -2.0690 H   0  0  0  0  0  0  0  0  0  0  0  0
   -0.3879   -2.2098    0.2130 H   0  0  0  0  0  0  0  0  0  0  0  0
    0.0887   -0.3171    1.7066 H   0  0  0  0  0  0  0  0  0  0  0  0
  1 40  1  0
  1  6  4  0
  1  2  4  0
  2 11  4  0
  2  3  1  0
  3  7  4  0
  3  4  1  0
  4 10  4  0
  4  5  4  0
  5 42  1  0
  5  6  4  0
  6 41  1  0
  7 13  1  0
  7  8  1  0
  8  9  4  0
  8 16  1  0
  9 44  1  0
  9 10  4  0
 10 43  1  0
 11 39  1  0
 11 12  4  0
 12 38  1  0
 12 13  4  0
 13 14  4  0
 14 37  1  0
 14 15  4  0
 15 36  1  0
 15 16  4  0
 16 17  1  0
 17 35  1  0
 17 34  1  0
 17 20  1  0
 18 29  1  0
 18 21  4  0
 18 19  4  0
 19 20  1  0
 19 24  4  0
 20 25  1  0
 21 30  1  0
 21 22  4  0
 22 26  1  0
 22 23  4  0
 23 27  1  0
 23 24  4  0
 24 28  1  0
 25 32  1  0
 25 33  1  0
 25 31  1  0
M  END
