# Supplementary material for: Spin Orbit Coupling in Orthogonal Charge Transfer States: (TD-)DFT of Pyrene - Dimethylaniline
Source: Preprints.org preprint supplement (doi:10.20944/preprints202112.0109.v2), 2021-12-16
Supplement: Supplementary file 3 [file supplementary › Supporting INFO-14-12-2021/Coordinate files/PyrDMA/PBE/S1/PyrDMA-geometry-PBE-S1-Gas.mol]

S1-Gas
SCM ADF package: www.scm.com

 44 48  0  0  0  0  0  0  0  0999 V2000
    0.4545   -0.8931   -4.4508 C   0  0  0  0  0  0  0  0  0  0  0  0
    0.7459    0.2164   -3.6049 C   0  0  0  0  0  0  0  0  0  0  0  0
    0.5750    0.0752   -2.1831 C   0  0  0  0  0  0  0  0  0  0  0  0
    0.1173   -1.1773   -1.6447 C   0  0  0  0  0  0  0  0  0  0  0  0
   -0.1594   -2.2571   -2.5361 C   0  0  0  0  0  0  0  0  0  0  0  0
    0.0106   -2.1001   -3.9101 C   0  0  0  0  0  0  0  0  0  0  0  0
    0.8525    1.1790   -1.3100 C   0  0  0  0  0  0  0  0  0  0  0  0
    0.6635    1.0421    0.1157 C   0  0  0  0  0  0  0  0  0  0  0  0
    0.2300   -0.2151    0.6080 C   0  0  0  0  0  0  0  0  0  0  0  0
   -0.0387   -1.2838   -0.2425 C   0  0  0  0  0  0  0  0  0  0  0  0
    1.1966    1.4613   -4.1141 C   0  0  0  0  0  0  0  0  0  0  0  0
    1.4684    2.5290   -3.2734 C   0  0  0  0  0  0  0  0  0  0  0  0
    1.3054    2.4259   -1.8695 C   0  0  0  0  0  0  0  0  0  0  0  0
    1.5575    3.5262   -0.9908 C   0  0  0  0  0  0  0  0  0  0  0  0
    1.3490    3.3940    0.3719 C   0  0  0  0  0  0  0  0  0  0  0  0
    0.9145    2.1899    0.9569 C   0  0  0  0  0  0  0  0  0  0  0  0
    0.5690    2.1825    2.4060 C   0  0  0  0  0  0  0  0  0  0  0  0
    2.2808    0.8811    5.5995 C   0  0  0  0  0  0  0  0  0  0  0  0
    1.3421    1.4871    4.6999 C   0  0  0  0  0  0  0  0  0  0  0  0
    1.5995    1.5683    3.3801 N   0  0  0  0  0  0  0  0  0  0  0  0
    2.0127    0.8153    6.9502 C   0  0  0  0  0  0  0  0  0  0  0  0
    0.8160    1.3400    7.4667 C   0  0  0  0  0  0  0  0  0  0  0  0
   -0.1195    1.9346    6.6017 C   0  0  0  0  0  0  0  0  0  0  0  0
    0.1230    2.0112    5.2478 C   0  0  0  0  0  0  0  0  0  0  0  0
    2.8571    1.0808    2.8263 C   0  0  0  0  0  0  0  0  0  0  0  0
    0.6109    1.2831    8.5351 H   0  0  0  0  0  0  0  0  0  0  0  0
   -1.0487    2.3400    7.0015 H   0  0  0  0  0  0  0  0  0  0  0  0
   -0.6122    2.4720    4.5961 H   0  0  0  0  0  0  0  0  0  0  0  0
    3.2063    0.4641    5.2111 H   0  0  0  0  0  0  0  0  0  0  0  0
    2.7356    0.3487    7.6190 H   0  0  0  0  0  0  0  0  0  0  0  0
    2.9262   -0.0073    2.9477 H   0  0  0  0  0  0  0  0  0  0  0  0
    2.8586    1.3249    1.7608 H   0  0  0  0  0  0  0  0  0  0  0  0
    3.7052    1.5657    3.3247 H   0  0  0  0  0  0  0  0  0  0  0  0
   -0.3542    1.6214    2.6054 H   0  0  0  0  0  0  0  0  0  0  0  0
    0.4364    3.2096    2.7703 H   0  0  0  0  0  0  0  0  0  0  0  0
    1.5094    4.2660    1.0163 H   0  0  0  0  0  0  0  0  0  0  0  0
    1.8855    4.4785   -1.4126 H   0  0  0  0  0  0  0  0  0  0  0  0
    1.8101    3.4799   -3.6915 H   0  0  0  0  0  0  0  0  0  0  0  0
    1.3249    1.5679   -5.1952 H   0  0  0  0  0  0  0  0  0  0  0  0
    0.5821   -0.7830   -5.5305 H   0  0  0  0  0  0  0  0  0  0  0  0
   -0.2091   -2.9378   -4.5786 H   0  0  0  0  0  0  0  0  0  0  0  0
   -0.5096   -3.2075   -2.1263 H   0  0  0  0  0  0  0  0  0  0  0  0
   -0.3820   -2.2353    0.1732 H   0  0  0  0  0  0  0  0  0  0  0  0
    0.0863   -0.3613    1.6820 H   0  0  0  0  0  0  0  0  0  0  0  0
  1 40  1  0
  1  6  4  0
  1  2  4  0
  2 11  4  0
  2  3  1  0
  3  7  4  0
  3  4  1  0
  4 10  4  0
  4  5  4  0
  5 42  1  0
  5  6  4  0
  6 41  1  0
  7 13  1  0
  7  8  1  0
  8  9  4  0
  8 16  1  0
  9 44  1  0
  9 10  4  0
 10 43  1  0
 11 39  1  0
 11 12  4  0
 12 38  1  0
 12 13  4  0
 13 14  4  0
 14 37  1  0
 14 15  4  0
 15 36  1  0
 15 16  4  0
 16 17  1  0
 17 35  1  0
 17 34  1  0
 17 20  1  0
 18 29  1  0
 18 21  4  0
 18 19  4  0
 19 20  1  0
 19 24  1  0
 20 25  1  0
 21 30  1  0
 21 22  4  0
 22 26  1  0
 22 23  4  0
 23 27  1  0
 23 24  4  0
 24 28  1  0
 25 32  1  0
 25 33  1  0
 25 31  1  0
M  END
