# Supplementary material for: Spin Orbit Coupling in Orthogonal Charge Transfer States: (TD-)DFT of Pyrene - Dimethylaniline
Source: Preprints.org preprint supplement (doi:10.20944/preprints202112.0109.v2), 2021-12-16
Supplement: Supplementary file 3 [file supplementary › Supporting INFO-14-12-2021/Coordinate files/PyrDMA/PBE/S1/PyrDMA-geometry-PBE-S1-Hexane.mol]

S1-Hexane
SCM ADF package: www.scm.com

 44 48  0  0  0  0  0  0  0  0999 V2000
    0.4484   -0.8924   -4.4524 C   0  0  0  0  0  0  0  0  0  0  0  0
    0.7430    0.2159   -3.6054 C   0  0  0  0  0  0  0  0  0  0  0  0
    0.5748    0.0740   -2.1833 C   0  0  0  0  0  0  0  0  0  0  0  0
    0.1157   -1.1781   -1.6453 C   0  0  0  0  0  0  0  0  0  0  0  0
   -0.1645   -2.2573   -2.5371 C   0  0  0  0  0  0  0  0  0  0  0  0
    0.0032   -2.0994   -3.9118 C   0  0  0  0  0  0  0  0  0  0  0  0
    0.8549    1.1773   -1.3100 C   0  0  0  0  0  0  0  0  0  0  0  0
    0.6667    1.0404    0.1163 C   0  0  0  0  0  0  0  0  0  0  0  0
    0.2313   -0.2166    0.6083 C   0  0  0  0  0  0  0  0  0  0  0  0
   -0.0401   -1.2852   -0.2426 C   0  0  0  0  0  0  0  0  0  0  0  0
    1.1939    1.4607   -4.1161 C   0  0  0  0  0  0  0  0  0  0  0  0
    1.4683    2.5280   -3.2754 C   0  0  0  0  0  0  0  0  0  0  0  0
    1.3078    2.4241   -1.8707 C   0  0  0  0  0  0  0  0  0  0  0  0
    1.5611    3.5263   -0.9930 C   0  0  0  0  0  0  0  0  0  0  0  0
    1.3533    3.3949    0.3696 C   0  0  0  0  0  0  0  0  0  0  0  0
    0.9198    2.1896    0.9557 C   0  0  0  0  0  0  0  0  0  0  0  0
    0.5702    2.1852    2.4014 C   0  0  0  0  0  0  0  0  0  0  0  0
    2.2824    0.8840    5.6037 C   0  0  0  0  0  0  0  0  0  0  0  0
    1.3466    1.4909    4.7015 C   0  0  0  0  0  0  0  0  0  0  0  0
    1.6051    1.5729    3.3825 N   0  0  0  0  0  0  0  0  0  0  0  0
    2.0086    0.8134    6.9546 C   0  0  0  0  0  0  0  0  0  0  0  0
    0.8094    1.3351    7.4694 C   0  0  0  0  0  0  0  0  0  0  0  0
   -0.1223    1.9321    6.6016 C   0  0  0  0  0  0  0  0  0  0  0  0
    0.1254    2.0129    5.2475 C   0  0  0  0  0  0  0  0  0  0  0  0
    2.8620    1.0844    2.8313 C   0  0  0  0  0  0  0  0  0  0  0  0
    0.5995    1.2736    8.5370 H   0  0  0  0  0  0  0  0  0  0  0  0
   -1.0546    2.3350    6.9980 H   0  0  0  0  0  0  0  0  0  0  0  0
   -0.6089    2.4745    4.5949 H   0  0  0  0  0  0  0  0  0  0  0  0
    3.2099    0.4674    5.2186 H   0  0  0  0  0  0  0  0  0  0  0  0
    2.7296    0.3443    7.6243 H   0  0  0  0  0  0  0  0  0  0  0  0
    2.9303   -0.0036    2.9552 H   0  0  0  0  0  0  0  0  0  0  0  0
    2.8627    1.3252    1.7651 H   0  0  0  0  0  0  0  0  0  0  0  0
    3.7115    1.5682    3.3288 H   0  0  0  0  0  0  0  0  0  0  0  0
   -0.3494    1.6199    2.6052 H   0  0  0  0  0  0  0  0  0  0  0  0
    0.4368    3.2118    2.7668 H   0  0  0  0  0  0  0  0  0  0  0  0
    1.5107    4.2695    1.0114 H   0  0  0  0  0  0  0  0  0  0  0  0
    1.8865    4.4775   -1.4188 H   0  0  0  0  0  0  0  0  0  0  0  0
    1.8091    3.4787   -3.6942 H   0  0  0  0  0  0  0  0  0  0  0  0
    1.3190    1.5661   -5.1975 H   0  0  0  0  0  0  0  0  0  0  0  0
    0.5739   -0.7806   -5.5320 H   0  0  0  0  0  0  0  0  0  0  0  0
   -0.2194   -2.9357   -4.5810 H   0  0  0  0  0  0  0  0  0  0  0  0
   -0.5162   -3.2071   -2.1278 H   0  0  0  0  0  0  0  0  0  0  0  0
   -0.3869   -2.2367    0.1698 H   0  0  0  0  0  0  0  0  0  0  0  0
    0.0836   -0.3631    1.6819 H   0  0  0  0  0  0  0  0  0  0  0  0
  1 40  1  0
  1  6  4  0
  1  2  4  0
  2 11  4  0
  2  3  1  0
  3  7  4  0
  3  4  1  0
  4 10  4  0
  4  5  4  0
  5 42  1  0
  5  6  4  0
  6 41  1  0
  7 13  1  0
  7  8  1  0
  8  9  4  0
  8 16  1  0
  9 44  1  0
  9 10  4  0
 10 43  1  0
 11 39  1  0
 11 12  4  0
 12 38  1  0
 12 13  4  0
 13 14  4  0
 14 37  1  0
 14 15  4  0
 15 36  1  0
 15 16  4  0
 16 17  1  0
 17 35  1  0
 17 34  1  0
 17 20  1  0
 18 29  1  0
 18 21  4  0
 18 19  4  0
 19 20  1  0
 19 24  1  0
 20 25  1  0
 21 30  1  0
 21 22  4  0
 22 26  1  0
 22 23  4  0
 23 27  1  0
 23 24  4  0
 24 28  1  0
 25 32  1  0
 25 33  1  0
 25 31  1  0
M  END
