# Supplementary material for: Spin Orbit Coupling in Orthogonal Charge Transfer States: (TD-)DFT of Pyrene - Dimethylaniline
Source: Preprints.org preprint supplement (doi:10.20944/preprints202112.0109.v2), 2021-12-16
Supplement: Supplementary file 3 [file supplementary › Supporting INFO-14-12-2021/Coordinate files/PyrDMA/PBE/S2/PyrDMA-geometry-PBE-S2-ACN.mol]

S2-ACN
SCM ADF package: www.scm.com

 44 48  0  0  0  0  0  0  0  0999 V2000
    0.4308   -0.9236   -4.4176 C   0  0  0  0  0  0  0  0  0  0  0  0
    0.7325    0.1956   -3.5862 C   0  0  0  0  0  0  0  0  0  0  0  0
    0.5767    0.0726   -2.1609 C   0  0  0  0  0  0  0  0  0  0  0  0
    0.1213   -1.1726   -1.6031 C   0  0  0  0  0  0  0  0  0  0  0  0
   -0.1659   -2.2642   -2.4790 C   0  0  0  0  0  0  0  0  0  0  0  0
   -0.0097   -2.1242   -3.8576 C   0  0  0  0  0  0  0  0  0  0  0  0
    0.8630    1.1882   -1.3047 C   0  0  0  0  0  0  0  0  0  0  0  0
    0.6841    1.0707    0.1253 C   0  0  0  0  0  0  0  0  0  0  0  0
    0.2496   -0.1792    0.6374 C   0  0  0  0  0  0  0  0  0  0  0  0
   -0.0276   -1.2605   -0.1980 C   0  0  0  0  0  0  0  0  0  0  0  0
    1.1771    1.4340   -4.1190 C   0  0  0  0  0  0  0  0  0  0  0  0
    1.4575    2.5137   -3.2956 C   0  0  0  0  0  0  0  0  0  0  0  0
    1.3089    2.4286   -1.8873 C   0  0  0  0  0  0  0  0  0  0  0  0
    1.5659    3.5464   -1.0284 C   0  0  0  0  0  0  0  0  0  0  0  0
    1.3685    3.4331    0.3376 C   0  0  0  0  0  0  0  0  0  0  0  0
    0.9439    2.2336    0.9431 C   0  0  0  0  0  0  0  0  0  0  0  0
    0.5970    2.2501    2.3875 C   0  0  0  0  0  0  0  0  0  0  0  0
    2.2583    0.8296    5.5735 C   0  0  0  0  0  0  0  0  0  0  0  0
    1.3533    1.4971    4.6828 C   0  0  0  0  0  0  0  0  0  0  0  0
    1.6297    1.6237    3.3722 N   0  0  0  0  0  0  0  0  0  0  0  0
    1.9573    0.7052    6.9166 C   0  0  0  0  0  0  0  0  0  0  0  0
    0.7622    1.2328    7.4358 C   0  0  0  0  0  0  0  0  0  0  0  0
   -0.1380    1.8911    6.5786 C   0  0  0  0  0  0  0  0  0  0  0  0
    0.1361    2.0251    5.2321 C   0  0  0  0  0  0  0  0  0  0  0  0
    2.8929    1.1562    2.8244 C   0  0  0  0  0  0  0  0  0  0  0  0
    0.5299    1.1260    8.4957 H   0  0  0  0  0  0  0  0  0  0  0  0
   -1.0683    2.2988    6.9763 H   0  0  0  0  0  0  0  0  0  0  0  0
   -0.5757    2.5343    4.5893 H   0  0  0  0  0  0  0  0  0  0  0  0
    3.1793    0.3997    5.1861 H   0  0  0  0  0  0  0  0  0  0  0  0
    2.6527    0.1844    7.5760 H   0  0  0  0  0  0  0  0  0  0  0  0
    2.9406    0.0604    2.8726 H   0  0  0  0  0  0  0  0  0  0  0  0
    2.9206    1.4608    1.7748 H   0  0  0  0  0  0  0  0  0  0  0  0
    3.7379    1.5861    3.3758 H   0  0  0  0  0  0  0  0  0  0  0  0
   -0.3292    1.7016    2.6051 H   0  0  0  0  0  0  0  0  0  0  0  0
    0.4866    3.2813    2.7492 H   0  0  0  0  0  0  0  0  0  0  0  0
    1.5236    4.3198    0.9636 H   0  0  0  0  0  0  0  0  0  0  0  0
    1.8817    4.4908   -1.4755 H   0  0  0  0  0  0  0  0  0  0  0  0
    1.7912    3.4588   -3.7320 H   0  0  0  0  0  0  0  0  0  0  0  0
    1.2903    1.5224   -5.2033 H   0  0  0  0  0  0  0  0  0  0  0  0
    0.5463   -0.8243   -5.4994 H   0  0  0  0  0  0  0  0  0  0  0  0
   -0.2382   -2.9680   -4.5151 H   0  0  0  0  0  0  0  0  0  0  0  0
   -0.5154   -3.2084   -2.0555 H   0  0  0  0  0  0  0  0  0  0  0  0
   -0.3767   -2.2069    0.2238 H   0  0  0  0  0  0  0  0  0  0  0  0
    0.0996   -0.3103    1.7129 H   0  0  0  0  0  0  0  0  0  0  0  0
  1 40  1  0
  1  6  4  0
  1  2  4  0
  2 11  4  0
  2  3  1  0
  3  7  4  0
  3  4  1  0
  4 10  4  0
  4  5  4  0
  5 42  1  0
  5  6  4  0
  6 41  1  0
  7 13  1  0
  7  8  1  0
  8  9  4  0
  8 16  1  0
  9 44  1  0
  9 10  4  0
 10 43  1  0
 11 39  1  0
 11 12  4  0
 12 38  1  0
 12 13  4  0
 13 14  4  0
 14 37  1  0
 14 15  4  0
 15 36  1  0
 15 16  4  0
 16 17  1  0
 17 34  1  0
 17 35  1  0
 17 20  1  0
 18 29  1  0
 18 21  4  0
 18 19  4  0
 19 20  1  0
 19 24  1  0
 20 25  1  0
 21 30  1  0
 21 22  4  0
 22 26  1  0
 22 23  4  0
 23 27  1  0
 23 24  4  0
 24 28  1  0
 25 32  1  0
 25 33  1  0
 25 31  1  0
M  END
