# Supplementary material for: Spin Orbit Coupling in Orthogonal Charge Transfer States: (TD-)DFT of Pyrene - Dimethylaniline
Source: Preprints.org preprint supplement (doi:10.20944/preprints202112.0109.v2), 2021-12-16
Supplement: Supplementary file 3 [file supplementary › Supporting INFO-14-12-2021/Coordinate files/PyrDMA/PBE/S2/PyrDMA-geometry-PBE-S2-Gas.mol]

S2-Gas
SCM ADF package: www.scm.com

 44 48  0  0  0  0  0  0  0  0999 V2000
    0.4816   -0.7827   -4.5496 C   0  0  0  0  0  0  0  0  0  0  0  0
    0.7744    0.2821   -3.6476 C   0  0  0  0  0  0  0  0  0  0  0  0
    0.5754    0.0790   -2.2373 C   0  0  0  0  0  0  0  0  0  0  0  0
    0.0906   -1.1904   -1.7657 C   0  0  0  0  0  0  0  0  0  0  0  0
   -0.1873   -2.2235   -2.7114 C   0  0  0  0  0  0  0  0  0  0  0  0
    0.0088   -2.0057   -4.0737 C   0  0  0  0  0  0  0  0  0  0  0  0
    0.8503    1.1388   -1.3097 C   0  0  0  0  0  0  0  0  0  0  0  0
    0.6325    0.9409    0.1062 C   0  0  0  0  0  0  0  0  0  0  0  0
    0.1786   -0.3350    0.5317 C   0  0  0  0  0  0  0  0  0  0  0  0
   -0.0900   -1.3592   -0.3731 C   0  0  0  0  0  0  0  0  0  0  0  0
    1.2529    1.5416   -4.0914 C   0  0  0  0  0  0  0  0  0  0  0  0
    1.5222    2.5665   -3.1995 C   0  0  0  0  0  0  0  0  0  0  0  0
    1.3282    2.4038   -1.8040 C   0  0  0  0  0  0  0  0  0  0  0  0
    1.5697    3.4622   -0.8750 C   0  0  0  0  0  0  0  0  0  0  0  0
    1.3270    3.2727    0.4768 C   0  0  0  0  0  0  0  0  0  0  0  0
    0.8735    2.0494    0.9986 C   0  0  0  0  0  0  0  0  0  0  0  0
    0.5022    1.9910    2.4464 C   0  0  0  0  0  0  0  0  0  0  0  0
    2.3695    1.0951    5.6806 C   0  0  0  0  0  0  0  0  0  0  0  0
    1.3386    1.4584    4.7510 C   0  0  0  0  0  0  0  0  0  0  0  0
    1.5364    1.4062    3.4186 N   0  0  0  0  0  0  0  0  0  0  0  0
    2.1614    1.2157    7.0382 C   0  0  0  0  0  0  0  0  0  0  0  0
    0.9312    1.6754    7.5361 C   0  0  0  0  0  0  0  0  0  0  0  0
   -0.0973    2.0238    6.6437 C   0  0  0  0  0  0  0  0  0  0  0  0
    0.0882    1.9234    5.2825 C   0  0  0  0  0  0  0  0  0  0  0  0
    2.7317    0.8224    2.8233 C   0  0  0  0  0  0  0  0  0  0  0  0
    0.7729    1.7588    8.6107 H   0  0  0  0  0  0  0  0  0  0  0  0
   -1.0571    2.3695    7.0273 H   0  0  0  0  0  0  0  0  0  0  0  0
   -0.7262    2.1740    4.6108 H   0  0  0  0  0  0  0  0  0  0  0  0
    3.3372    0.7626    5.3162 H   0  0  0  0  0  0  0  0  0  0  0  0
    2.9642    0.9551    7.7274 H   0  0  0  0  0  0  0  0  0  0  0  0
    3.1861    0.0852    3.4871 H   0  0  0  0  0  0  0  0  0  0  0  0
    2.4428    0.3507    1.8802 H   0  0  0  0  0  0  0  0  0  0  0  0
    3.4465    1.6222    2.5868 H   0  0  0  0  0  0  0  0  0  0  0  0
   -0.3977    1.3813    2.6062 H   0  0  0  0  0  0  0  0  0  0  0  0
    0.3055    2.9999    2.8302 H   0  0  0  0  0  0  0  0  0  0  0  0
    1.4761    4.1159    1.1611 H   0  0  0  0  0  0  0  0  0  0  0  0
    1.9153    4.4286   -1.2474 H   0  0  0  0  0  0  0  0  0  0  0  0
    1.8843    3.5305   -3.5675 H   0  0  0  0  0  0  0  0  0  0  0  0
    1.4037    1.6940   -5.1641 H   0  0  0  0  0  0  0  0  0  0  0  0
    0.6302   -0.6245   -5.6206 H   0  0  0  0  0  0  0  0  0  0  0  0
   -0.2128   -2.8077   -4.7842 H   0  0  0  0  0  0  0  0  0  0  0  0
   -0.5596   -3.1859   -2.3524 H   0  0  0  0  0  0  0  0  0  0  0  0
   -0.4534   -2.3238   -0.0076 H   0  0  0  0  0  0  0  0  0  0  0  0
    0.0080   -0.5296    1.5943 H   0  0  0  0  0  0  0  0  0  0  0  0
  1 40  1  0
  1  6  4  0
  1  2  4  0
  2 11  4  0
  2  3  1  0
  3  7  4  0
  3  4  1  0
  4 10  4  0
  4  5  4  0
  5 42  1  0
  5  6  4  0
  6 41  1  0
  7 13  1  0
  7  8  1  0
  8  9  4  0
  8 16  1  0
  9 44  1  0
  9 10  4  0
 10 43  1  0
 11 39  1  0
 11 12  4  0
 12 38  1  0
 12 13  4  0
 13 14  4  0
 14 37  1  0
 14 15  4  0
 15 36  1  0
 15 16  4  0
 16 17  1  0
 17 35  1  0
 17 34  1  0
 17 20  1  0
 18 29  1  0
 18 21  4  0
 18 19  4  0
 19 20  1  0
 19 24  1  0
 20 25  1  0
 21 30  1  0
 21 22  4  0
 22 26  1  0
 22 23  4  0
 23 27  1  0
 23 24  4  0
 24 28  1  0
 25 31  1  0
 25 32  1  0
 25 33  1  0
M  END
