# Supplementary material for: Spin Orbit Coupling in Orthogonal Charge Transfer States: (TD-)DFT of Pyrene - Dimethylaniline
Source: Preprints.org preprint supplement (doi:10.20944/preprints202112.0109.v2), 2021-12-16
Supplement: Supplementary file 3 [file supplementary › Supporting INFO-14-12-2021/Coordinate files/PyrDMA/PBE/S2/PyrDMA-geometry-PBE-S2-Hexane.mol]

S2-Hexane
SCM ADF package: www.scm.com

 44 48  0  0  0  0  0  0  0  0999 V2000
    0.4414   -0.9104   -4.4322 C   0  0  0  0  0  0  0  0  0  0  0  0
    0.7362    0.2058   -3.5952 C   0  0  0  0  0  0  0  0  0  0  0  0
    0.5772    0.0741   -2.1712 C   0  0  0  0  0  0  0  0  0  0  0  0
    0.1265   -1.1758   -1.6207 C   0  0  0  0  0  0  0  0  0  0  0  0
   -0.1540   -2.2634   -2.5029 C   0  0  0  0  0  0  0  0  0  0  0  0
    0.0049   -2.1153   -3.8796 C   0  0  0  0  0  0  0  0  0  0  0  0
    0.8582    1.1851   -1.3079 C   0  0  0  0  0  0  0  0  0  0  0  0
    0.6795    1.0582    0.1207 C   0  0  0  0  0  0  0  0  0  0  0  0
    0.2509   -0.1963    0.6248 C   0  0  0  0  0  0  0  0  0  0  0  0
   -0.0213   -1.2725   -0.2168 C   0  0  0  0  0  0  0  0  0  0  0  0
    1.1783    1.4485   -4.1181 C   0  0  0  0  0  0  0  0  0  0  0  0
    1.4534    2.5236   -3.2876 C   0  0  0  0  0  0  0  0  0  0  0  0
    1.3021    2.4298   -1.8809 C   0  0  0  0  0  0  0  0  0  0  0  0
    1.5560    3.5395   -1.0135 C   0  0  0  0  0  0  0  0  0  0  0  0
    1.3579    3.4166    0.3520 C   0  0  0  0  0  0  0  0  0  0  0  0
    0.9347    2.2141    0.9492 C   0  0  0  0  0  0  0  0  0  0  0  0
    0.5899    2.2210    2.3988 C   0  0  0  0  0  0  0  0  0  0  0  0
    2.2580    0.8386    5.5846 C   0  0  0  0  0  0  0  0  0  0  0  0
    1.3448    1.4908    4.6903 C   0  0  0  0  0  0  0  0  0  0  0  0
    1.6159    1.5984    3.3764 N   0  0  0  0  0  0  0  0  0  0  0  0
    1.9713    0.7424    6.9309 C   0  0  0  0  0  0  0  0  0  0  0  0
    0.7821    1.2831    7.4495 C   0  0  0  0  0  0  0  0  0  0  0  0
   -0.1278    1.9236    6.5895 C   0  0  0  0  0  0  0  0  0  0  0  0
    0.1319    2.0292    5.2395 C   0  0  0  0  0  0  0  0  0  0  0  0
    2.8765    1.1191    2.8258 C   0  0  0  0  0  0  0  0  0  0  0  0
    0.5622    1.2012    8.5137 H   0  0  0  0  0  0  0  0  0  0  0  0
   -1.0522    2.3414    6.9889 H   0  0  0  0  0  0  0  0  0  0  0  0
   -0.5847    2.5254    4.5927 H   0  0  0  0  0  0  0  0  0  0  0  0
    3.1750    0.4033    5.1950 H   0  0  0  0  0  0  0  0  0  0  0  0
    2.6735    0.2368    7.5941 H   0  0  0  0  0  0  0  0  0  0  0  0
    2.9154    0.0232    2.8731 H   0  0  0  0  0  0  0  0  0  0  0  0
    2.9081    1.4268    1.7772 H   0  0  0  0  0  0  0  0  0  0  0  0
    3.7226    1.5461    3.3768 H   0  0  0  0  0  0  0  0  0  0  0  0
   -0.3386    1.6720    2.6054 H   0  0  0  0  0  0  0  0  0  0  0  0
    0.4718    3.2518    2.7582 H   0  0  0  0  0  0  0  0  0  0  0  0
    1.5160    4.2965    0.9862 H   0  0  0  0  0  0  0  0  0  0  0  0
    1.8744    4.4890   -1.4482 H   0  0  0  0  0  0  0  0  0  0  0  0
    1.7872    3.4726   -3.7160 H   0  0  0  0  0  0  0  0  0  0  0  0
    1.2959    1.5461   -5.2012 H   0  0  0  0  0  0  0  0  0  0  0  0
    0.5599   -0.8064   -5.5134 H   0  0  0  0  0  0  0  0  0  0  0  0
   -0.2175   -2.9577   -4.5411 H   0  0  0  0  0  0  0  0  0  0  0  0
   -0.4988   -3.2116   -2.0843 H   0  0  0  0  0  0  0  0  0  0  0  0
   -0.3625   -2.2221    0.2047 H   0  0  0  0  0  0  0  0  0  0  0  0
    0.1089   -0.3349    1.7002 H   0  0  0  0  0  0  0  0  0  0  0  0
  1 40  1  0
  1  6  4  0
  1  2  4  0
  2 11  4  0
  2  3  1  0
  3  7  4  0
  3  4  1  0
  4 10  4  0
  4  5  4  0
  5 42  1  0
  5  6  4  0
  6 41  1  0
  7 13  1  0
  7  8  1  0
  8  9  4  0
  8 16  1  0
  9 44  1  0
  9 10  4  0
 10 43  1  0
 11 39  1  0
 11 12  4  0
 12 38  1  0
 12 13  4  0
 13 14  4  0
 14 37  1  0
 14 15  4  0
 15 36  1  0
 15 16  4  0
 16 17  1  0
 17 35  1  0
 17 34  1  0
 17 20  1  0
 18 29  1  0
 18 21  4  0
 18 19  4  0
 19 20  1  0
 19 24  1  0
 20 25  1  0
 21 30  1  0
 21 22  4  0
 22 26  1  0
 22 23  4  0
 23 27  1  0
 23 24  4  0
 24 28  1  0
 25 32  1  0
 25 33  1  0
 25 31  1  0
M  END
