# Supplementary material for: Spin Orbit Coupling in Orthogonal Charge Transfer States: (TD-)DFT of Pyrene - Dimethylaniline
Source: Preprints.org preprint supplement (doi:10.20944/preprints202112.0109.v2), 2021-12-16
Supplement: Supplementary file 3 [file supplementary › Supporting INFO-14-12-2021/Coordinate files/PyrDMA/PBE/T1/PyrDMA-geometry-PBE-T1-ACN.mol]

T1-ACN
SCM ADF package: www.scm.com

 44 48  0  0  0  0  0  0  0  0999 V2000
    0.3988   -1.3758   -3.7045 C   0  0  0  0  0  0  0  0  0  0  0  0
    0.7699   -0.1130   -3.1187 C   0  0  0  0  0  0  0  0  0  0  0  0
    0.5430    0.0973   -1.7161 C   0  0  0  0  0  0  0  0  0  0  0  0
   -0.0503   -0.9441   -0.9286 C   0  0  0  0  0  0  0  0  0  0  0  0
   -0.4024   -2.1872   -1.5637 C   0  0  0  0  0  0  0  0  0  0  0  0
   -0.1737   -2.3794   -2.9259 C   0  0  0  0  0  0  0  0  0  0  0  0
    0.9018    1.3395   -1.1084 C   0  0  0  0  0  0  0  0  0  0  0  0
    0.6713    1.5517    0.2965 C   0  0  0  0  0  0  0  0  0  0  0  0
    0.0830    0.5118    1.0369 C   0  0  0  0  0  0  0  0  0  0  0  0
   -0.2691   -0.7100    0.4392 C   0  0  0  0  0  0  0  0  0  0  0  0
    1.3466    0.9202   -3.8774 C   0  0  0  0  0  0  0  0  0  0  0  0
    1.6955    2.1436   -3.2831 C   0  0  0  0  0  0  0  0  0  0  0  0
    1.4836    2.3738   -1.9146 C   0  0  0  0  0  0  0  0  0  0  0  0
    1.8231    3.6292   -1.2908 C   0  0  0  0  0  0  0  0  0  0  0  0
    1.5995    3.8255    0.0641 C   0  0  0  0  0  0  0  0  0  0  0  0
    1.0329    2.8389    0.8825 C   0  0  0  0  0  0  0  0  0  0  0  0
    0.8206    3.1285    2.3455 C   0  0  0  0  0  0  0  0  0  0  0  0
    2.2316    0.5898    4.7966 C   0  0  0  0  0  0  0  0  0  0  0  0
    1.3160    1.4990    4.1994 C   0  0  0  0  0  0  0  0  0  0  0  0
    1.7408    2.3696    3.2126 N   0  0  0  0  0  0  0  0  0  0  0  0
    1.8279   -0.2675    5.8188 C   0  0  0  0  0  0  0  0  0  0  0  0
    0.5073   -0.2690    6.2818 C   0  0  0  0  0  0  0  0  0  0  0  0
   -0.4072    0.6176    5.6982 C   0  0  0  0  0  0  0  0  0  0  0  0
   -0.0220    1.4863    4.6805 C   0  0  0  0  0  0  0  0  0  0  0  0
    3.1616    2.4802    2.9060 C   0  0  0  0  0  0  0  0  0  0  0  0
    0.1956   -0.9465    7.0783 H   0  0  0  0  0  0  0  0  0  0  0  0
   -1.4426    0.6417    6.0454 H   0  0  0  0  0  0  0  0  0  0  0  0
   -0.7658    2.1732    4.2786 H   0  0  0  0  0  0  0  0  0  0  0  0
    3.2640    0.5490    4.4528 H   0  0  0  0  0  0  0  0  0  0  0  0
    2.5605   -0.9521    6.2522 H   0  0  0  0  0  0  0  0  0  0  0  0
    3.5543    1.5970    2.3749 H   0  0  0  0  0  0  0  0  0  0  0  0
    3.3148    3.3553    2.2654 H   0  0  0  0  0  0  0  0  0  0  0  0
    3.7399    2.6183    3.8305 H   0  0  0  0  0  0  0  0  0  0  0  0
   -0.2096    2.8954    2.6367 H   0  0  0  0  0  0  0  0  0  0  0  0
    0.9689    4.2060    2.5254 H   0  0  0  0  0  0  0  0  0  0  0  0
    1.8609    4.7882    0.5125 H   0  0  0  0  0  0  0  0  0  0  0  0
    2.2492    4.4253   -1.9046 H   0  0  0  0  0  0  0  0  0  0  0  0
    2.1375    2.9359   -3.8918 H   0  0  0  0  0  0  0  0  0  0  0  0
    1.5207    0.7647   -4.9447 H   0  0  0  0  0  0  0  0  0  0  0  0
    0.5767   -1.5318   -4.7705 H   0  0  0  0  0  0  0  0  0  0  0  0
   -0.4475   -3.3303   -3.3889 H   0  0  0  0  0  0  0  0  0  0  0  0
   -0.8527   -2.9769   -0.9587 H   0  0  0  0  0  0  0  0  0  0  0  0
   -0.7224   -1.4958    1.0480 H   0  0  0  0  0  0  0  0  0  0  0  0
   -0.1106    0.6415    2.1018 H   0  0  0  0  0  0  0  0  0  0  0  0
  1 40  1  0
  1  6  4  0
  1  2  1  0
  2 11  4  0
  2  3  1  0
  3  7  4  0
  3  4  4  0
  4 10  4  0
  4  5  1  0
  5 42  1  0
  5  6  4  0
  6 41  1  0
  7 13  4  0
  7  8  1  0
  8  9  4  0
  8 16  1  0
  9 44  1  0
  9 10  4  0
 10 43  1  0
 11 39  1  0
 11 12  4  0
 12 38  1  0
 12 13  4  0
 13 14  1  0
 14 37  1  0
 14 15  4  0
 15 36  1  0
 15 16  4  0
 16 17  1  0
 17 34  1  0
 17 35  1  0
 17 20  1  0
 18 29  1  0
 18 21  4  0
 18 19  4  0
 19 20  1  0
 19 24  4  0
 20 25  1  0
 21 30  1  0
 21 22  4  0
 22 26  1  0
 22 23  4  0
 23 27  1  0
 23 24  4  0
 24 28  1  0
 25 32  1  0
 25 33  1  0
 25 31  1  0
M  END
