# Supplementary material for: Spin Orbit Coupling in Orthogonal Charge Transfer States: (TD-)DFT of Pyrene - Dimethylaniline
Source: Preprints.org preprint supplement (doi:10.20944/preprints202112.0109.v2), 2021-12-16
Supplement: Supplementary file 3 [file supplementary › Supporting INFO-14-12-2021/Coordinate files/PyrDMA/PBE/T1/PyrDMA-geometry-PBE-T1-Gas.mol]

T1-Gas
SCM ADF package: www.scm.com

 44 48  0  0  0  0  0  0  0  0999 V2000
    0.4210   -1.2763   -3.8858 C   0  0  0  0  0  0  0  0  0  0  0  0
    0.7388   -0.0212   -3.2542 C   0  0  0  0  0  0  0  0  0  0  0  0
    0.5777    0.1017   -1.8334 C   0  0  0  0  0  0  0  0  0  0  0  0
    0.1032   -1.0163   -1.0730 C   0  0  0  0  0  0  0  0  0  0  0  0
   -0.2000   -2.2467   -1.7555 C   0  0  0  0  0  0  0  0  0  0  0  0
   -0.0382   -2.3544   -3.1351 C   0  0  0  0  0  0  0  0  0  0  0  0
    0.8848    1.3327   -1.1804 C   0  0  0  0  0  0  0  0  0  0  0  0
    0.7240    1.4544    0.2427 C   0  0  0  0  0  0  0  0  0  0  0  0
    0.2592    0.3402    0.9590 C   0  0  0  0  0  0  0  0  0  0  0  0
   -0.0486   -0.8697    0.3140 C   0  0  0  0  0  0  0  0  0  0  0  0
    1.2004    1.0852   -3.9839 C   0  0  0  0  0  0  0  0  0  0  0  0
    1.4985    2.2990   -3.3432 C   0  0  0  0  0  0  0  0  0  0  0  0
    1.3484    2.4445   -1.9573 C   0  0  0  0  0  0  0  0  0  0  0  0
    1.6383    3.6862   -1.2833 C   0  0  0  0  0  0  0  0  0  0  0  0
    1.4801    3.7977    0.0902 C   0  0  0  0  0  0  0  0  0  0  0  0
    1.0337    2.7313    0.8798 C   0  0  0  0  0  0  0  0  0  0  0  0
    0.8510    2.9262    2.3588 C   0  0  0  0  0  0  0  0  0  0  0  0
    2.0890    0.4391    4.9291 C   0  0  0  0  0  0  0  0  0  0  0  0
    1.3147    1.4676    4.3330 C   0  0  0  0  0  0  0  0  0  0  0  0
    1.7537    2.1055    3.1831 N   0  0  0  0  0  0  0  0  0  0  0  0
    1.6641   -0.1909    6.0975 C   0  0  0  0  0  0  0  0  0  0  0  0
    0.4605    0.1642    6.7125 C   0  0  0  0  0  0  0  0  0  0  0  0
   -0.3127    1.1767    6.1342 C   0  0  0  0  0  0  0  0  0  0  0  0
    0.0982    1.8232    4.9713 C   0  0  0  0  0  0  0  0  0  0  0  0
    3.1071    1.8793    2.7046 C   0  0  0  0  0  0  0  0  0  0  0  0
    0.1314   -0.3356    7.6247 H   0  0  0  0  0  0  0  0  0  0  0  0
   -1.2518    1.4808    6.6020 H   0  0  0  0  0  0  0  0  0  0  0  0
   -0.5185    2.6301    4.5767 H   0  0  0  0  0  0  0  0  0  0  0  0
    3.0226    0.1213    4.4671 H   0  0  0  0  0  0  0  0  0  0  0  0
    2.2849   -0.9807    6.5264 H   0  0  0  0  0  0  0  0  0  0  0  0
    3.2400    0.8779    2.2566 H   0  0  0  0  0  0  0  0  0  0  0  0
    3.3369    2.6201    1.9305 H   0  0  0  0  0  0  0  0  0  0  0  0
    3.8267    1.9930    3.5291 H   0  0  0  0  0  0  0  0  0  0  0  0
   -0.1803    2.6541    2.6297 H   0  0  0  0  0  0  0  0  0  0  0  0
    0.9750    3.9977    2.6017 H   0  0  0  0  0  0  0  0  0  0  0  0
    1.7027    4.7512    0.5779 H   0  0  0  0  0  0  0  0  0  0  0  0
    1.9777    4.5397   -1.8735 H   0  0  0  0  0  0  0  0  0  0  0  0
    1.8519    3.1498   -3.9306 H   0  0  0  0  0  0  0  0  0  0  0  0
    1.3245    0.9962   -5.0656 H   0  0  0  0  0  0  0  0  0  0  0  0
    0.5482   -1.3658   -4.9665 H   0  0  0  0  0  0  0  0  0  0  0  0
   -0.2738   -3.2974   -3.6335 H   0  0  0  0  0  0  0  0  0  0  0  0
   -0.5602   -3.0955   -1.1707 H   0  0  0  0  0  0  0  0  0  0  0  0
   -0.4091   -1.7160    0.9032 H   0  0  0  0  0  0  0  0  0  0  0  0
    0.1376    0.3999    2.0410 H   0  0  0  0  0  0  0  0  0  0  0  0
  1 40  1  0
  1  6  4  0
  1  2  1  0
  2 11  4  0
  2  3  4  0
  3  7  4  0
  3  4  1  0
  4 10  4  0
  4  5  1  0
  5 42  1  0
  5  6  4  0
  6 41  1  0
  7 13  4  0
  7  8  1  0
  8  9  4  0
  8 16  1  0
  9 44  1  0
  9 10  4  0
 10 43  1  0
 11 39  1  0
 11 12  4  0
 12 38  1  0
 12 13  4  0
 13 14  1  0
 14 37  1  0
 14 15  4  0
 15 36  1  0
 15 16  4  0
 16 17  1  0
 17 34  1  0
 17 35  1  0
 17 20  1  0
 18 29  1  0
 18 21  4  0
 18 19  4  0
 19 20  1  0
 19 24  4  0
 20 25  1  0
 21 30  1  0
 21 22  4  0
 22 26  1  0
 22 23  4  0
 23 27  1  0
 23 24  4  0
 24 28  1  0
 25 32  1  0
 25 33  1  0
 25 31  1  0
M  END
