# Supplementary material for: Spin Orbit Coupling in Orthogonal Charge Transfer States: (TD-)DFT of Pyrene - Dimethylaniline
Source: Preprints.org preprint supplement (doi:10.20944/preprints202112.0109.v2), 2021-12-16
Supplement: Supplementary file 3 [file supplementary › Supporting INFO-14-12-2021/Coordinate files/PyrDMA/PBE/T1/PyrDMA-geometry-PBE-T1-Hexane.mol]

T1-geometry
SCM ADF package: www.scm.com

 44 48  0  0  0  0  0  0  0  0999 V2000
    0.4189   -1.2978   -3.8485 C   0  0  0  0  0  0  0  0  0  0  0  0
    0.7431   -0.0386   -3.2278 C   0  0  0  0  0  0  0  0  0  0  0  0
    0.5736    0.1011   -1.8093 C   0  0  0  0  0  0  0  0  0  0  0  0
    0.0834   -1.0044   -1.0400 C   0  0  0  0  0  0  0  0  0  0  0  0
   -0.2258   -2.2400   -1.7111 C   0  0  0  0  0  0  0  0  0  0  0  0
   -0.0549   -2.3639   -3.0888 C   0  0  0  0  0  0  0  0  0  0  0  0
    0.8874    1.3367   -1.1672 C   0  0  0  0  0  0  0  0  0  0  0  0
    0.7182    1.4756    0.2538 C   0  0  0  0  0  0  0  0  0  0  0  0
    0.2358    0.3735    0.9781 C   0  0  0  0  0  0  0  0  0  0  0  0
   -0.0780   -0.8410    0.3446 C   0  0  0  0  0  0  0  0  0  0  0  0
    1.2193    1.0562   -3.9669 C   0  0  0  0  0  0  0  0  0  0  0  0
    1.5234    2.2746   -3.3374 C   0  0  0  0  0  0  0  0  0  0  0  0
    1.3657    2.4361   -1.9535 C   0  0  0  0  0  0  0  0  0  0  0  0
    1.6621    3.6830   -1.2914 C   0  0  0  0  0  0  0  0  0  0  0  0
    1.4977    3.8101    0.0801 C   0  0  0  0  0  0  0  0  0  0  0  0
    1.0360    2.7565    0.8789 C   0  0  0  0  0  0  0  0  0  0  0  0
    0.8542    2.9699    2.3562 C   0  0  0  0  0  0  0  0  0  0  0  0
    2.1057    0.4470    4.8882 C   0  0  0  0  0  0  0  0  0  0  0  0
    1.3142    1.4716    4.3060 C   0  0  0  0  0  0  0  0  0  0  0  0
    1.7584    2.1540    3.1852 N   0  0  0  0  0  0  0  0  0  0  0  0
    1.6785   -0.2255    6.0321 C   0  0  0  0  0  0  0  0  0  0  0  0
    0.4553    0.0814    6.6360 C   0  0  0  0  0  0  0  0  0  0  0  0
   -0.3358    1.0887    6.0706 C   0  0  0  0  0  0  0  0  0  0  0  0
    0.0769    1.7767    4.9321 C   0  0  0  0  0  0  0  0  0  0  0  0
    3.1279    1.9781    2.7277 C   0  0  0  0  0  0  0  0  0  0  0  0
    0.1246   -0.4511    7.5290 H   0  0  0  0  0  0  0  0  0  0  0  0
   -1.2904    1.3552    6.5296 H   0  0  0  0  0  0  0  0  0  0  0  0
   -0.5564    2.5758    4.5480 H   0  0  0  0  0  0  0  0  0  0  0  0
    3.0553    0.1664    4.4345 H   0  0  0  0  0  0  0  0  0  0  0  0
    2.3131   -1.0101    6.4504 H   0  0  0  0  0  0  0  0  0  0  0  0
    3.2959    0.9974    2.2482 H   0  0  0  0  0  0  0  0  0  0  0  0
    3.3551    2.7534    1.9875 H   0  0  0  0  0  0  0  0  0  0  0  0
    3.8265    2.0797    3.5710 H   0  0  0  0  0  0  0  0  0  0  0  0
   -0.1772    2.7100    2.6340 H   0  0  0  0  0  0  0  0  0  0  0  0
    0.9892    4.0418    2.5869 H   0  0  0  0  0  0  0  0  0  0  0  0
    1.7270    4.7664    0.5589 H   0  0  0  0  0  0  0  0  0  0  0  0
    2.0117    4.5273   -1.8889 H   0  0  0  0  0  0  0  0  0  0  0  0
    1.8876    3.1160   -3.9315 H   0  0  0  0  0  0  0  0  0  0  0  0
    1.3498    0.9544   -5.0467 H   0  0  0  0  0  0  0  0  0  0  0  0
    0.5531   -1.4001   -4.9272 H   0  0  0  0  0  0  0  0  0  0  0  0
   -0.2949   -3.3104   -3.5786 H   0  0  0  0  0  0  0  0  0  0  0  0
   -0.5974   -3.0793   -1.1198 H   0  0  0  0  0  0  0  0  0  0  0  0
   -0.4514   -1.6773    0.9399 H   0  0  0  0  0  0  0  0  0  0  0  0
    0.1037    0.4467    2.0580 H   0  0  0  0  0  0  0  0  0  0  0  0
  1 40  1  0
  1  6  4  0
  1  2  1  0
  2 11  4  0
  2  3  4  0
  3  7  4  0
  3  4  1  0
  4 10  4  0
  4  5  1  0
  5 42  1  0
  5  6  4  0
  6 41  1  0
  7 13  4  0
  7  8  1  0
  8  9  4  0
  8 16  1  0
  9 44  1  0
  9 10  4  0
 10 43  1  0
 11 39  1  0
 11 12  4  0
 12 38  1  0
 12 13  4  0
 13 14  1  0
 14 37  1  0
 14 15  4  0
 15 36  1  0
 15 16  4  0
 16 17  1  0
 17 34  1  0
 17 35  1  0
 17 20  1  0
 18 29  1  0
 18 21  4  0
 18 19  4  0
 19 20  1  0
 19 24  4  0
 20 25  1  0
 21 30  1  0
 21 22  4  0
 22 26  1  0
 22 23  4  0
 23 27  1  0
 23 24  4  0
 24 28  1  0
 25 32  1  0
 25 33  1  0
 25 31  1  0
M  END
