# Supplementary material for: Spin Orbit Coupling in Orthogonal Charge Transfer States: (TD-)DFT of Pyrene - Dimethylaniline
Source: Preprints.org preprint supplement (doi:10.20944/preprints202112.0109.v2), 2021-12-16
Supplement: Supplementary file 3 [file supplementary › Supporting INFO-14-12-2021/Coordinate files/PyrDMA/PBE/T2/PyrDMA-geometry-PBE-T2-ACN.mol]

T2-ACN
SCM ADF package: www.scm.com

 44 48  0  0  0  0  0  0  0  0999 V2000
    0.2696   -1.0860   -4.2013 C   0  0  0  0  0  0  0  0  0  0  0  0
    0.6517    0.0909   -3.4563 C   0  0  0  0  0  0  0  0  0  0  0  0
    0.5458    0.0817   -2.0227 C   0  0  0  0  0  0  0  0  0  0  0  0
    0.0620   -1.0914   -1.3567 C   0  0  0  0  0  0  0  0  0  0  0  0
   -0.3060   -2.2386   -2.1513 C   0  0  0  0  0  0  0  0  0  0  0  0
   -0.1992   -2.2172   -3.5424 C   0  0  0  0  0  0  0  0  0  0  0  0
    0.9071    1.2375   -1.2673 C   0  0  0  0  0  0  0  0  0  0  0  0
    0.7807    1.2351    0.1675 C   0  0  0  0  0  0  0  0  0  0  0  0
    0.3228    0.0618    0.7877 C   0  0  0  0  0  0  0  0  0  0  0  0
   -0.0398   -1.0777    0.0448 C   0  0  0  0  0  0  0  0  0  0  0  0
    1.1187    1.2458   -4.1012 C   0  0  0  0  0  0  0  0  0  0  0  0
    1.4768    2.3839   -3.3572 C   0  0  0  0  0  0  0  0  0  0  0  0
    1.3771    2.4004   -1.9573 C   0  0  0  0  0  0  0  0  0  0  0  0
    1.7179    3.5725   -1.1901 C   0  0  0  0  0  0  0  0  0  0  0  0
    1.5753    3.5747    0.1946 C   0  0  0  0  0  0  0  0  0  0  0  0
    1.1116    2.4598    0.8978 C   0  0  0  0  0  0  0  0  0  0  0  0
    0.8316    2.5844    2.3715 C   0  0  0  0  0  0  0  0  0  0  0  0
    2.2636    0.9252    5.4797 C   0  0  0  0  0  0  0  0  0  0  0  0
    1.3532    1.4848    4.5318 C   0  0  0  0  0  0  0  0  0  0  0  0
    1.7456    1.8242    3.2620 N   0  0  0  0  0  0  0  0  0  0  0  0
    1.8329    0.4733    6.7241 C   0  0  0  0  0  0  0  0  0  0  0  0
    0.4932    0.5804    7.1191 C   0  0  0  0  0  0  0  0  0  0  0  0
   -0.4049    1.1816    6.2265 C   0  0  0  0  0  0  0  0  0  0  0  0
    0.0029    1.6387    4.9778 C   0  0  0  0  0  0  0  0  0  0  0  0
    3.1667    1.9158    2.9485 C   0  0  0  0  0  0  0  0  0  0  0  0
    0.1620    0.2238    8.0956 H   0  0  0  0  0  0  0  0  0  0  0  0
   -1.4543    1.3067    6.5064 H   0  0  0  0  0  0  0  0  0  0  0  0
   -0.7396    2.1100    4.3382 H   0  0  0  0  0  0  0  0  0  0  0  0
    3.3163    0.8135    5.2262 H   0  0  0  0  0  0  0  0  0  0  0  0
    2.5668    0.0278    7.4005 H   0  0  0  0  0  0  0  0  0  0  0  0
    3.7214    1.0481    3.3193 H   0  0  0  0  0  0  0  0  0  0  0  0
    3.2877    1.9324    1.8627 H   0  0  0  0  0  0  0  0  0  0  0  0
    3.6224    2.8399    3.3553 H   0  0  0  0  0  0  0  0  0  0  0  0
   -0.1873    2.2202    2.5497 H   0  0  0  0  0  0  0  0  0  0  0  0
    0.8607    3.6562    2.6470 H   0  0  0  0  0  0  0  0  0  0  0  0
    1.8032    4.4995    0.7333 H   0  0  0  0  0  0  0  0  0  0  0  0
    2.0584    4.4602   -1.7261 H   0  0  0  0  0  0  0  0  0  0  0  0
    1.8313    3.2731   -3.8830 H   0  0  0  0  0  0  0  0  0  0  0  0
    1.1977    1.2574   -5.1902 H   0  0  0  0  0  0  0  0  0  0  0  0
    0.3551   -1.0619   -5.2893 H   0  0  0  0  0  0  0  0  0  0  0  0
   -0.4866   -3.0961   -4.1238 H   0  0  0  0  0  0  0  0  0  0  0  0
   -0.6771   -3.1303   -1.6431 H   0  0  0  0  0  0  0  0  0  0  0  0
   -0.4104   -1.9744    0.5459 H   0  0  0  0  0  0  0  0  0  0  0  0
    0.2344    0.0239    1.8748 H   0  0  0  0  0  0  0  0  0  0  0  0
  1 40  1  0
  1  6  4  0
  1  2  1  0
  2 11  4  0
  2  3  1  0
  3  7  4  0
  3  4  4  0
  4 10  4  0
  4  5  1  0
  5 42  1  0
  5  6  4  0
  6 41  1  0
  7 13  4  0
  7  8  1  0
  8  9  4  0
  8 16  1  0
  9 44  1  0
  9 10  4  0
 10 43  1  0
 11 39  1  0
 11 12  4  0
 12 38  1  0
 12 13  4  0
 13 14  1  0
 14 37  1  0
 14 15  4  0
 15 36  1  0
 15 16  4  0
 16 17  1  0
 17 34  1  0
 17 35  1  0
 17 20  1  0
 18 29  1  0
 18 21  4  0
 18 19  4  0
 19 20  1  0
 19 24  4  0
 20 25  1  0
 21 30  1  0
 21 22  4  0
 22 26  1  0
 22 23  4  0
 23 27  1  0
 23 24  4  0
 24 28  1  0
 25 32  1  0
 25 31  1  0
 25 33  1  0
M  END
