# Supplementary material for: Spin Orbit Coupling in Orthogonal Charge Transfer States: (TD-)DFT of Pyrene - Dimethylaniline
Source: Preprints.org preprint supplement (doi:10.20944/preprints202112.0109.v2), 2021-12-16
Supplement: Supplementary file 3 [file supplementary › Supporting INFO-14-12-2021/Coordinate files/PyrDMA/PBE/T2/PyrDMA-geometry-PBE-T2-Gas.mol]

T2-Gas
SCM ADF package: www.scm.com

 44 48  0  0  0  0  0  0  0  0999 V2000
    0.3492   -1.1052   -4.1745 C   0  0  0  0  0  0  0  0  0  0  0  0
    0.6861    0.0929   -3.4458 C   0  0  0  0  0  0  0  0  0  0  0  0
    0.5509    0.0980   -2.0176 C   0  0  0  0  0  0  0  0  0  0  0  0
    0.0828   -1.0761   -1.3434 C   0  0  0  0  0  0  0  0  0  0  0  0
   -0.2412   -2.2462   -2.1219 C   0  0  0  0  0  0  0  0  0  0  0  0
   -0.1051   -2.2398   -3.5079 C   0  0  0  0  0  0  0  0  0  0  0  0
    0.8764    1.2687   -1.2706 C   0  0  0  0  0  0  0  0  0  0  0  0
    0.7421    1.2723    0.1600 C   0  0  0  0  0  0  0  0  0  0  0  0
    0.2868    0.1058    0.7922 C   0  0  0  0  0  0  0  0  0  0  0  0
   -0.0456   -1.0436    0.0521 C   0  0  0  0  0  0  0  0  0  0  0  0
    1.1421    1.2525   -4.0887 C   0  0  0  0  0  0  0  0  0  0  0  0
    1.4623    2.4088   -3.3537 C   0  0  0  0  0  0  0  0  0  0  0  0
    1.3366    2.4391   -1.9589 C   0  0  0  0  0  0  0  0  0  0  0  0
    1.6509    3.6168   -1.1869 C   0  0  0  0  0  0  0  0  0  0  0  0
    1.5143    3.6157    0.1939 C   0  0  0  0  0  0  0  0  0  0  0  0
    1.0693    2.4920    0.8985 C   0  0  0  0  0  0  0  0  0  0  0  0
    0.8489    2.5873    2.3833 C   0  0  0  0  0  0  0  0  0  0  0  0
    2.2231    0.7730    5.3970 C   0  0  0  0  0  0  0  0  0  0  0  0
    1.3258    1.4200    4.5118 C   0  0  0  0  0  0  0  0  0  0  0  0
    1.7003    1.7067    3.2006 N   0  0  0  0  0  0  0  0  0  0  0  0
    1.8272    0.4048    6.6811 C   0  0  0  0  0  0  0  0  0  0  0  0
    0.5425    0.6872    7.1555 C   0  0  0  0  0  0  0  0  0  0  0  0
   -0.3359    1.3712    6.3130 C   0  0  0  0  0  0  0  0  0  0  0  0
    0.0424    1.7448    5.0239 C   0  0  0  0  0  0  0  0  0  0  0  0
    3.1076    1.6522    2.8414 C   0  0  0  0  0  0  0  0  0  0  0  0
    0.2441    0.4084    8.1670 H   0  0  0  0  0  0  0  0  0  0  0  0
   -1.3329    1.6436    6.6672 H   0  0  0  0  0  0  0  0  0  0  0  0
   -0.6679    2.3156    4.4292 H   0  0  0  0  0  0  0  0  0  0  0  0
    3.2393    0.5427    5.0816 H   0  0  0  0  0  0  0  0  0  0  0  0
    2.5477   -0.1047    7.3250 H   0  0  0  0  0  0  0  0  0  0  0  0
    3.5514    0.7141    3.2008 H   0  0  0  0  0  0  0  0  0  0  0  0
    3.2036    1.6666    1.7508 H   0  0  0  0  0  0  0  0  0  0  0  0
    3.6873    2.4982    3.2595 H   0  0  0  0  0  0  0  0  0  0  0  0
   -0.1958    2.2951    2.5752 H   0  0  0  0  0  0  0  0  0  0  0  0
    0.9549    3.6439    2.6989 H   0  0  0  0  0  0  0  0  0  0  0  0
    1.7486    4.5249    0.7547 H   0  0  0  0  0  0  0  0  0  0  0  0
    1.9913    4.5136   -1.7083 H   0  0  0  0  0  0  0  0  0  0  0  0
    1.8138    3.3026   -3.8745 H   0  0  0  0  0  0  0  0  0  0  0  0
    1.2464    1.2536   -5.1762 H   0  0  0  0  0  0  0  0  0  0  0  0
    0.4585   -1.1052   -5.2609 H   0  0  0  0  0  0  0  0  0  0  0  0
   -0.3553   -3.1369   -4.0786 H   0  0  0  0  0  0  0  0  0  0  0  0
   -0.5959   -3.1389   -1.6028 H   0  0  0  0  0  0  0  0  0  0  0  0
   -0.4030   -1.9333    0.5756 H   0  0  0  0  0  0  0  0  0  0  0  0
    0.2202    0.0745    1.8801 H   0  0  0  0  0  0  0  0  0  0  0  0
  1 40  1  0
  1  6  4  0
  1  2  1  0
  2 11  4  0
  2  3  4  0
  3  7  4  0
  3  4  1  0
  4 10  4  0
  4  5  1  0
  5 42  1  0
  5  6  4  0
  6 41  1  0
  7 13  4  0
  7  8  1  0
  8  9  4  0
  8 16  1  0
  9 44  1  0
  9 10  4  0
 10 43  1  0
 11 39  1  0
 11 12  4  0
 12 38  1  0
 12 13  4  0
 13 14  1  0
 14 37  1  0
 14 15  4  0
 15 36  1  0
 15 16  4  0
 16 17  1  0
 17 34  1  0
 17 35  1  0
 17 20  1  0
 18 29  1  0
 18 21  4  0
 18 19  4  0
 19 20  1  0
 19 24  4  0
 20 25  1  0
 21 30  1  0
 21 22  4  0
 22 26  1  0
 22 23  4  0
 23 27  1  0
 23 24  4  0
 24 28  1  0
 25 32  1  0
 25 31  1  0
 25 33  1  0
M  END
