# Supplementary material for: Spin Orbit Coupling in Orthogonal Charge Transfer States: (TD-)DFT of Pyrene - Dimethylaniline
Source: Preprints.org preprint supplement (doi:10.20944/preprints202112.0109.v2), 2021-12-16
Supplement: Supplementary file 3 [file supplementary › Supporting INFO-14-12-2021/Coordinate files/PyrDMA/PBE/T2/PyrDMA-geometry-PBE-T2-Hexane.mol]

T2-Hexane
SCM ADF package: www.scm.com

 44 48  0  0  0  0  0  0  0  0999 V2000
    0.2959   -1.0828   -4.2064 C   0  0  0  0  0  0  0  0  0  0  0  0
    0.6704    0.0975   -3.4631 C   0  0  0  0  0  0  0  0  0  0  0  0
    0.5418    0.0915   -2.0347 C   0  0  0  0  0  0  0  0  0  0  0  0
    0.0445   -1.0774   -1.3707 C   0  0  0  0  0  0  0  0  0  0  0  0
   -0.3138   -2.2307   -2.1647 C   0  0  0  0  0  0  0  0  0  0  0  0
   -0.1845   -2.2130   -3.5513 C   0  0  0  0  0  0  0  0  0  0  0  0
    0.8990    1.2456   -1.2781 C   0  0  0  0  0  0  0  0  0  0  0  0
    0.7592    1.2416    0.1511 C   0  0  0  0  0  0  0  0  0  0  0  0
    0.2784    0.0818    0.7743 C   0  0  0  0  0  0  0  0  0  0  0  0
   -0.0779   -1.0602    0.0247 C   0  0  0  0  0  0  0  0  0  0  0  0
    1.1503    1.2509   -4.0997 C   0  0  0  0  0  0  0  0  0  0  0  0
    1.4976    2.3917   -3.3547 C   0  0  0  0  0  0  0  0  0  0  0  0
    1.3771    2.4116   -1.9579 C   0  0  0  0  0  0  0  0  0  0  0  0
    1.7066    3.5792   -1.1780 C   0  0  0  0  0  0  0  0  0  0  0  0
    1.5446    3.5771    0.2022 C   0  0  0  0  0  0  0  0  0  0  0  0
    1.0935    2.4493    0.8961 C   0  0  0  0  0  0  0  0  0  0  0  0
    0.8274    2.5308    2.3735 C   0  0  0  0  0  0  0  0  0  0  0  0
    2.2747    0.9332    5.4870 C   0  0  0  0  0  0  0  0  0  0  0  0
    1.3504    1.4511    4.5382 C   0  0  0  0  0  0  0  0  0  0  0  0
    1.7380    1.7517    3.2422 N   0  0  0  0  0  0  0  0  0  0  0  0
    1.8655    0.5520    6.7648 C   0  0  0  0  0  0  0  0  0  0  0  0
    0.5333    0.6791    7.1705 C   0  0  0  0  0  0  0  0  0  0  0  0
   -0.3856    1.2035    6.2554 C   0  0  0  0  0  0  0  0  0  0  0  0
    0.0040    1.5957    4.9761 C   0  0  0  0  0  0  0  0  0  0  0  0
    3.1593    1.8180    2.9260 C   0  0  0  0  0  0  0  0  0  0  0  0
    0.2194    0.3844    8.1732 H   0  0  0  0  0  0  0  0  0  0  0  0
   -1.4327    1.3293    6.5428 H   0  0  0  0  0  0  0  0  0  0  0  0
   -0.7541    2.0085    4.3128 H   0  0  0  0  0  0  0  0  0  0  0  0
    3.3233    0.8148    5.2186 H   0  0  0  0  0  0  0  0  0  0  0  0
    2.6122    0.1561    7.4577 H   0  0  0  0  0  0  0  0  0  0  0  0
    3.6501    0.8675    3.1757 H   0  0  0  0  0  0  0  0  0  0  0  0
    3.2719    1.9726    1.8494 H   0  0  0  0  0  0  0  0  0  0  0  0
    3.6874    2.6374    3.4523 H   0  0  0  0  0  0  0  0  0  0  0  0
   -0.1938    2.1666    2.5575 H   0  0  0  0  0  0  0  0  0  0  0  0
    0.8536    3.5993    2.6648 H   0  0  0  0  0  0  0  0  0  0  0  0
    1.7742    4.4893    0.7604 H   0  0  0  0  0  0  0  0  0  0  0  0
    2.0723    4.4672   -1.6968 H   0  0  0  0  0  0  0  0  0  0  0  0
    1.8607    3.2821   -3.8726 H   0  0  0  0  0  0  0  0  0  0  0  0
    1.2476    1.2594   -5.1874 H   0  0  0  0  0  0  0  0  0  0  0  0
    0.3931   -1.0674   -5.2935 H   0  0  0  0  0  0  0  0  0  0  0  0
   -0.4639   -3.0940   -4.1328 H   0  0  0  0  0  0  0  0  0  0  0  0
   -0.6936   -3.1185   -1.6563 H   0  0  0  0  0  0  0  0  0  0  0  0
   -0.4531   -1.9513    0.5319 H   0  0  0  0  0  0  0  0  0  0  0  0
    0.1870    0.0492    1.8611 H   0  0  0  0  0  0  0  0  0  0  0  0
  1 40  1  0
  1  6  4  0
  1  2  1  0
  2 11  4  0
  2  3  4  0
  3  7  4  0
  3  4  1  0
  4 10  4  0
  4  5  1  0
  5 42  1  0
  5  6  4  0
  6 41  1  0
  7 13  4  0
  7  8  1  0
  8  9  4  0
  8 16  1  0
  9 44  1  0
  9 10  4  0
 10 43  1  0
 11 39  1  0
 11 12  4  0
 12 38  1  0
 12 13  4  0
 13 14  1  0
 14 37  1  0
 14 15  4  0
 15 36  1  0
 15 16  4  0
 16 17  1  0
 17 34  1  0
 17 35  1  0
 17 20  1  0
 18 29  1  0
 18 21  4  0
 18 19  4  0
 19 20  1  0
 19 24  4  0
 20 25  1  0
 21 30  1  0
 21 22  4  0
 22 26  1  0
 22 23  4  0
 23 27  1  0
 23 24  4  0
 24 28  1  0
 25 32  1  0
 25 31  1  0
 25 33  1  0
M  END
