# Supplementary material for: Spin Orbit Coupling in Orthogonal Charge Transfer States: (TD-)DFT of Pyrene - Dimethylaniline
Source: Preprints.org preprint supplement (doi:10.20944/preprints202112.0109.v2), 2021-12-16
Supplement: Supplementary file 3 [file supplementary › Supporting INFO-14-12-2021/Coordinate files/PyrDMA/Starting coordinates/Start-Coord-Pyr-DMA.mol2]

#
#	File Created by: Spartan '10 Export
#

@<TRIPOS>MOLECULE
M0001
44 48
SMALL
NO_CHARGES


@<TRIPOS>ATOM
    1   C1         0.434320774    -1.095329802    -4.148983946    C.ar   1  M0001
    2   C2         0.726788008     0.076680555    -3.434143860    C.ar   1  M0001
    3   C3         0.572856357     0.081748244    -2.013172845    C.ar   1  M0001
    4   C4         0.126089584    -1.099623281    -1.348147174    C.ar   1  M0001
    5   C5        -0.155038429    -2.248684224    -2.105460641    C.ar   1  M0001
    6   C6        -0.002118089    -2.243887929    -3.490008819    C.ar   1  M0001
    7   C7         0.861200788     1.262162465    -1.262164654    C.ar   1  M0001
    8   C8         0.706102990     1.267703799     0.160331547    C.ar   1  M0001
    9   C9         0.260280623     0.056812399     0.798467992    C.ar   1  M0001
   10   C10       -0.017680079    -1.065731099     0.078937196    C.ar   1  M0001
   11   C11        1.176500895     1.277088886    -4.084173380    C.ar   1  M0001
   12   C12        1.448978364     2.404147347    -3.372398435    C.ar   1  M0001
   13   C13        1.299720415     2.439846993    -1.943242395    C.ar   1  M0001
   14   C14        1.566125812     3.592913337    -1.193266726    C.ar   1  M0001
   15   C15        1.403843358     3.591866811     0.189354288    C.ar   1  M0001
   16   C16        0.980409328     2.454868000     0.883374184    C.ar   1  M0001
   17   C17        0.772752146     2.537540824     2.385340091     C.3   1  M0001
   18   C18        1.971186595     0.360486632     5.187521847    C.ar   1  M0001
   19   C19        1.312769462     1.397853953     4.495351287    C.ar   1  M0001
   20   N20        1.673507951     1.676482286     3.154407175     N.3   1  M0001
   21   C21        1.622557261     0.034510838     6.493103365    C.ar   1  M0001
   22   C22        0.596293167     0.719061159     7.151007200    C.ar   1  M0001
   23   C23       -0.068390355     1.738811589     6.475253032    C.ar   1  M0001
   24   C24        0.285775044     2.083943968     5.168312152    C.ar   1  M0001
   25   C25        3.089731711     1.939293899     2.899121706     C.3   1  M0001
   26   H26        0.318451074     0.455115707     8.177823917       H   1  M0001
   27   H27       -0.873181932     2.293541945     6.971035997       H   1  M0001
   28   H28       -0.241755105     2.912787885     4.682569727       H   1  M0001
   29   H29        2.750009269    -0.218408036     4.678078812       H   1  M0001
   30   H30        2.151623771    -0.780917289     6.999444751       H   1  M0001
   31   H31        3.716908095     1.229883890     3.451030414       H   1  M0001
   32   H32        3.300949268     1.821276685     1.830161894       H   1  M0001
   33   H33        3.381160911     2.952799614     3.197603173       H   1  M0001
   34   H34       -0.252030094     2.228290726     2.620715824       H   1  M0001
   35   H35        0.863543191     3.587306077     2.686945627       H   1  M0001
   36   H36        1.612142432     4.507824764     0.754021024       H   1  M0001
   37   H37        1.902448189     4.501523136    -1.705644996       H   1  M0001
   38   H38        1.789279007     3.313702442    -3.880454537       H   1  M0001
   39   H39        1.294589244     1.265685014    -5.173733426       H   1  M0001
   40   H40        0.552570024    -1.098320084    -5.238582117       H   1  M0001
   41   H41       -0.226794823    -3.148961181    -4.065837590       H   1  M0001
   42   H42       -0.498443771    -3.154093023    -1.592115068       H   1  M0001
   43   H43       -0.356461437    -1.974857798     0.588772304       H   1  M0001
   44   H44        0.168406030     0.041246546     1.890499477       H   1  M0001


@<TRIPOS>BOND
    1      1      2    ar
    2      2      3    ar
    3      3      4    ar
    4      4      5    ar
    5      5      6    ar
    6      1      6    ar
    7      3      7    ar
    8      7      8    ar
    9      8      9    ar
   10      9     10    ar
   11      4     10    ar
   12      2     11    ar
   13     11     12    ar
   14     12     13    ar
   15      7     13    ar
   16     13     14    ar
   17     14     15    ar
   18     15     16    ar
   19      8     16    ar
   20     17     16    1
   21     18     19    ar
   22     19     20    1
   23     20     17    1
   24     18     21    ar
   25     21     22    ar
   26     22     23    ar
   27     23     24    ar
   28     24     19    ar
   29     25     20    1
   30     22     26    1
   31     23     27    1
   32     24     28    1
   33     18     29    1
   34     21     30    1
   35     25     31    1
   36     25     32    1
   37     25     33    1
   38     17     34    1
   39     17     35    1
   40     15     36    1
   41     14     37    1
   42     12     38    1
   43     11     39    1
   44      1     40    1
   45      6     41    1
   46      5     42    1
   47     10     43    1
   48      9     44    1
