# Supplementary material for: Spin Orbit Coupling in Orthogonal Charge Transfer States: (TD-)DFT of Pyrene - Dimethylaniline
Source: Preprints.org preprint supplement (doi:10.20944/preprints202112.0109.v2), 2021-12-16
Supplement: Supplementary file 3 [file supplementary › Supporting INFO-14-12-2021/Input files/HR attempts/CR/Gas/Huang-Rhys-factors.txt]

#! /bin/sh

#SBATCH -t 10:00:00
#SBATCH -N 2
#SBATCH -n 16

$ADFBIN/fcf << eor

STATES S1.rkf T1.rkf
QUANTA 0 20
MODES 0 1000
TRANSLATE
ROTATE


eor
